# Supplementary material for: Predicted Metabolic Pathway Distributions in Stool Bacteria in Very-Low-Birth-Weight Infants: Potential Relationships with NICU Faltered Growth
Source: MDPI journal article supplement (doi:10.3390/nu12051345), 2020-05-08

## Supplementary data

Metabolic Pathway Distributions in Very Low Birth Weight Infants:  
Potential Relationships with NICU Faltered Growth

**S3. Association of the relative abundance of bacterial family between VLBW infants and term infants** . Each page of this file shows a separate bacterial family which was significantly different between the two groups. The box plots indicate the association of the metadata (here, the two groups preterm and term infants) with the relative abundances. The strength of association is indicated by the p-value and an FDR-corrected q-value. The partial residual plot shows the relationship between the groups with abundances when all other variables are included in the model.

typeTerm (0.0119 sd 0.000754, p=2.24e-45, q=2.66e-43)

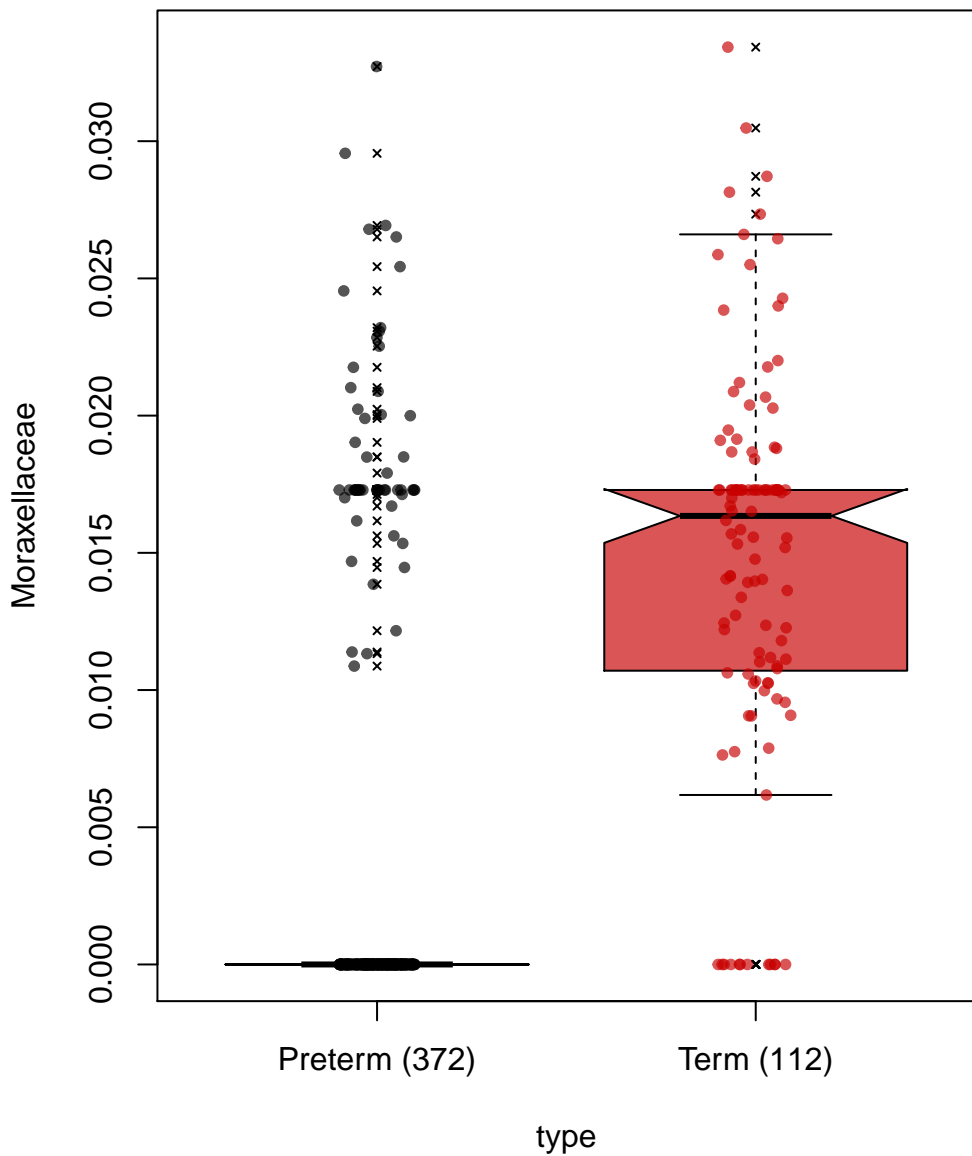

Partial Residual Plot

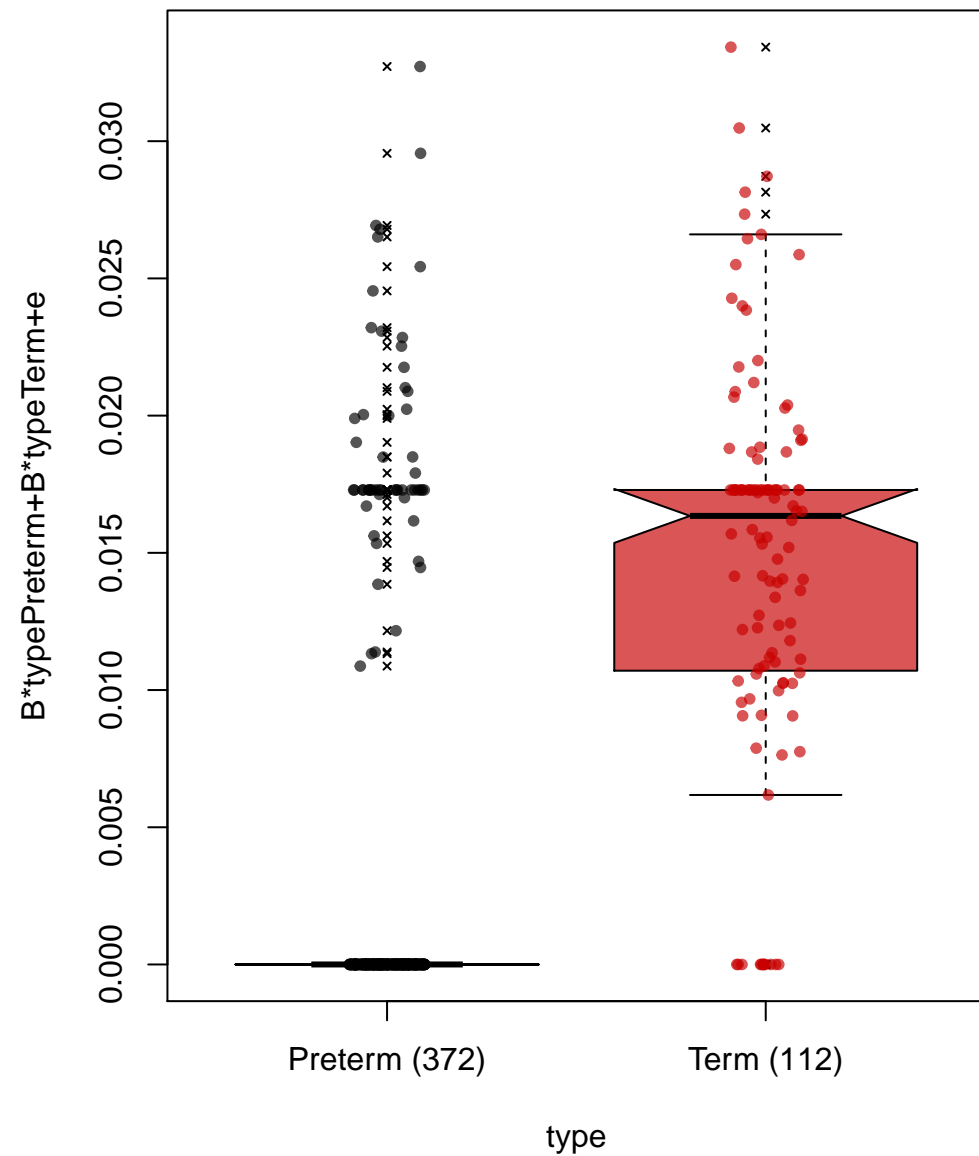

typeTerm (0.273 sd 0.0191, p=4.69e-39, q=2.79e-37)

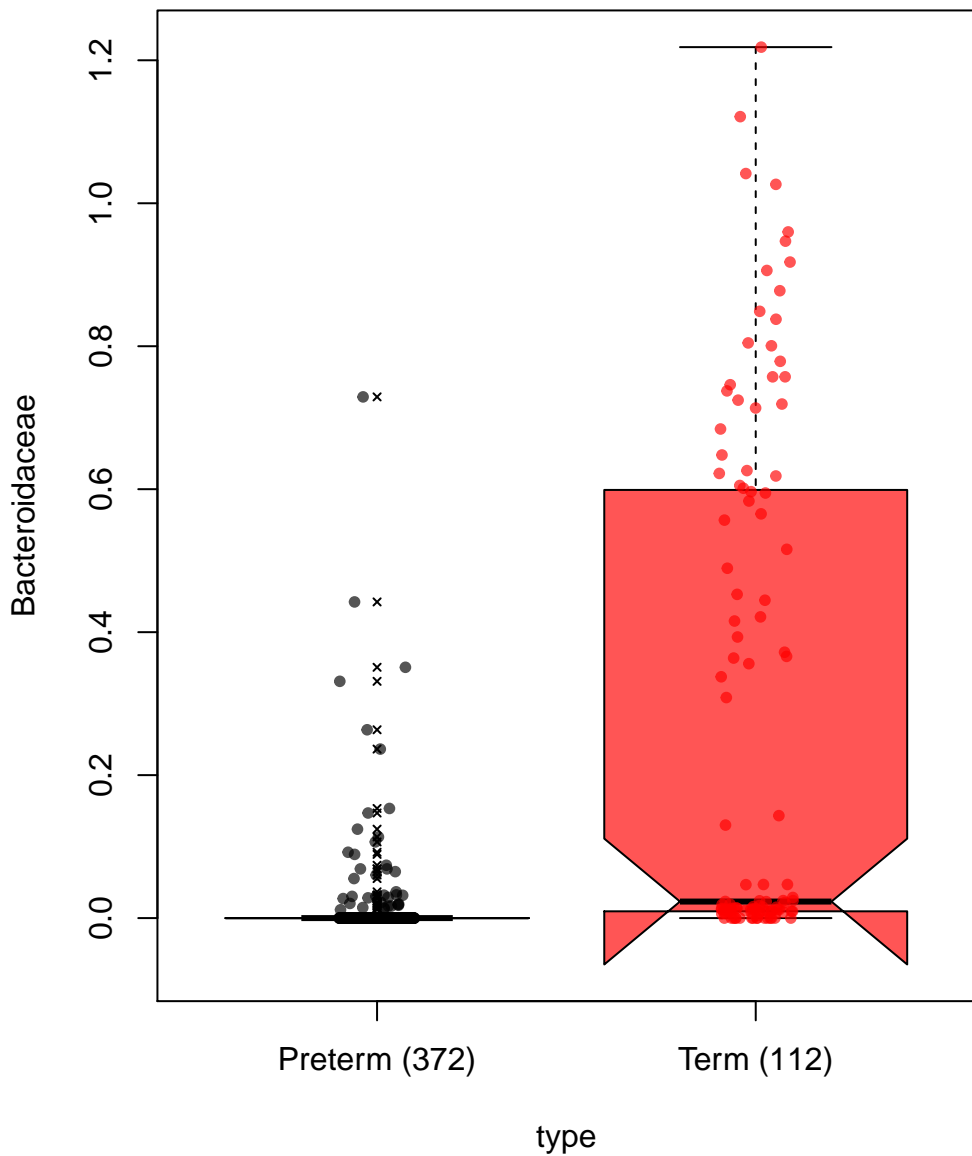

Partial Residual Plot

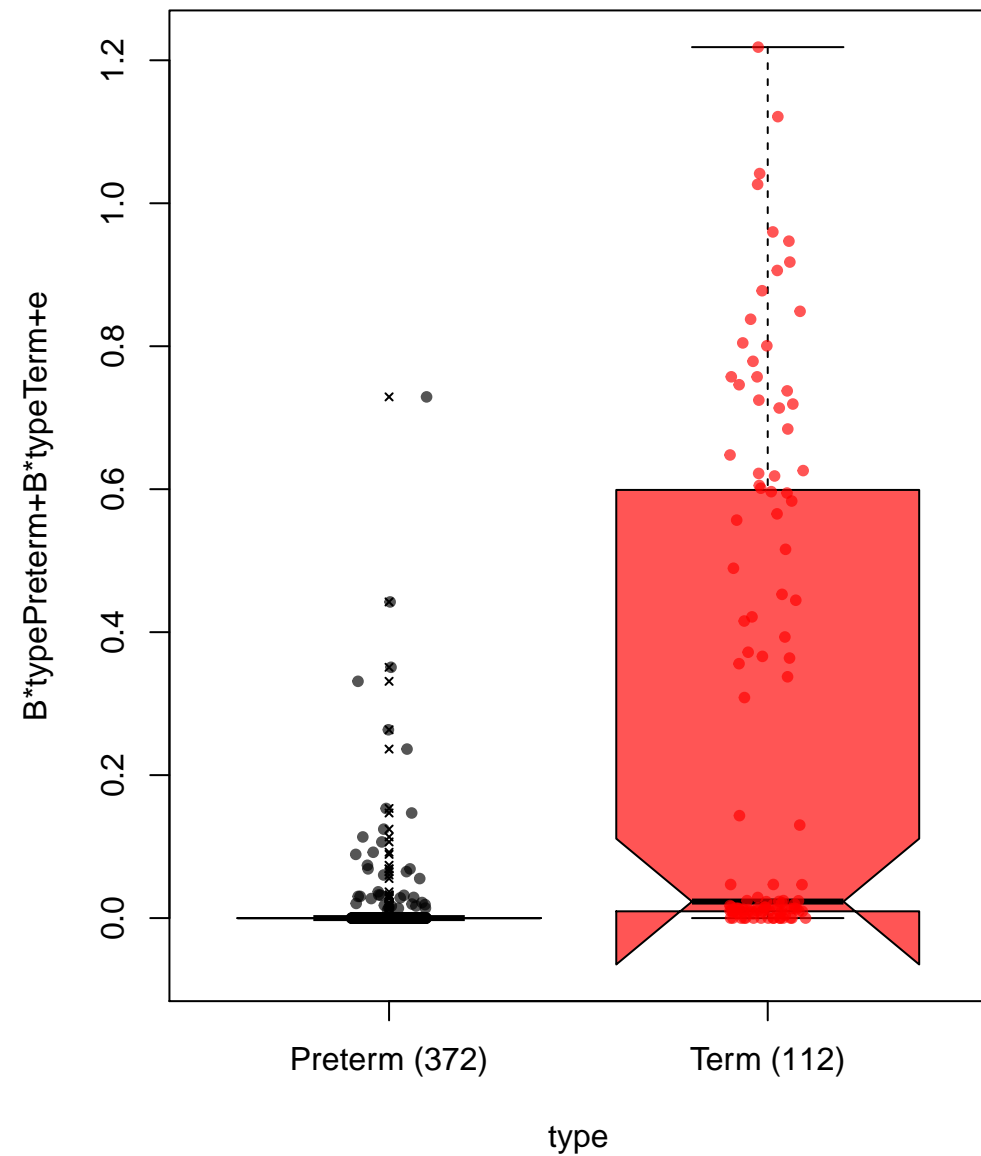

typeTerm (0.0179 sd 0.00176, p=4.59e-22, q=1.82e-20)

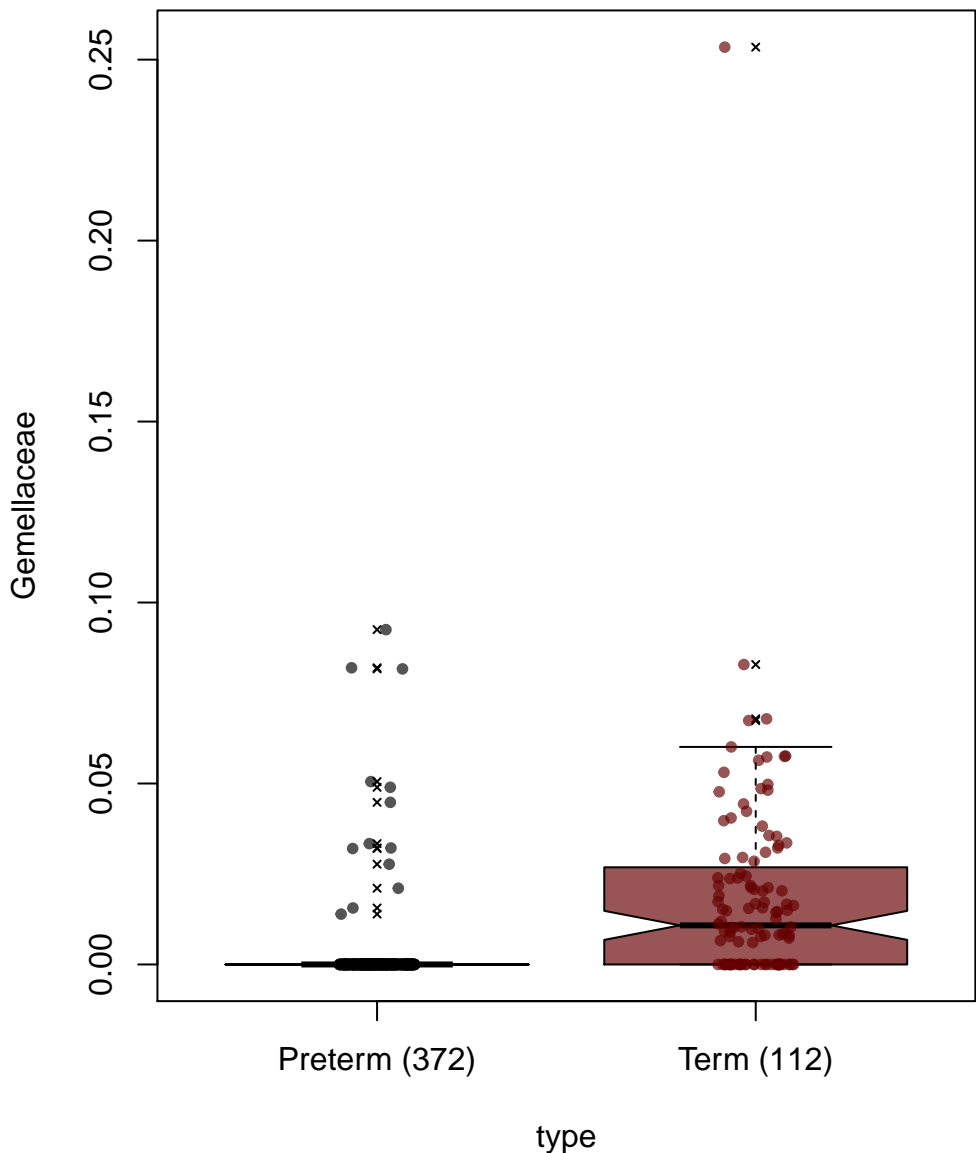

Partial Residual Plot

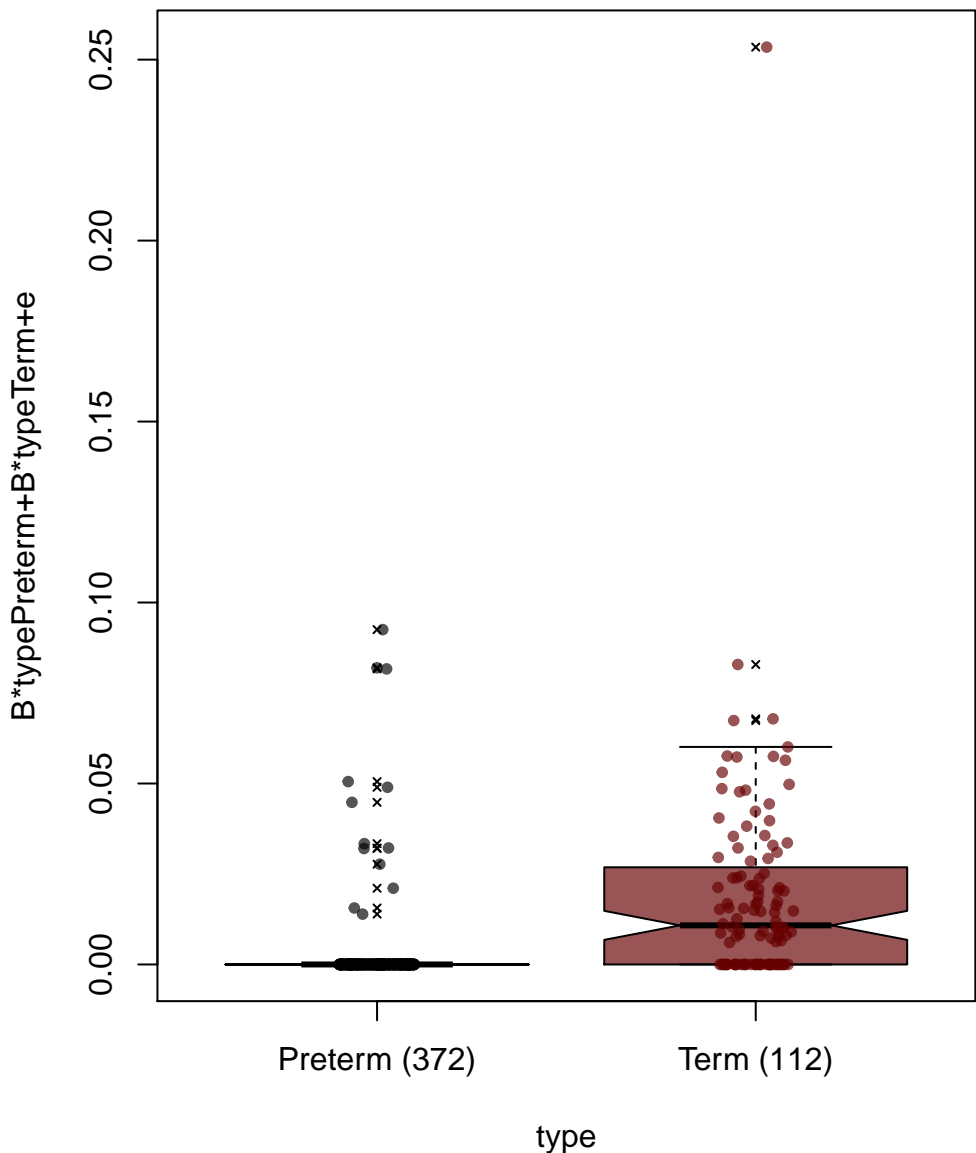

typeTerm (0.0802 sd 0.00832, p=3.31e-20, q=9.84e-19)

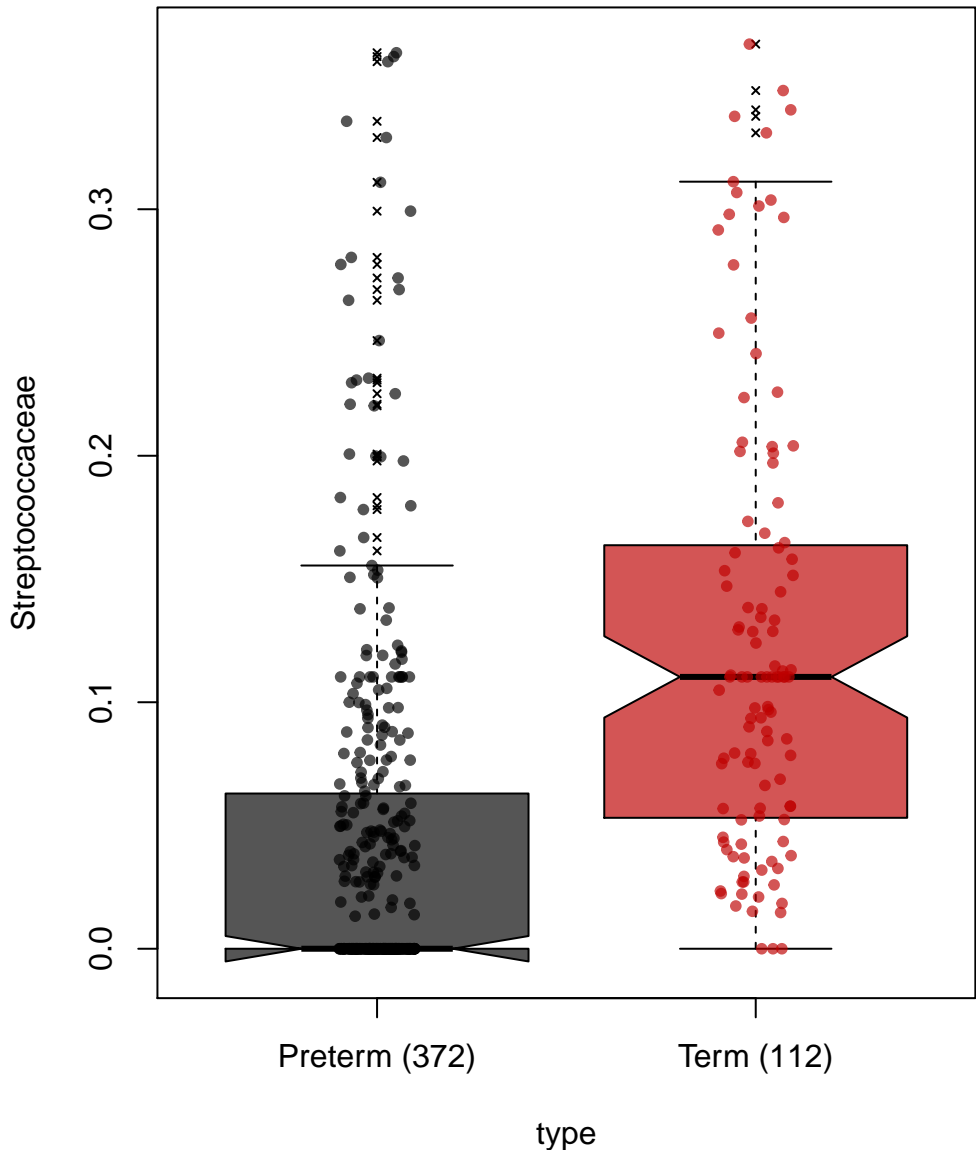

Partial Residual Plot

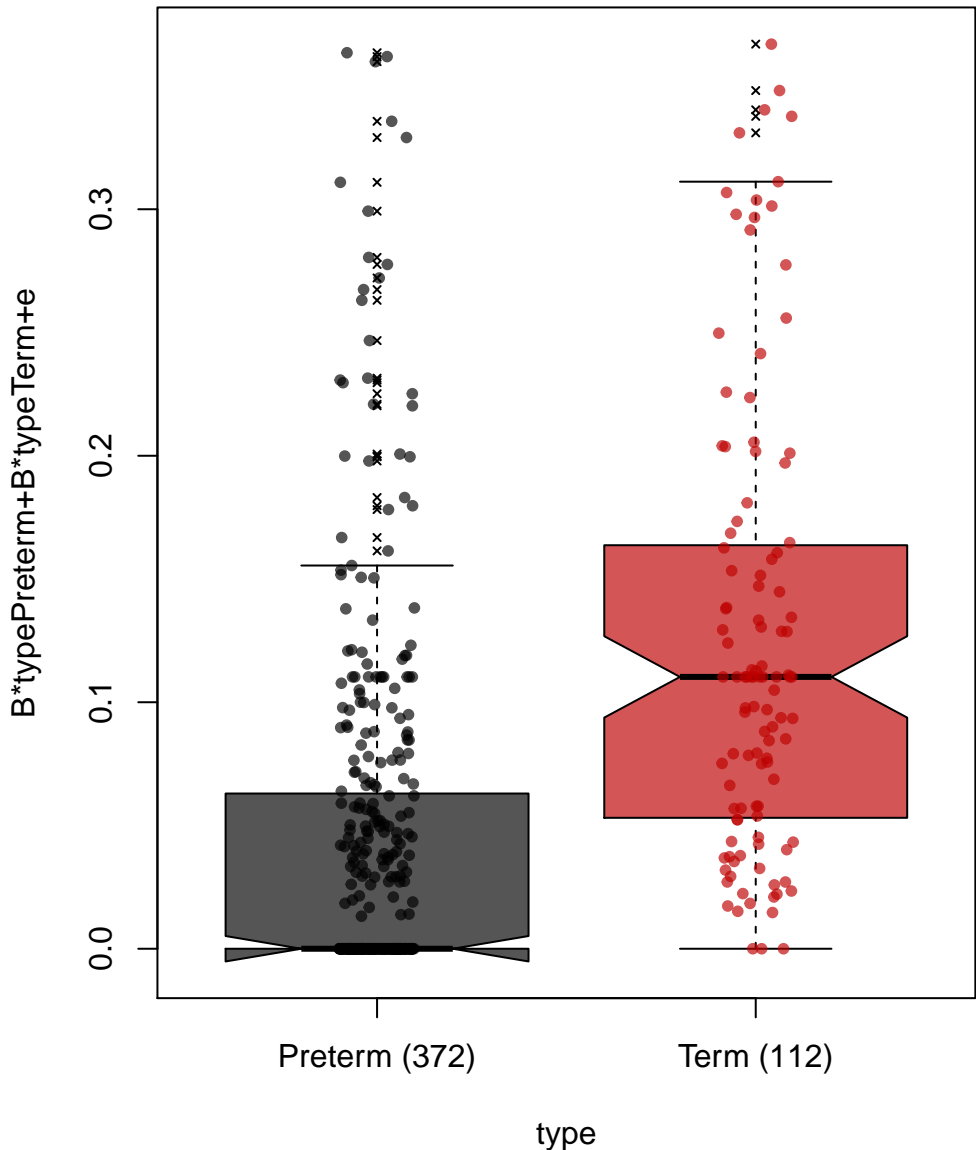

typeTerm ( $-0.407$  sd  $0.0477$ ,  $p=2.1e-16$ ,  $q=4.99e-15$ )

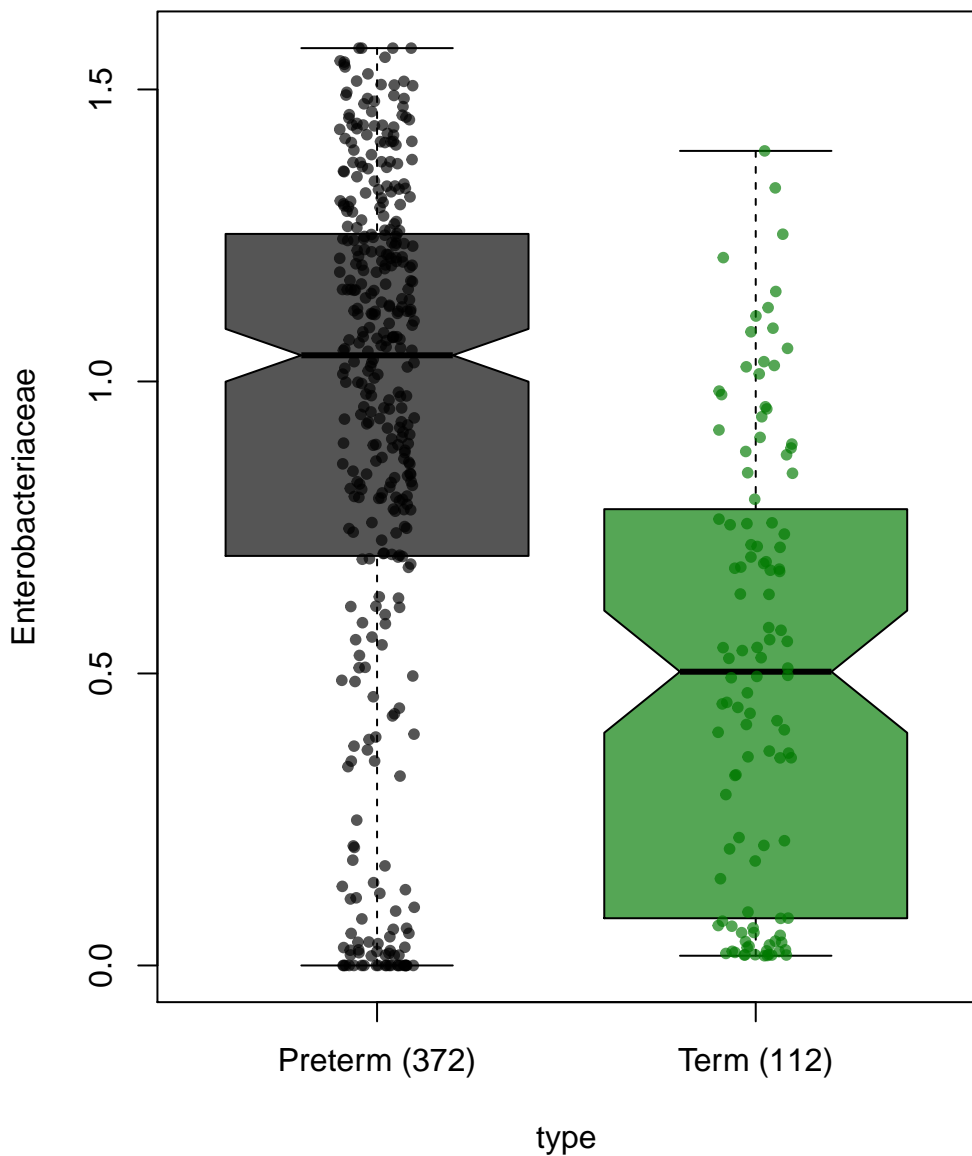

Partial Residual Plot

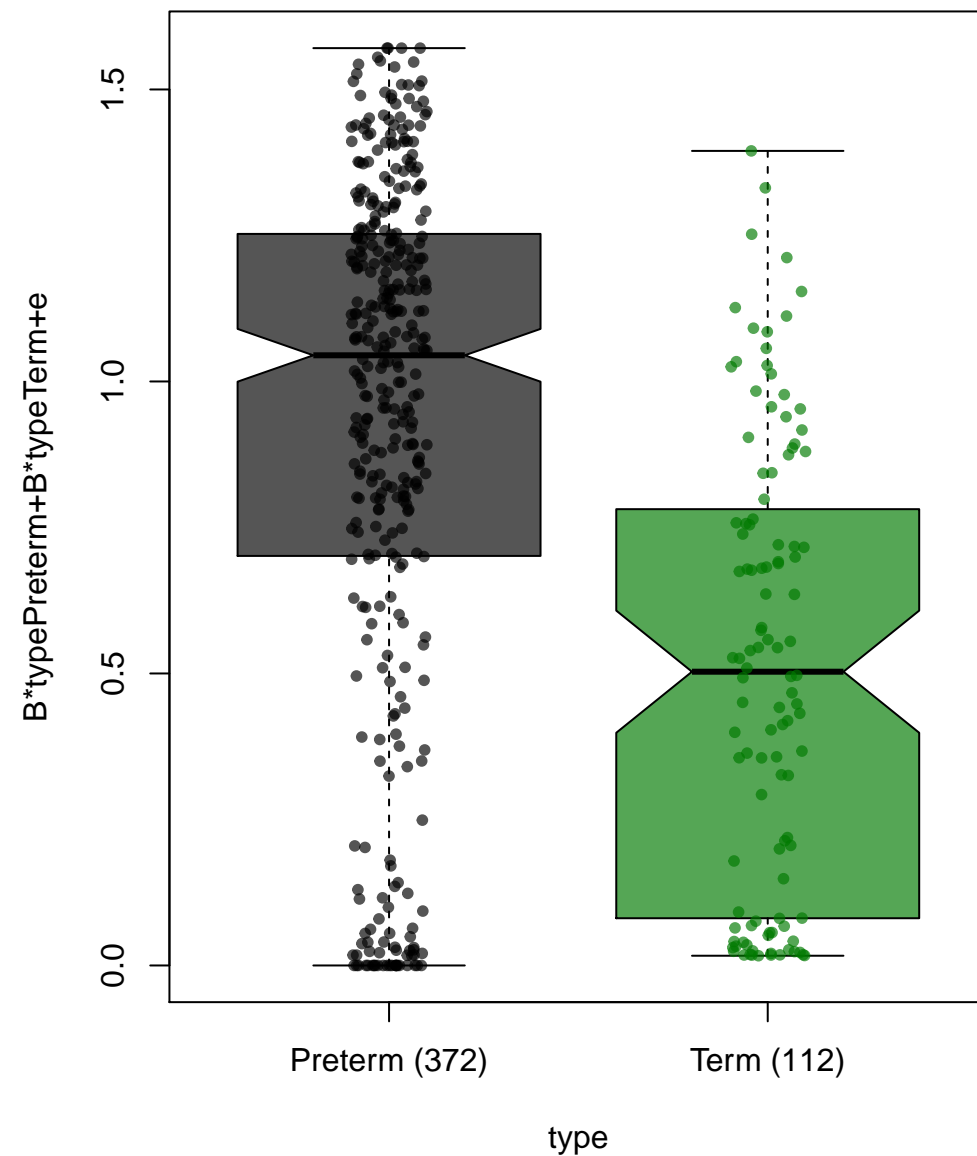

typeTerm (0.0157 sd 0.00197, p=1.03e-14, q=2.04e-13)

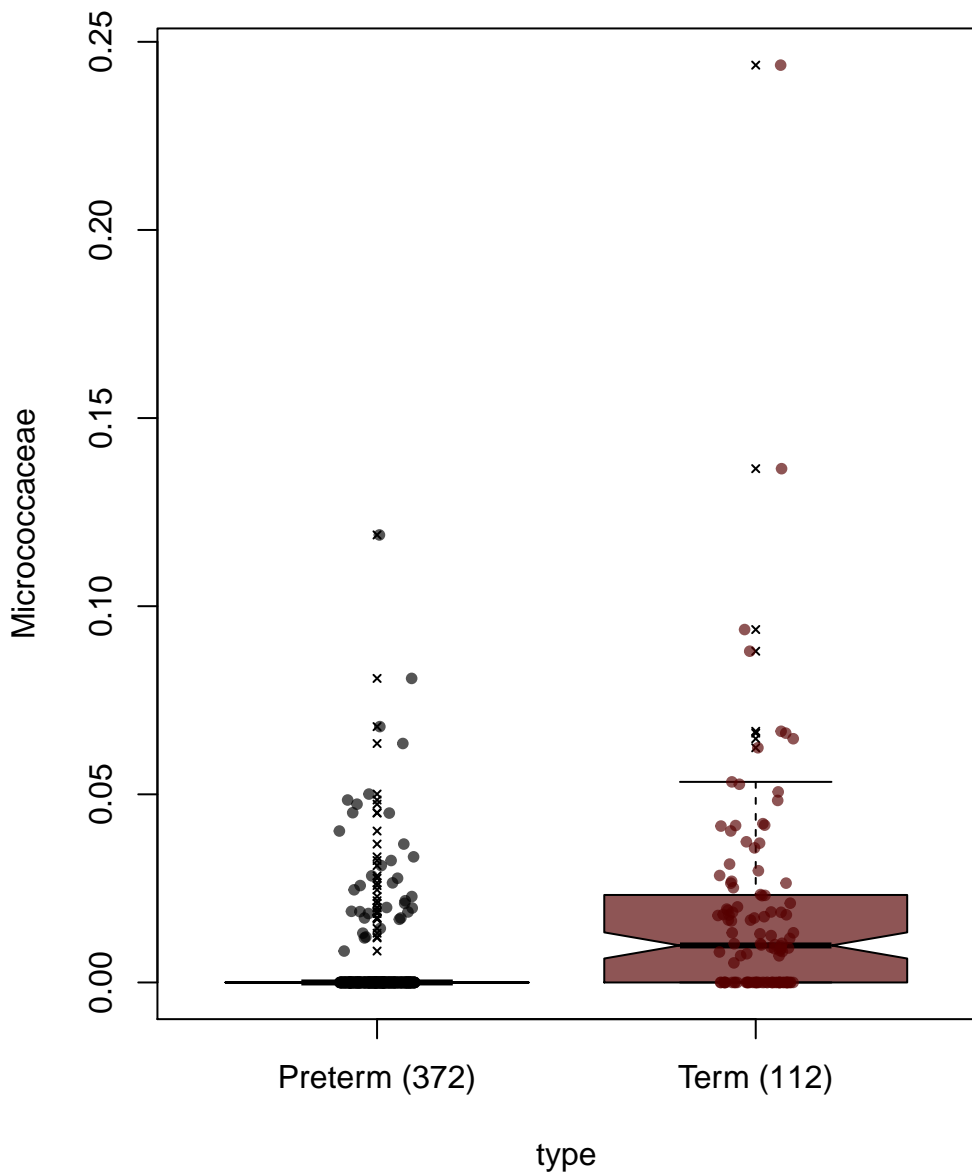

Partial Residual Plot

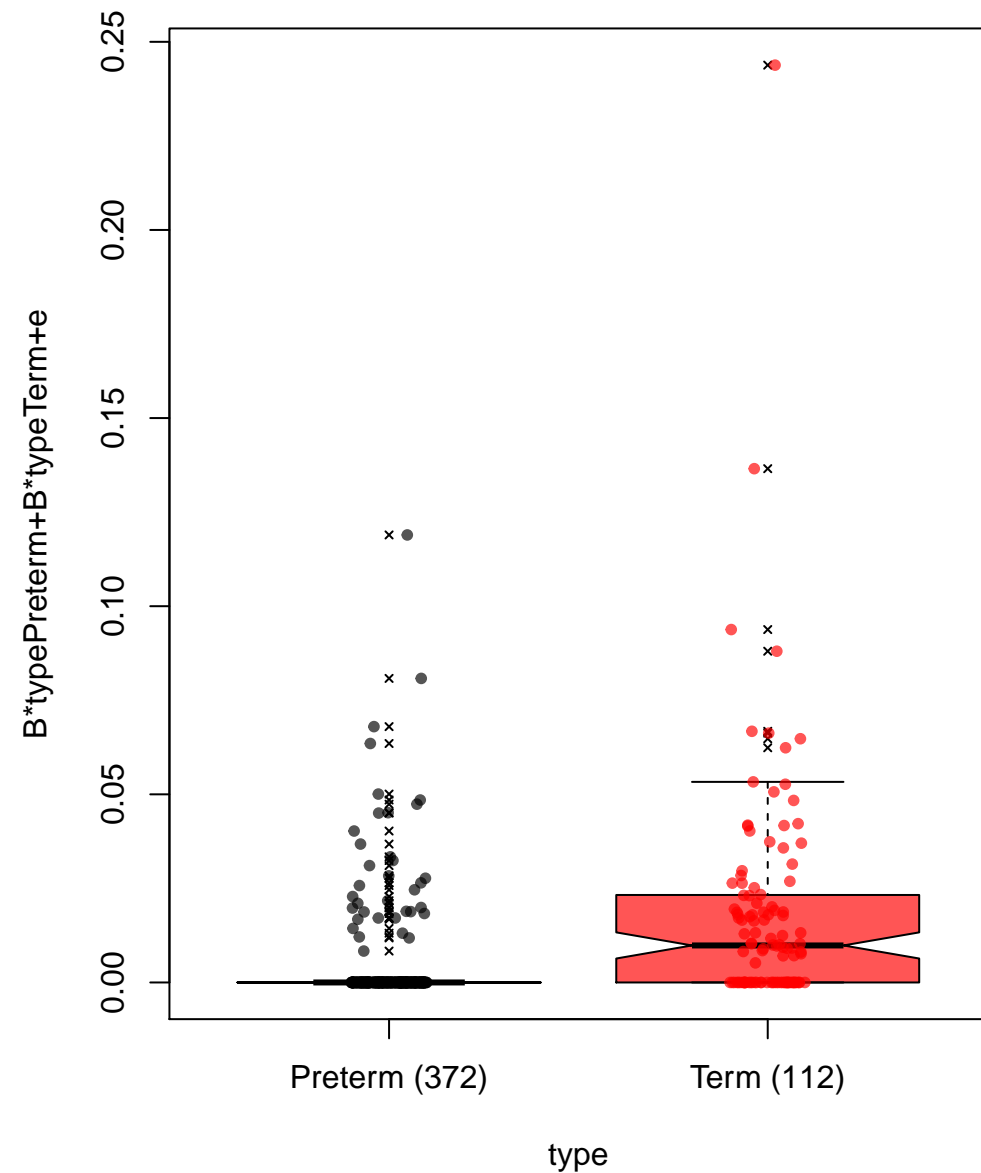

typeTerm (-0.138 sd 0.0175, p=1.88e-14, q=3.19e-13)

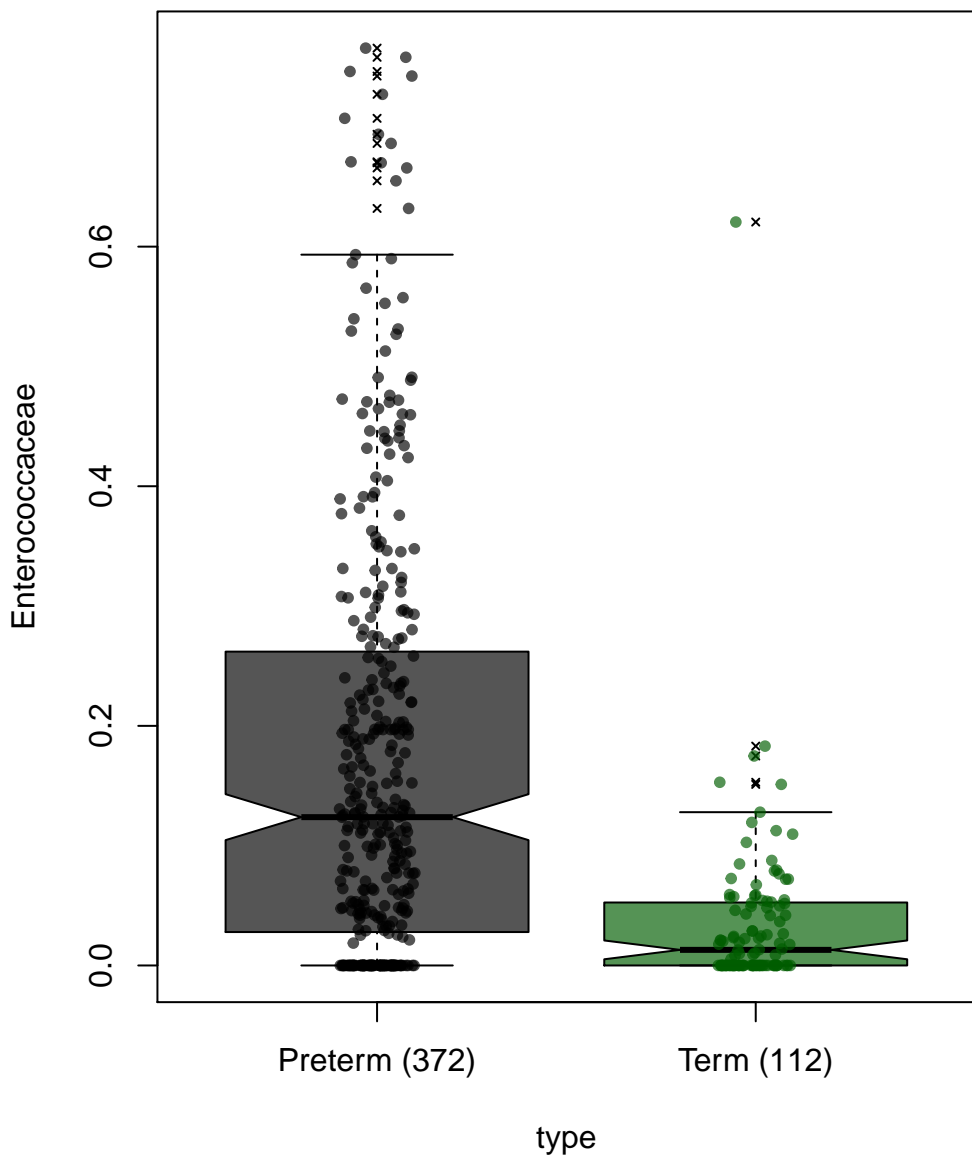

Partial Residual Plot

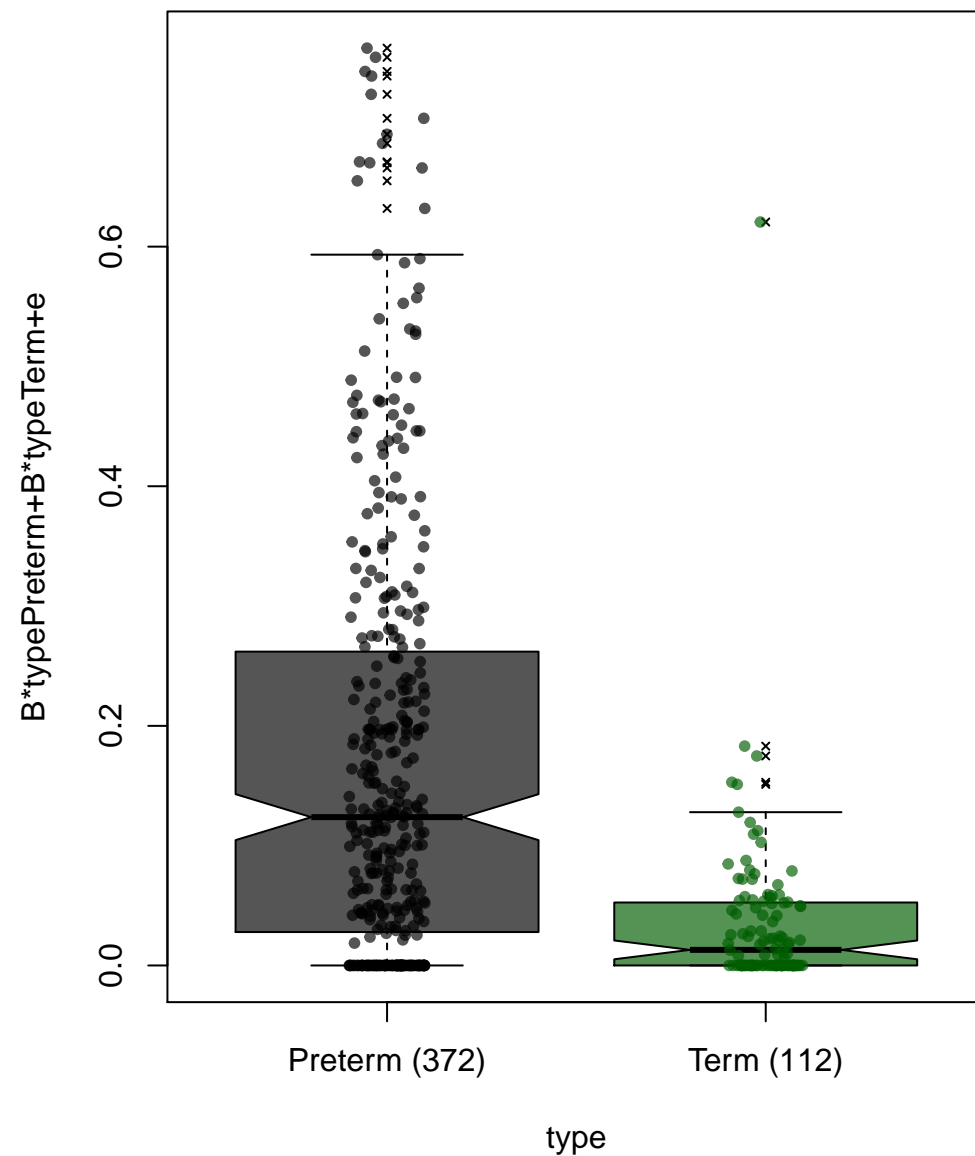



typeTerm (0.0666 sd 0.00912, p=1.22e-12, q=1.81e-11)

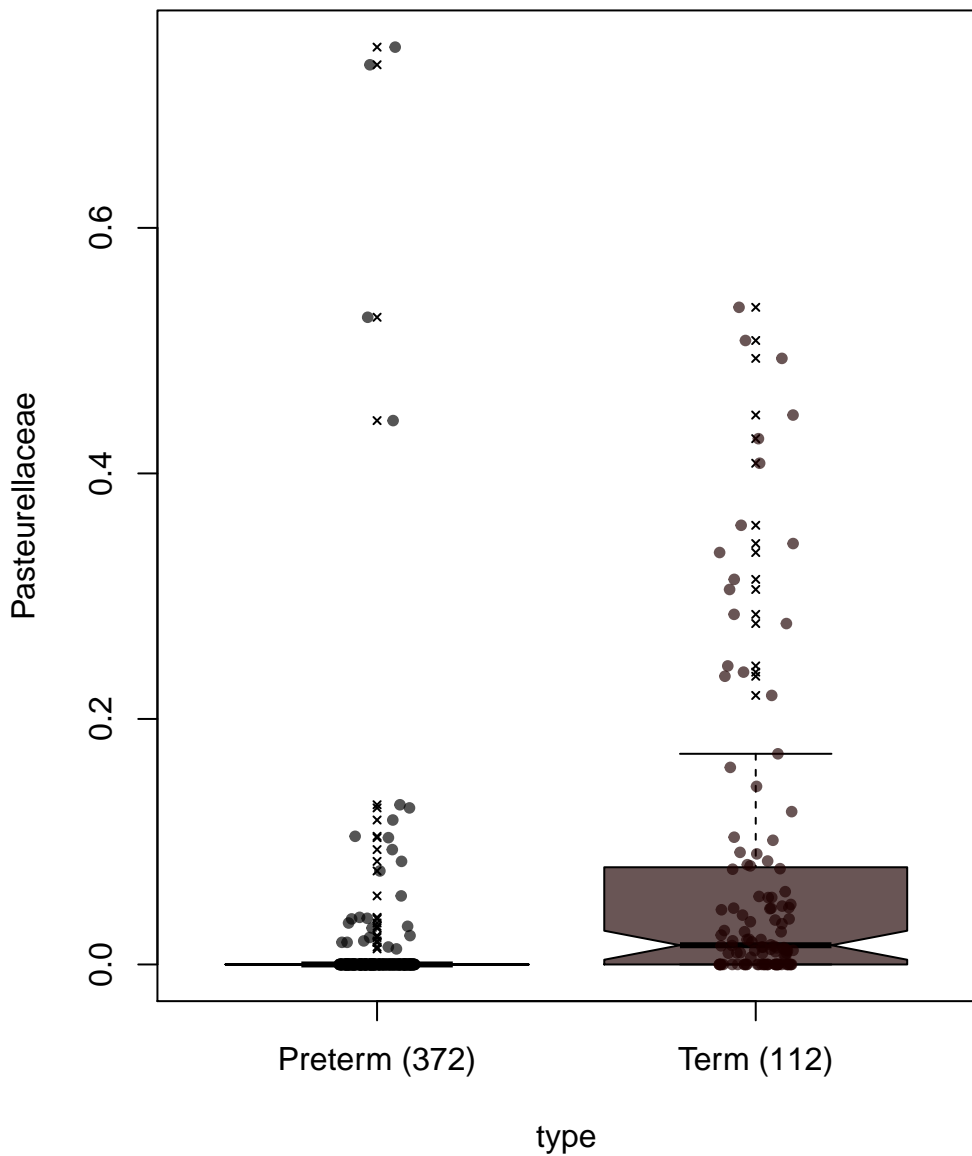

Partial Residual Plot

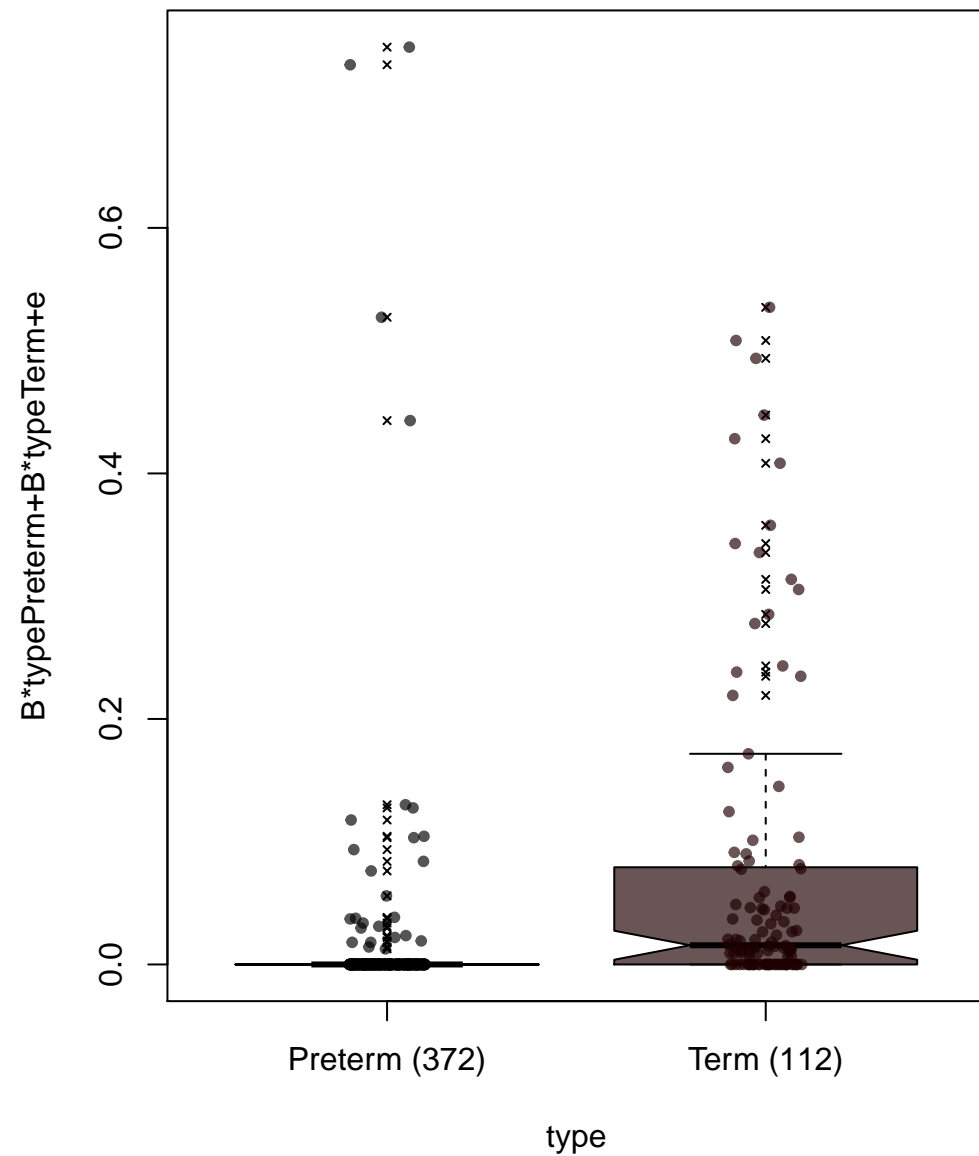

typeTerm (0.0655 sd 0.0097, p=4.28e-11, q=5.66e-10)

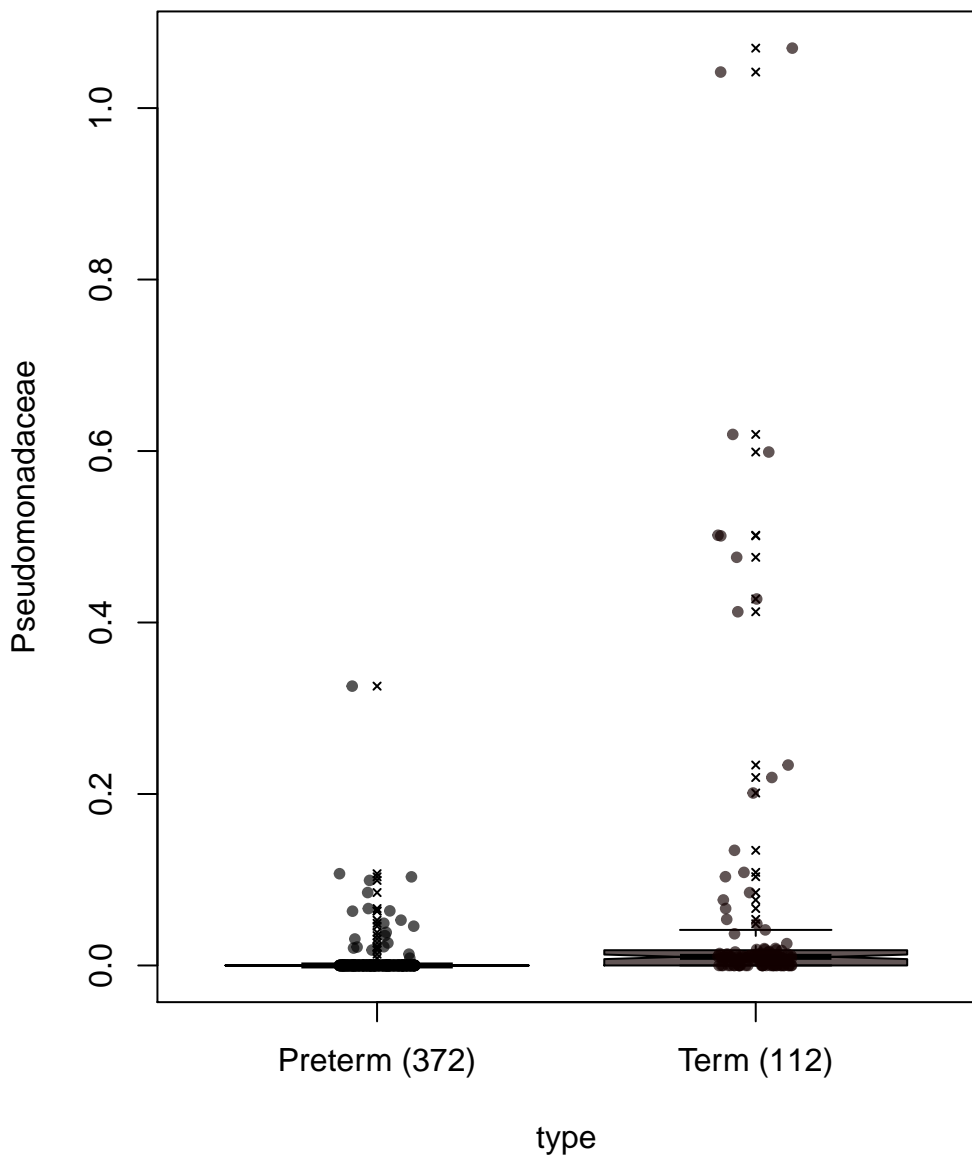

Partial Residual Plot

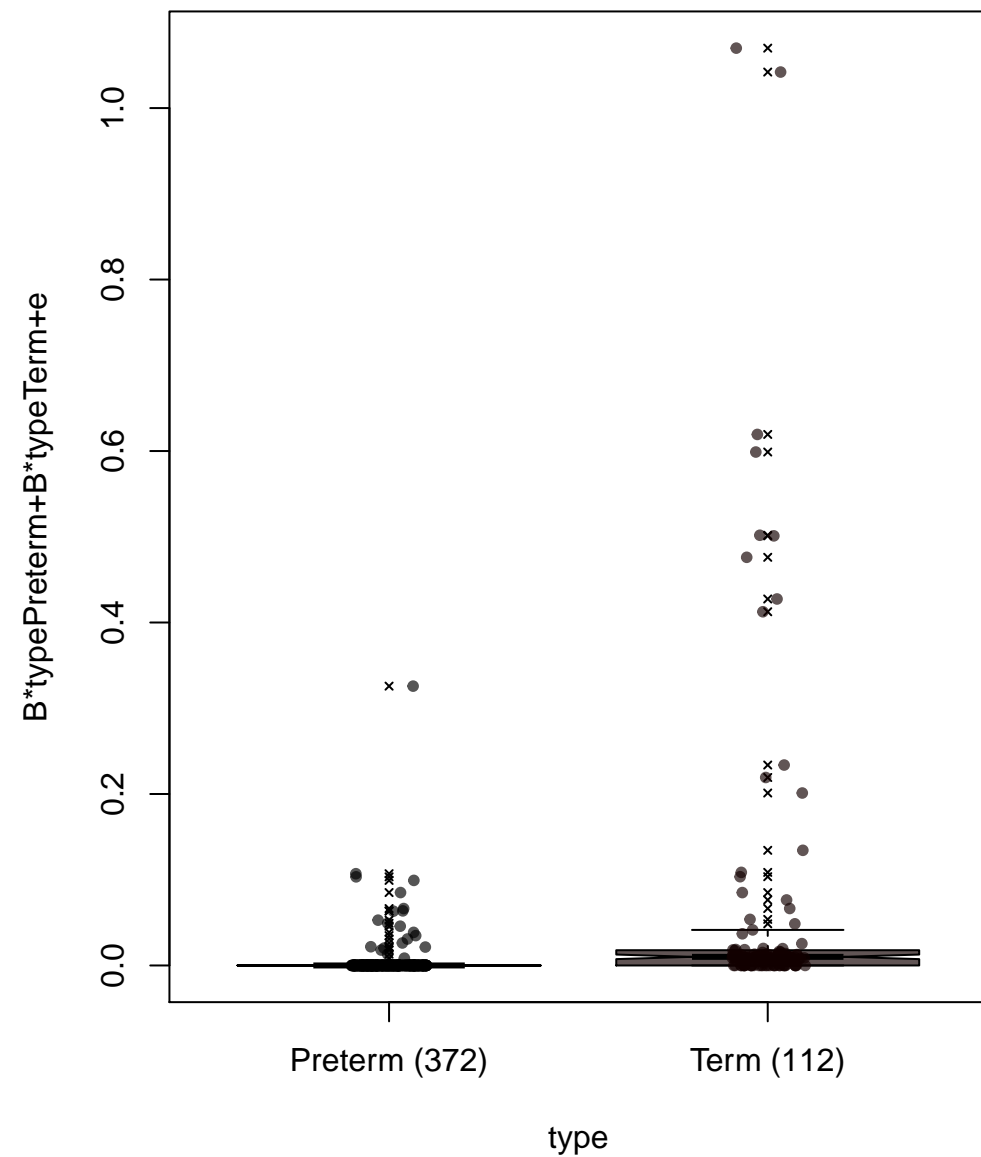

typeTerm (0.0254 sd 0.00387, p=1.32e-10, q=1.57e-09)

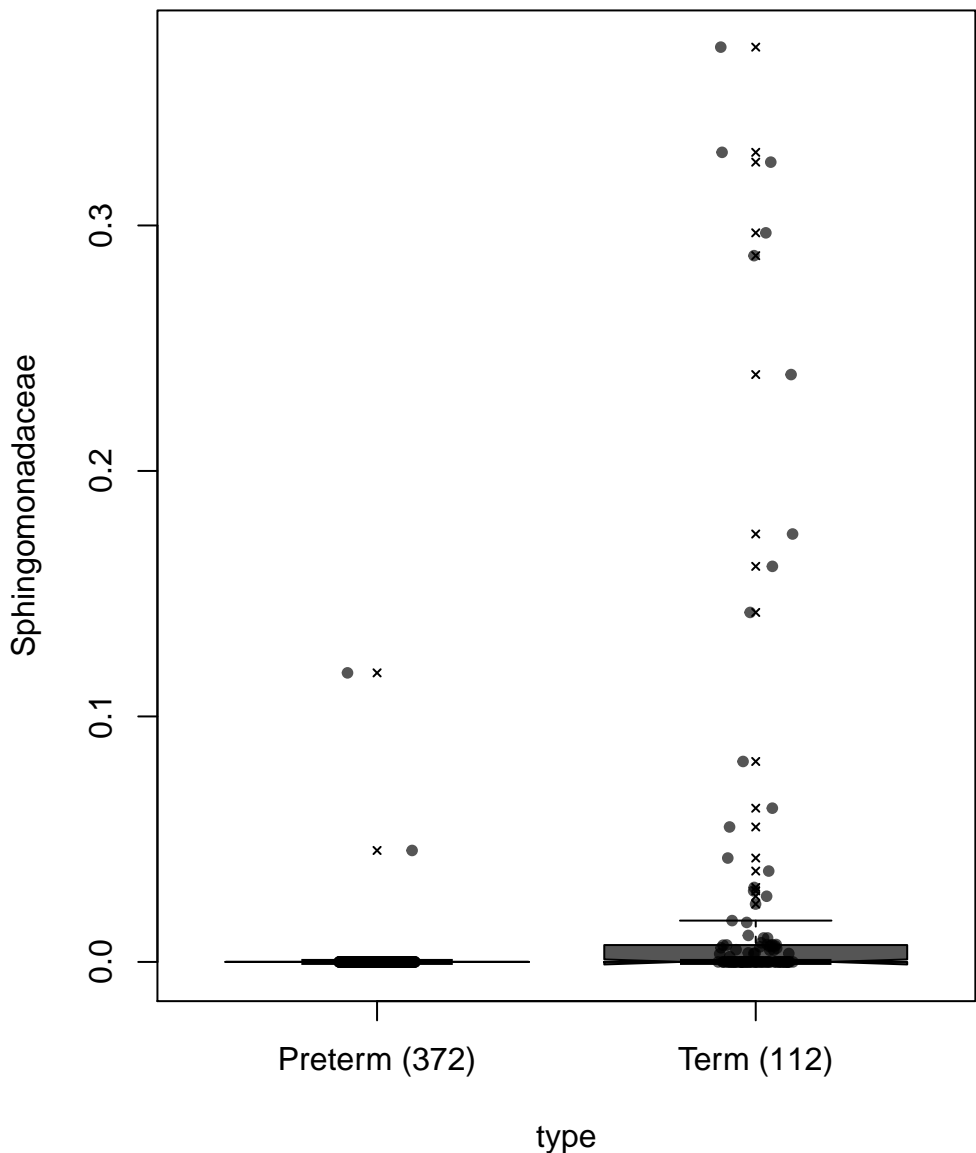

Partial Residual Plot

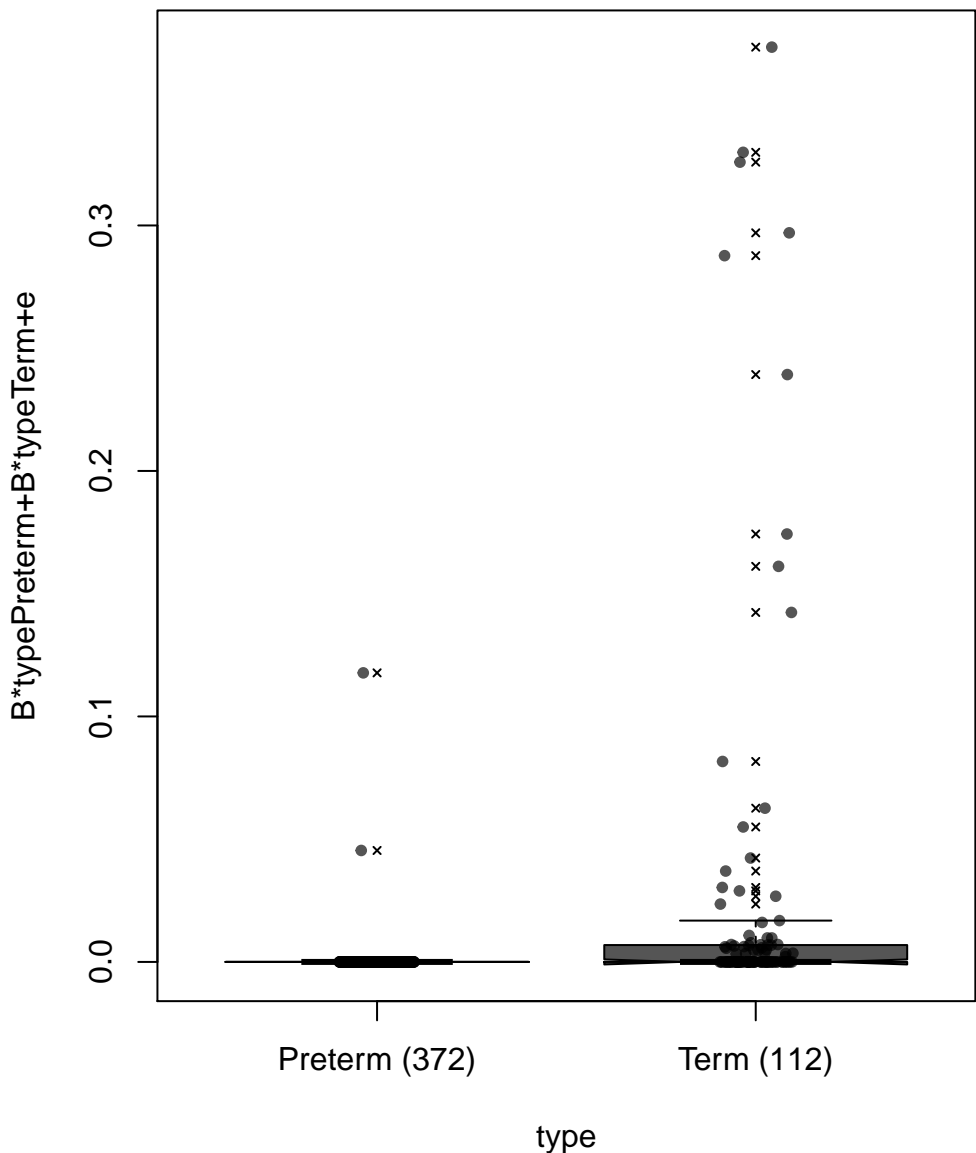

**typeTerm (0.0162 sd 0.0025, p=2.58e-10, q=2.79e-09)**

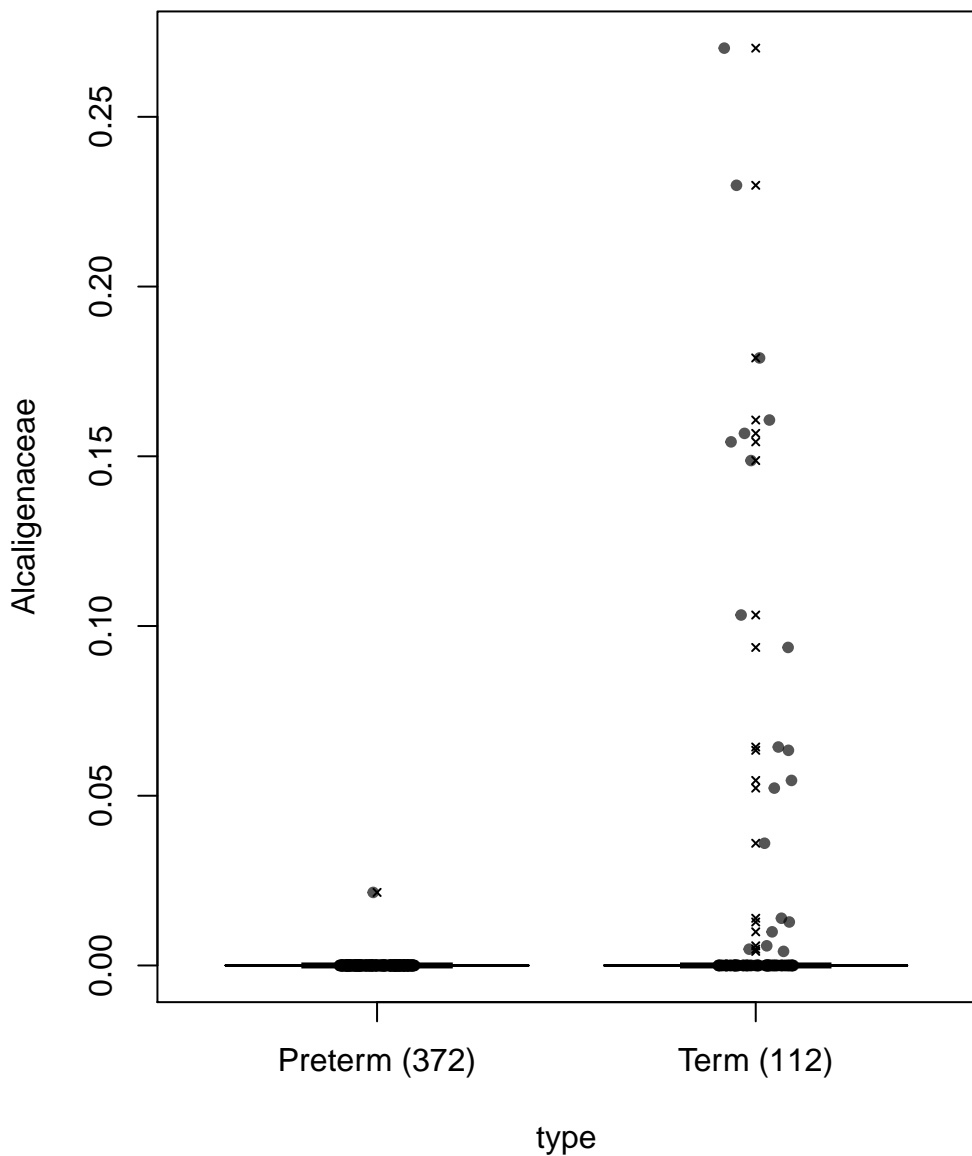

### Partial Residual Plot

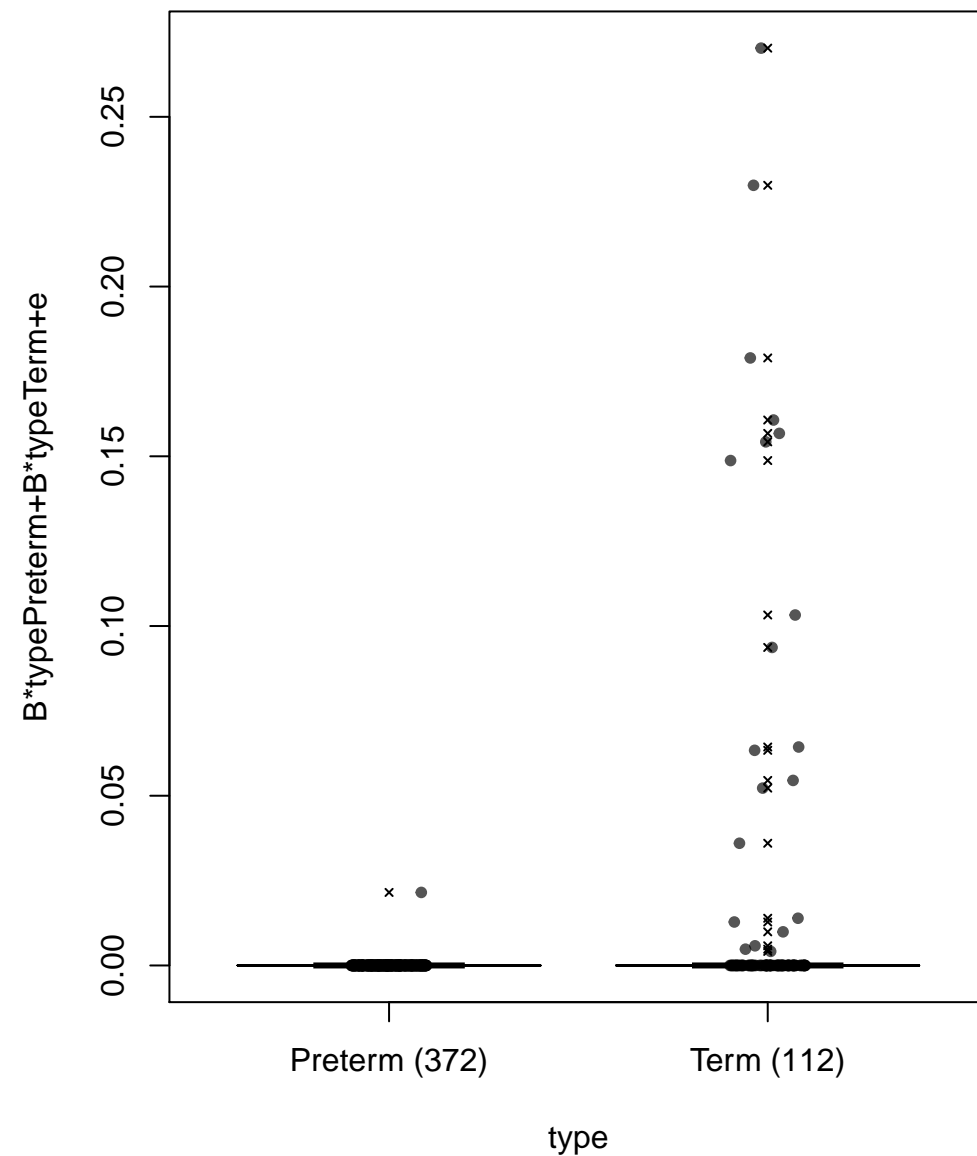

typeTerm (0.0174 sd 0.00303, p=1.48e-08, q=1.47e-07)

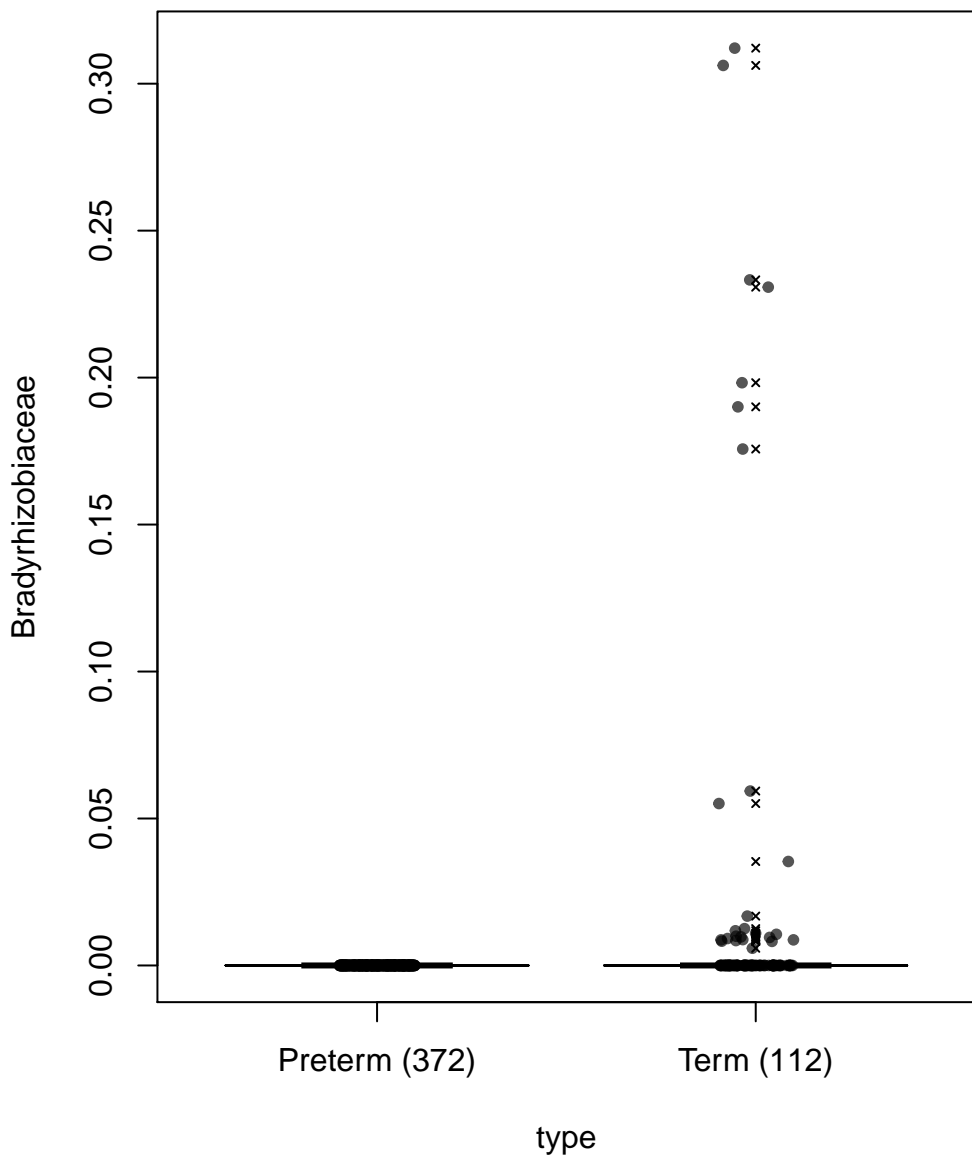

Partial Residual Plot

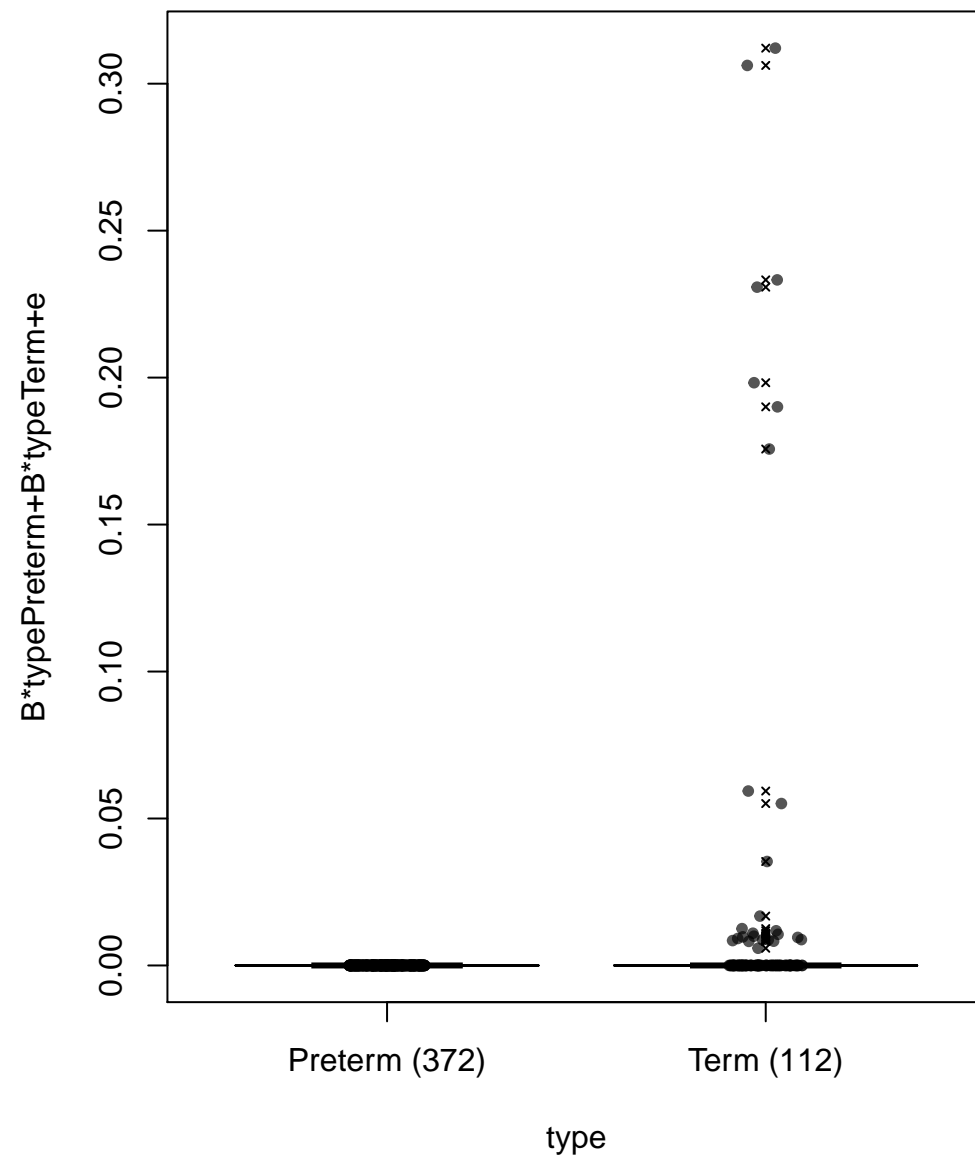

**typeTerm (0.0105 sd 0.00183, p=1.91e-08, q=1.75e-07)**

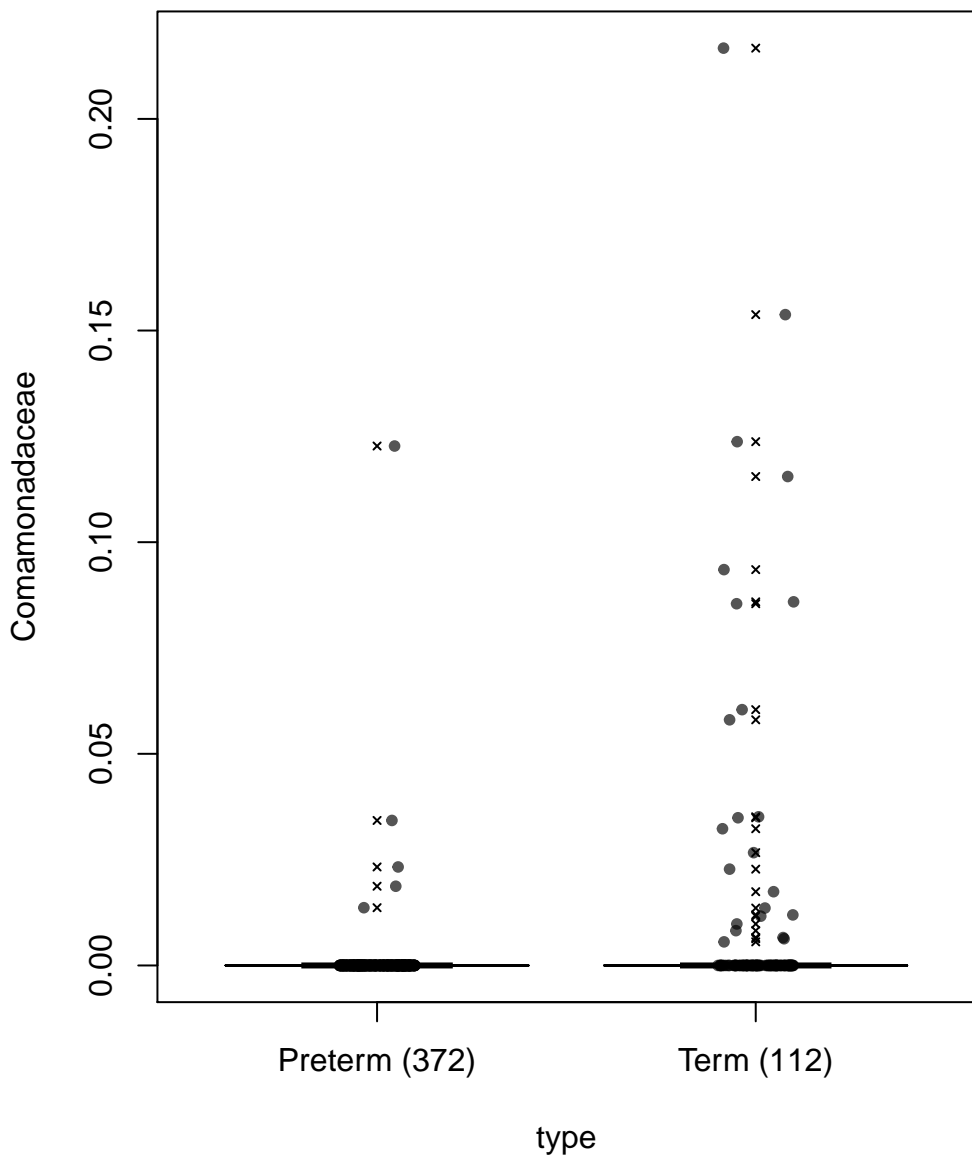

### Partial Residual Plot

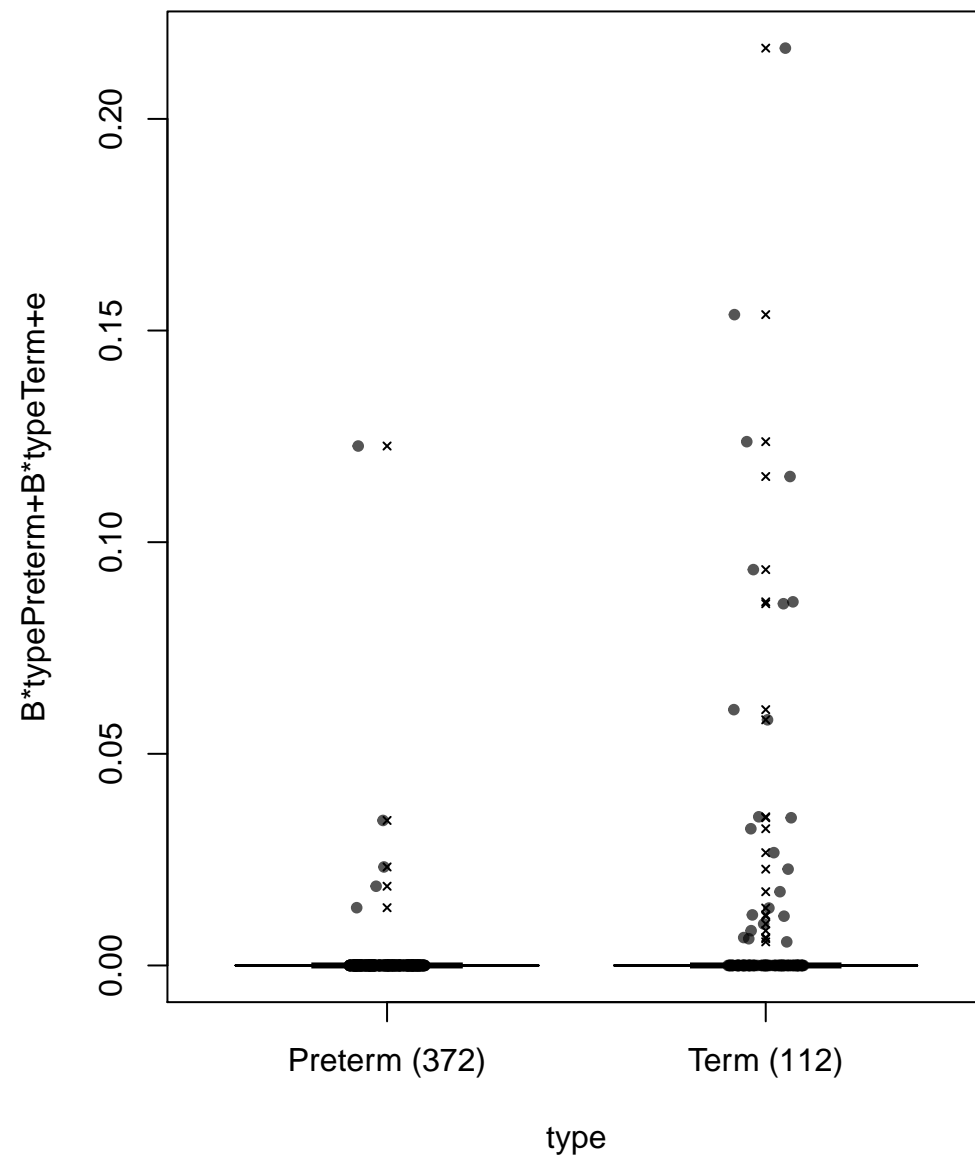

typeTerm (0.0553 sd 0.00988, p=3.81e-08, q=3.24e-07)

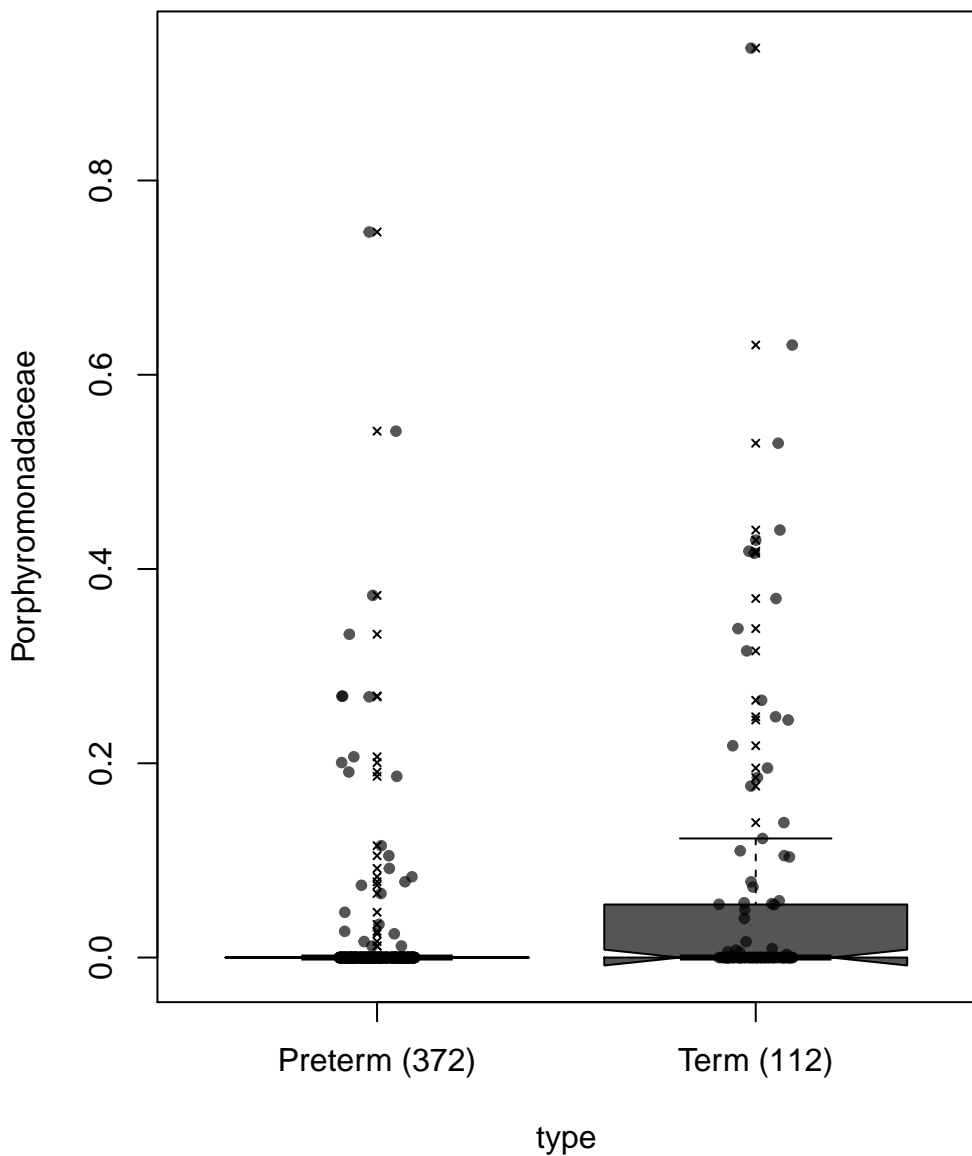

Partial Residual Plot

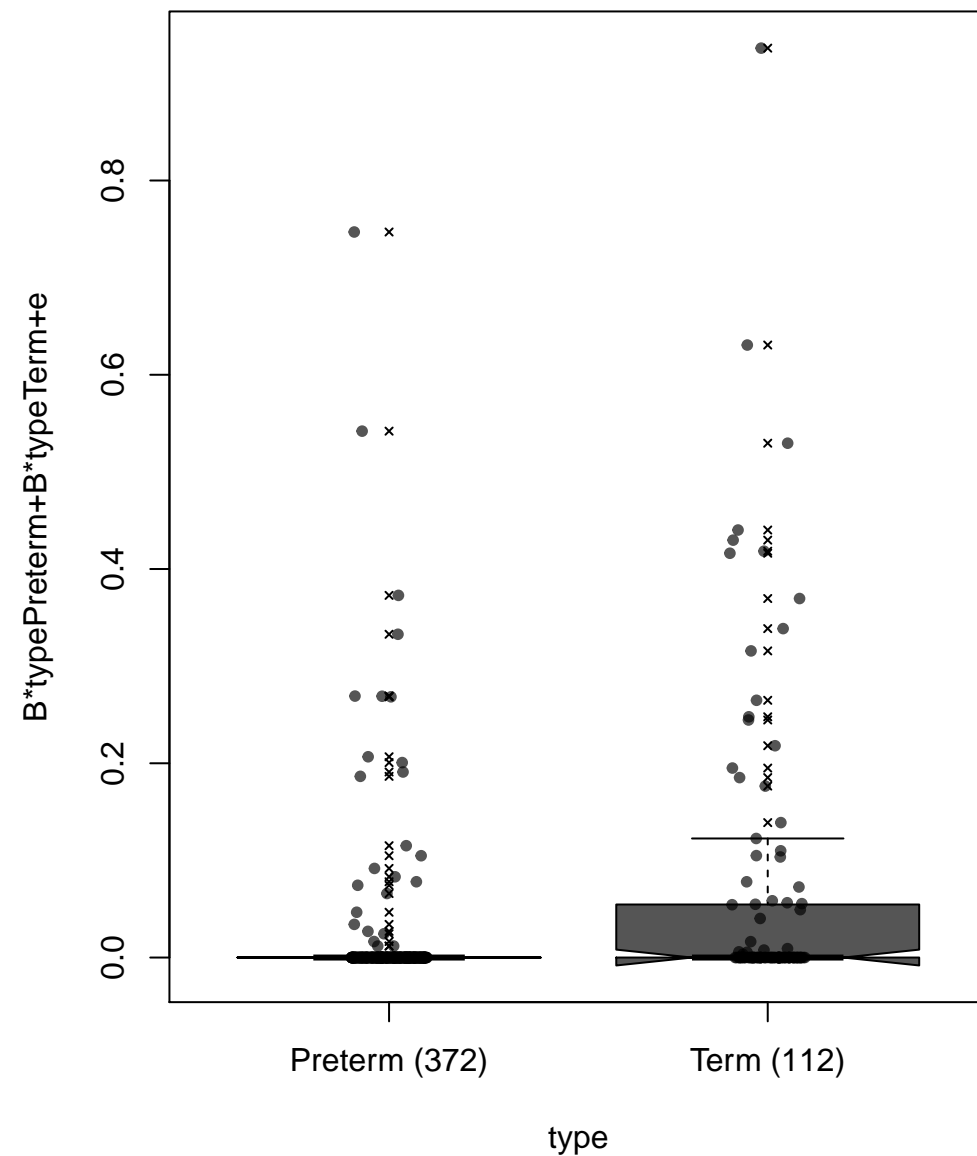

typeTerm (0.0171 sd 0.00317, p=9.74e-08, q=7.73e-07)

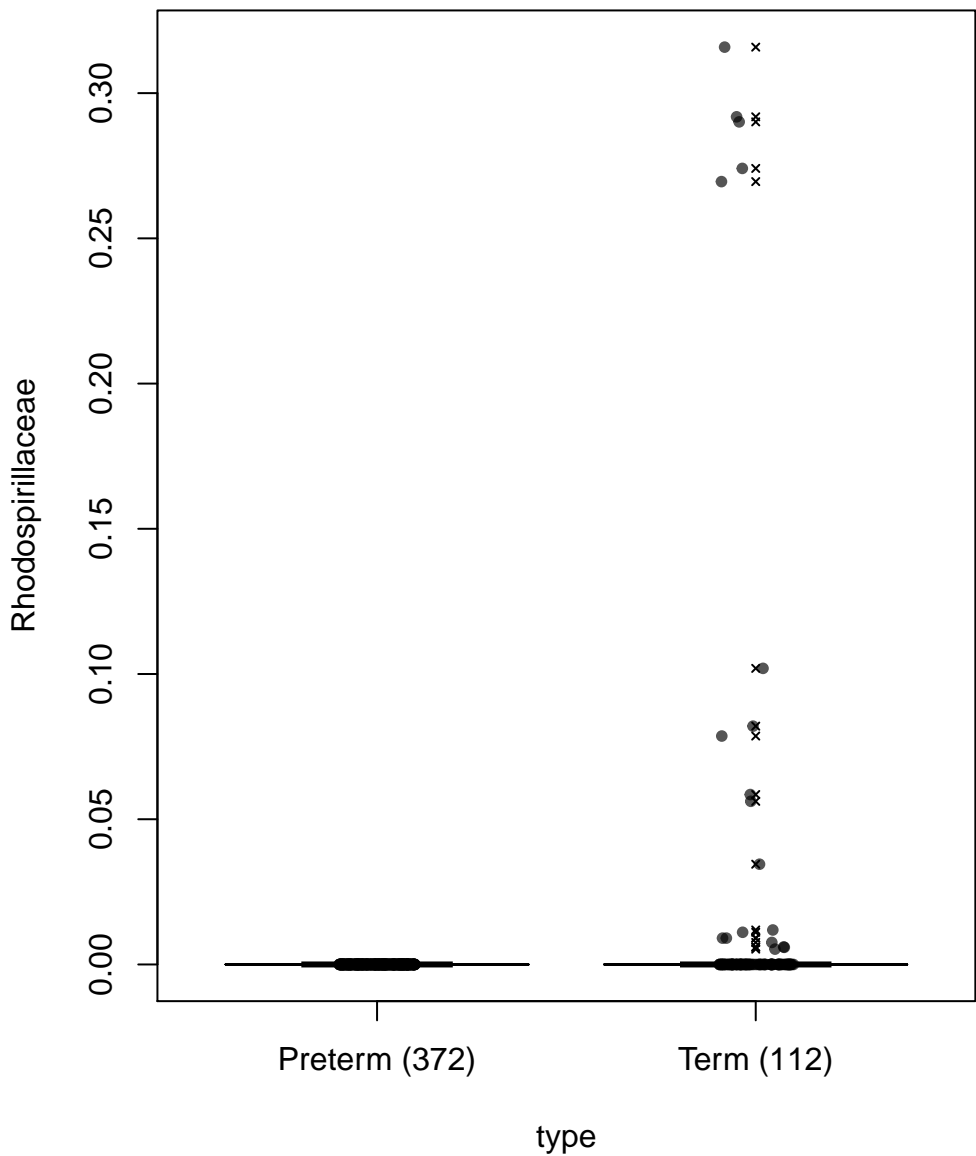

Partial Residual Plot

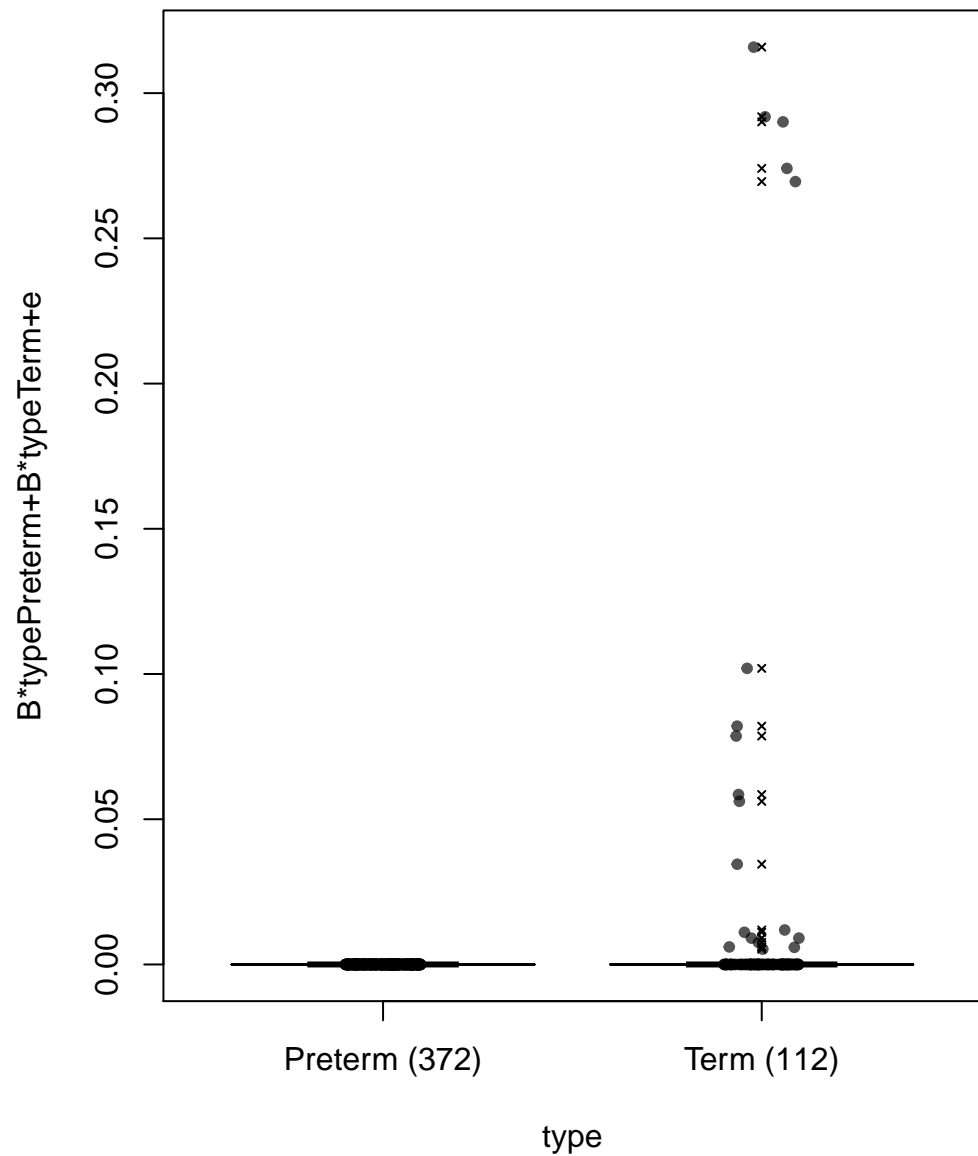



typeTerm (0.0232 sd 0.00441, p=2.22e-07, q=1.65e-06)

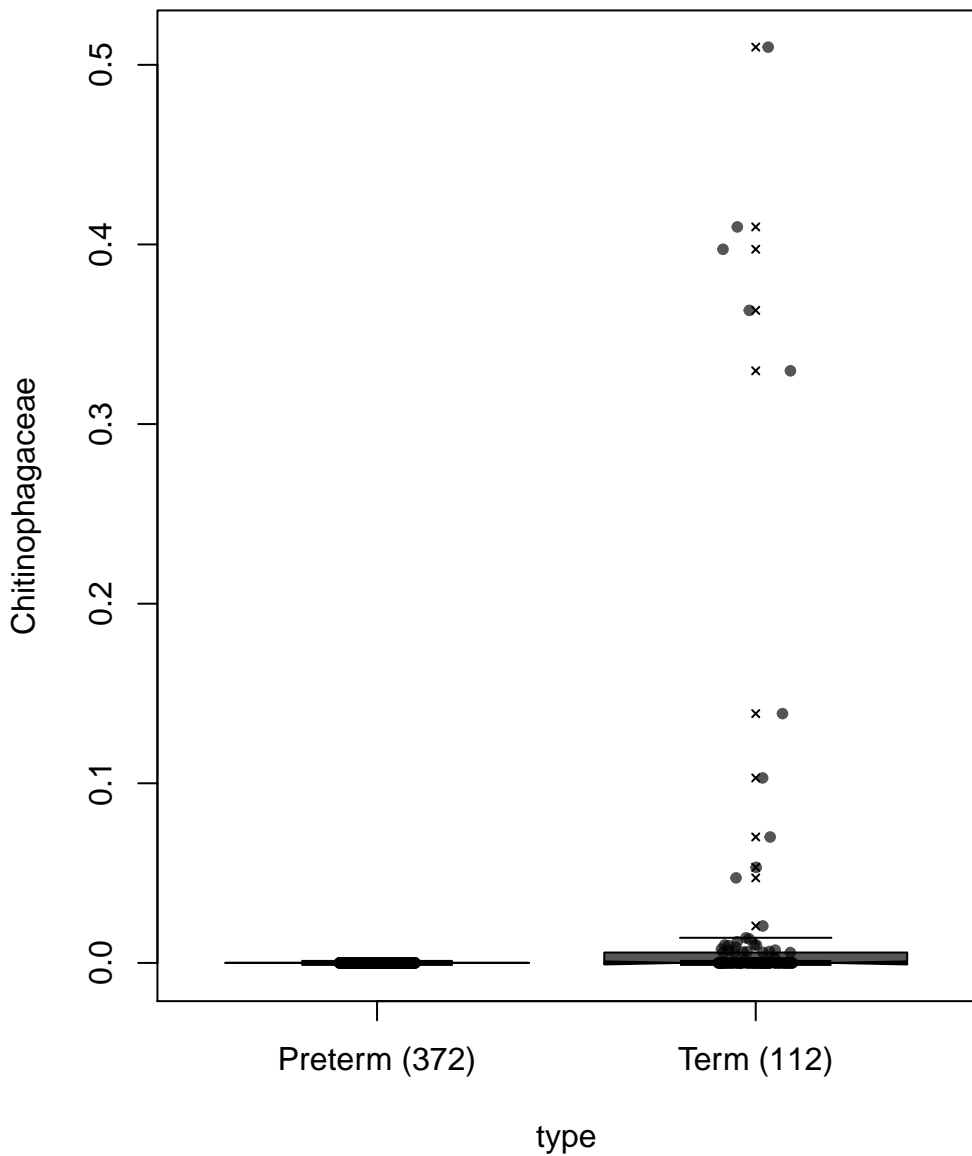

Partial Residual Plot

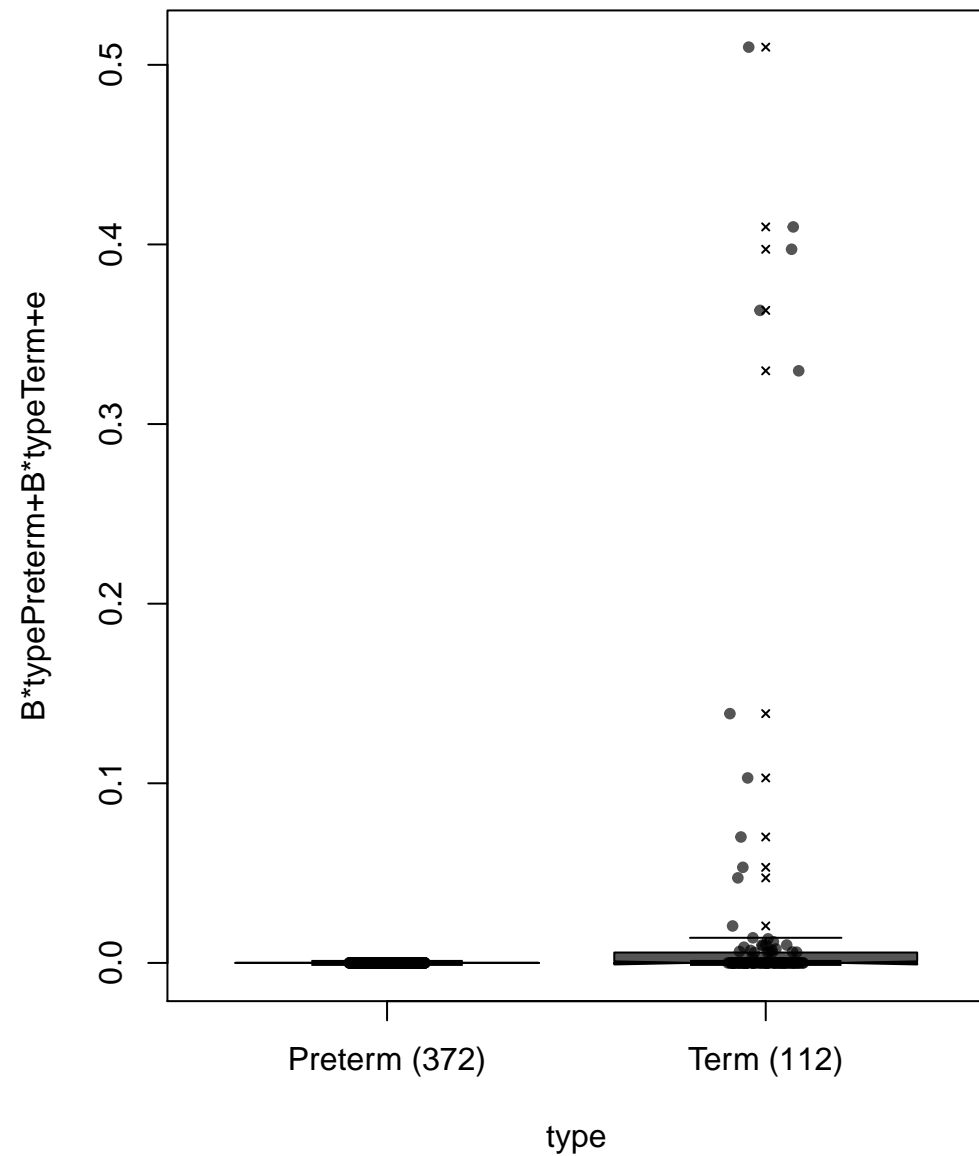

typeTerm (0.0333 sd 0.00664, p=7.54e-07, q=5.28e-06)

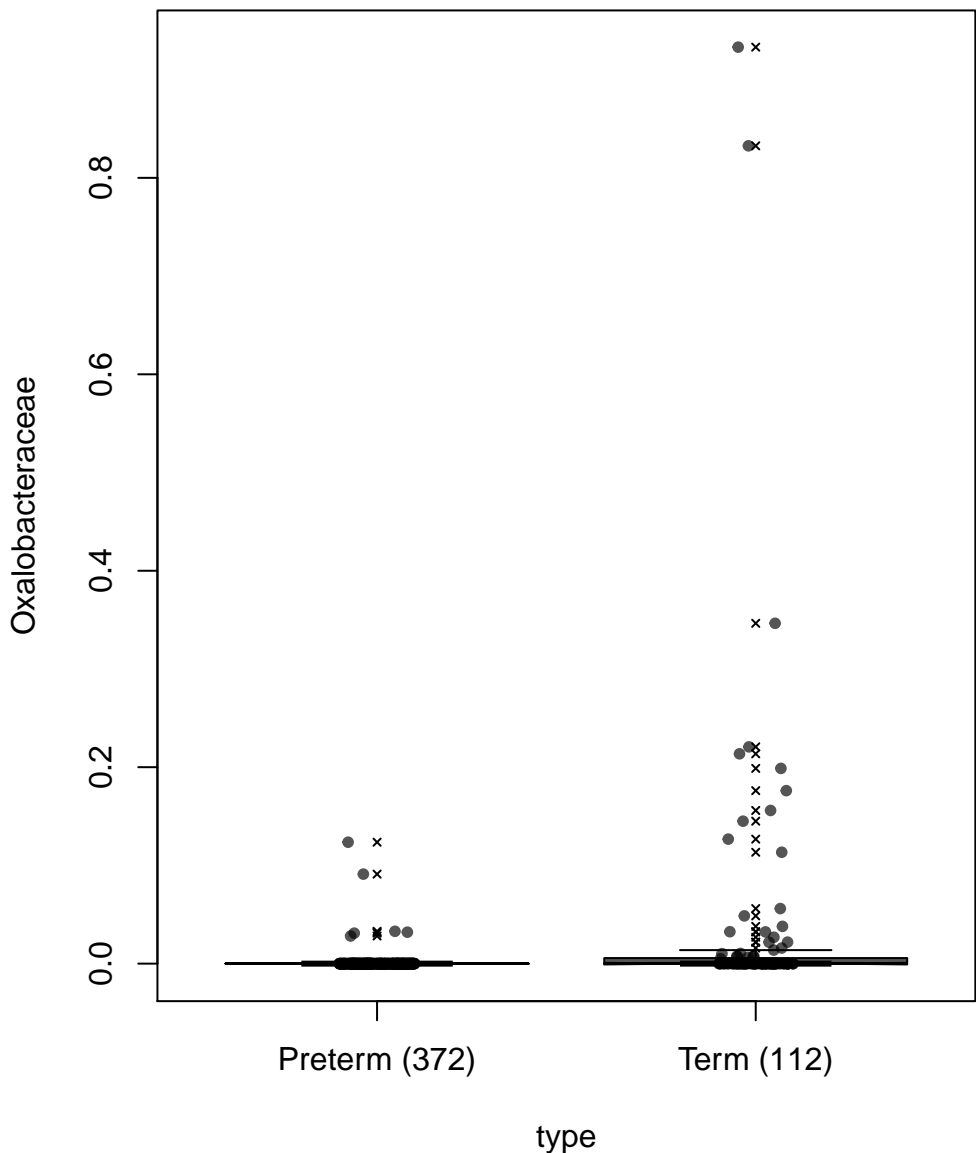

Partial Residual Plot

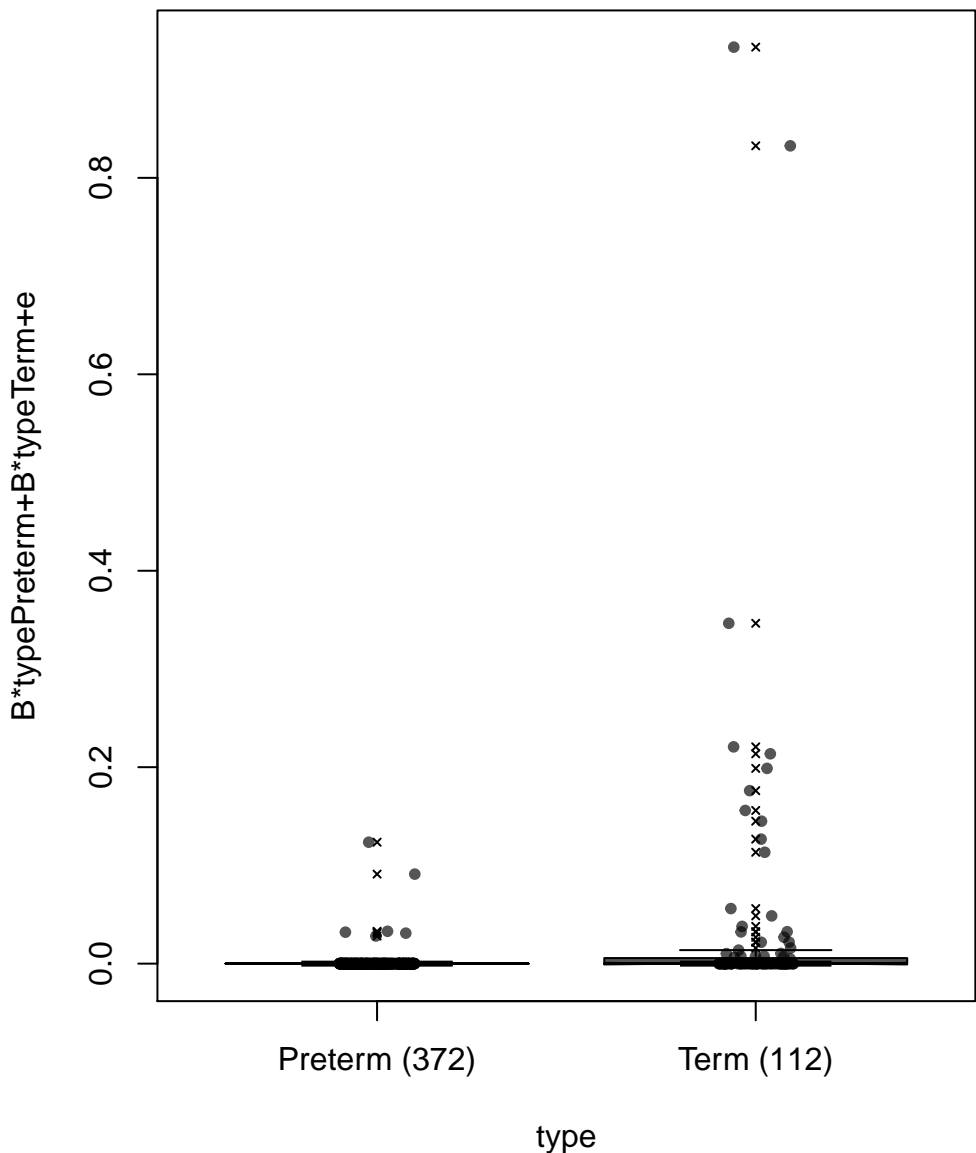

typeTerm (0.0158 sd 0.00336, p=3.14e-06, q=2.08e-05)

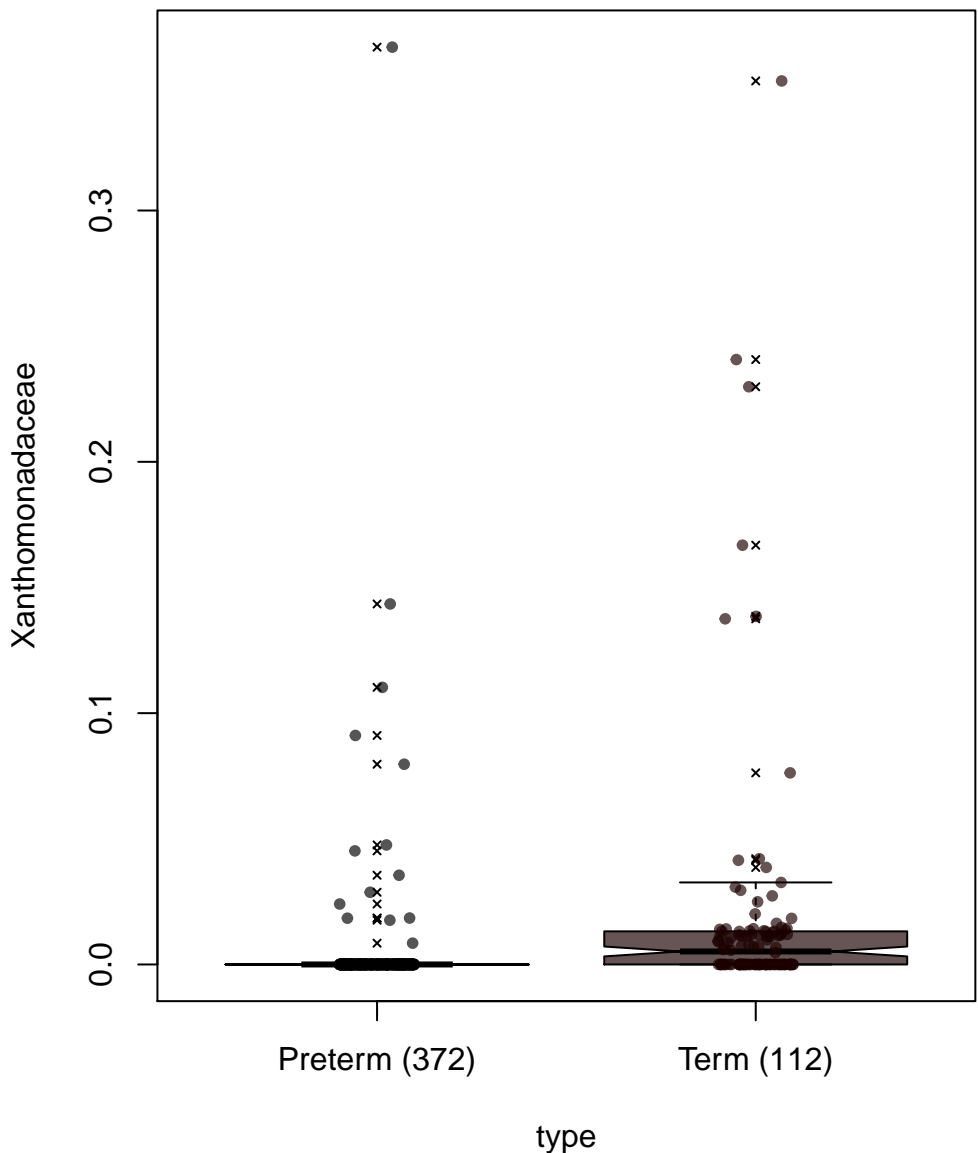

Partial Residual Plot

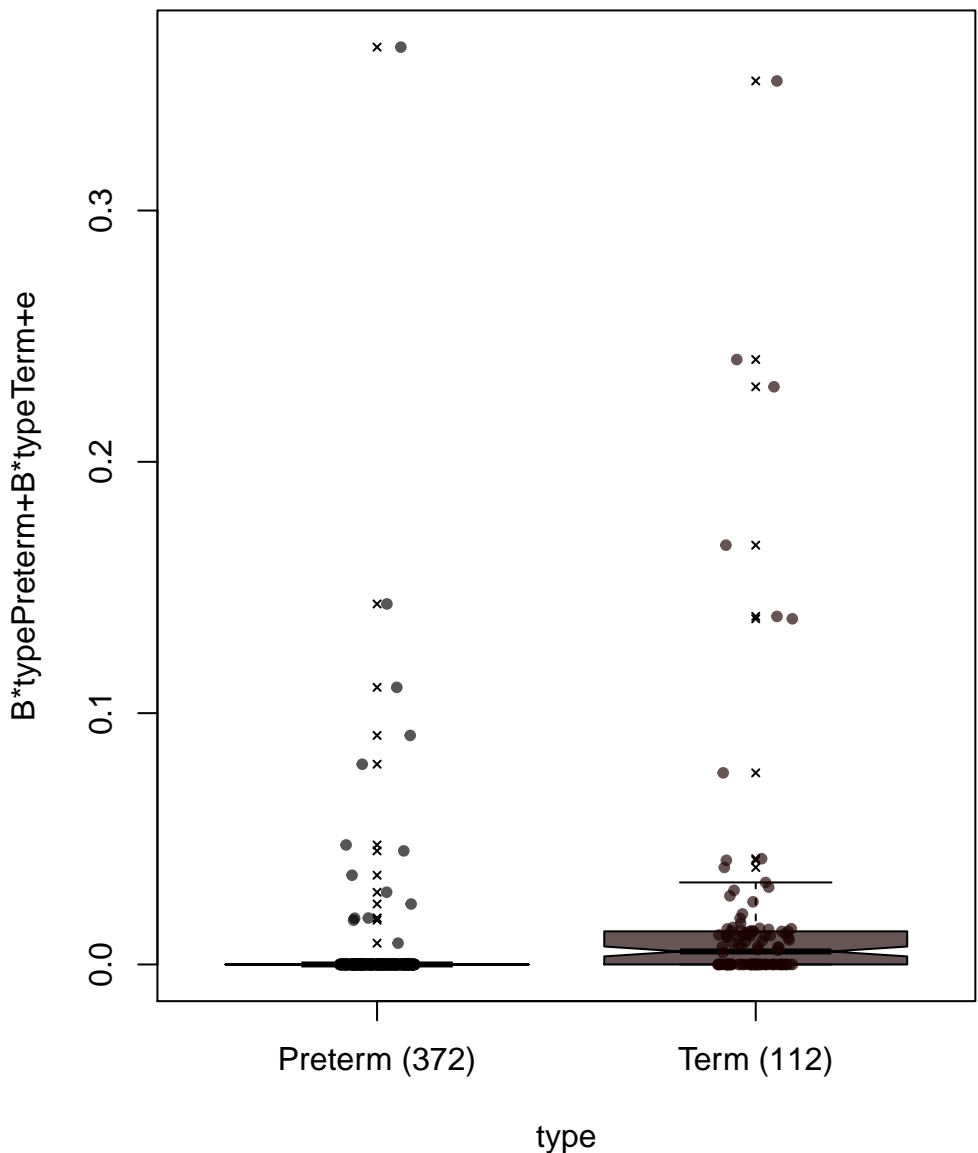

**typeTerm (0.0083 sd 0.00177, p=3.73e-06, q=2.34e-05)**

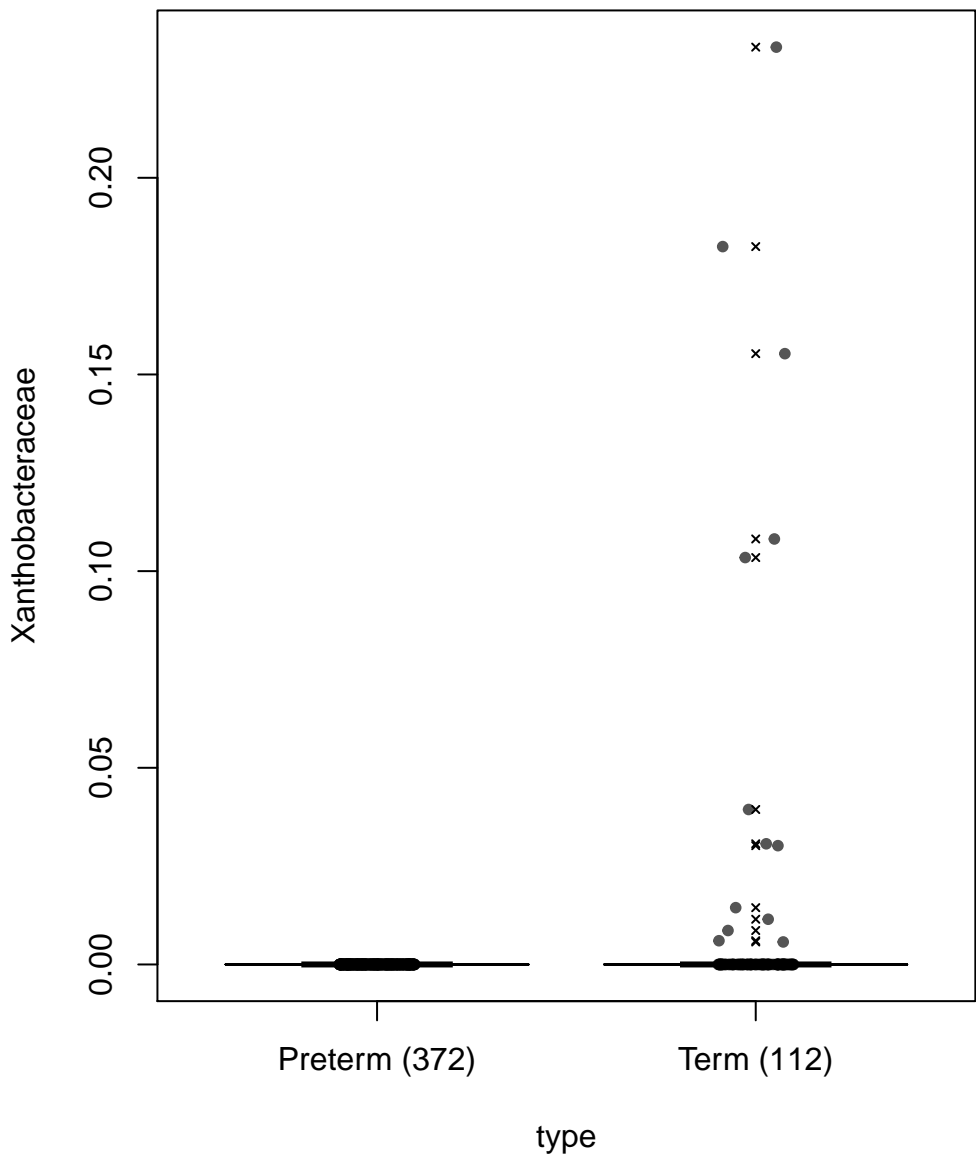

### Partial Residual Plot

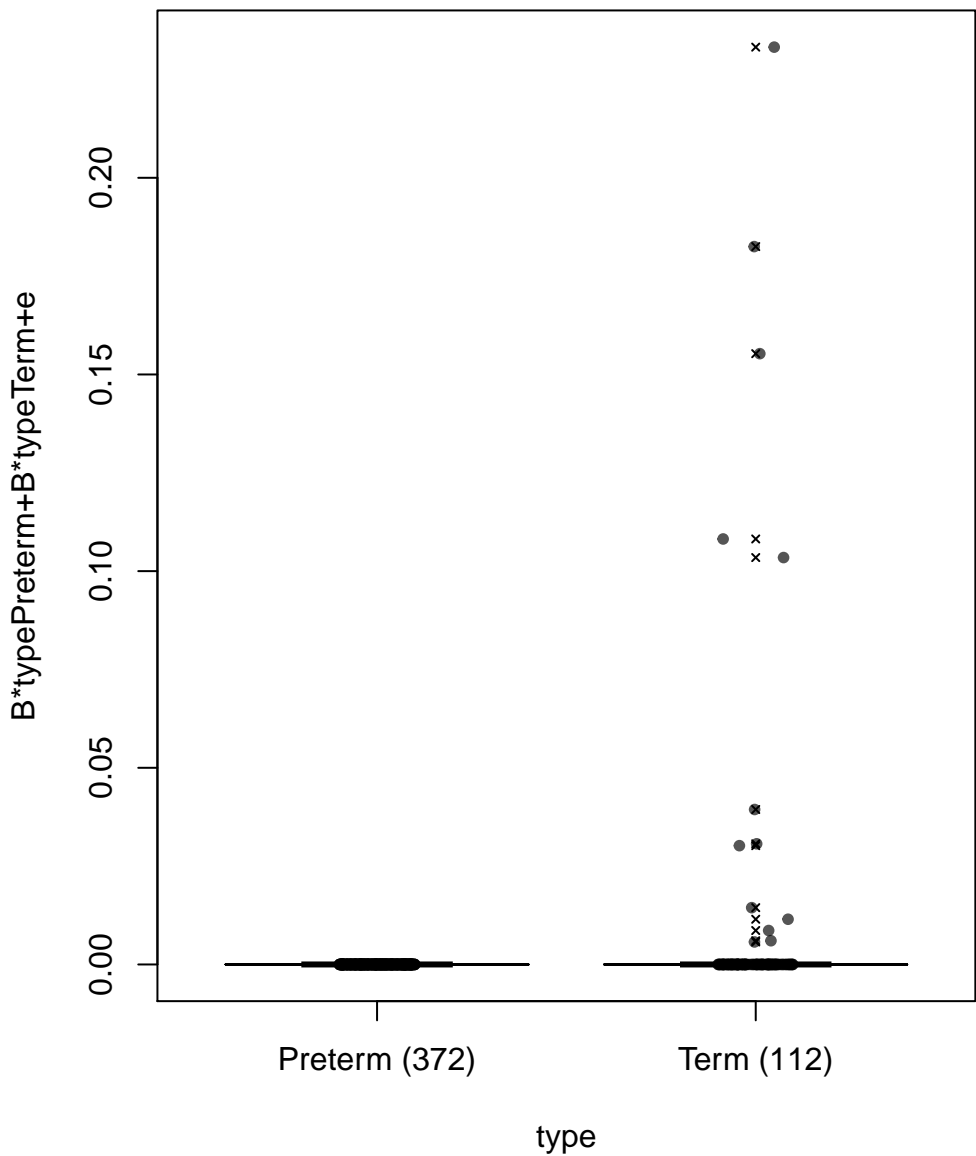

typeTerm (0.0208 sd 0.00462, p=8.68e-06, q=5.16e-05)

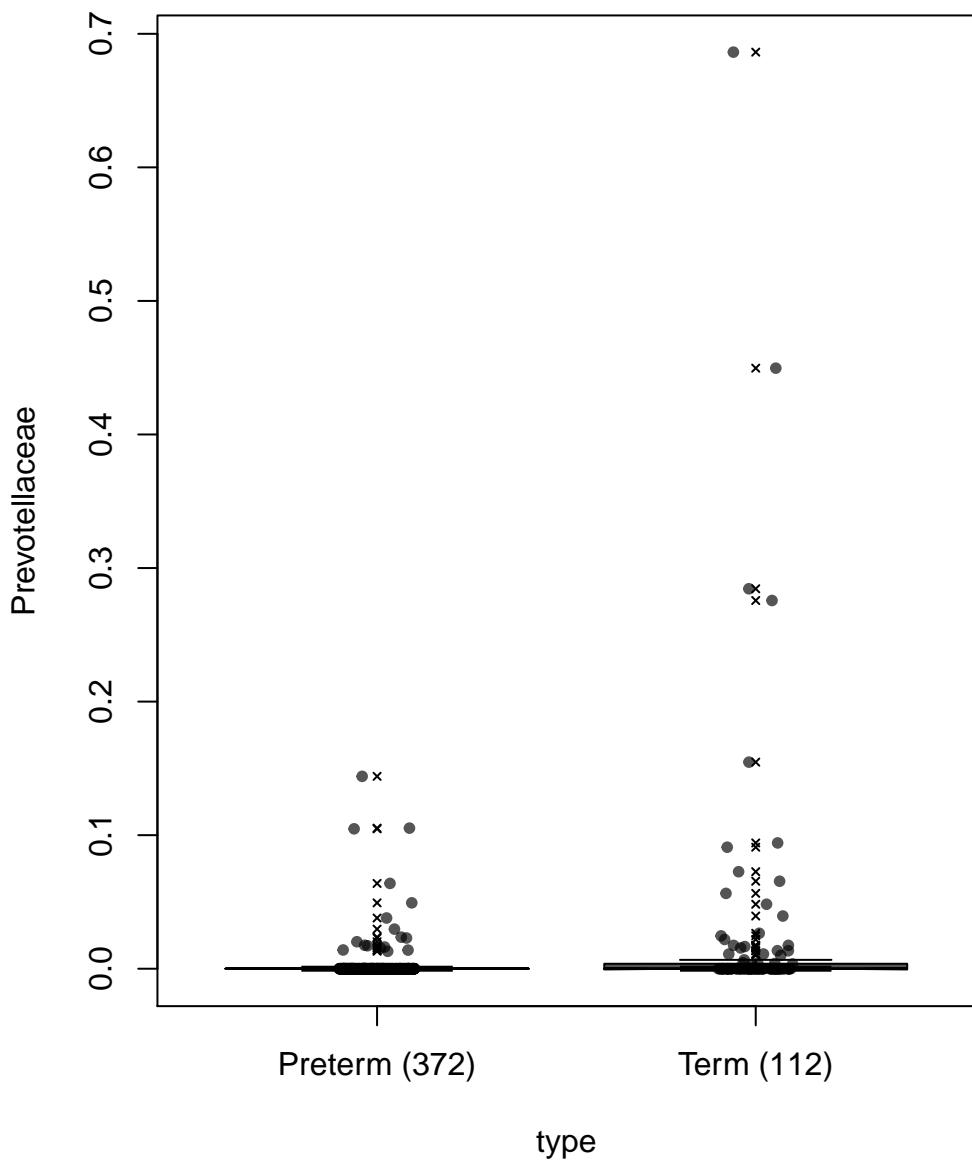

Partial Residual Plot

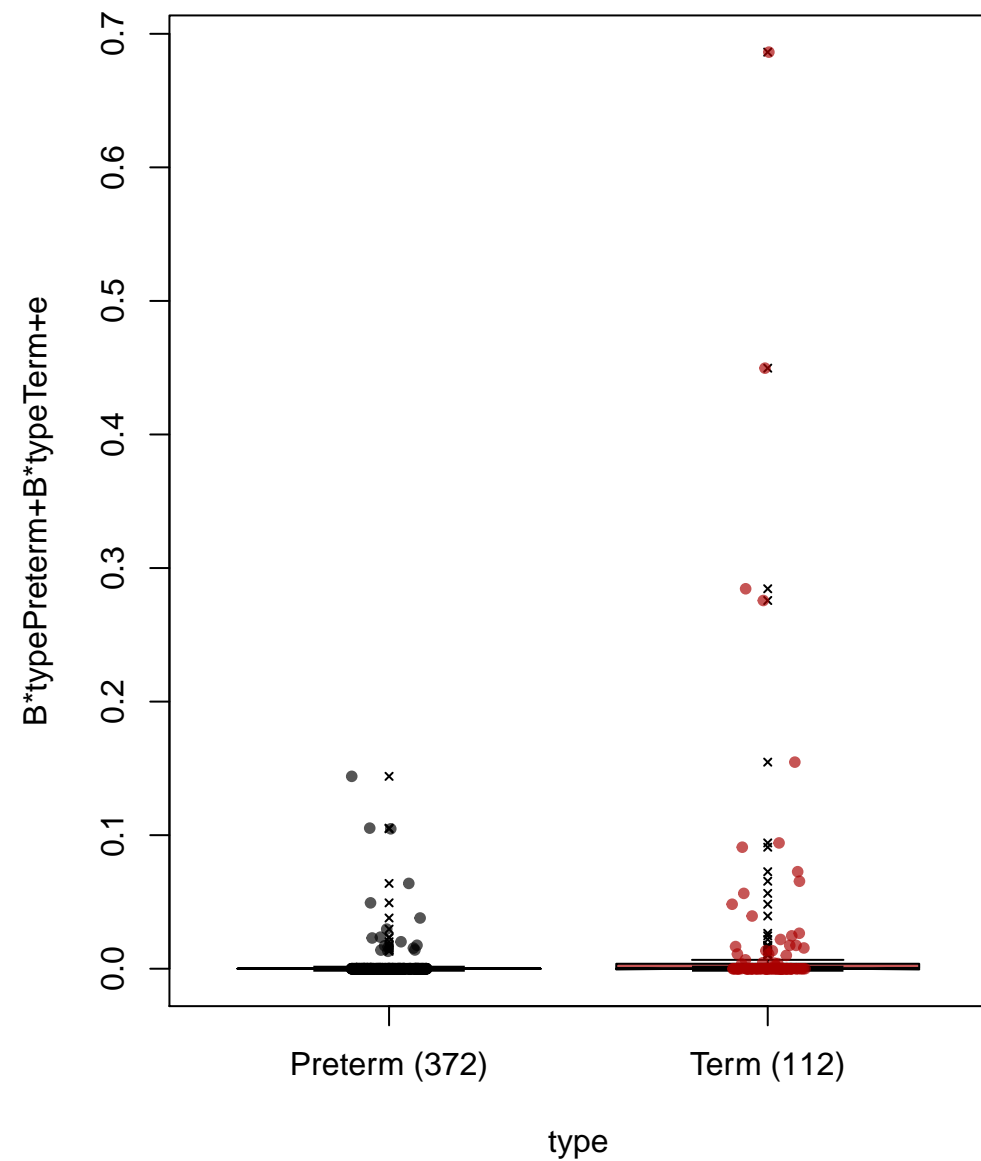

typeTerm (0.114 sd 0.0264, p=2.11e-05, q=0.000114)

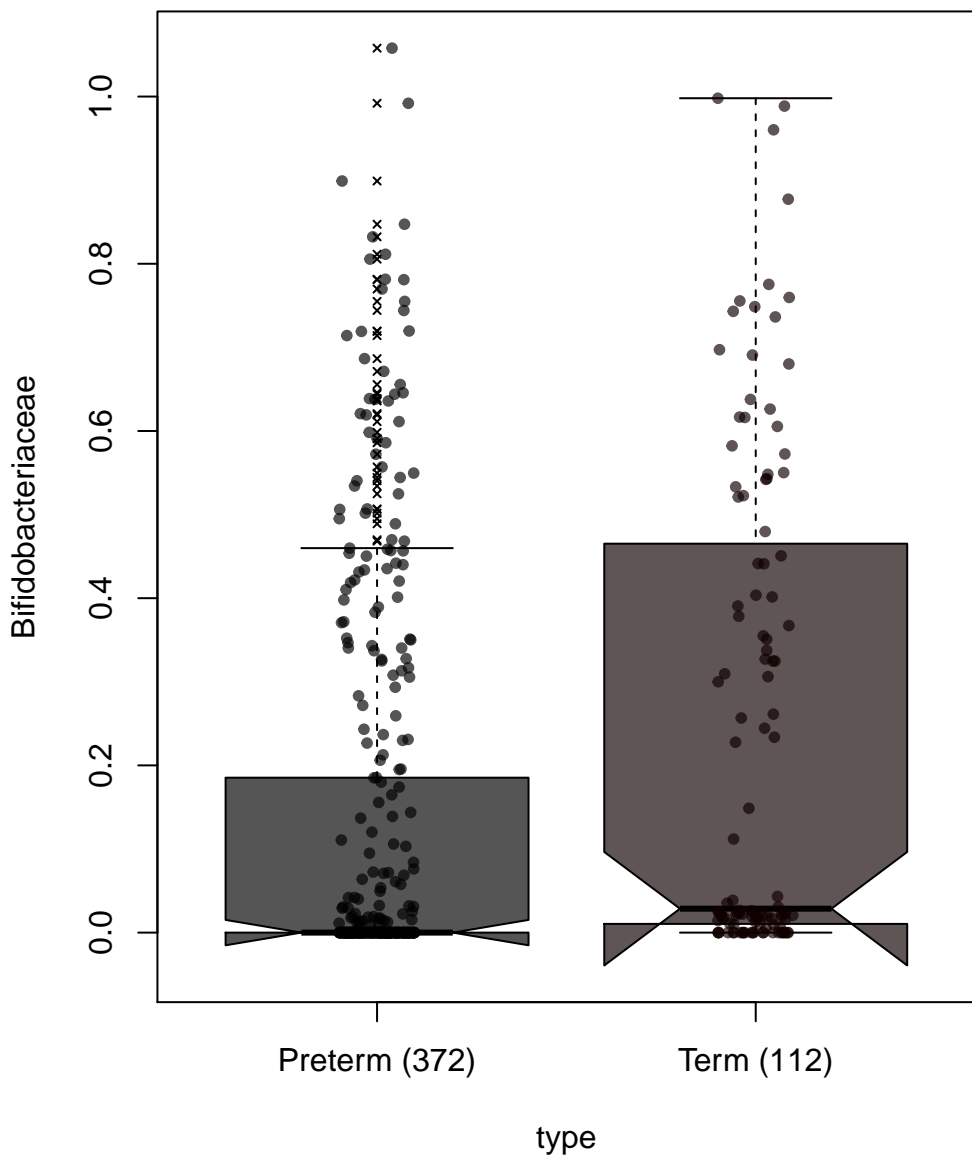

Partial Residual Plot

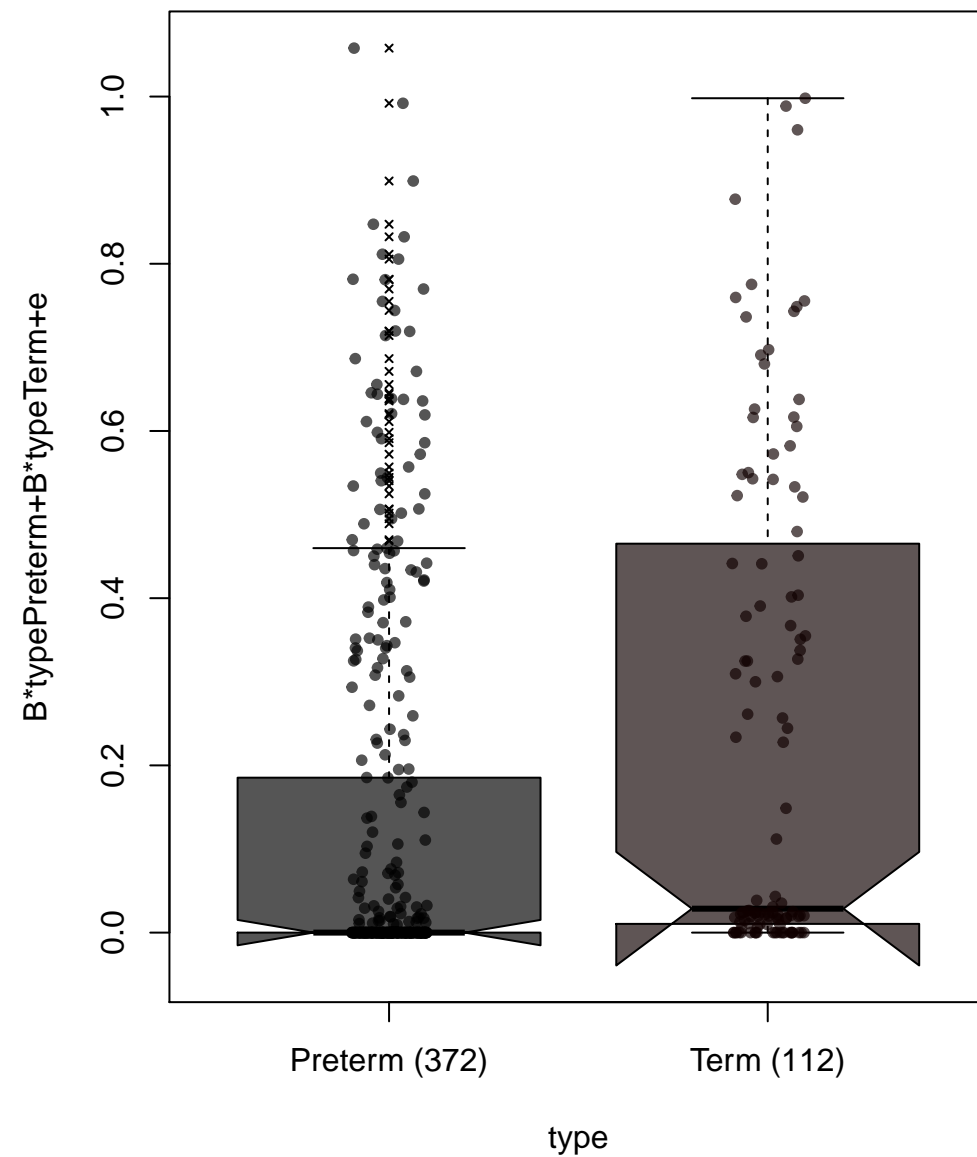

typeTerm (0.00395 sd 0.000919, p=2.11e-05, q=0.000114)

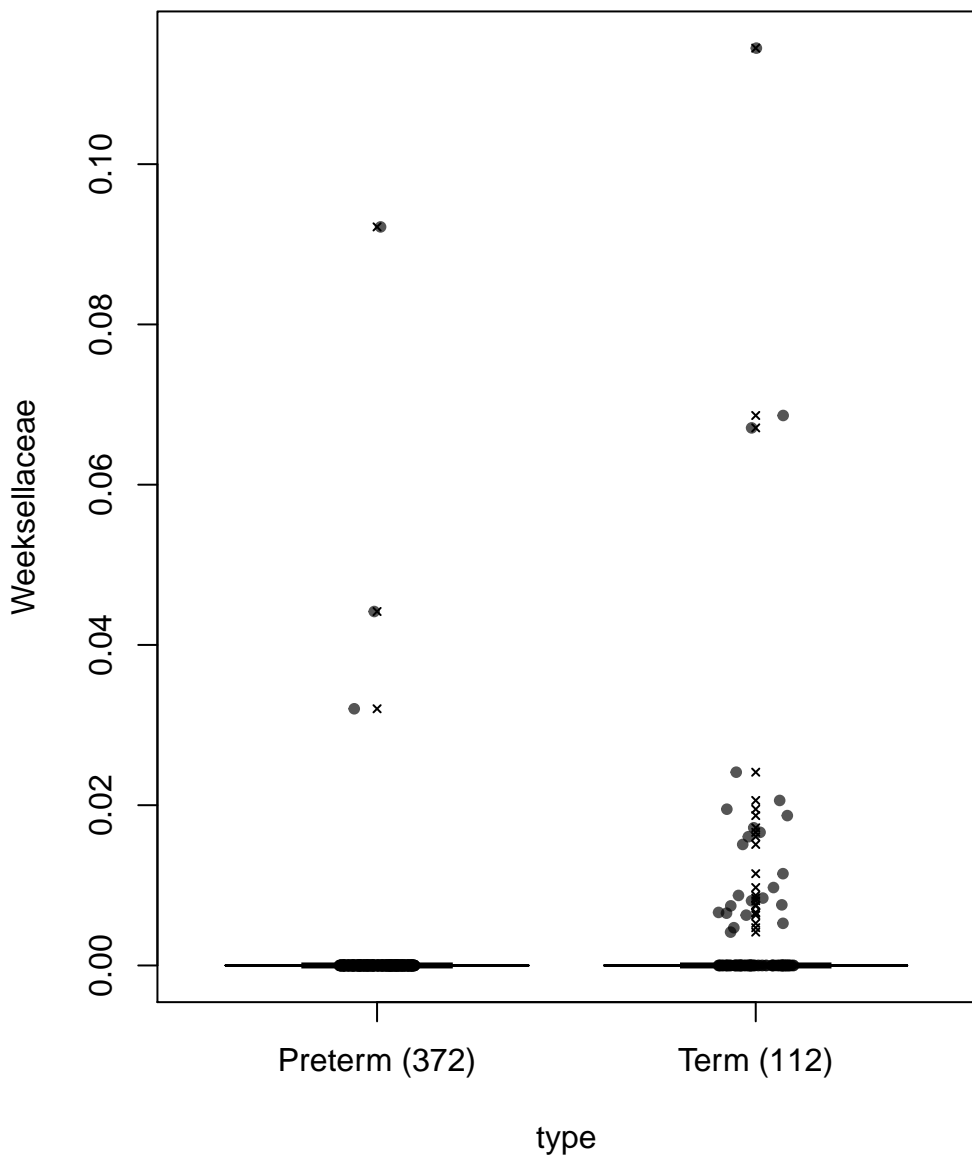

Partial Residual Plot

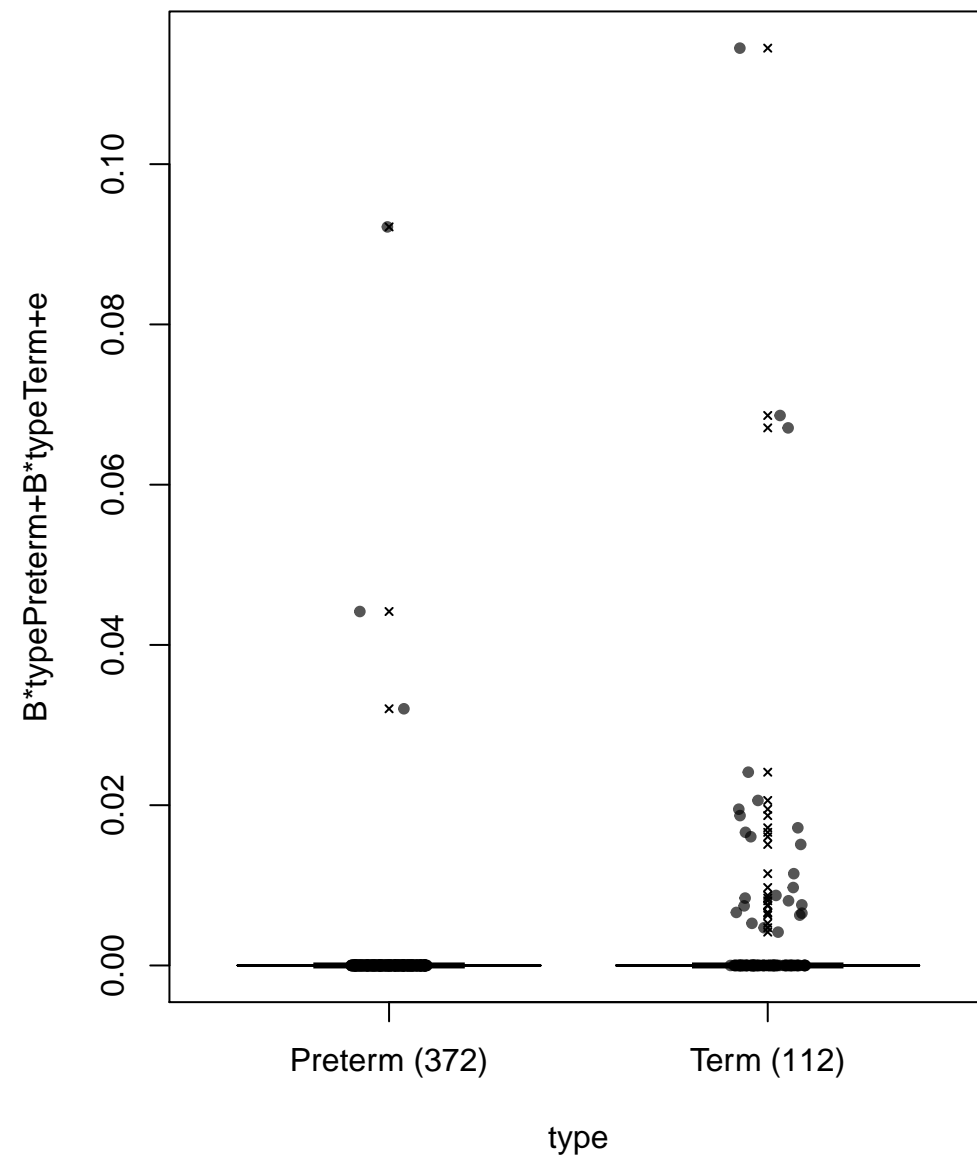

typeTerm (0.00176 sd 0.000412, p=2.28e-05, q=0.000118)

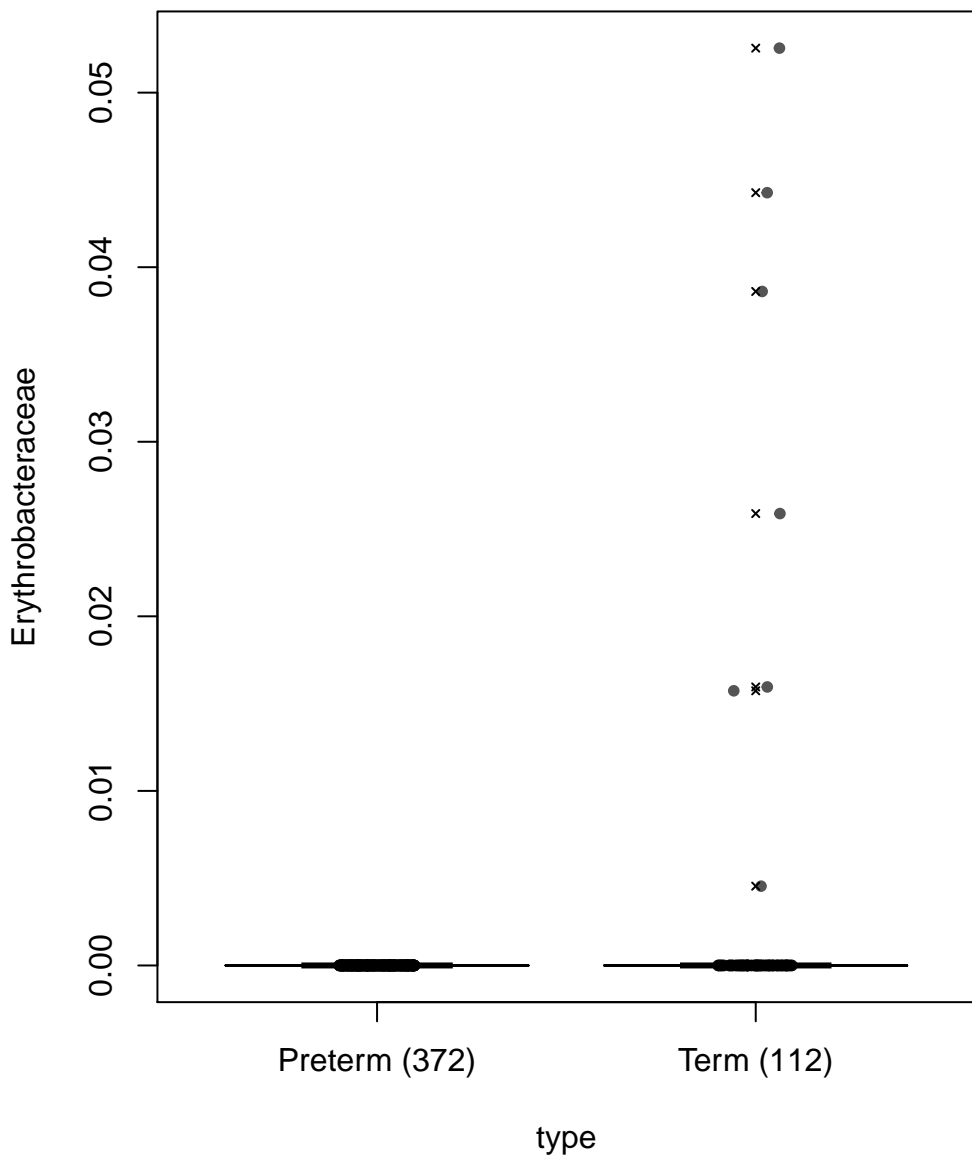

Partial Residual Plot

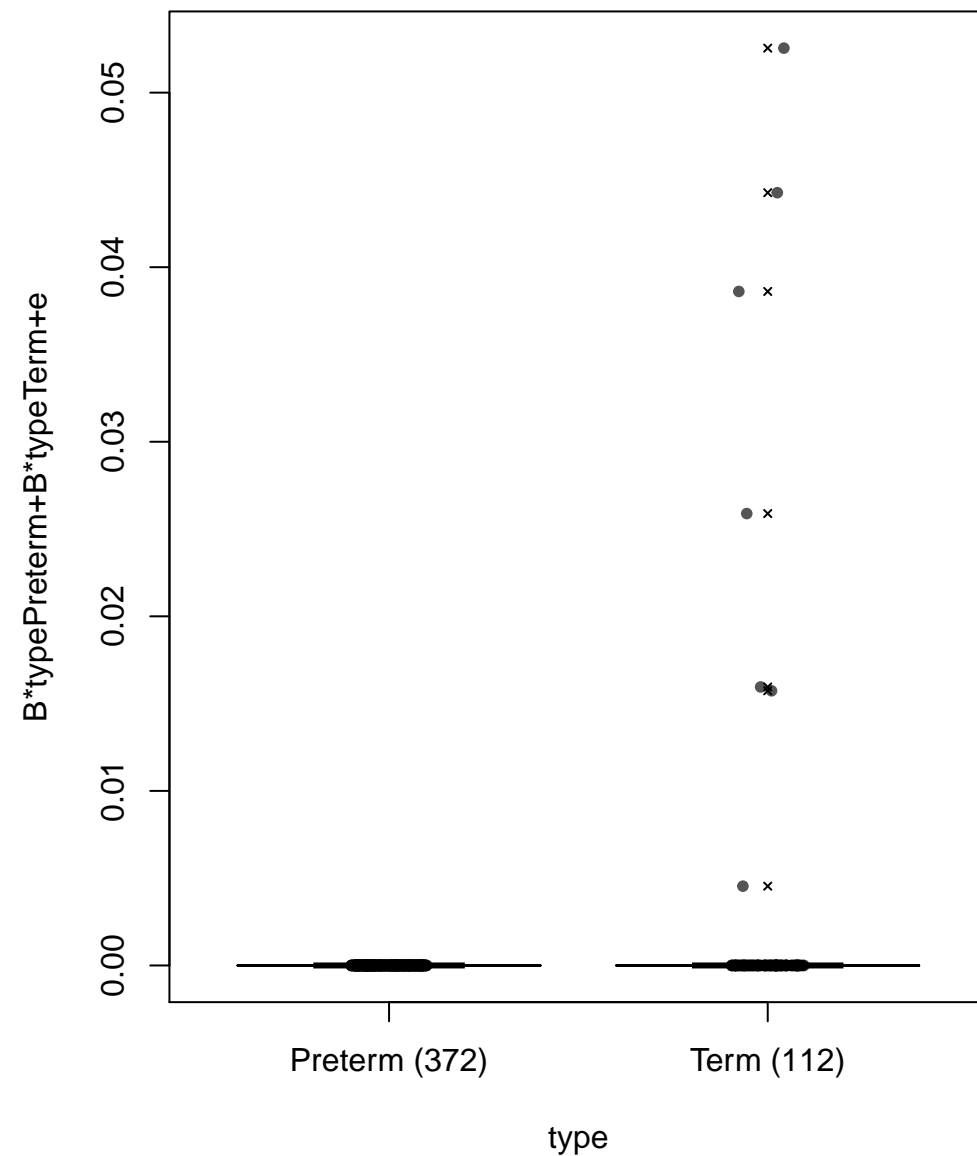



**typeTerm (0.0109 sd 0.00261, p=3.85e-05, q=0.000191)**

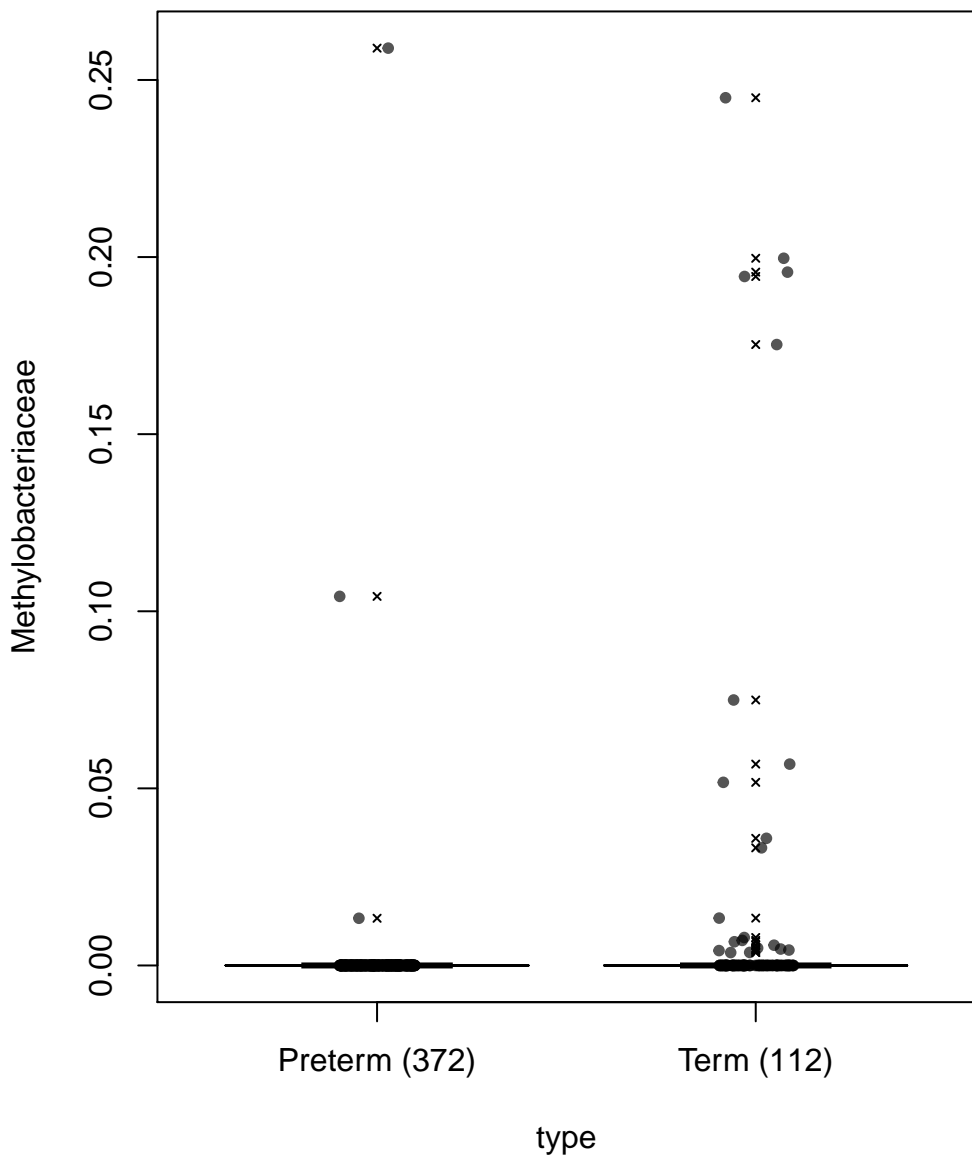

### Partial Residual Plot

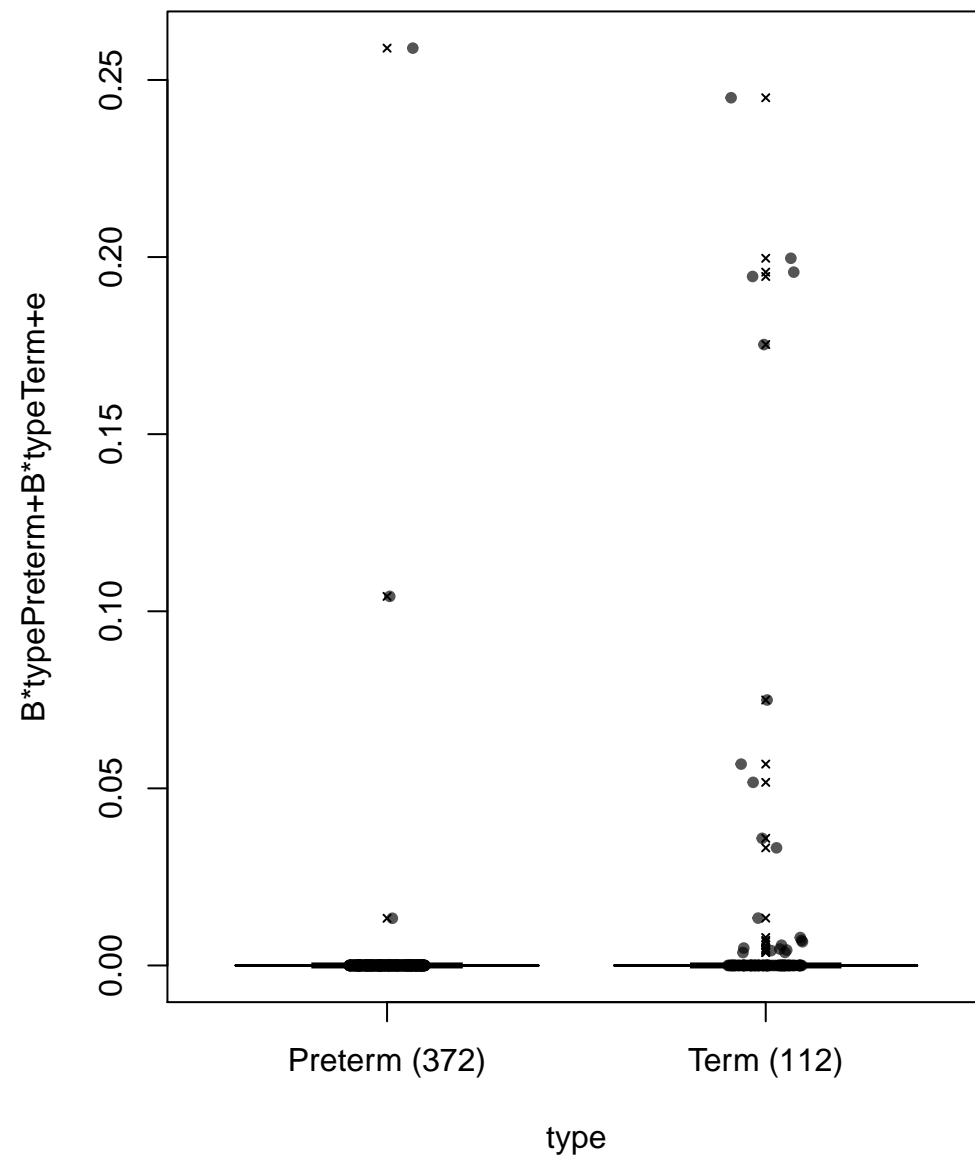

typeTerm (0.00476 sd 0.00124, p=0.00013, q=0.000621)

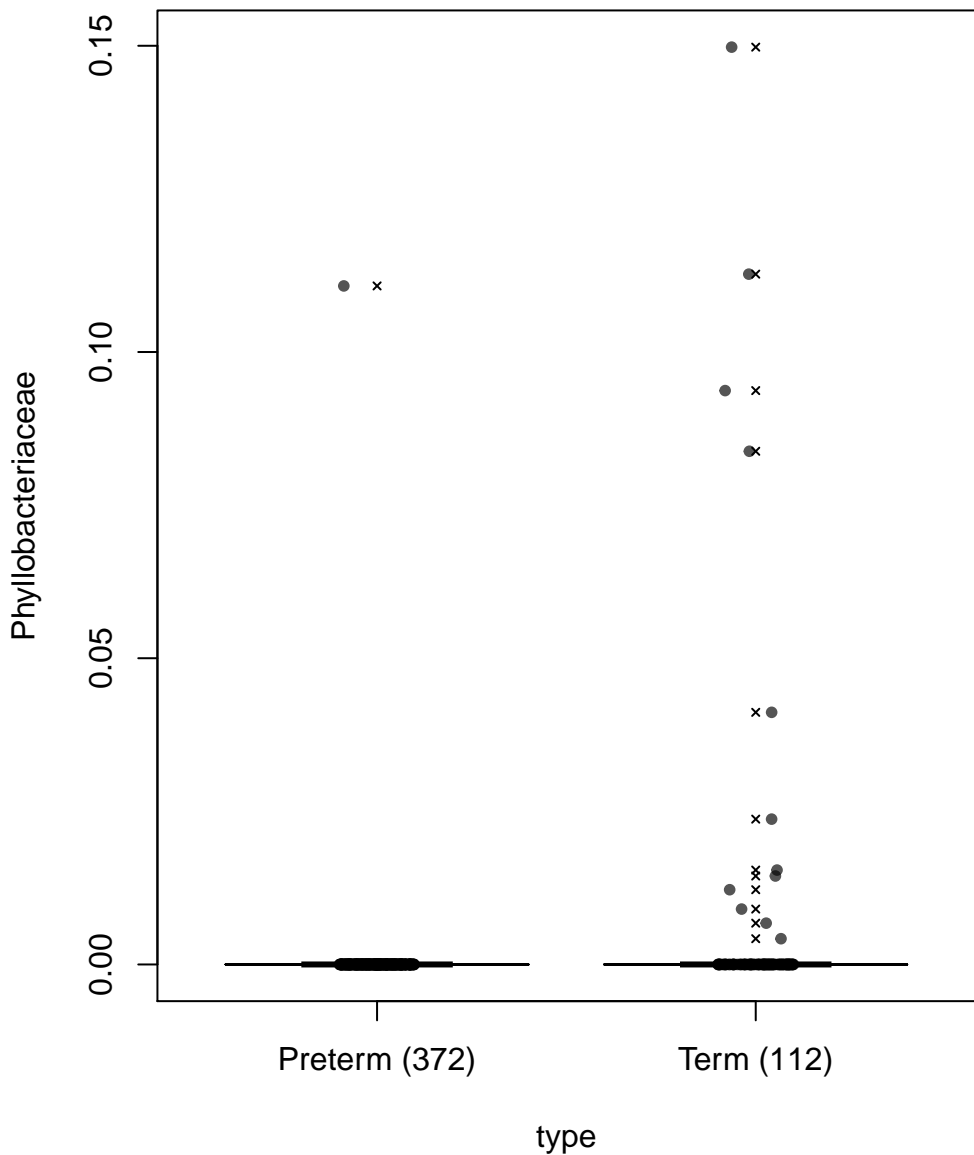

Partial Residual Plot

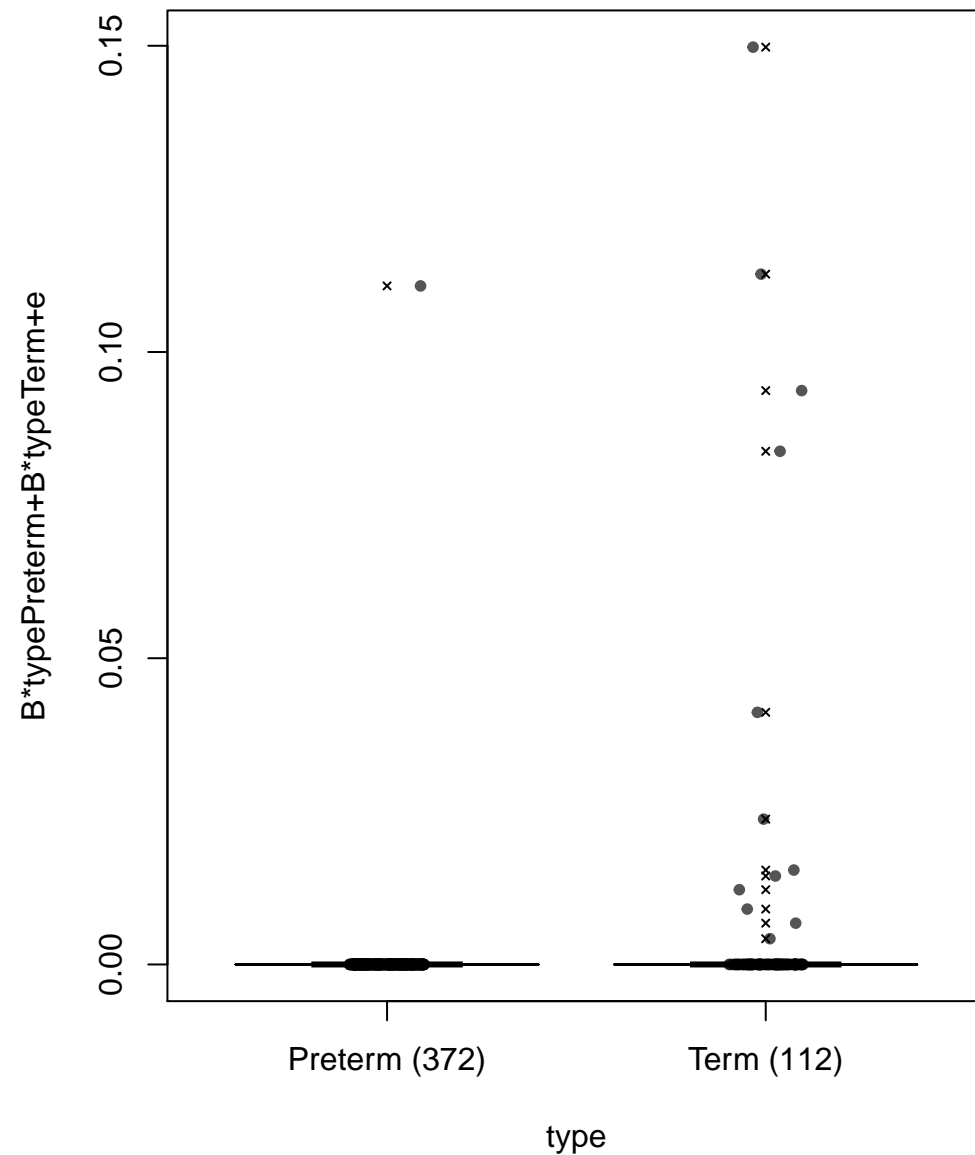

typeTerm (0.0251 sd 0.00669, p=0.000195, q=0.000894)

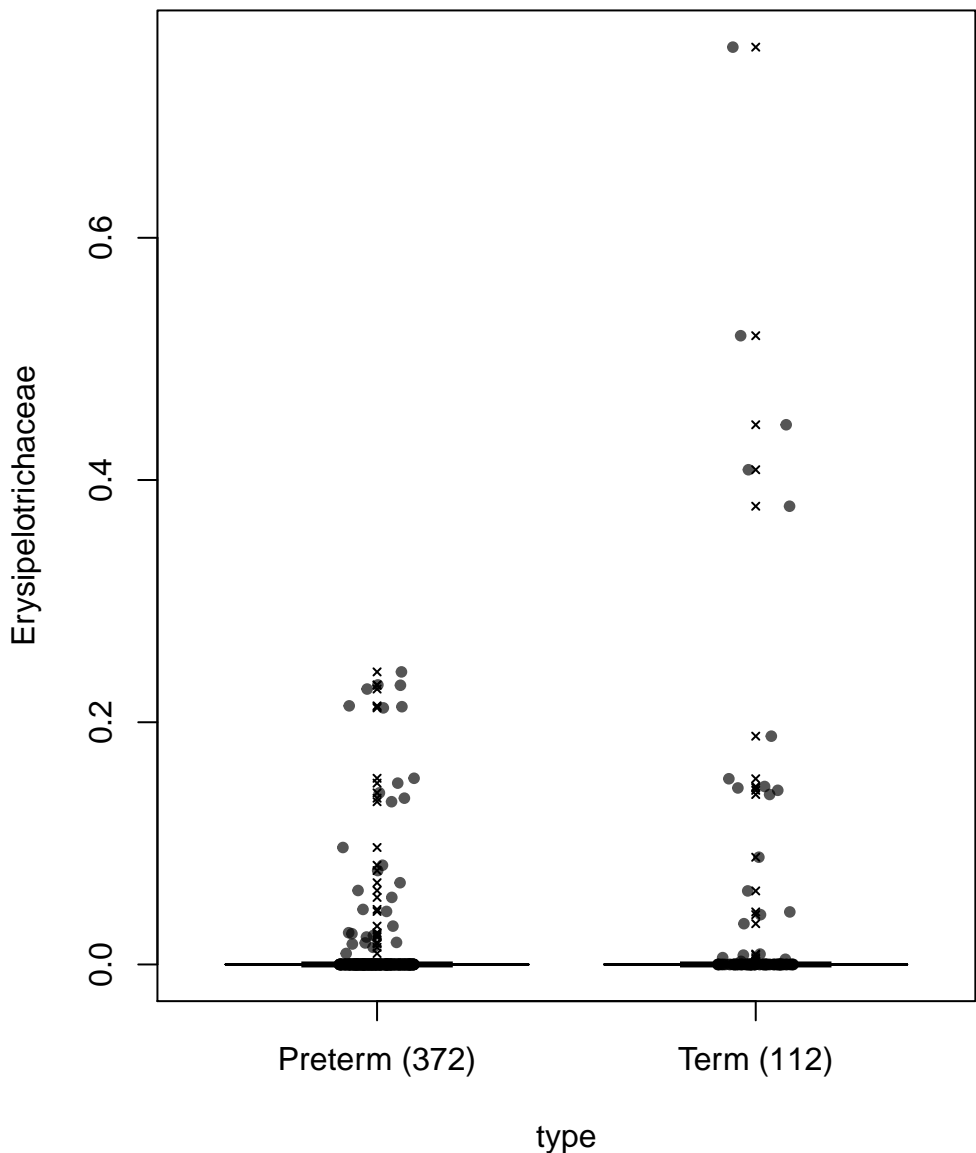

Partial Residual Plot

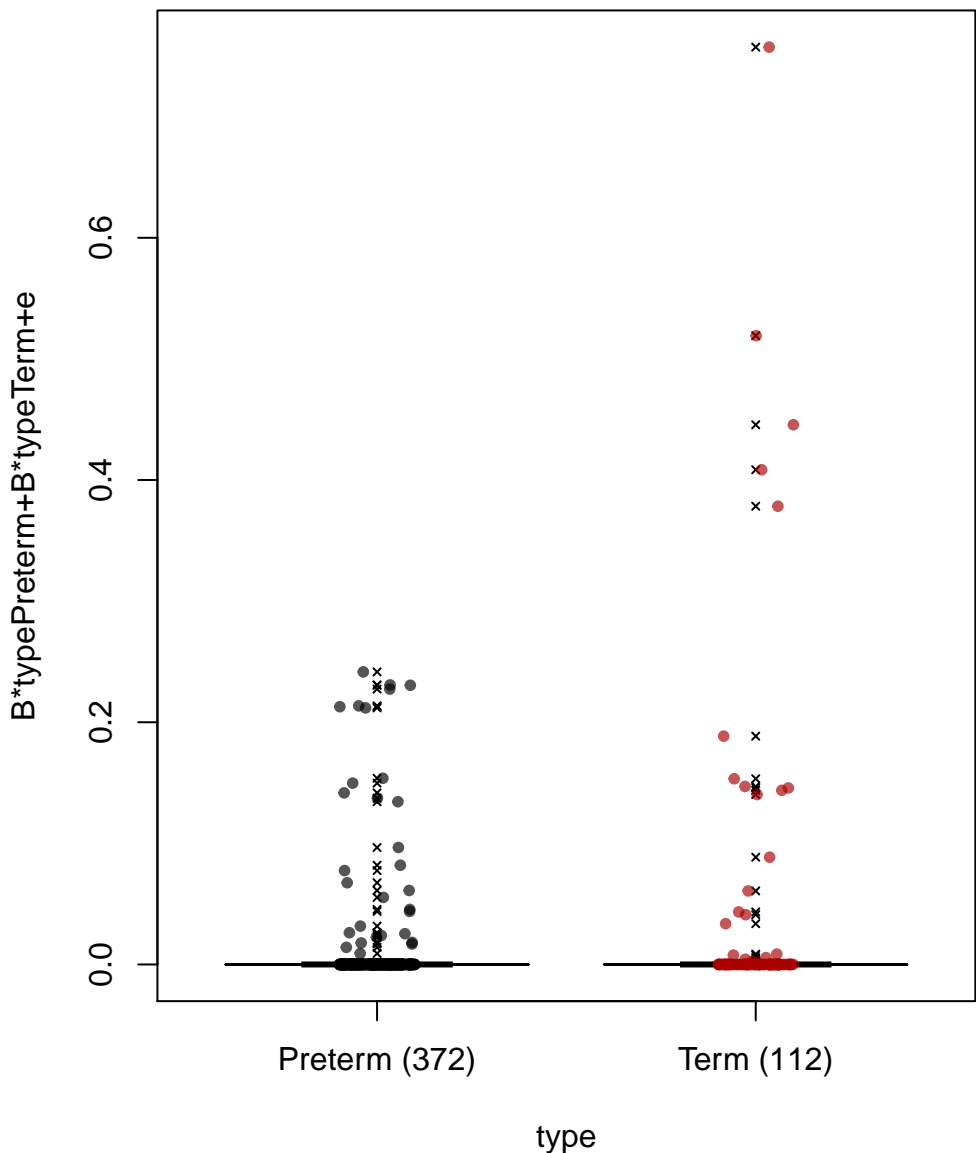

typeTerm (0.00946 sd 0.00268, p=0.000446, q=0.00196)

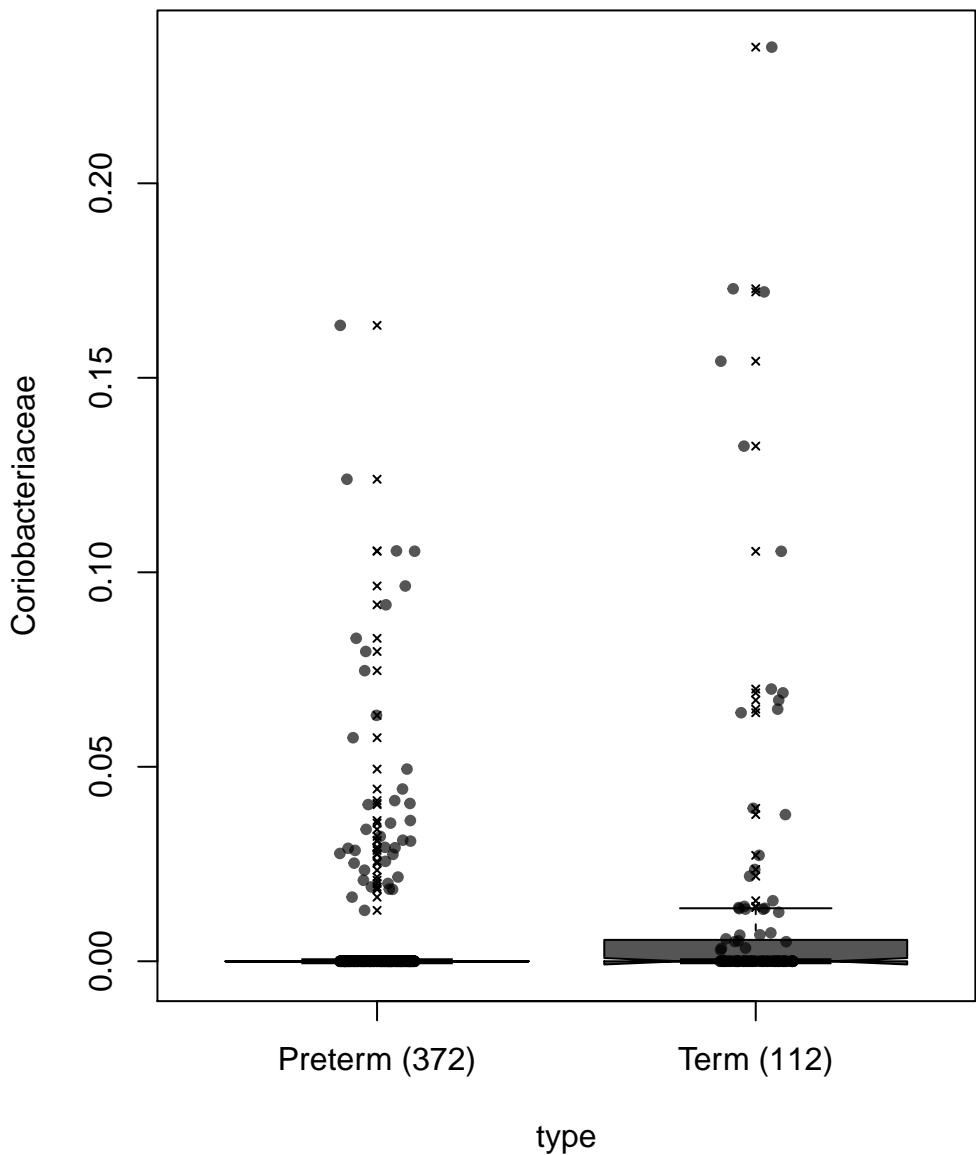

Partial Residual Plot

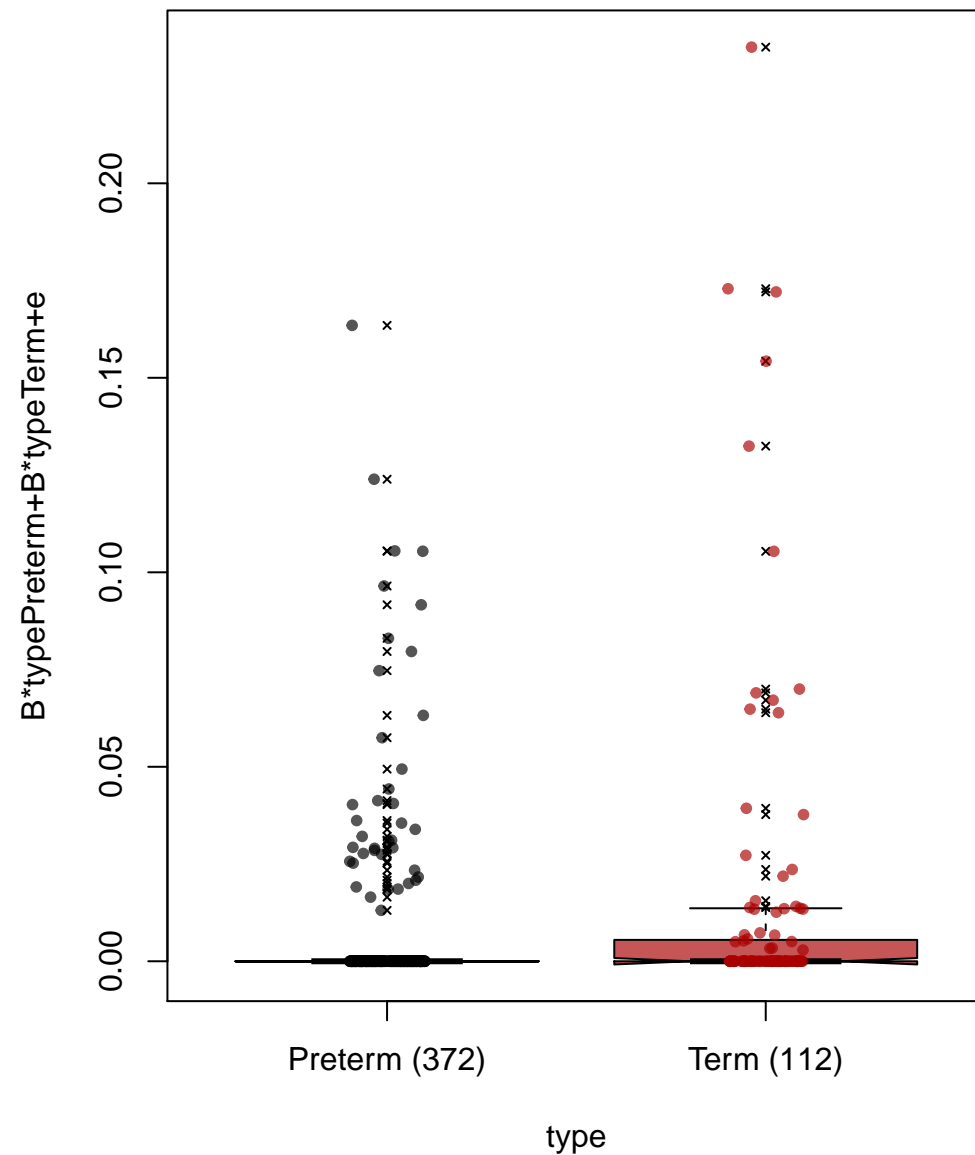

**typeTerm (0.000735 sd 0.00021, p=0.0005, q=0.00213)**

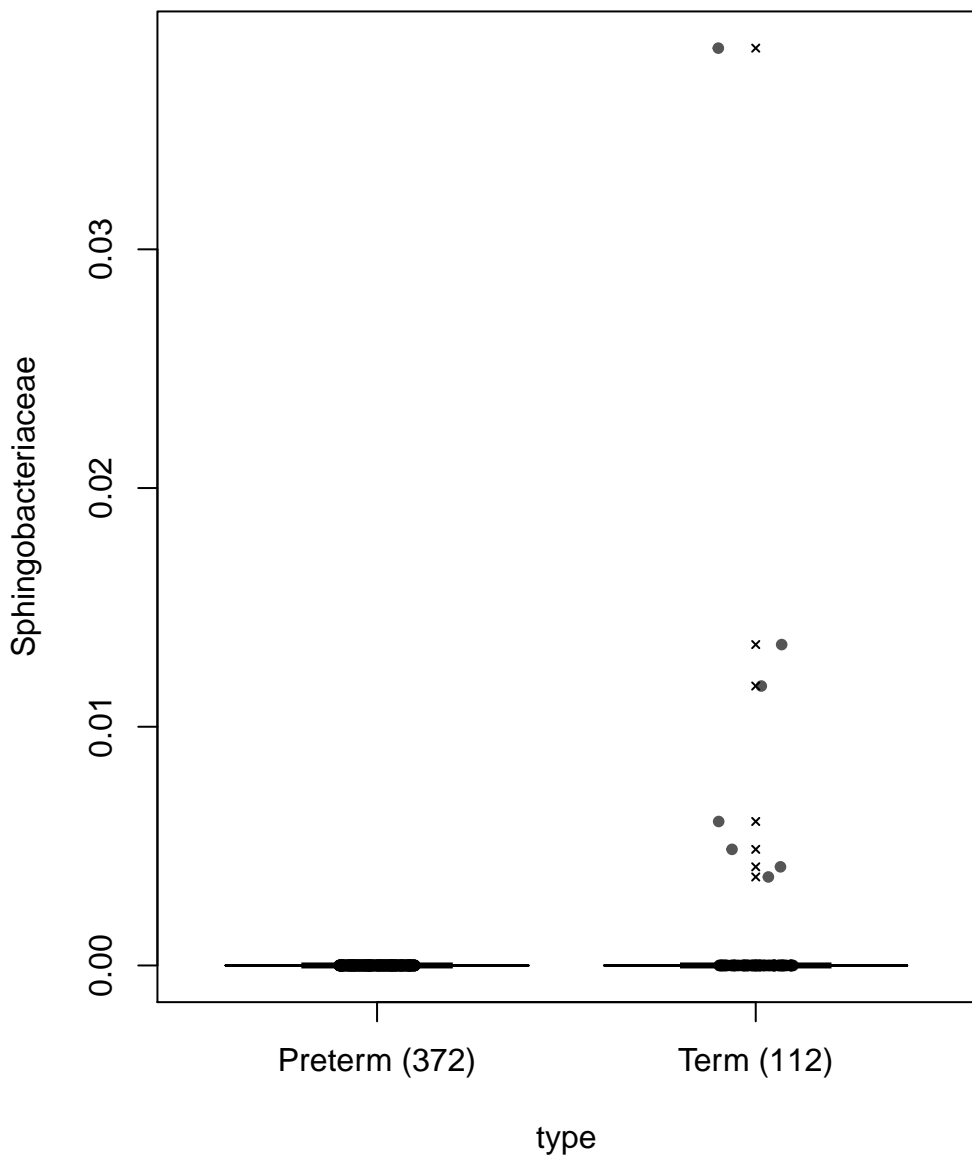

### Partial Residual Plot

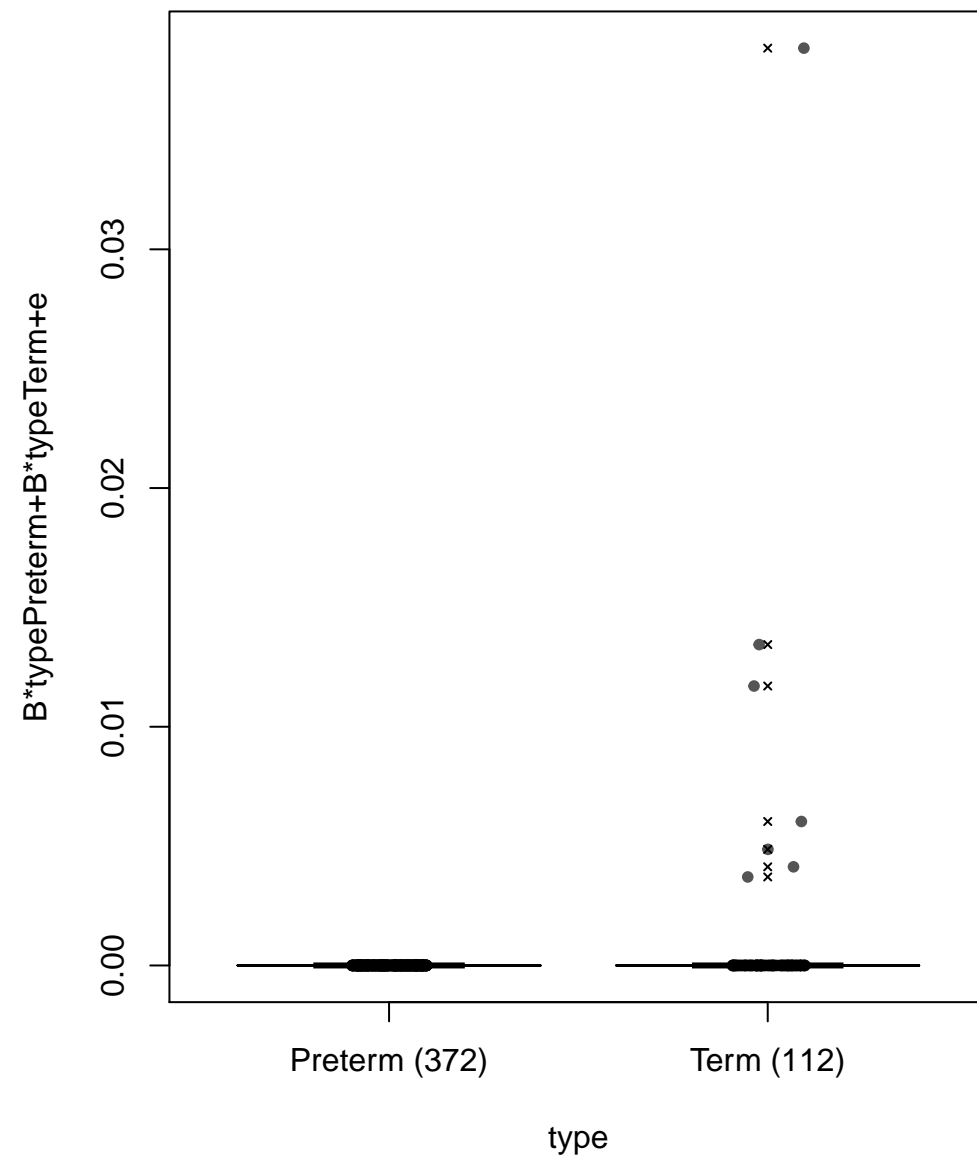

typeTerm (0.00169 sd 0.000505, p=0.000848, q=0.00348)

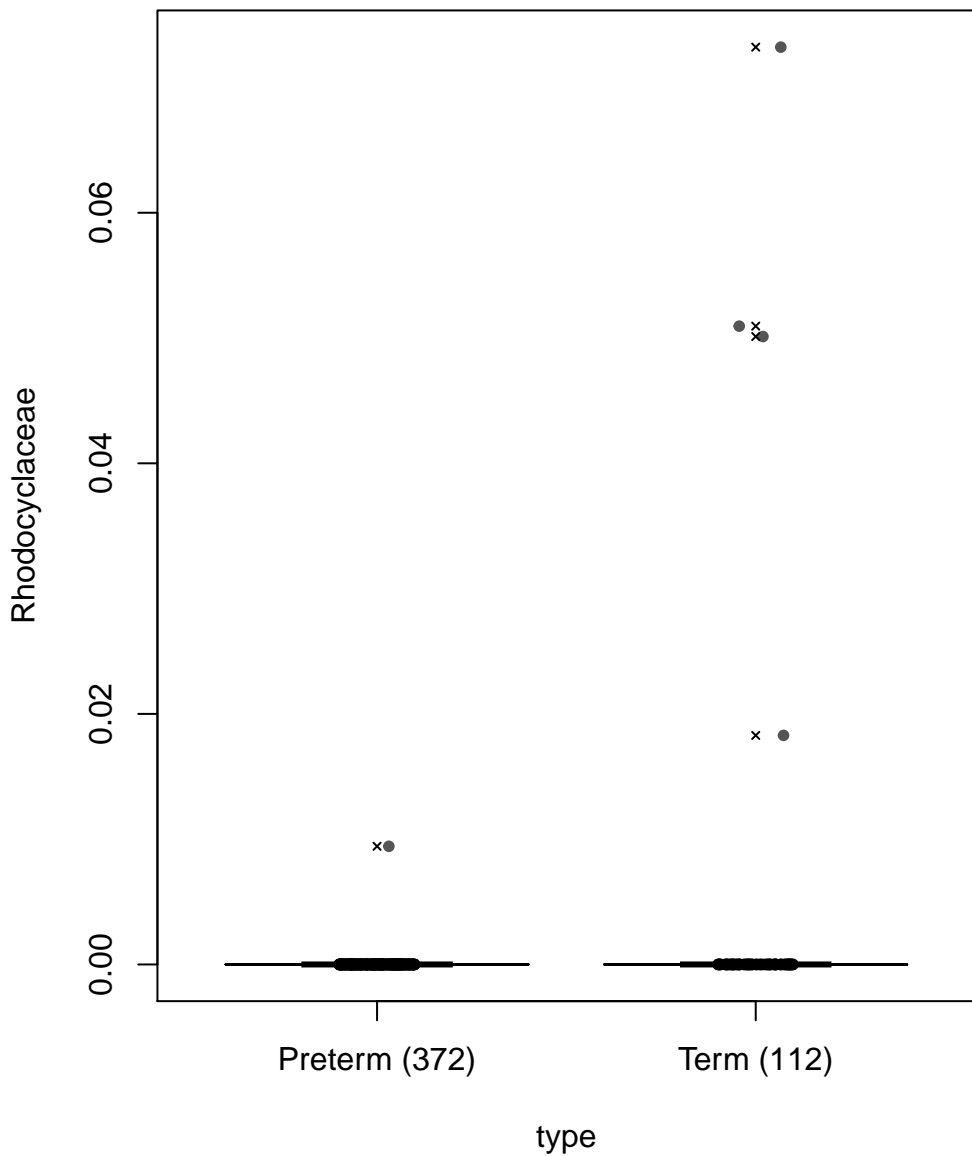

Partial Residual Plot

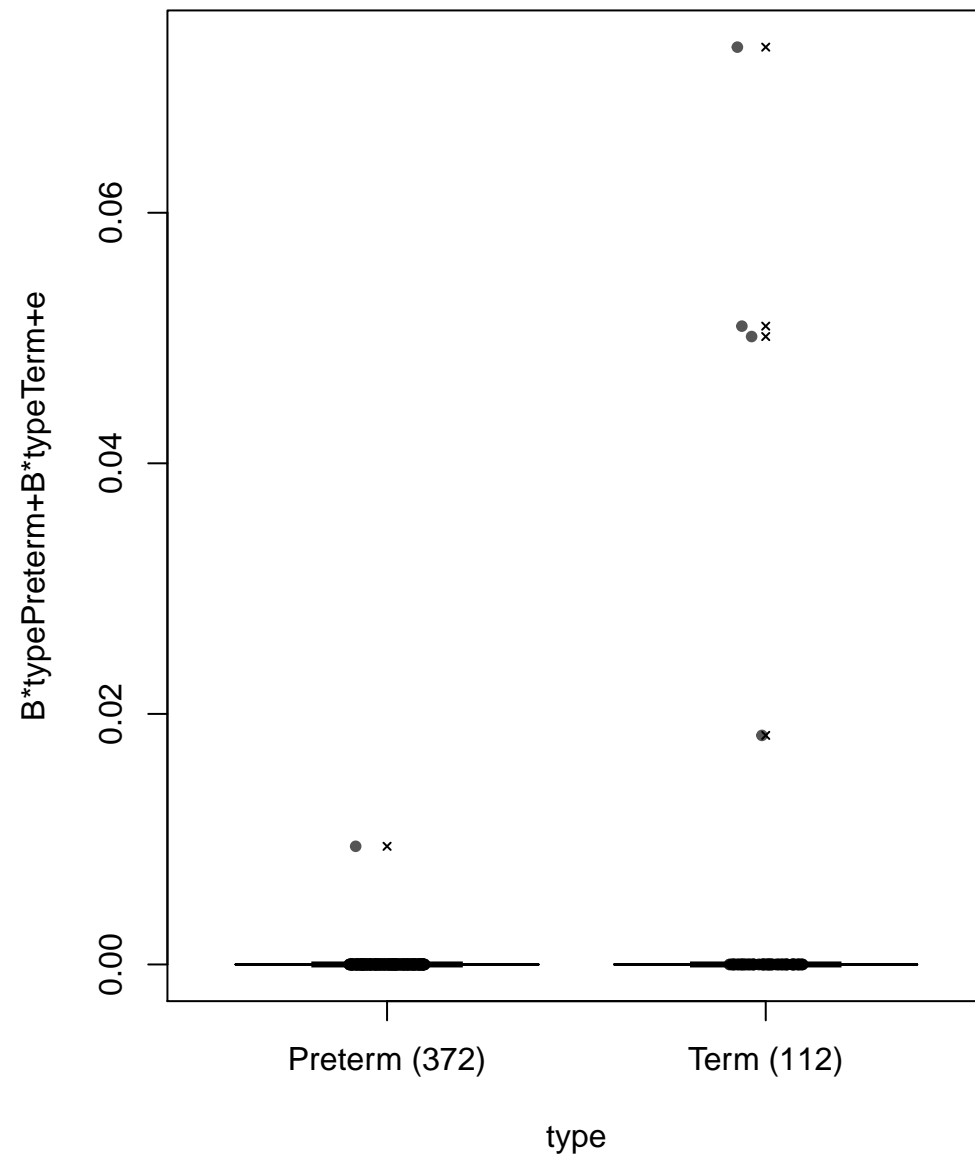

typeTerm (0.0102 sd 0.0031, p=0.00103, q=0.0041)

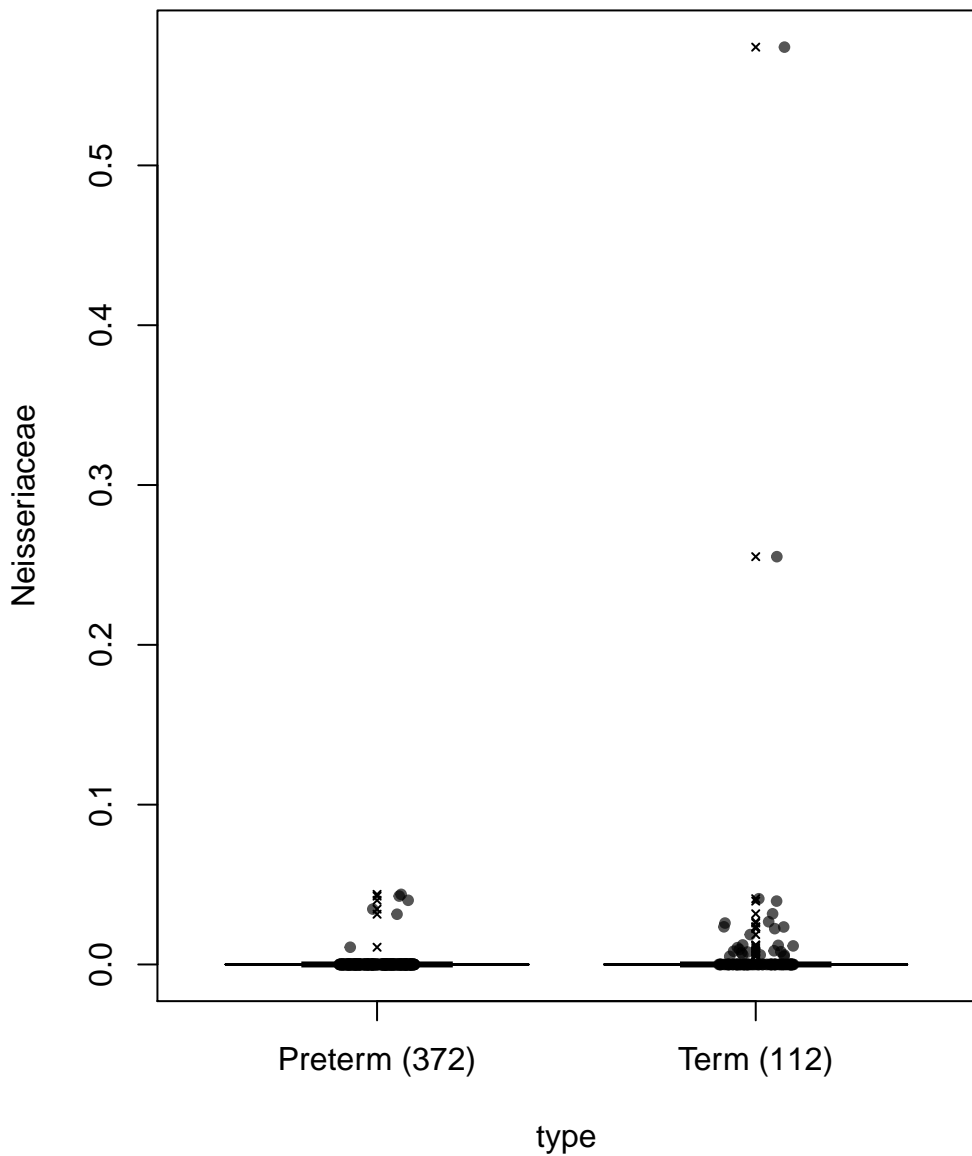

Partial Residual Plot

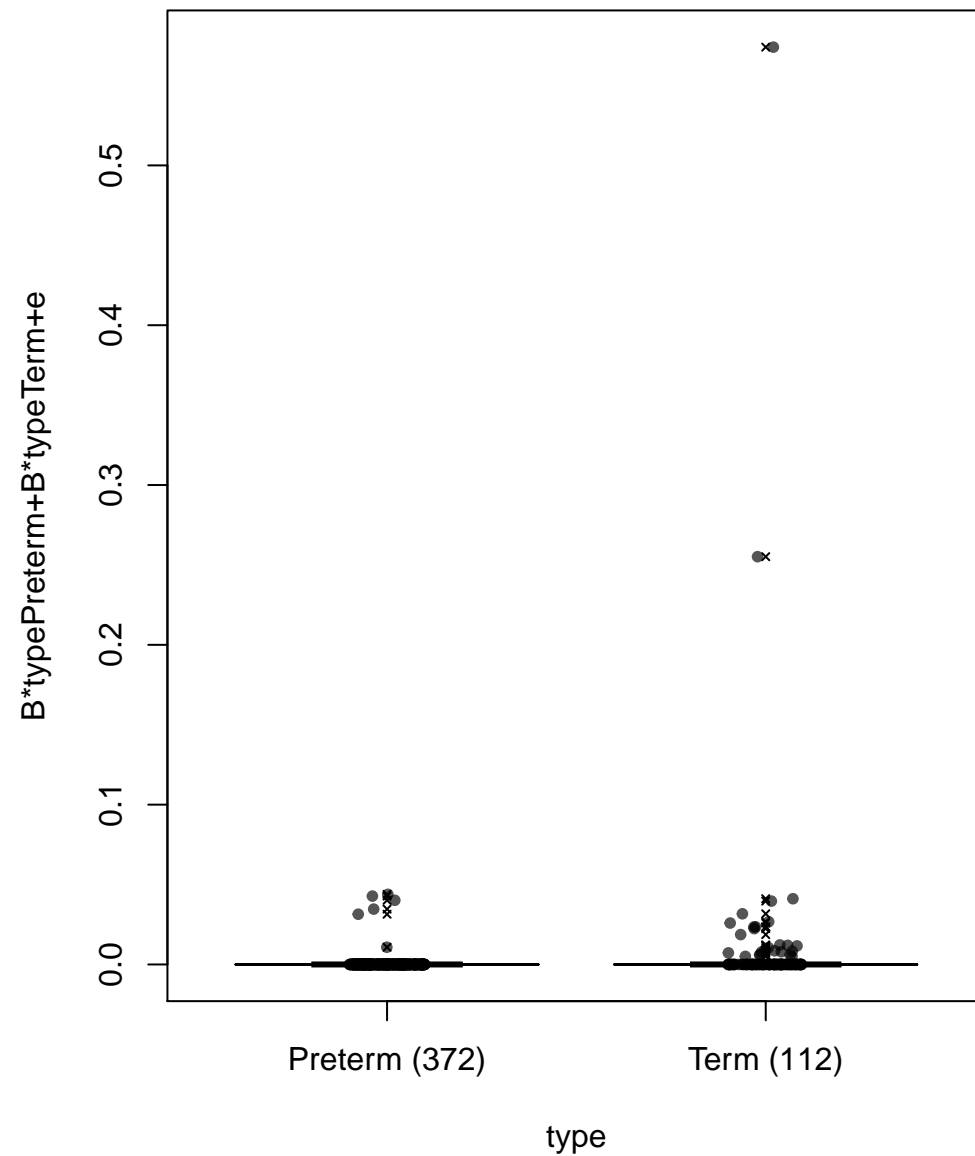

typeTerm (0.00154 sd 0.000486, p=0.00163, q=0.00624)

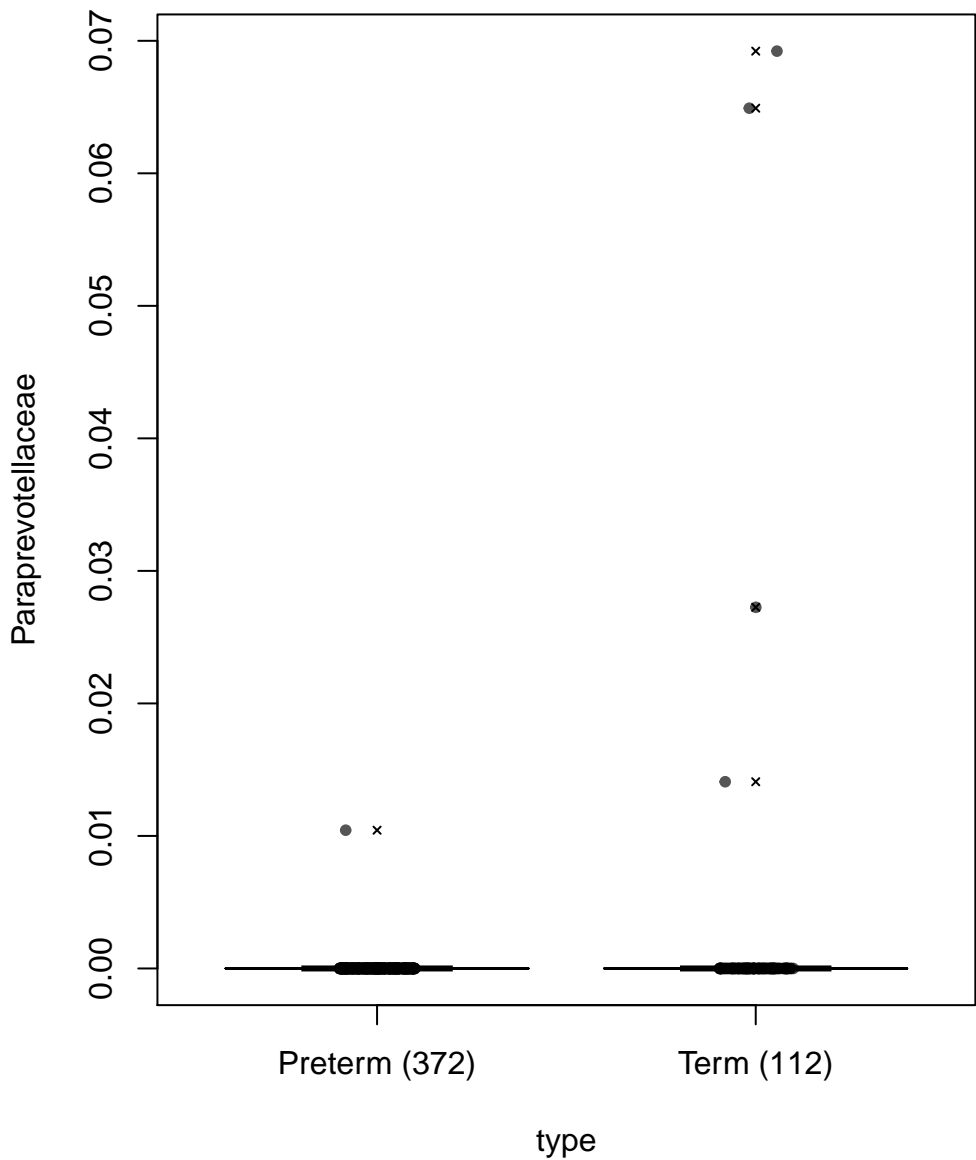

Partial Residual Plot

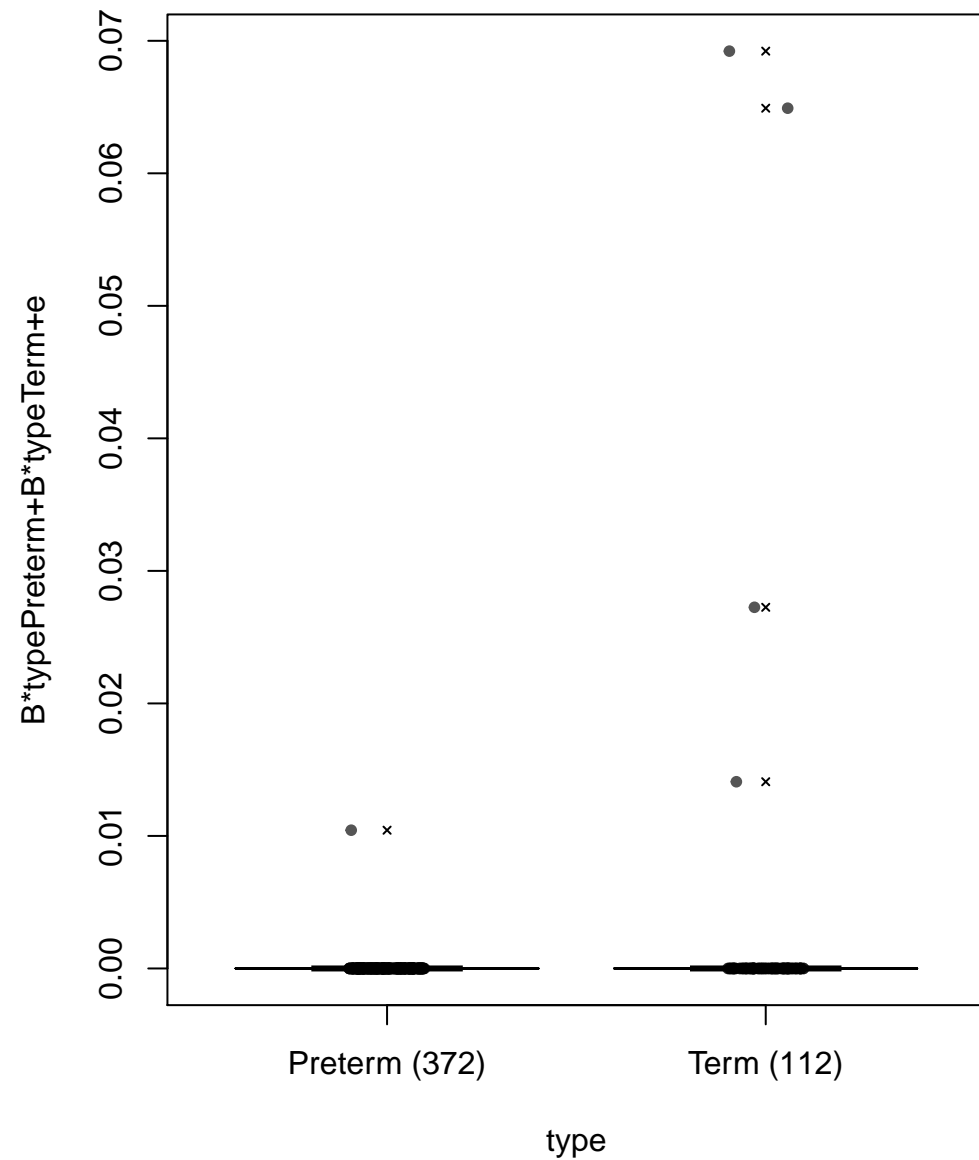



typeTerm (0.00778 sd 0.00247, p=0.00174, q=0.00646)

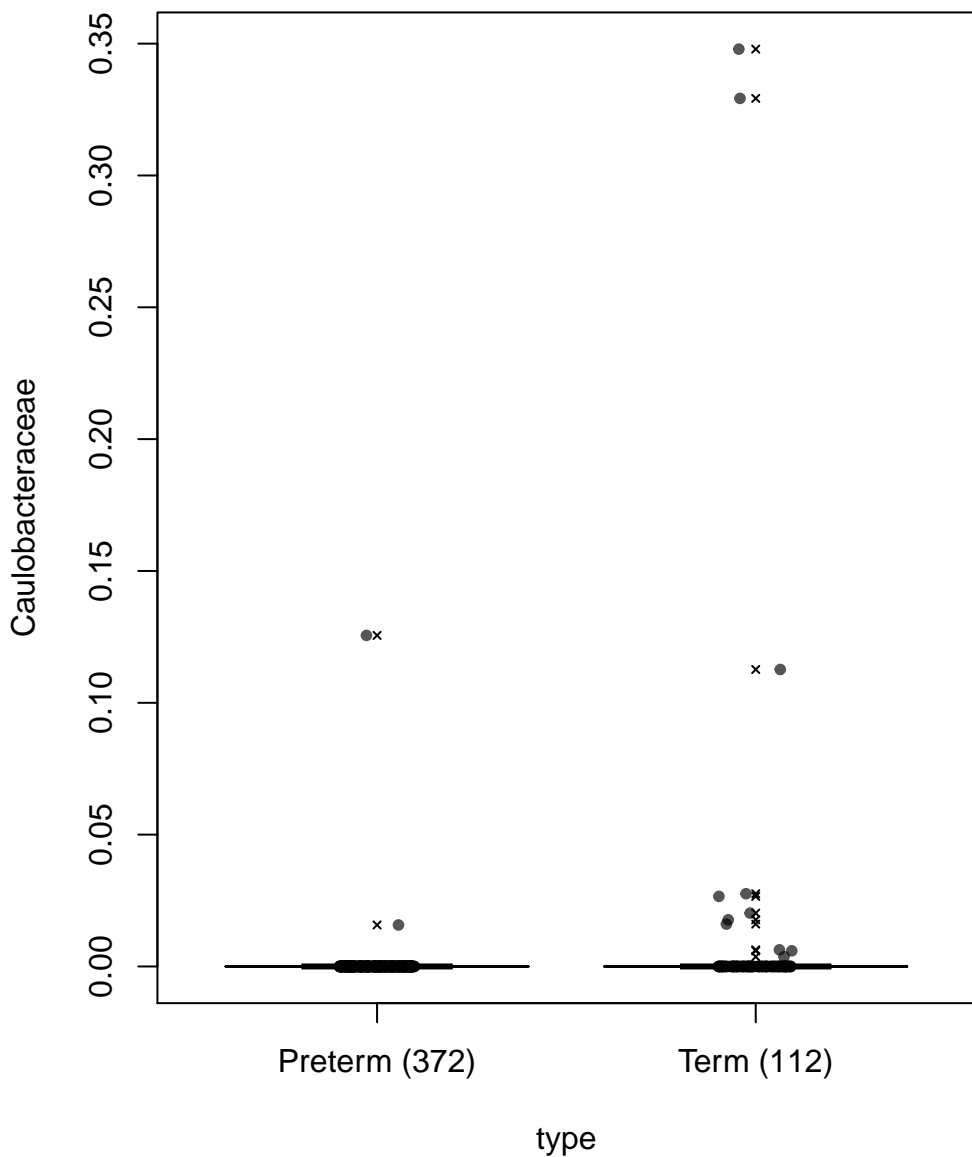

Partial Residual Plot

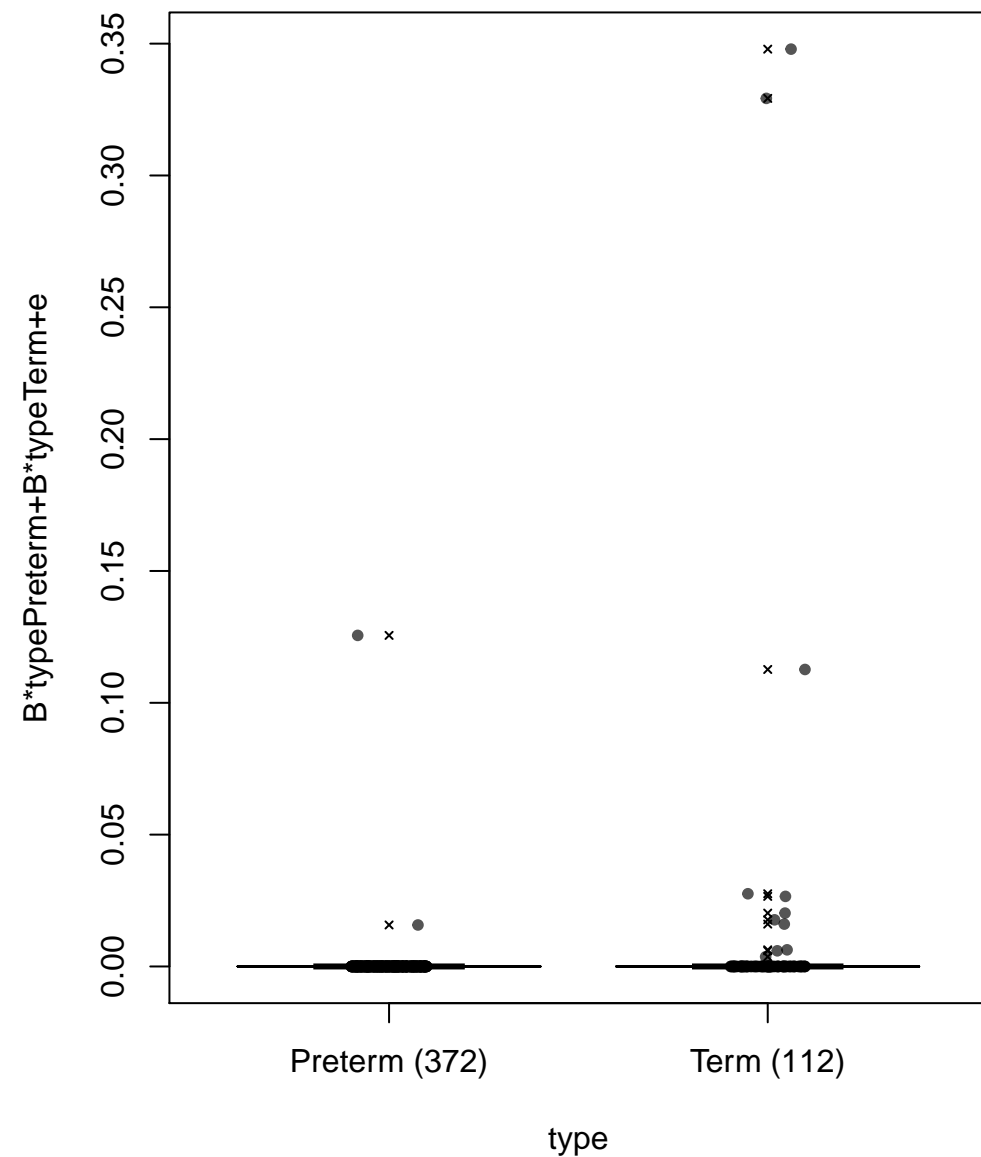

**typeTerm (0.00233 sd 0.000744, p=0.00186, q=0.0067)**

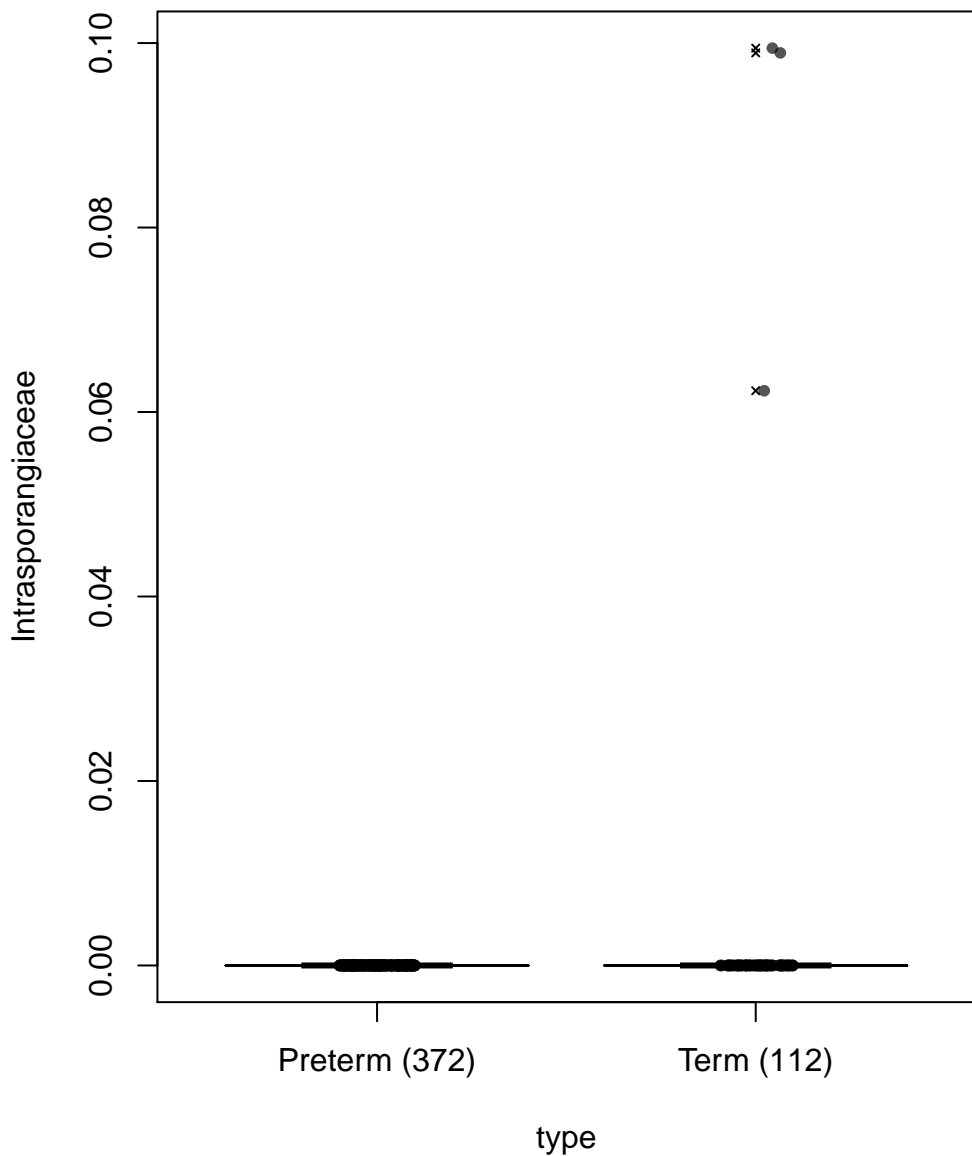

### Partial Residual Plot

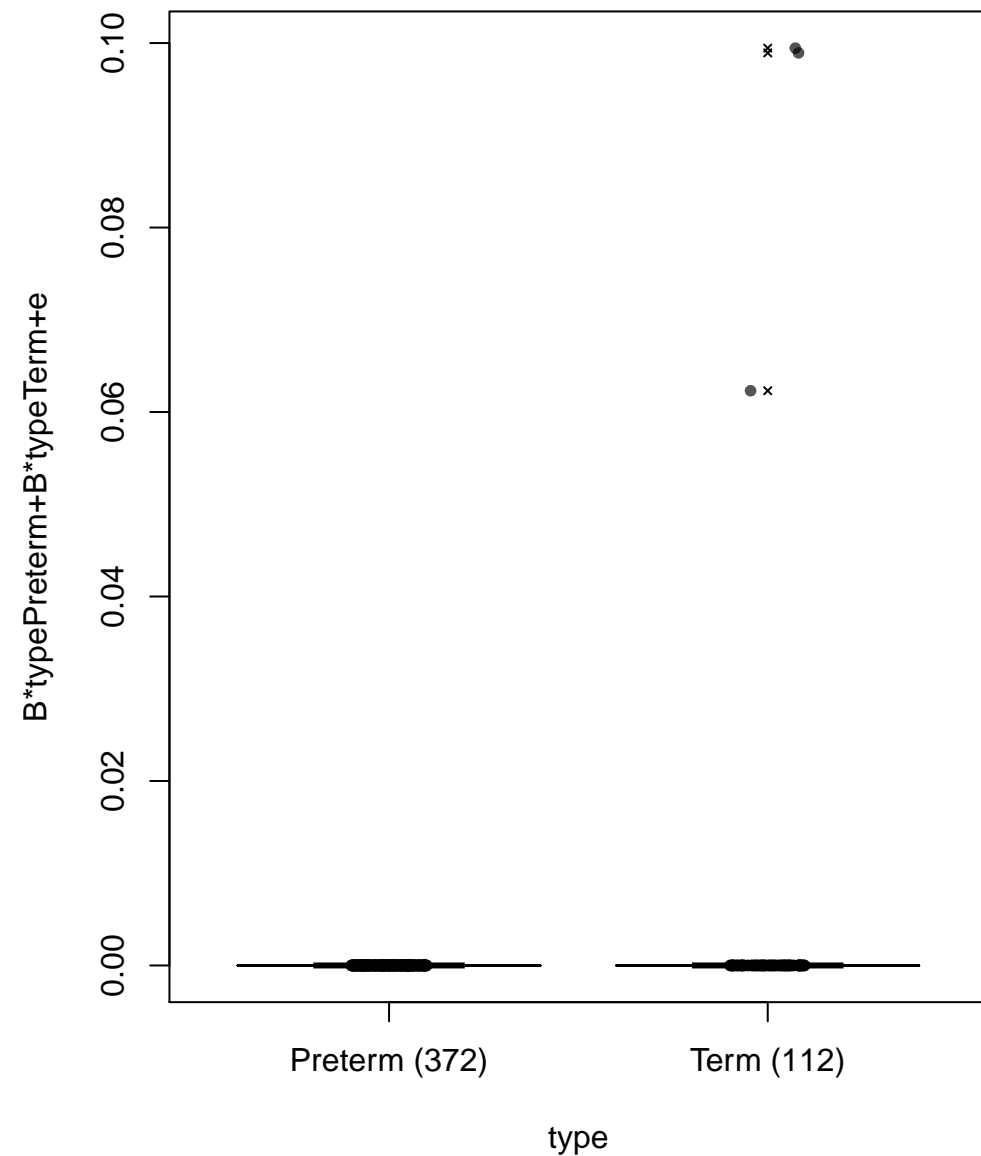

typeTerm (0.001 sd 0.000325, p=0.00215, q=0.00751)

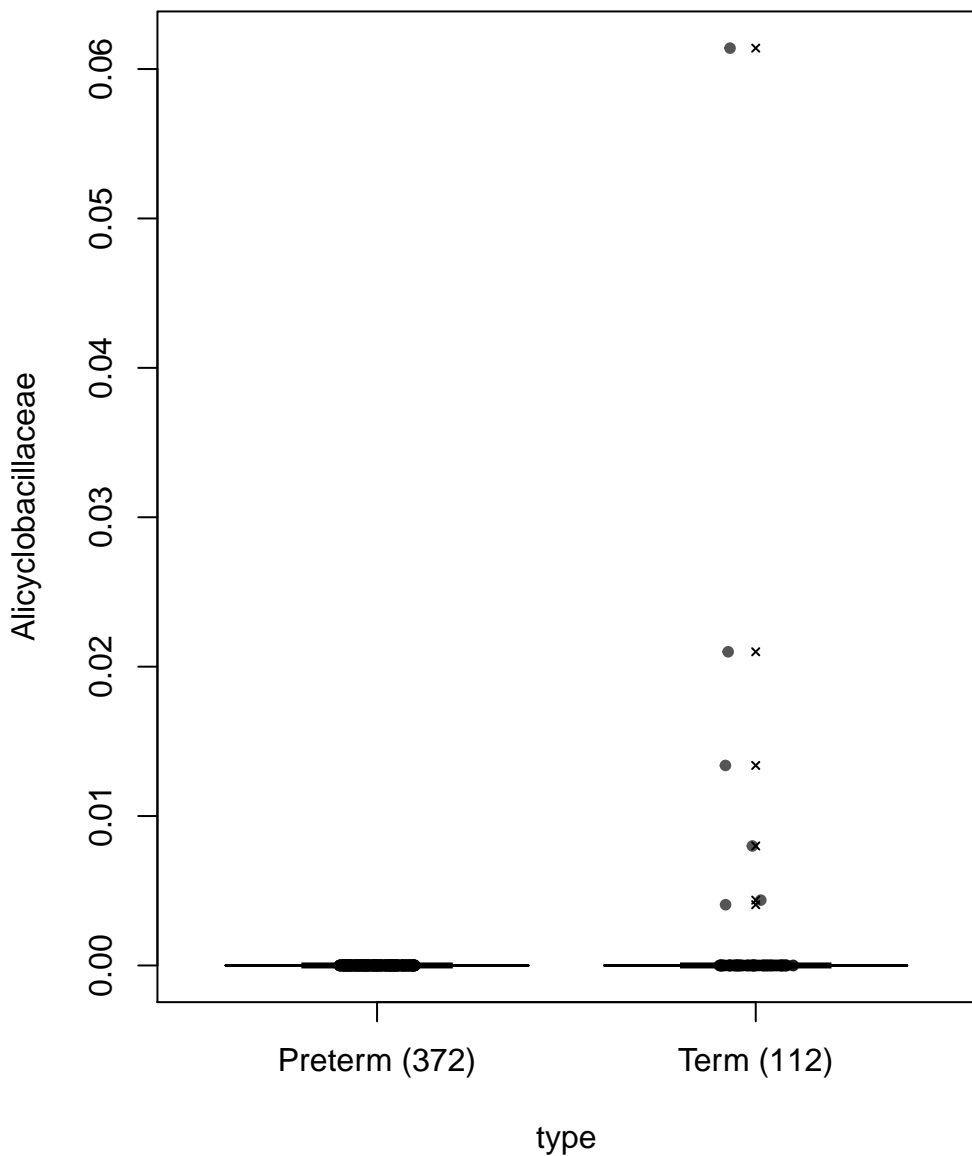

Partial Residual Plot

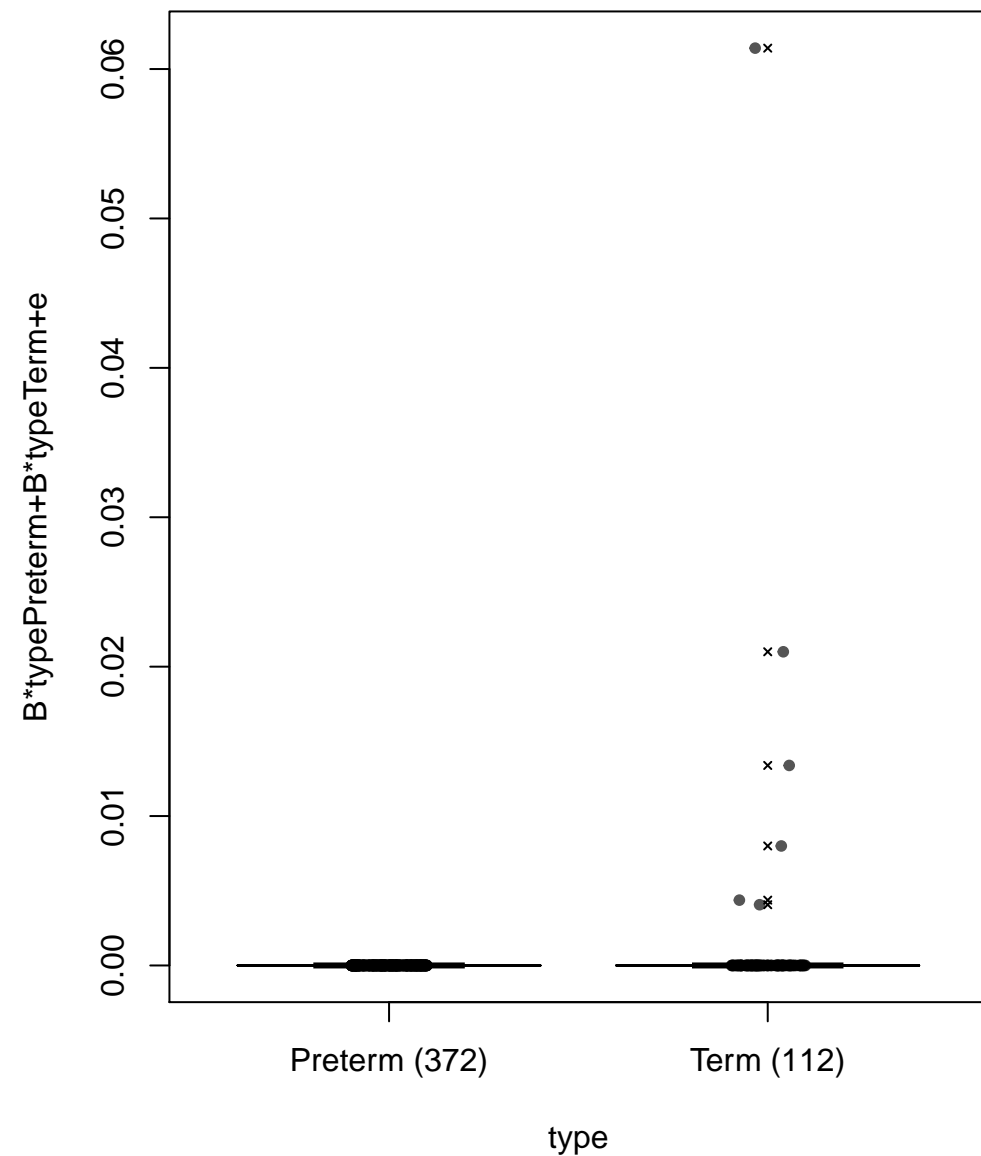

**typeTerm (0.00242 sd 0.000786, p=0.00221, q=0.00751)**

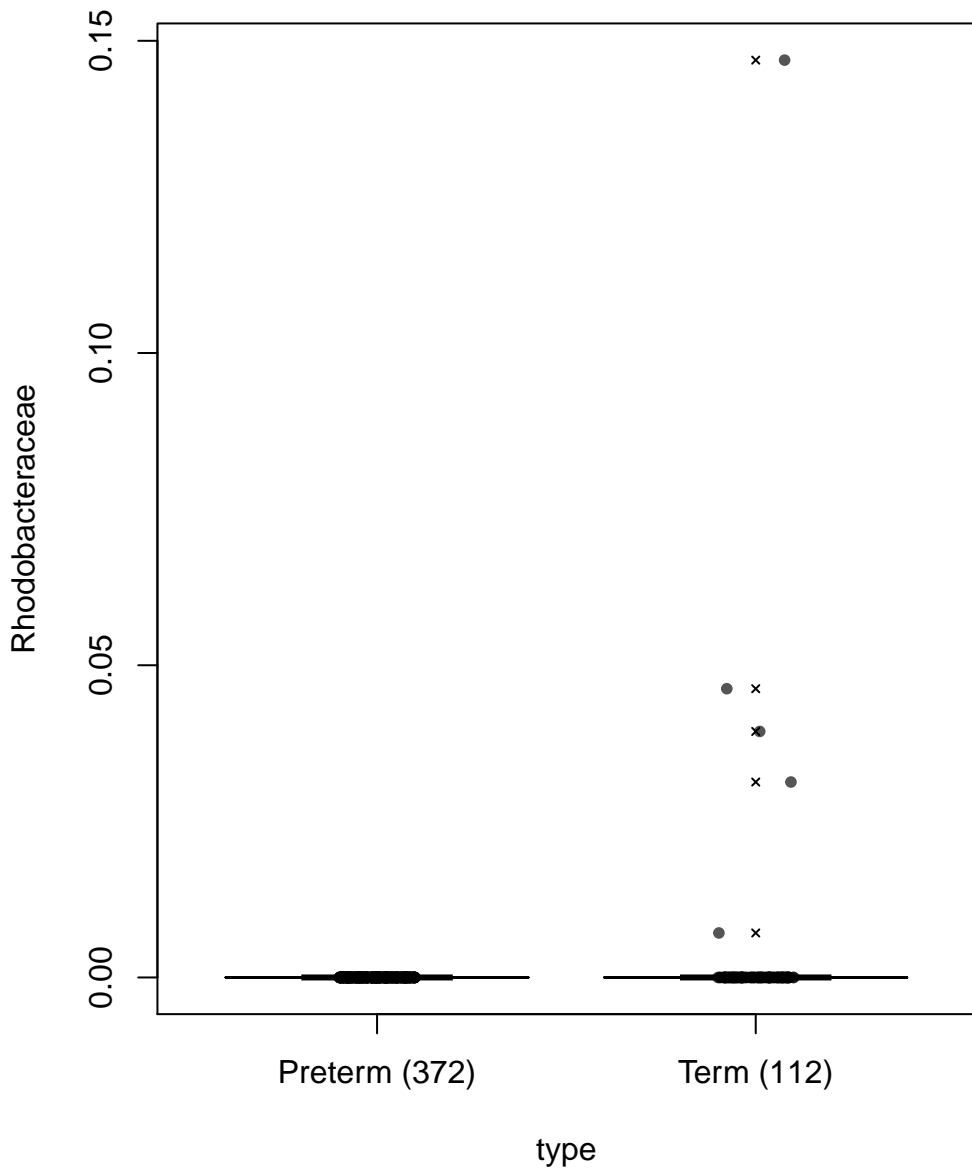

### Partial Residual Plot

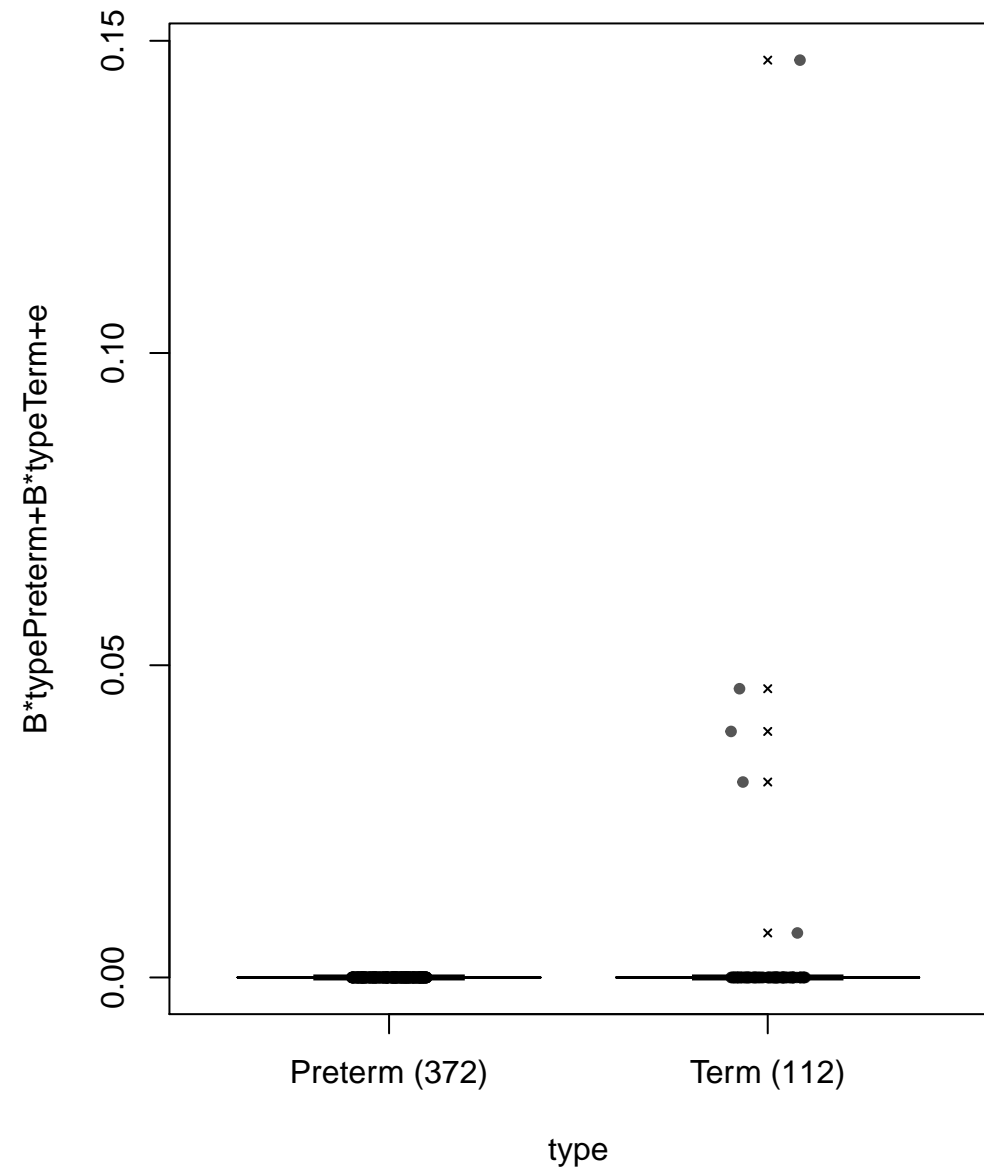

typeTerm (0.00398 sd 0.00133, p=0.003, q=0.00991)

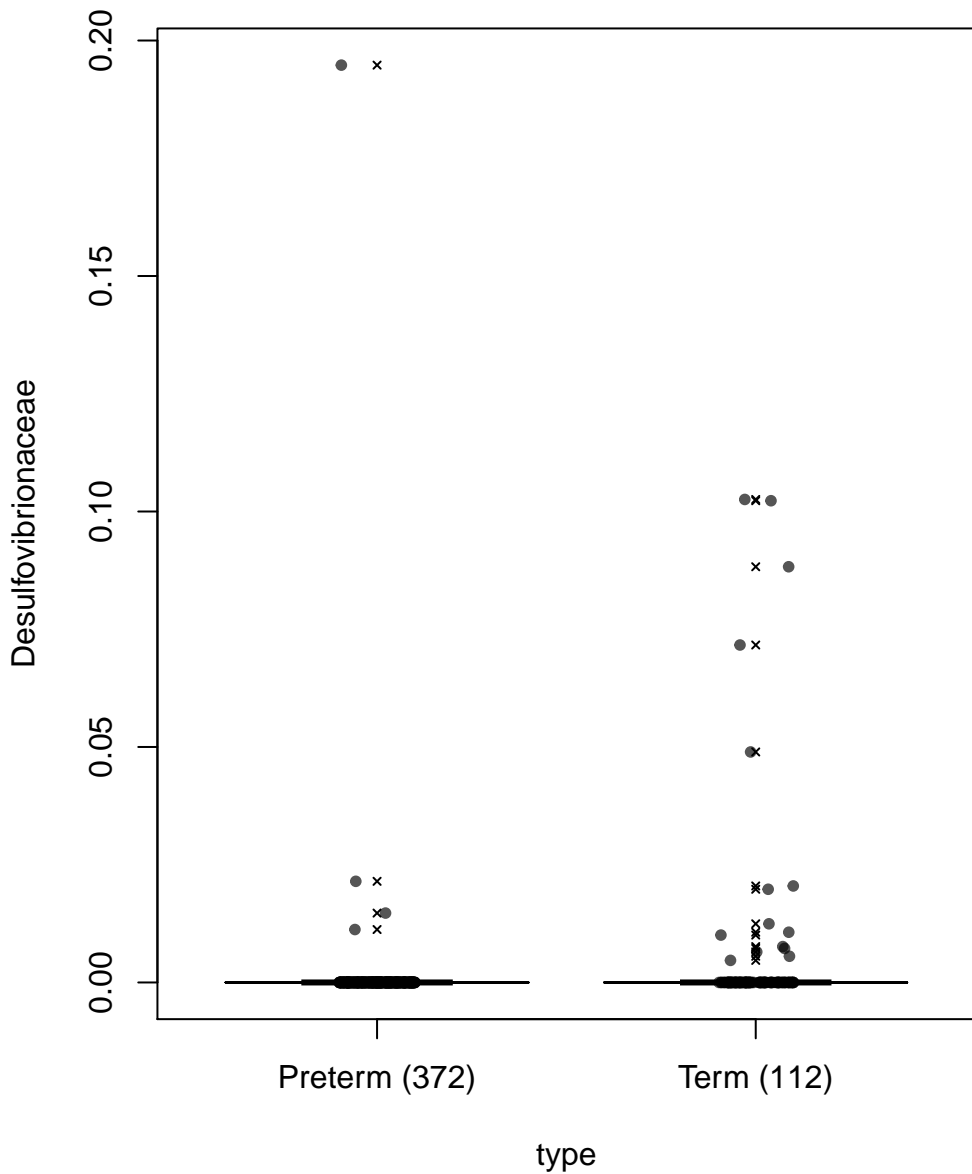

Partial Residual Plot

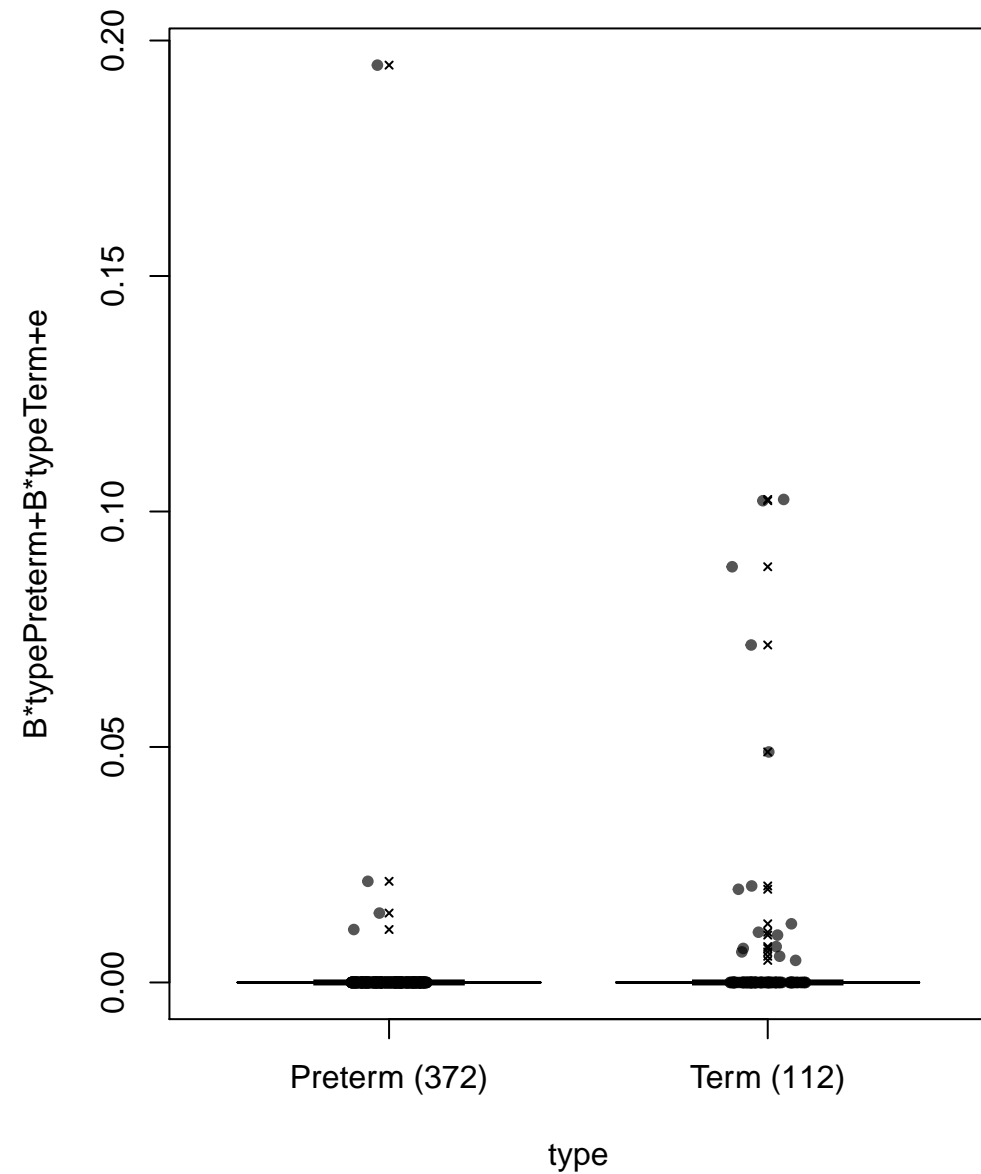

**typeTerm (0.00143 sd 0.000512, p=0.00534, q=0.0172)**

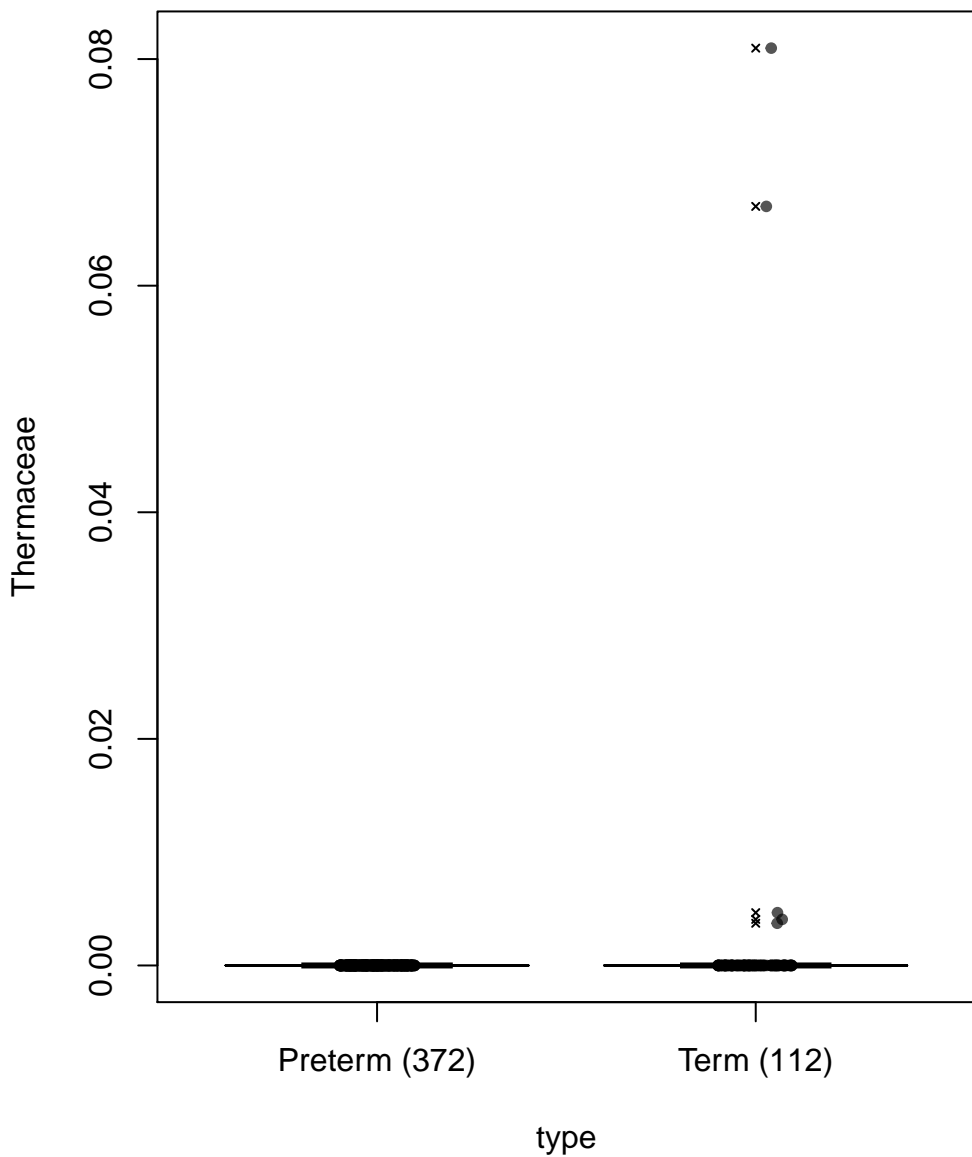

### Partial Residual Plot

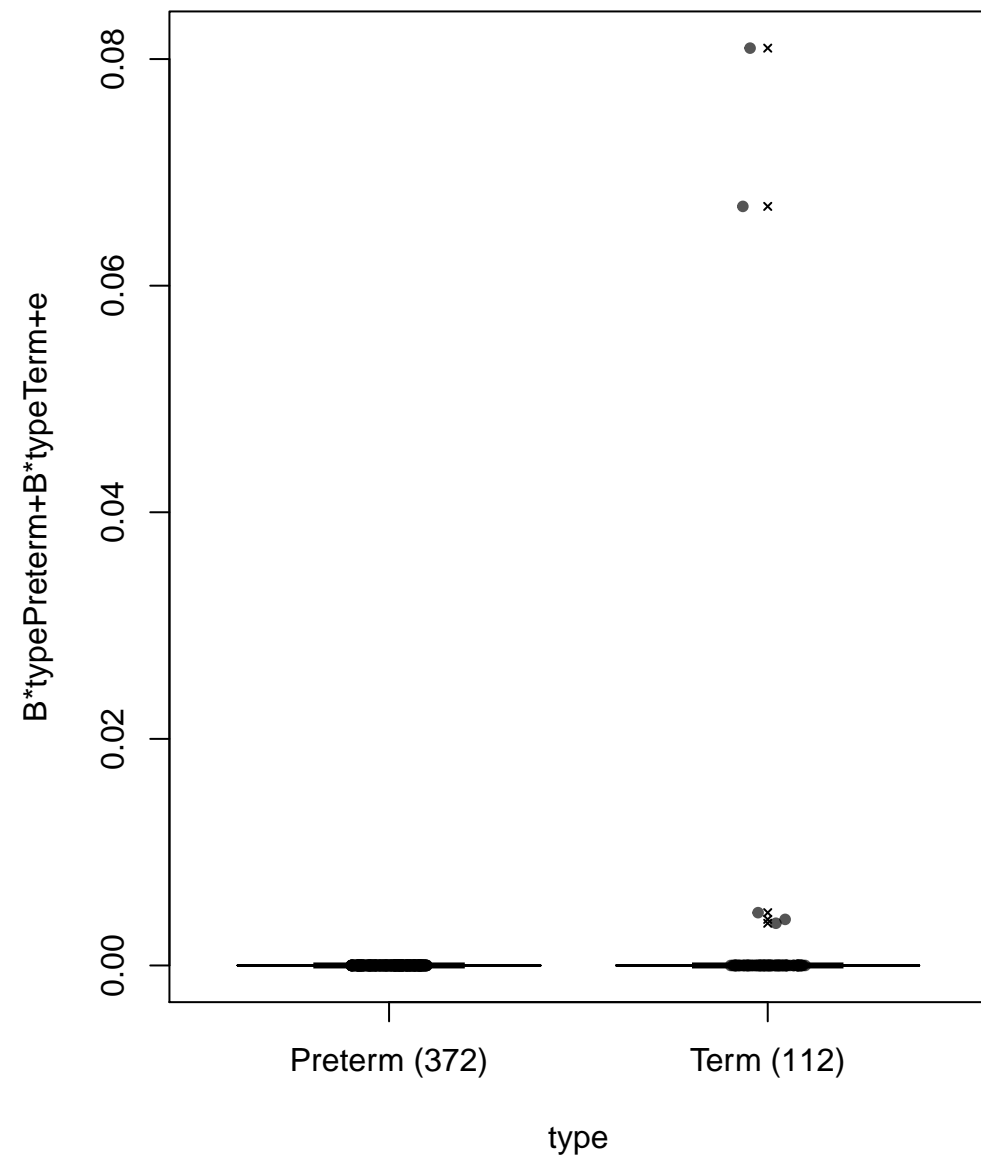

typeTerm (0.00159 sd 0.000572, p=0.00578, q=0.0181)

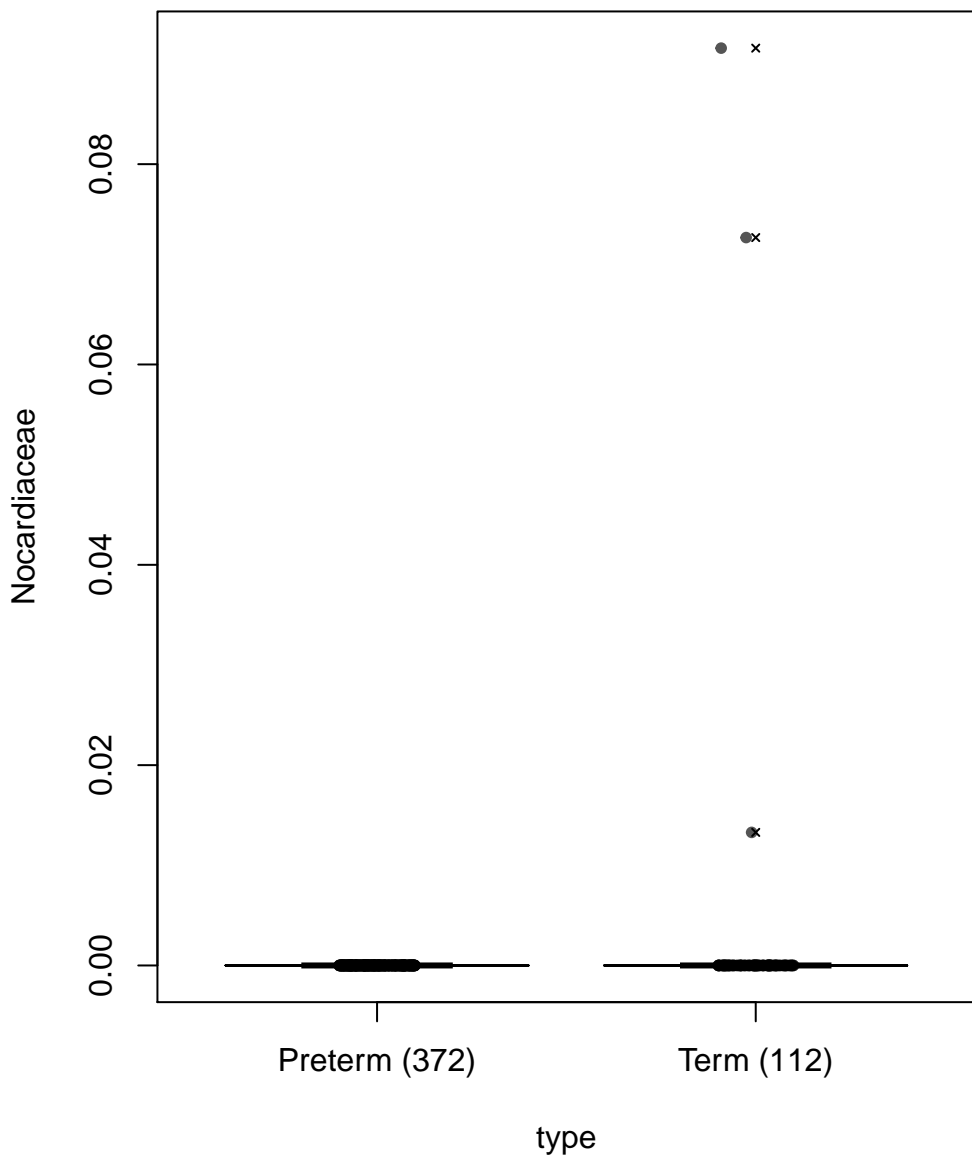

Partial Residual Plot

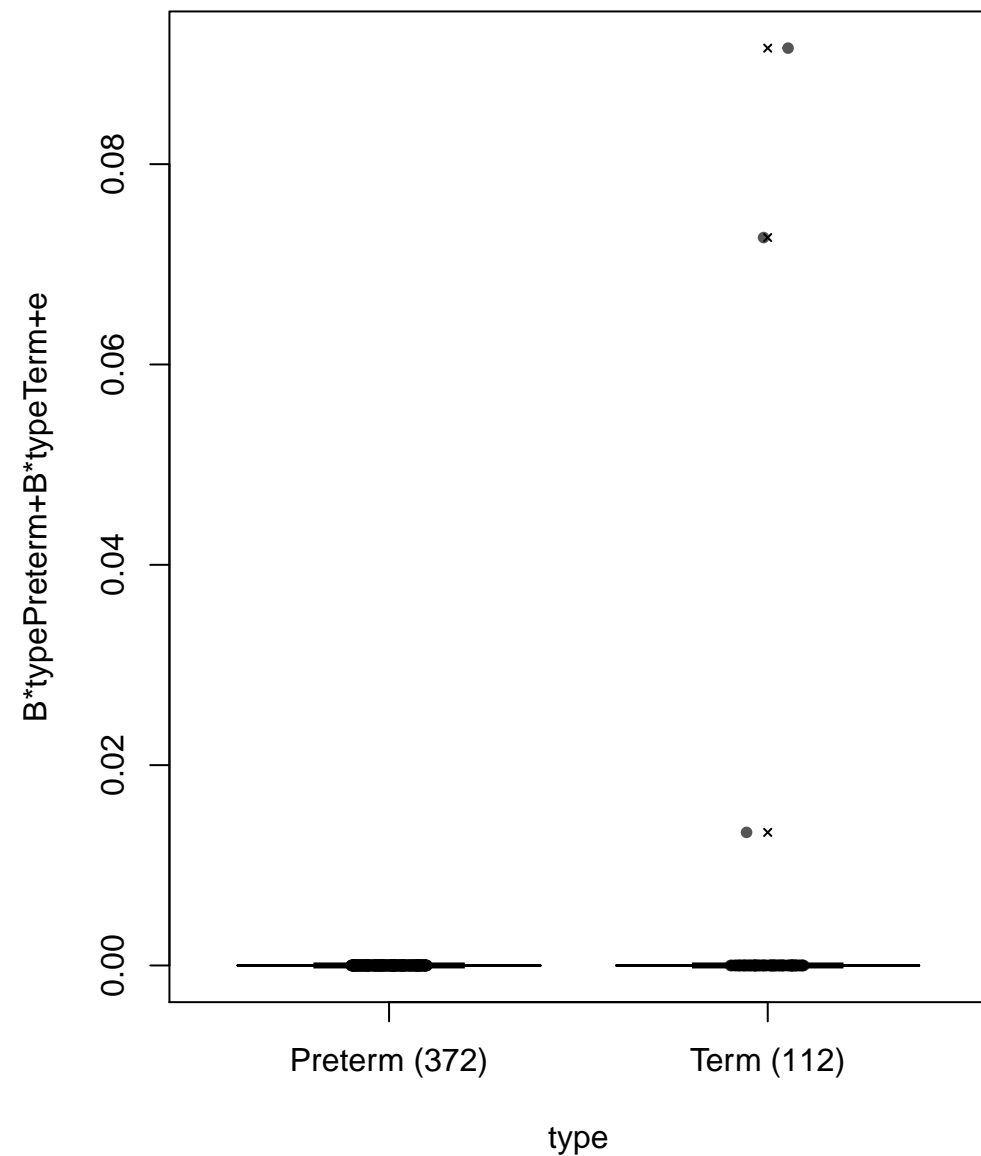

typeTerm (0.00139 sd 0.000513, p=0.00691, q=0.0207)

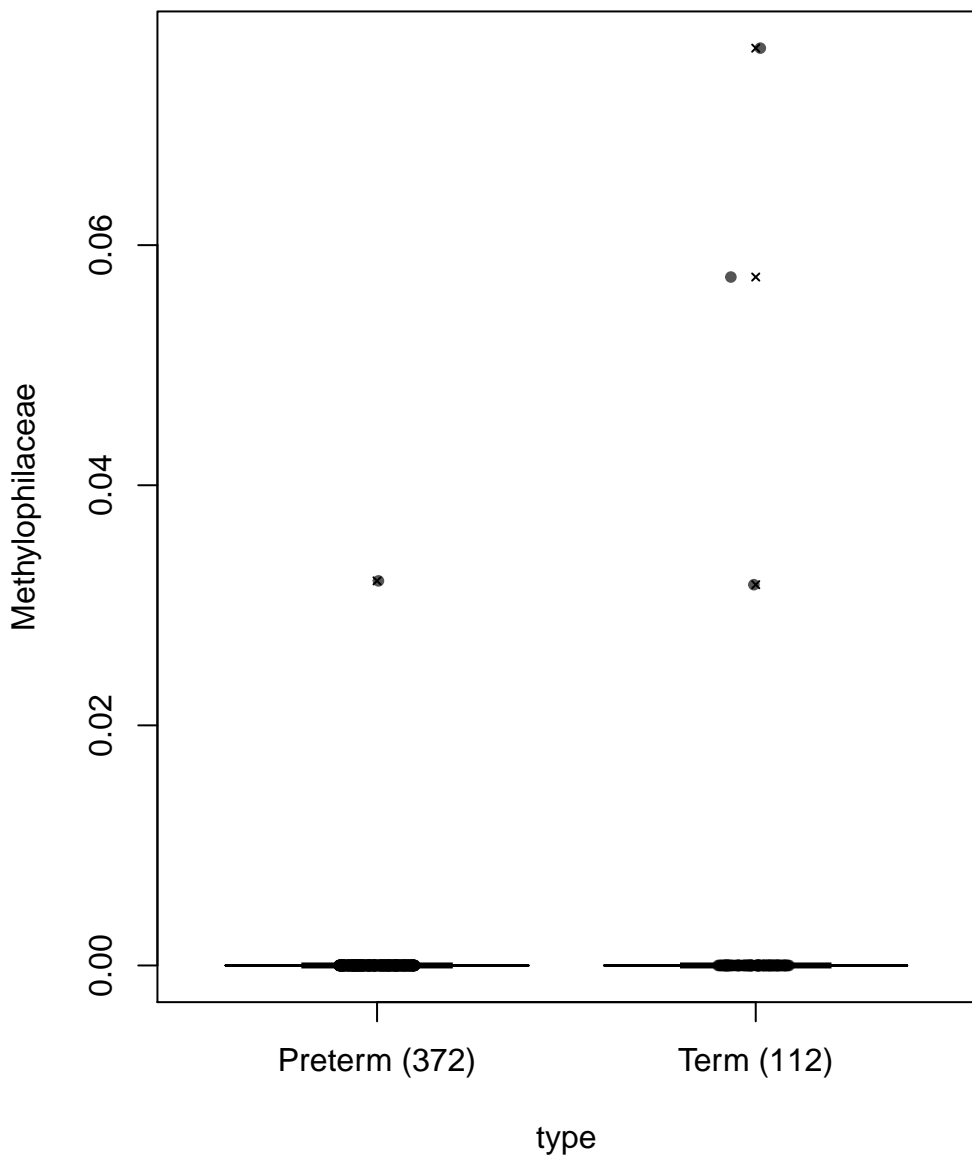

Partial Residual Plot

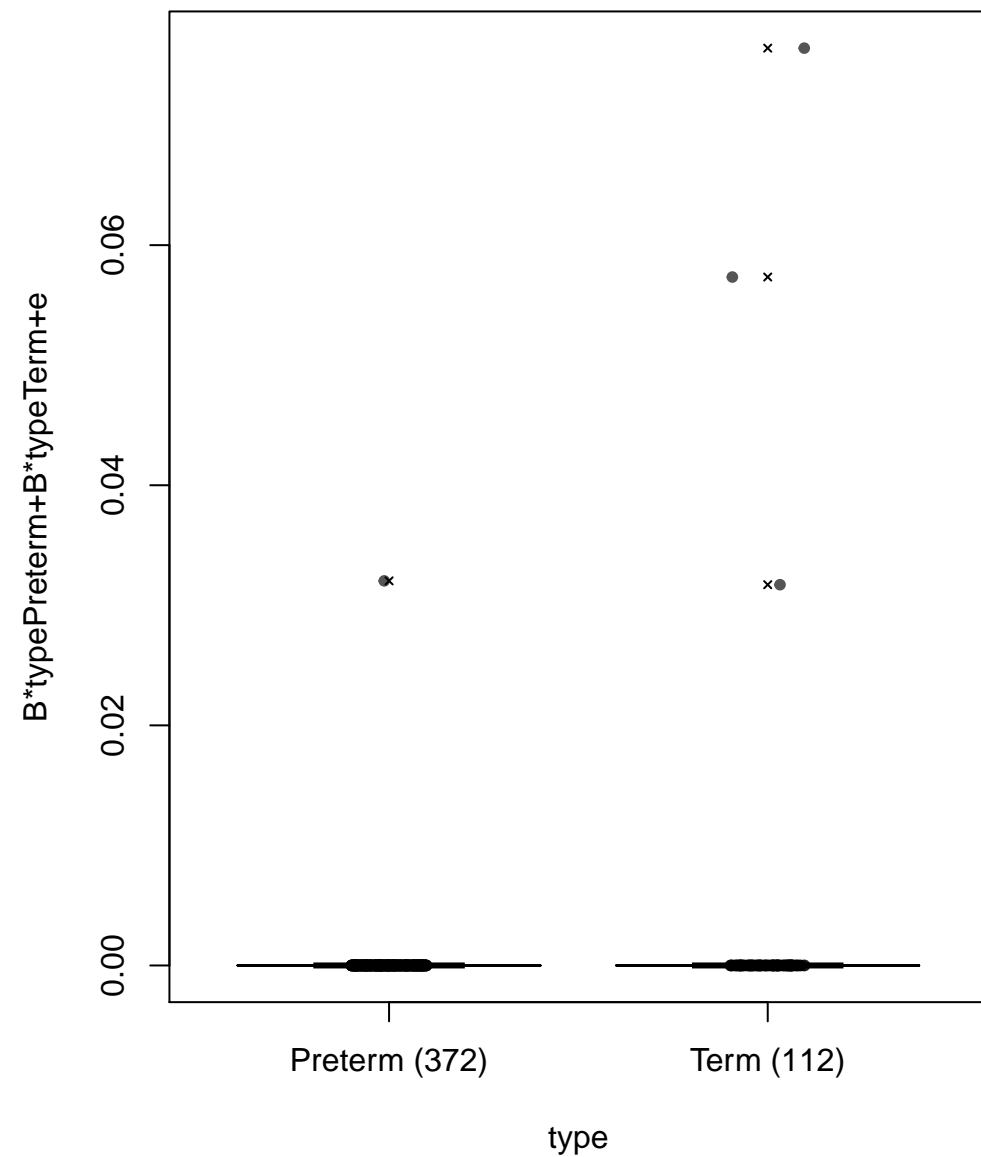



typeTerm (0.000603 sd 0.000223, p=0.00697, q=0.0207)

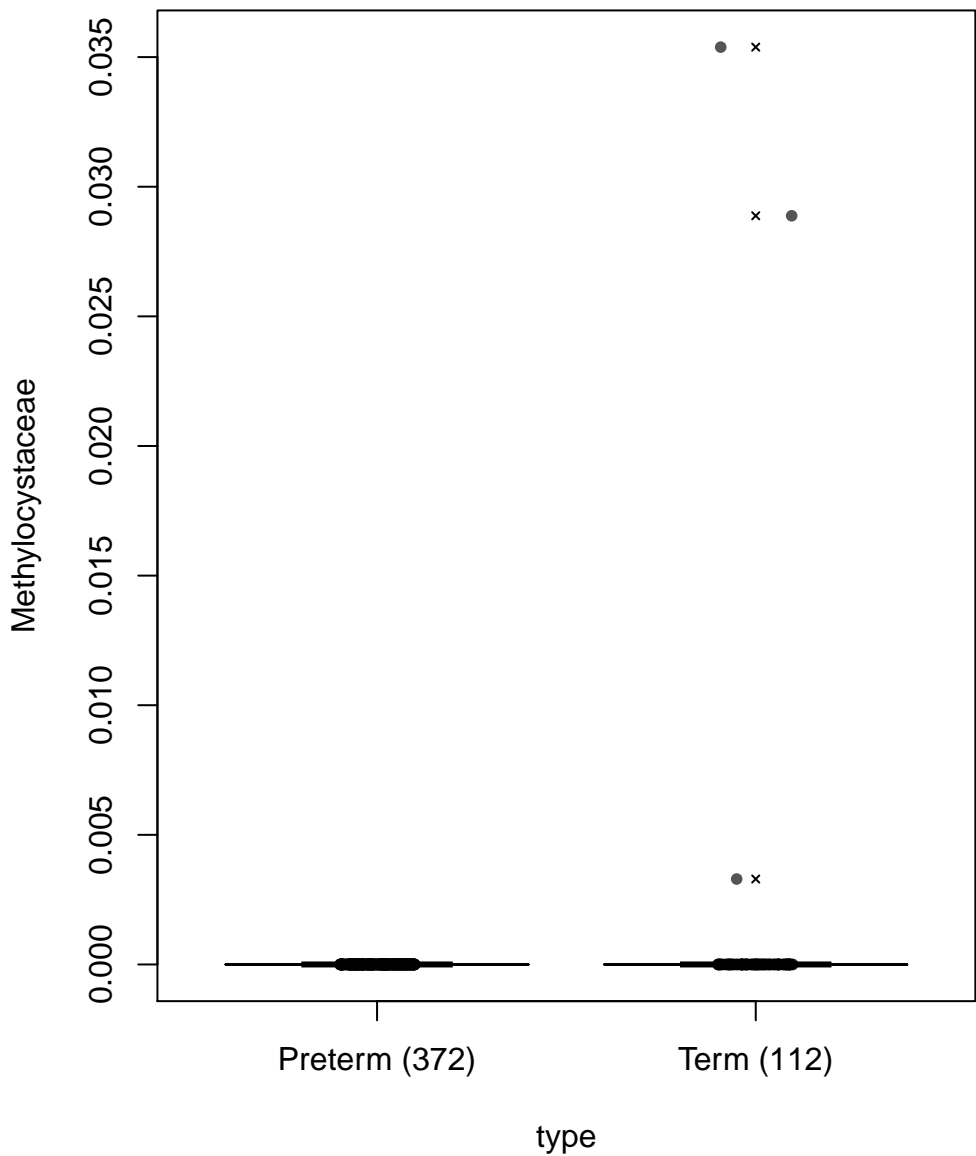

Partial Residual Plot

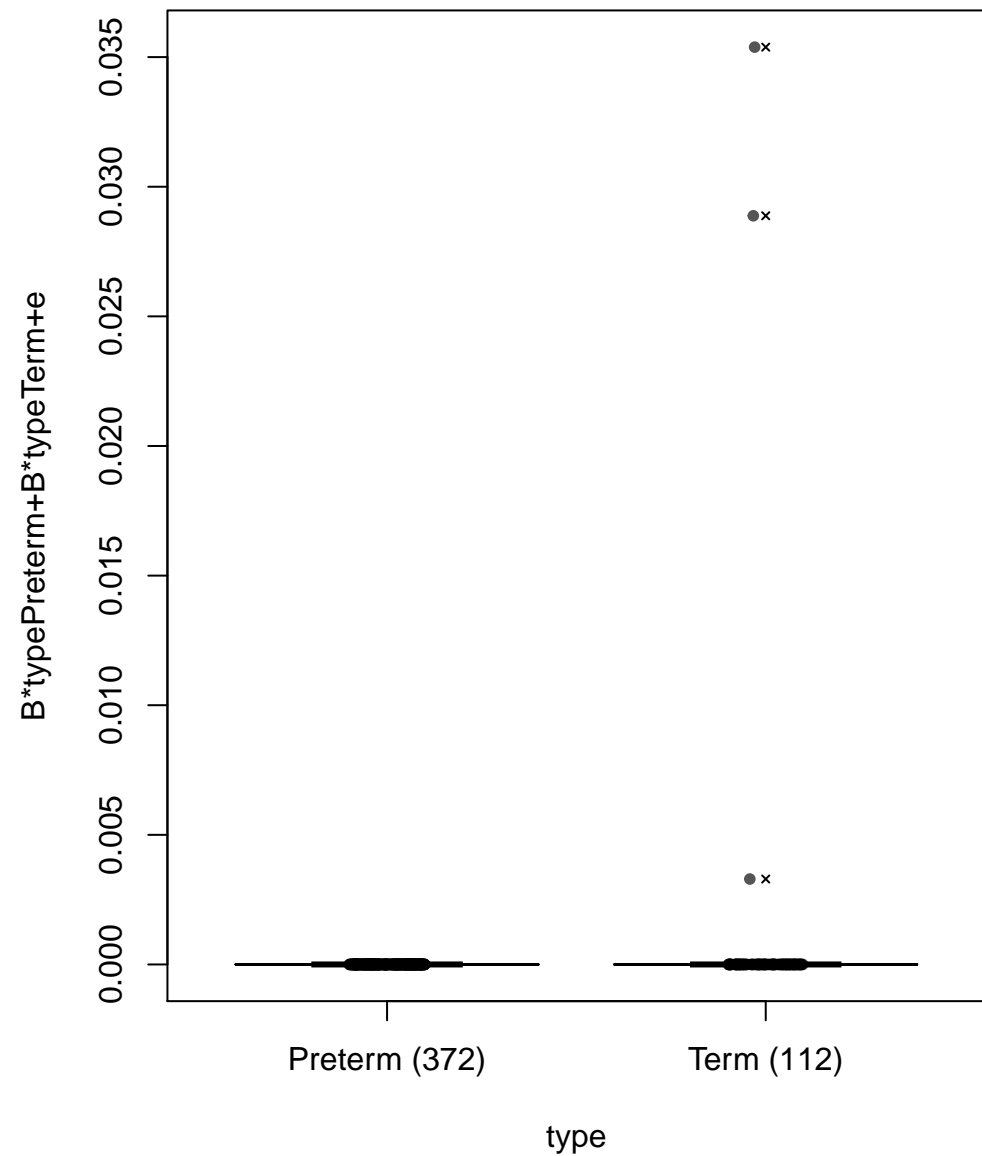

typeTerm (0.00107 sd 0.000398, p=0.00751, q=0.0218)

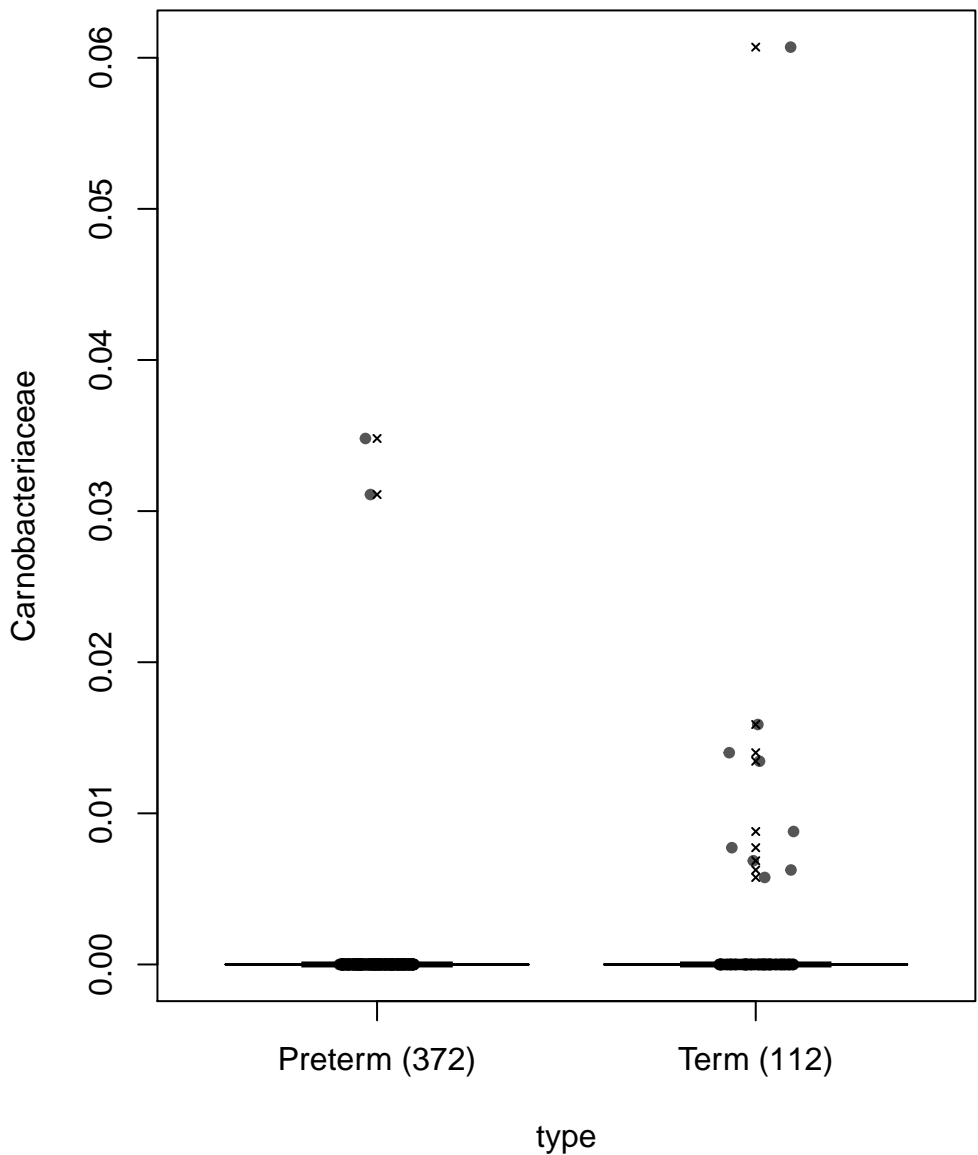

Partial Residual Plot

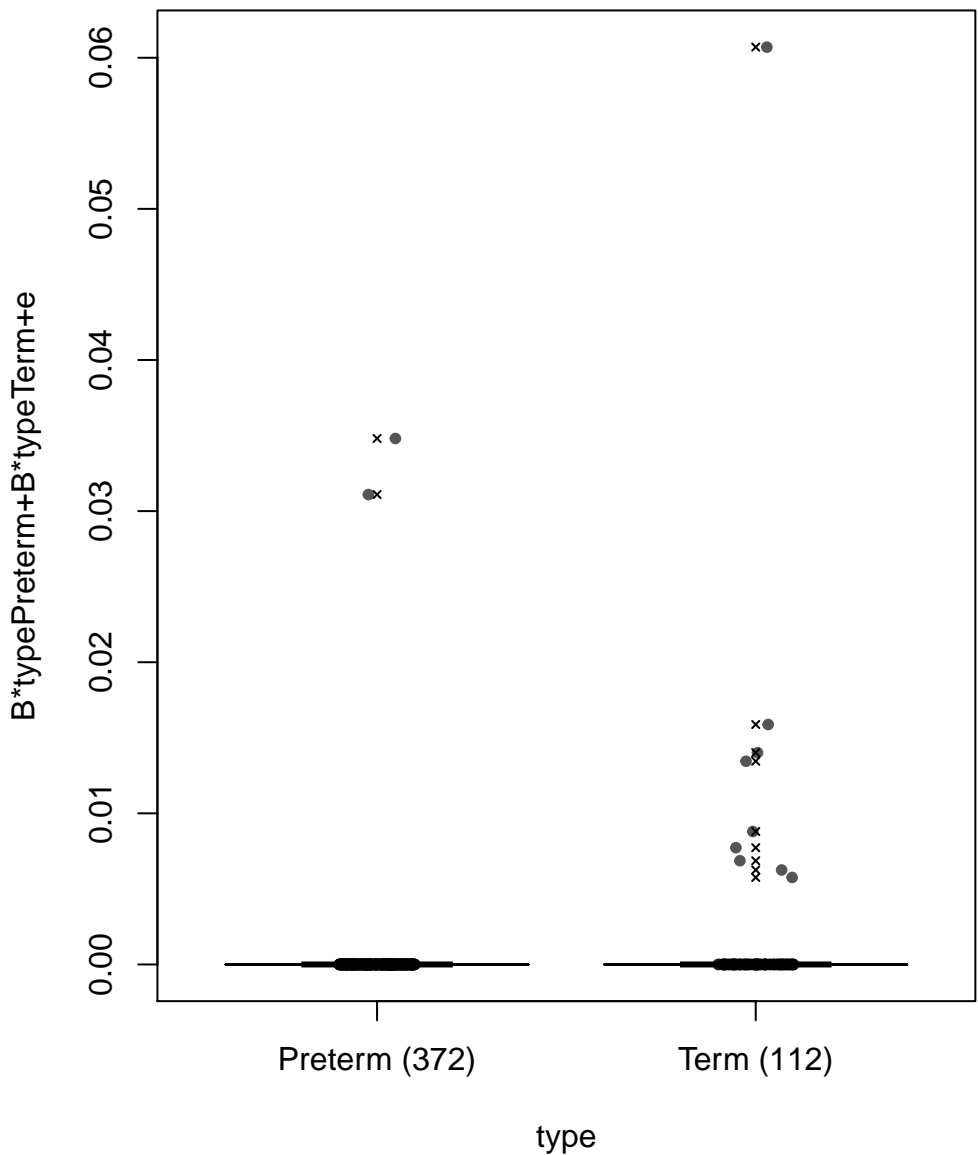

**typeTerm (0.00105 sd 0.000397, p=0.00818, q=0.0232)**

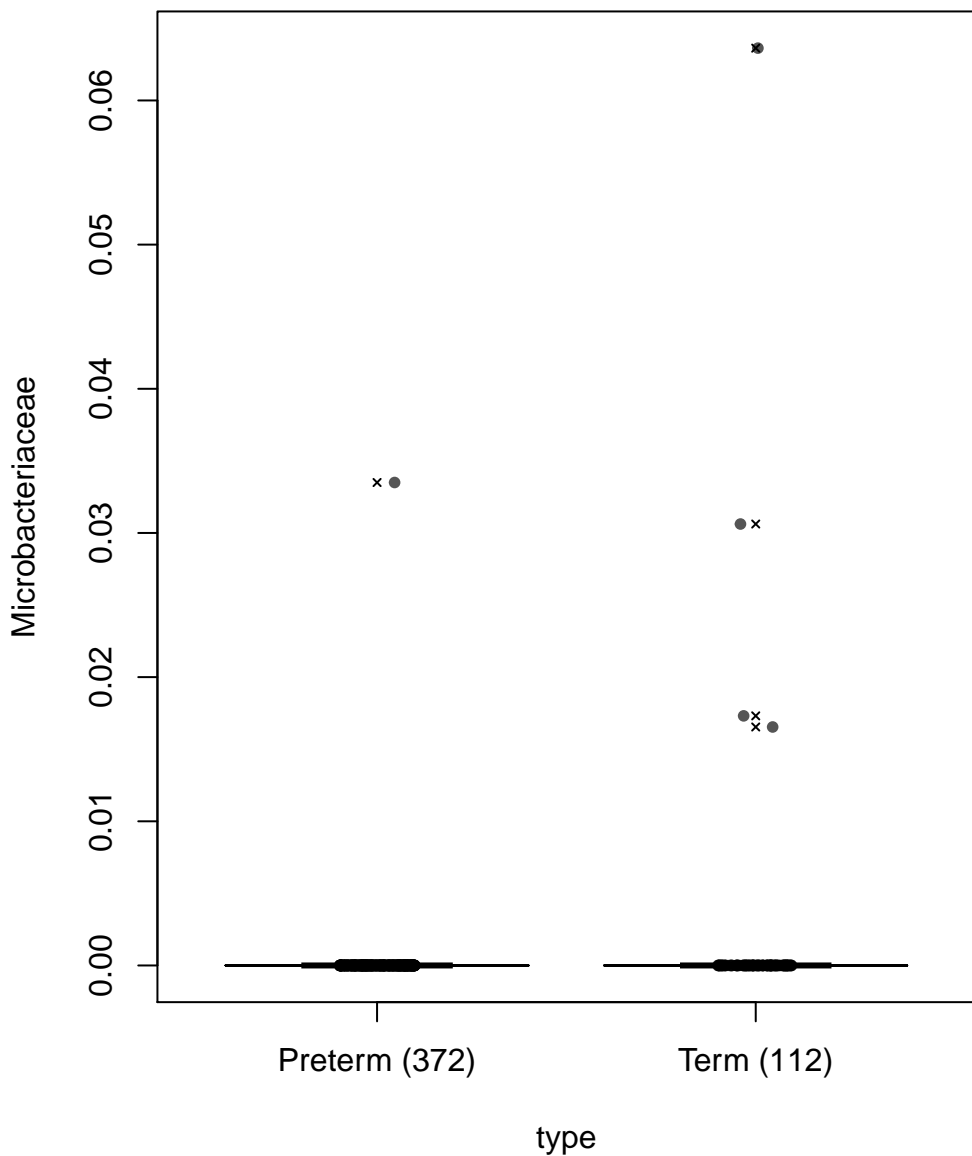

### Partial Residual Plot

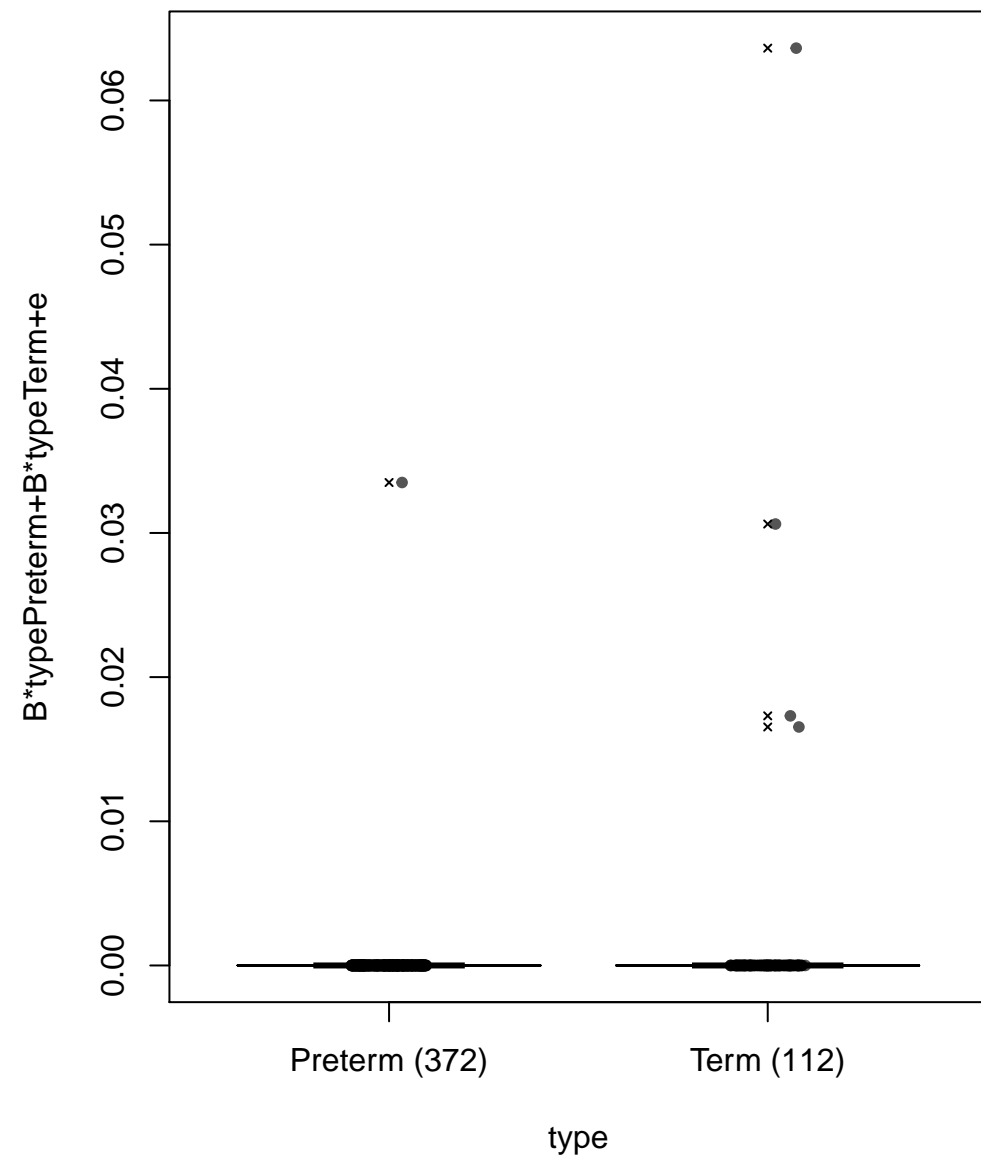

**typeTerm (0.00127 sd 0.000483, p=0.00897, q=0.0248)**

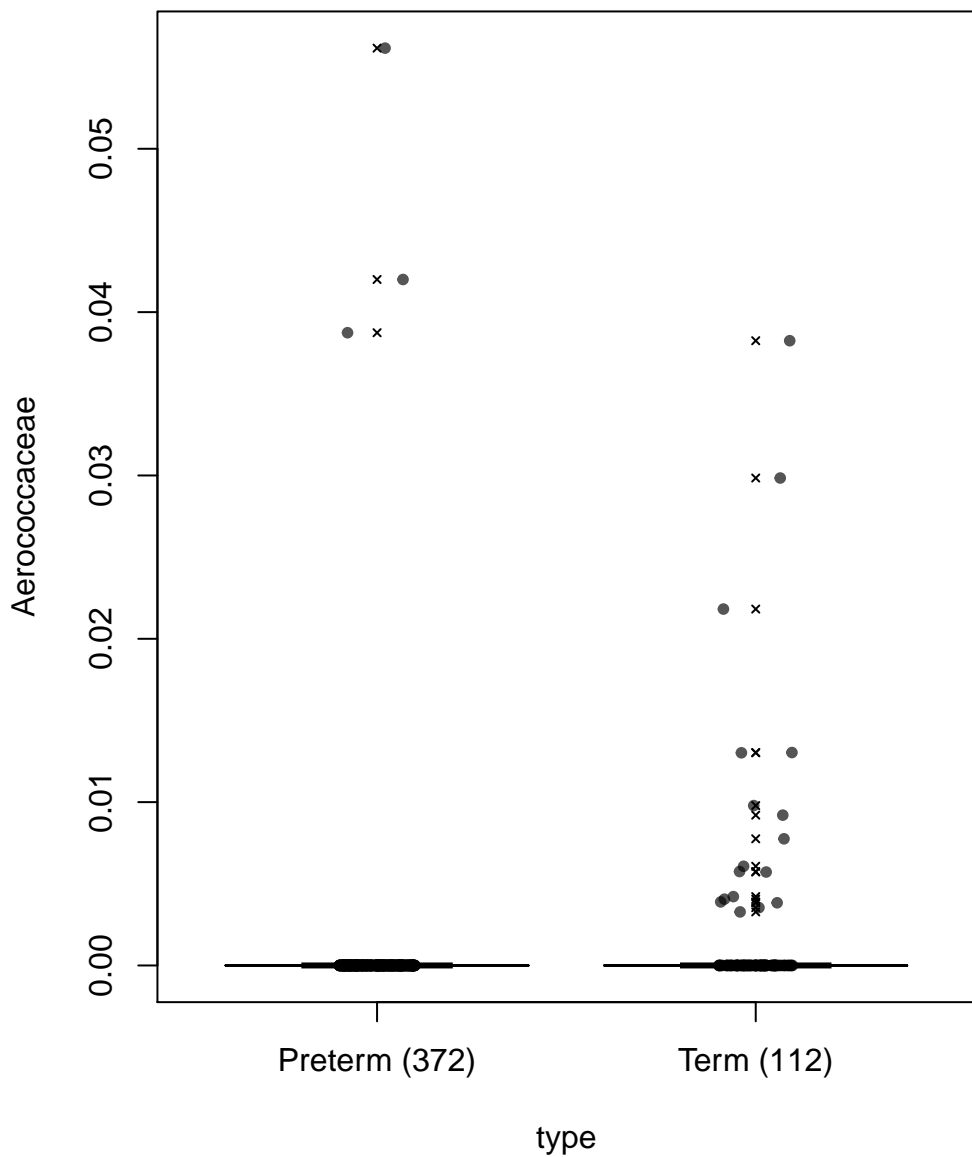

### Partial Residual Plot

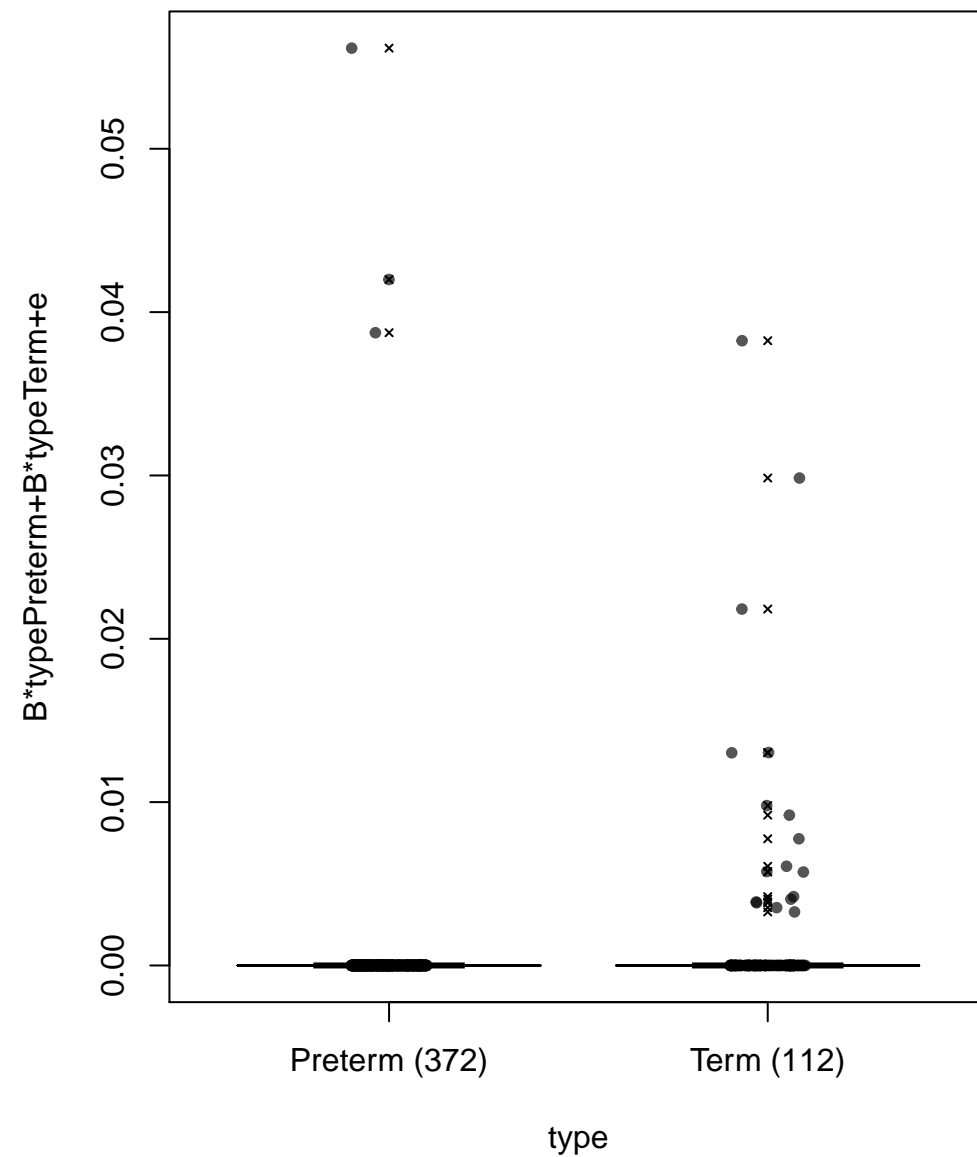

typeTerm (0.000343 sd 0.000132, p=0.00978, q=0.0265)

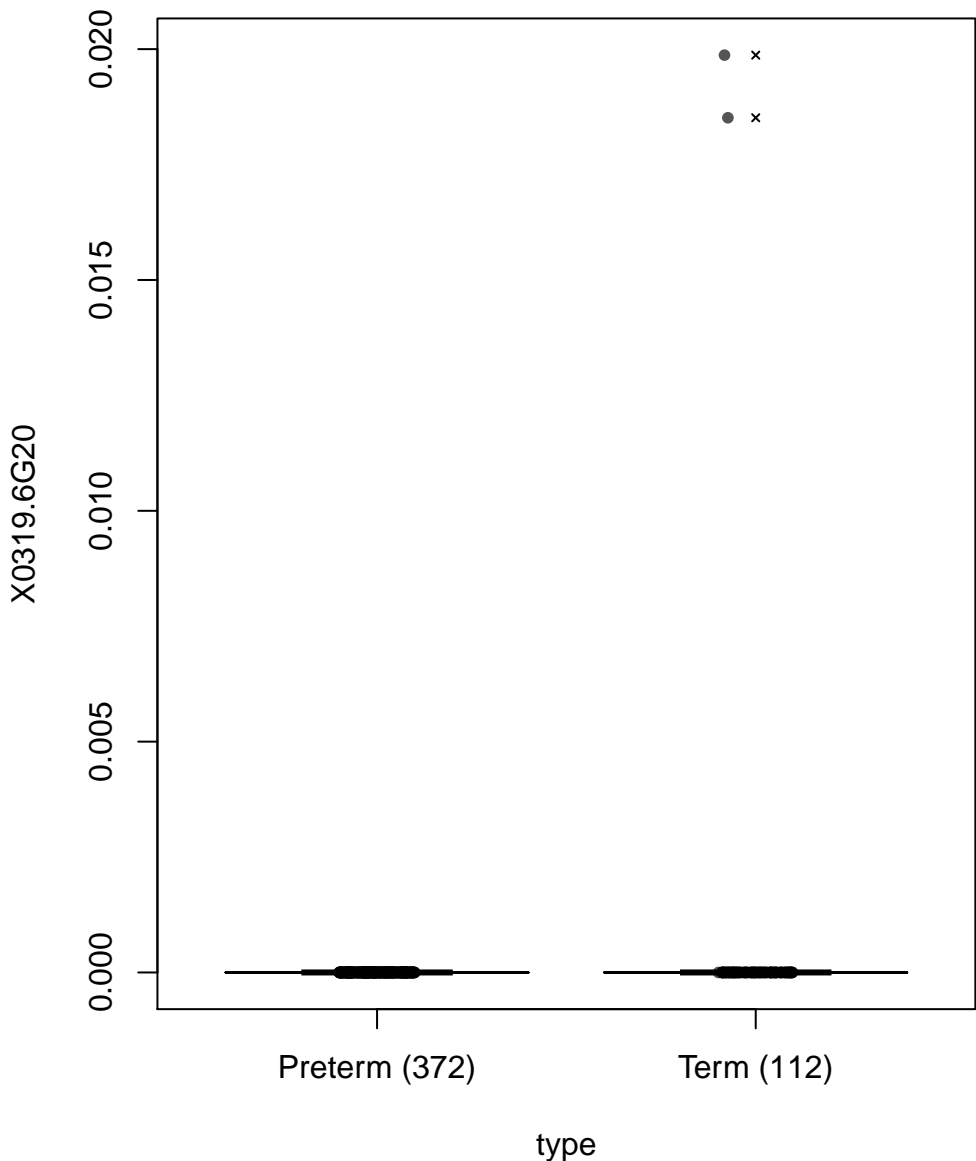

Partial Residual Plot

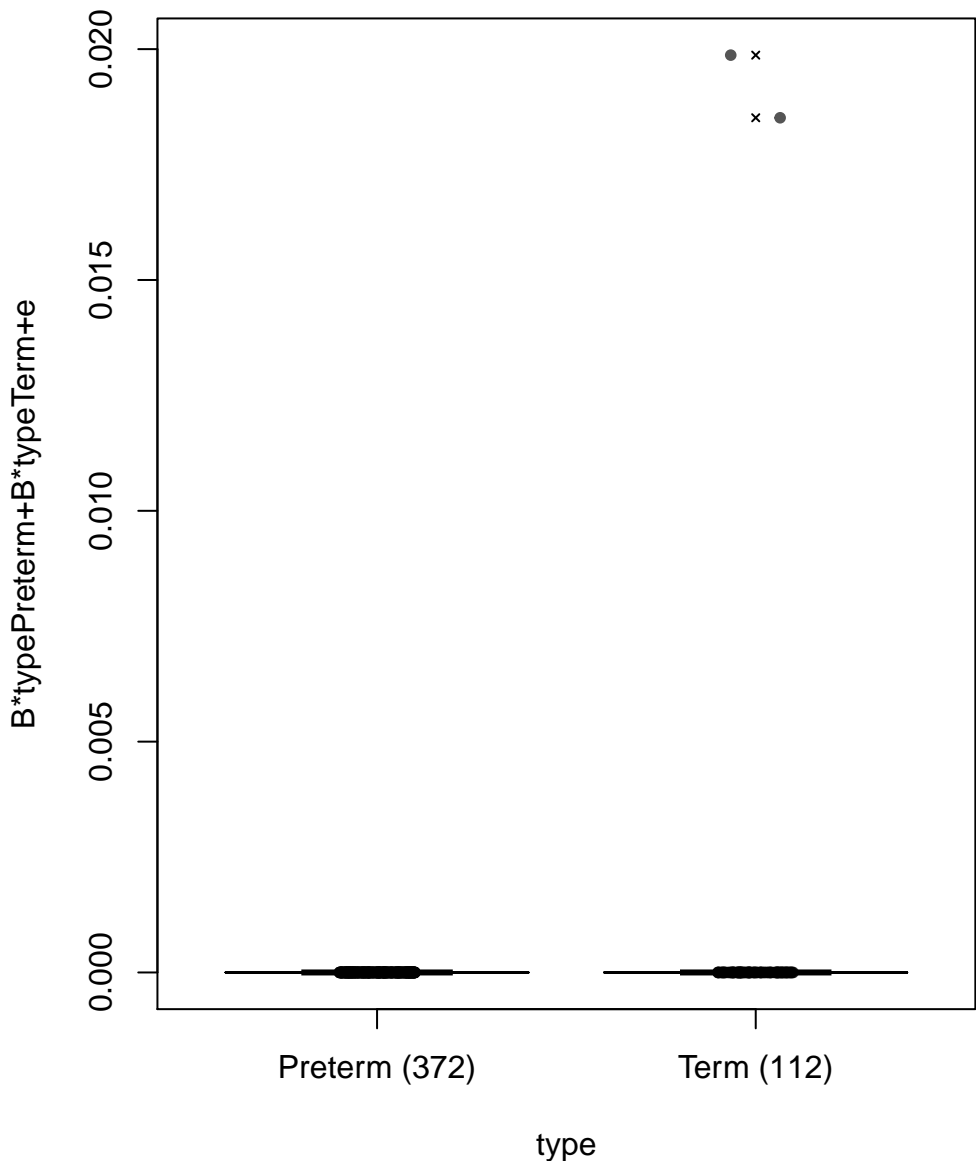

typeTerm (0.000185 sd 7.27e-05, p=0.0113, q=0.0299)

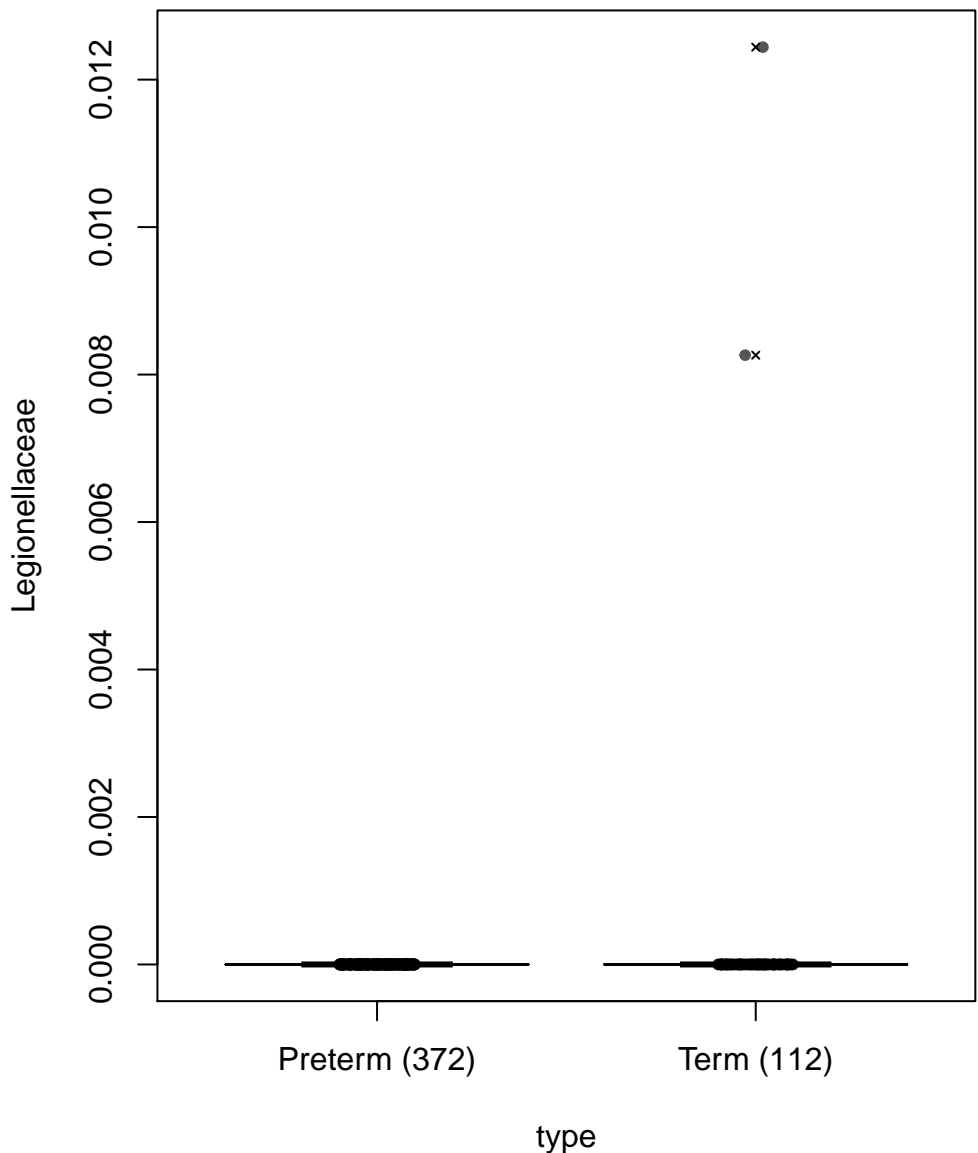

Partial Residual Plot

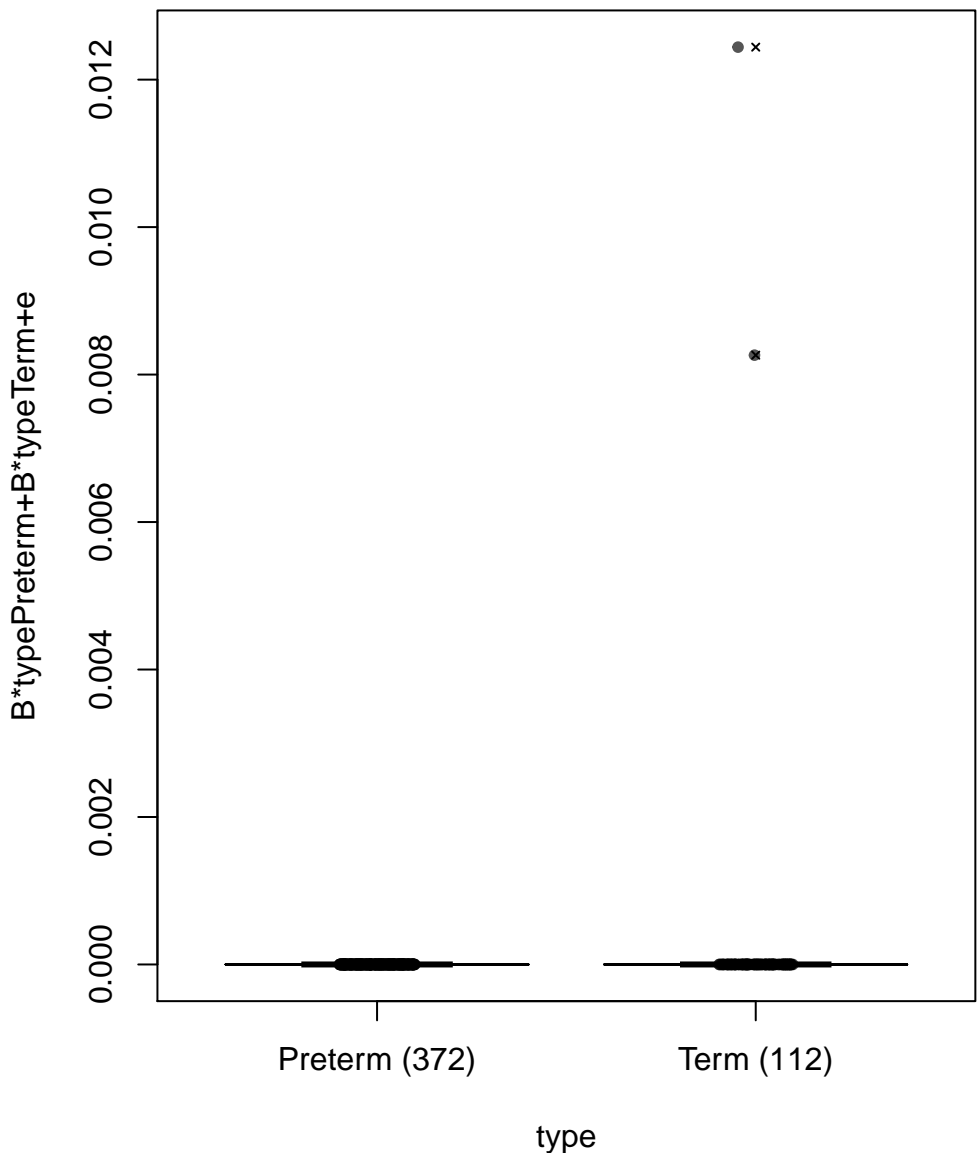

typeTerm (0.00152 sd 0.000611, p=0.0134, q=0.0346)

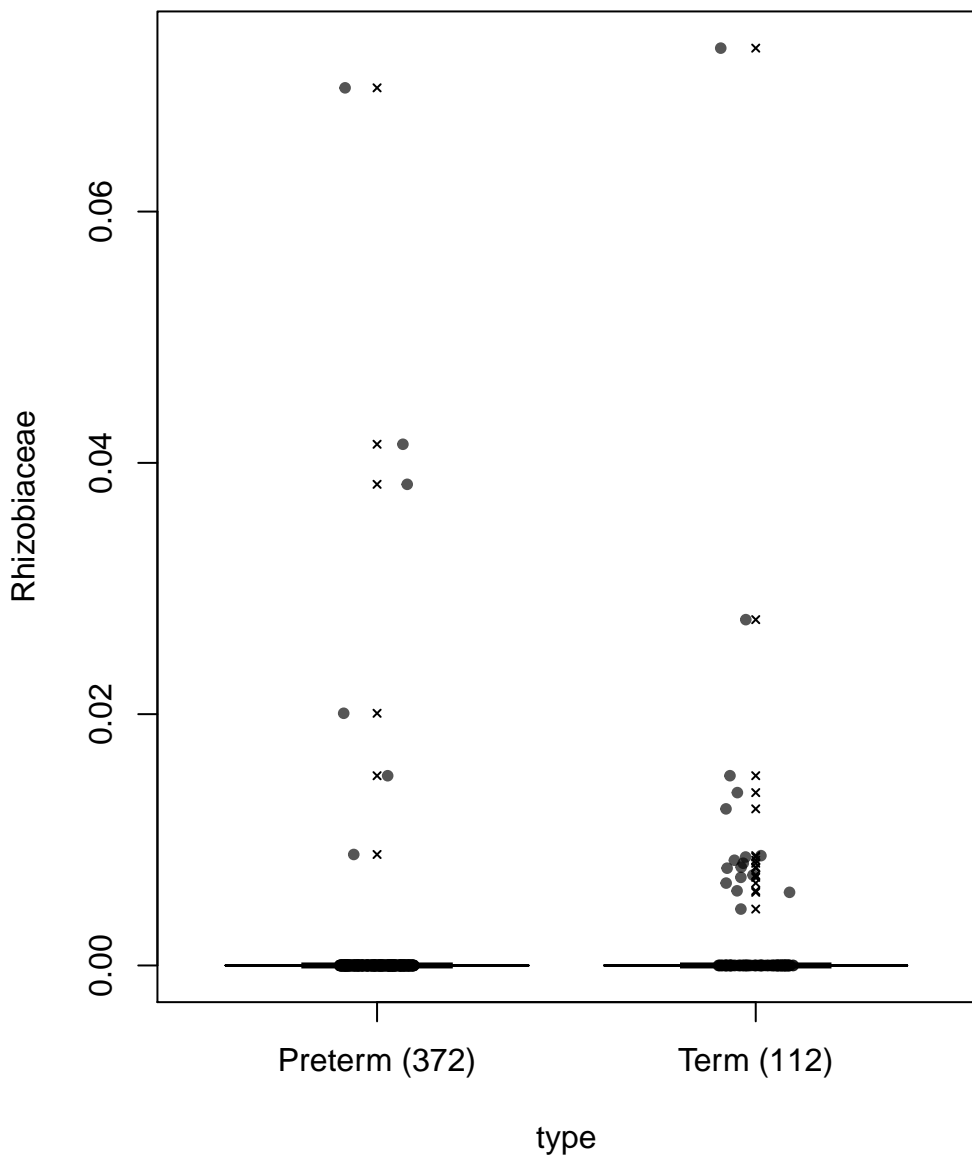

Partial Residual Plot

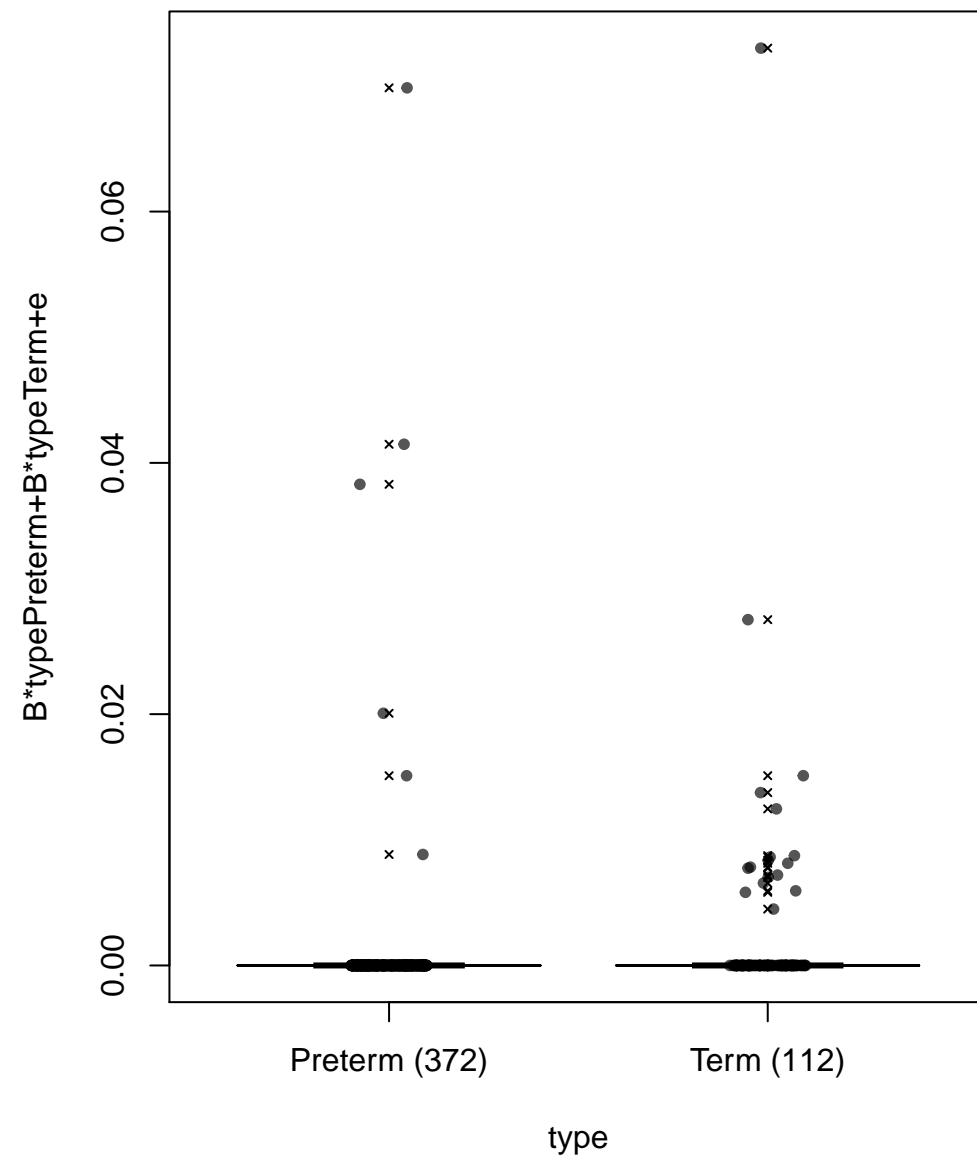

typeTerm (-0.0171 sd 0.00699, p=0.015, q=0.0379)

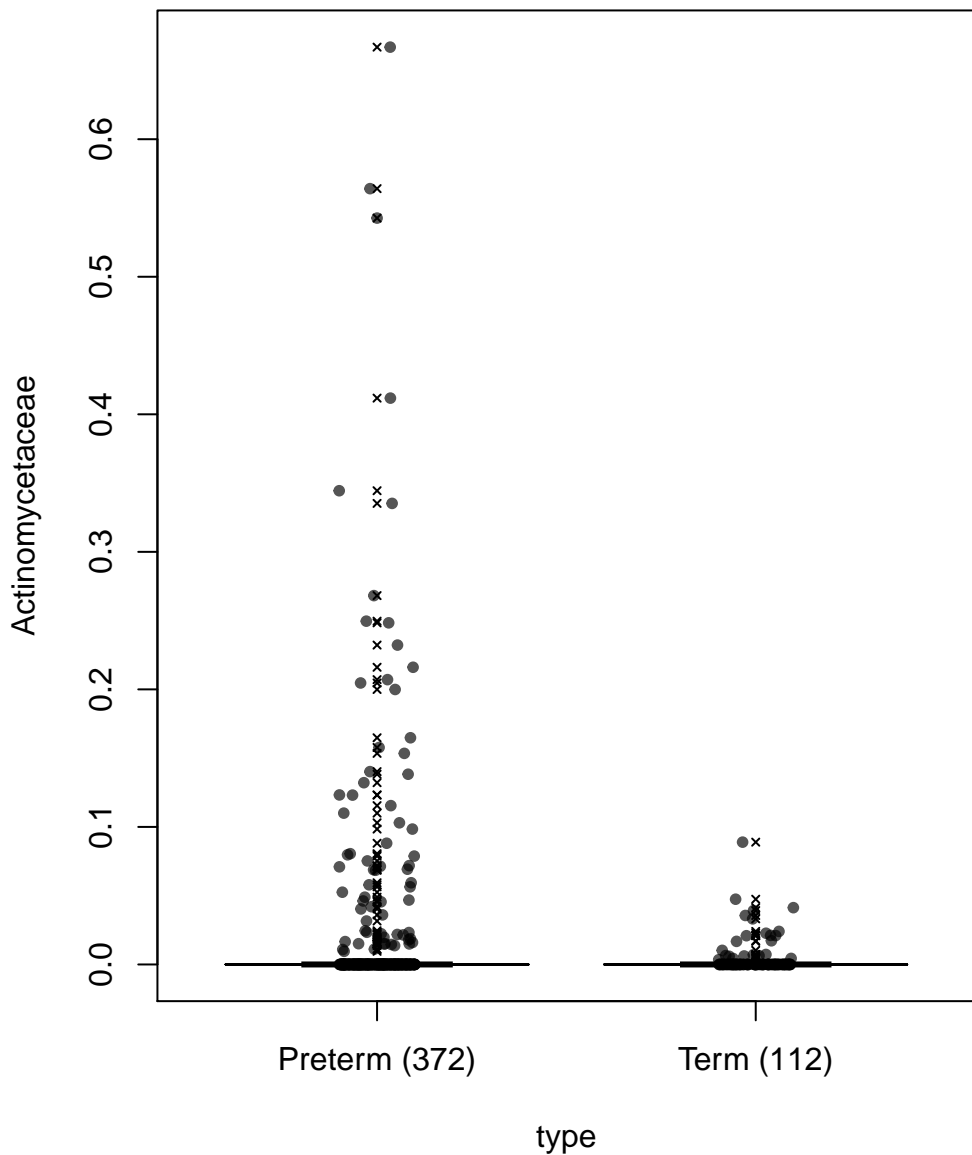

Partial Residual Plot

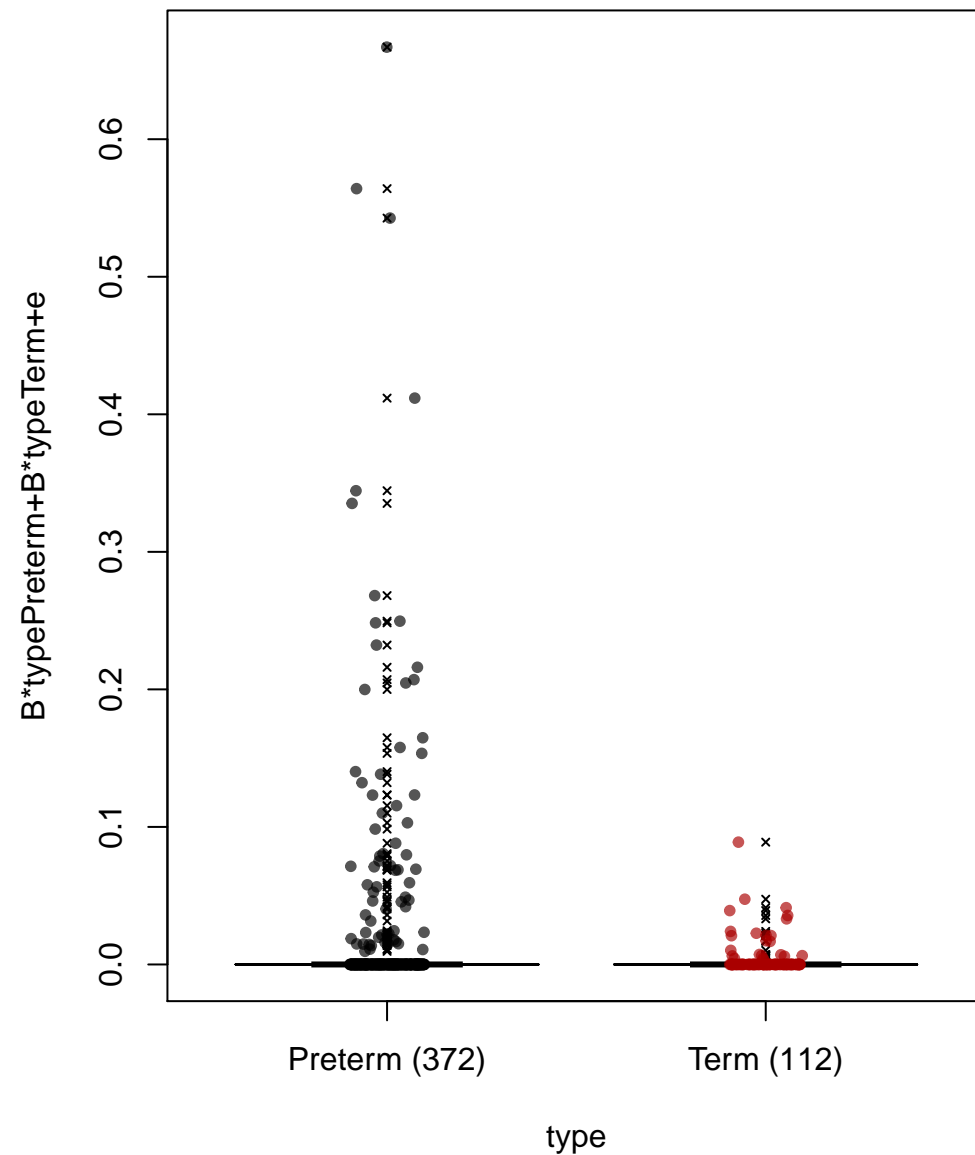



typeTerm (0.0273 sd 0.0114, p=0.0167, q=0.0415)

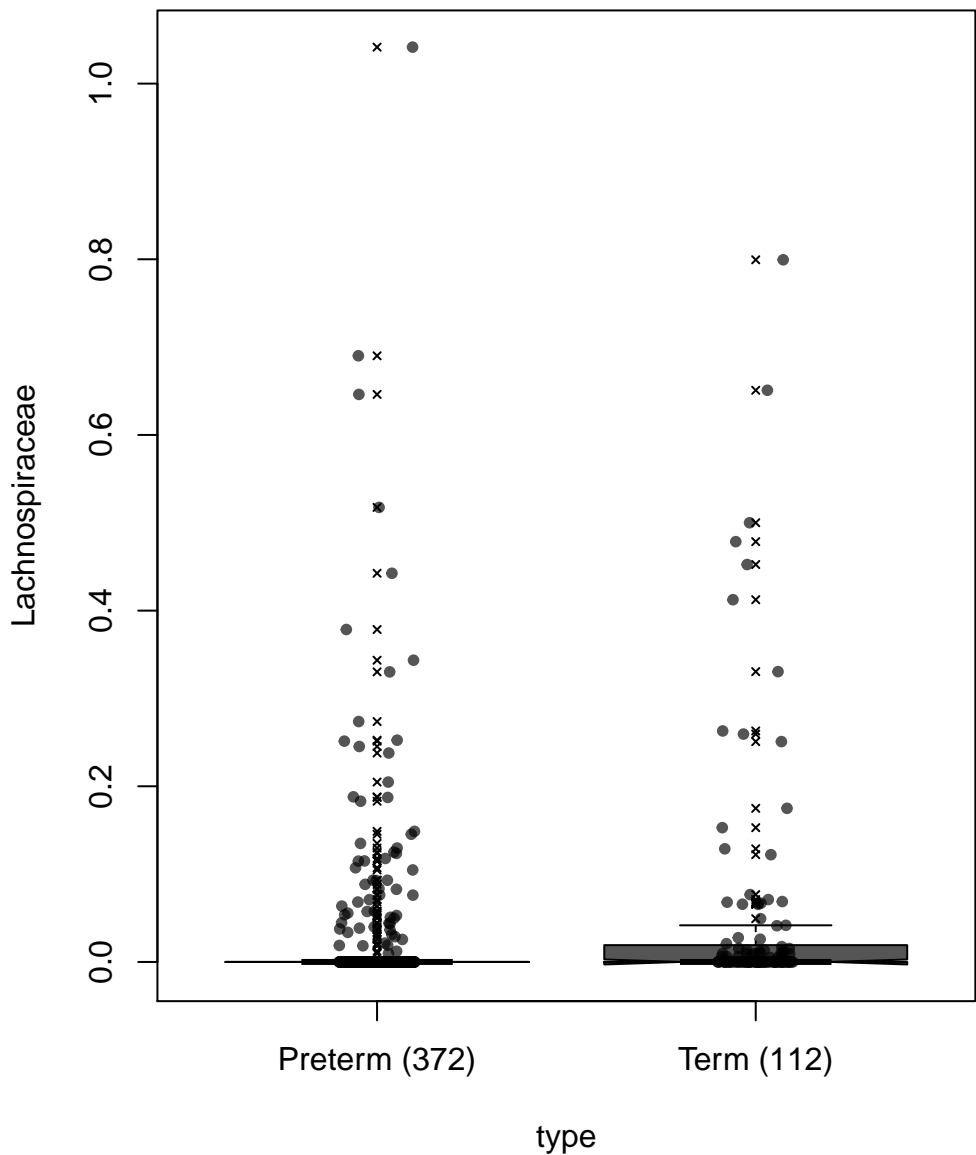

Partial Residual Plot

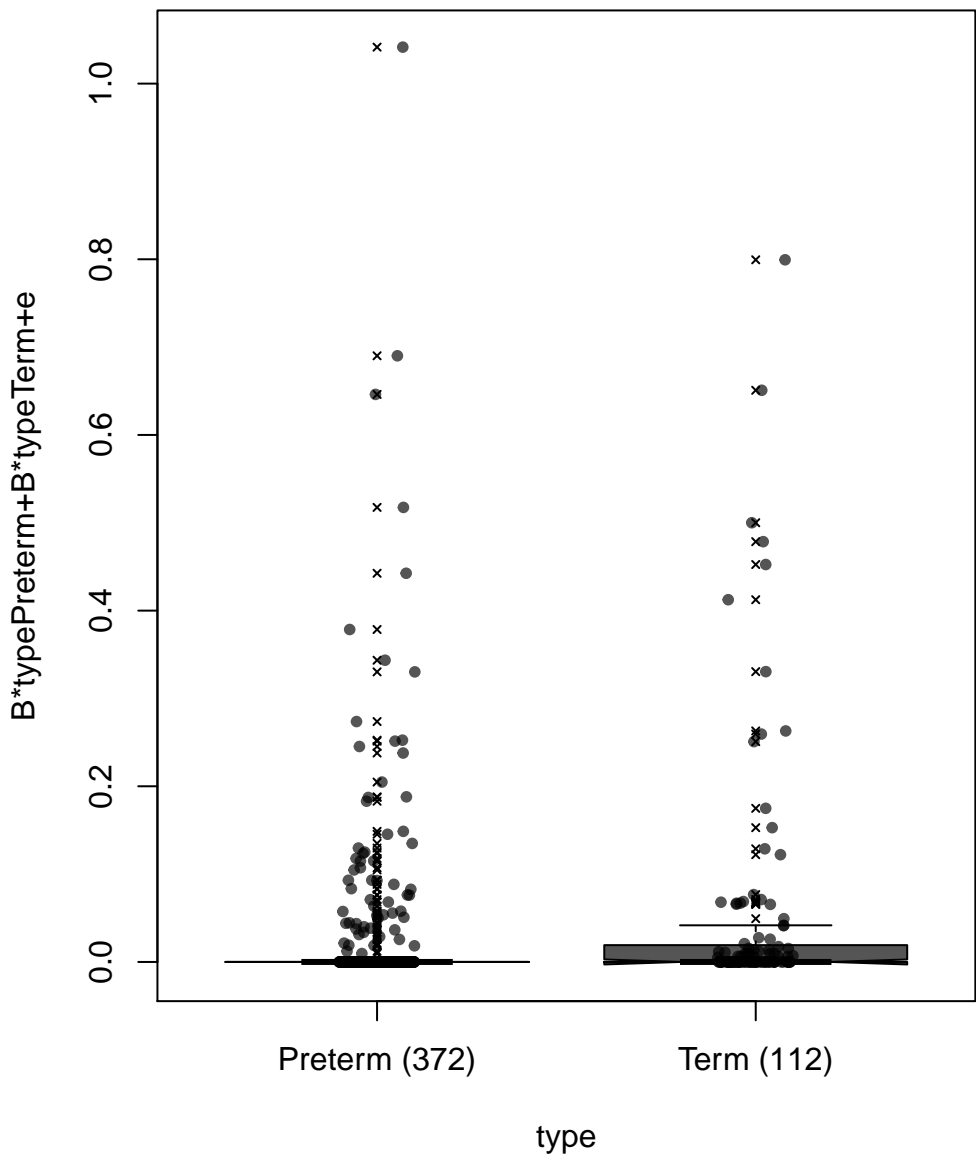

typeTerm (0.00443 sd 0.00189, p=0.0192, q=0.0466)

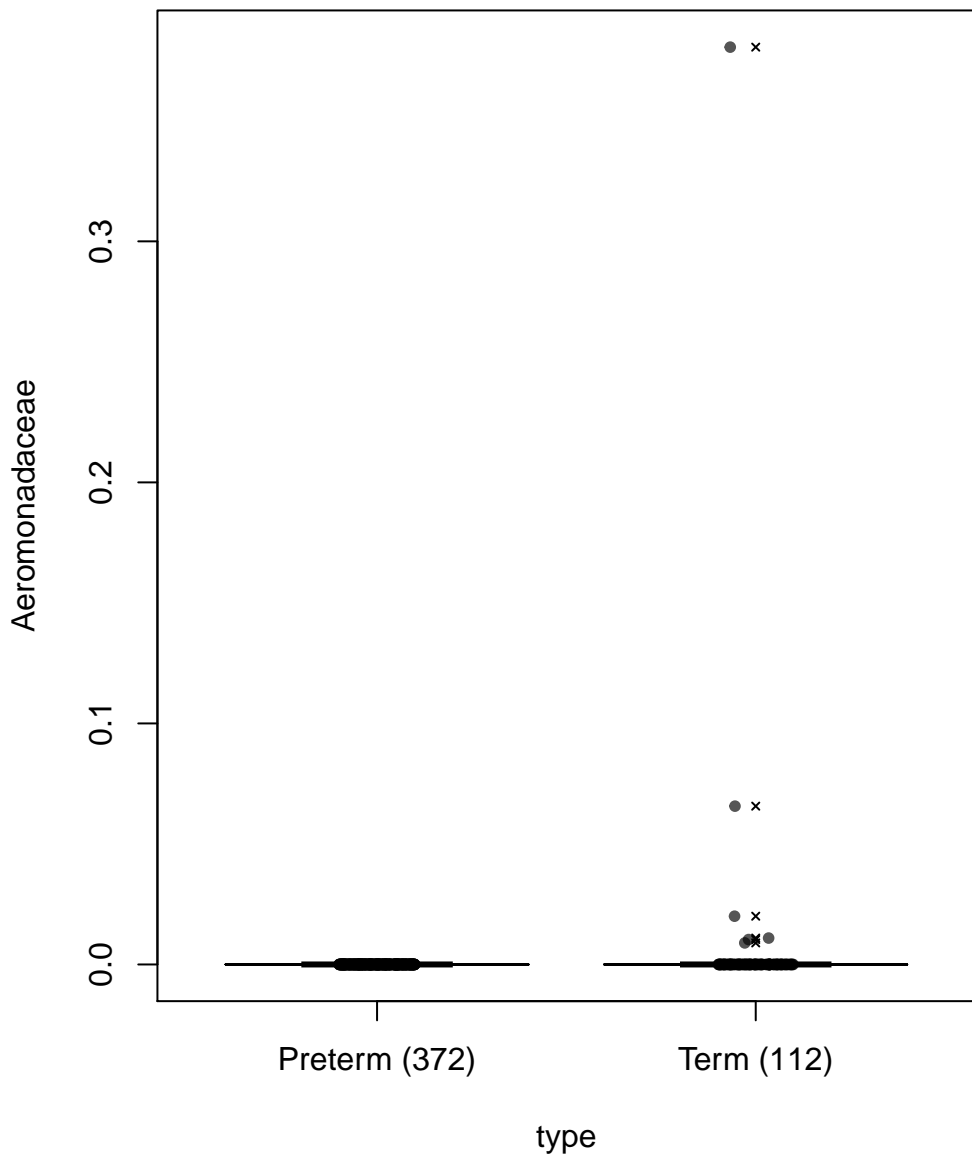

Partial Residual Plot

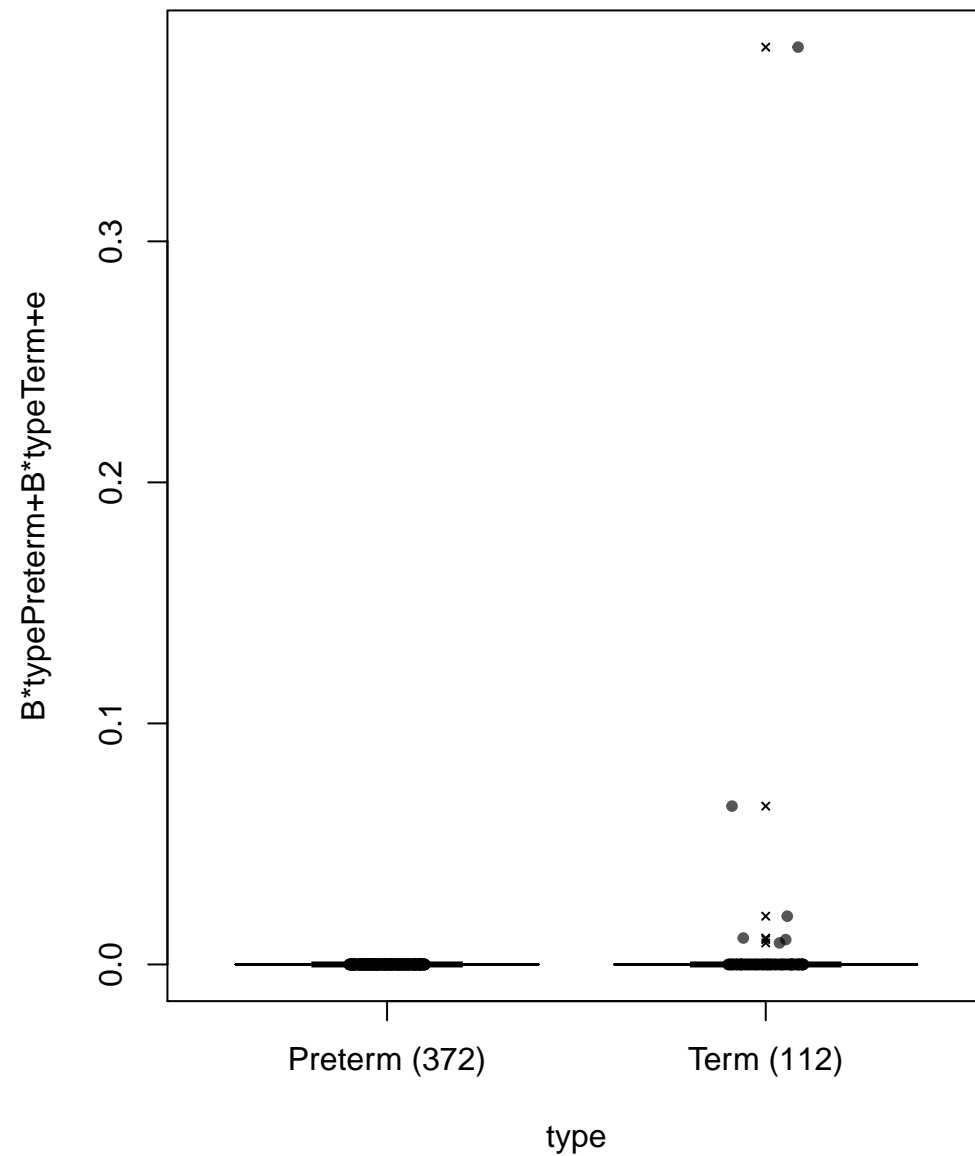

Supplement: s1 [file s1]
