# Supplementary material for: Predicted Metabolic Pathway Distributions in Stool Bacteria in Very-Low-Birth-Weight Infants: Potential Relationships with NICU Faltered Growth
Source: MDPI journal article supplement (doi:10.3390/nu12051345), 2020-05-08

## Supplementary data

Metabolic Pathway Distributions in Very Low Birth Weight Infants:  
Potential Relationships with NICU Faltered Growth

**S4. Association of the relative abundance of bacterial KEGG pathways to the VLBW infants and term infants.** Each page of this file shows a separate pathway which was significantly different between the two groups. The box plots indicate the association of the metadata (here, the two groups preterm and term infants) with the relative abundances. The strength of association is indicated by the p-value and an FDR-corrected q-value. The partial residual plot shows the relationship between the groups with abundances when all other variables are included in the model.

classTerm (0.000277 sd 1.2e-05, p=7.56e-80, q=2.02e-78)

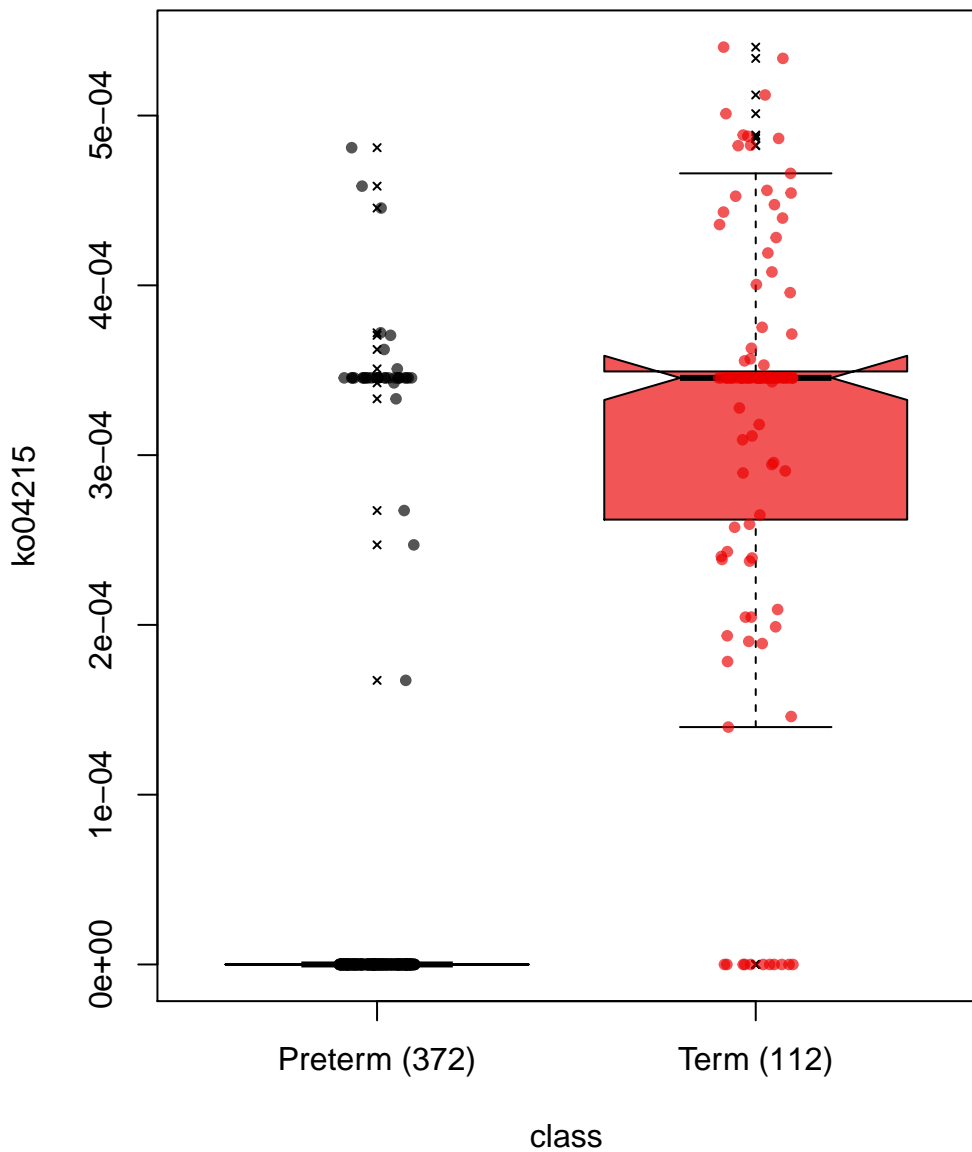

Partial Residual Plot

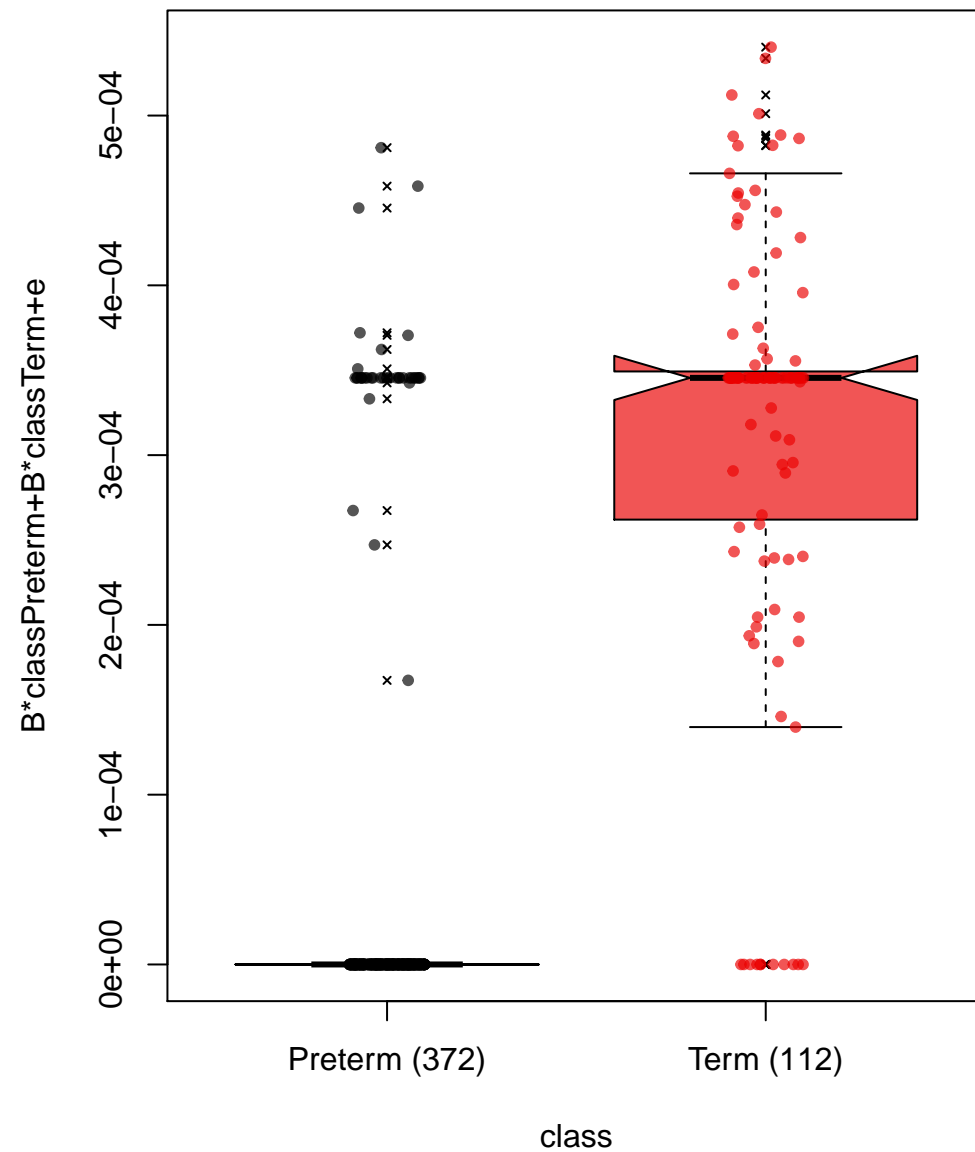

classTerm (0.000277 sd 1.2e-05, p=7.56e-80, q=2.02e-78)

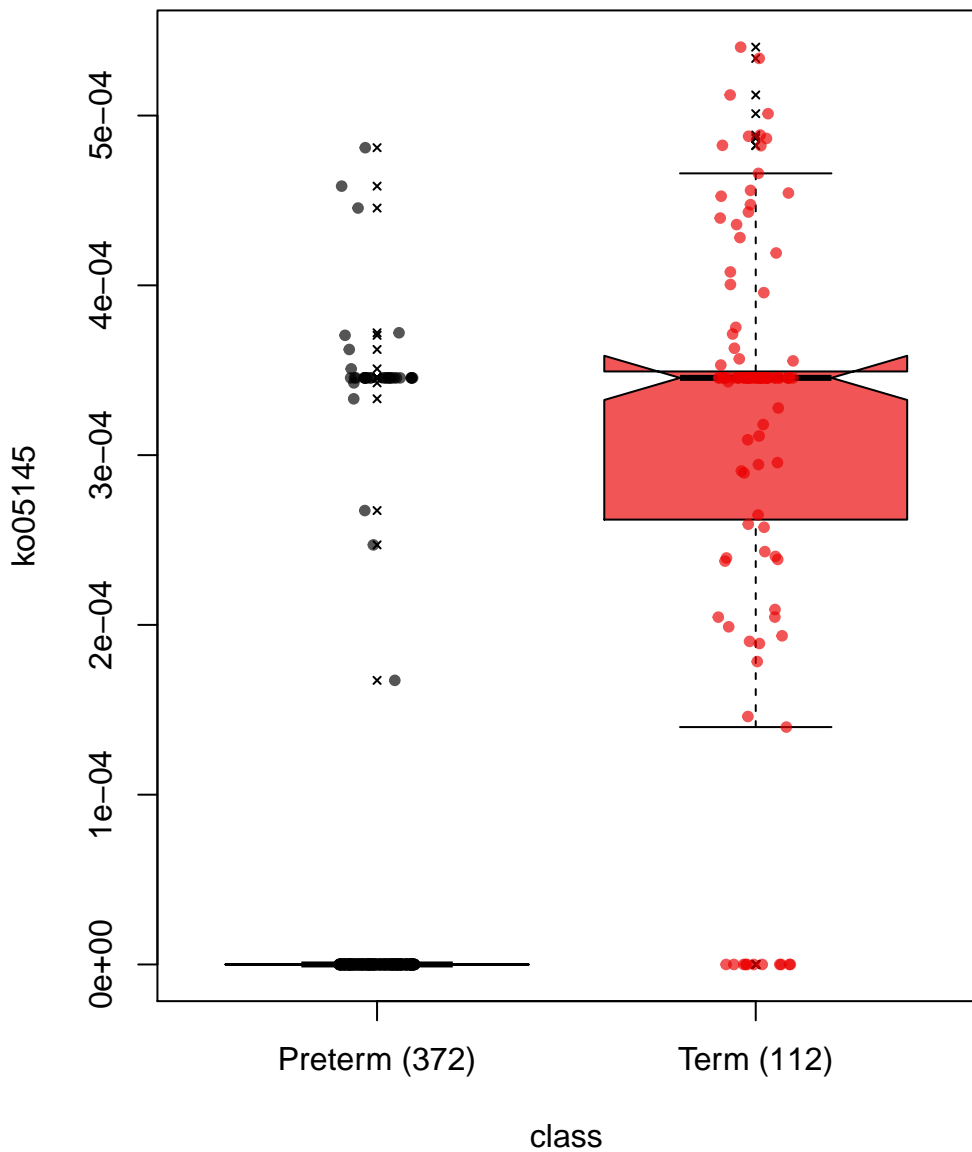

Partial Residual Plot

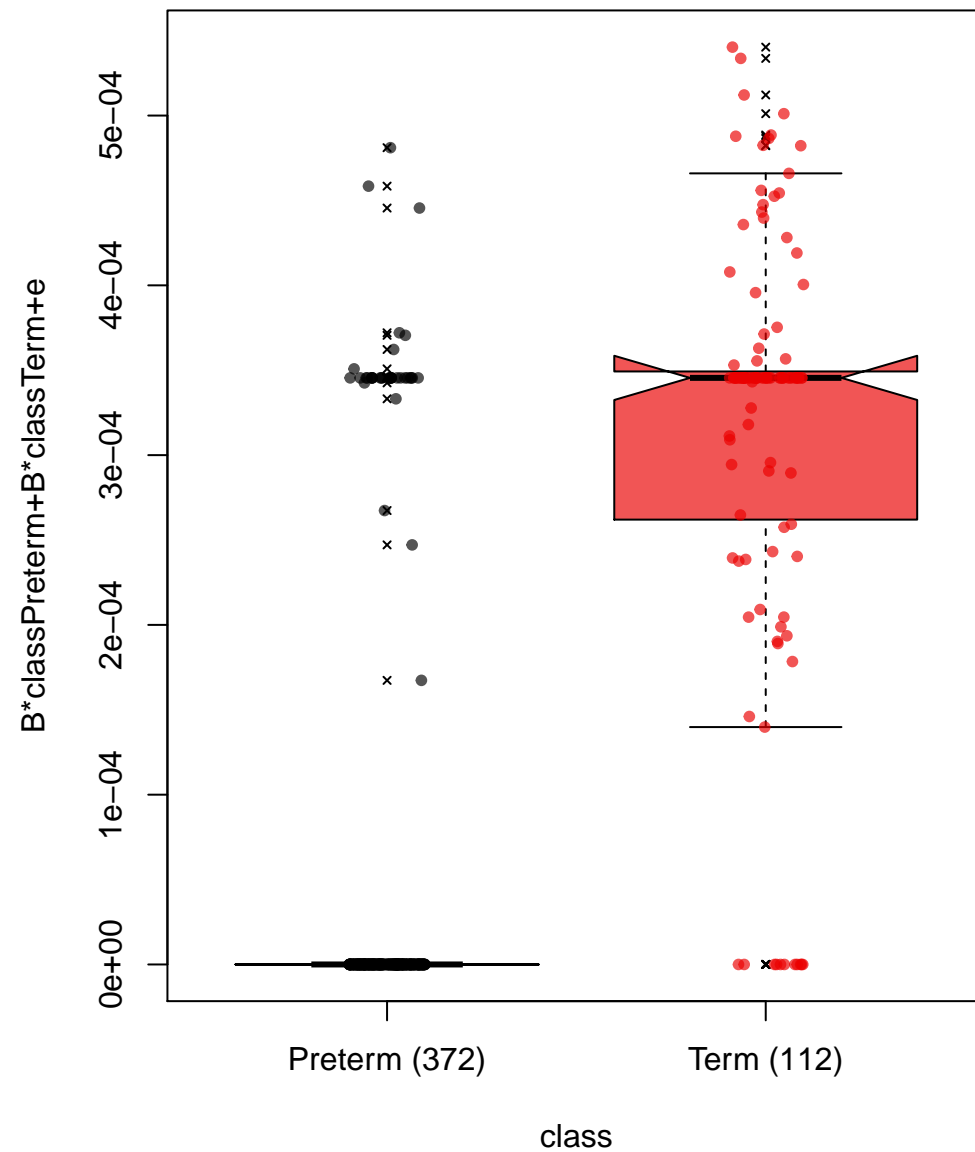

classTerm (0.000277 sd 1.2e-05, p=7.56e-80, q=2.02e-78)

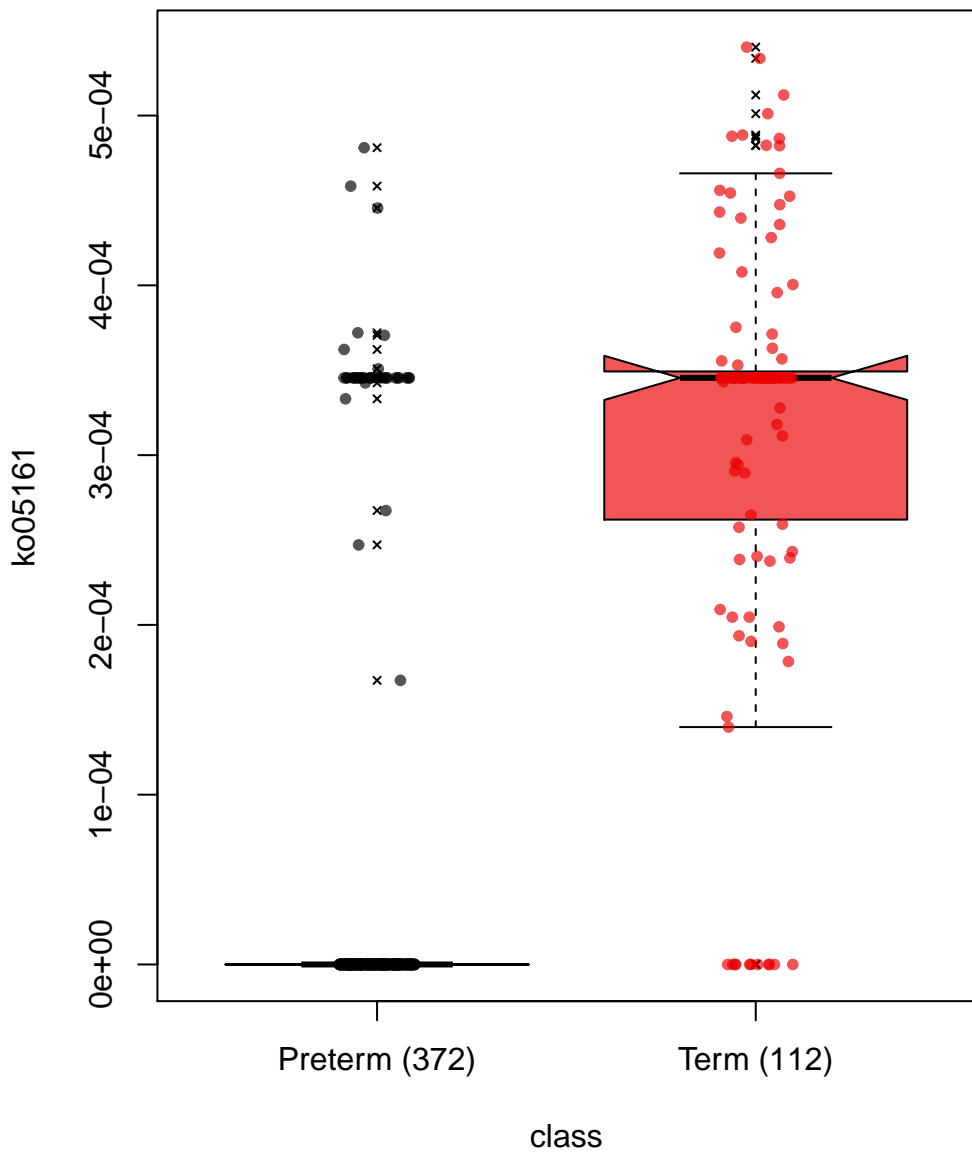

Partial Residual Plot

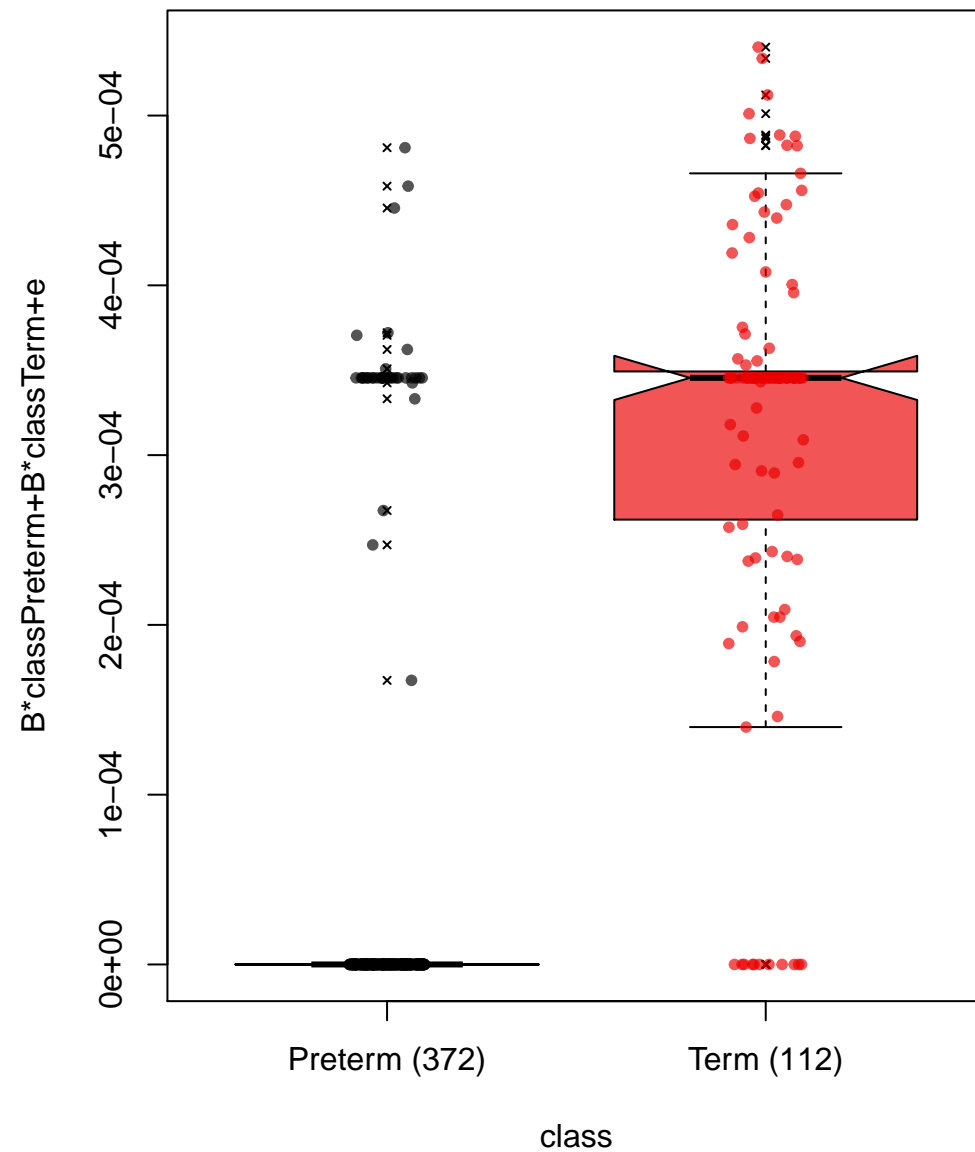



classTerm (0.000277 sd 1.2e-05, p=7.56e-80, q=2.02e-78)

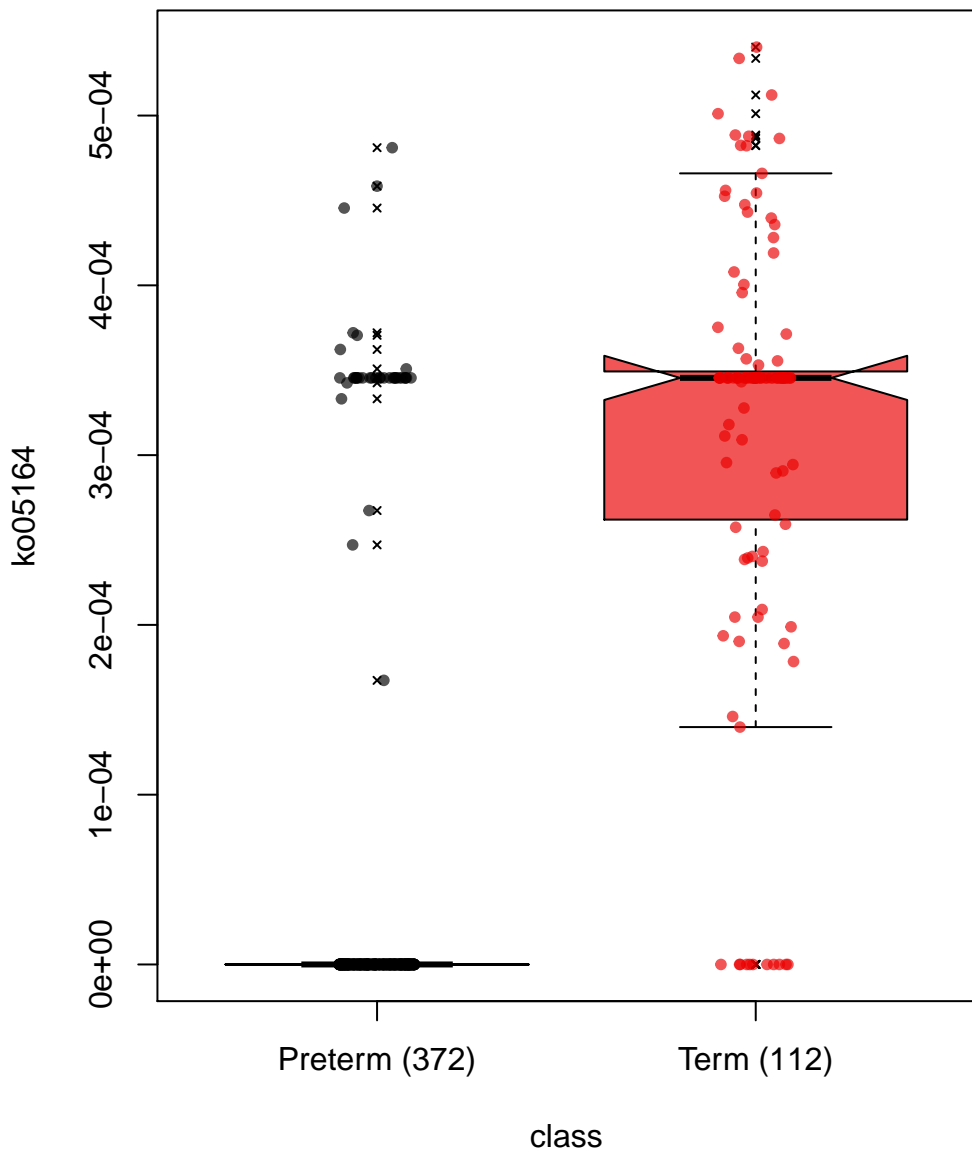

Partial Residual Plot

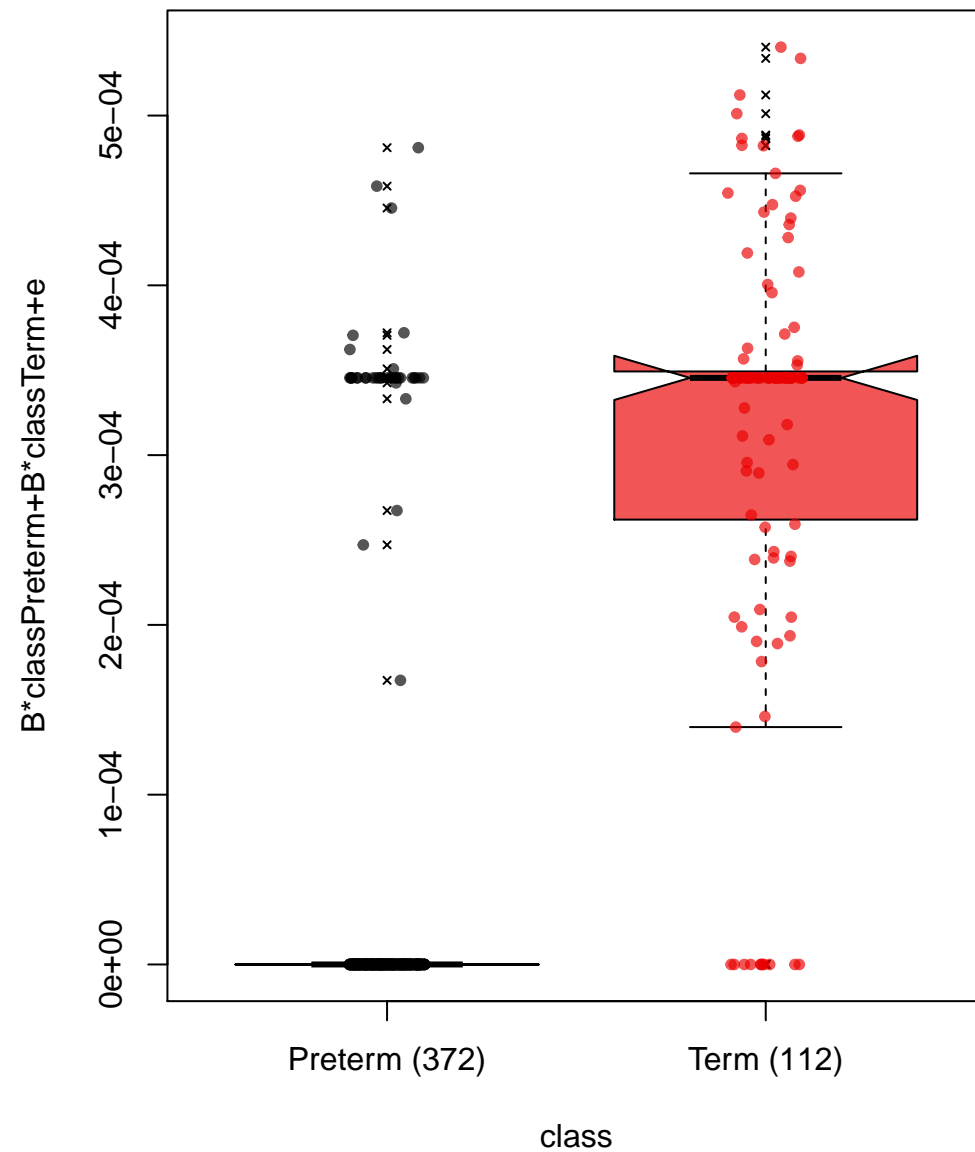

classTerm (0.000277 sd 1.2e-05, p=7.56e-80, q=2.02e-78)

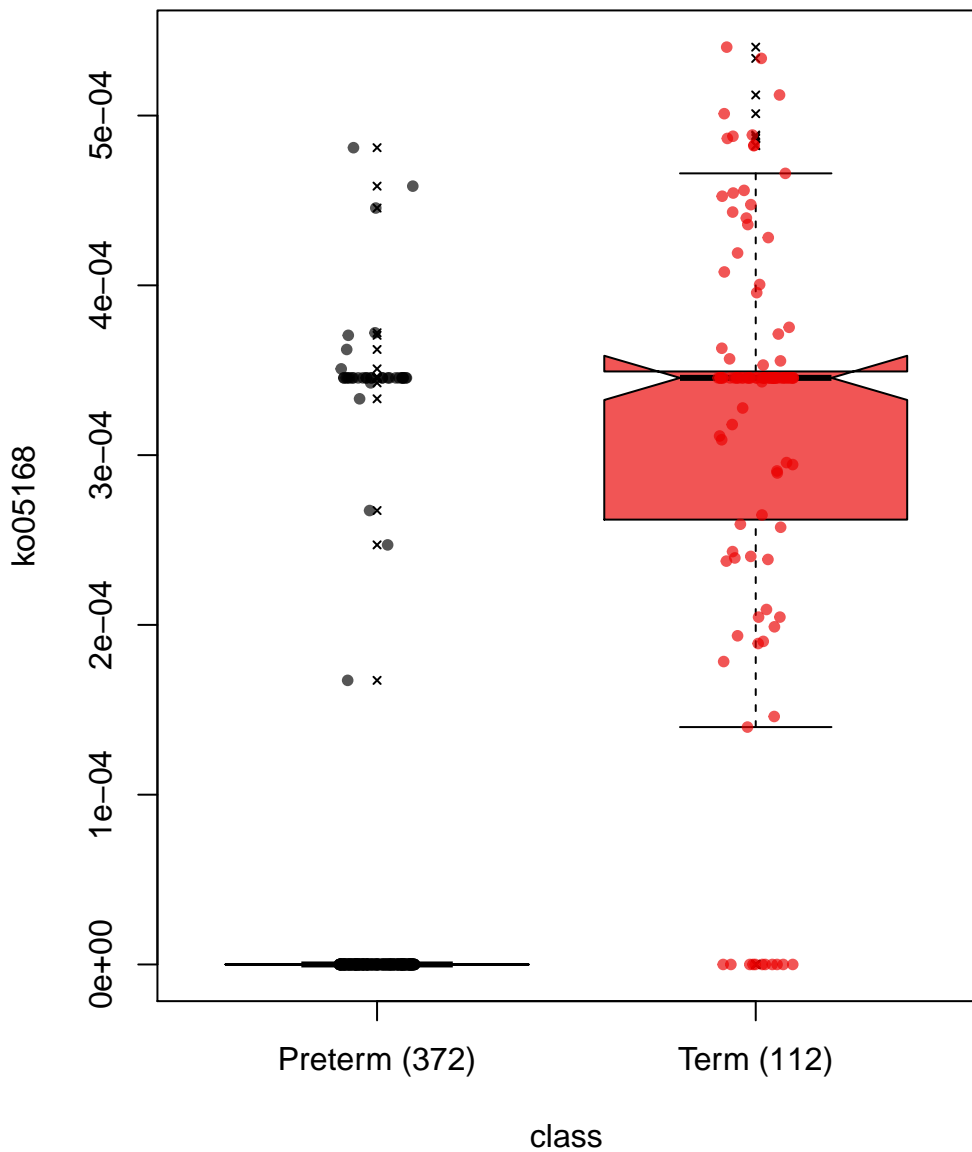

Partial Residual Plot

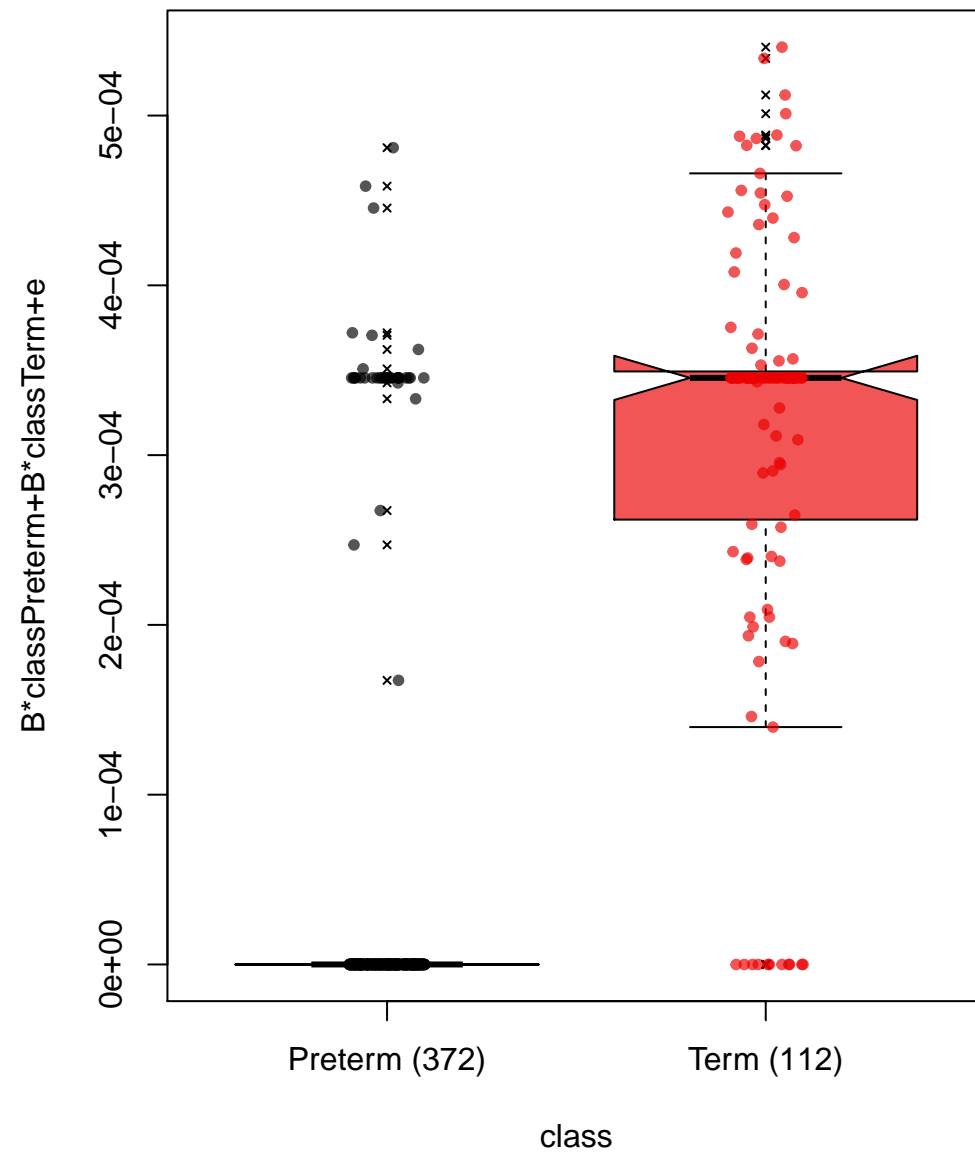

classTerm (0.000277 sd 1.2e-05, p=7.56e-80, q=2.02e-78)

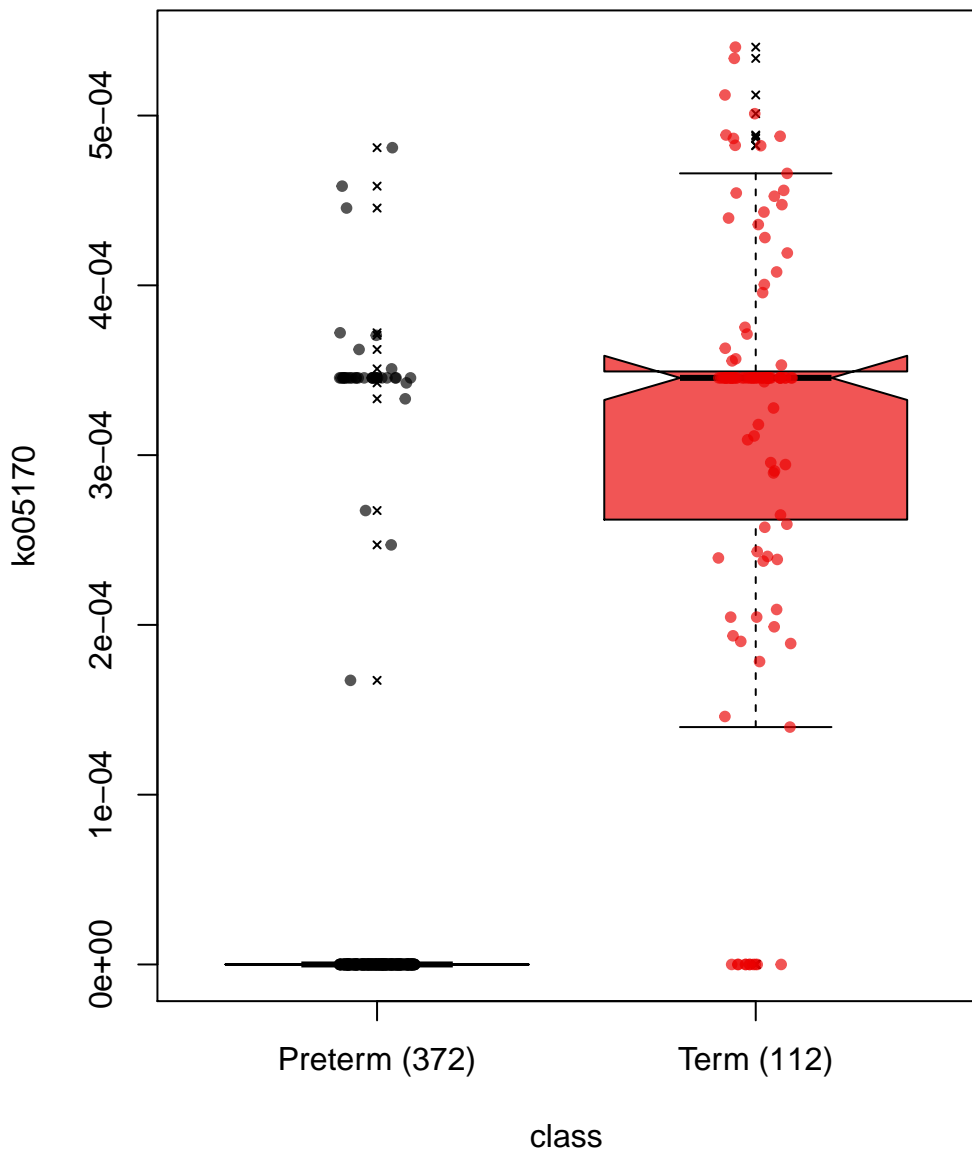

Partial Residual Plot

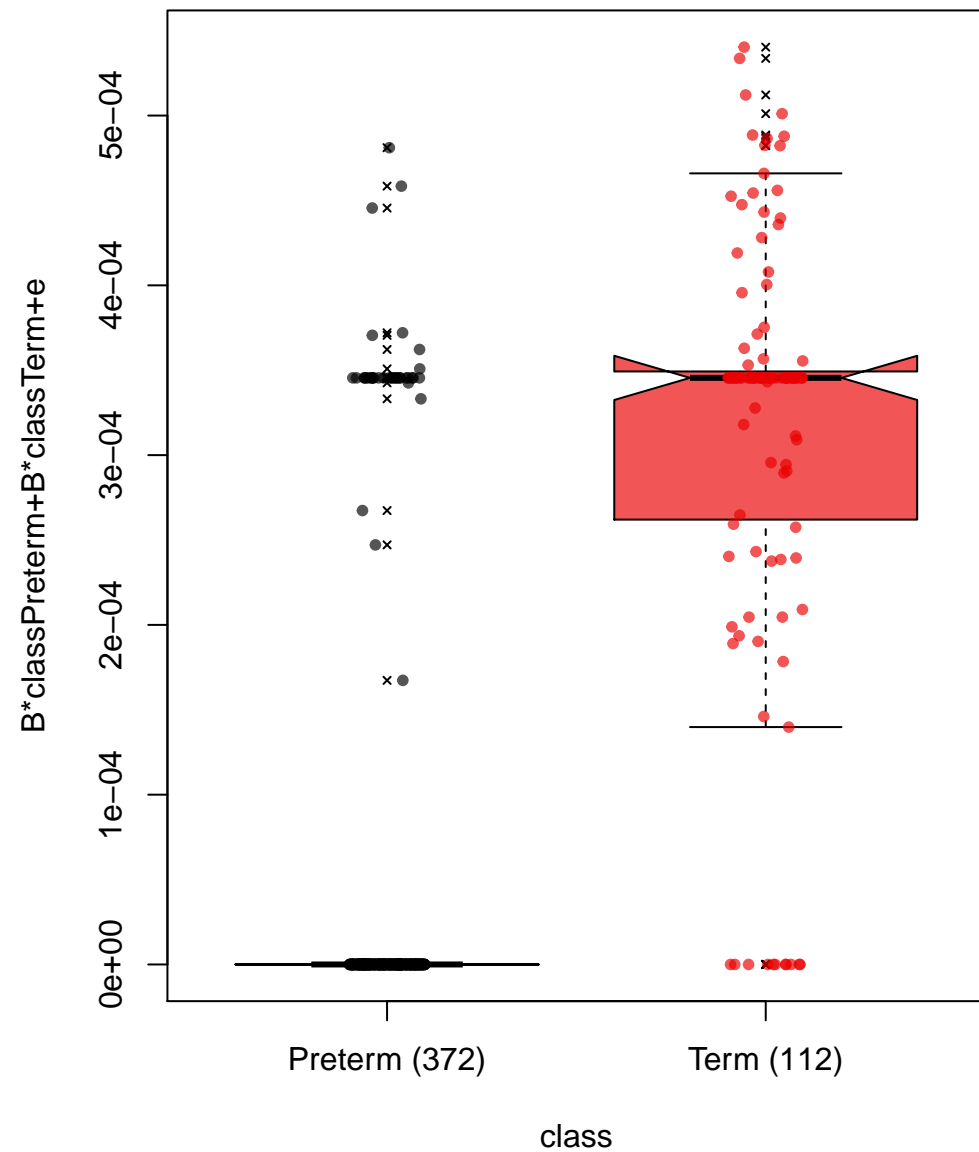

classTerm (0.000277 sd 1.2e-05, p=7.56e-80, q=2.02e-78)

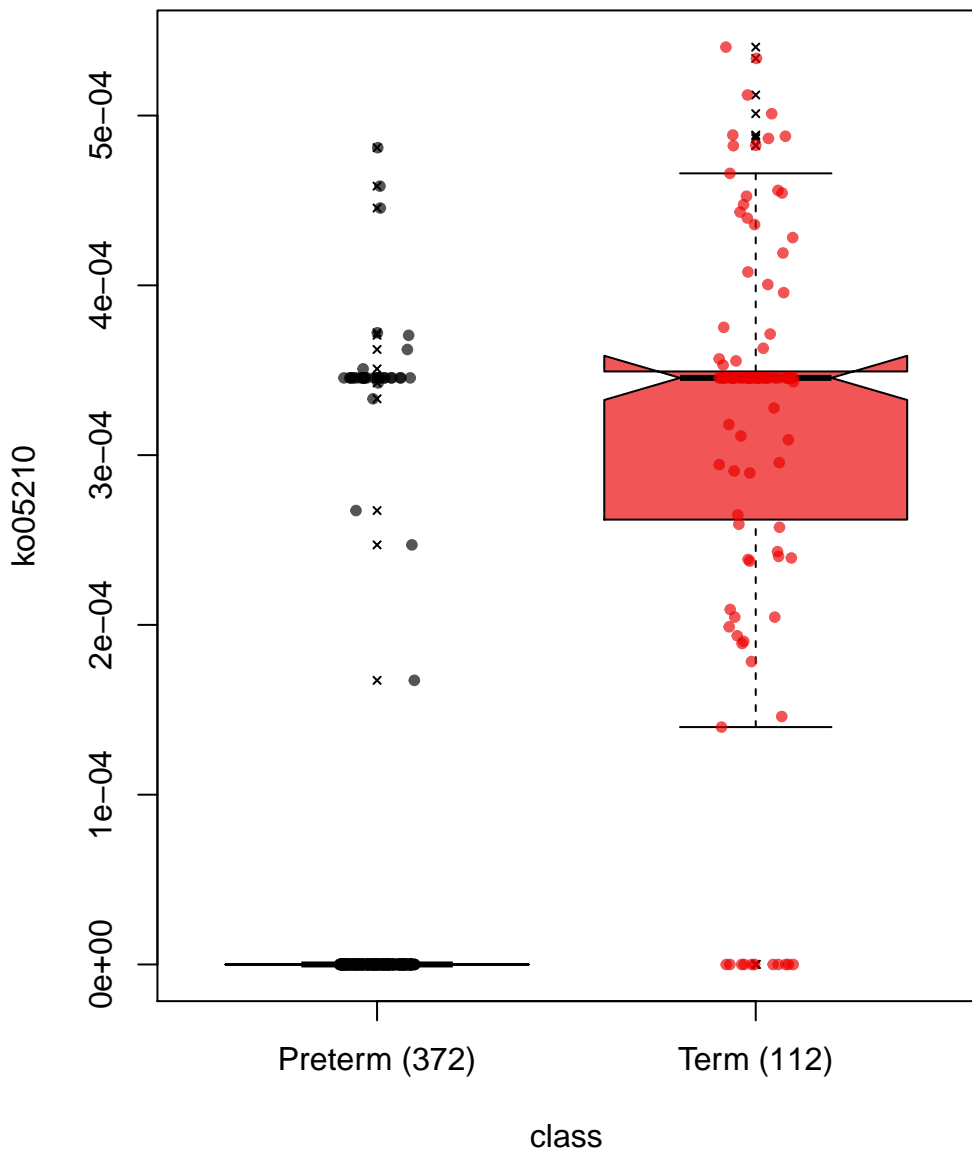

Partial Residual Plot

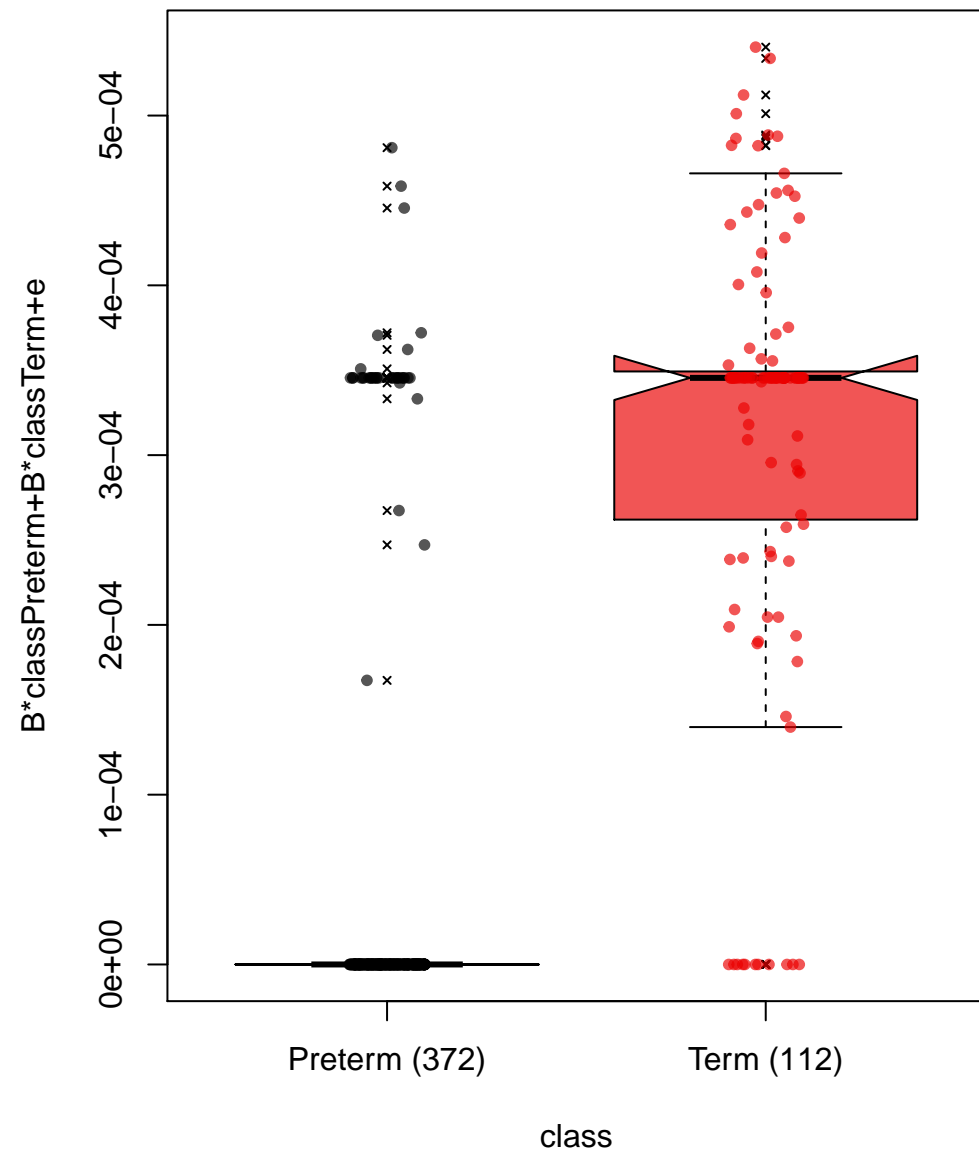

classTerm (0.000277 sd 1.2e-05, p=7.56e-80, q=2.02e-78)

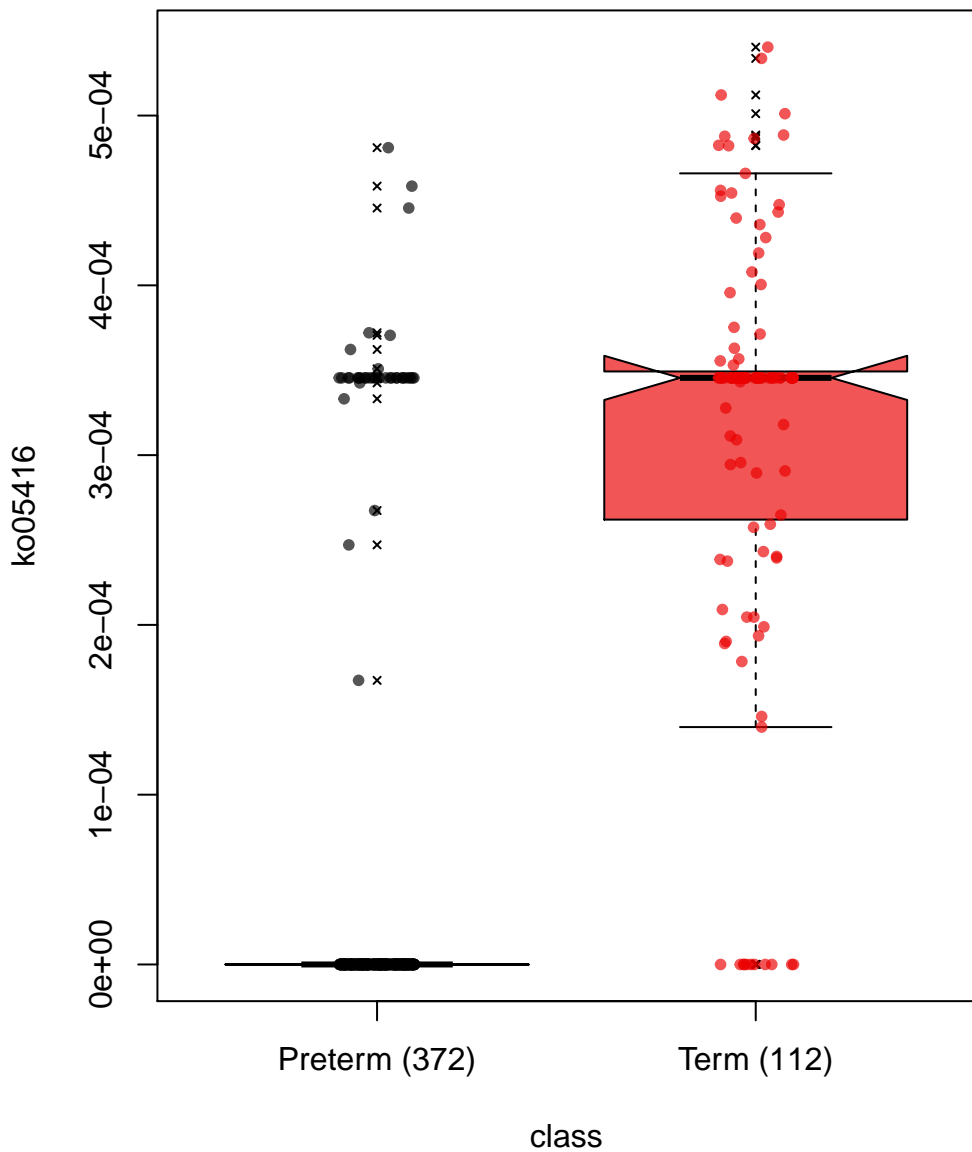

Partial Residual Plot

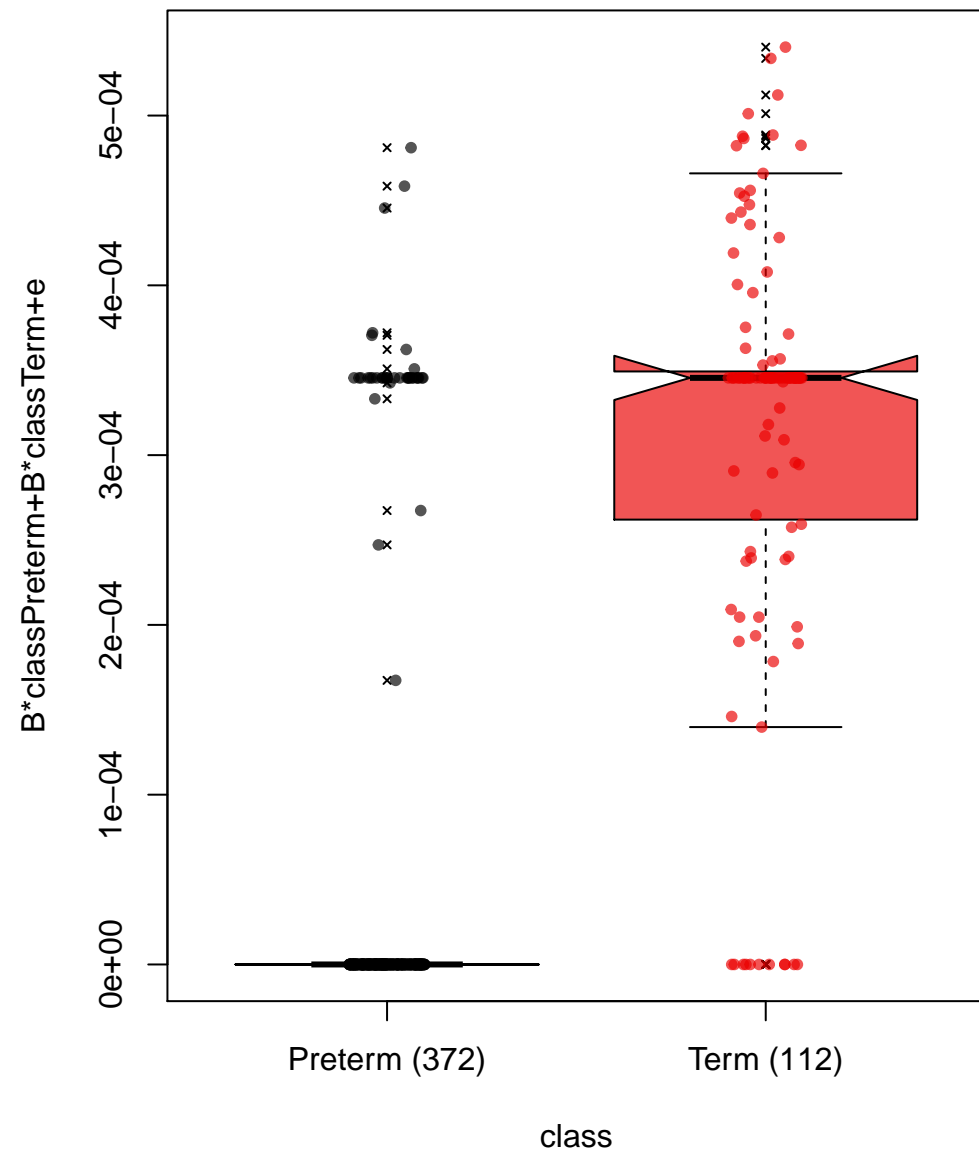

classTerm (0.000277 sd 1.2e-05, p=7.95e-80, q=2.02e-78)

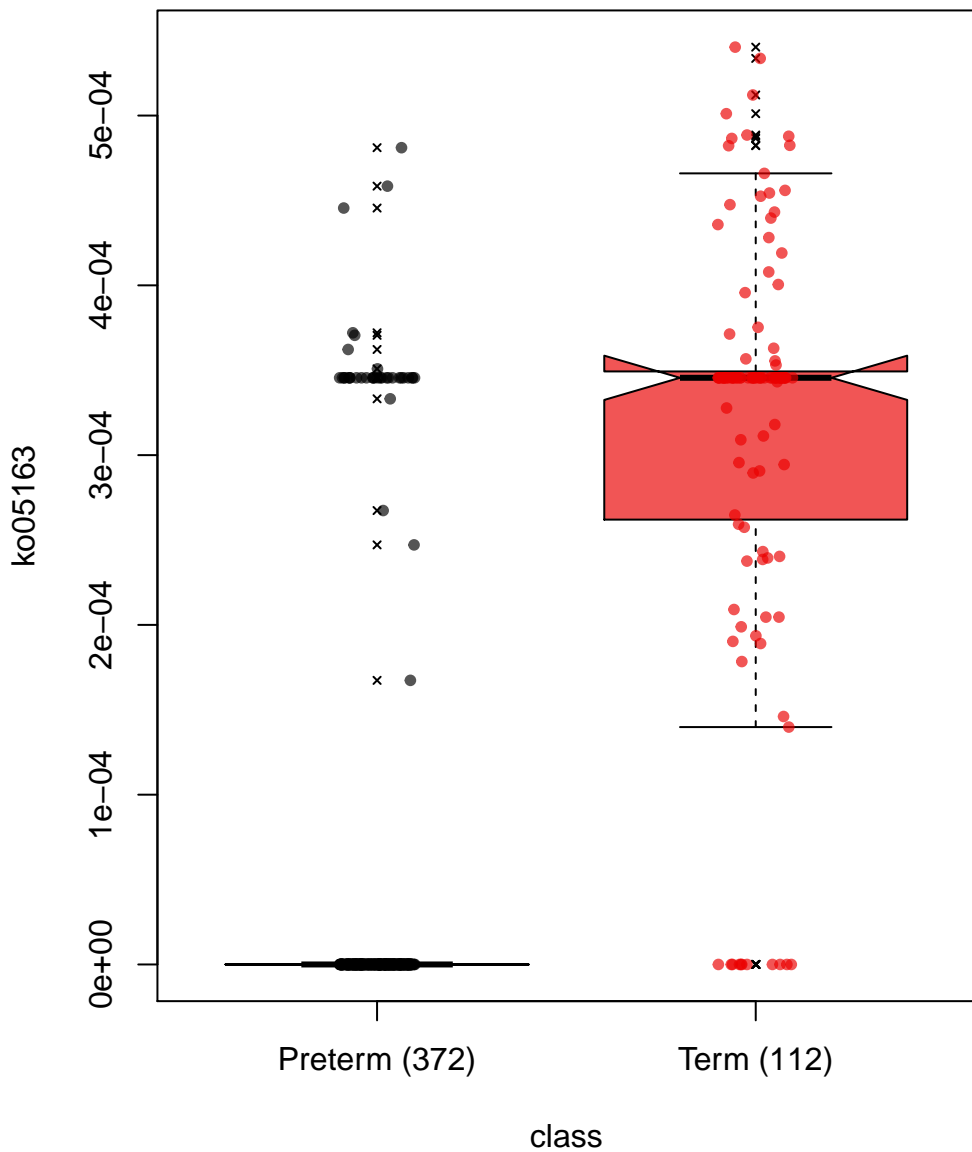

Partial Residual Plot

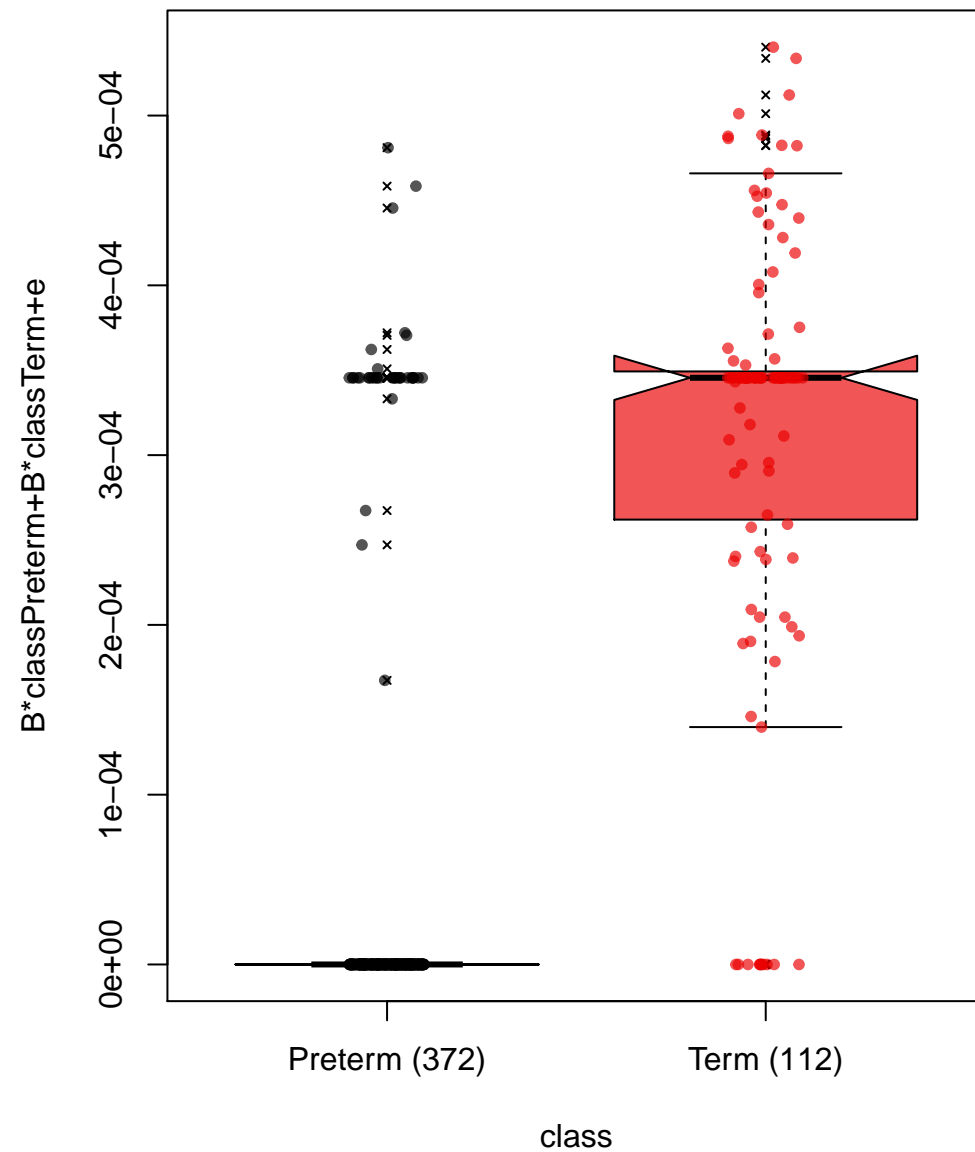

classTerm (0.000277 sd 1.2e-05, p=7.95e-80, q=2.02e-78)

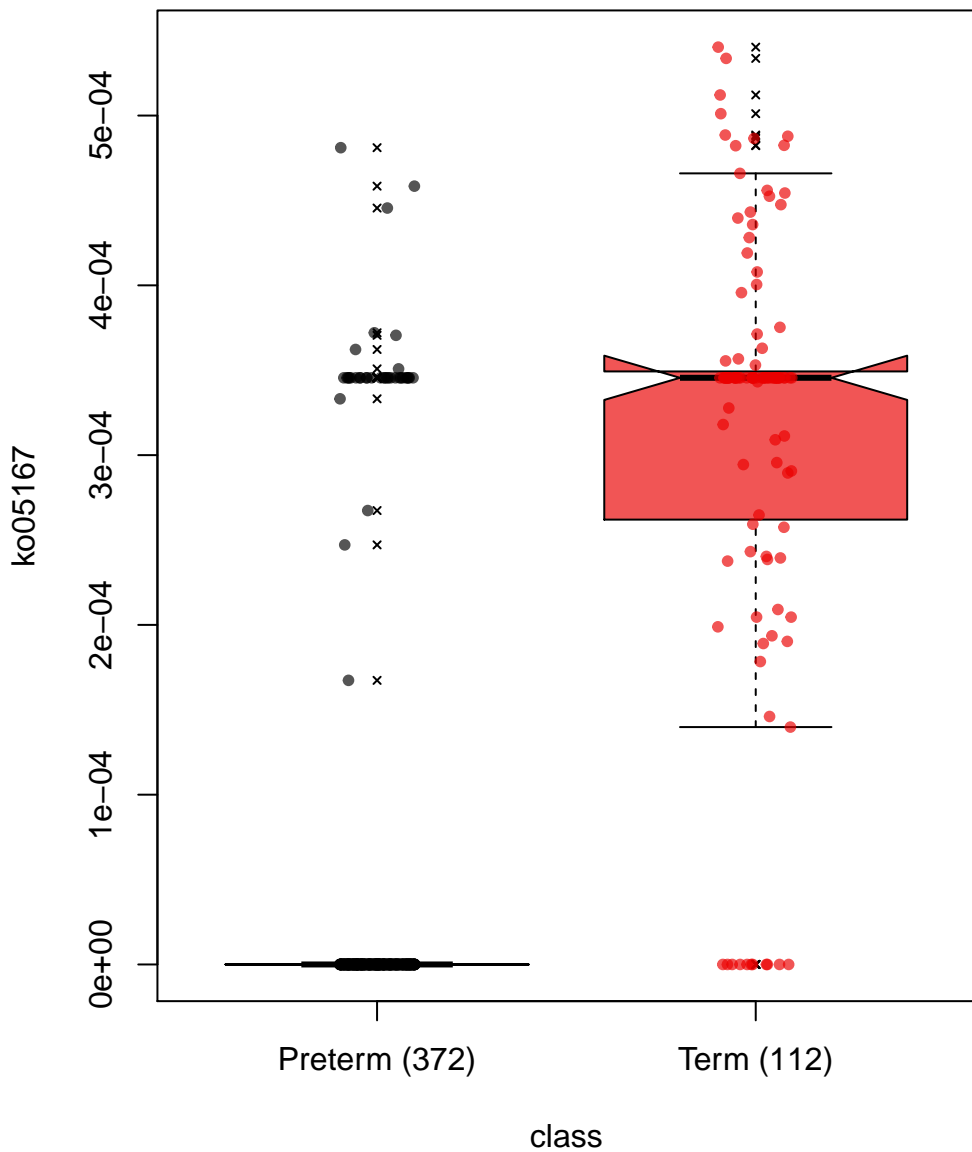

Partial Residual Plot

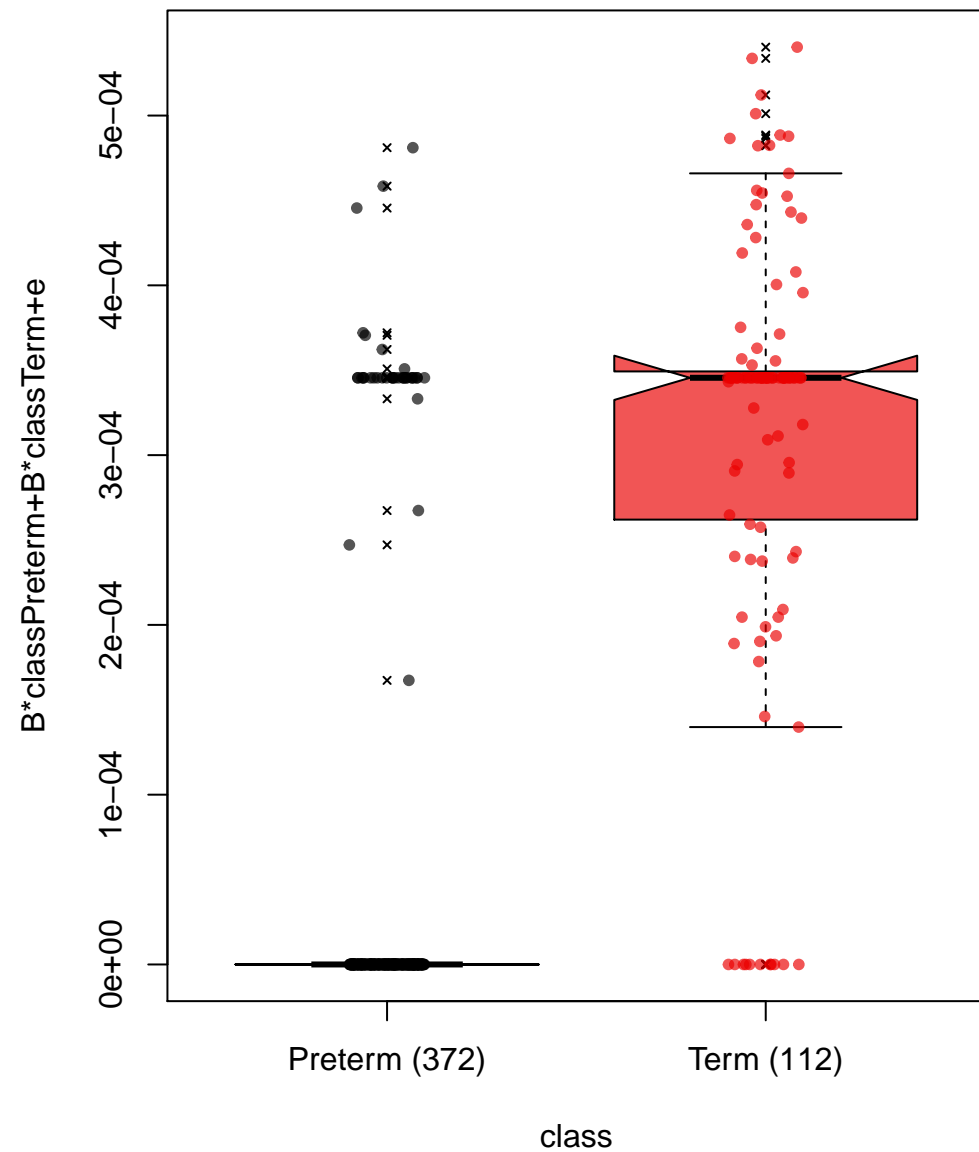

classTerm (0.000277 sd 1.2e-05, p=7.95e-80, q=2.02e-78)

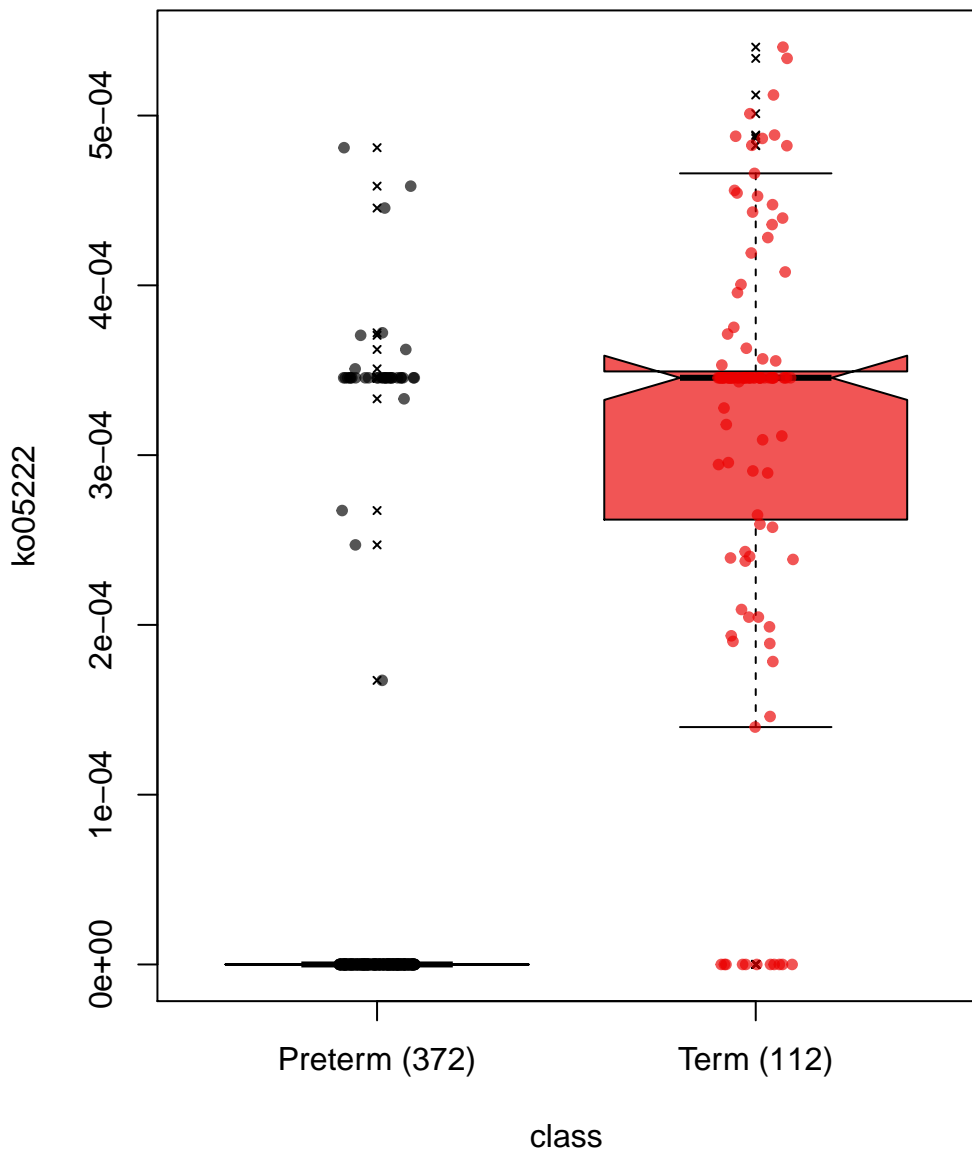

Partial Residual Plot

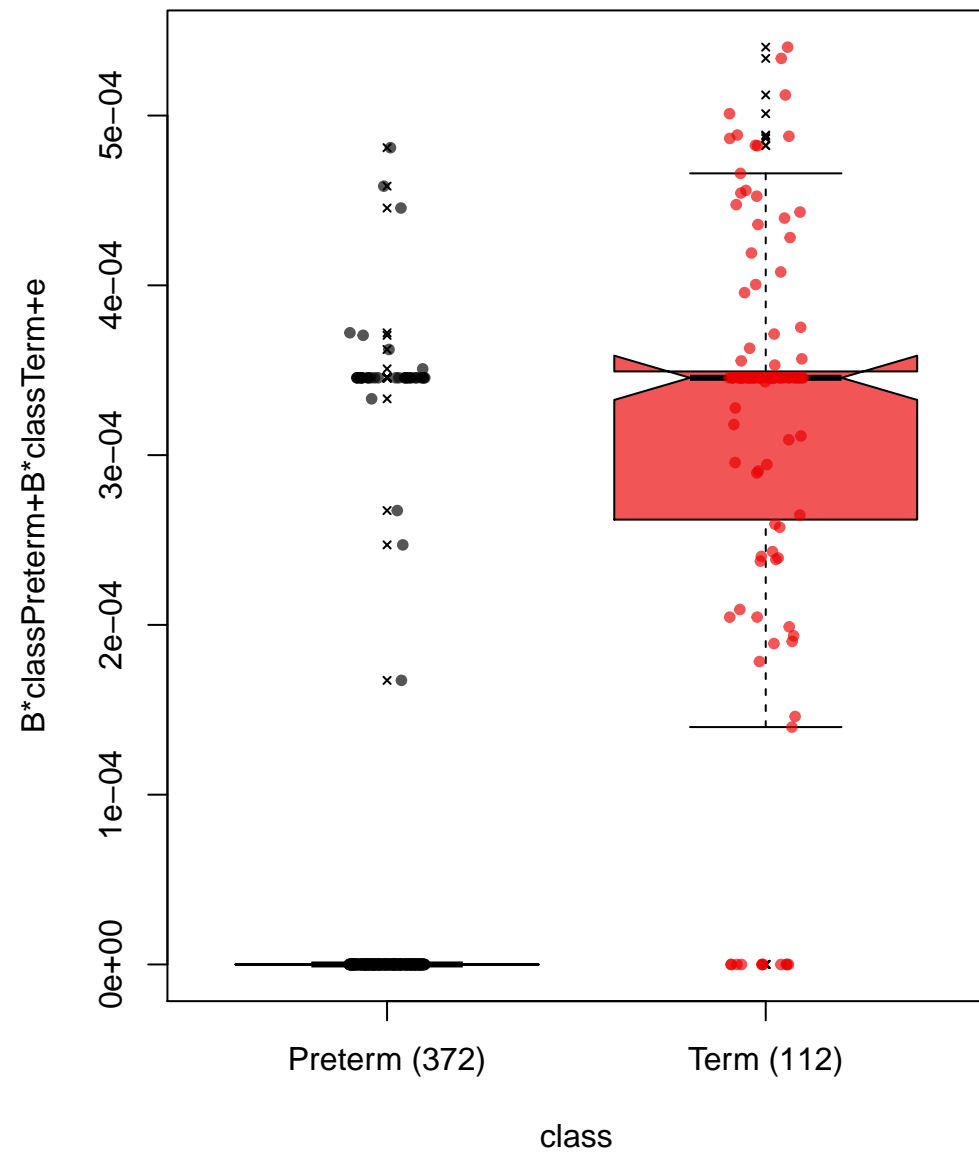



classTerm (0.000477 sd 2.53e-05, p=1.29e-59, q=2.76e-58)

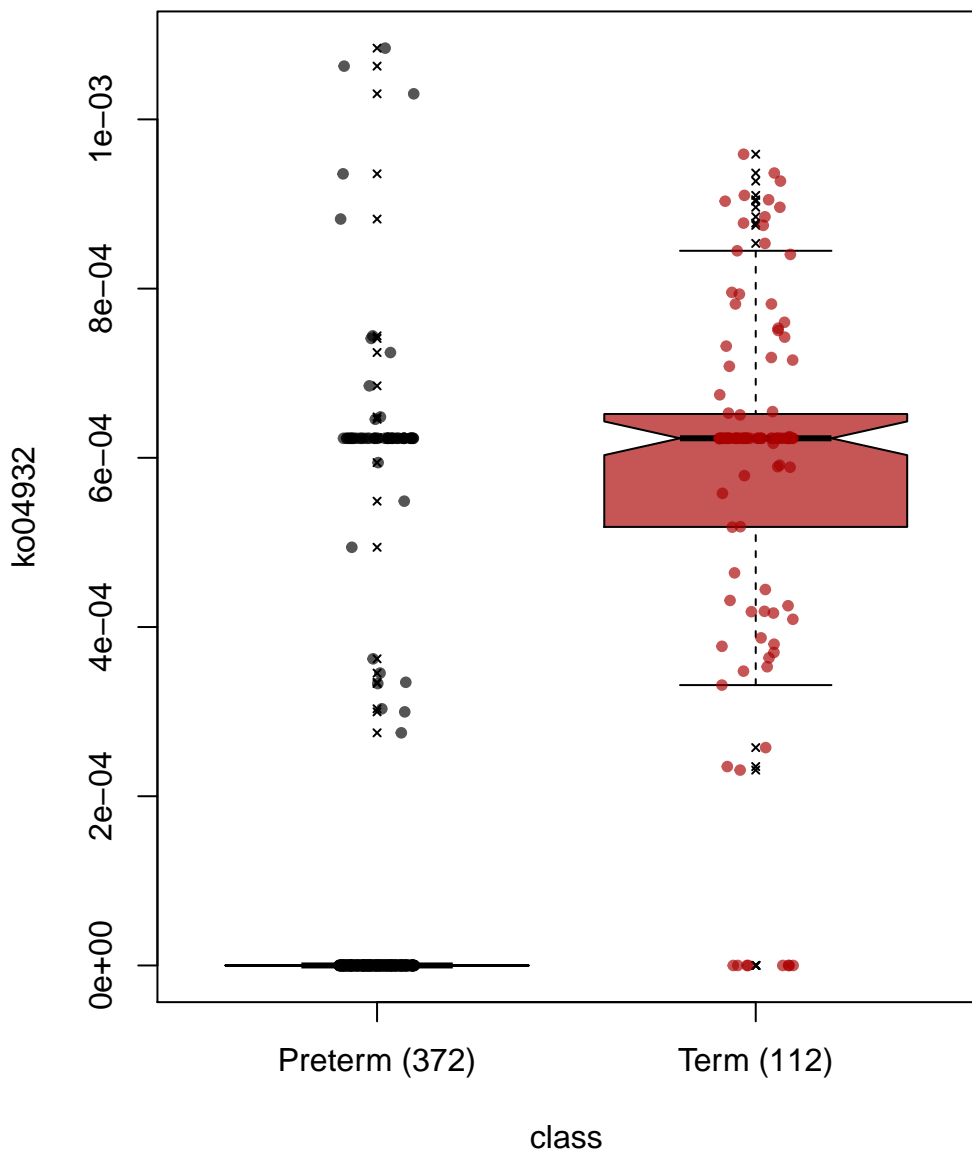

Partial Residual Plot

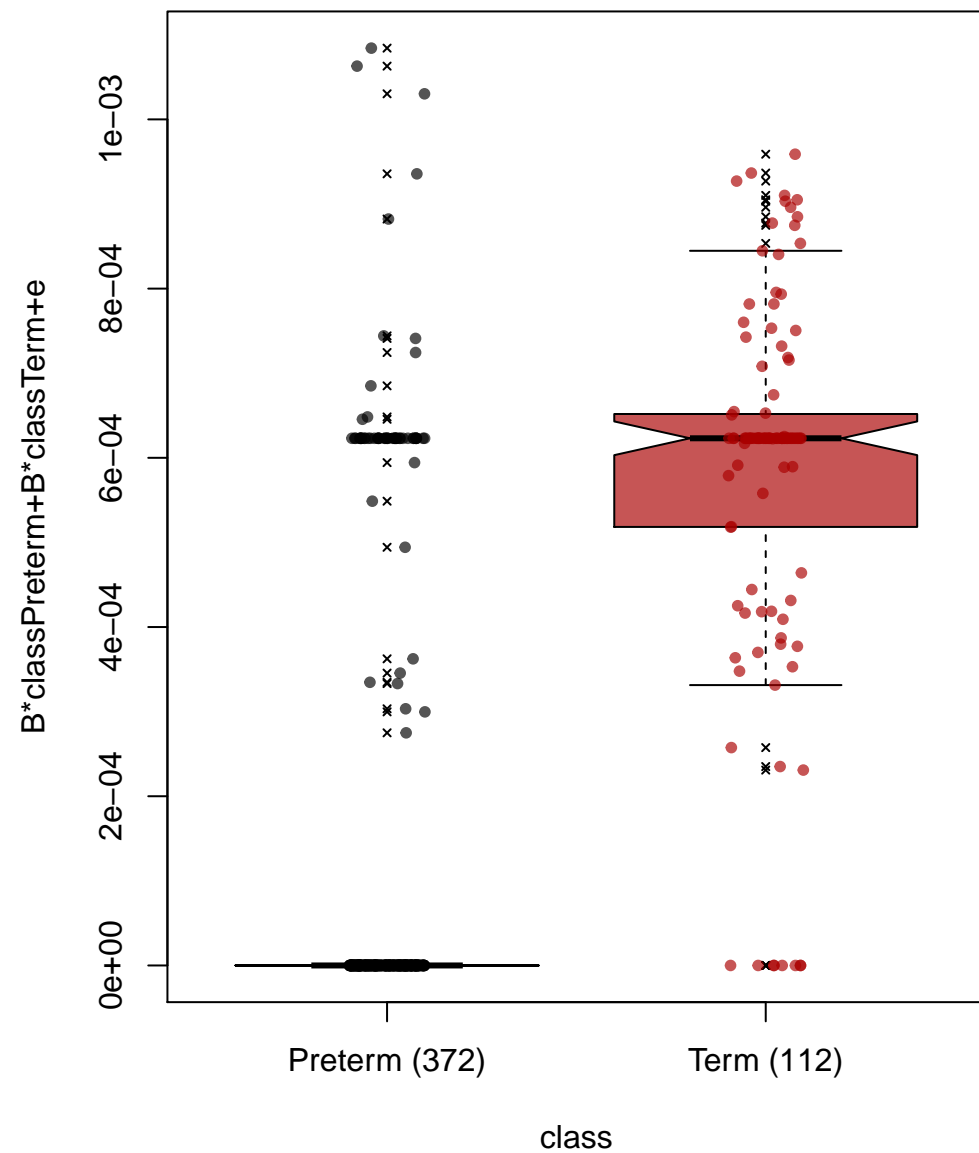

classTerm (0.000477 sd 2.53e-05, p=1.29e-59, q=2.76e-58)

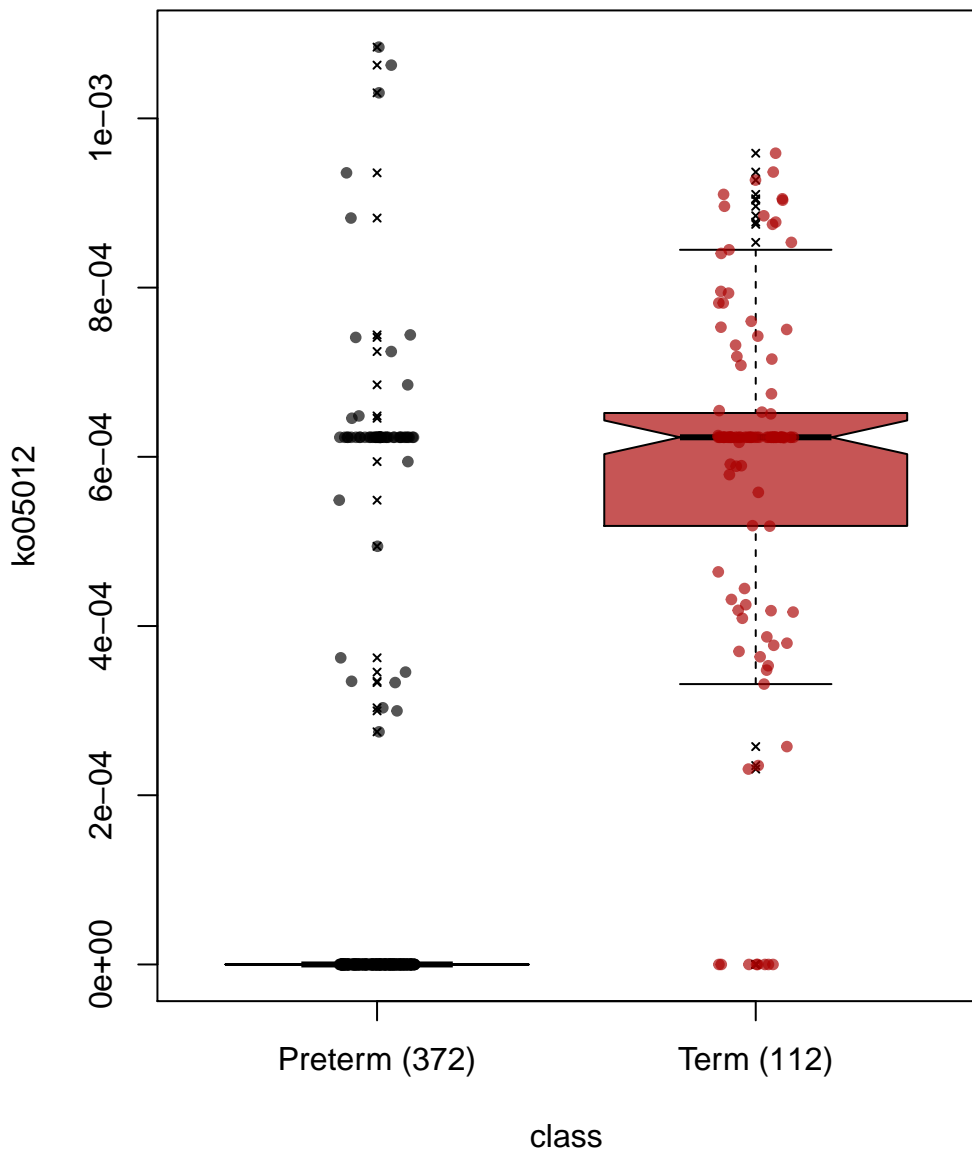

Partial Residual Plot

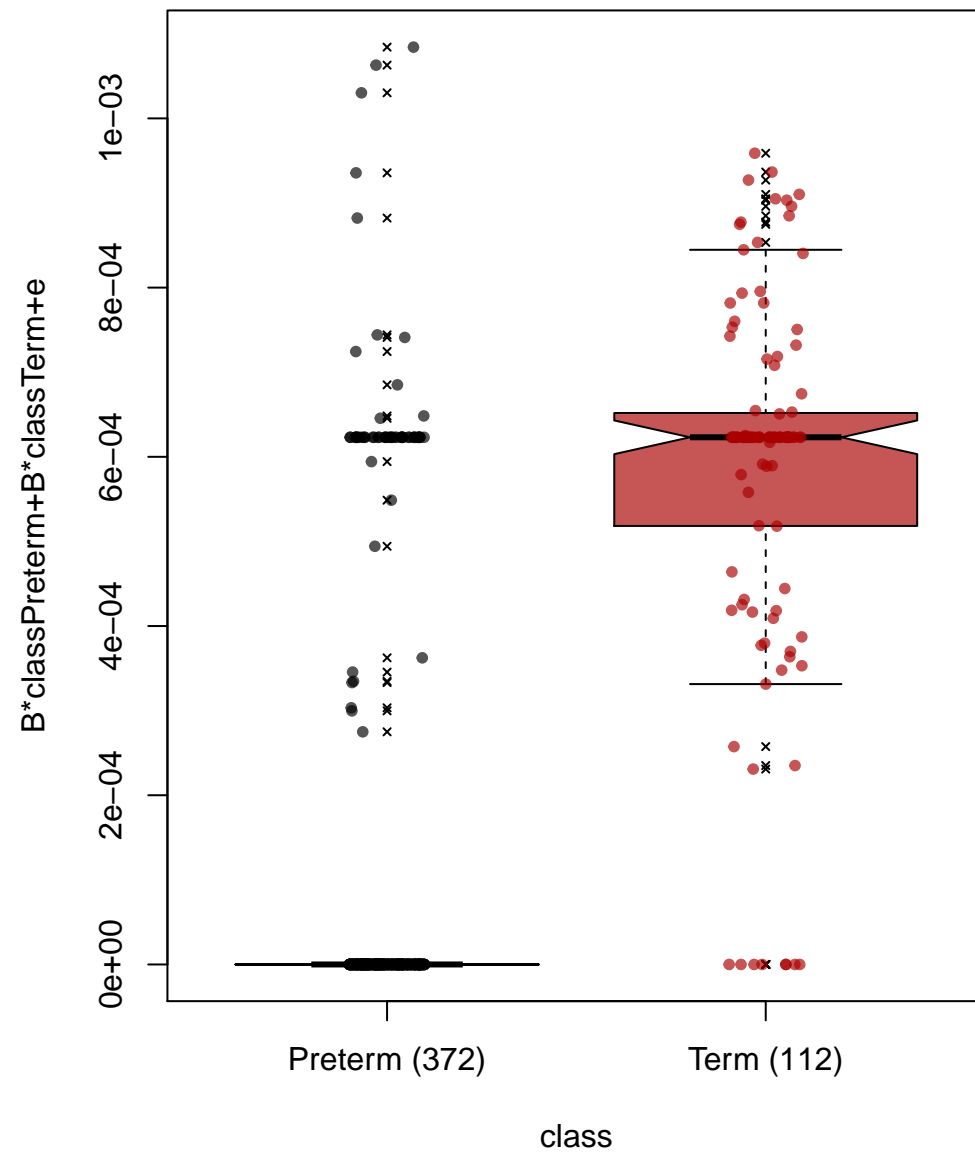

classTerm (0.000371 sd 2e-05, p=3.81e-58, q=7.59e-57)

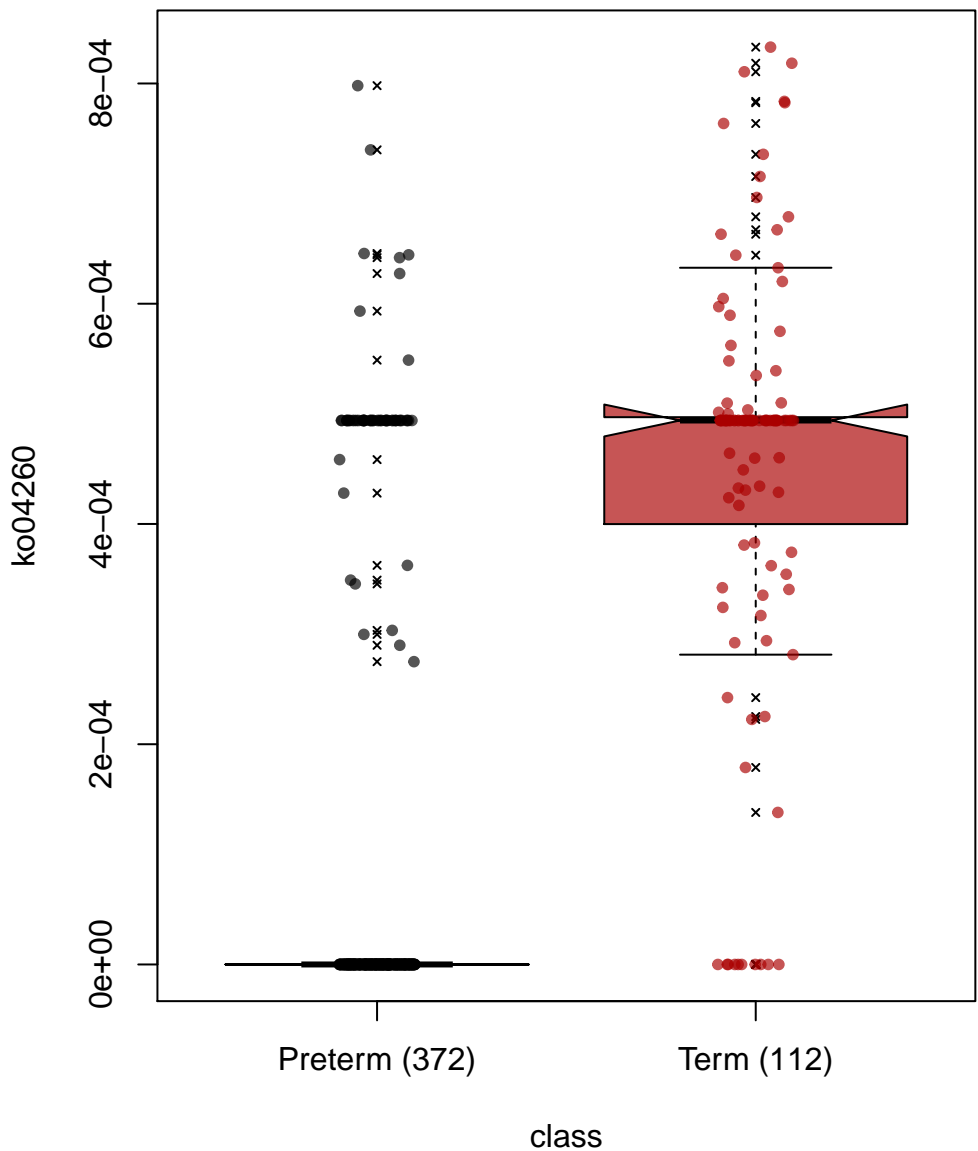

Partial Residual Plot

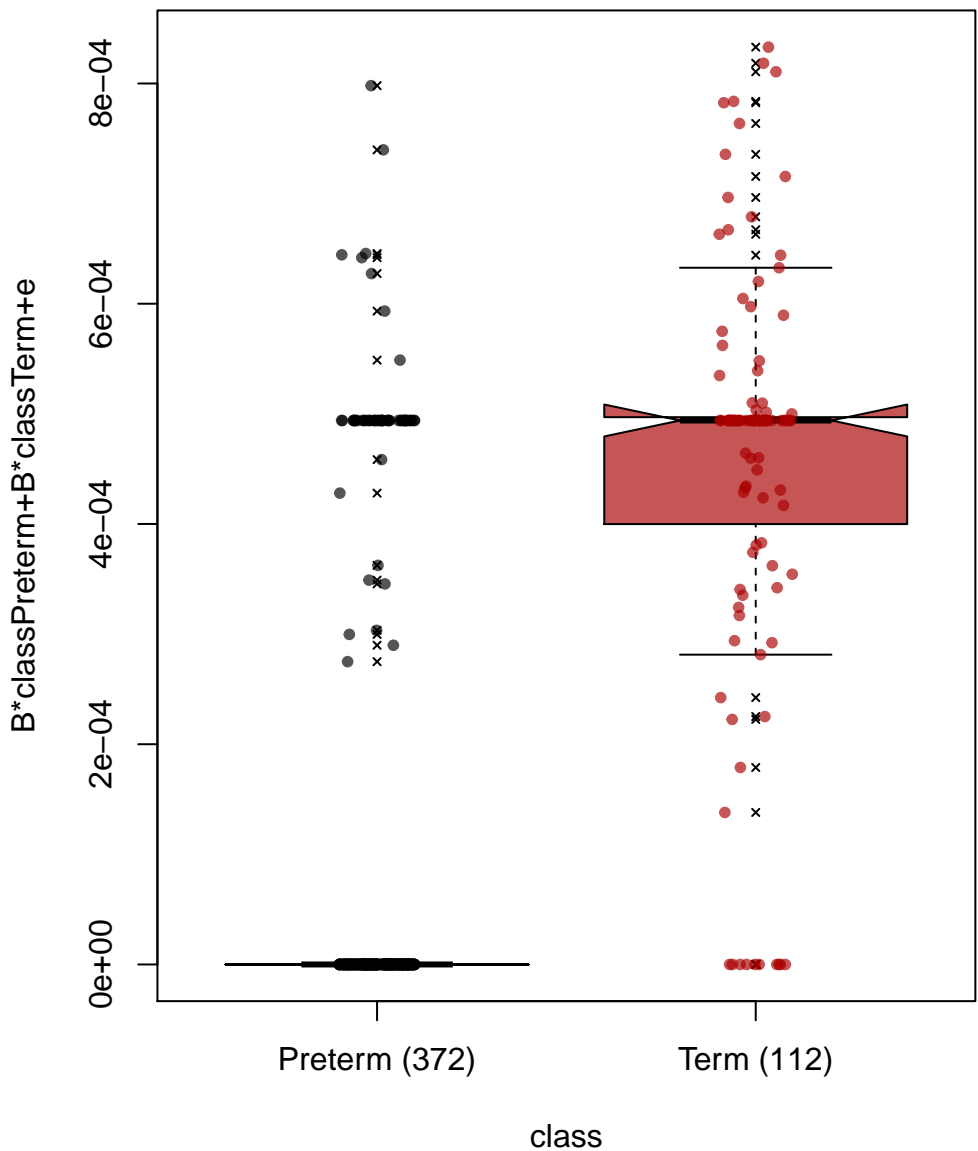

classTerm (0.000291 sd 1.58e-05, p=8.78e-58, q=1.63e-56)

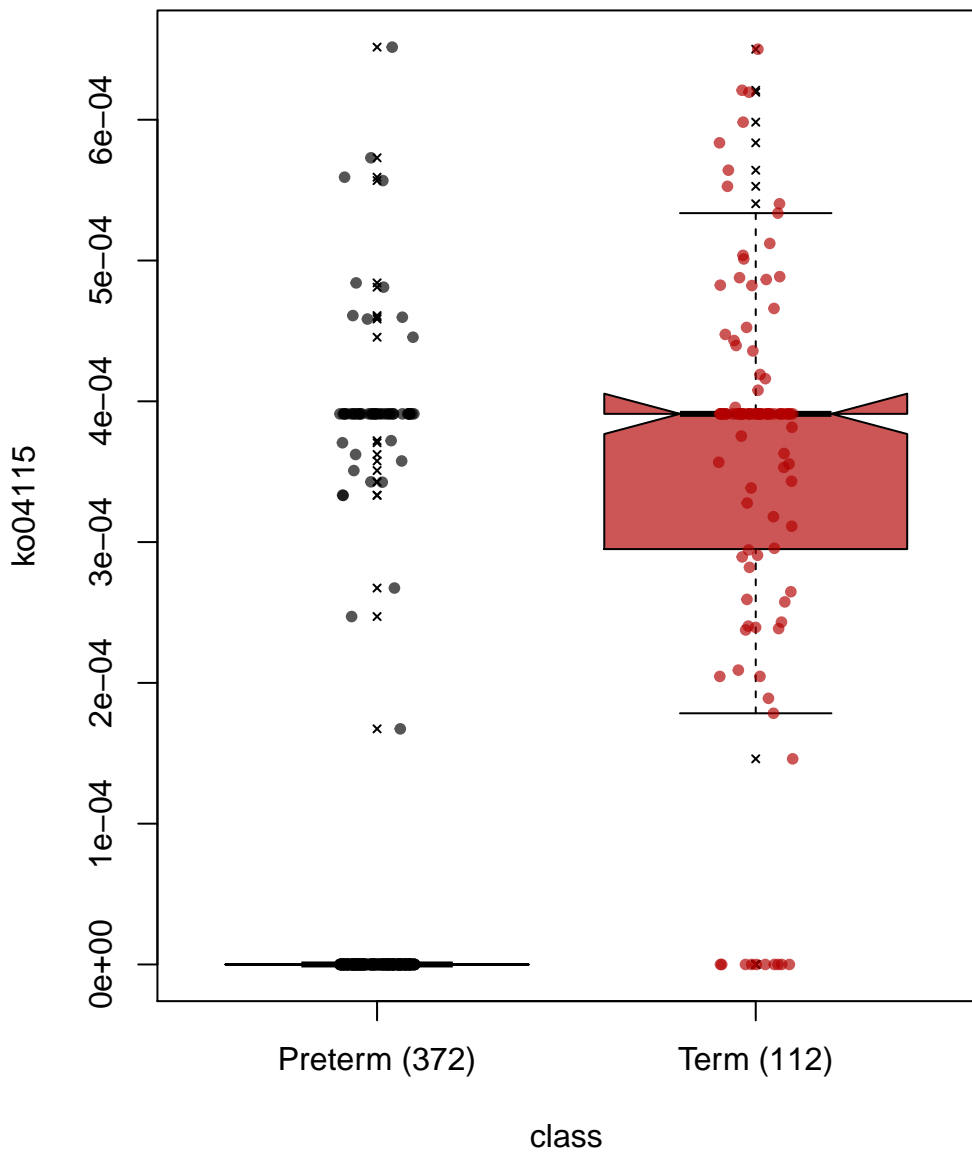

Partial Residual Plot

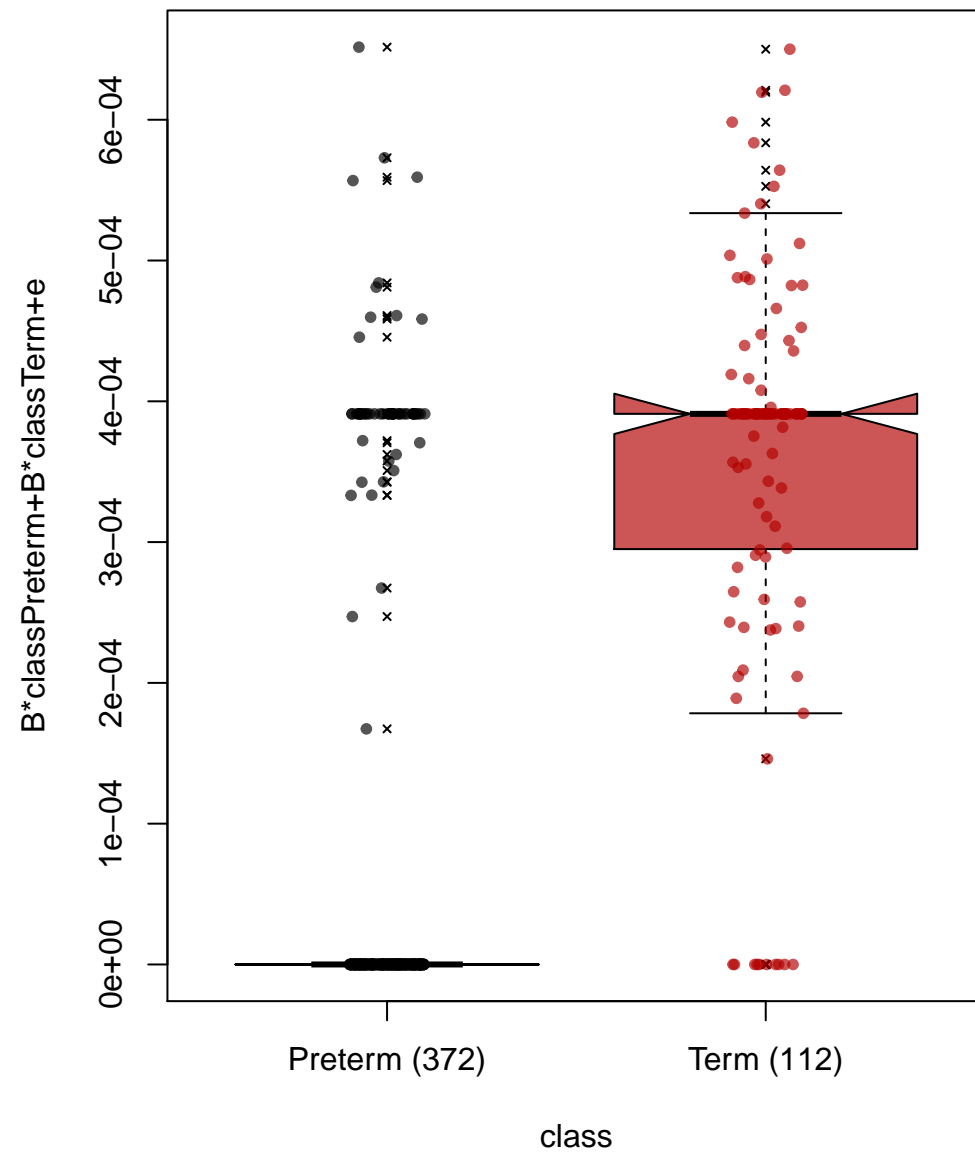

classTerm (0.0061 sd 0.000423, p=2.36e-39, q=4.12e-38)

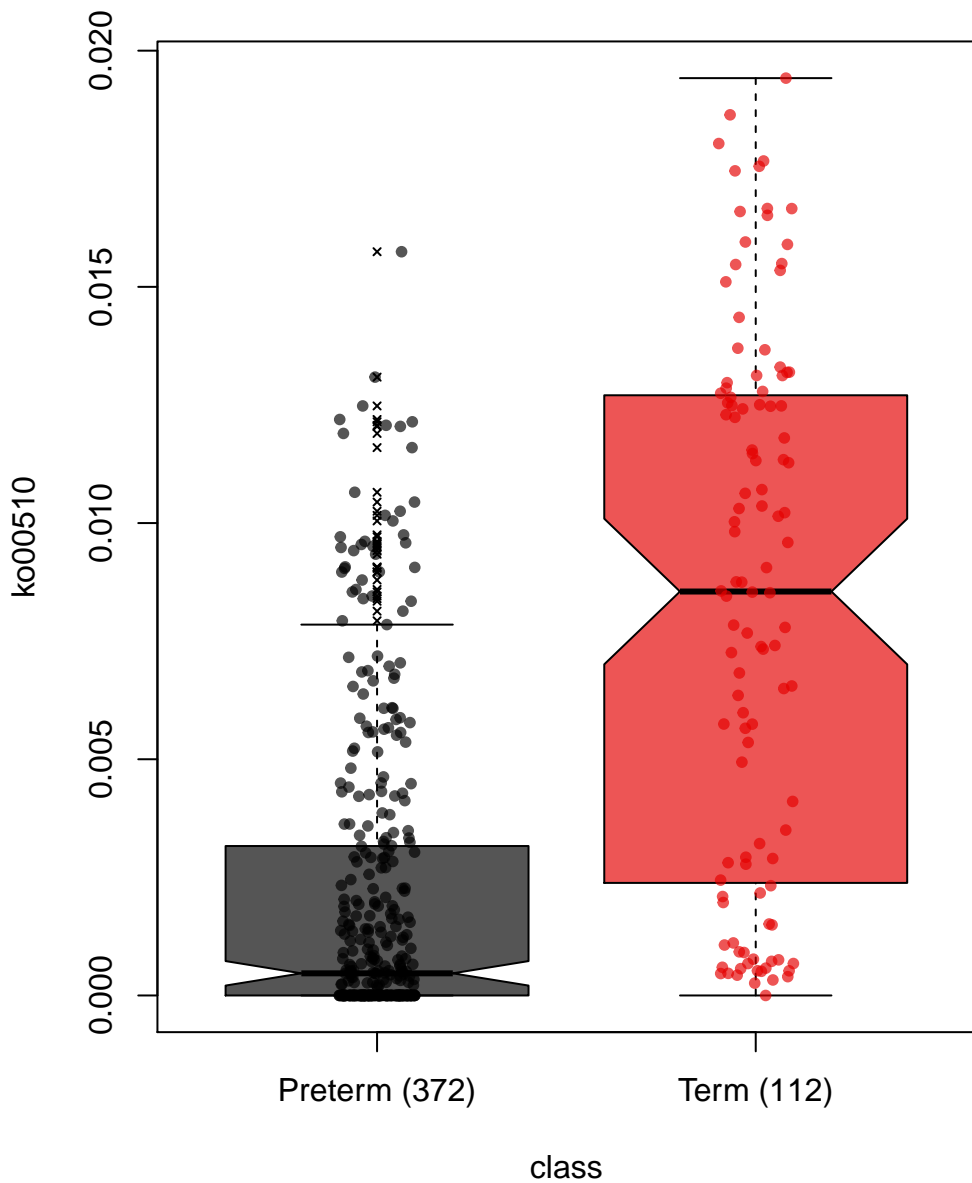

Partial Residual Plot

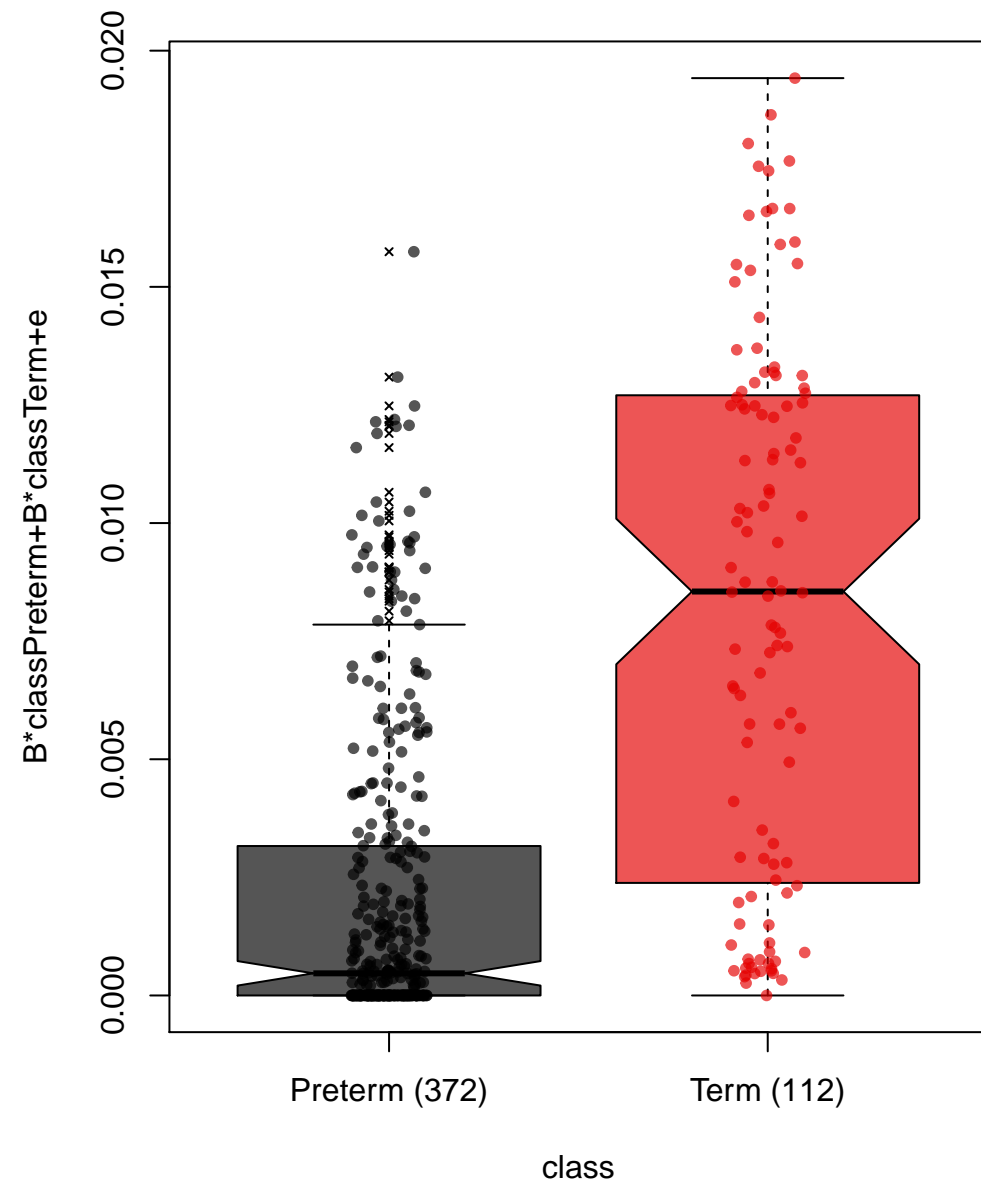

classTerm (0.000503 sd 3.55e-05, p=2.21e-38, q=3.63e-37)

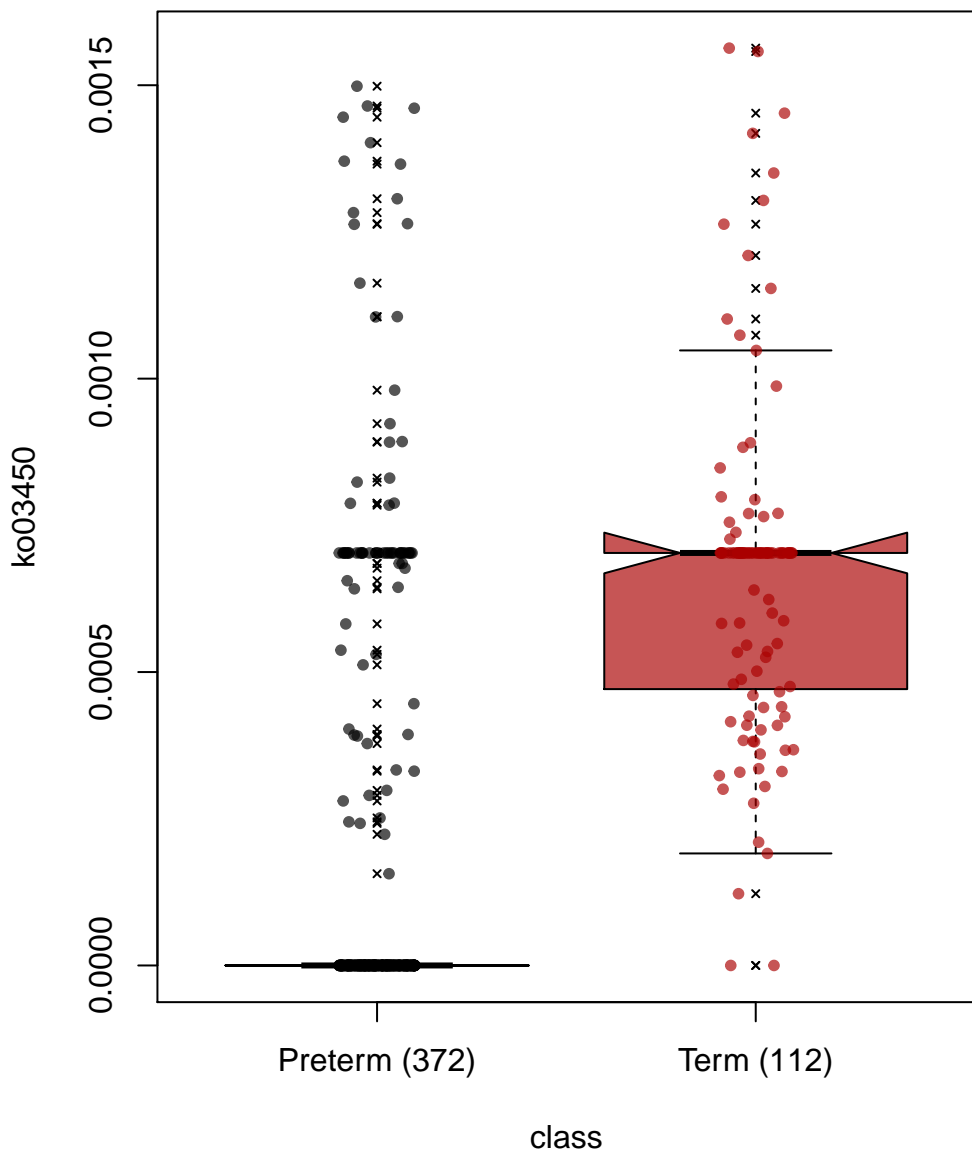

Partial Residual Plot

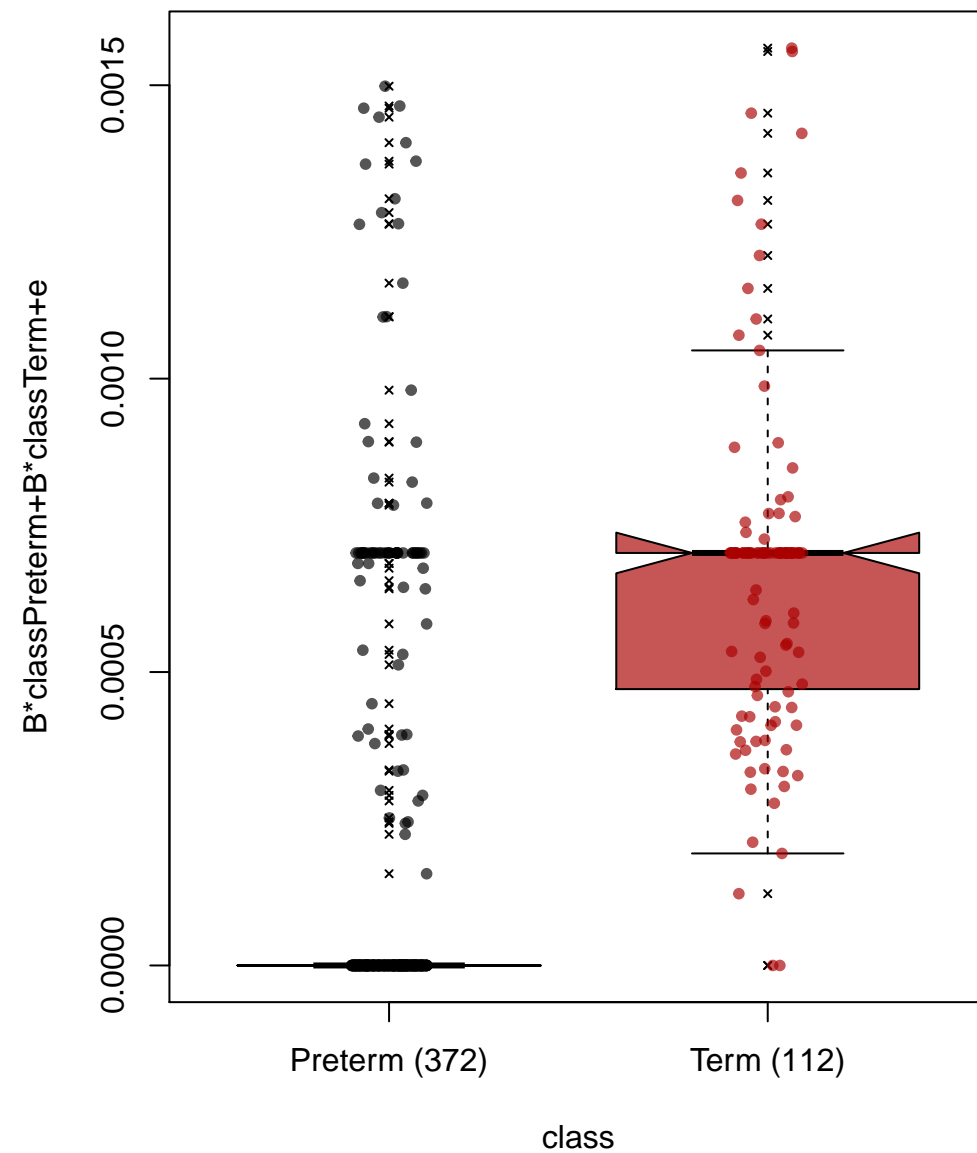

classTerm (0.00603 sd 0.000442, p=4.5e-36, q=6.98e-35)

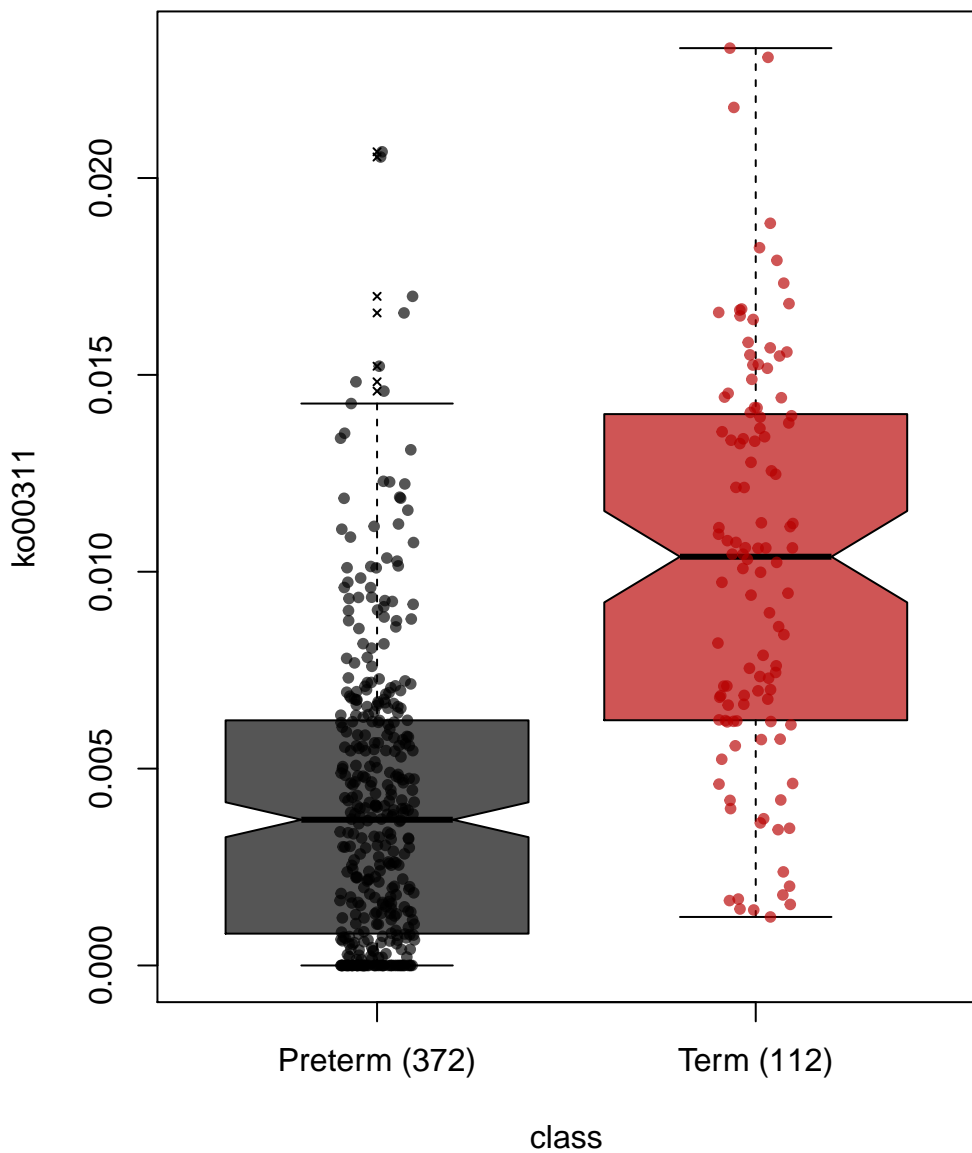

Partial Residual Plot

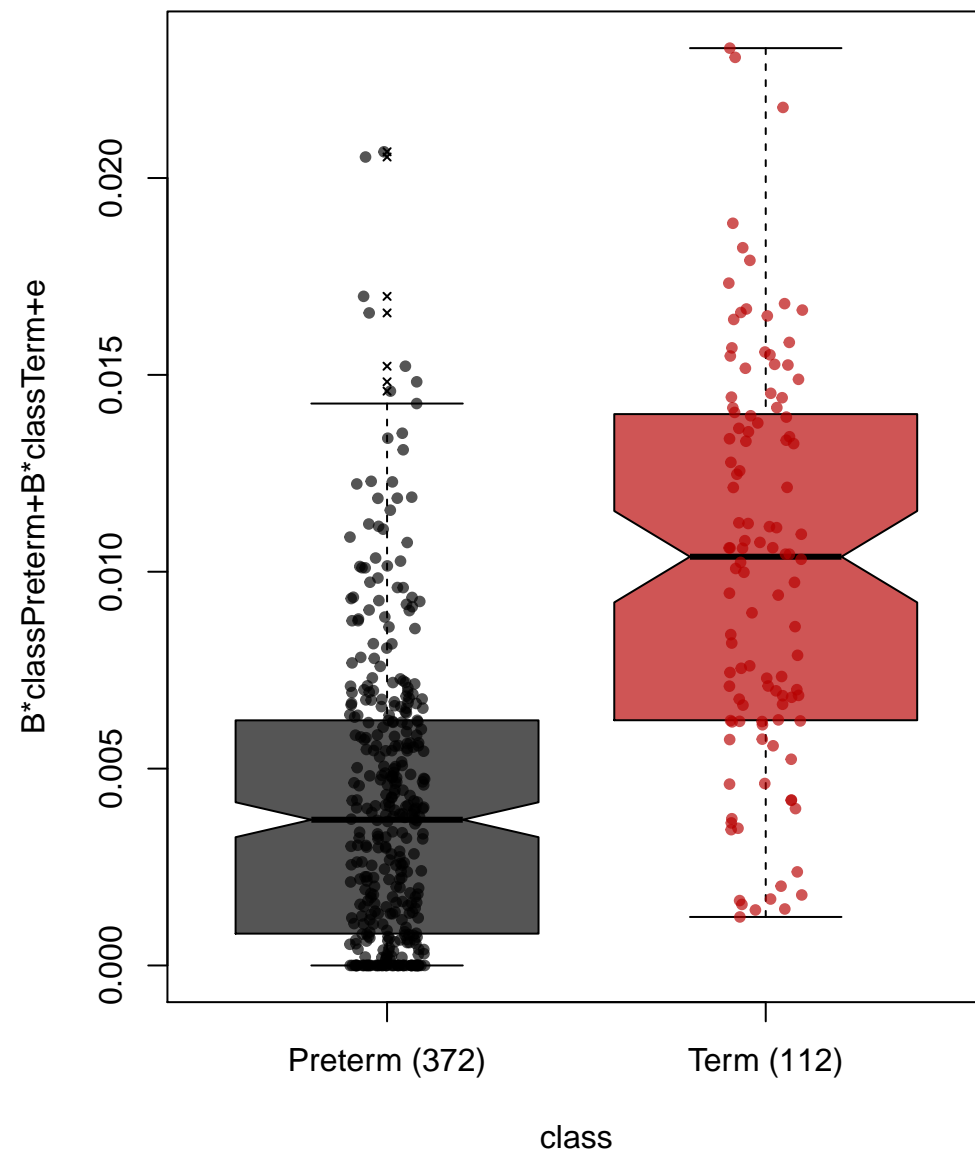

classTerm (0.0156 sd 0.00116, p=3.32e-35, q=4.87e-34)

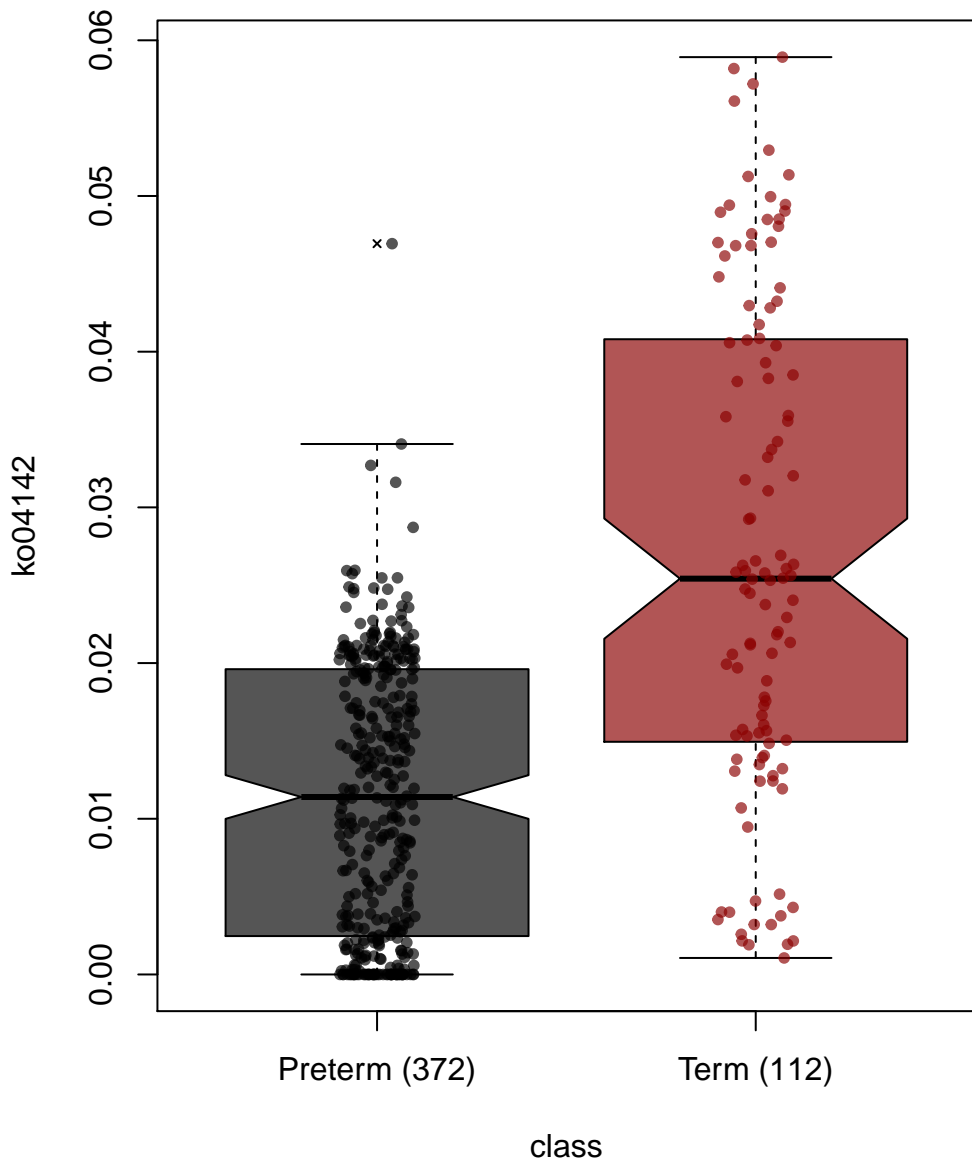

Partial Residual Plot

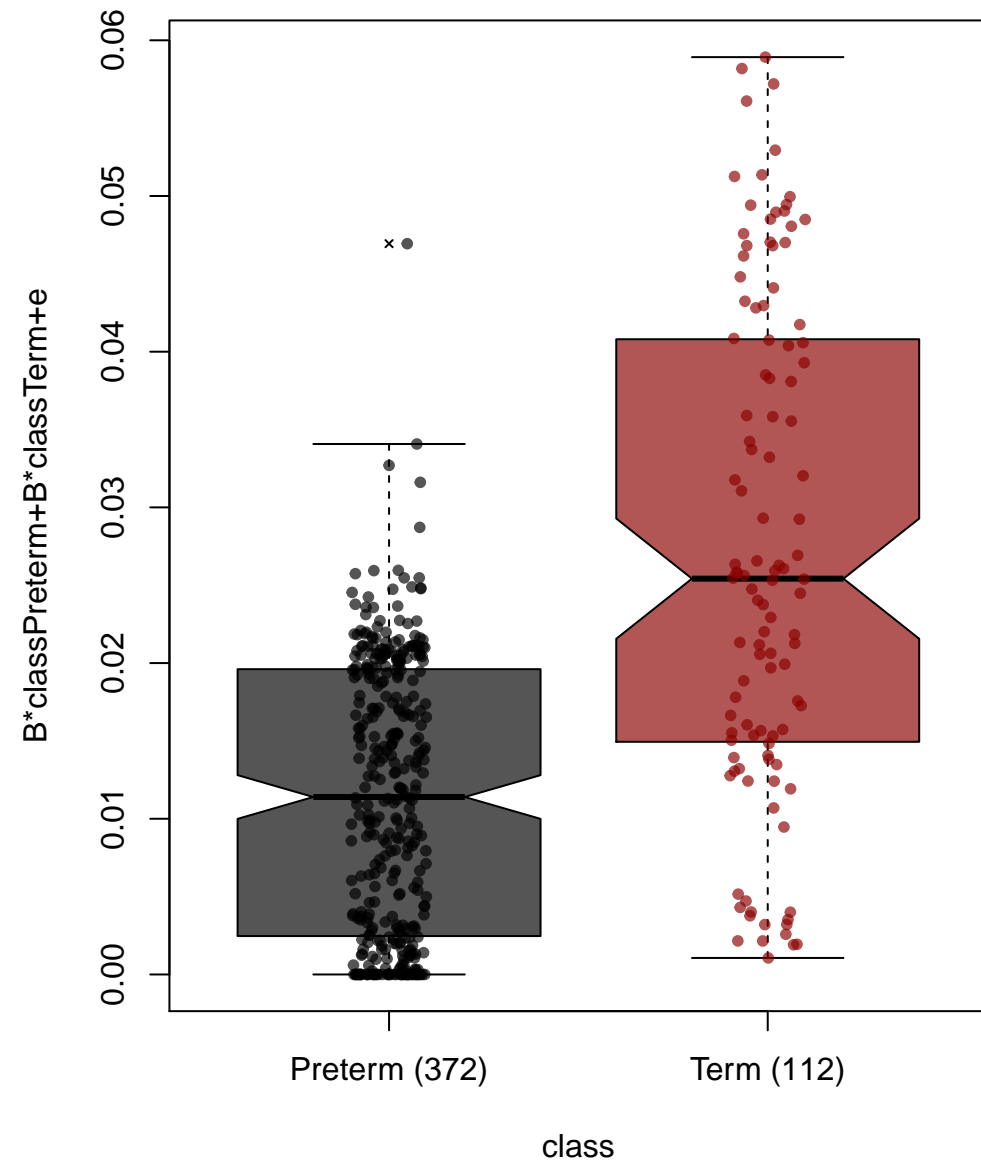



classTerm (0.0003 sd 2.27e-05, p=2.96e-34, q=4.13e-33)

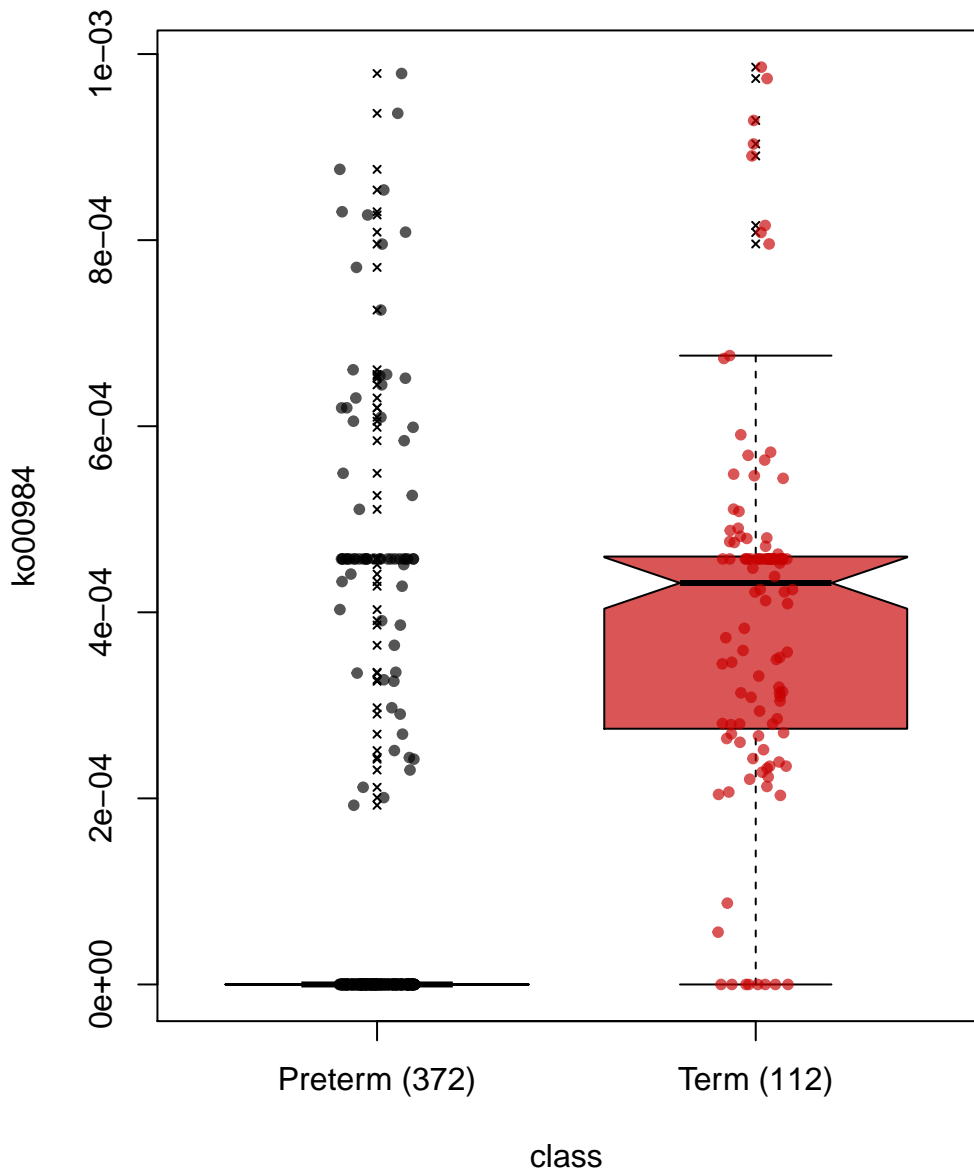

Partial Residual Plot

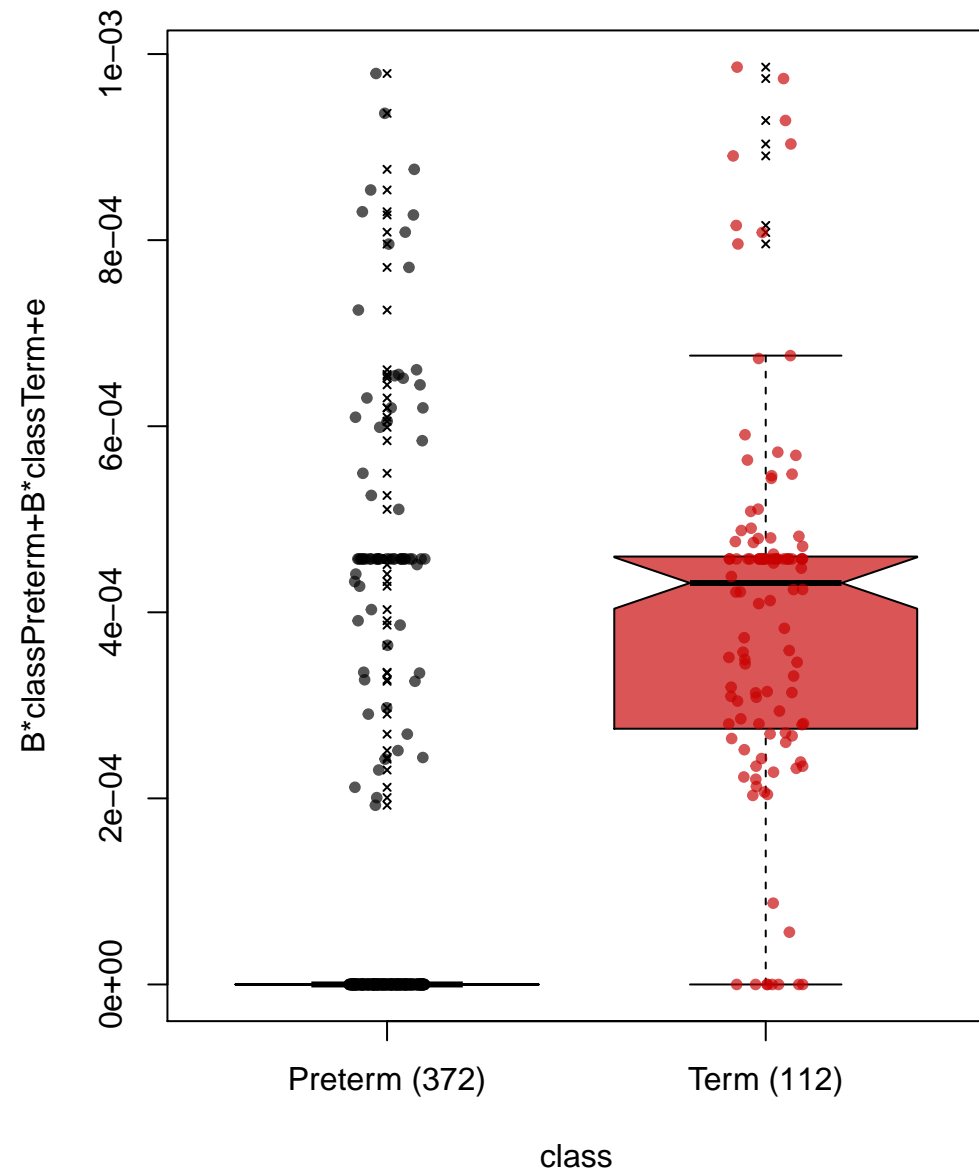

classTerm (0.0114 sd 0.000871, p=5.92e-34, q=7.87e-33)

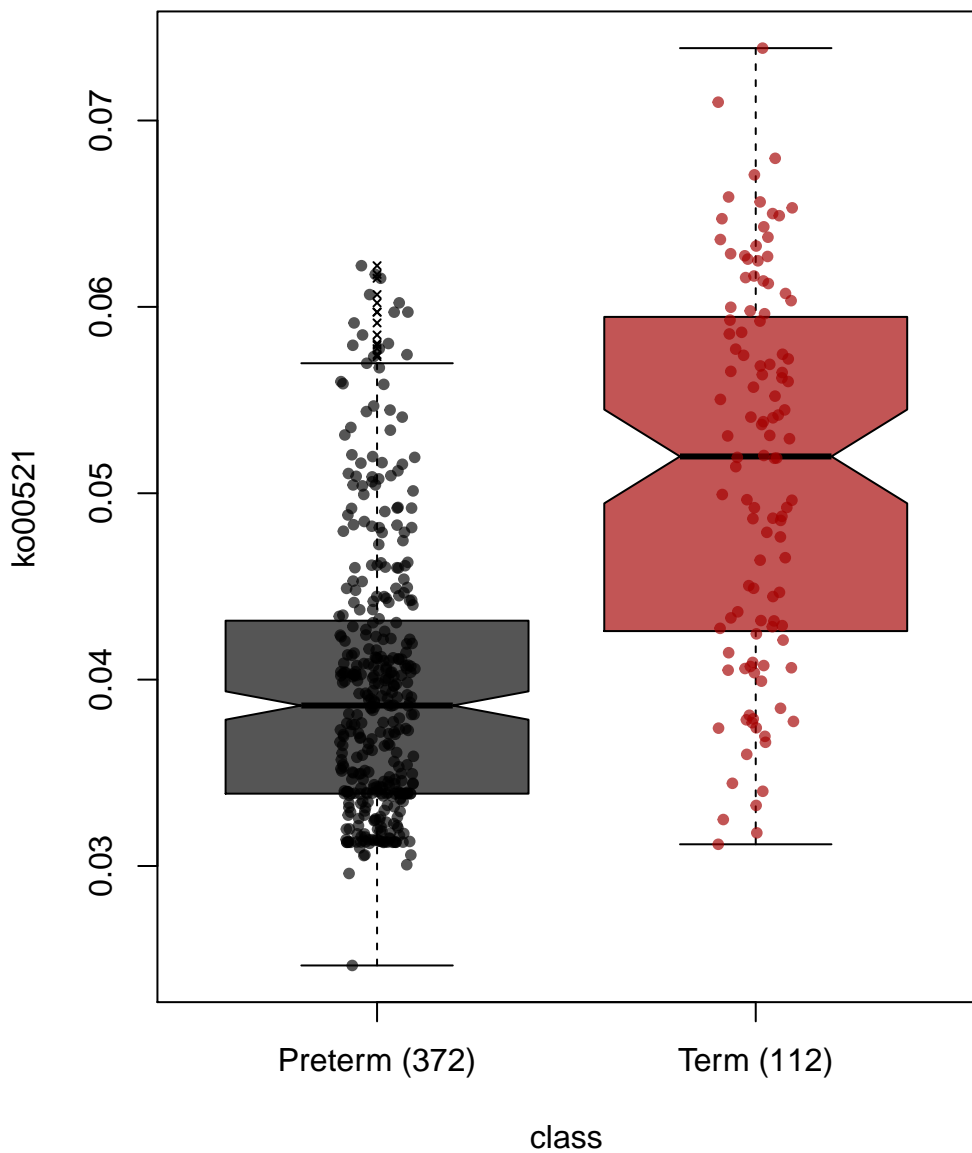

Partial Residual Plot

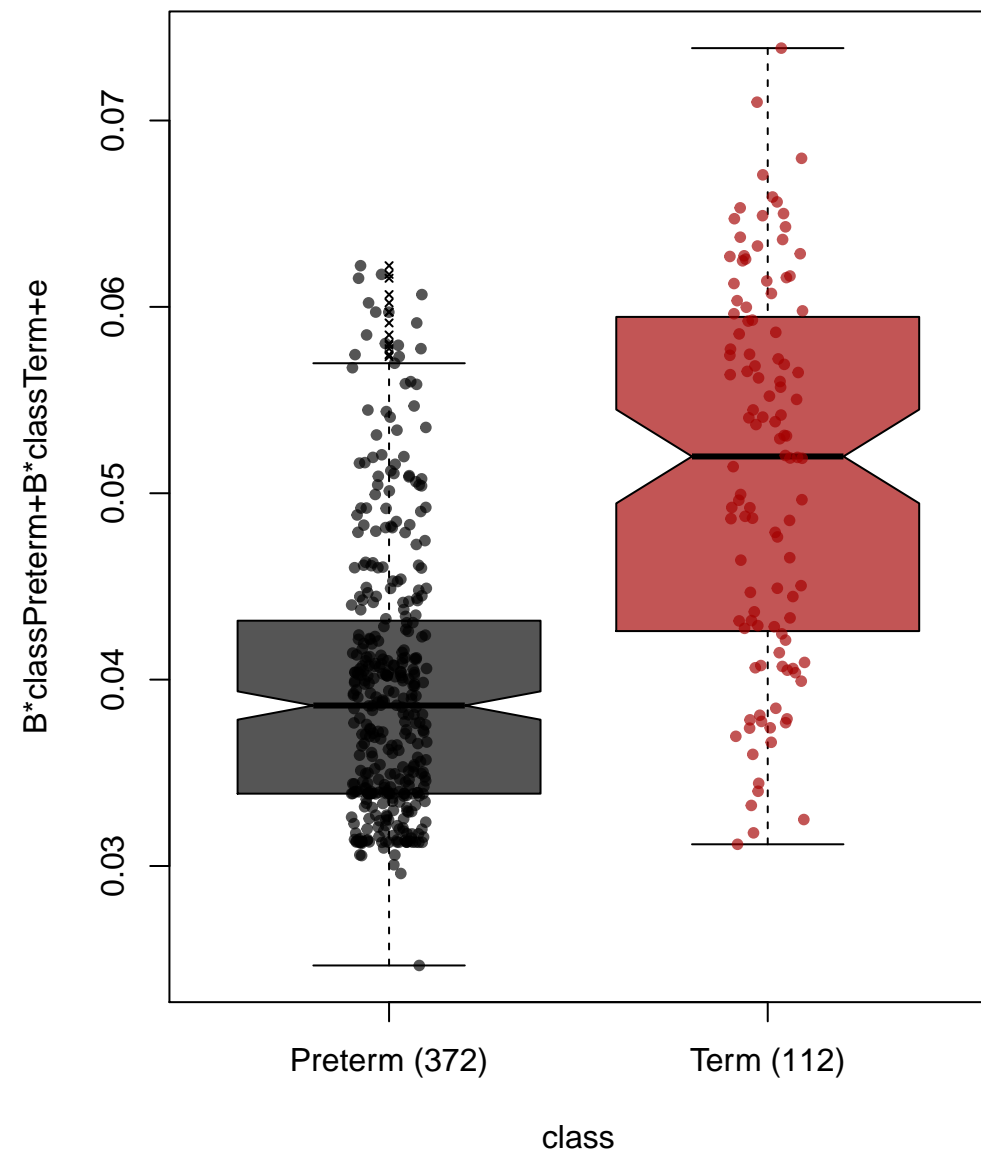

classTerm ( $-0.00623$  sd  $0.000492$ ,  $p=6.21e-32$ ,  $q=7.87e-31$ )

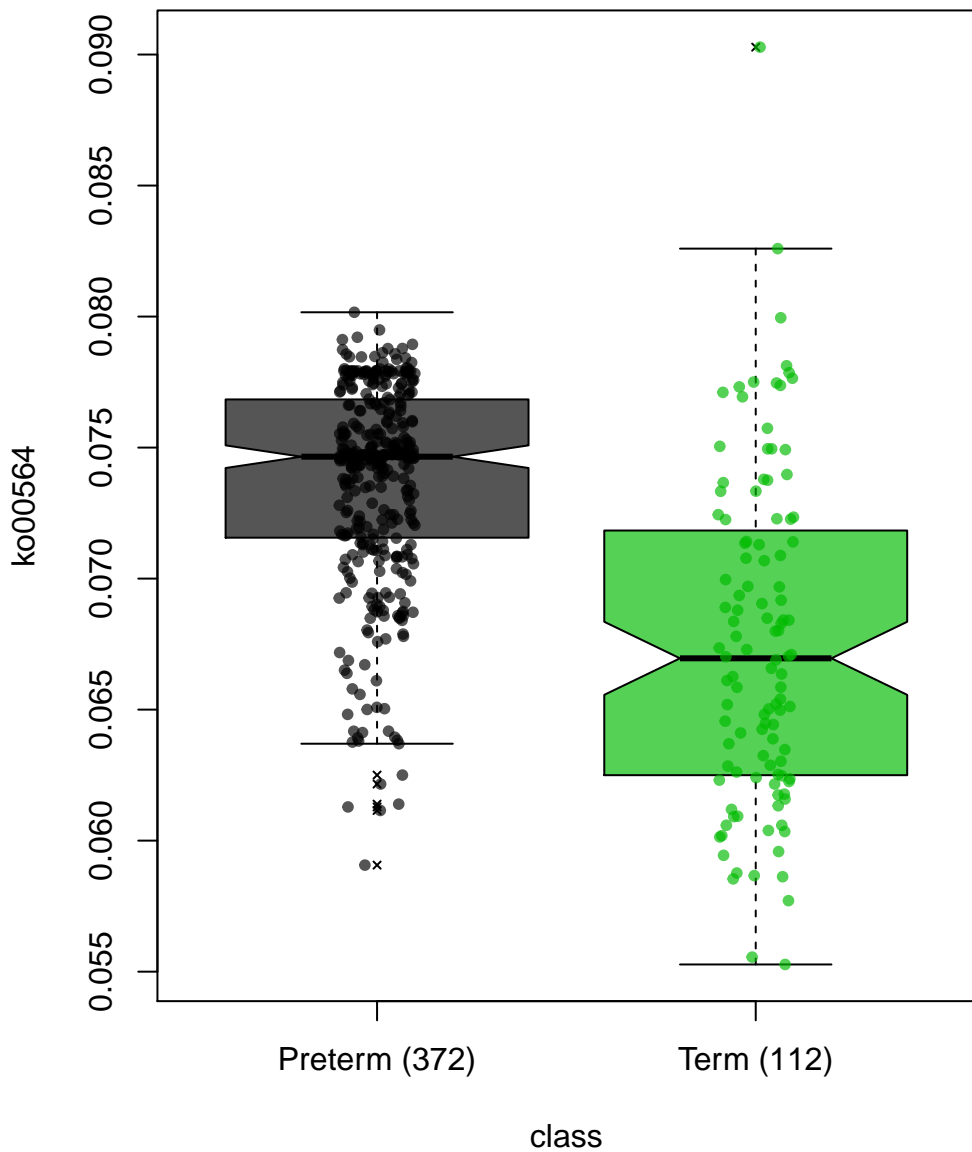

Partial Residual Plot

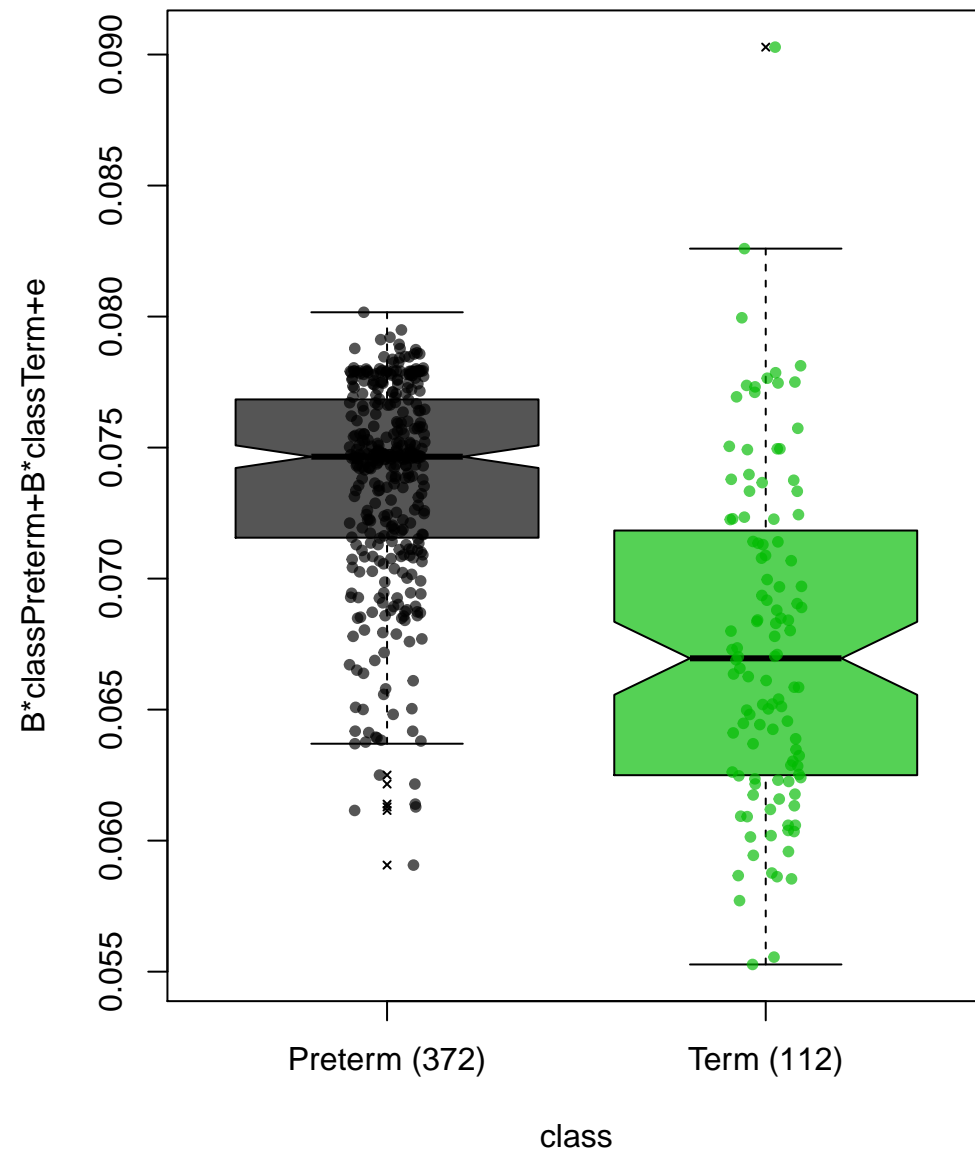

classTerm (0.0104 sd 0.000839, p=4.87e-31, q=5.9e-30)

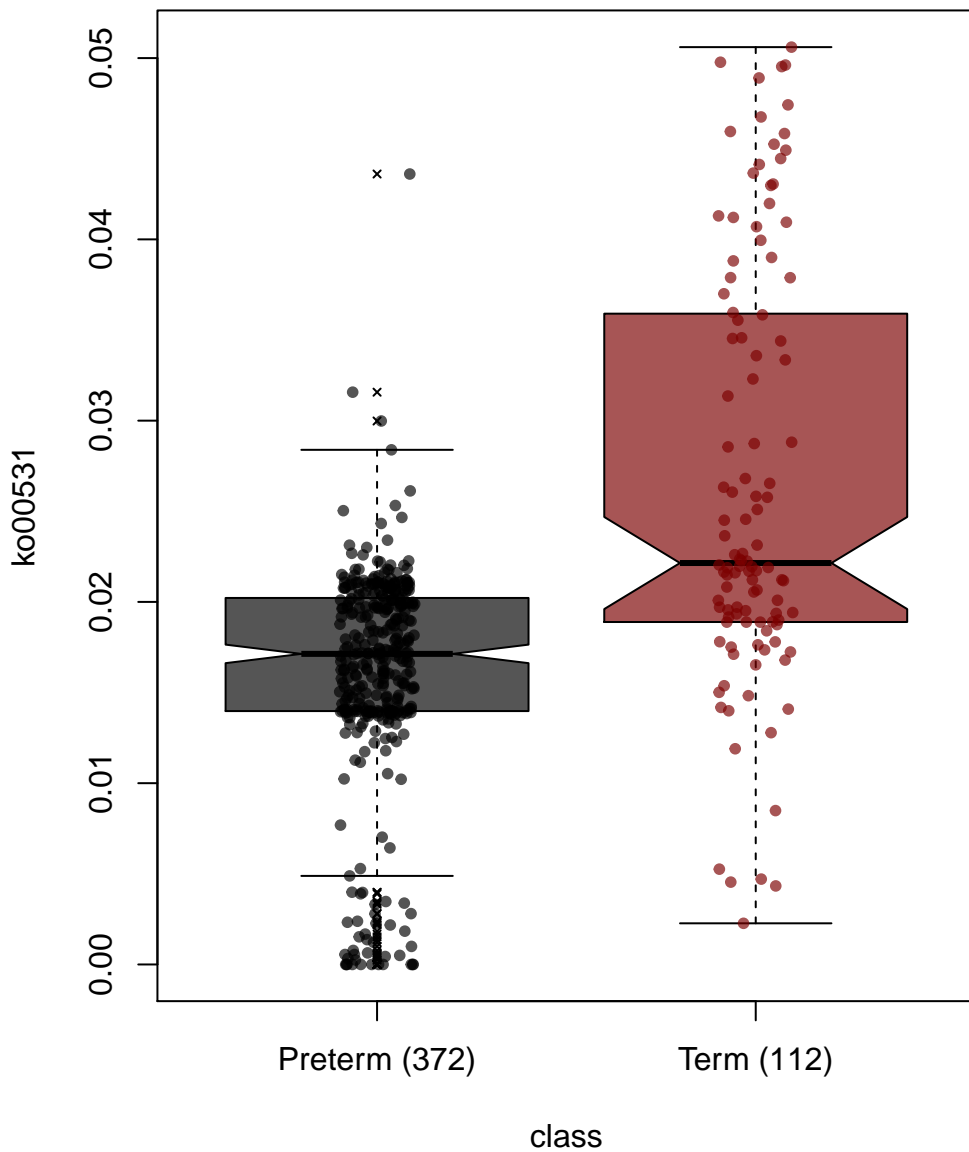

Partial Residual Plot

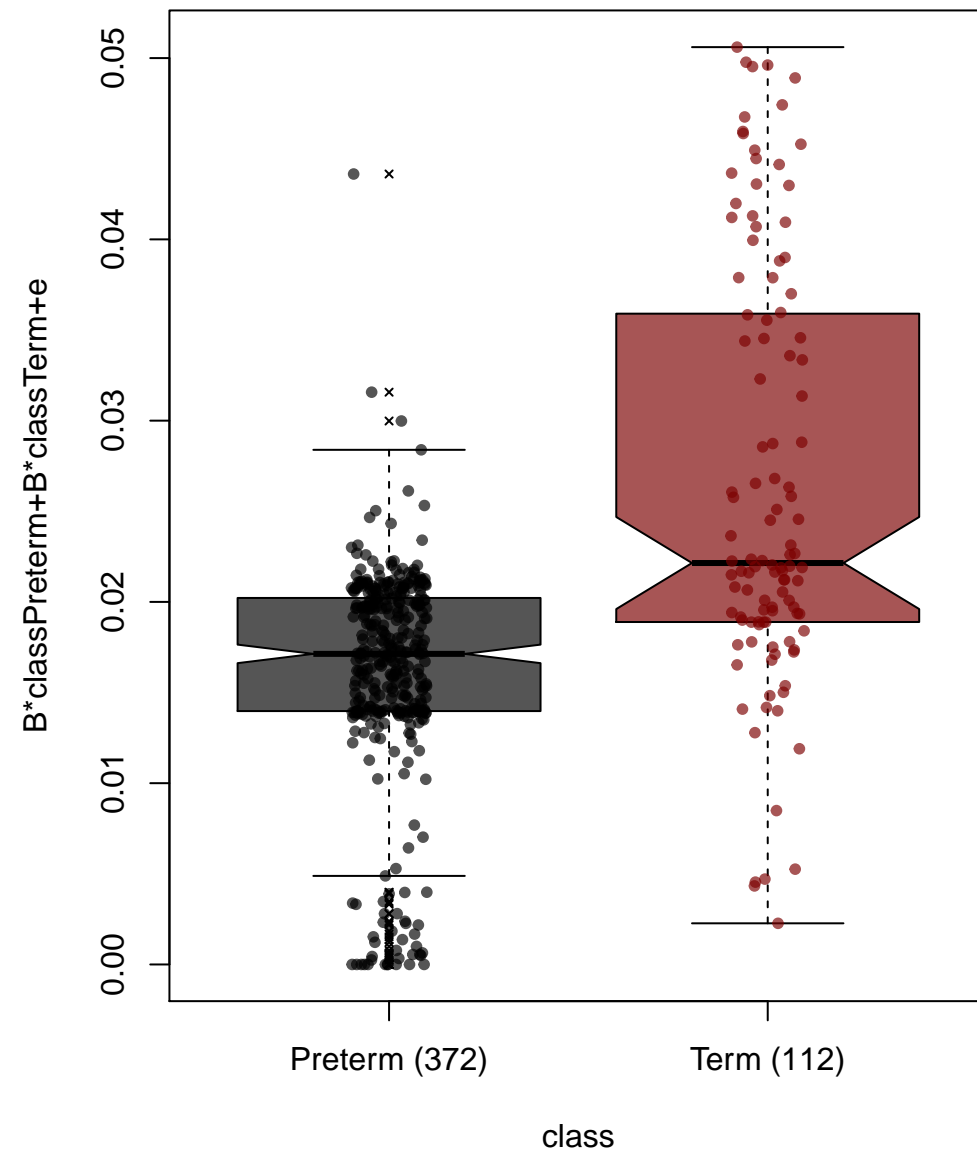

classTerm (0.0177 sd 0.00145, p=3.02e-30, q=3.51e-29)

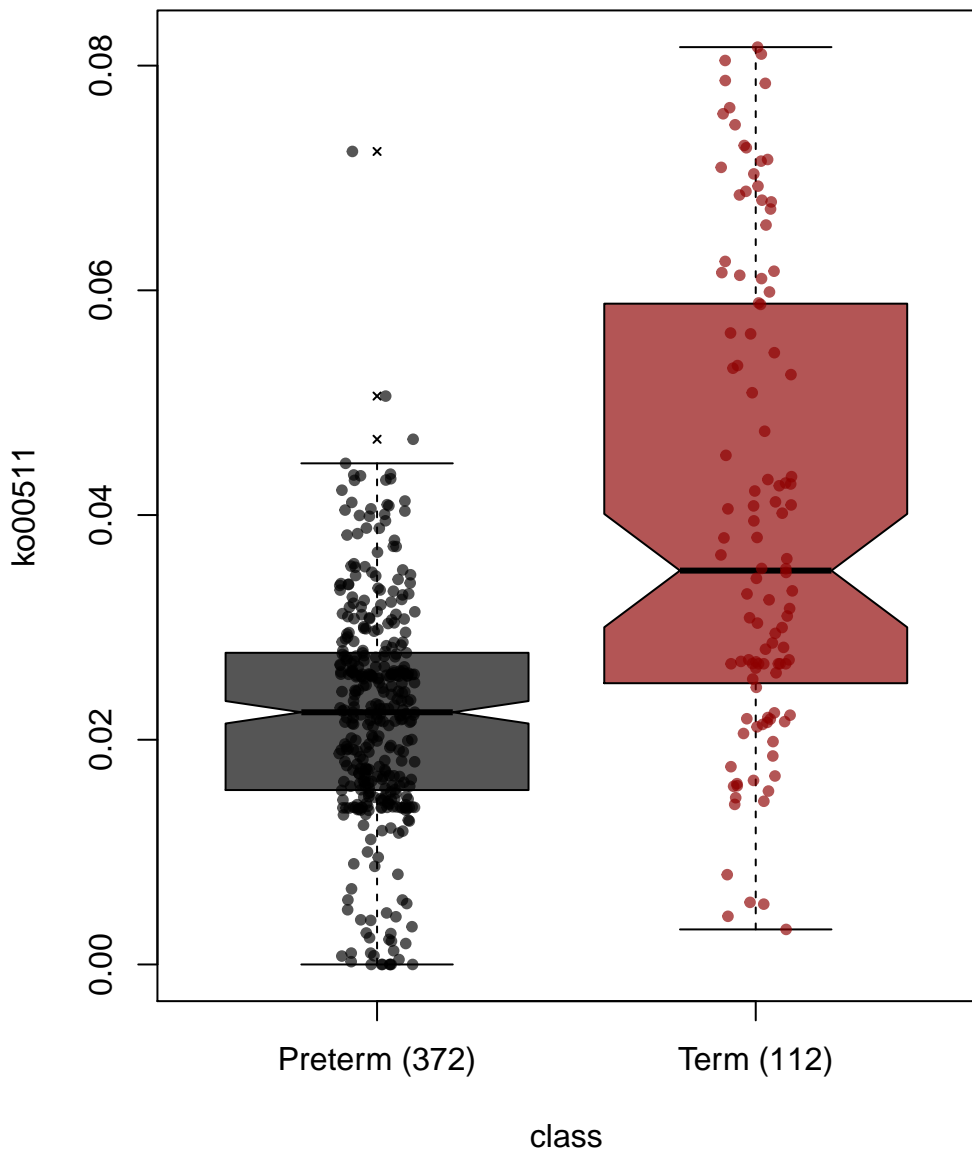

Partial Residual Plot

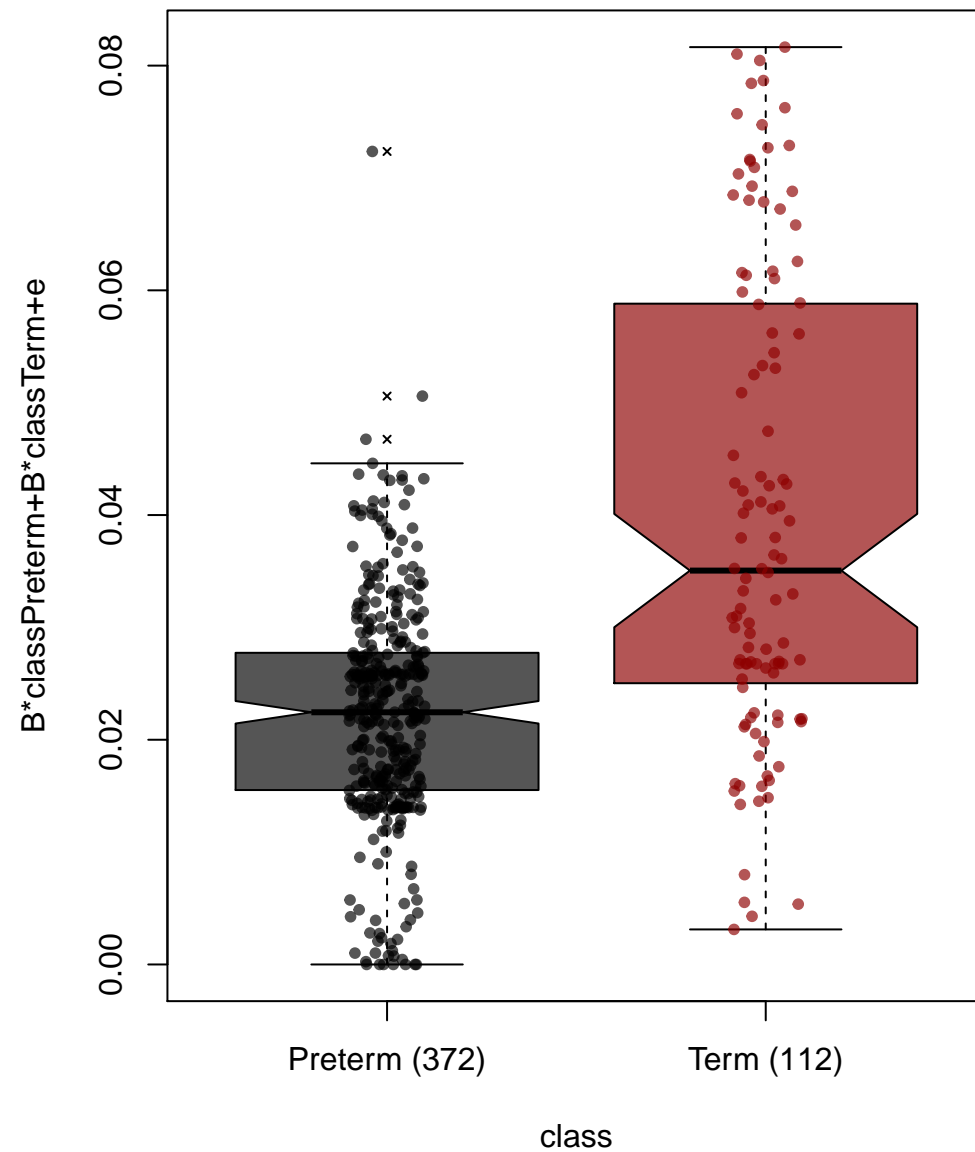

classTerm (0.0161 sd 0.00134, p=2.4e-29, q=2.68e-28)

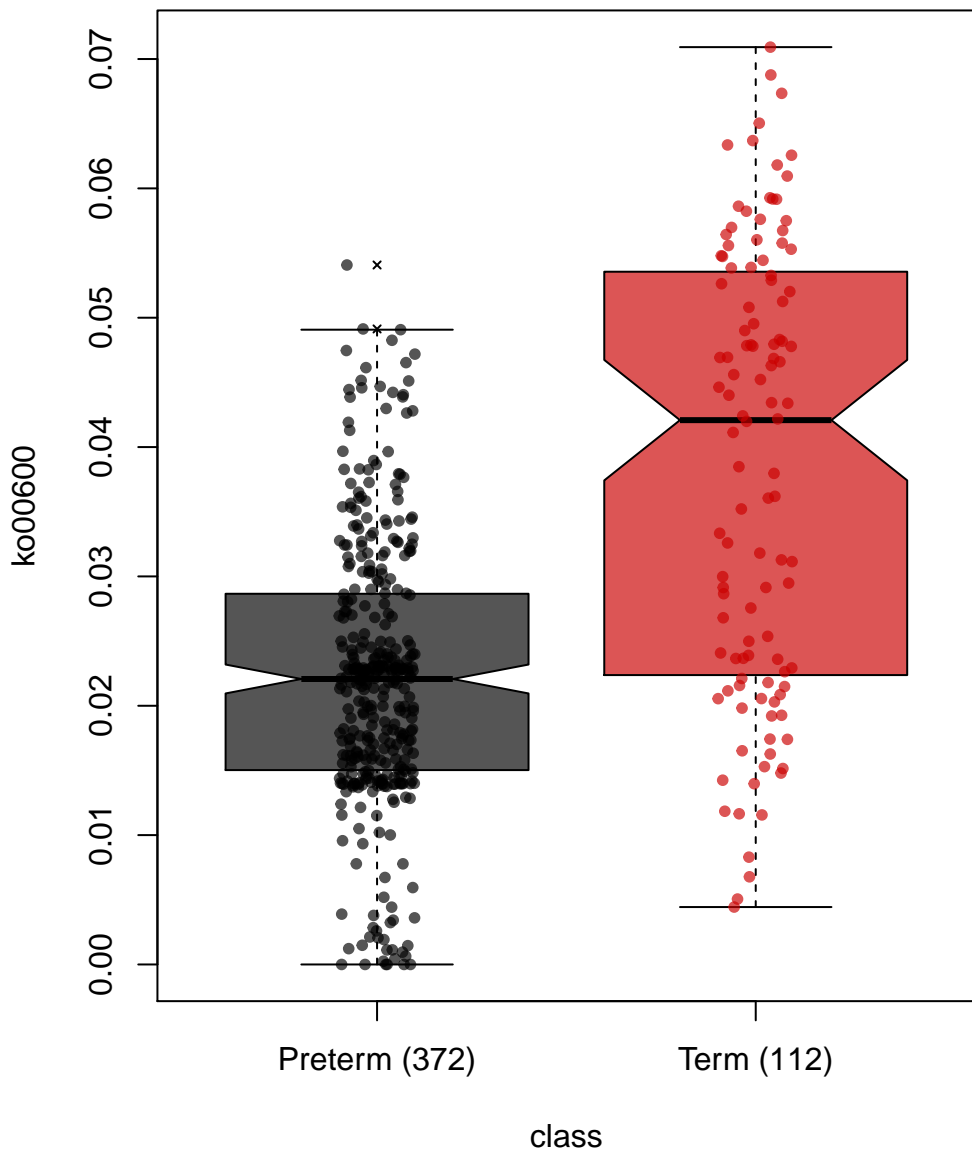

Partial Residual Plot

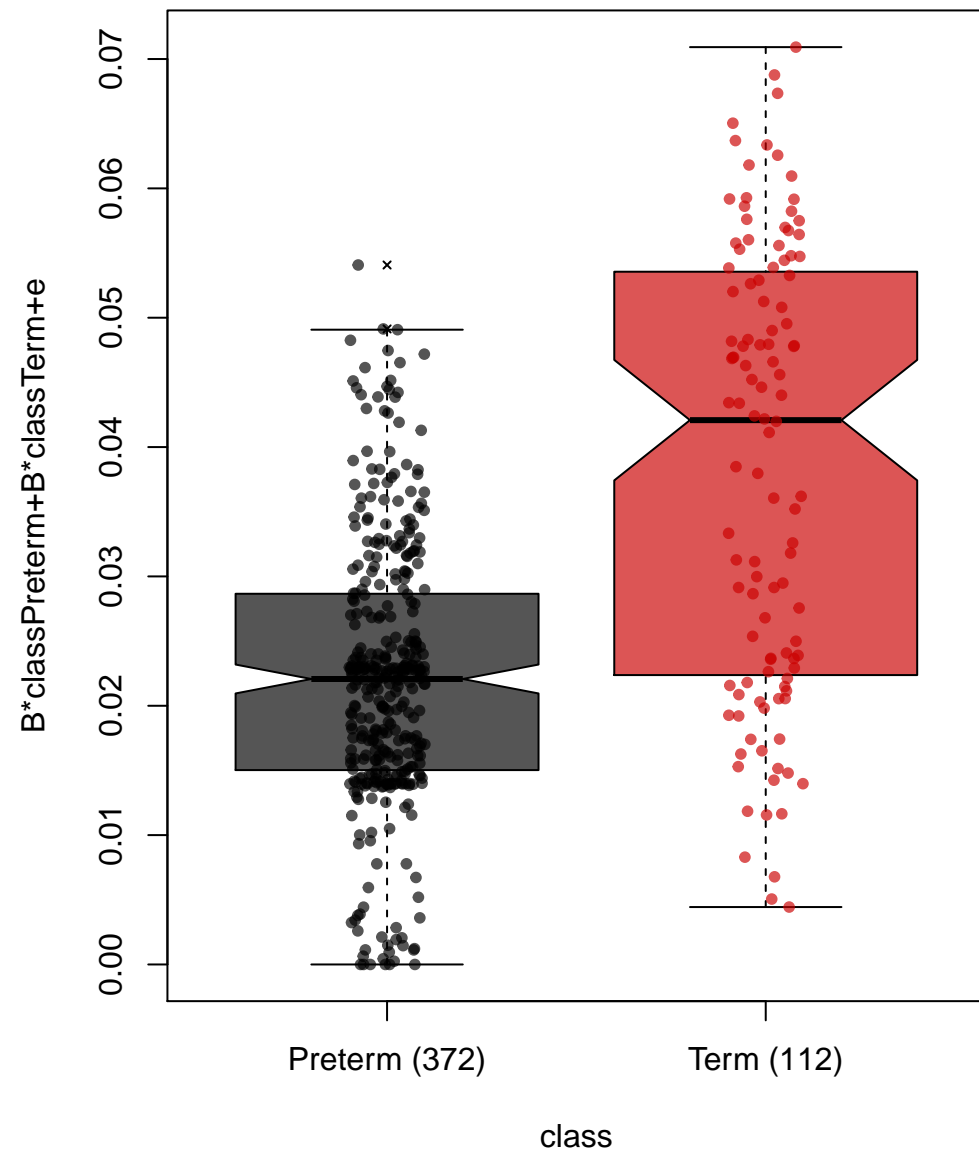

classTerm (0.000607 sd 5.09e-05, p=6e-29, q=6.43e-28)

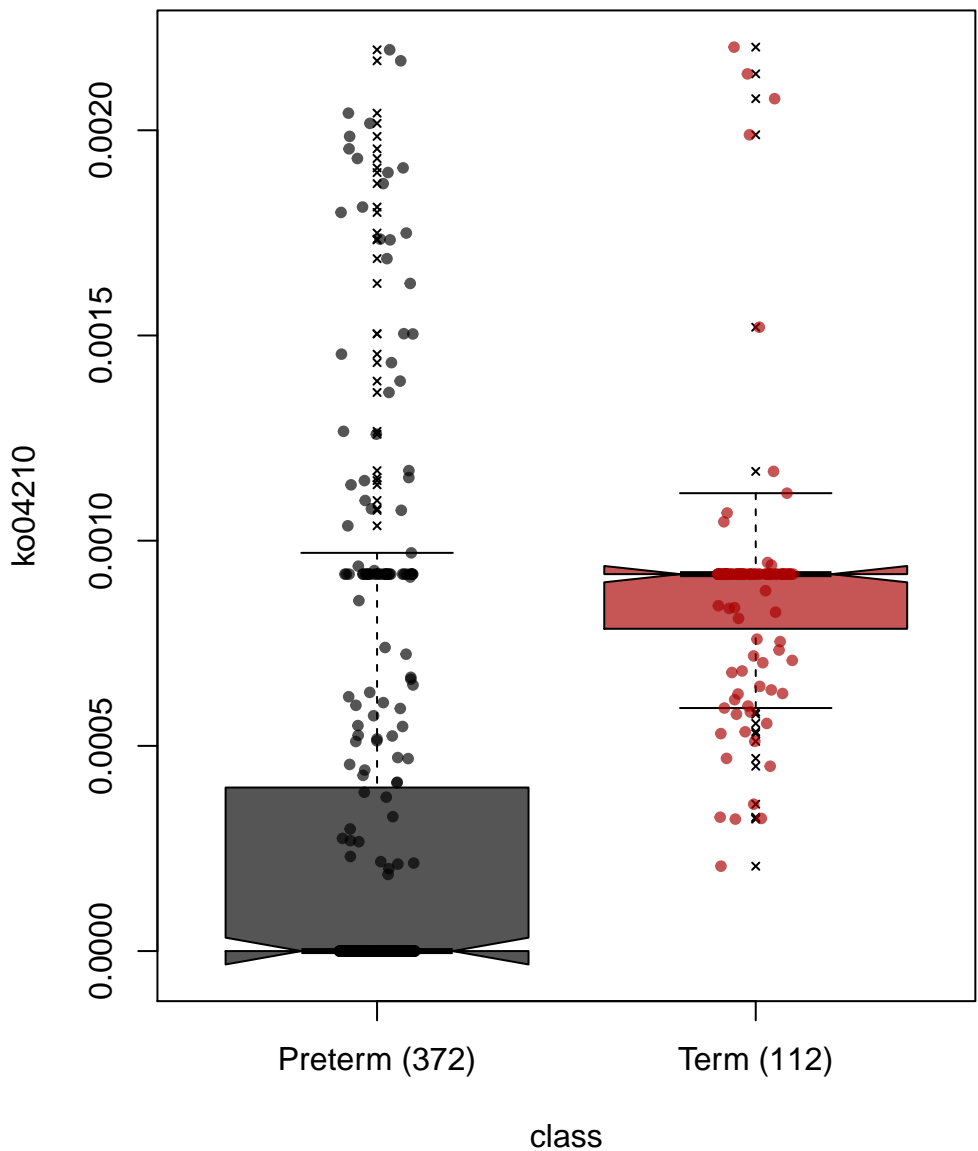

Partial Residual Plot

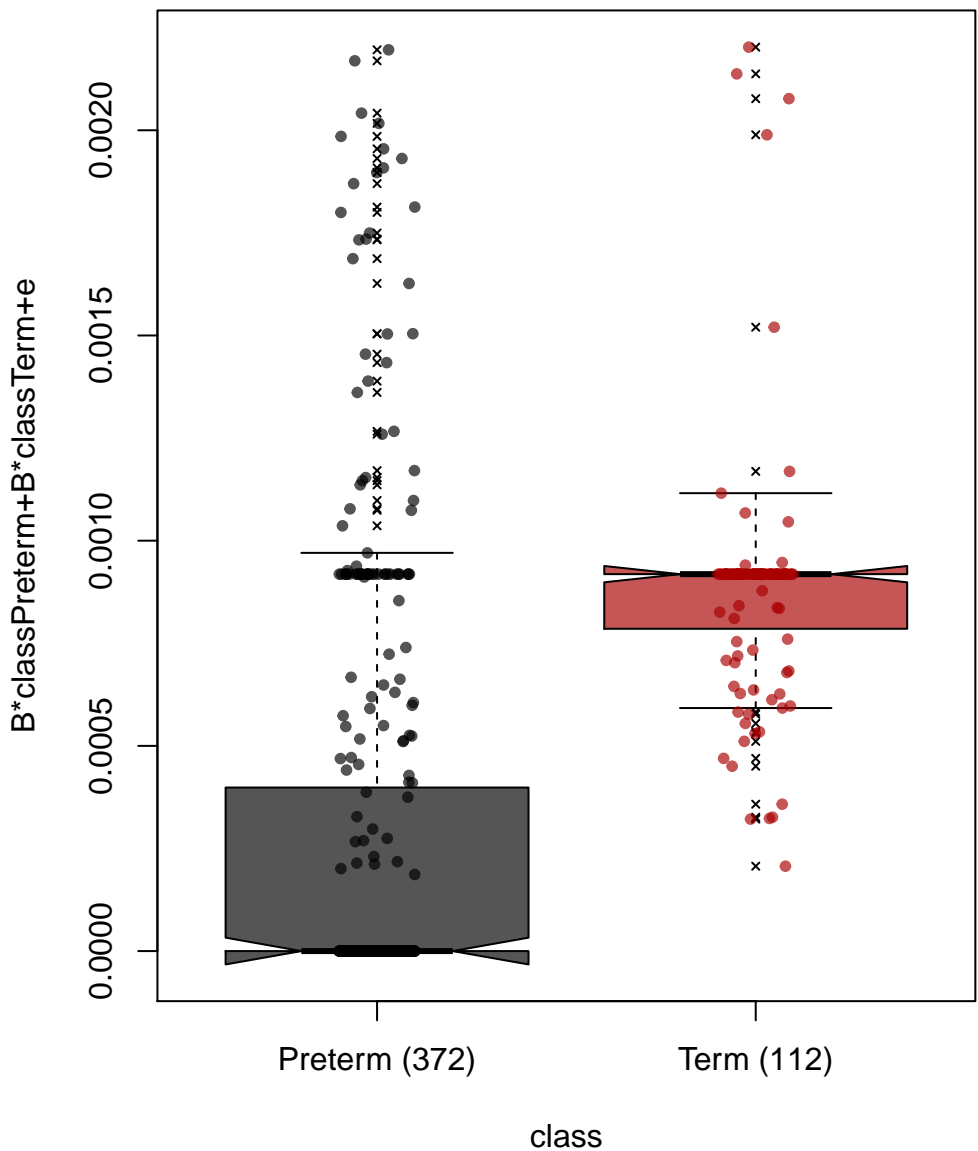

classTerm ( $-0.0255$  sd  $0.00214$ ,  $p=1.02e-28$ ,  $q=1.05e-27$ )

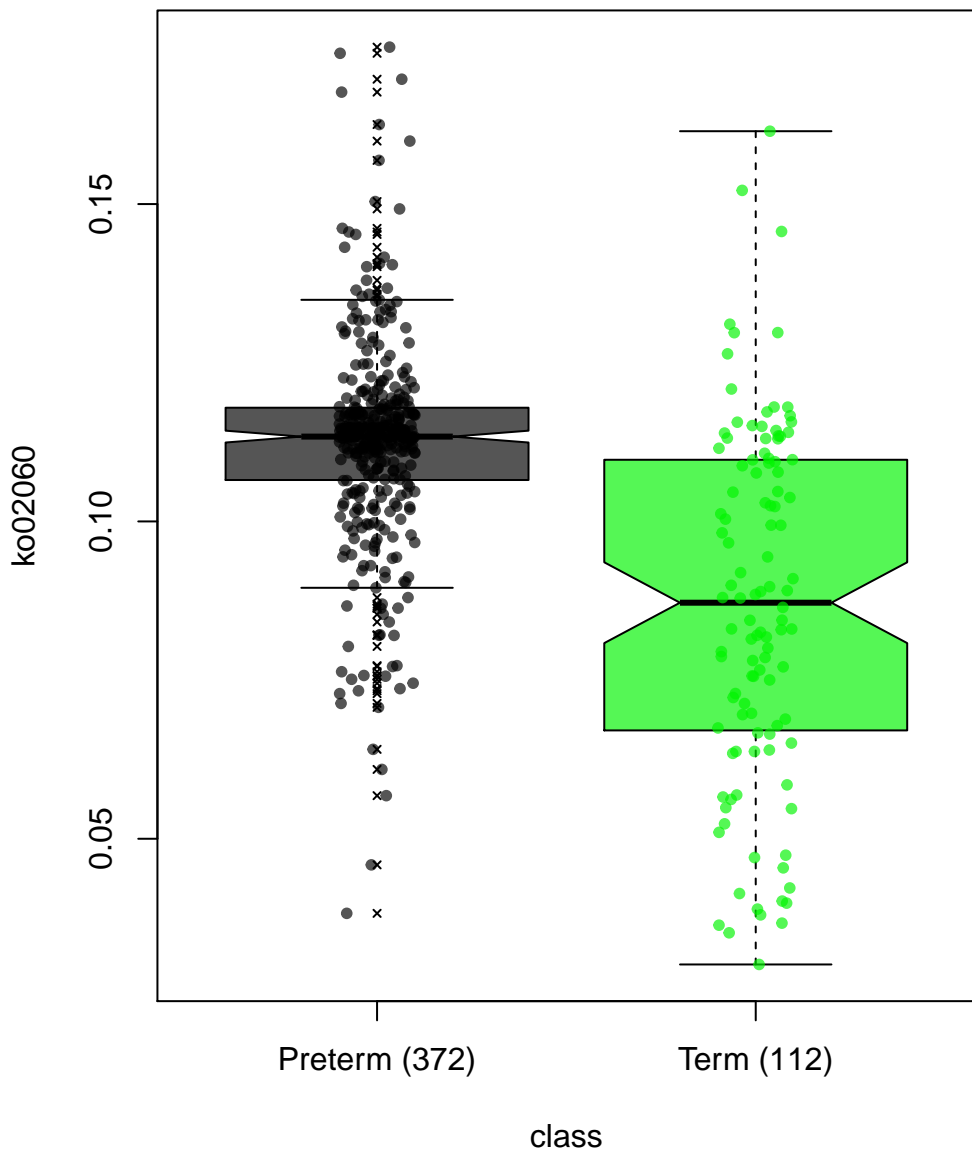

Partial Residual Plot

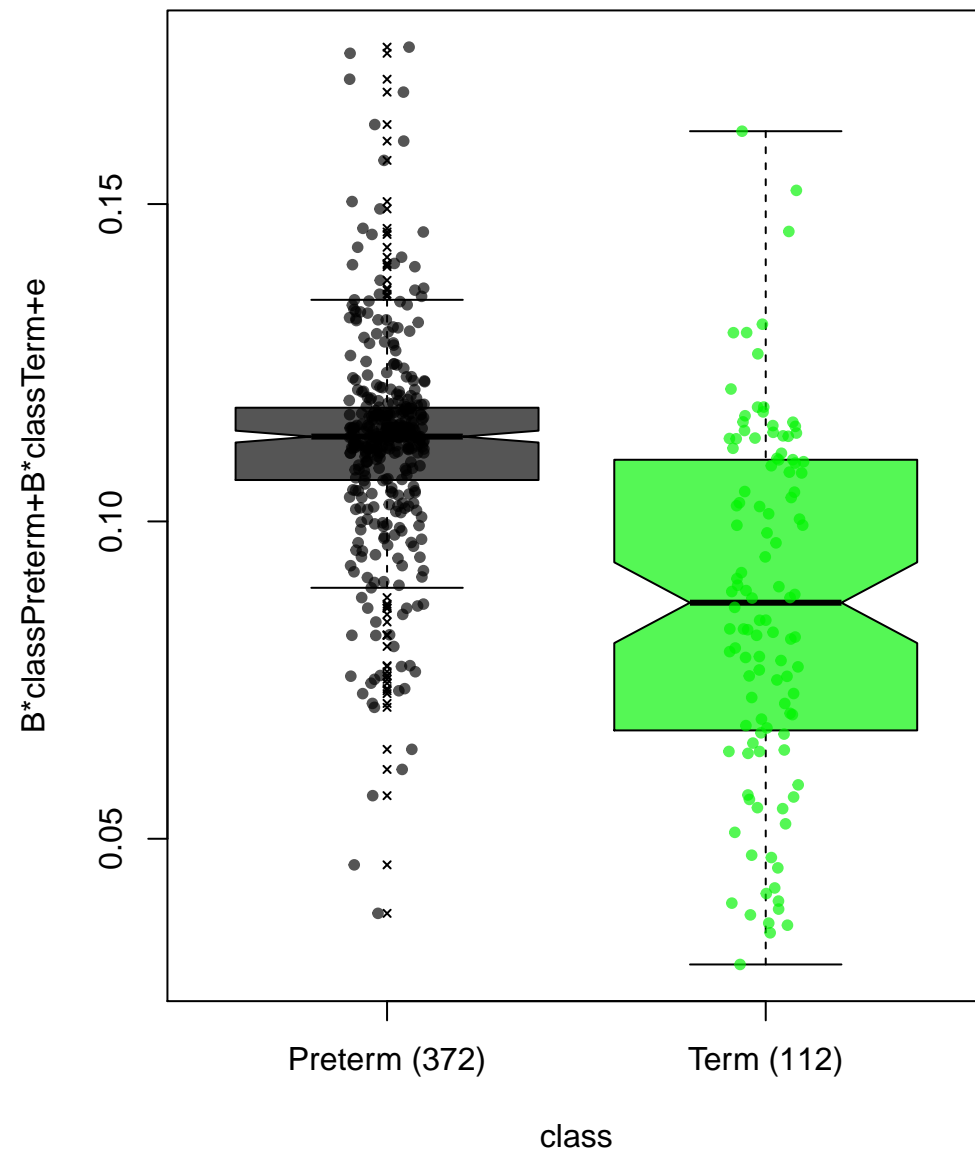



classTerm (0.00424 sd 0.000359, p=2.45e-28, q=2.44e-27)

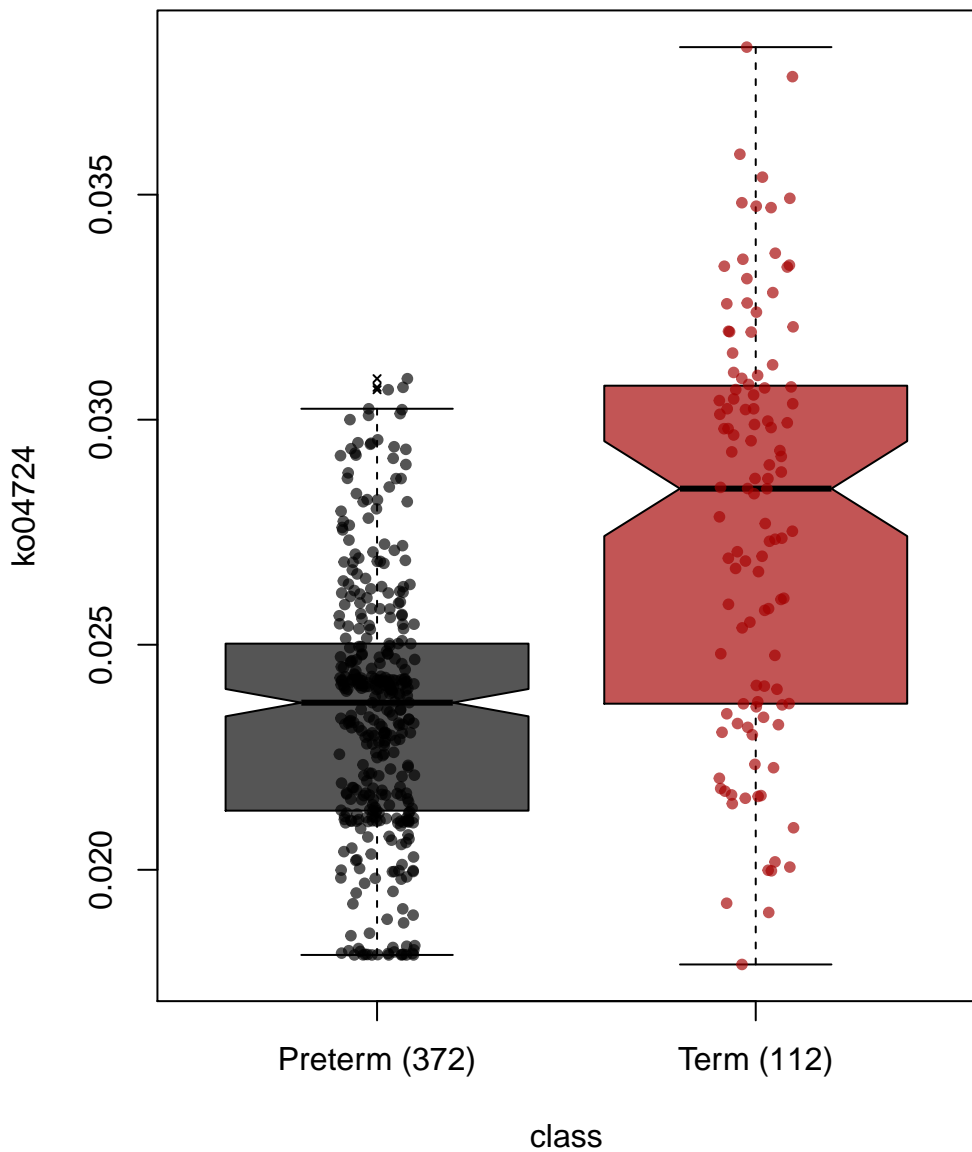

Partial Residual Plot

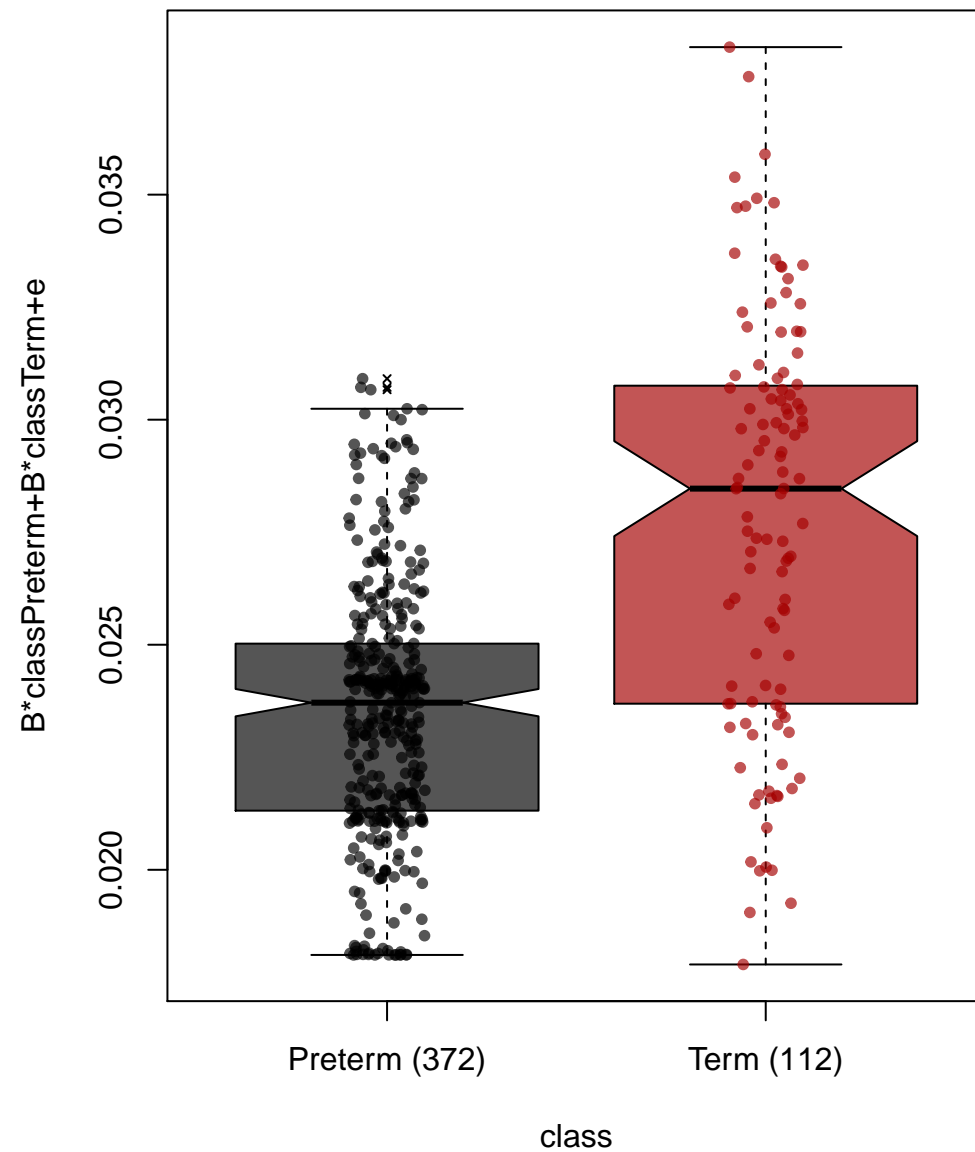

classTerm (0.000575 sd 4.9e-05, p=3.97e-28, q=3.82e-27)

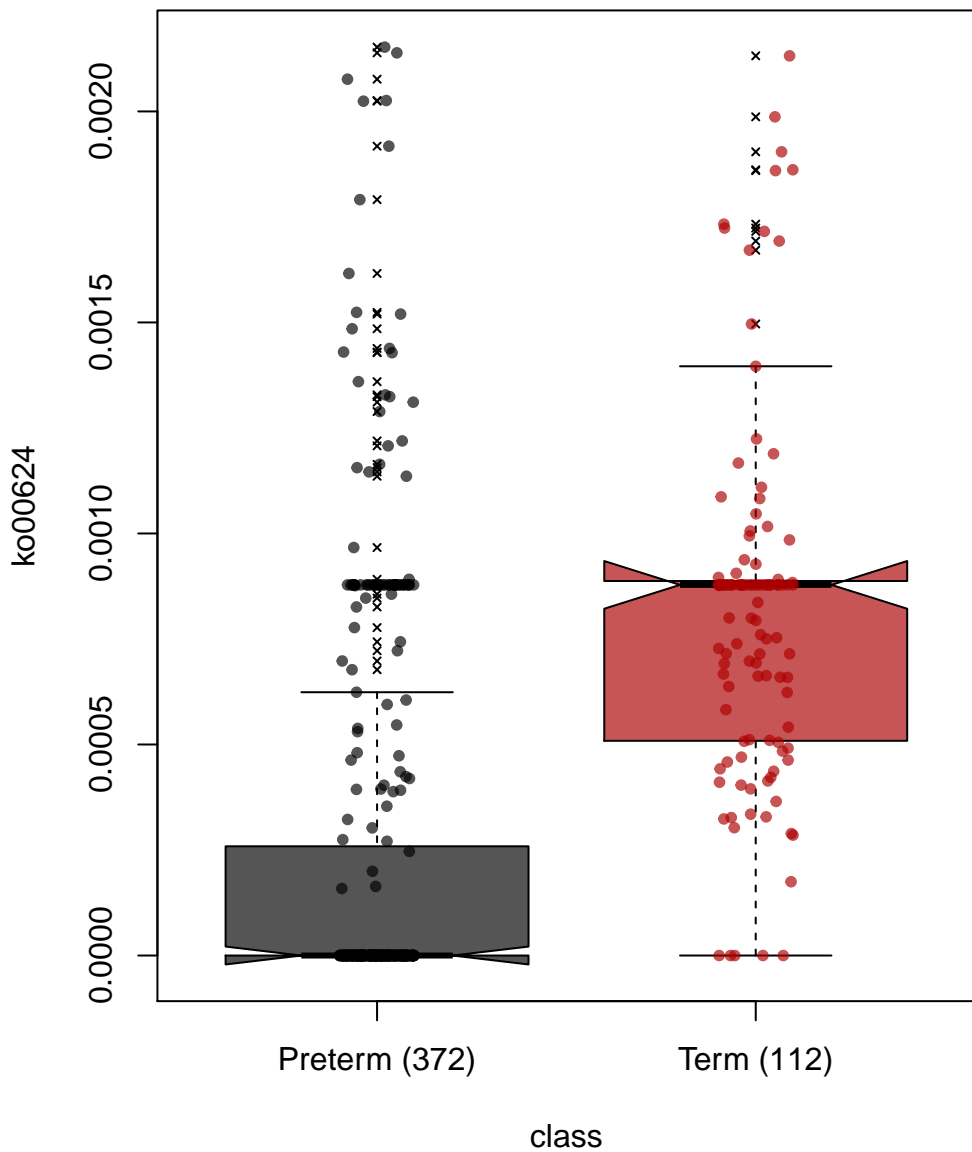

Partial Residual Plot

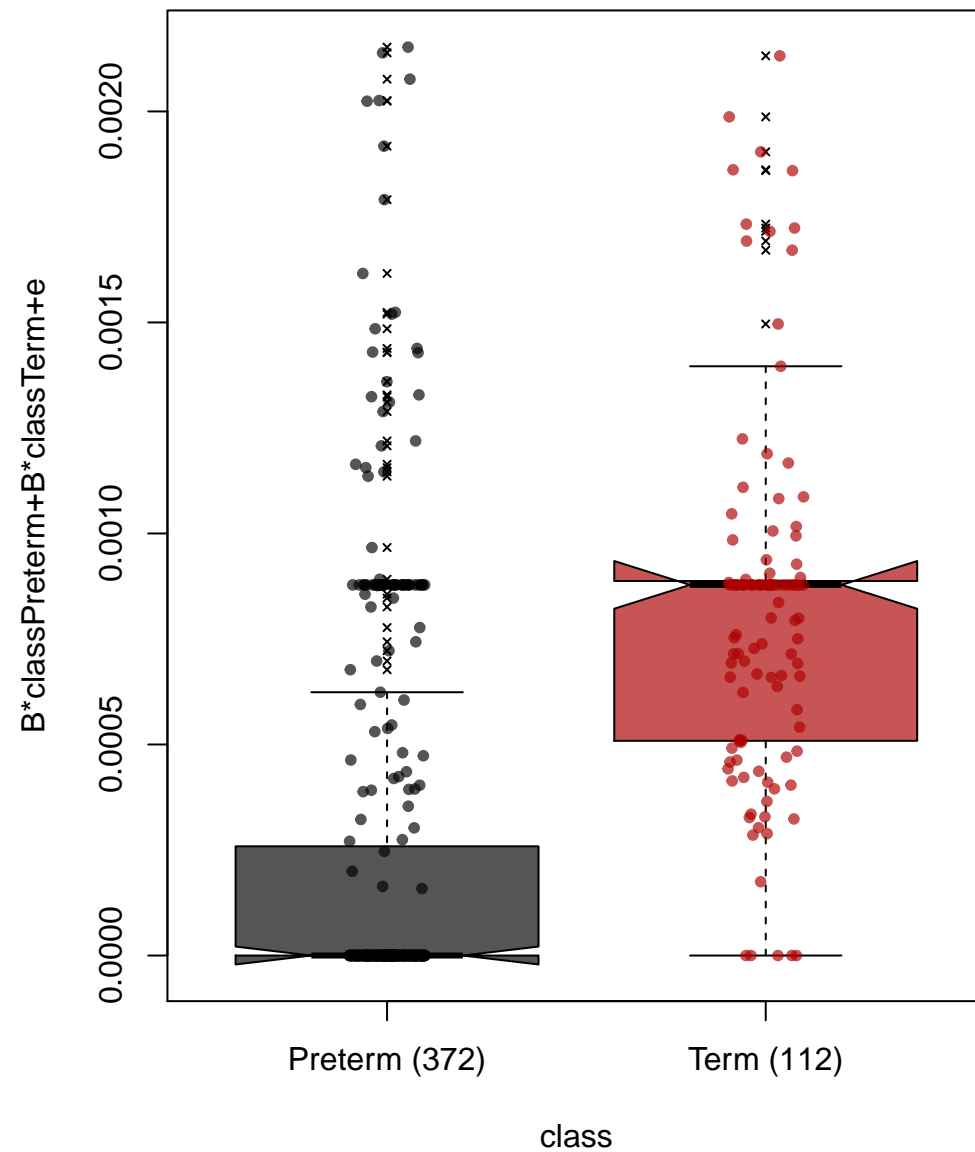

classTerm (0.0137 sd 0.00118, p=1.5e-27, q=1.4e-26)

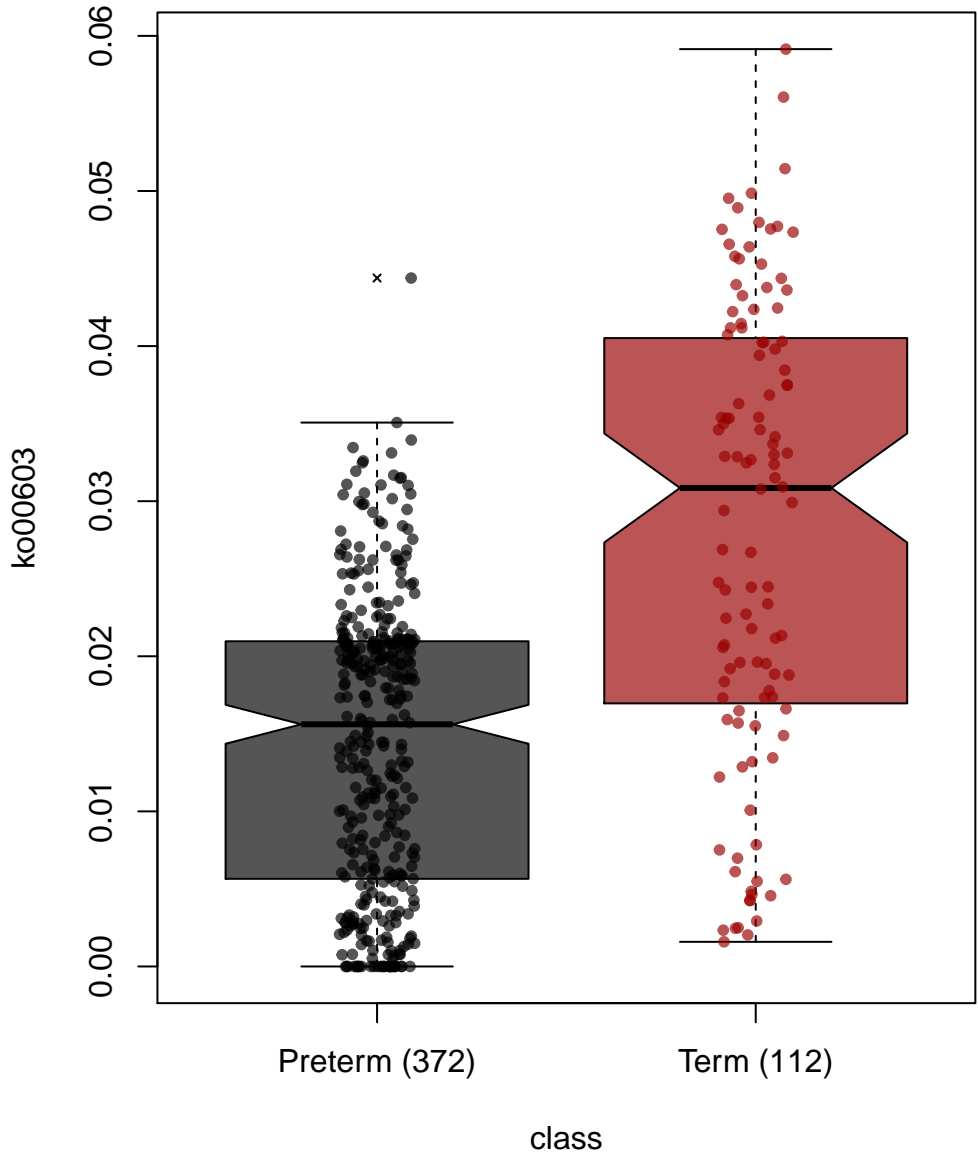

Partial Residual Plot

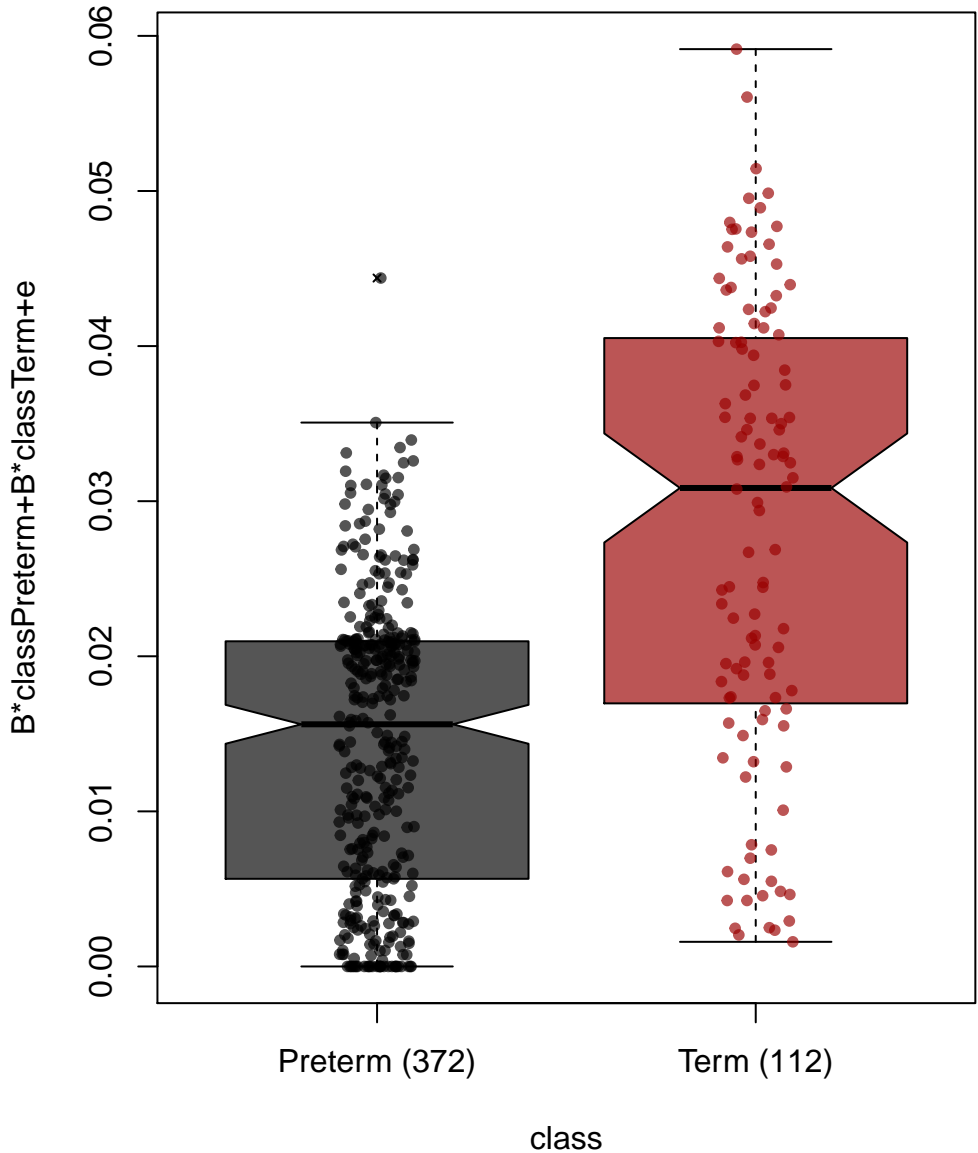

classTerm (0.0125 sd 0.00108, p=1.73e-27, q=1.56e-26)

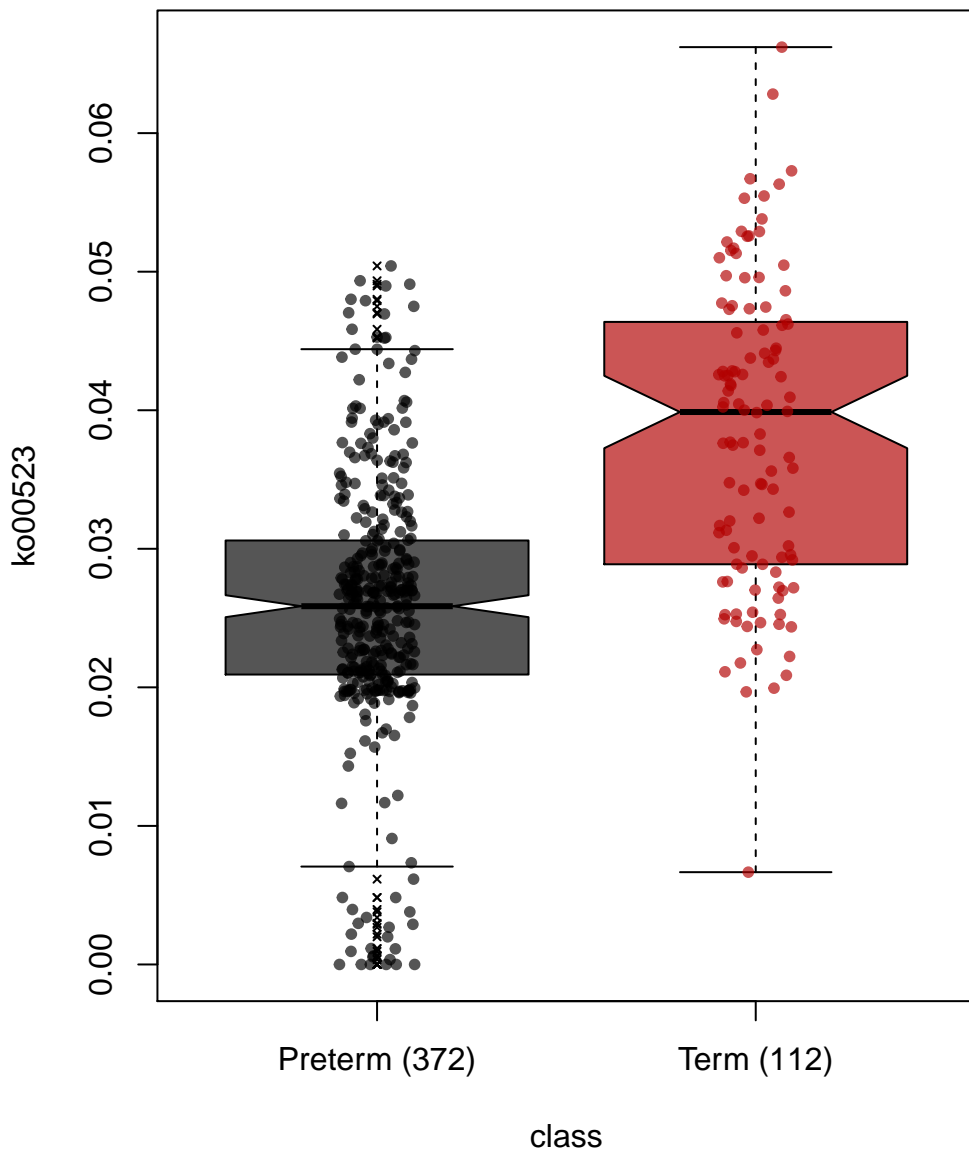

Partial Residual Plot

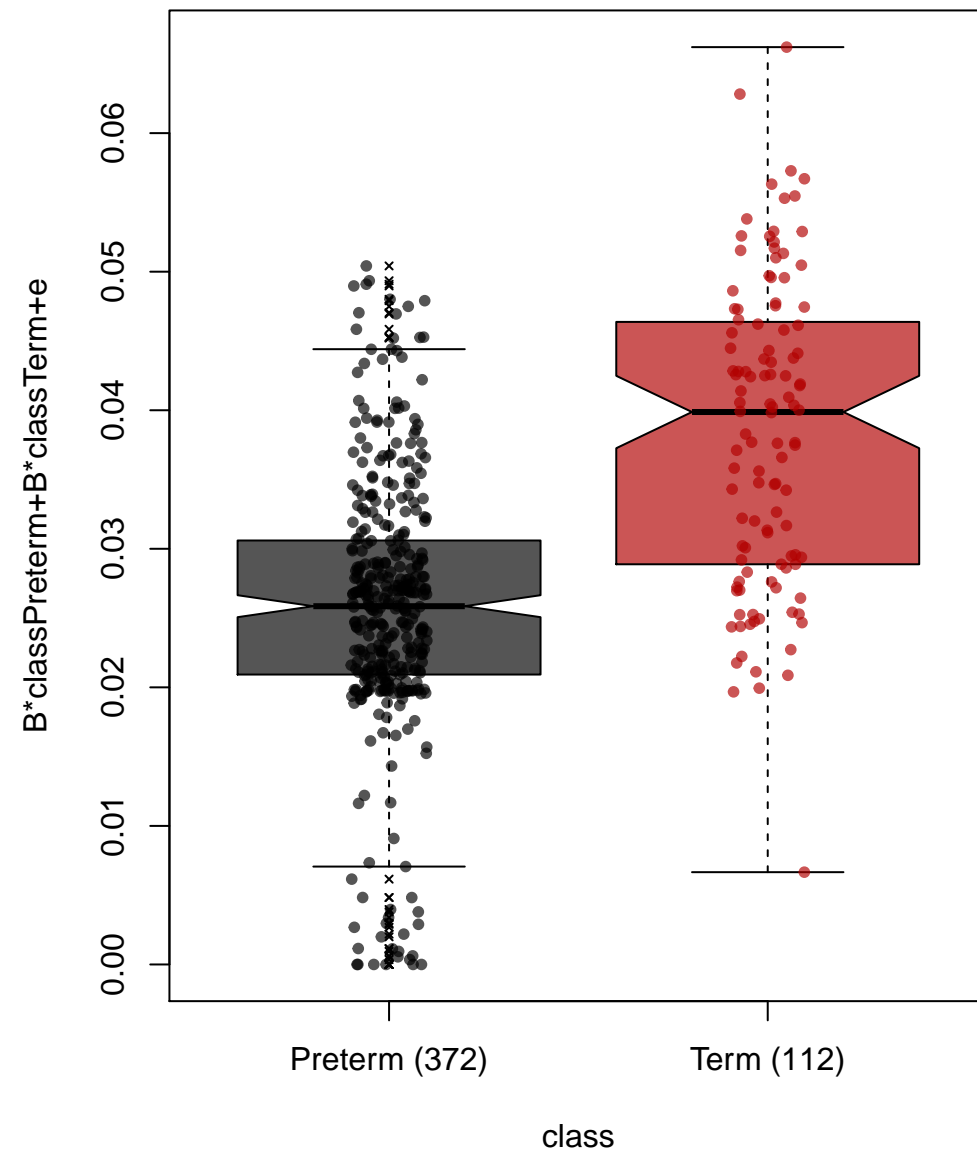

classTerm (0.00862 sd 0.000748, p=2.74e-27, q=2.39e-26)

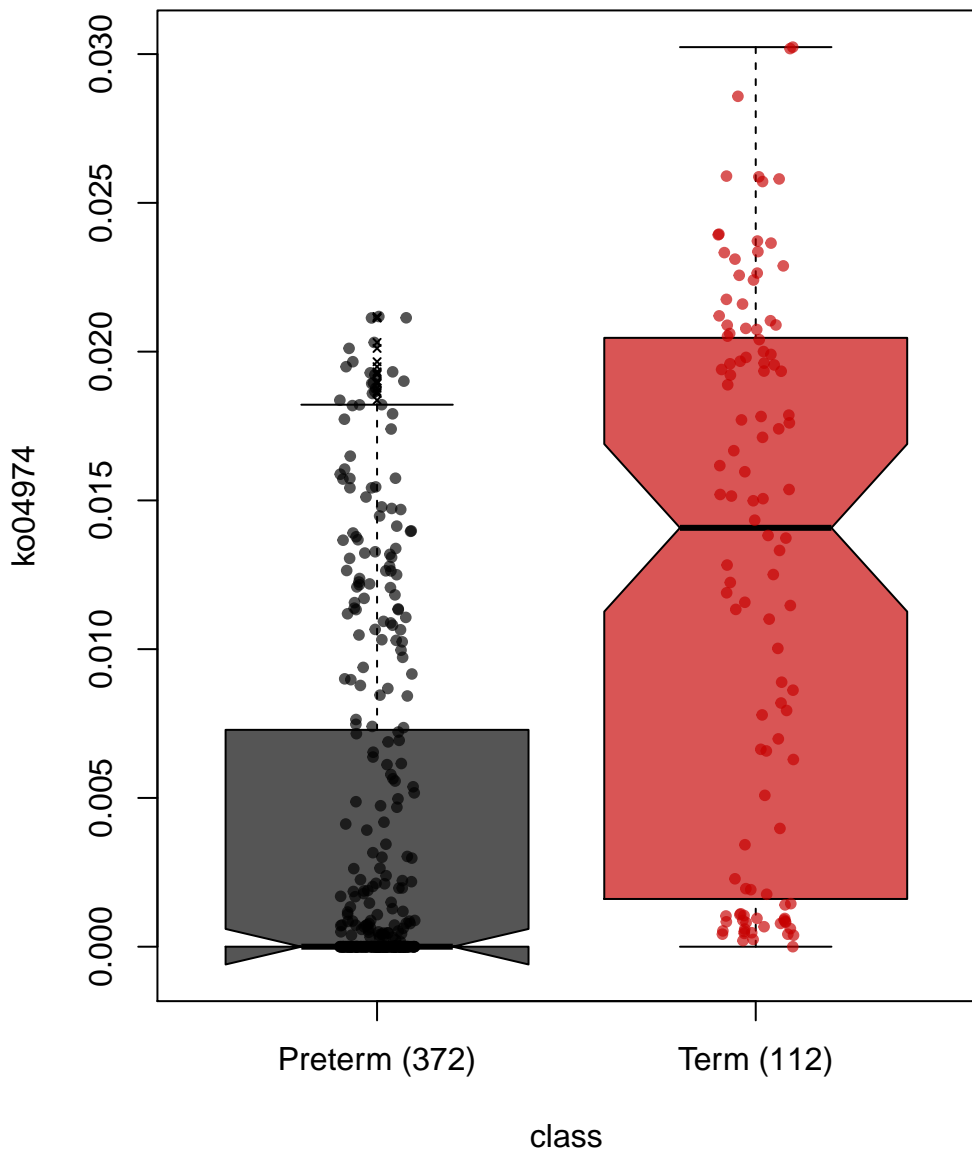

Partial Residual Plot

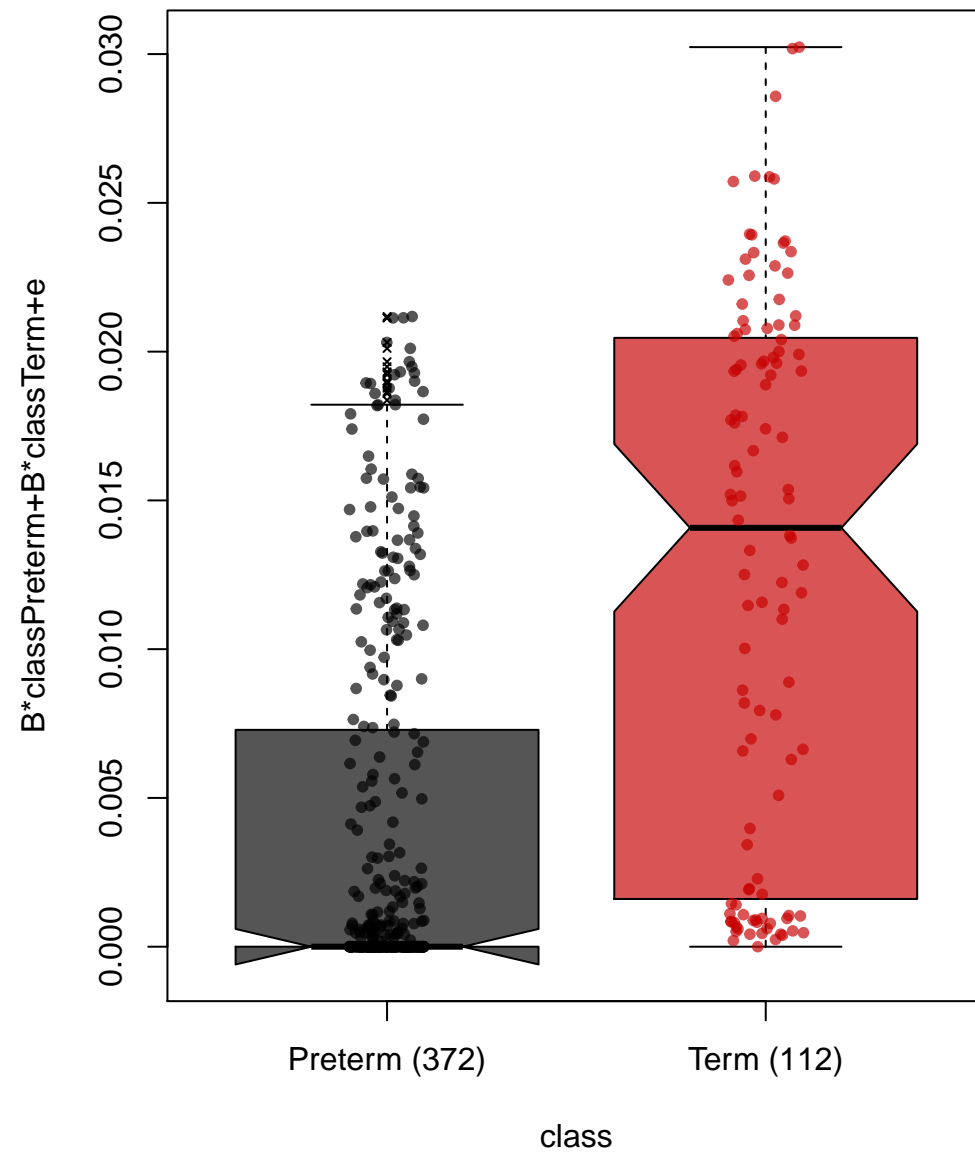

classTerm (0.00566 sd 0.000503, p=2.77e-26, q=2.34e-25)

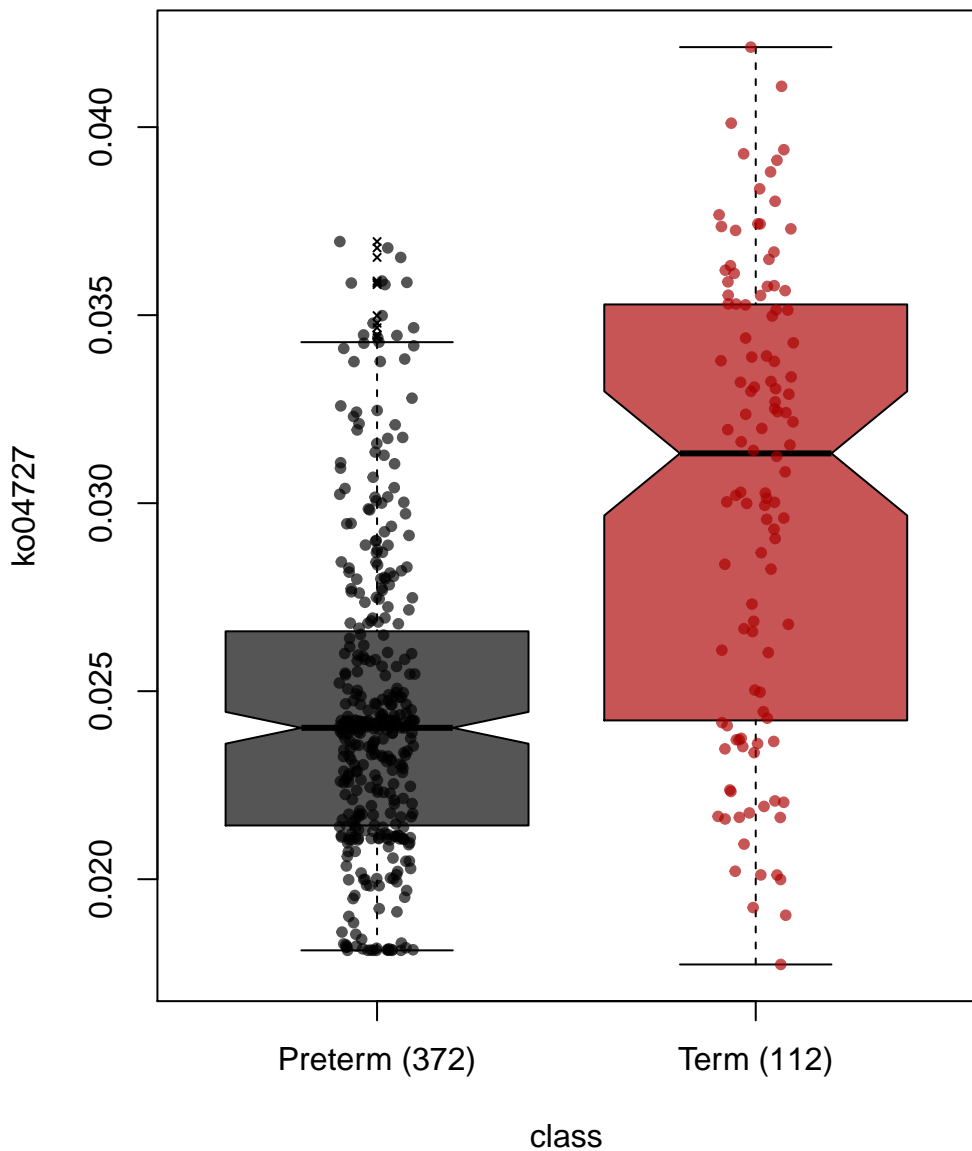

Partial Residual Plot

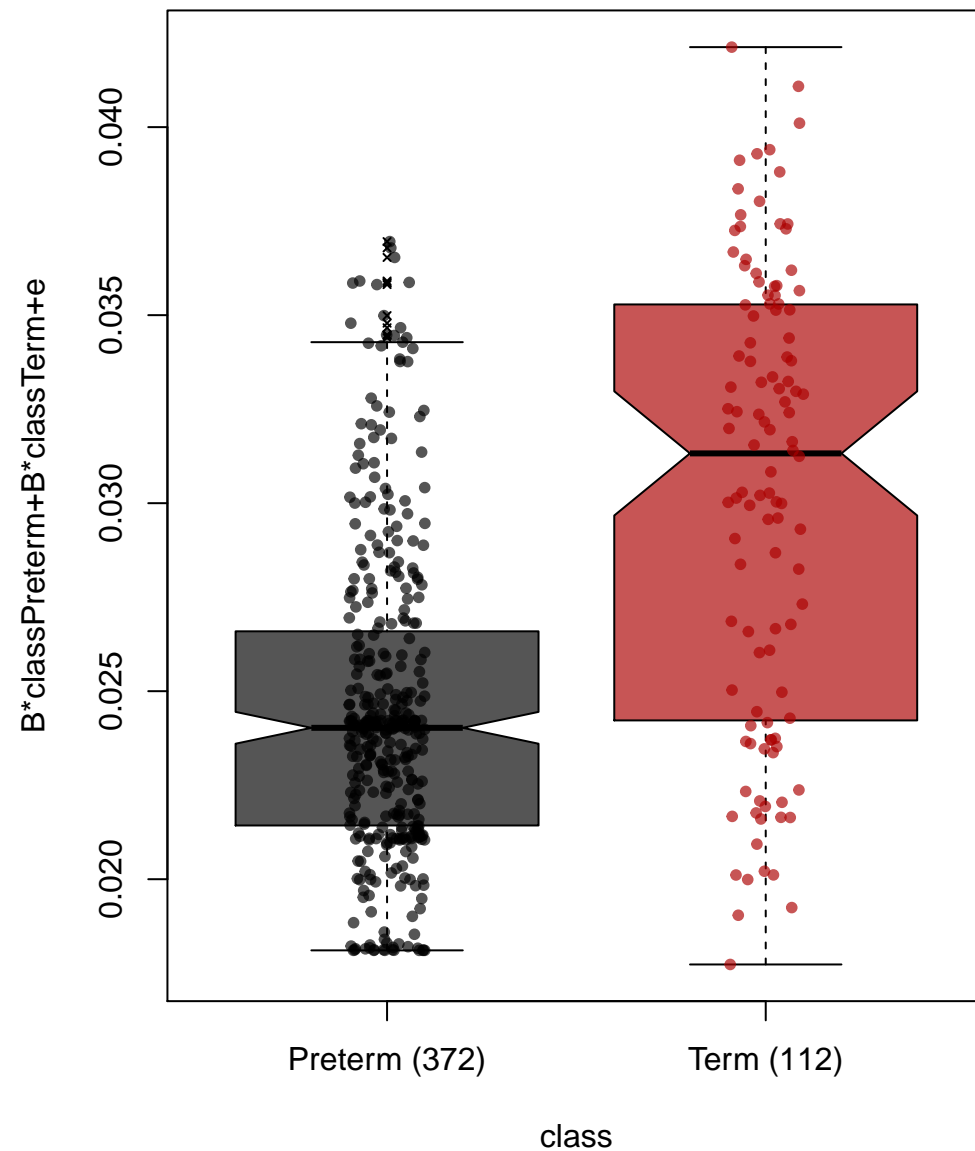

classTerm (−0.00515 sd 0.000482, p=4.83e−24, q=3.97e−23)

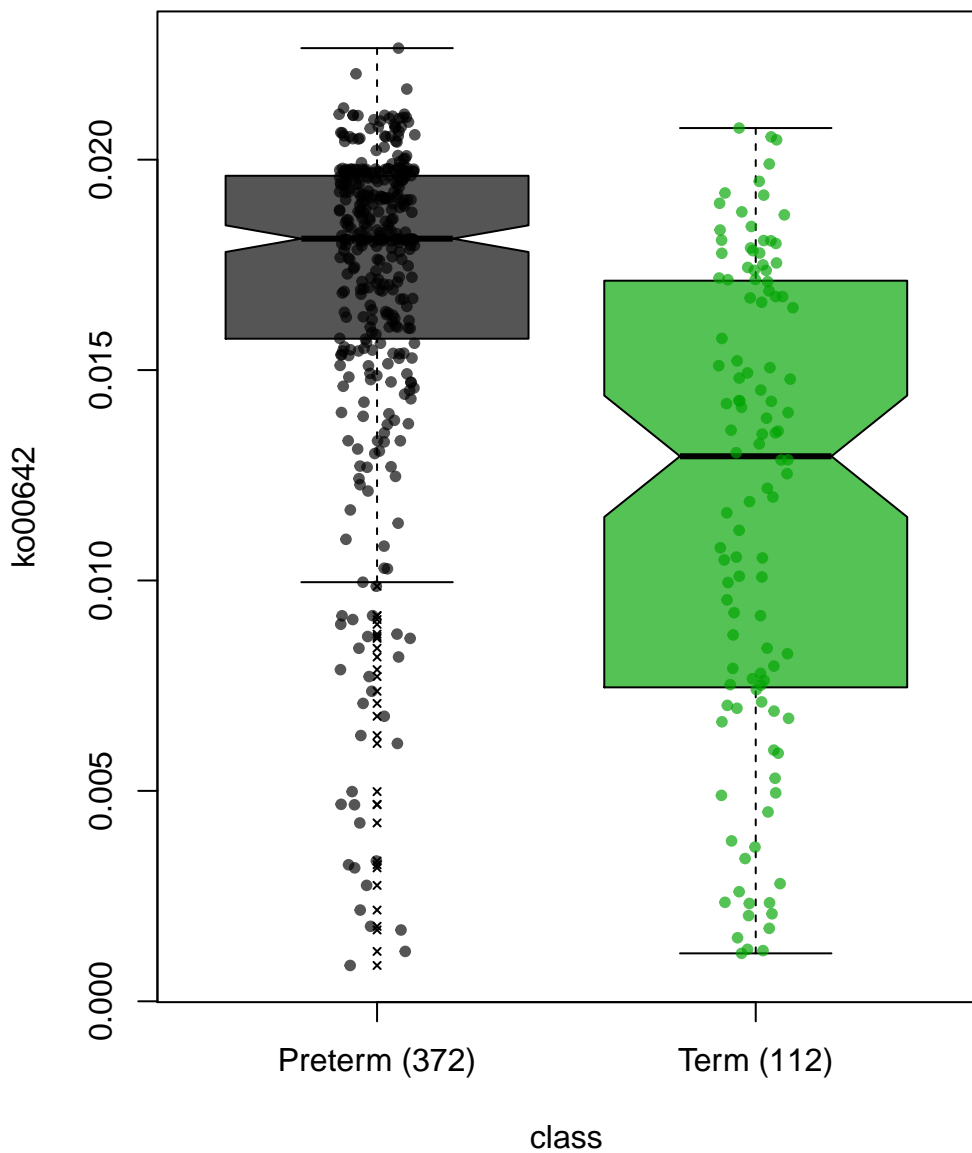

Partial Residual Plot

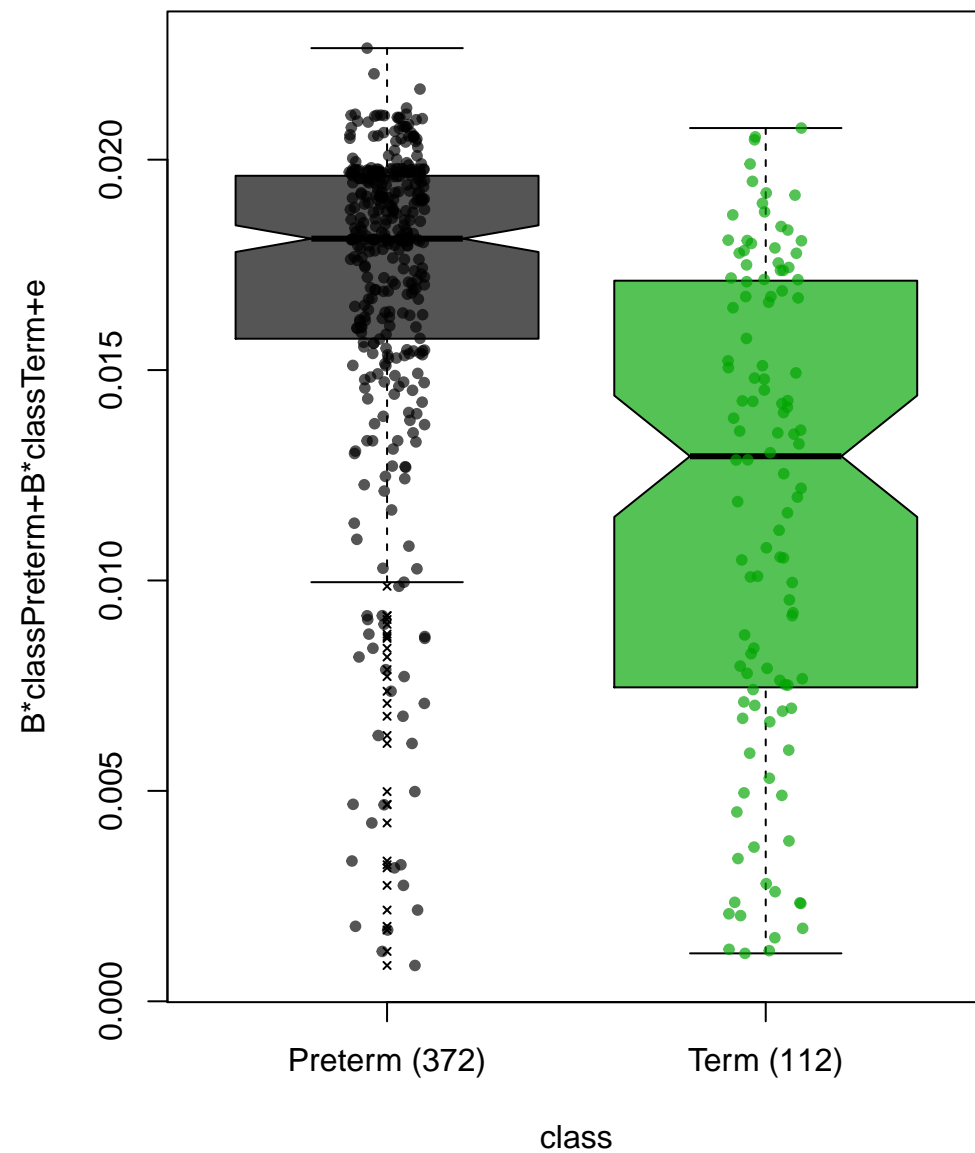

classTerm (0.00877 sd 0.000825, p=7.47e-24, q=5.96e-23)

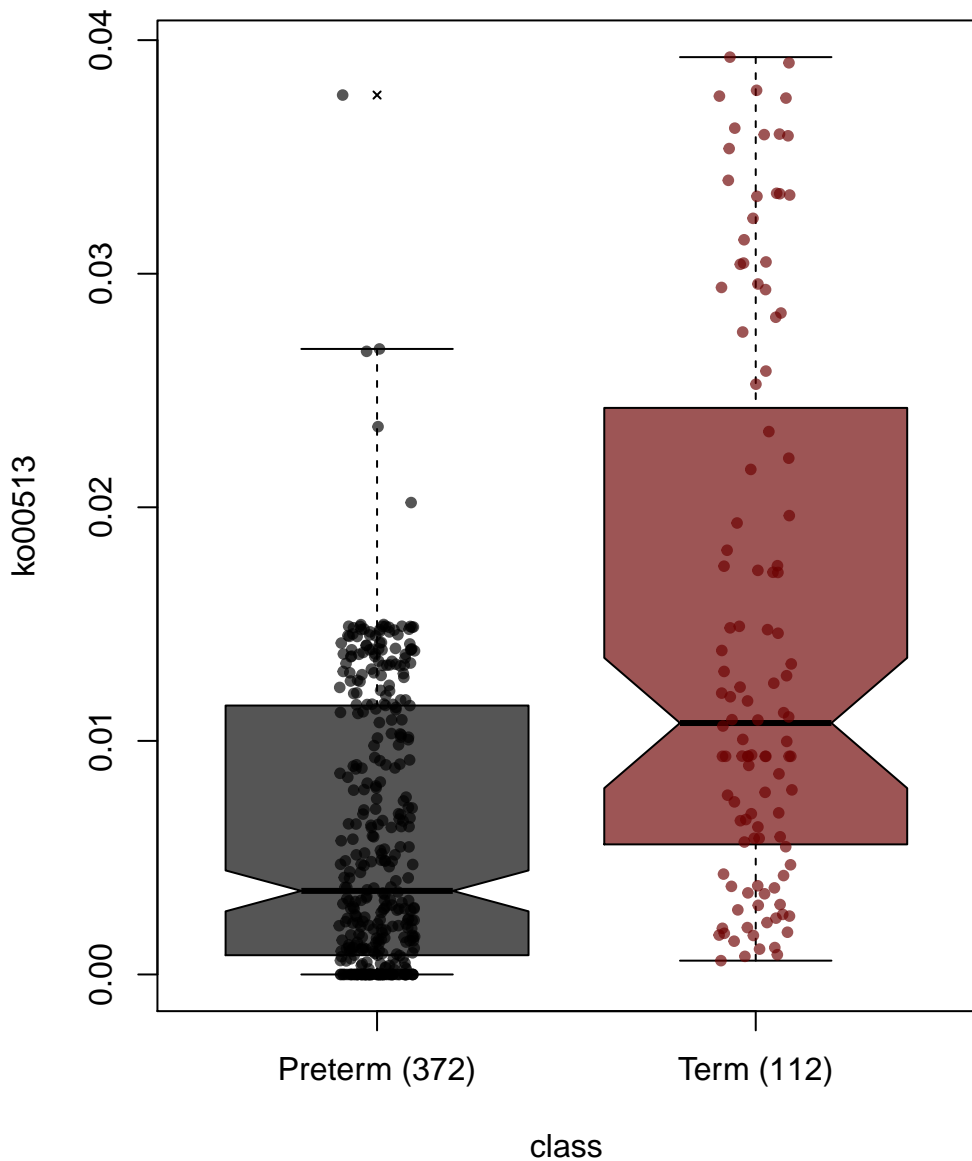

Partial Residual Plot

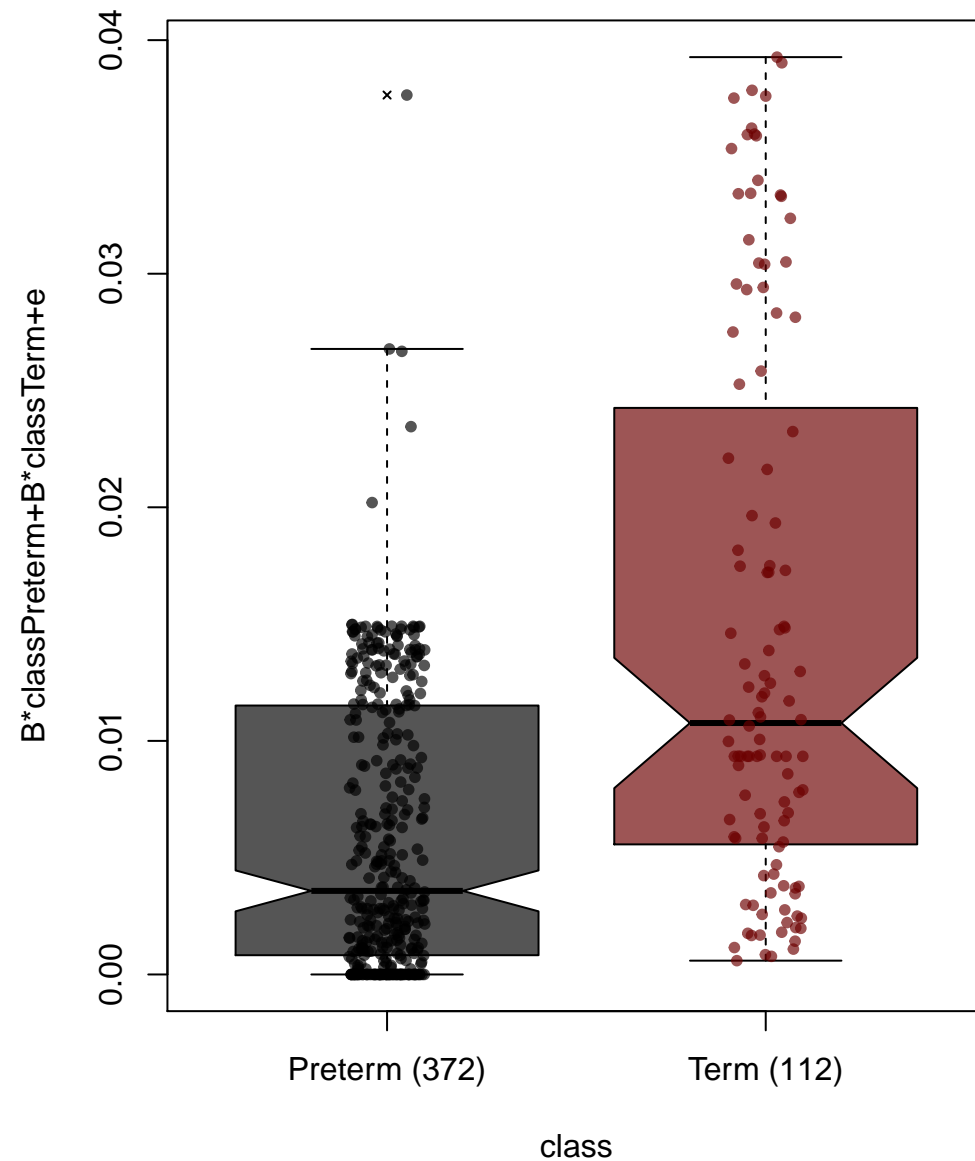



classTerm (0.000442 sd 4.16e-05, p=7.89e-24, q=6.11e-23)

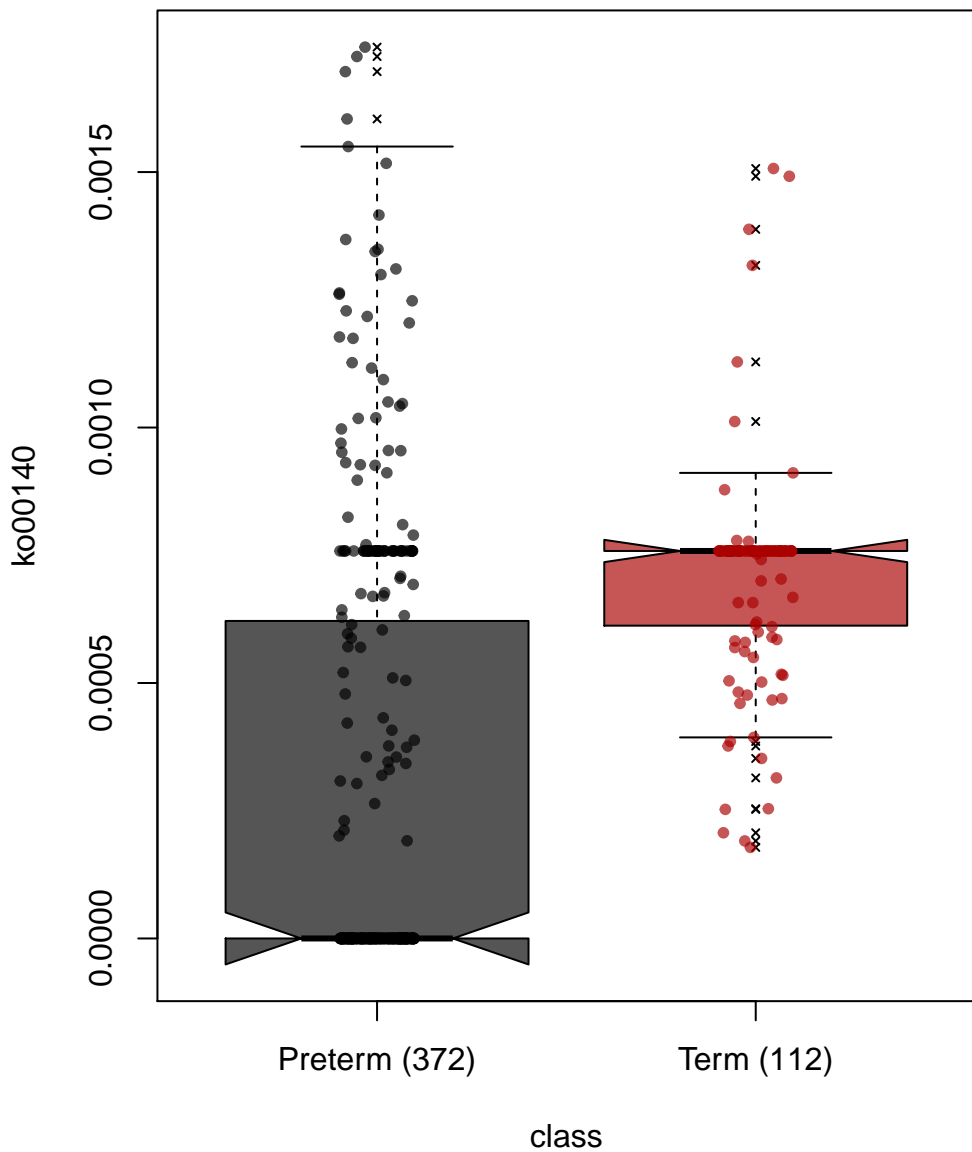

Partial Residual Plot

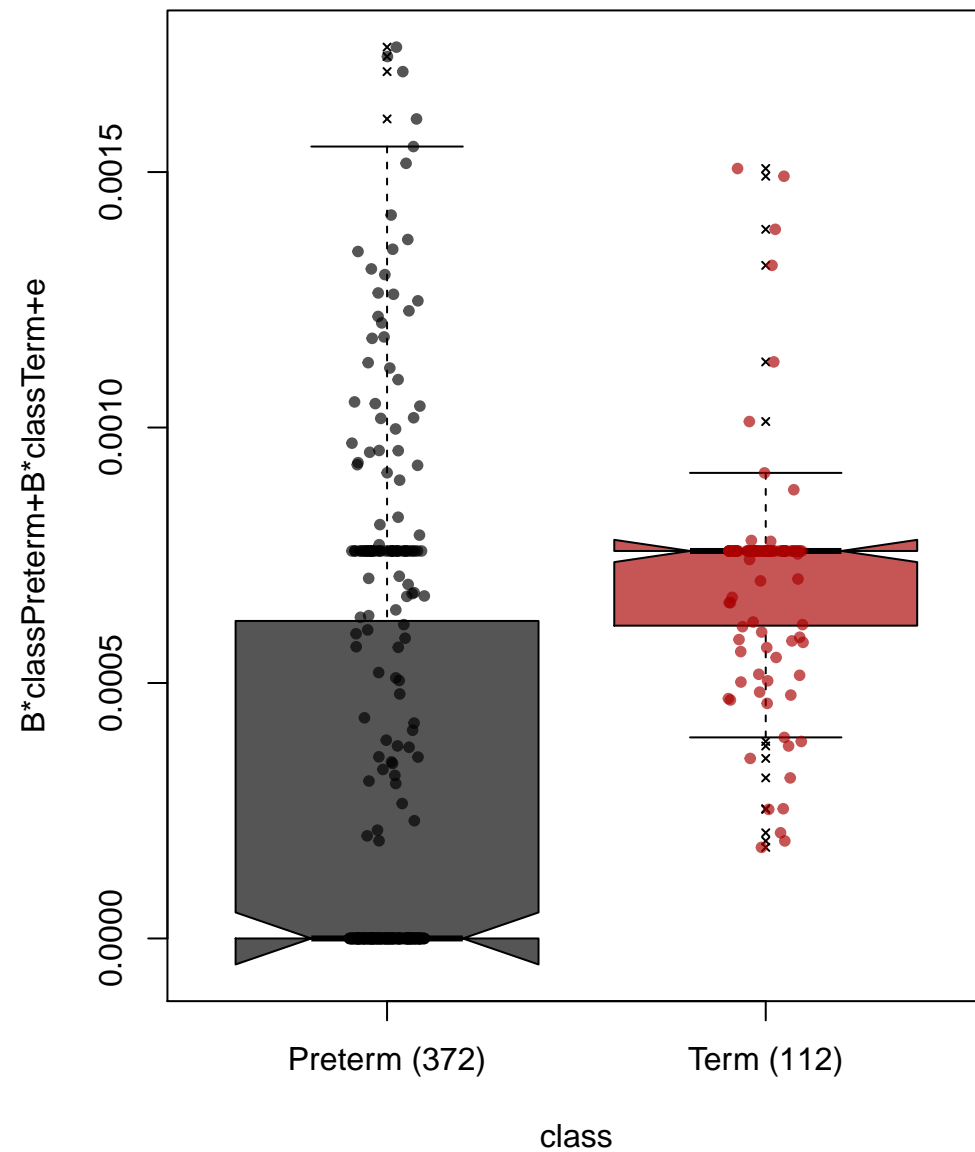

classTerm (0.00875 sd 0.000825, p=9.08e-24, q=6.84e-23)

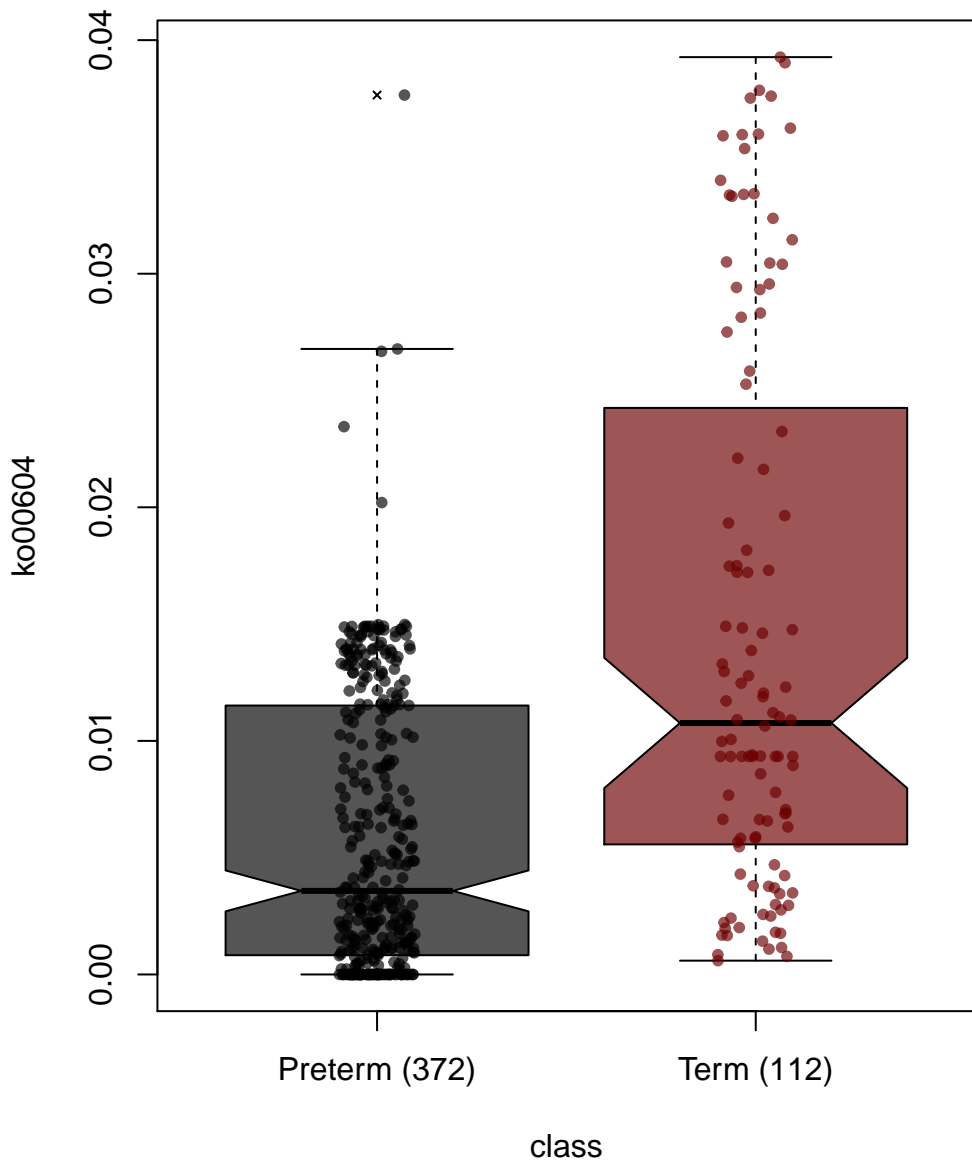

Partial Residual Plot

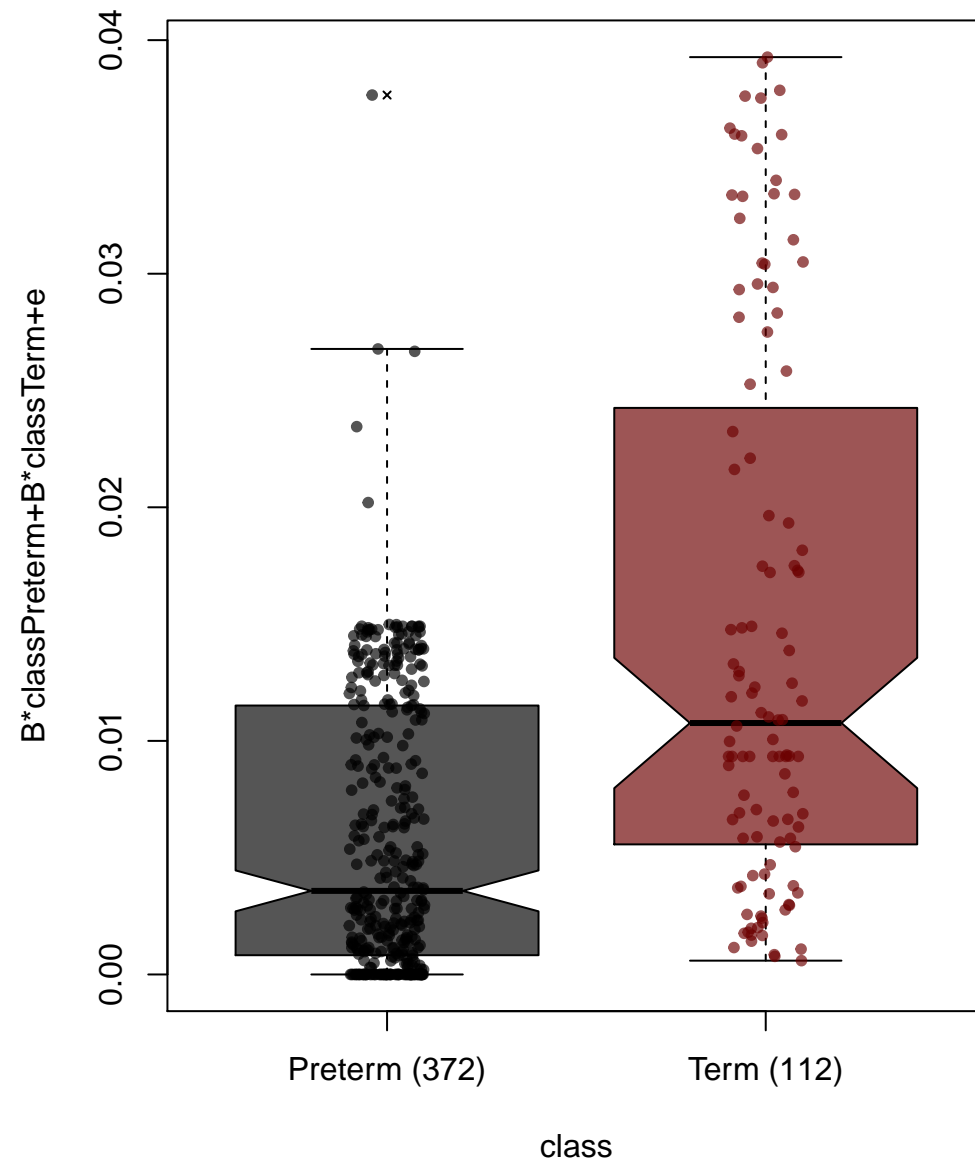

classTerm (0.000485 sd 4.69e-05, p=8.25e-23, q=6.06e-22)

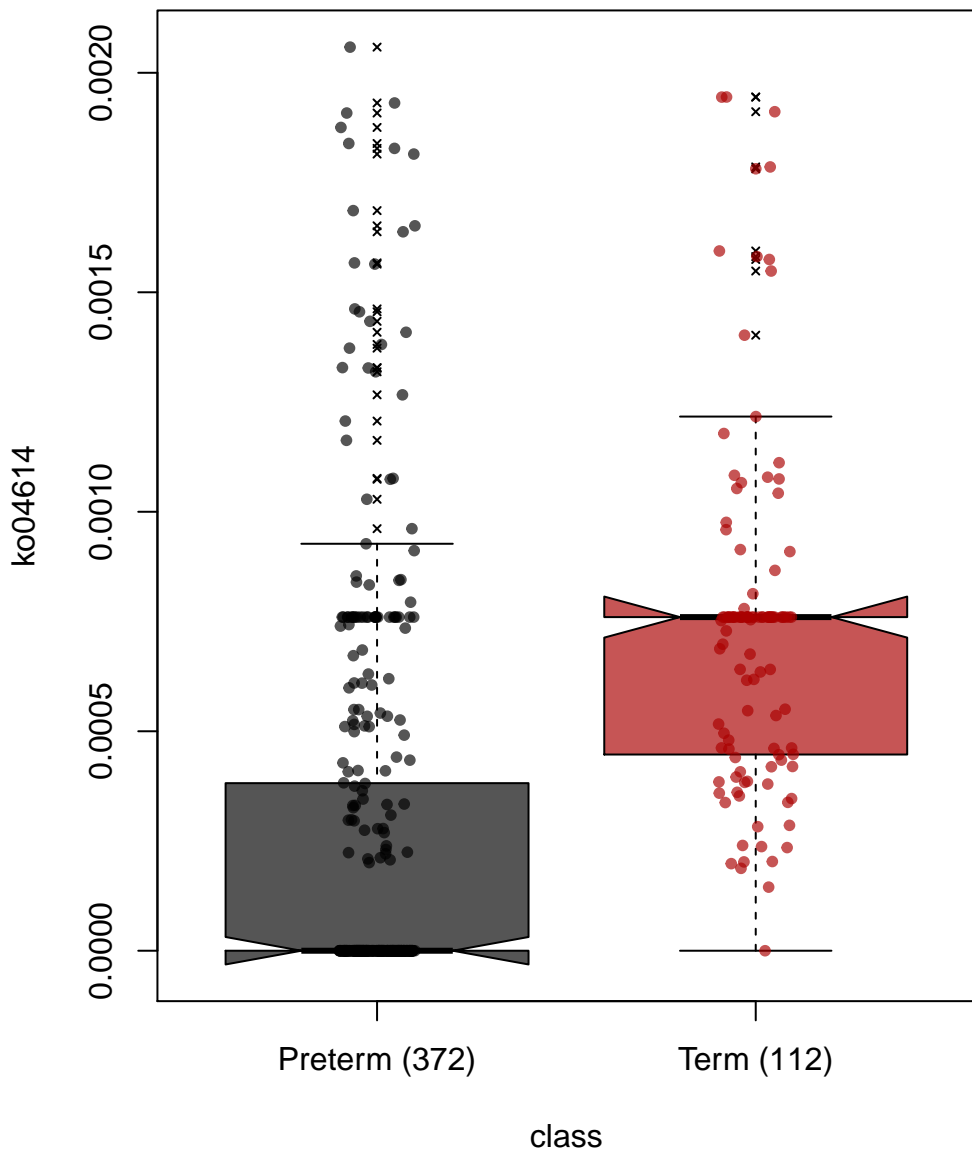

Partial Residual Plot

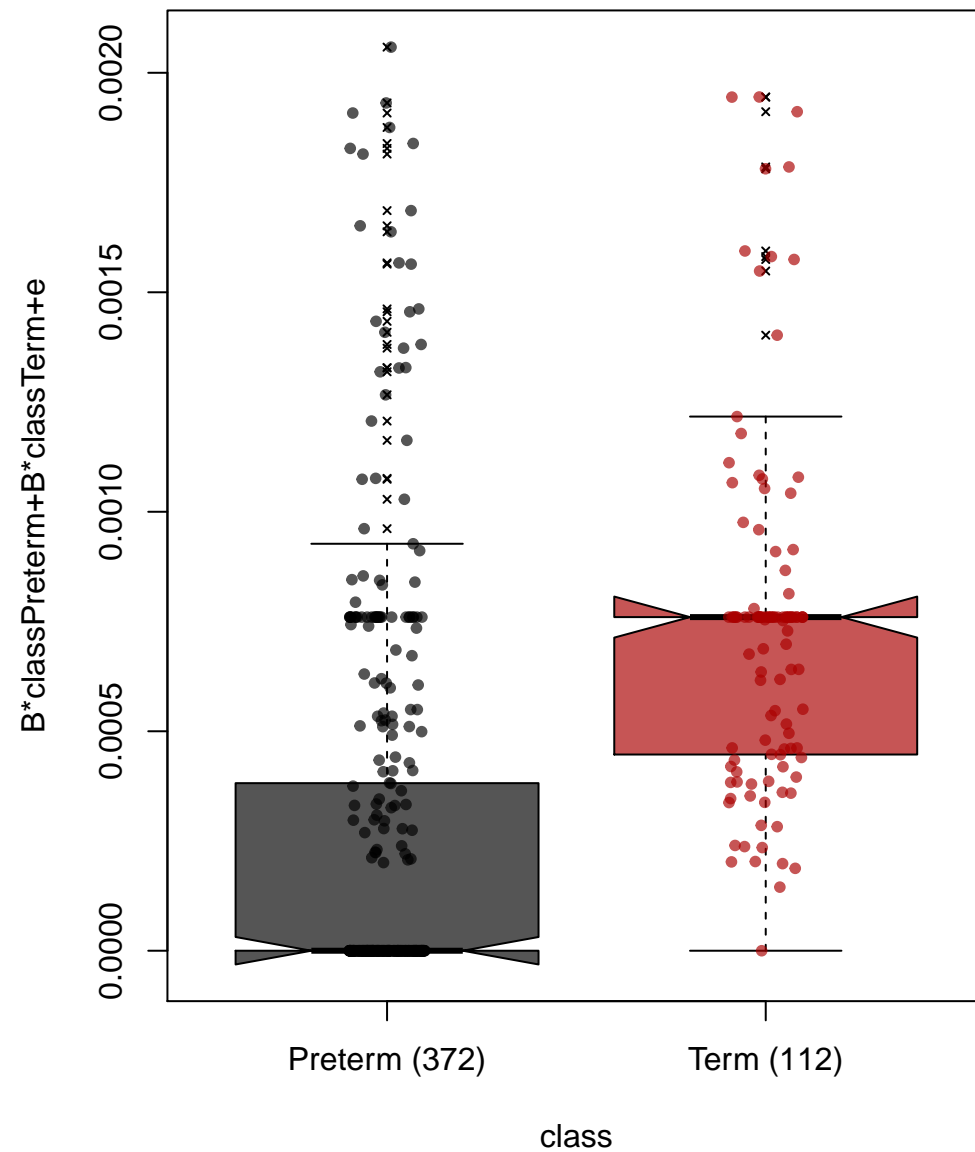

classTerm (−0.00681 sd 0.000676, p=8.63e−22, q=6.18e−21)

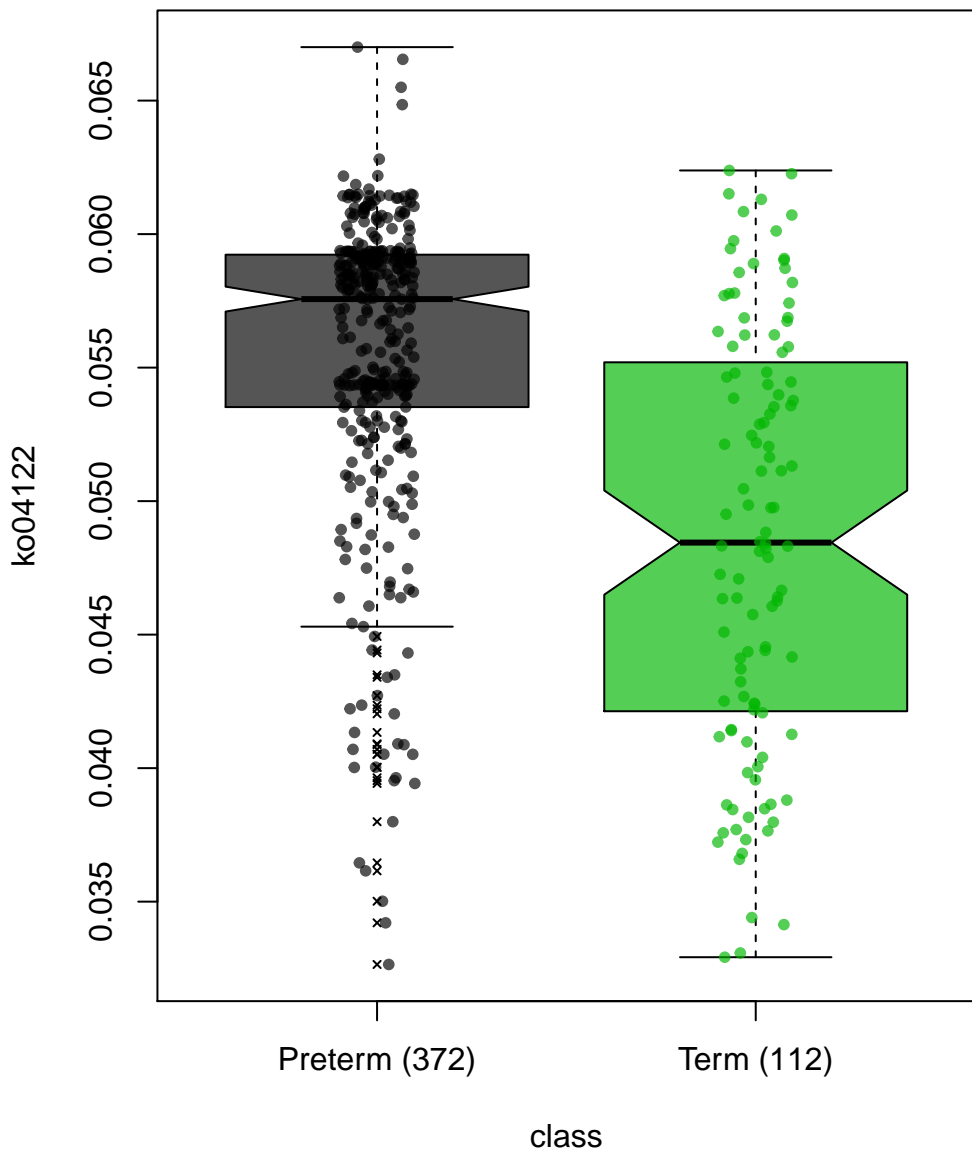

Partial Residual Plot

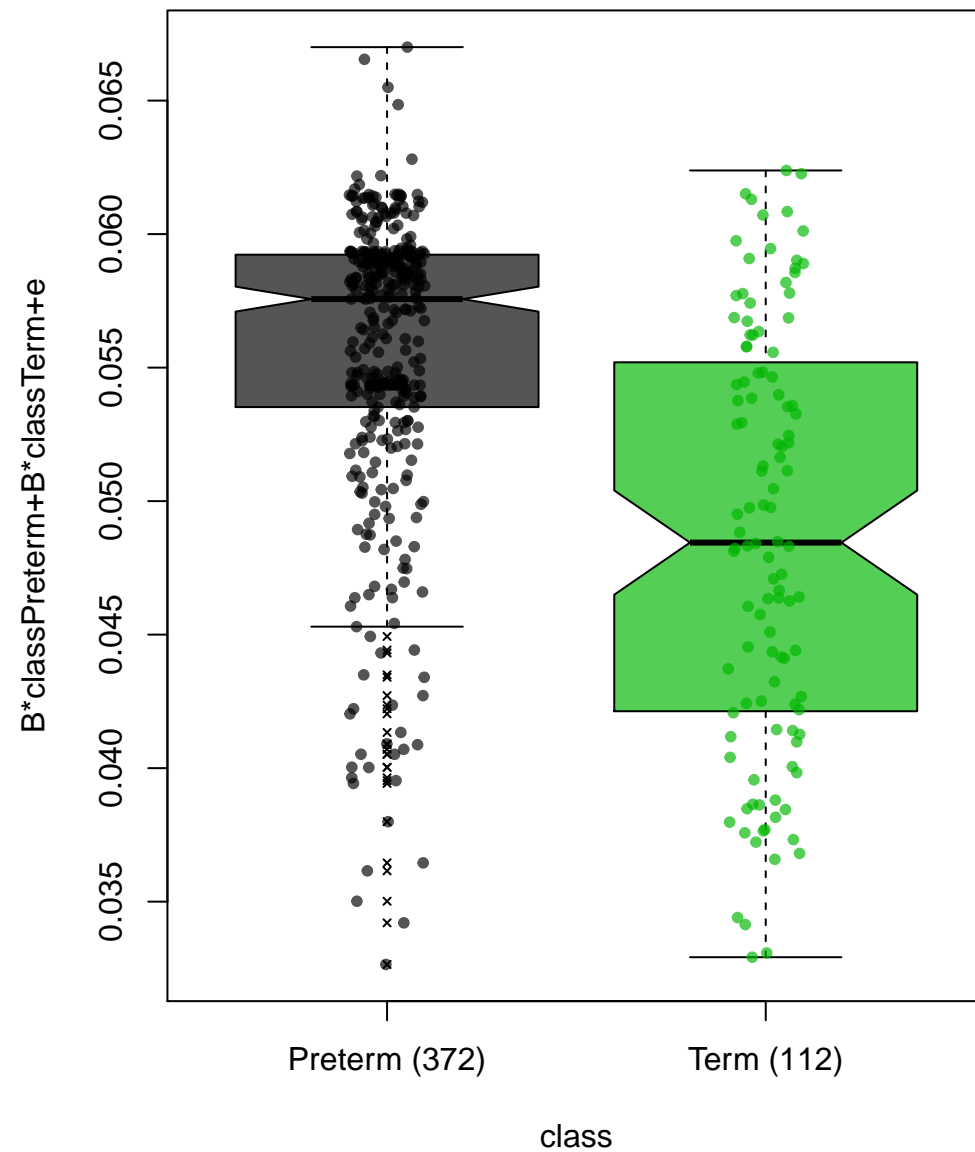

classTerm (−0.00593 sd 0.000589, p=9.01e−22, q=6.28e−21)

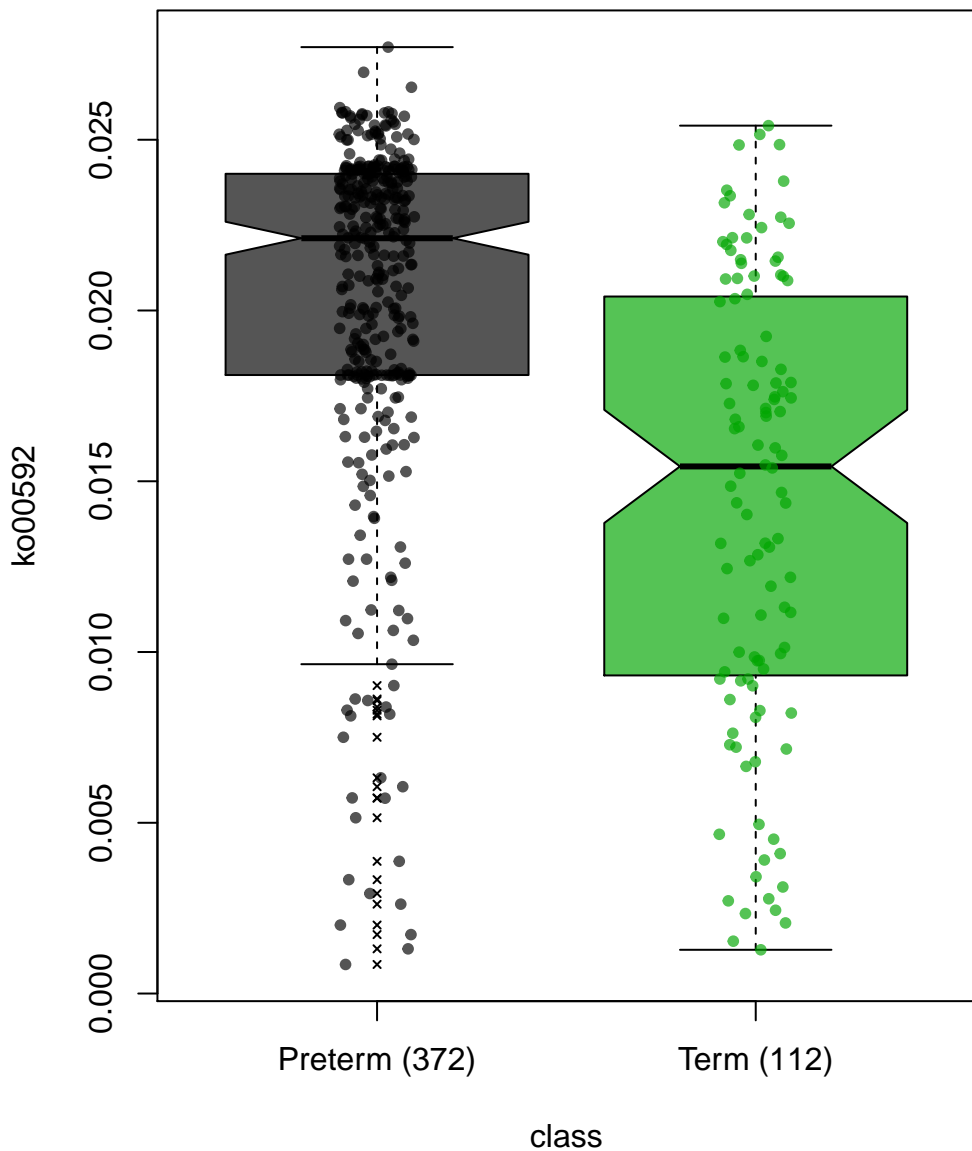

Partial Residual Plot

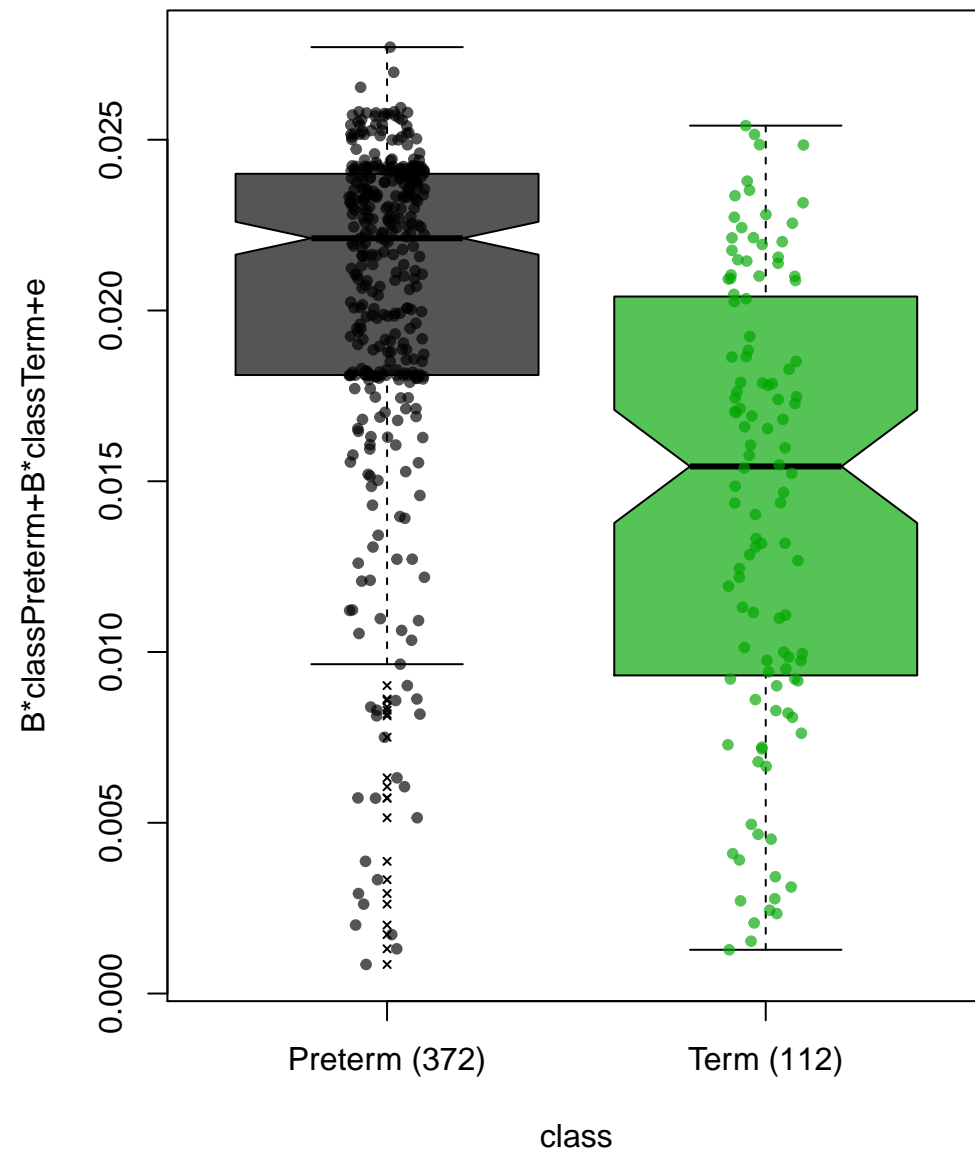

classTerm (−0.00452 sd 0.000449, p=9.56e−22, q=6.51e−21)

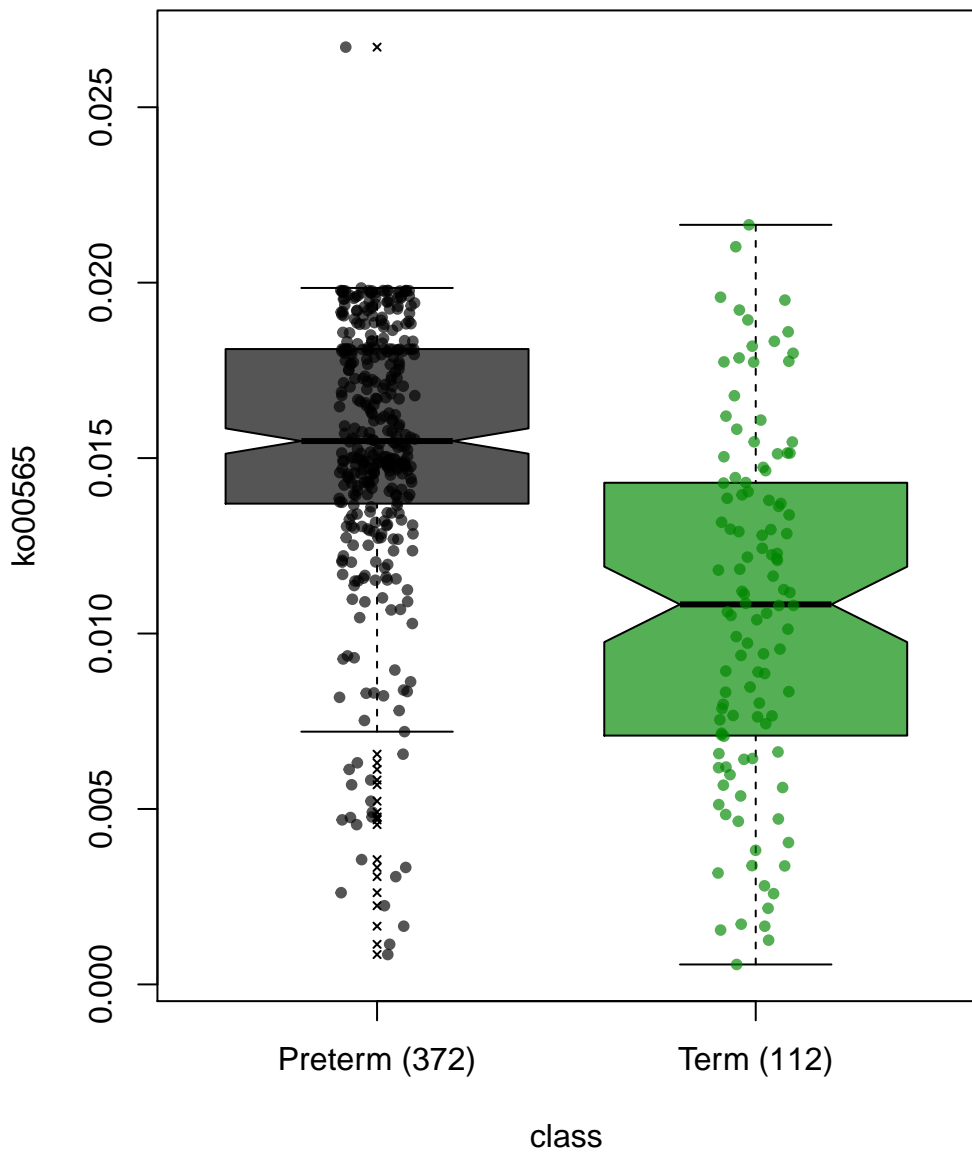

Partial Residual Plot

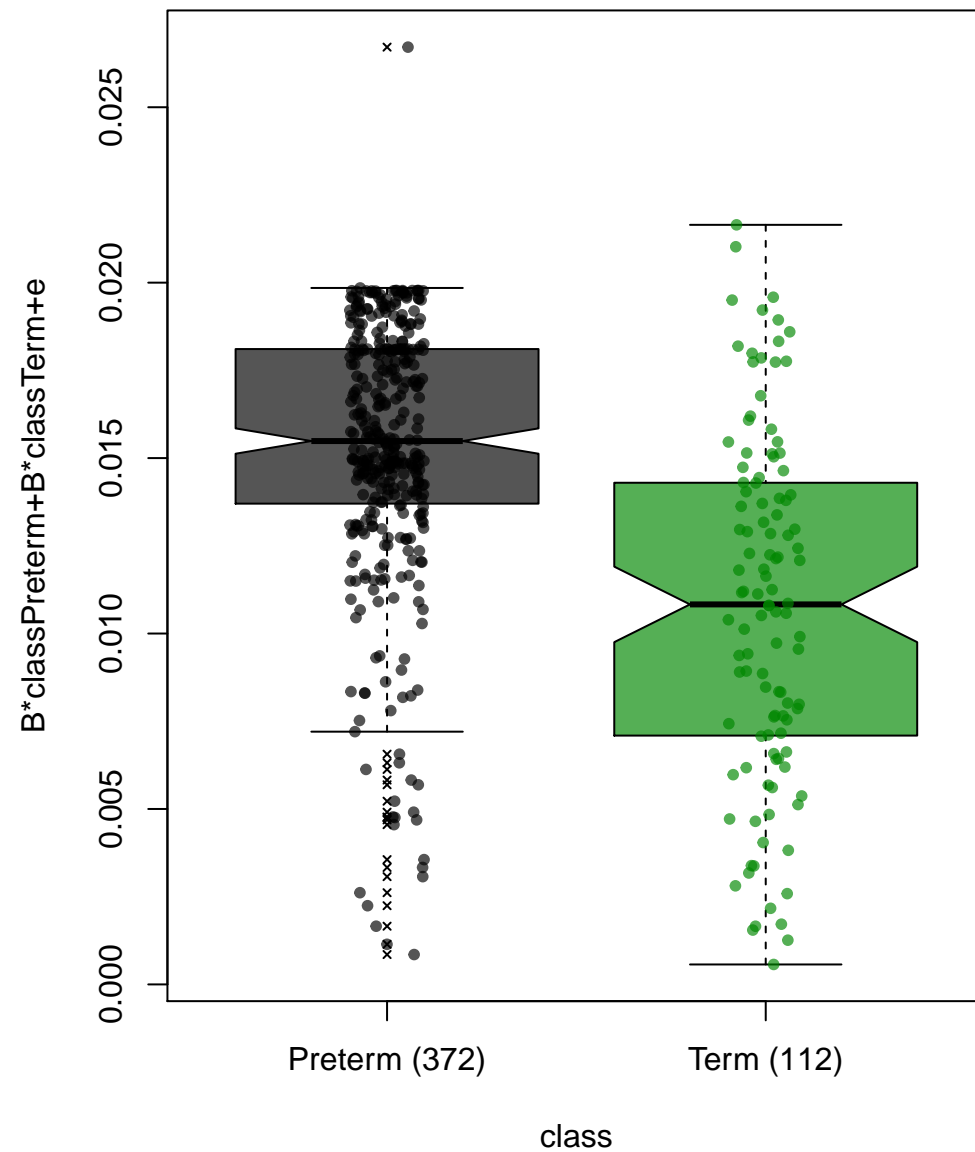

classTerm (0.00719 sd 0.000716, p=1.15e-21, q=7.62e-21)

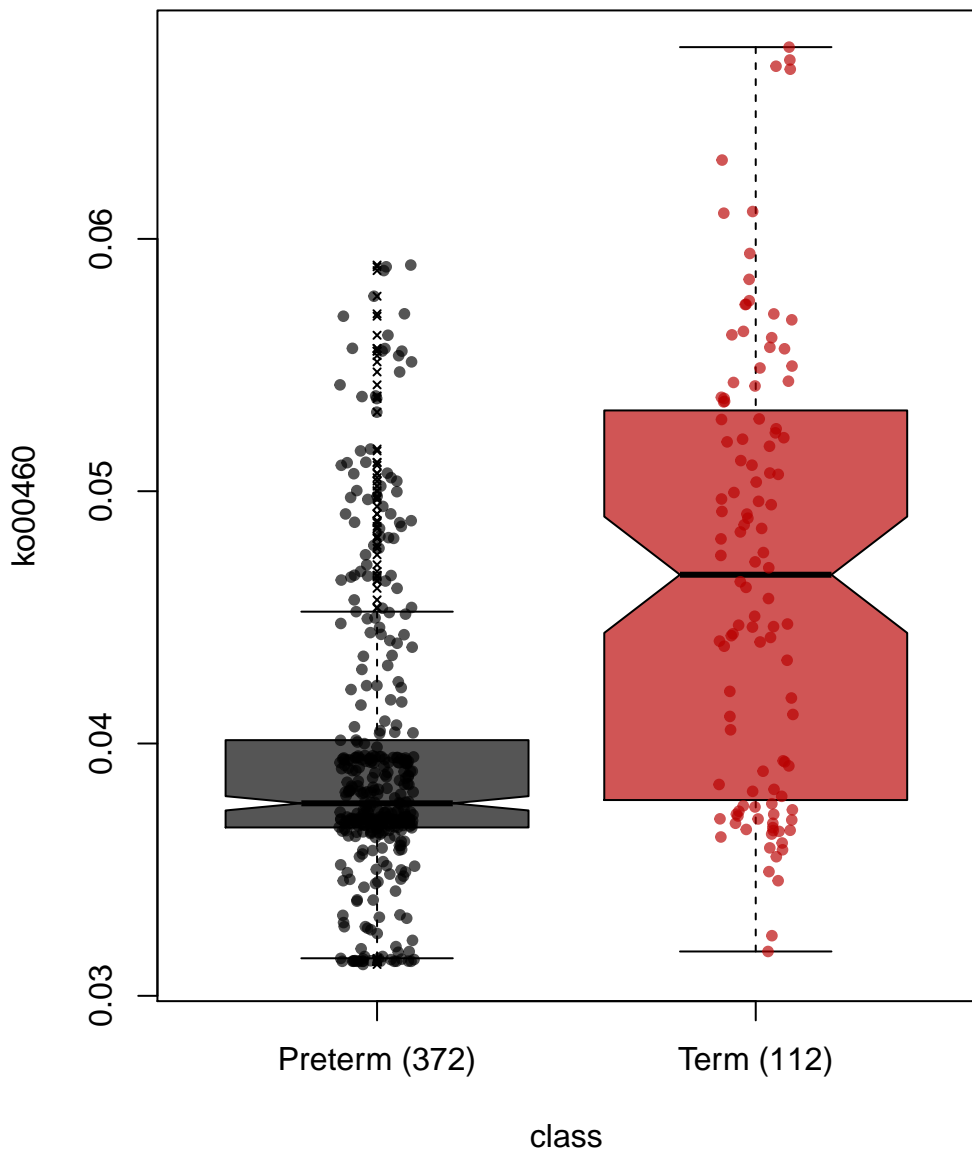

Partial Residual Plot

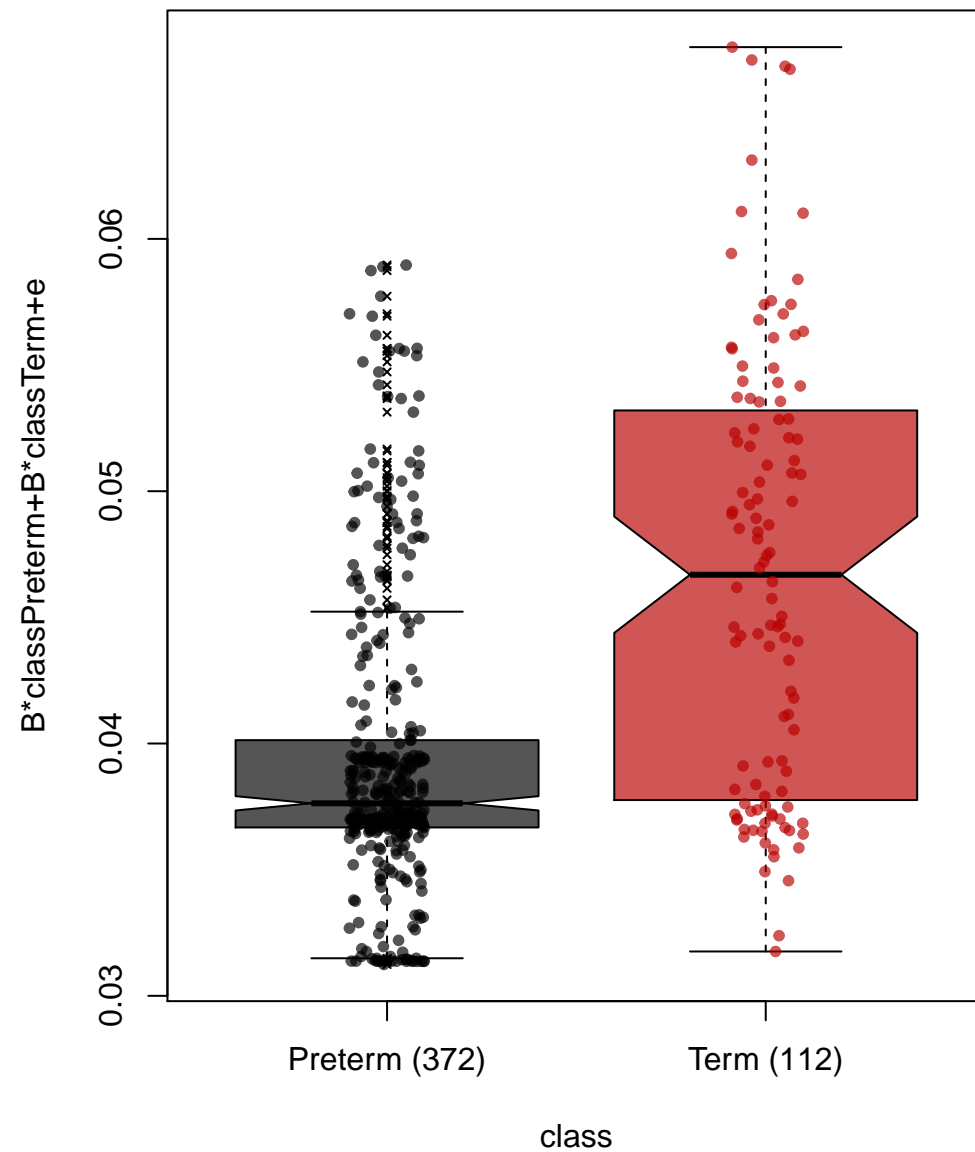

classTerm ( $-0.0271$  sd  $0.00278$ ,  $p=1.53e-20$ ,  $q=9.94e-20$ )

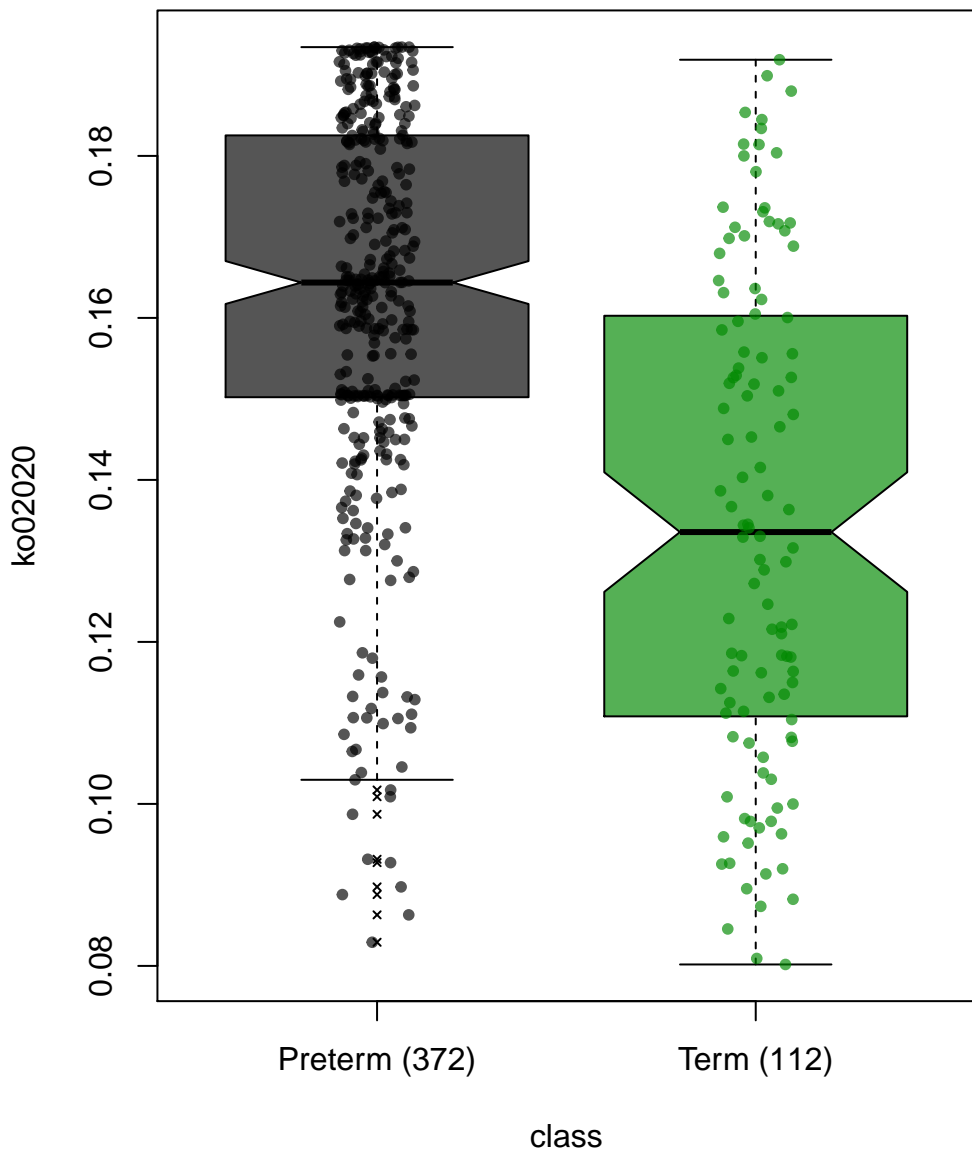

Partial Residual Plot

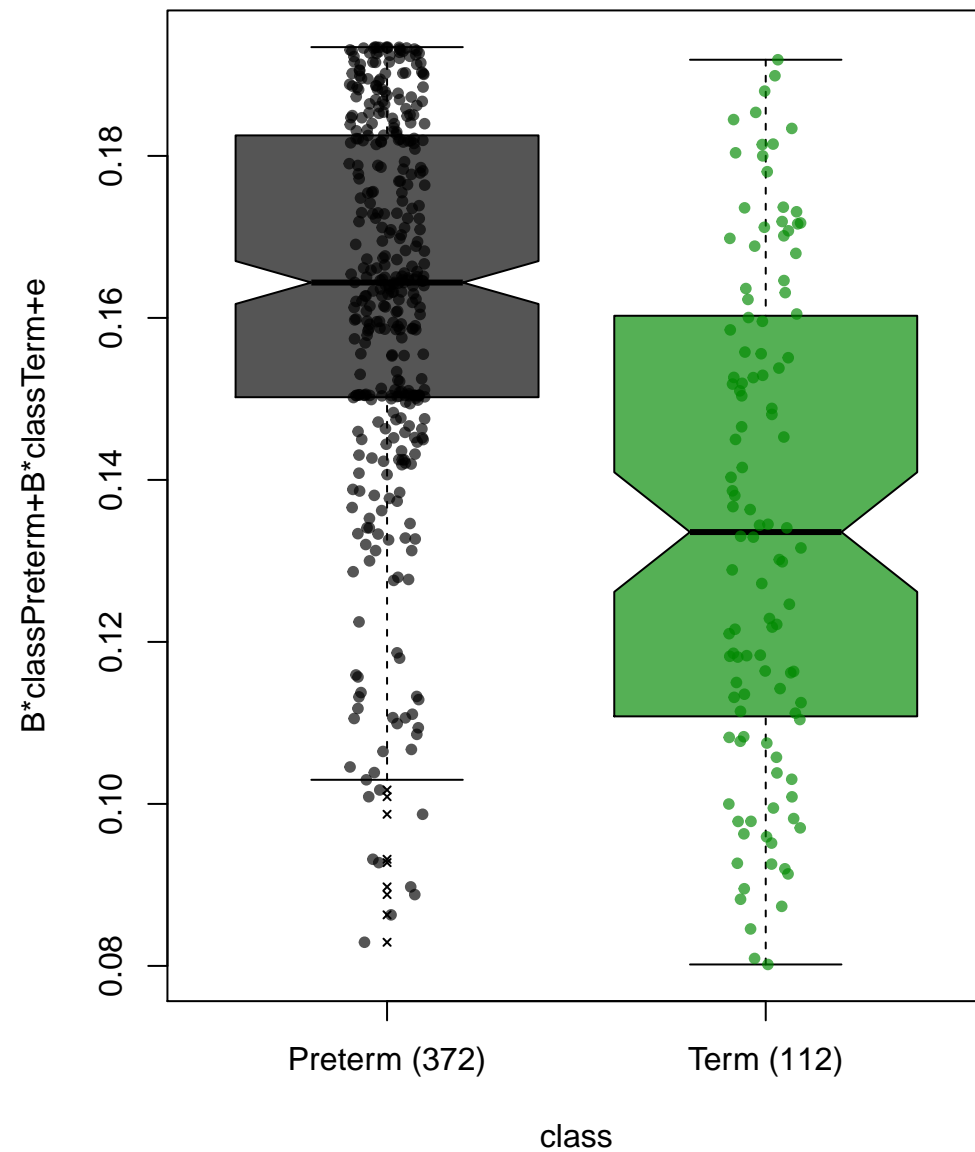



classTerm (0.000448 sd 4.63e-05, p=2.03e-20, q=1.29e-19)

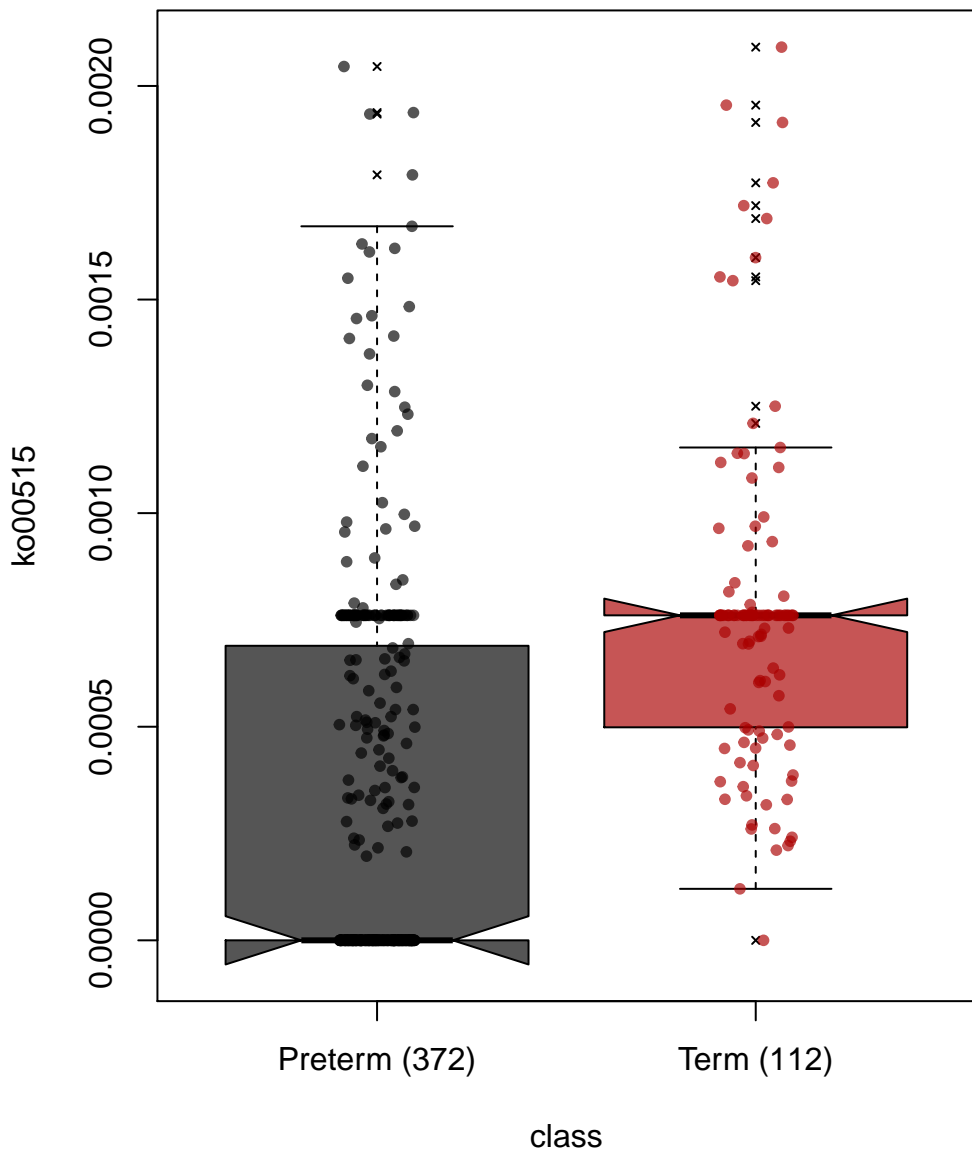

Partial Residual Plot

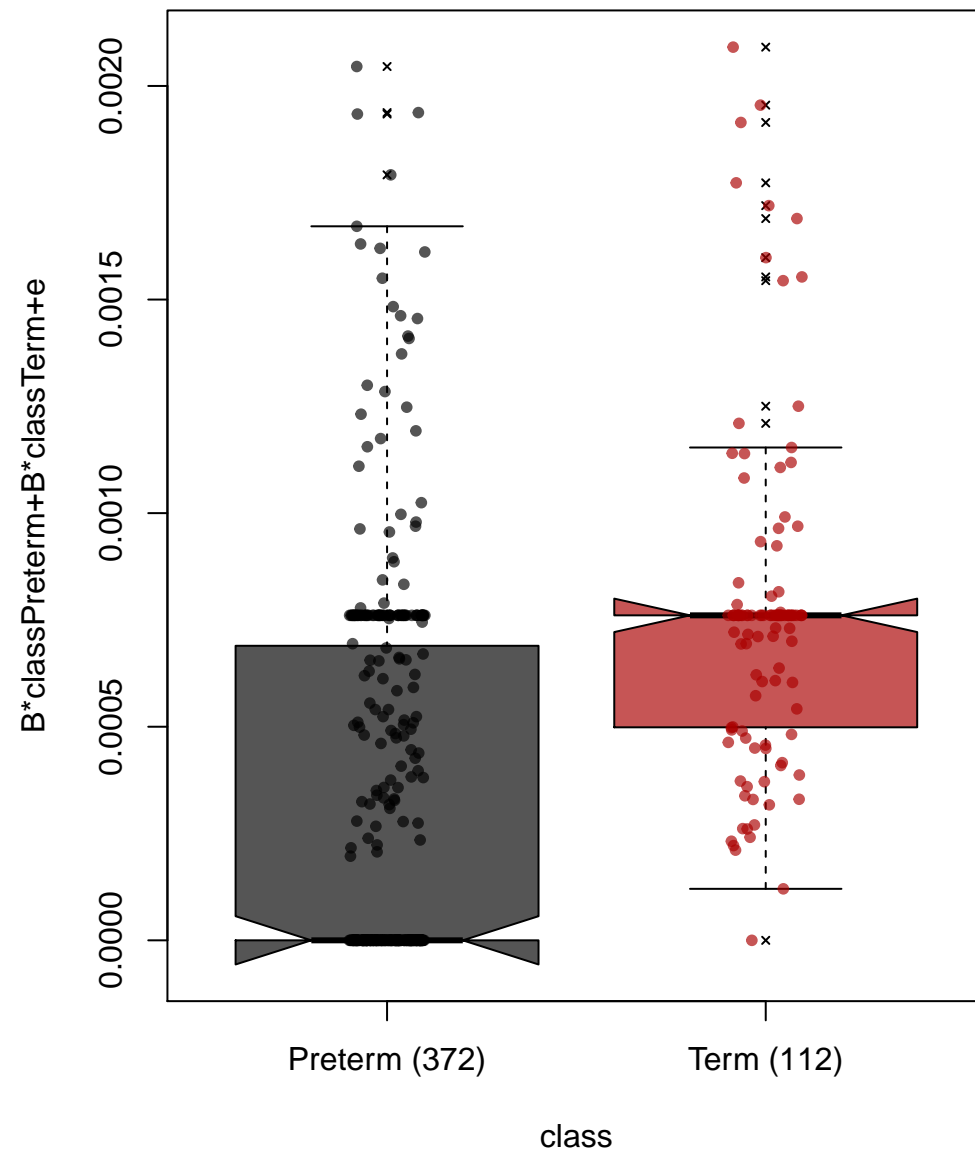

classTerm (0.00408 sd 0.000426, p=5.51e-20, q=3.42e-19)

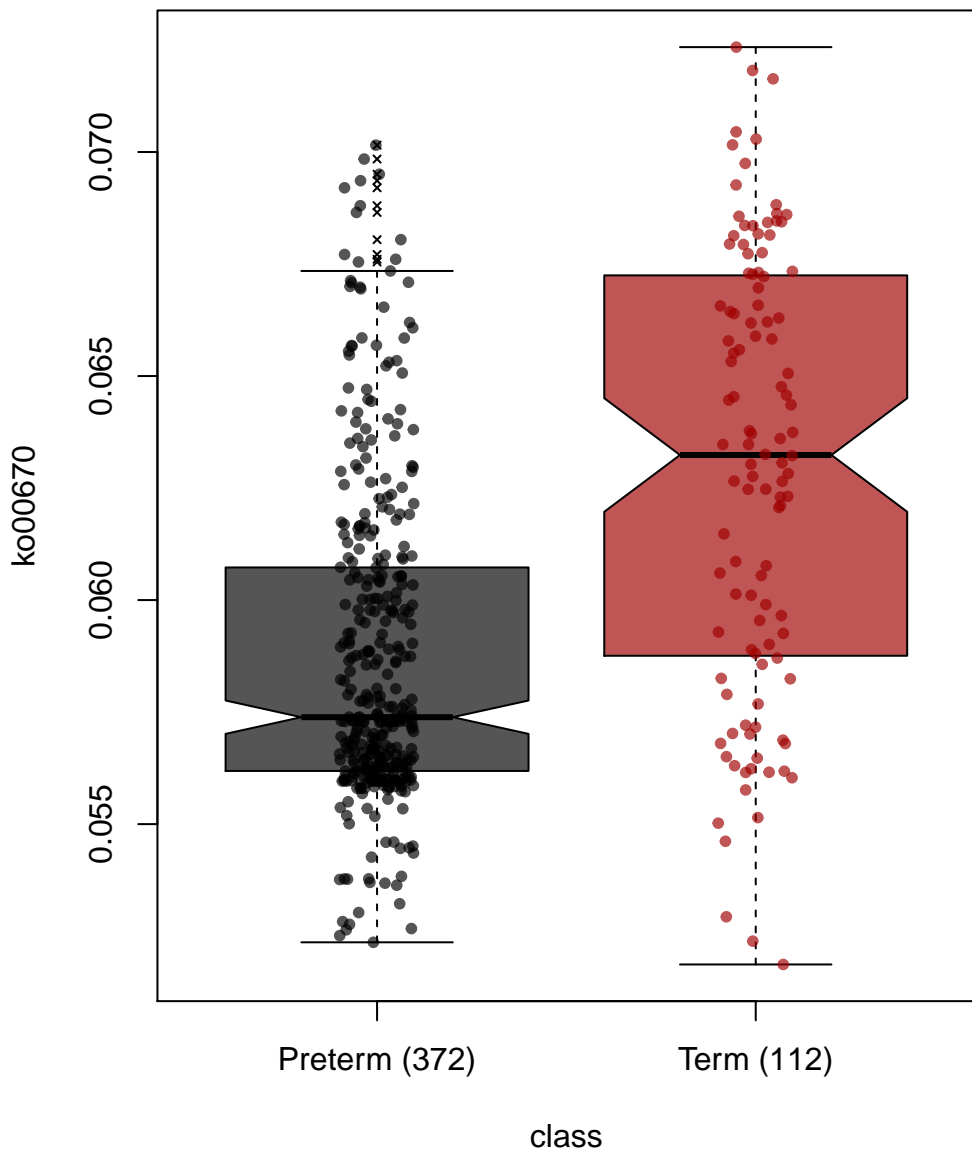

Partial Residual Plot

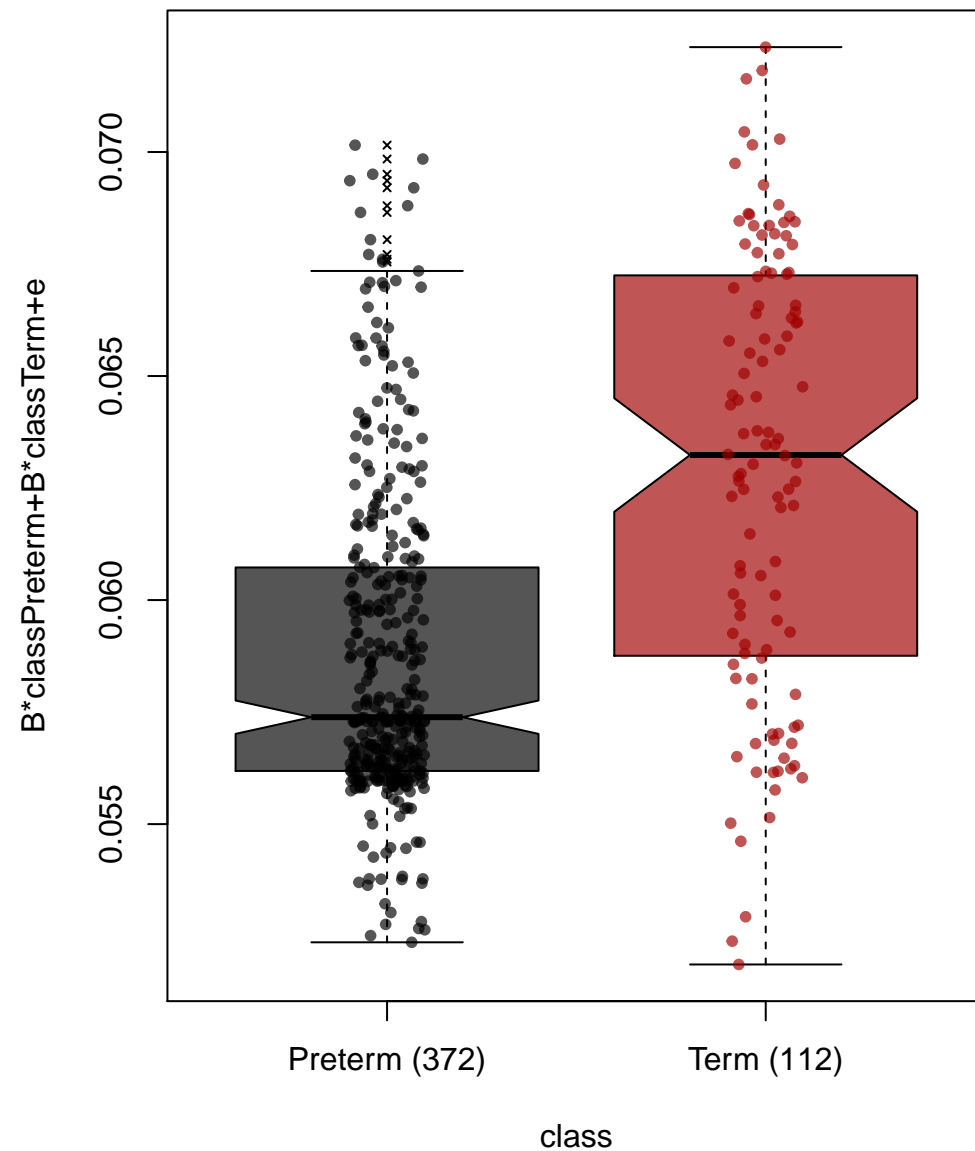

classTerm (0.00247 sd 0.000261, p=1.22e-19, q=7.4e-19)

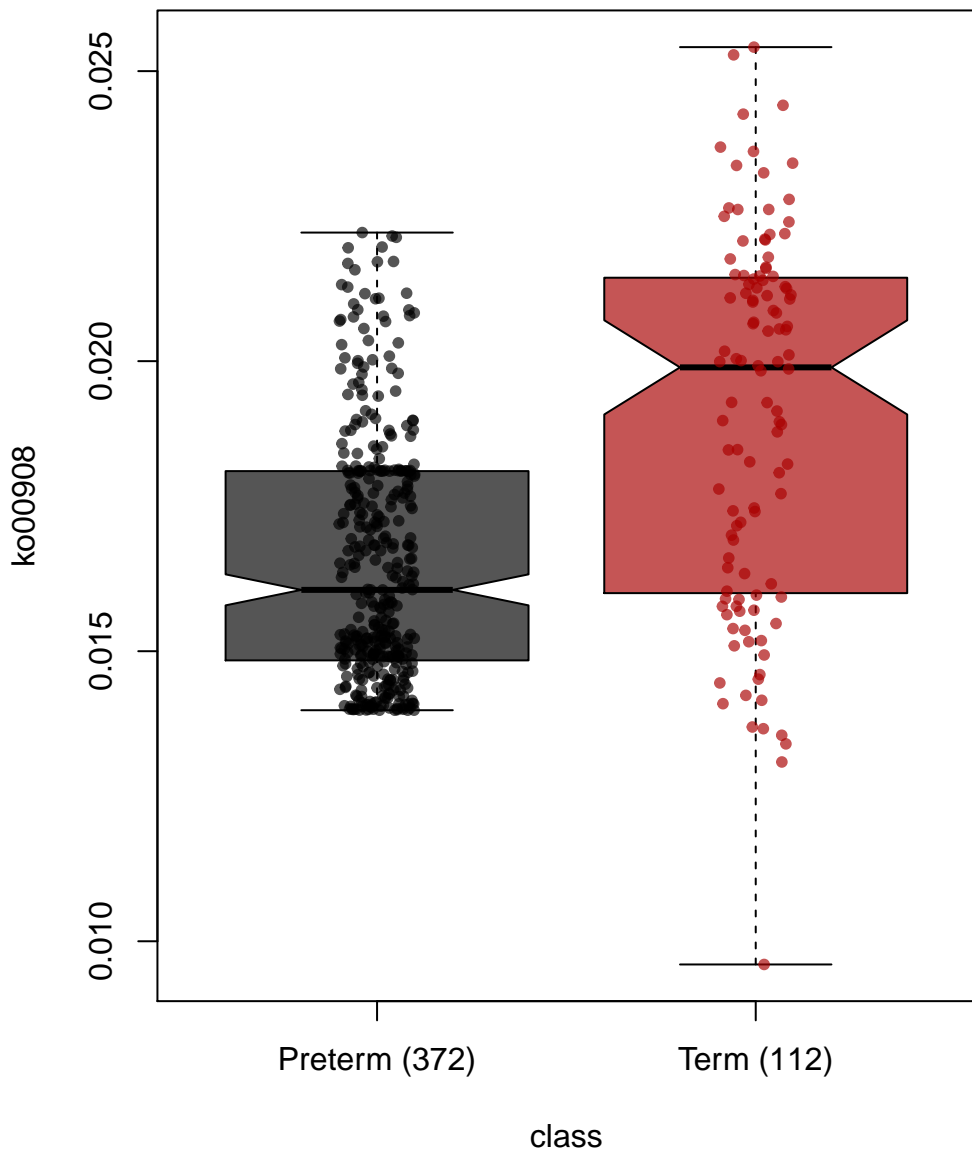

Partial Residual Plot

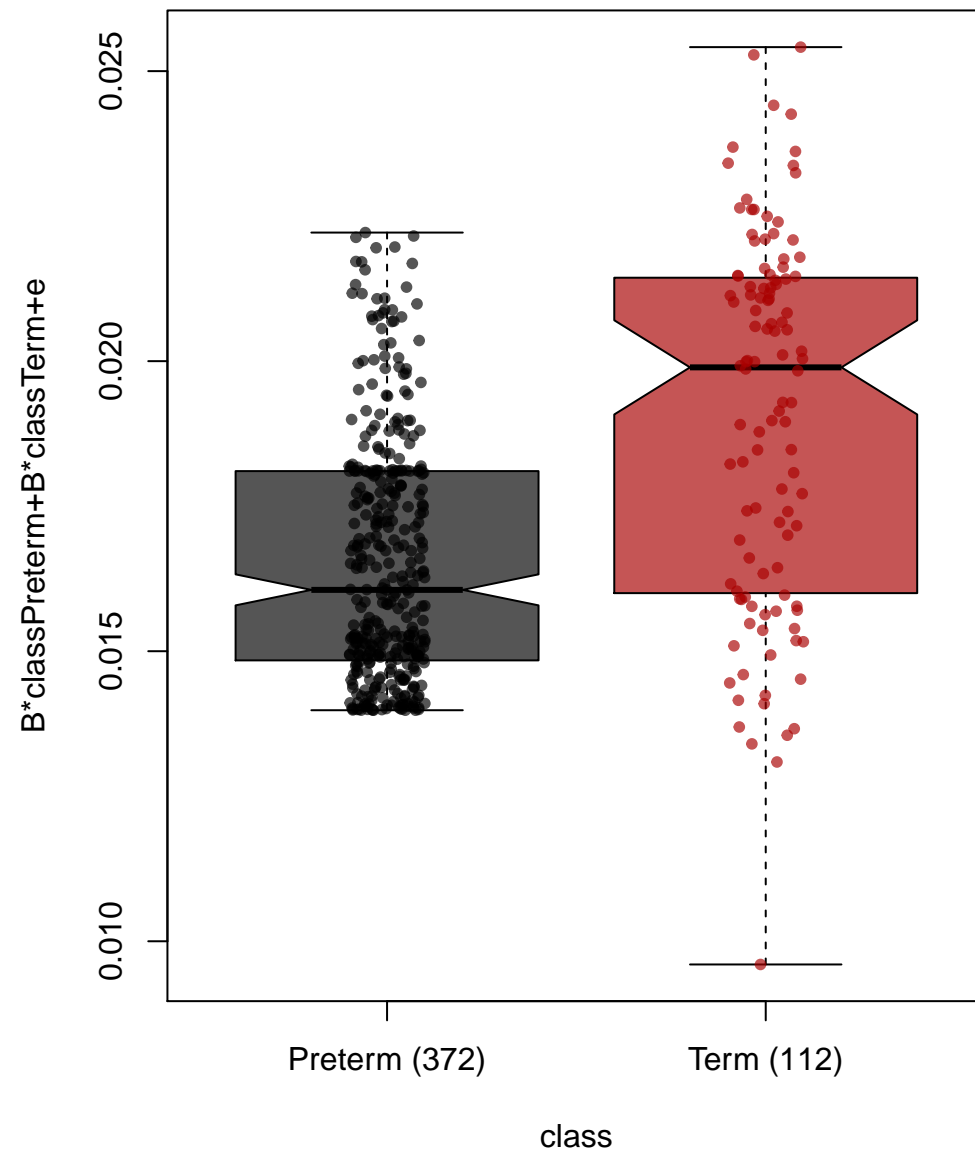

classTerm (0.00632 sd 0.000671, p=1.89e-19, q=1.12e-18)

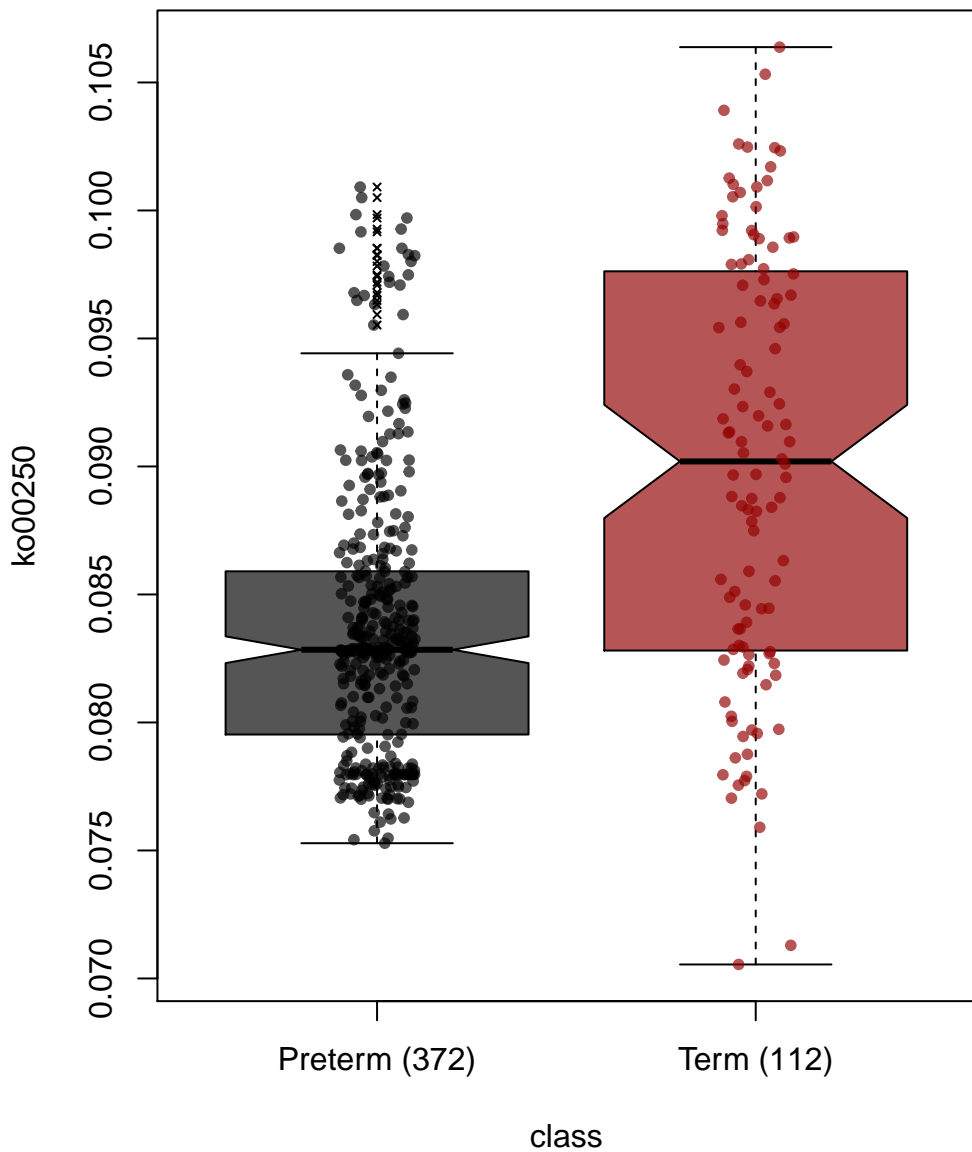

Partial Residual Plot

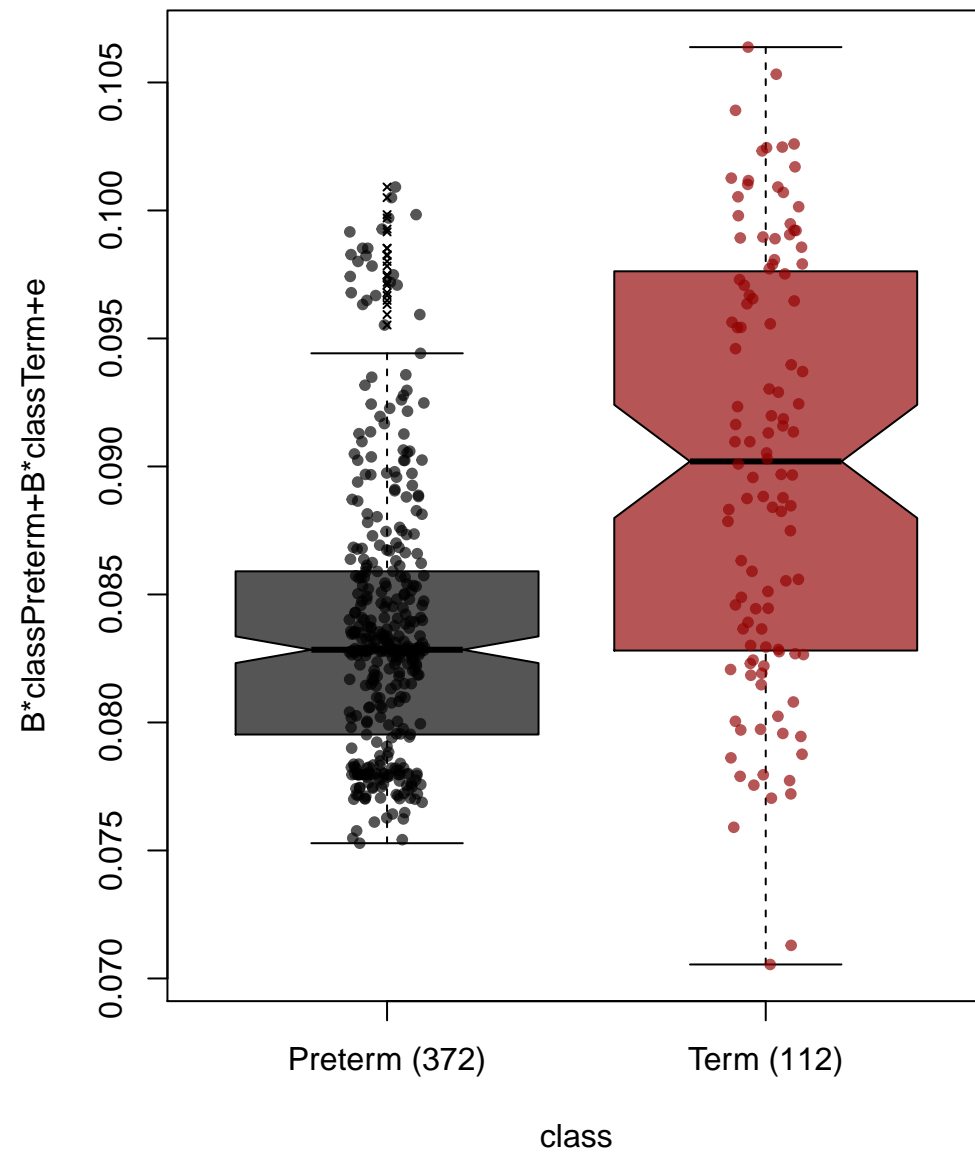

classTerm (0.00535 sd 0.000569, p=2.28e-19, q=1.3e-18)

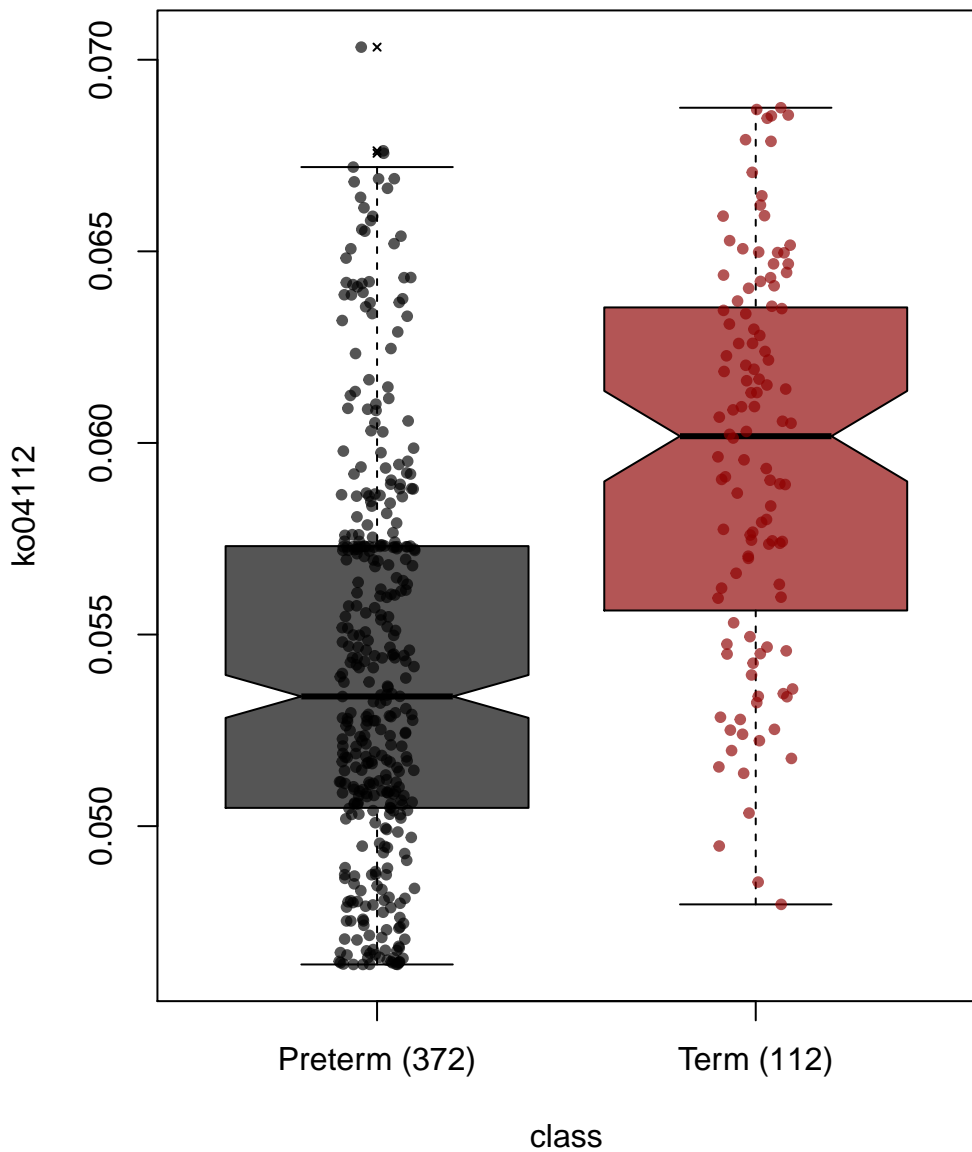

Partial Residual Plot

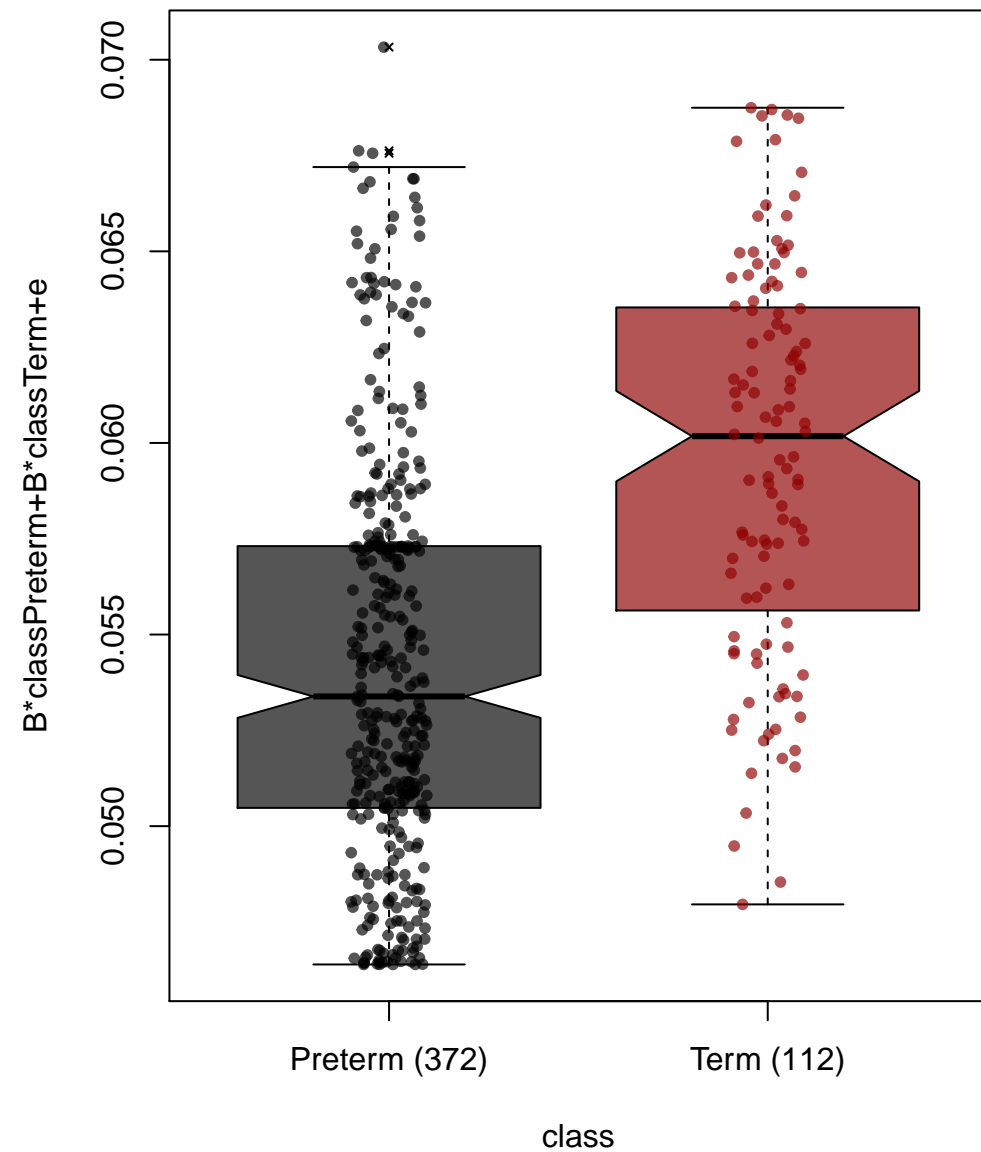

classTerm (0.00401 sd 0.000426, p=2.28e-19, q=1.3e-18)

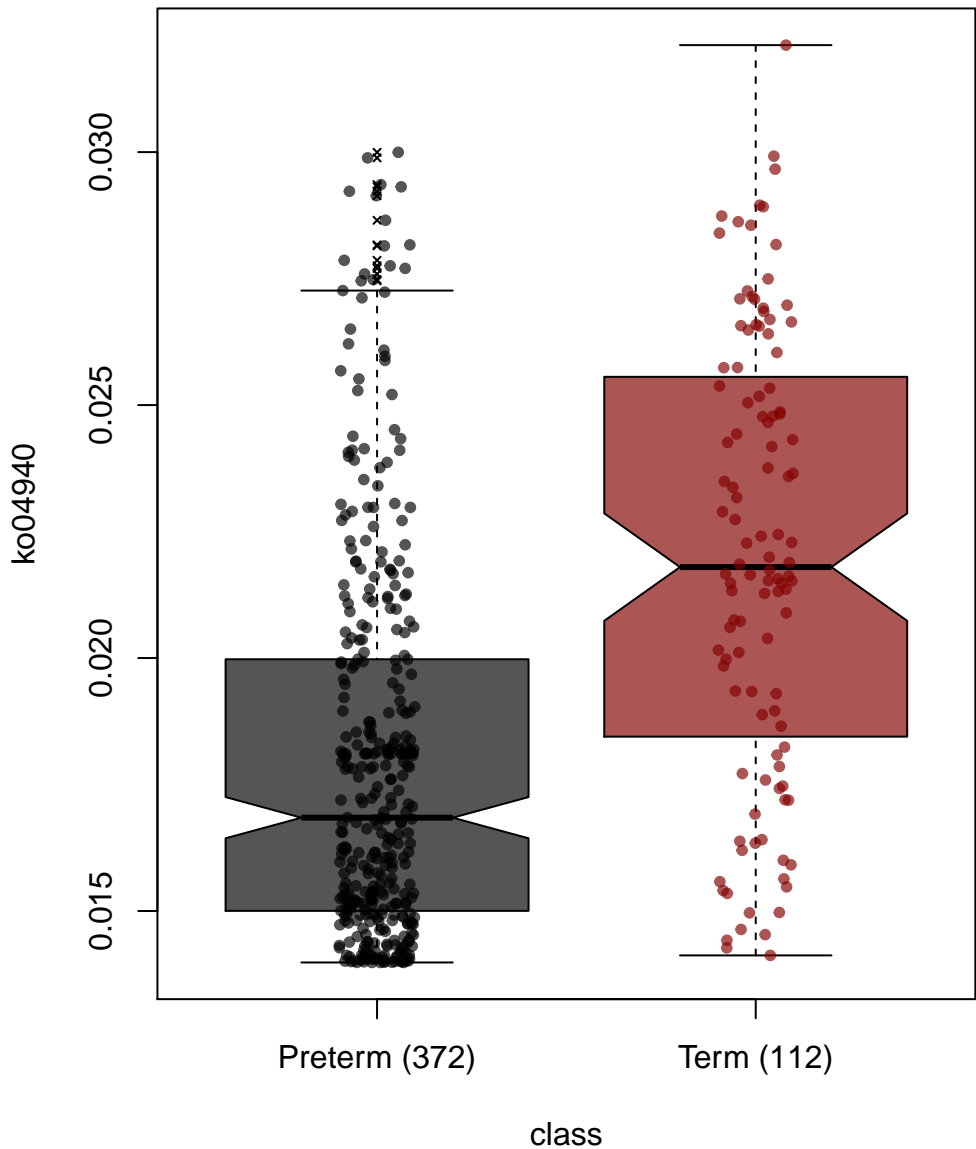

Partial Residual Plot

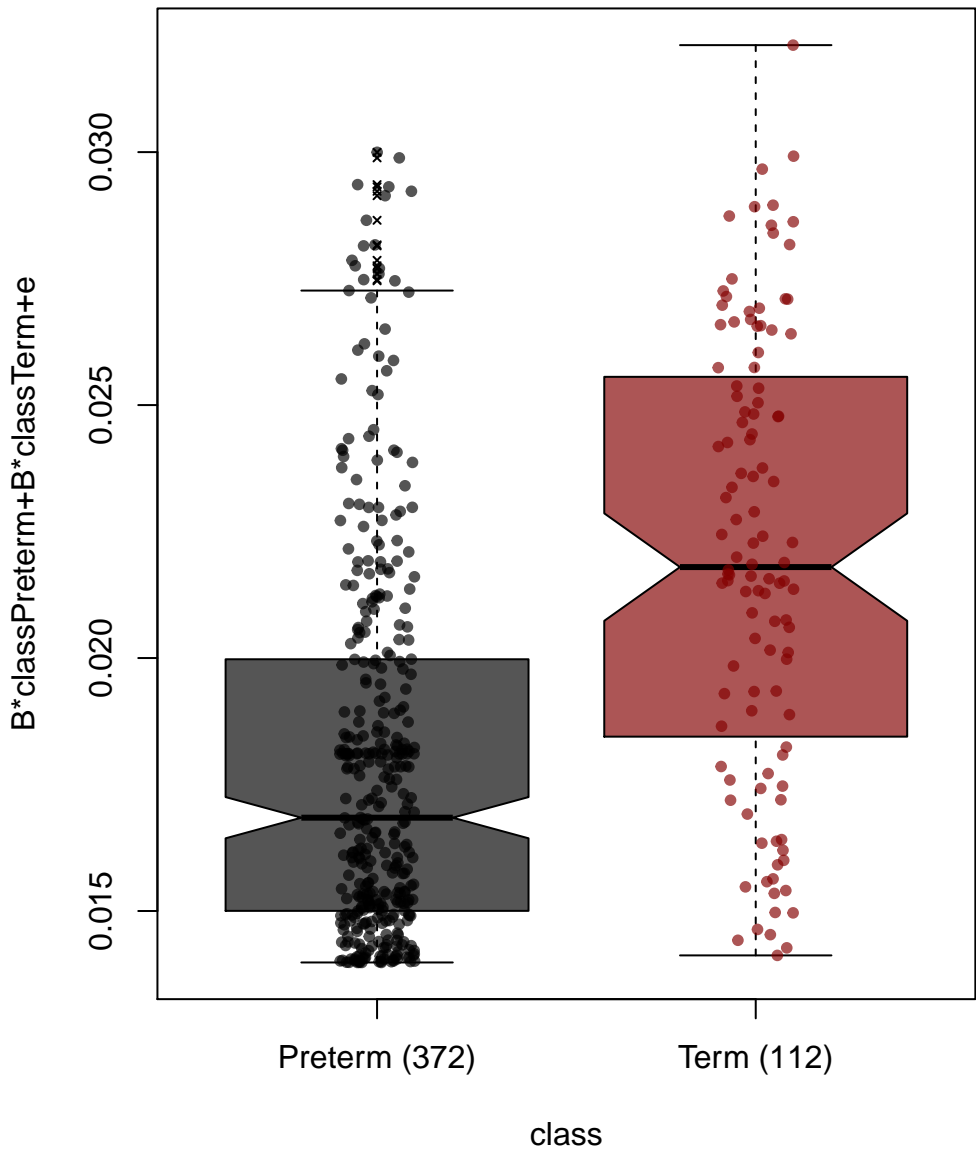

classTerm (0.0042 sd 0.000451, p=4.84e-19, q=2.7e-18)

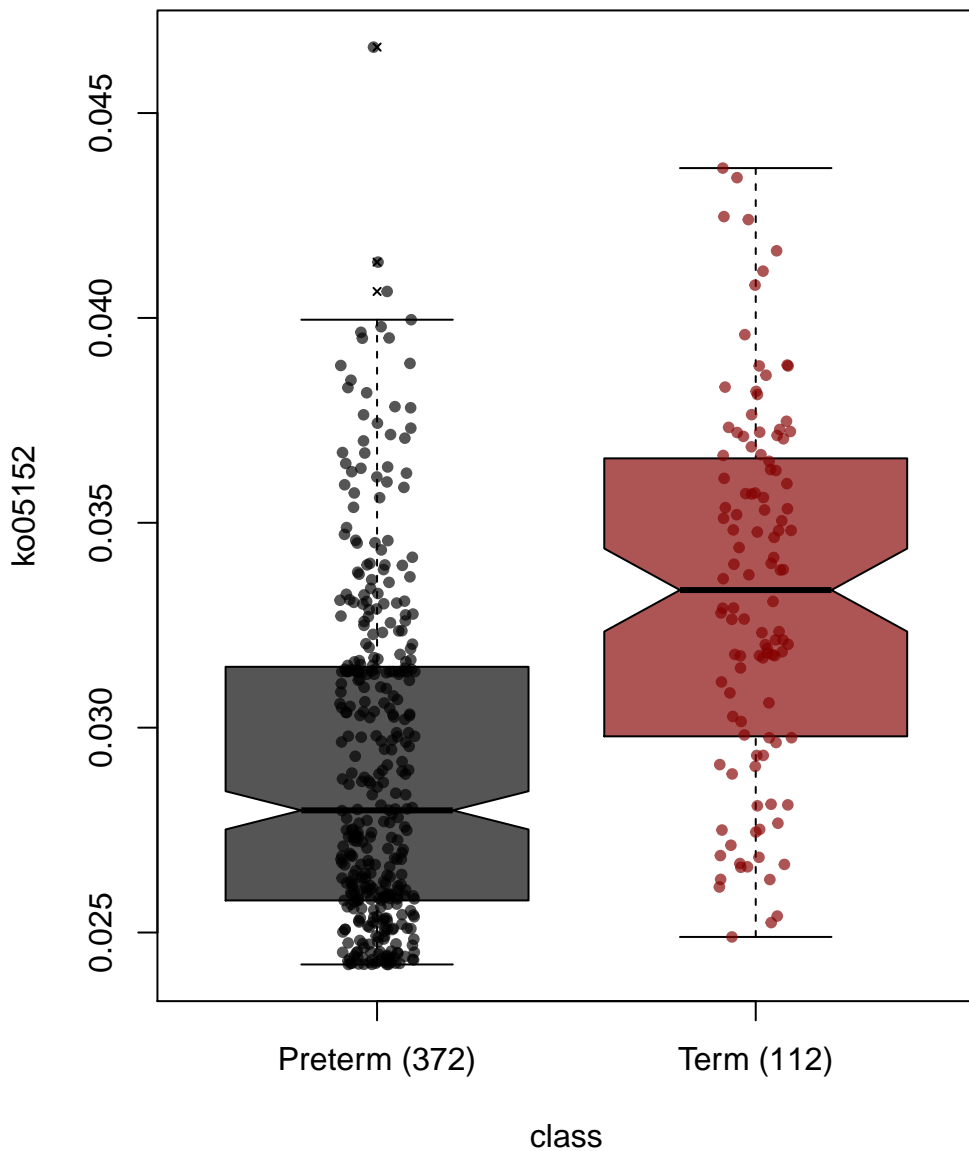

Partial Residual Plot

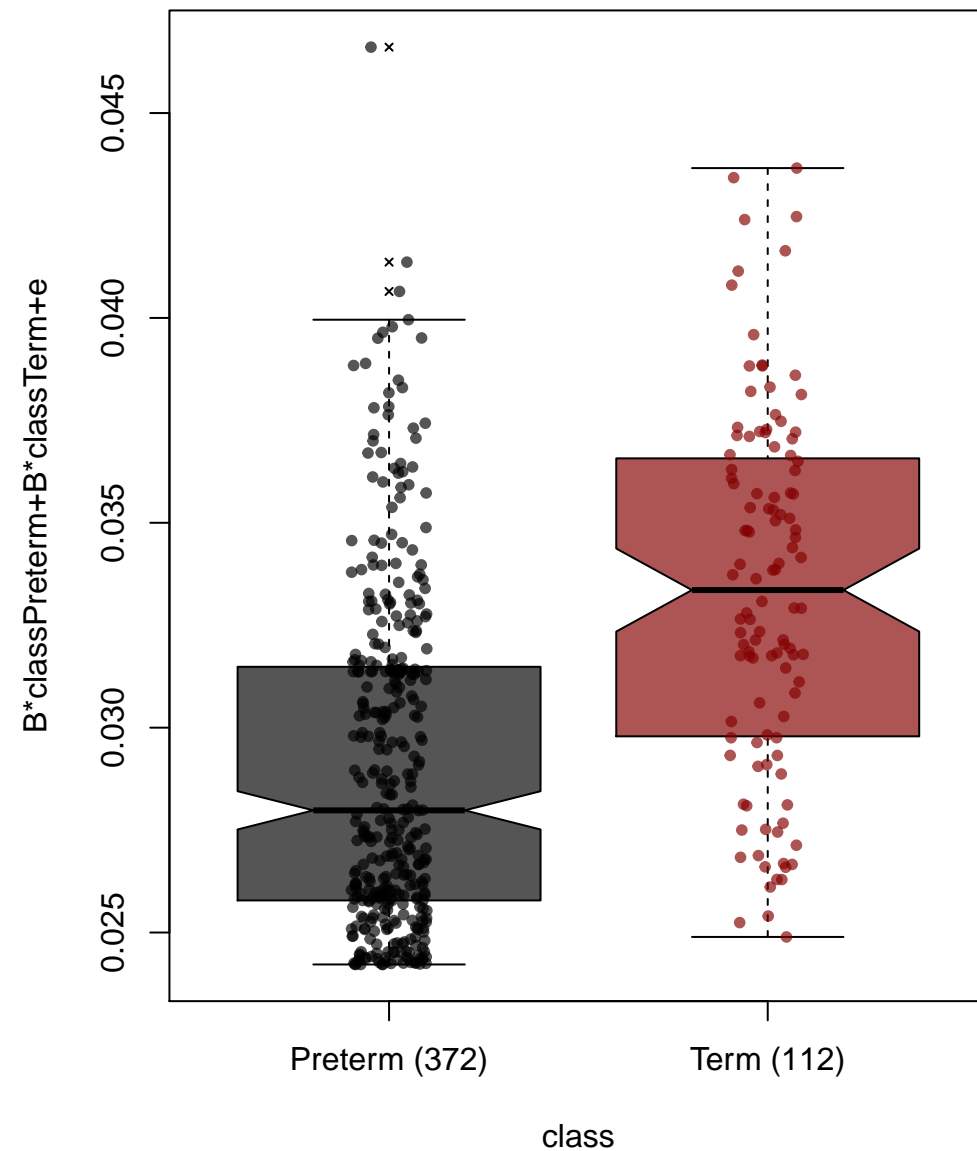

classTerm (0.00521 sd 0.000564, p=8.72e-19, q=4.77e-18)

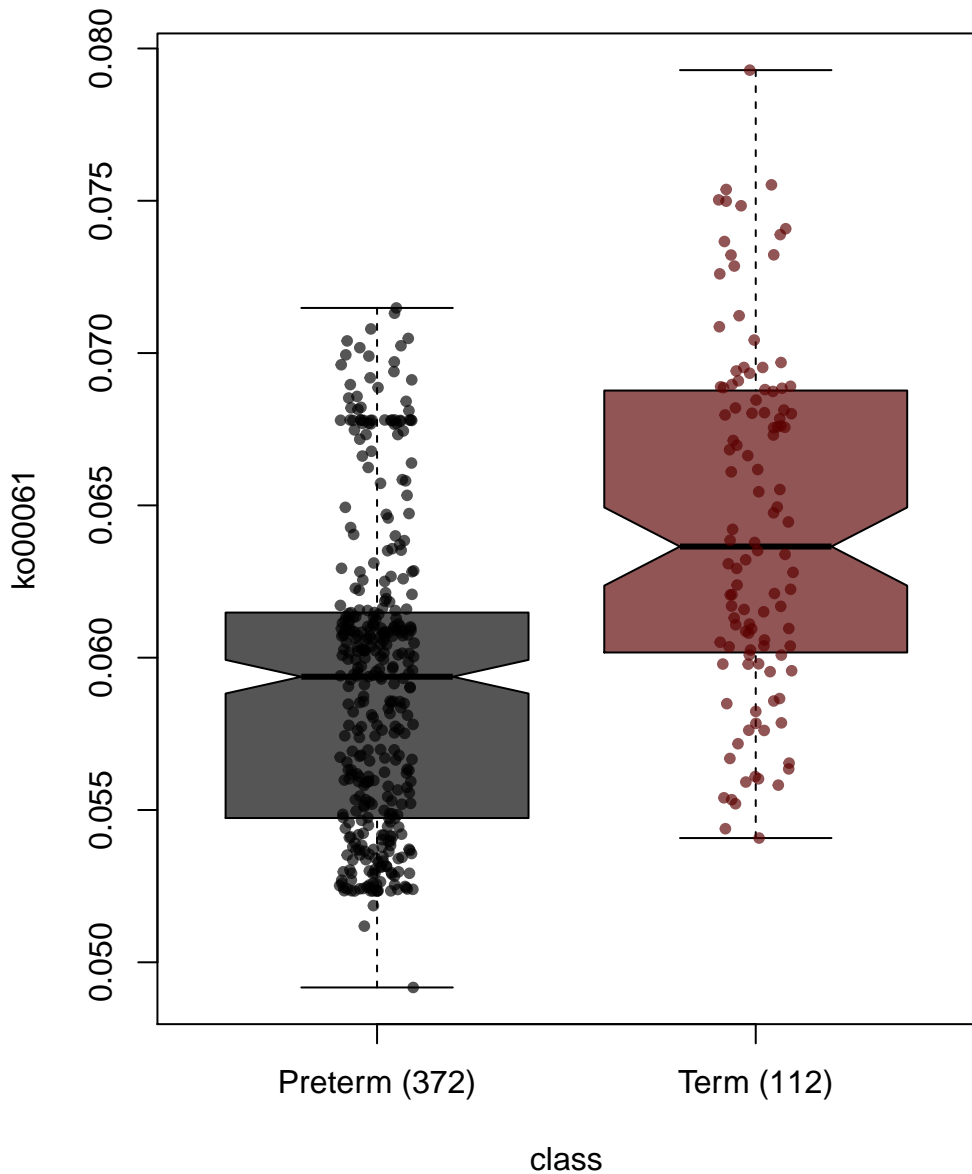

Partial Residual Plot

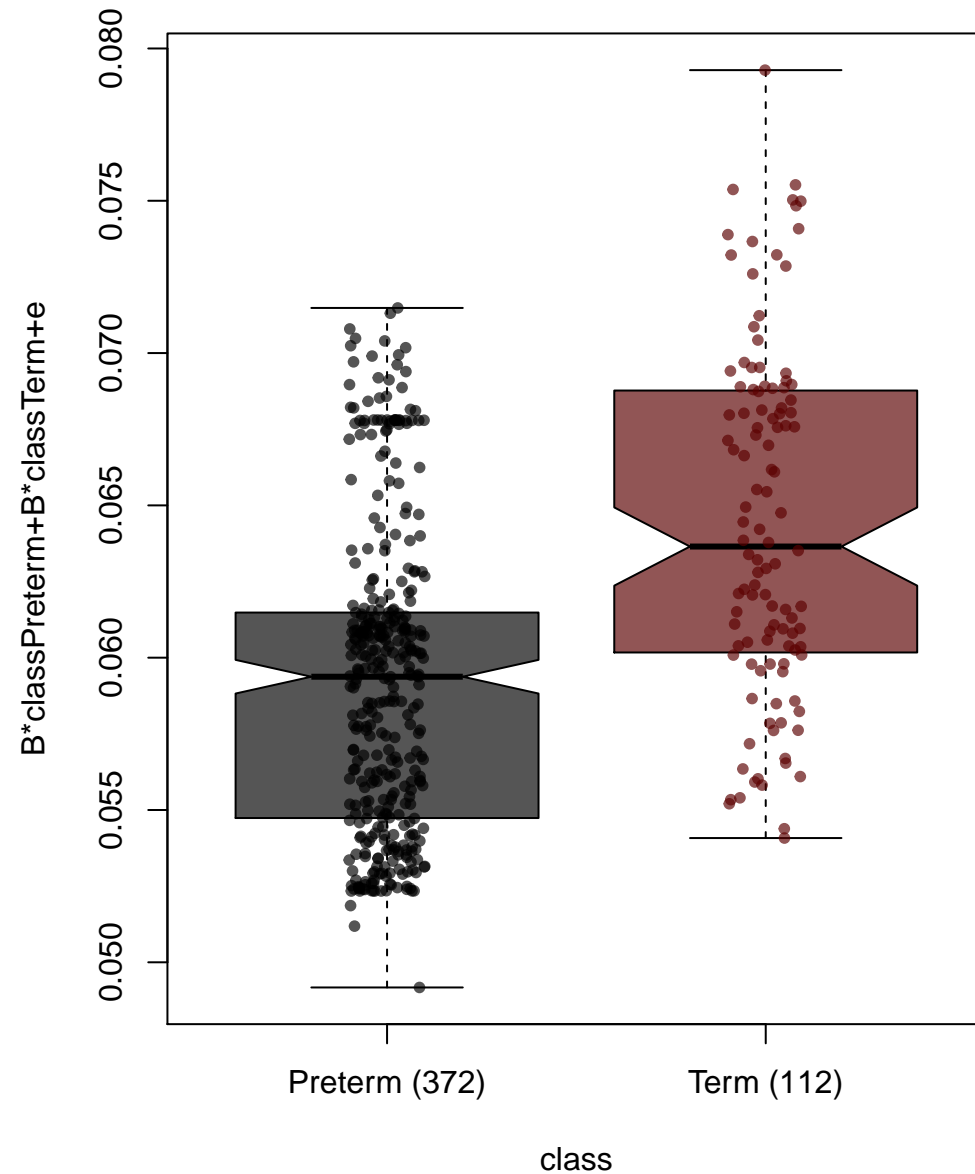



classTerm ( $-0.0103$  sd  $0.00112$ ,  $p=1.09e-18$ ,  $q=5.83e-18$ )

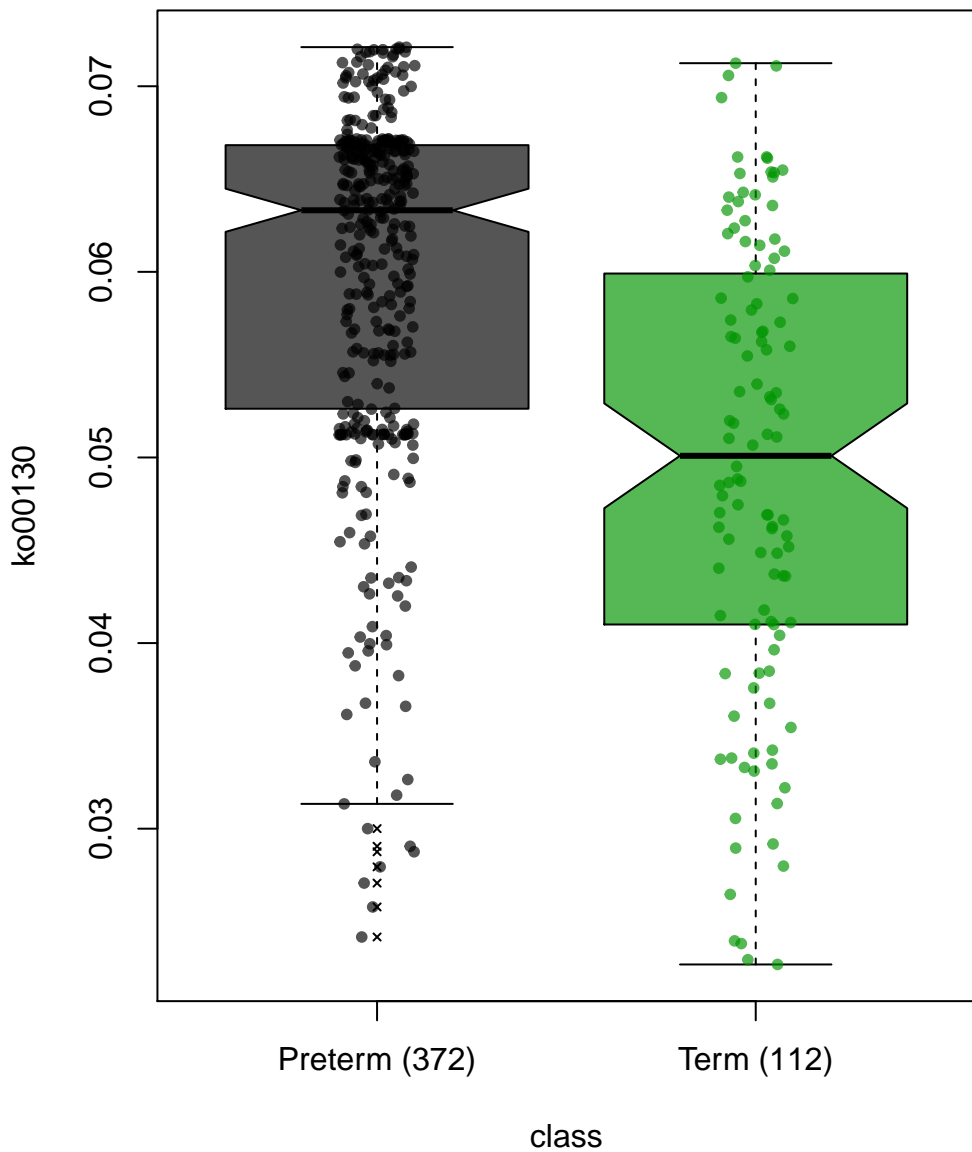

Partial Residual Plot

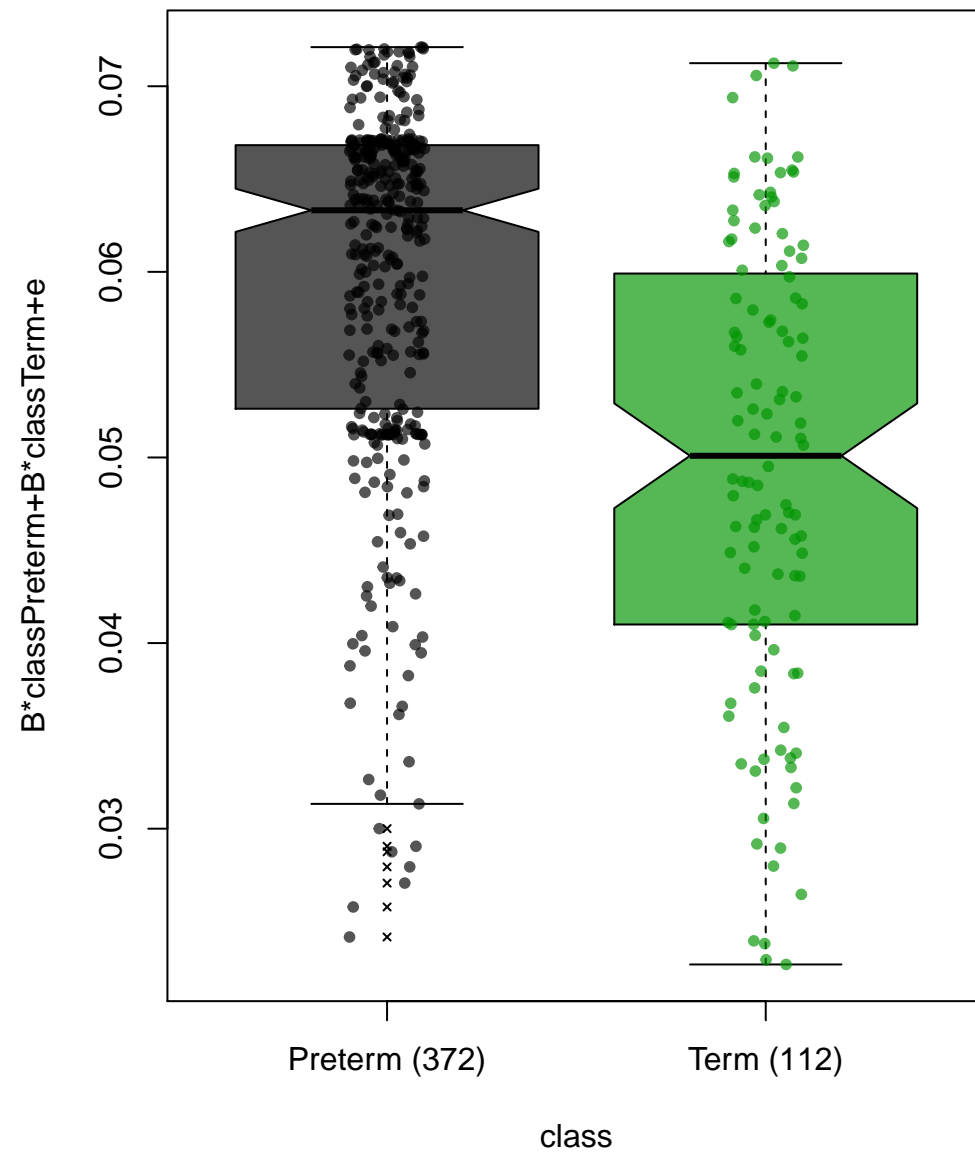

classTerm (0.0051 sd 0.00056, p=2.21e-18, q=1.16e-17)

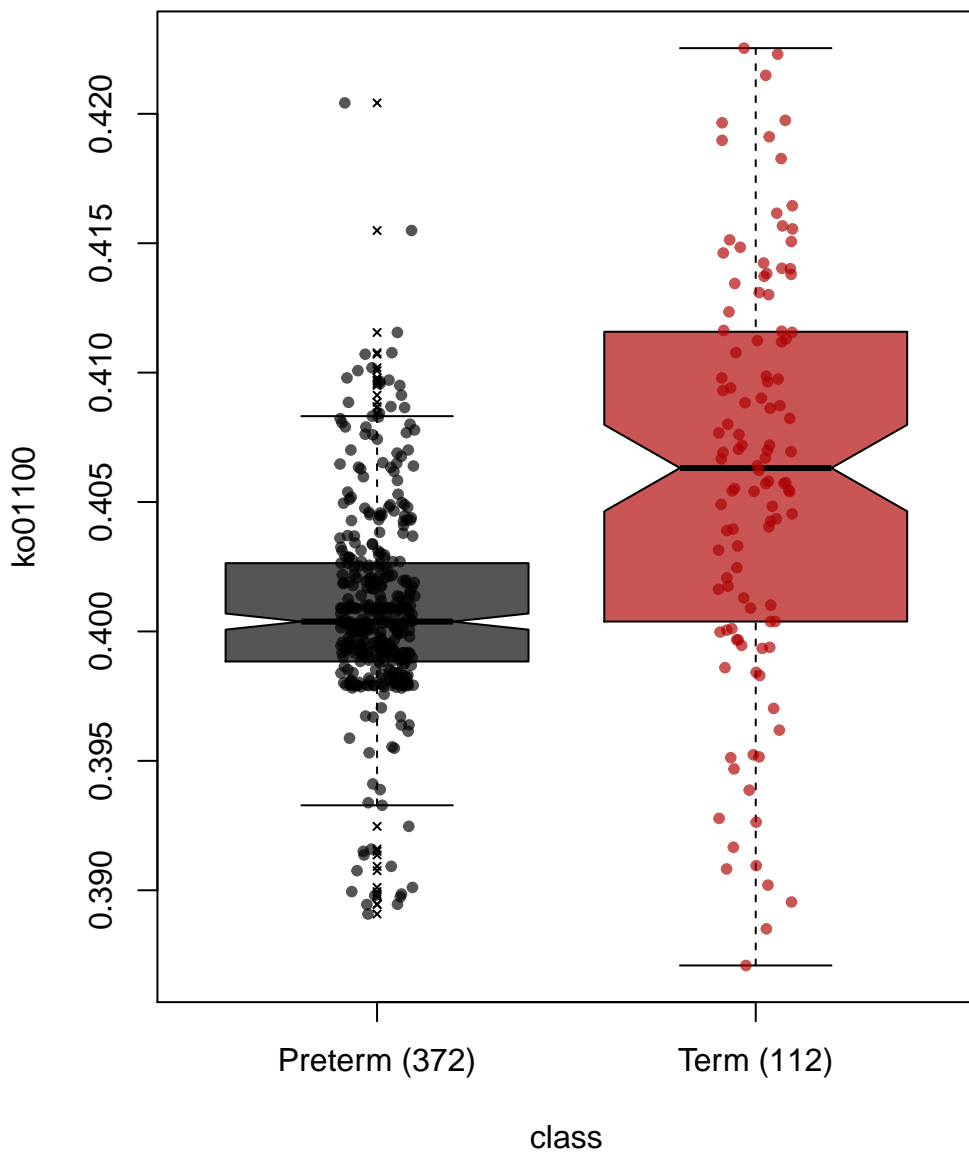

Partial Residual Plot

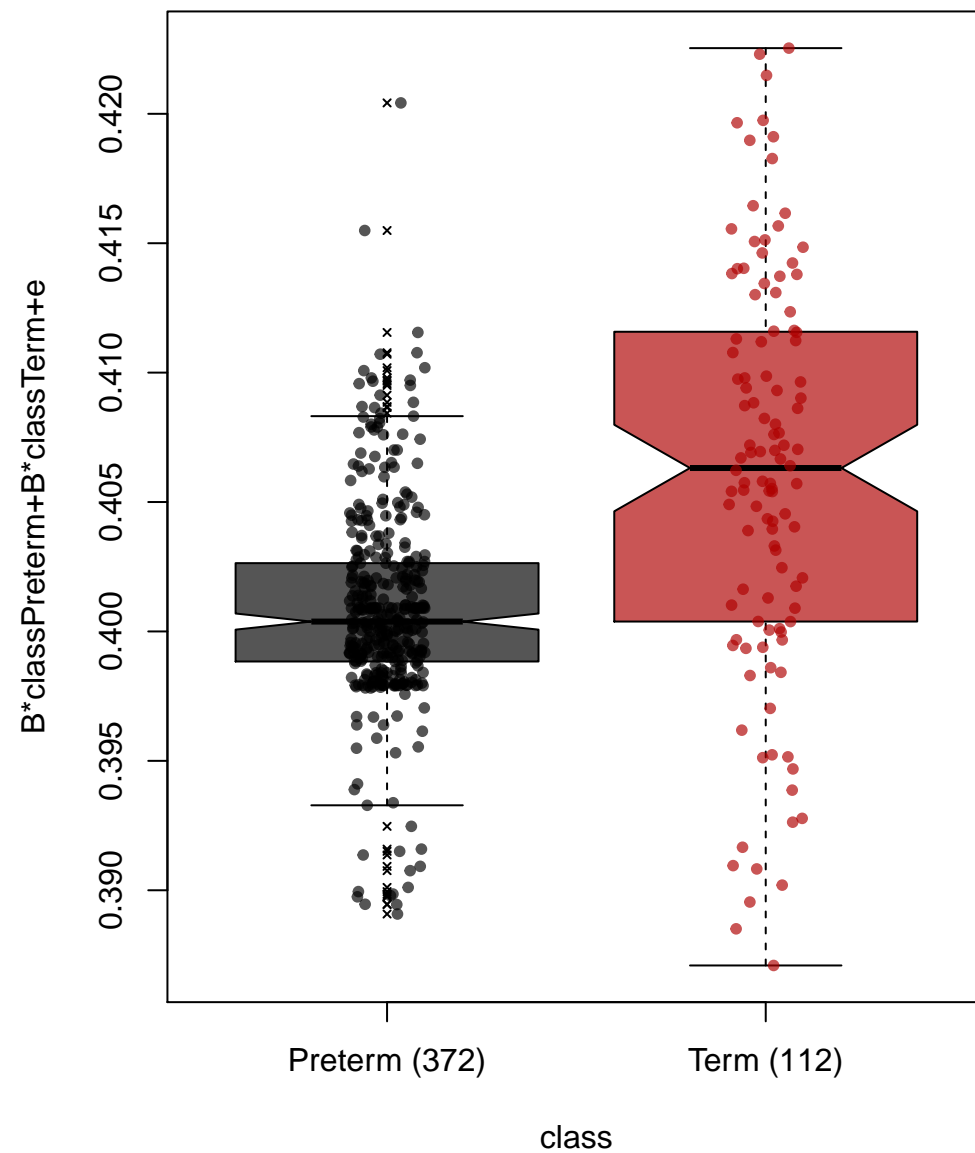

classTerm (0.00211 sd 0.000235, p=6.91e-18, q=3.57e-17)

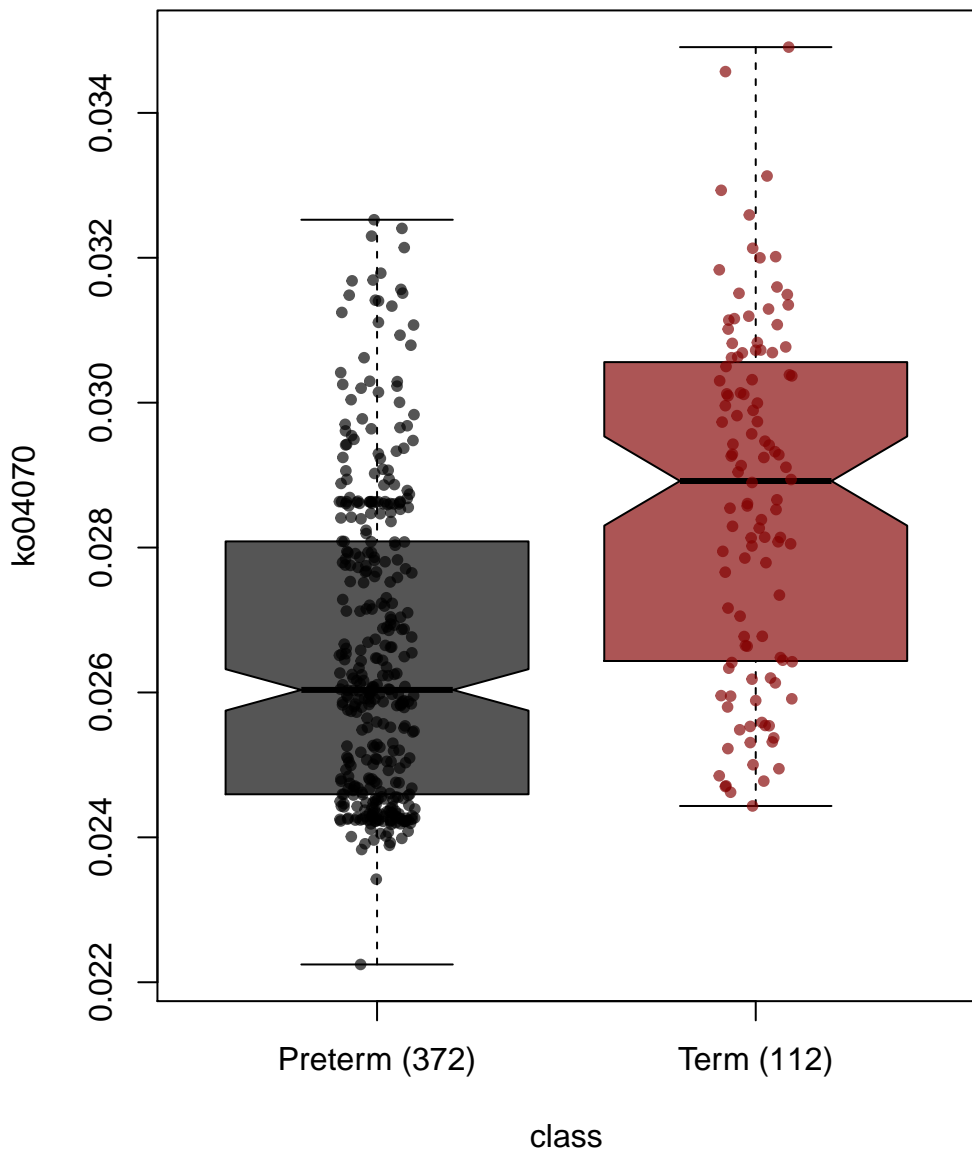

Partial Residual Plot

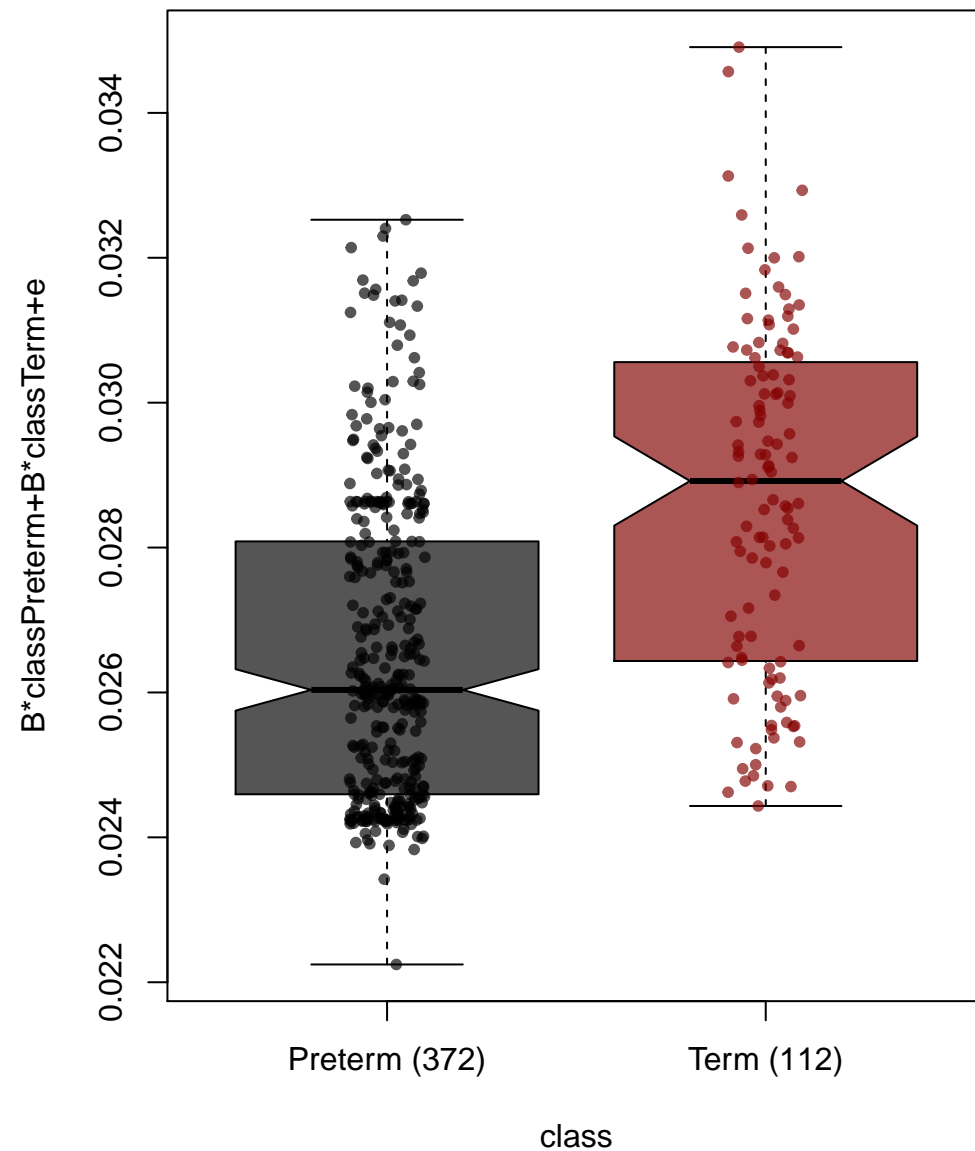

classTerm ( $-0.00791$  sd  $0.000894$ ,  $p=1.8e-17$ ,  $q=9.16e-17$ )

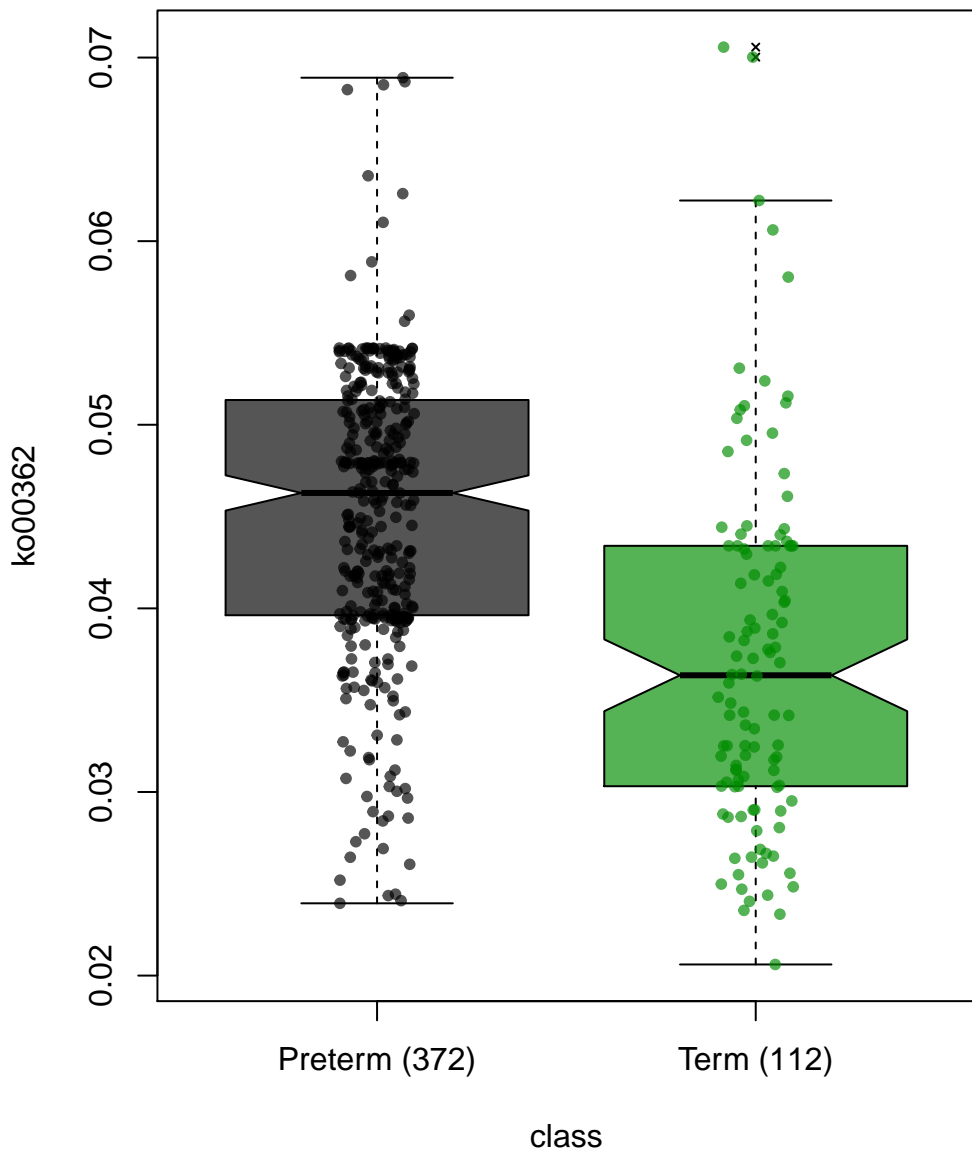

Partial Residual Plot

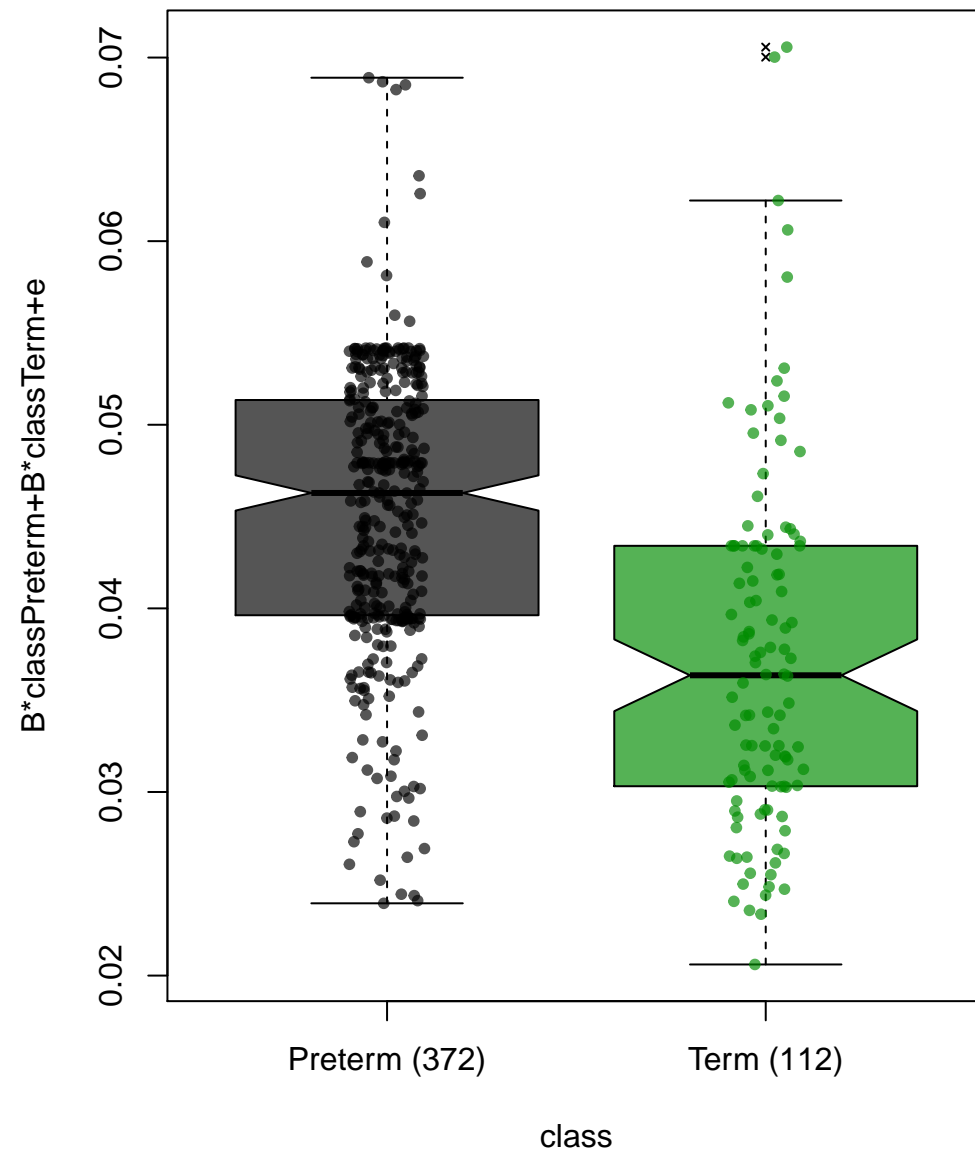

classTerm (0.00539 sd 0.000616, p=3.81e-17, q=1.9e-16)

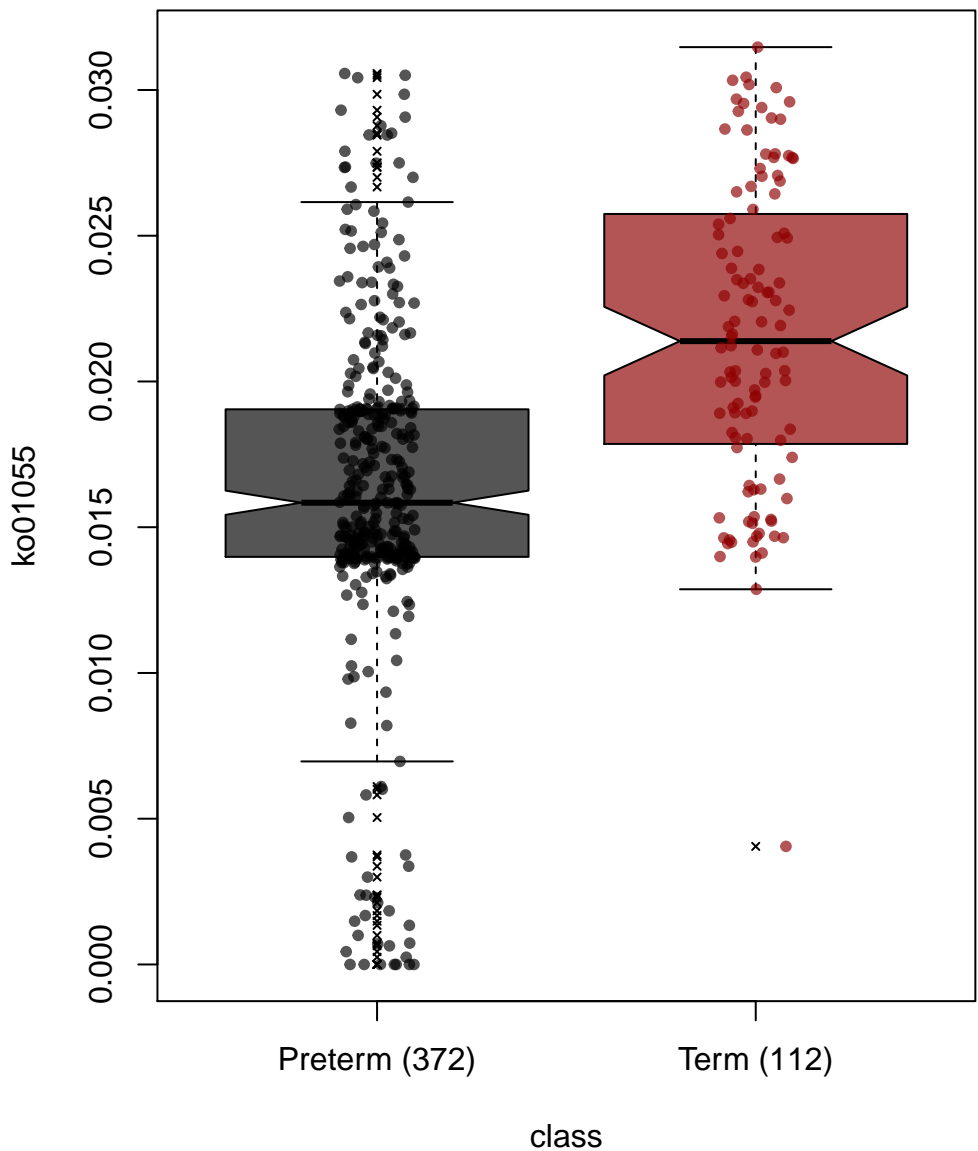

Partial Residual Plot

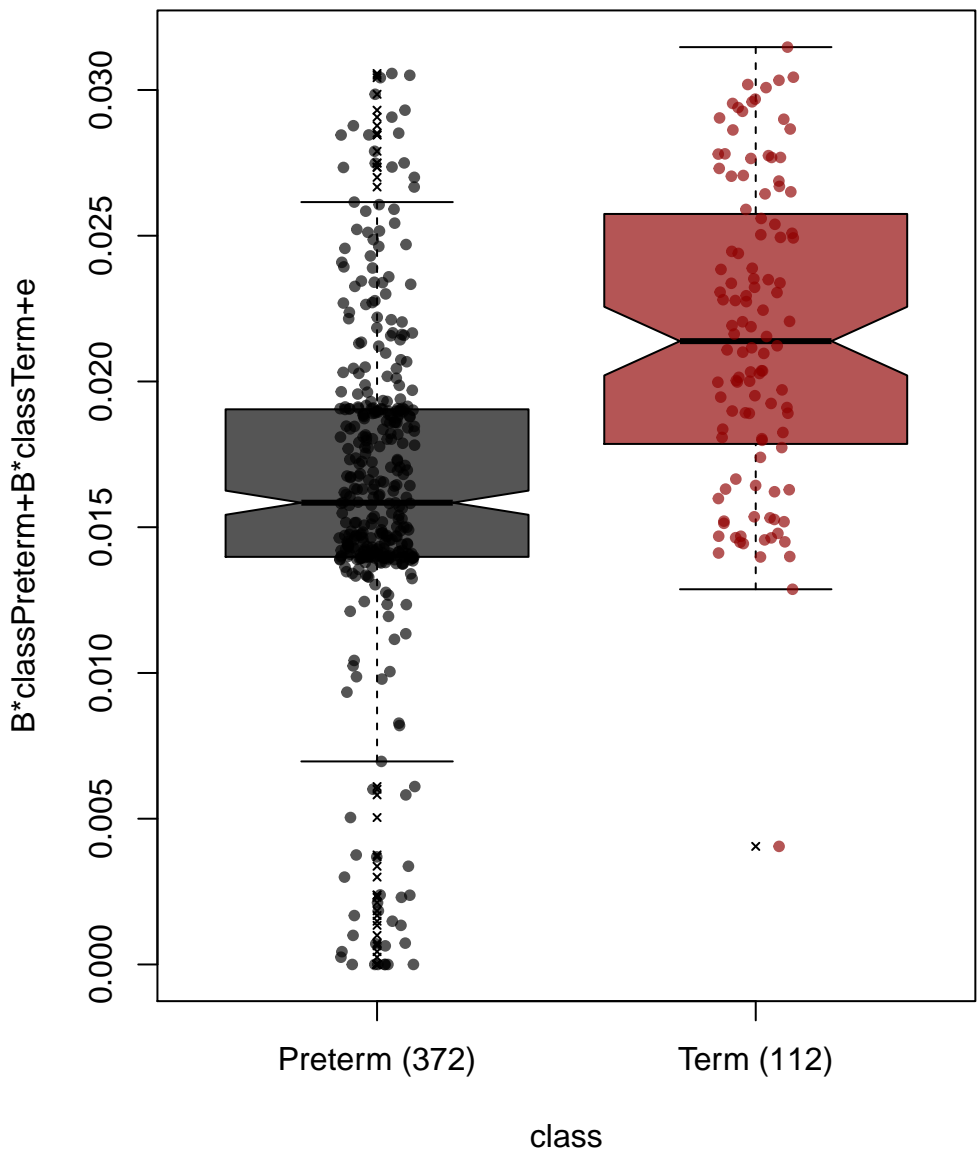

classTerm (0.00674 sd 0.000793, p=2.51e-16, q=1.23e-15)

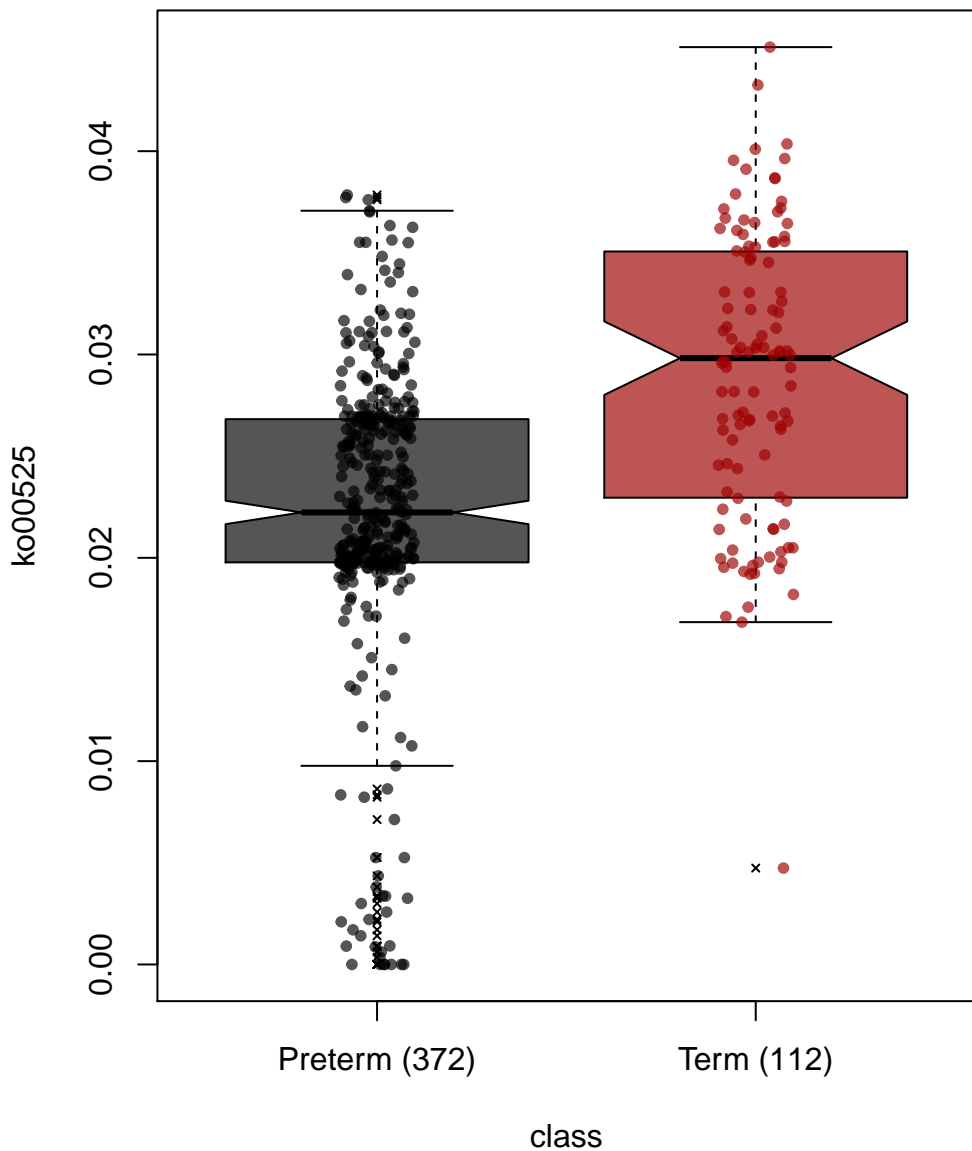

Partial Residual Plot

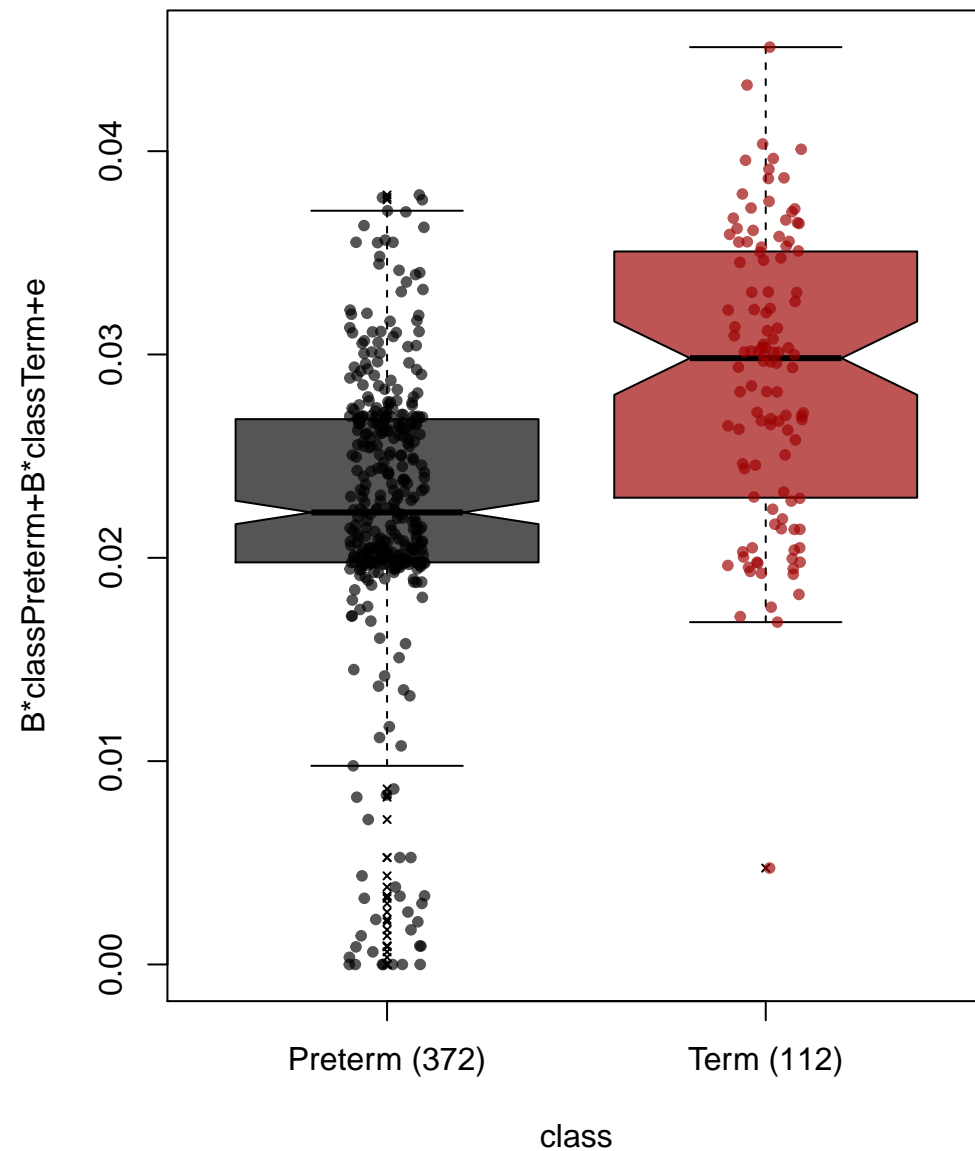

classTerm (0.00746 sd 0.000884, p=3.72e-16, q=1.79e-15)

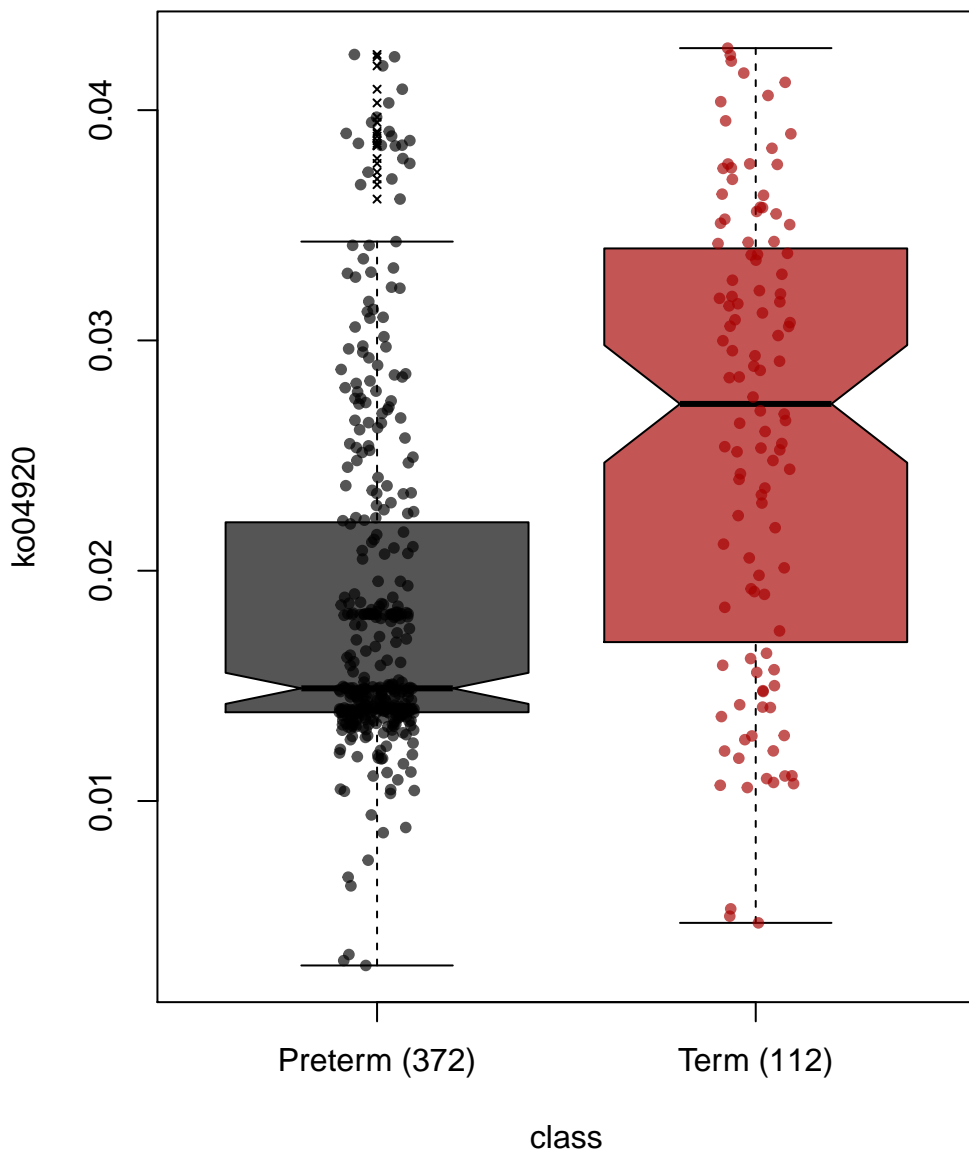

Partial Residual Plot

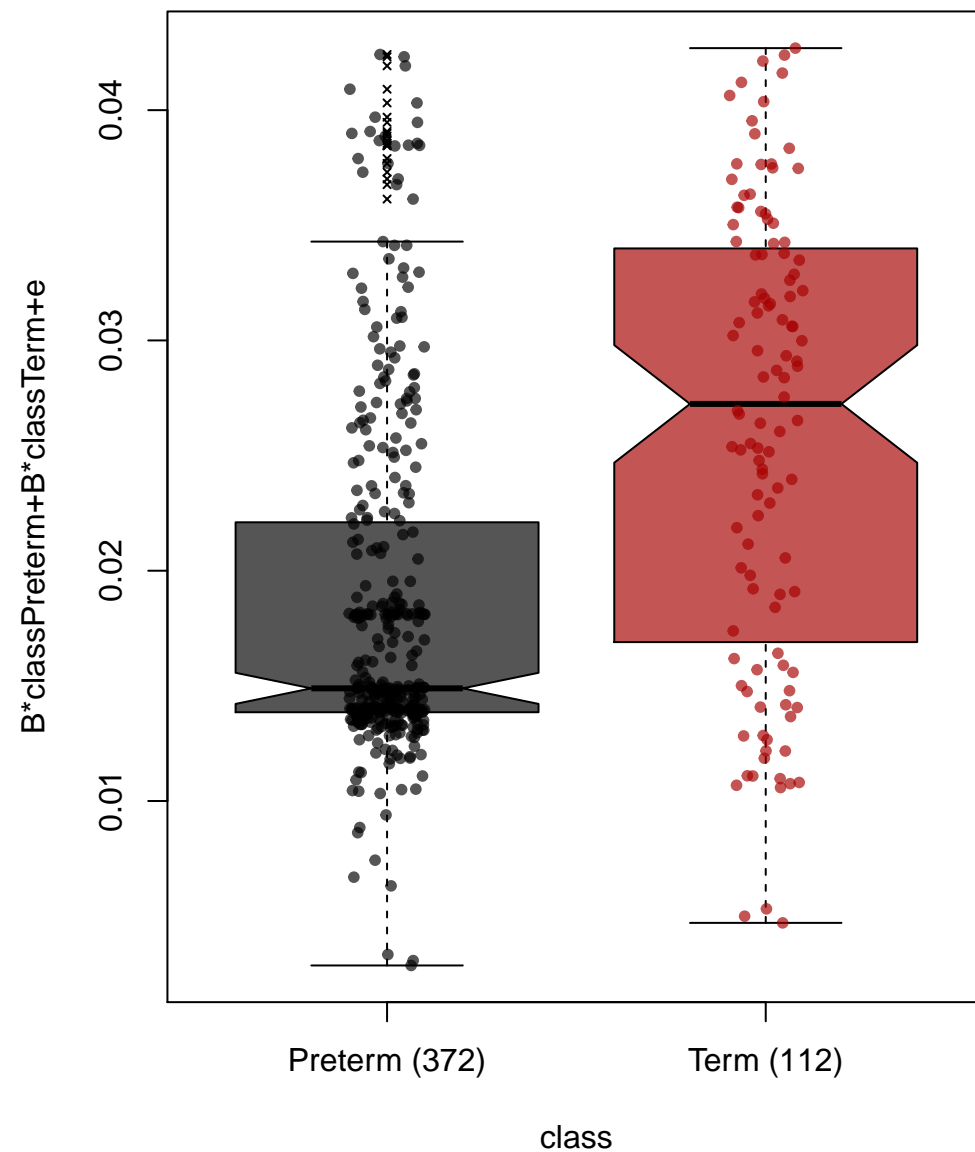

classTerm (−0.00284 sd 0.000345, p=1.65e−15, q=7.69e−15)

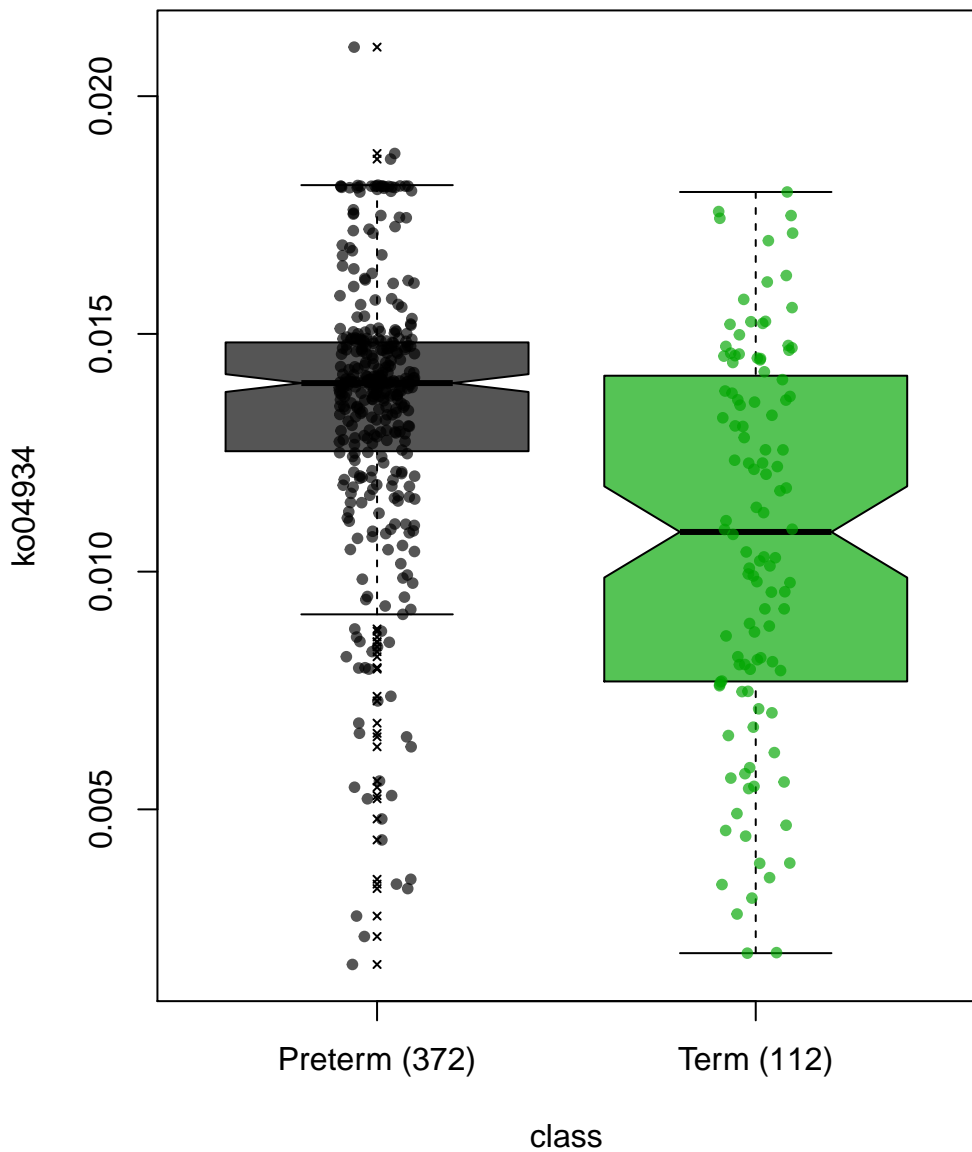

Partial Residual Plot

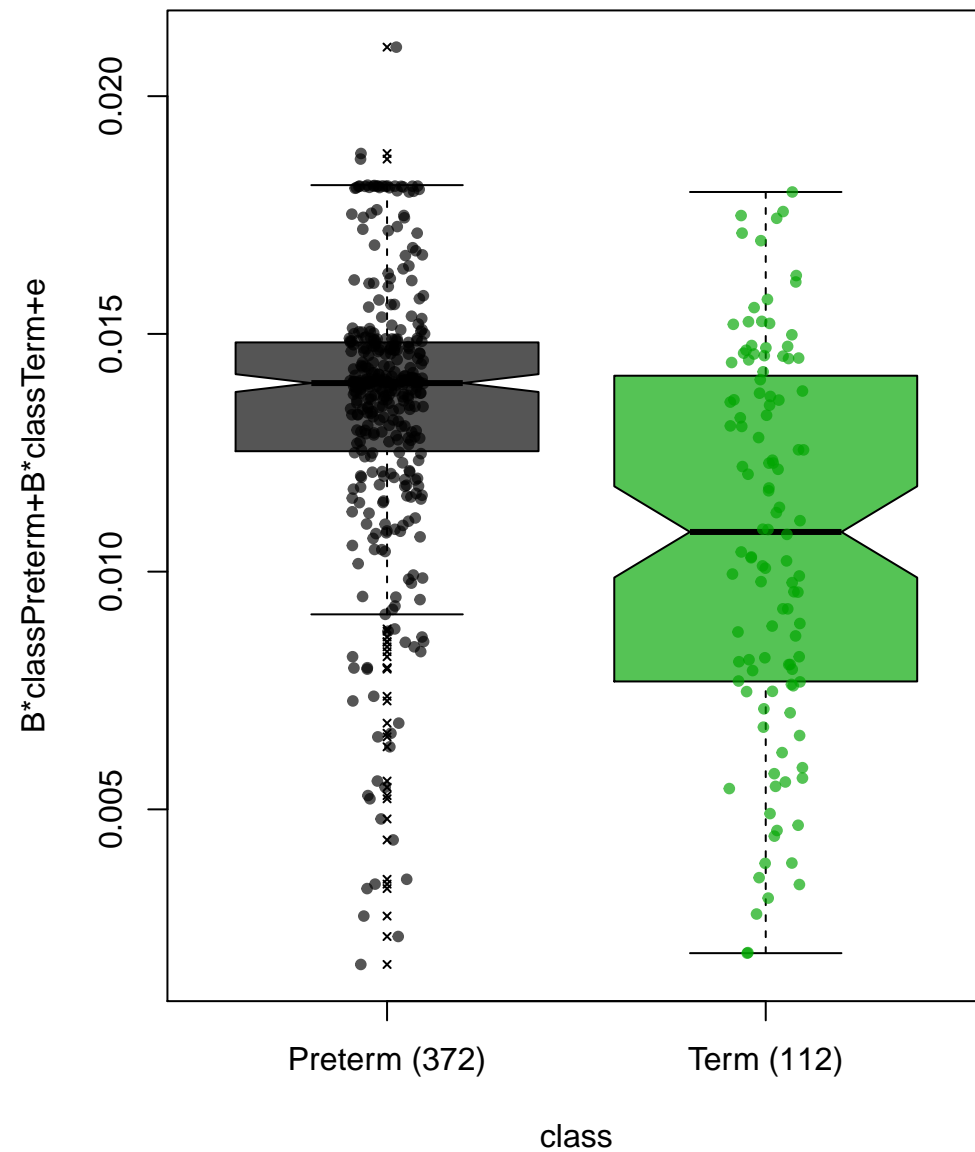



classTerm (−0.00284 sd 0.000345, p=1.65e−15, q=7.69e−15)

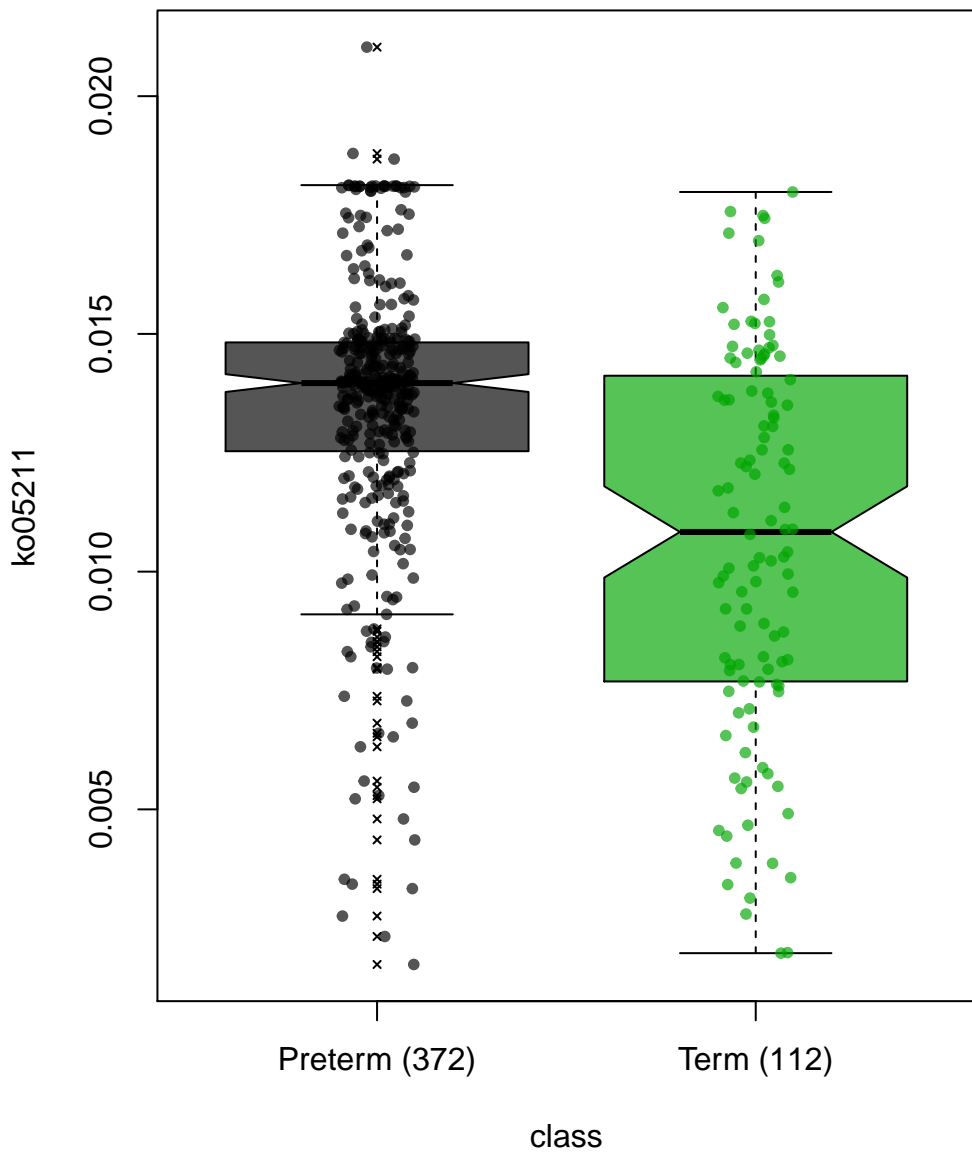

Partial Residual Plot

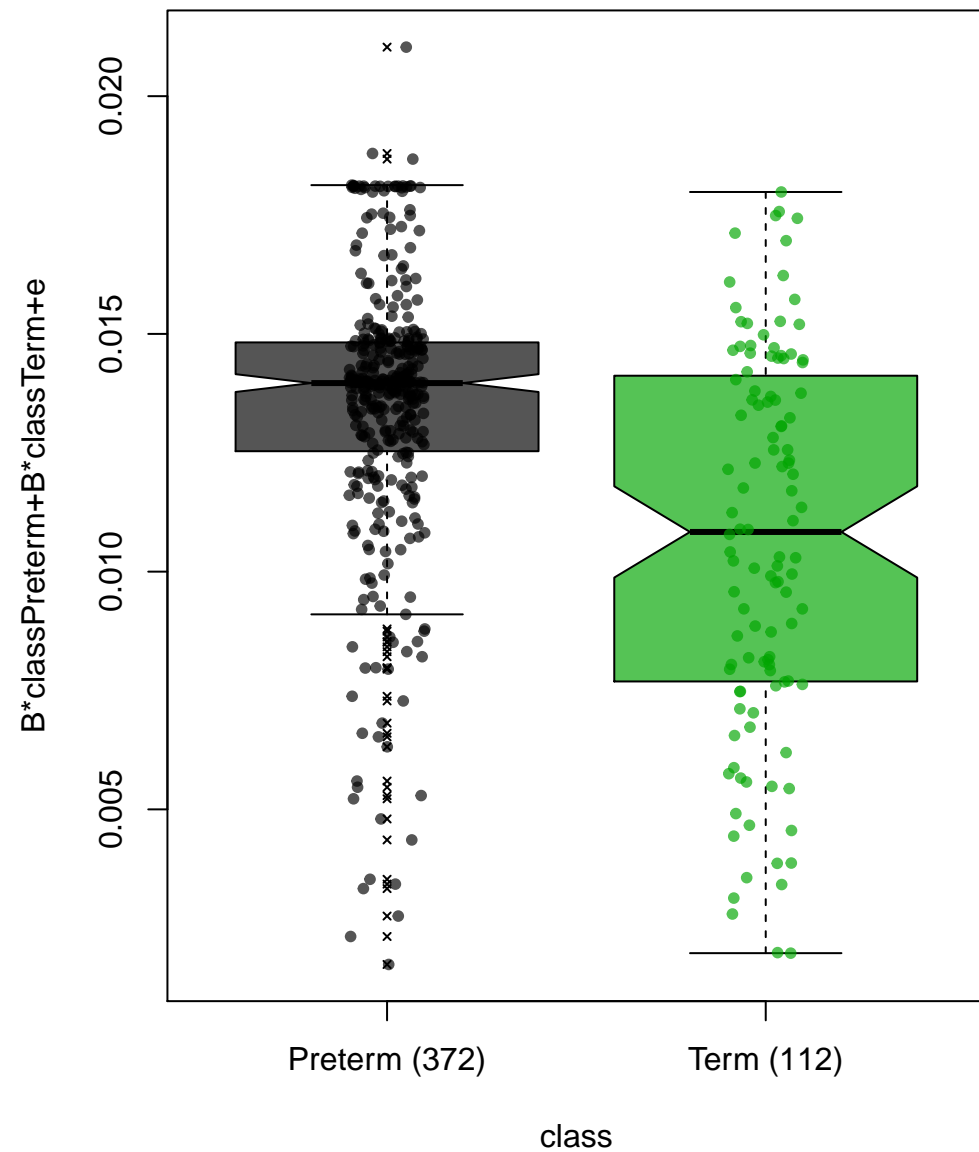

classTerm (0.00464 sd 0.000565, p=2.01e-15, q=9.18e-15)

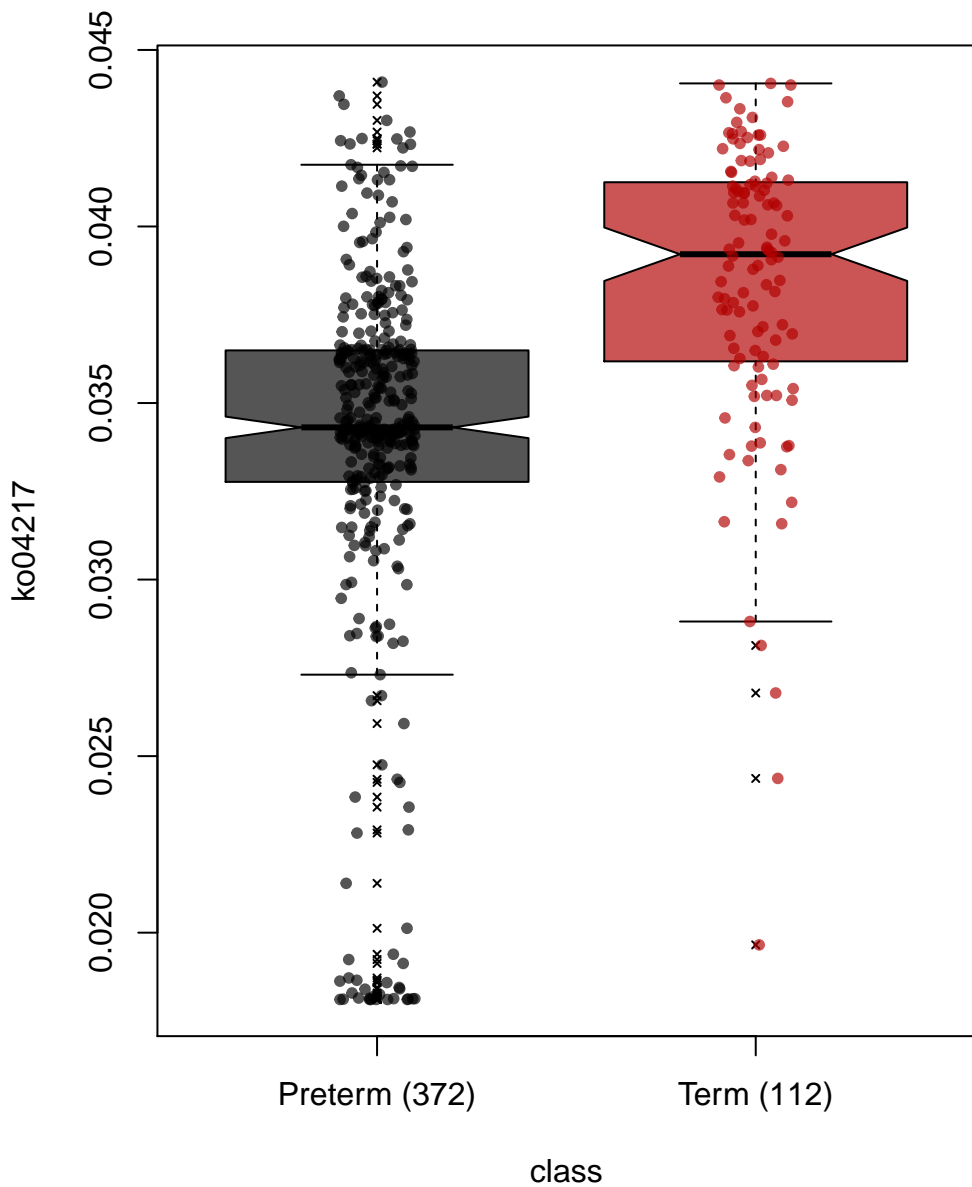

Partial Residual Plot

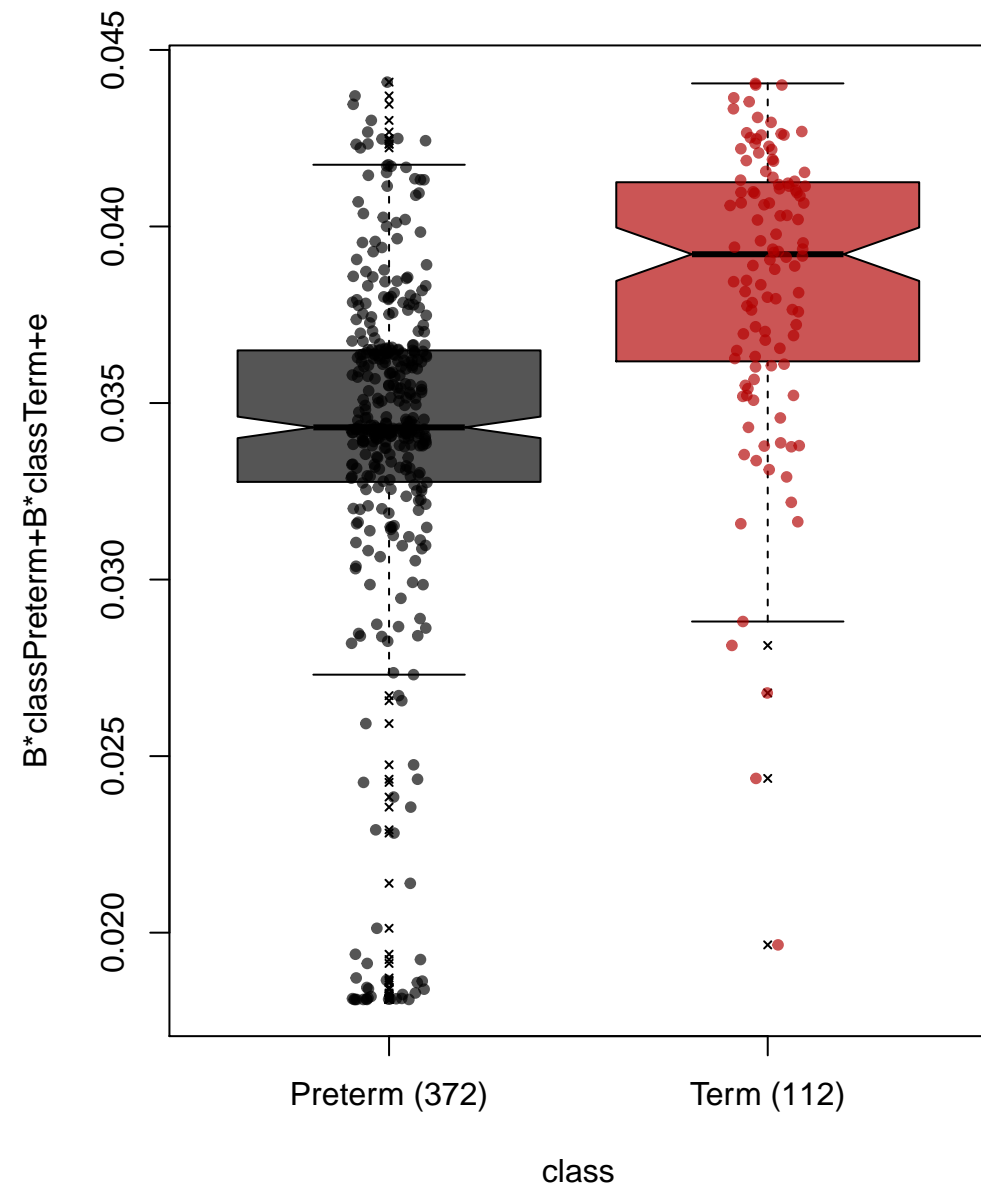

classTerm (0.00369 sd 0.000457, p=5.2e-15, q=2.34e-14)

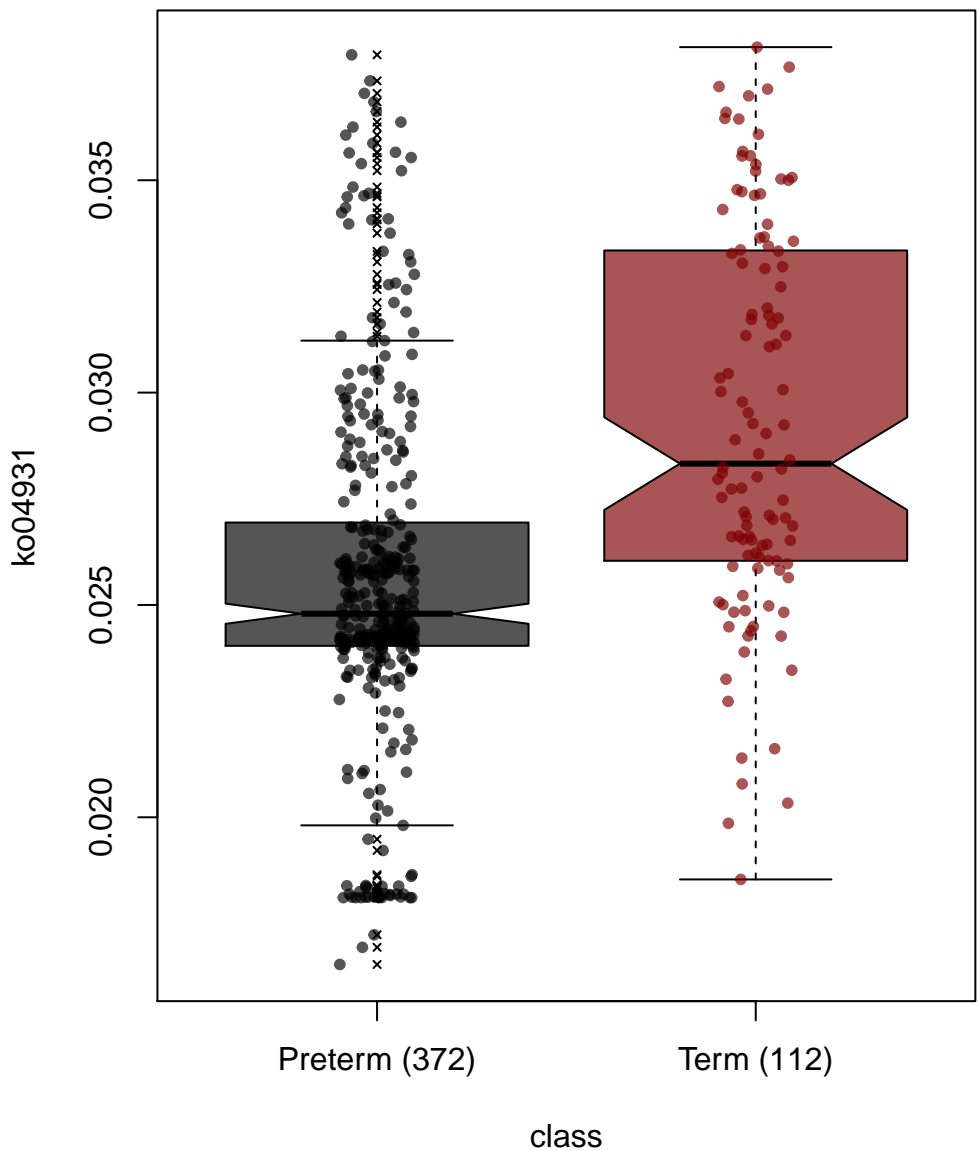

Partial Residual Plot

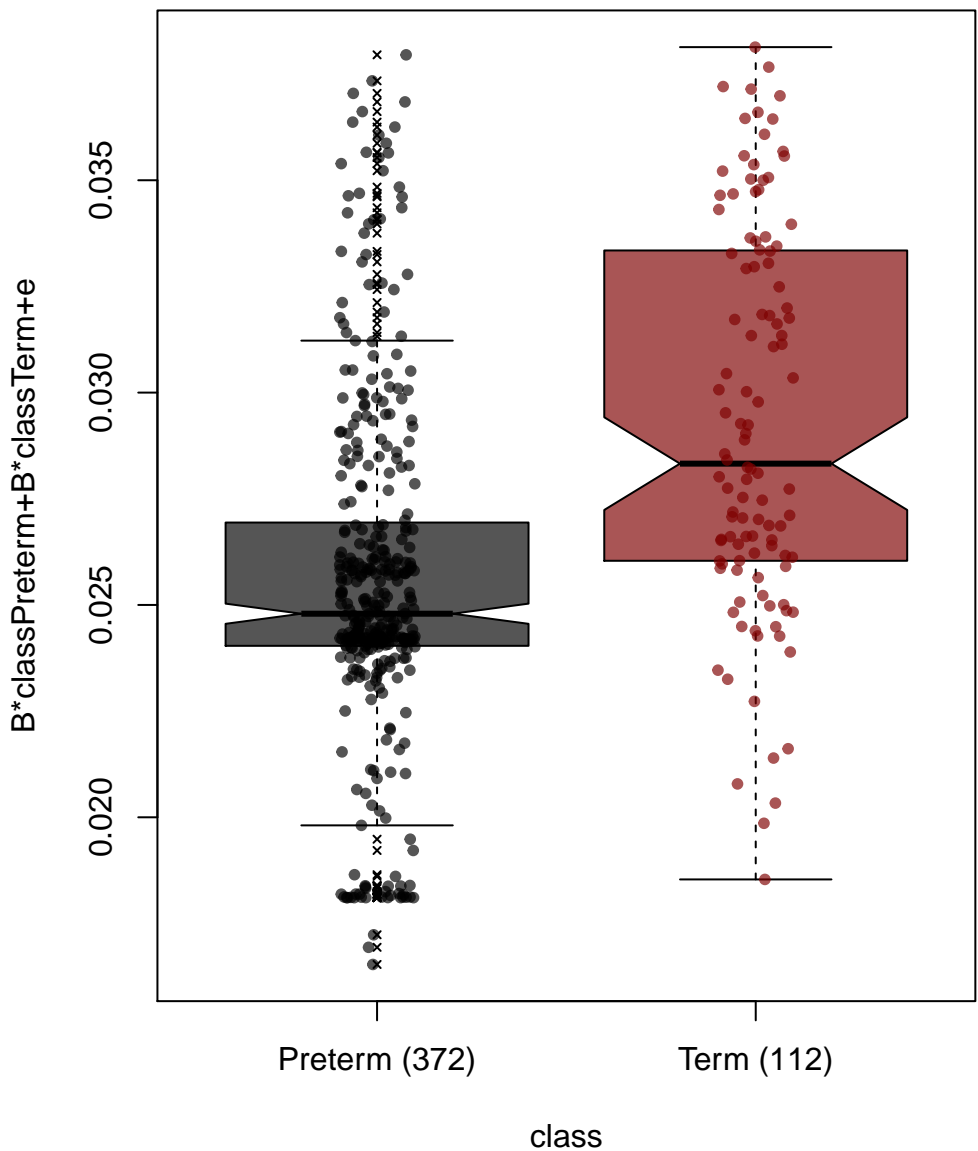

classTerm (0.0058 sd 0.000729, p=1.28e-14, q=5.67e-14)

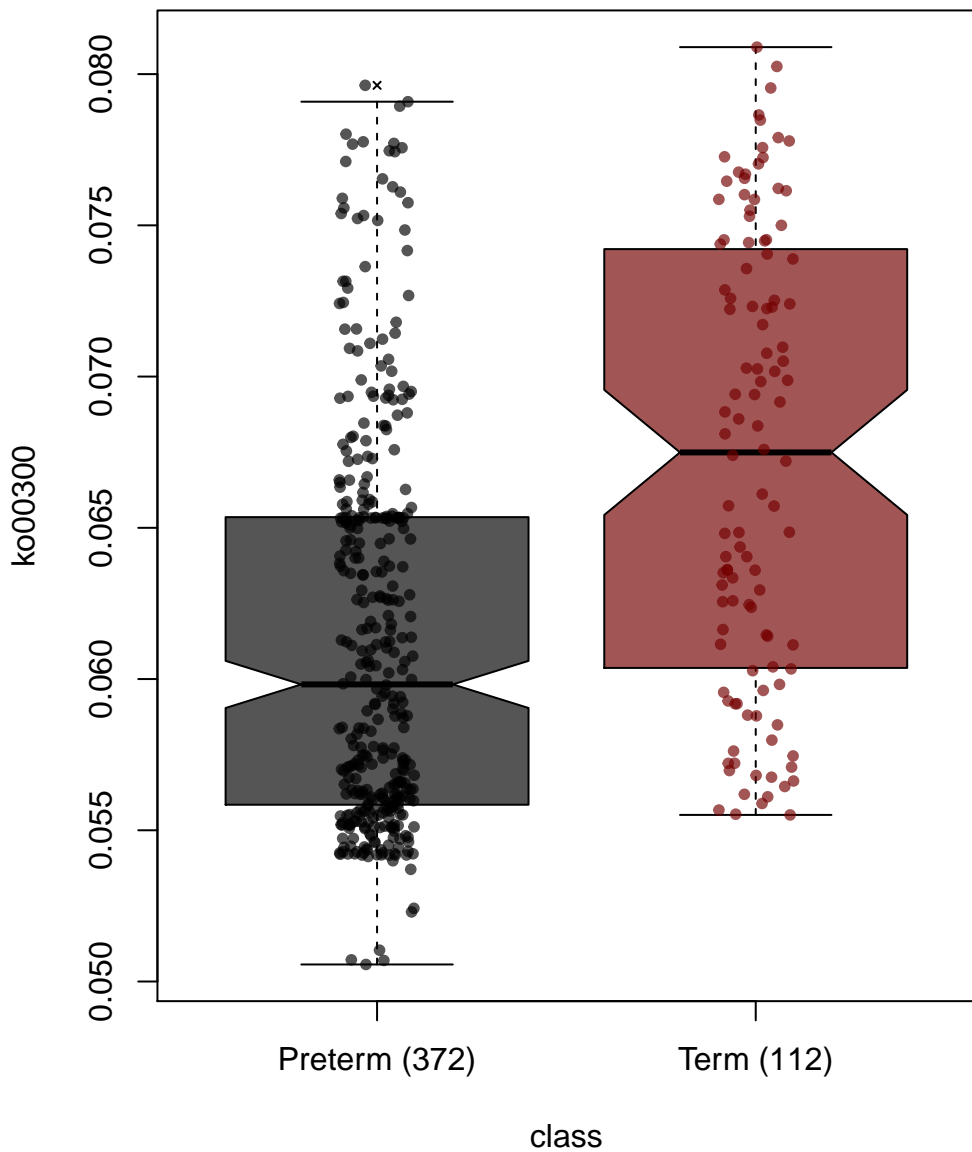

Partial Residual Plot

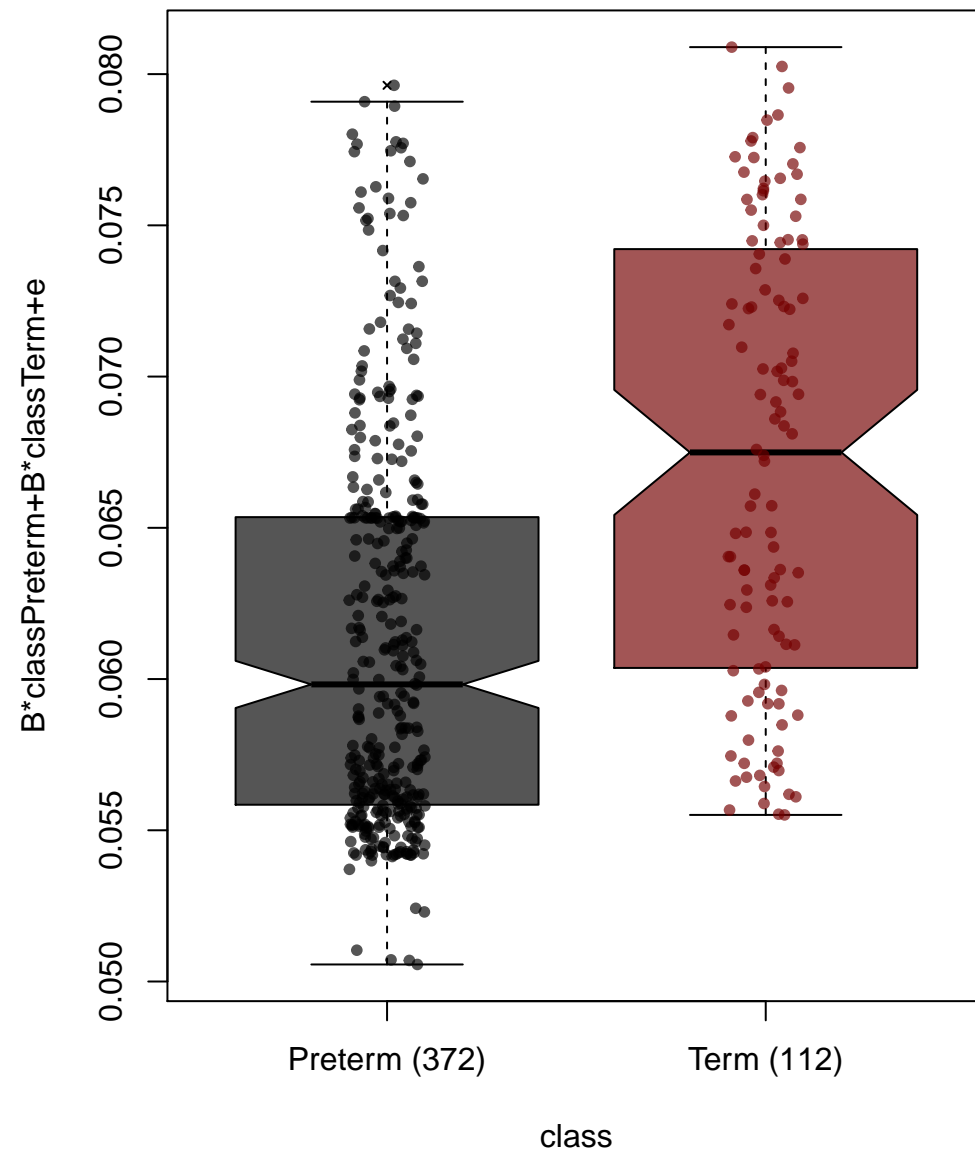

classTerm ( $-0.00783$  sd  $0.000987$ ,  $p=1.48e-14$ ,  $q=6.44e-14$ )

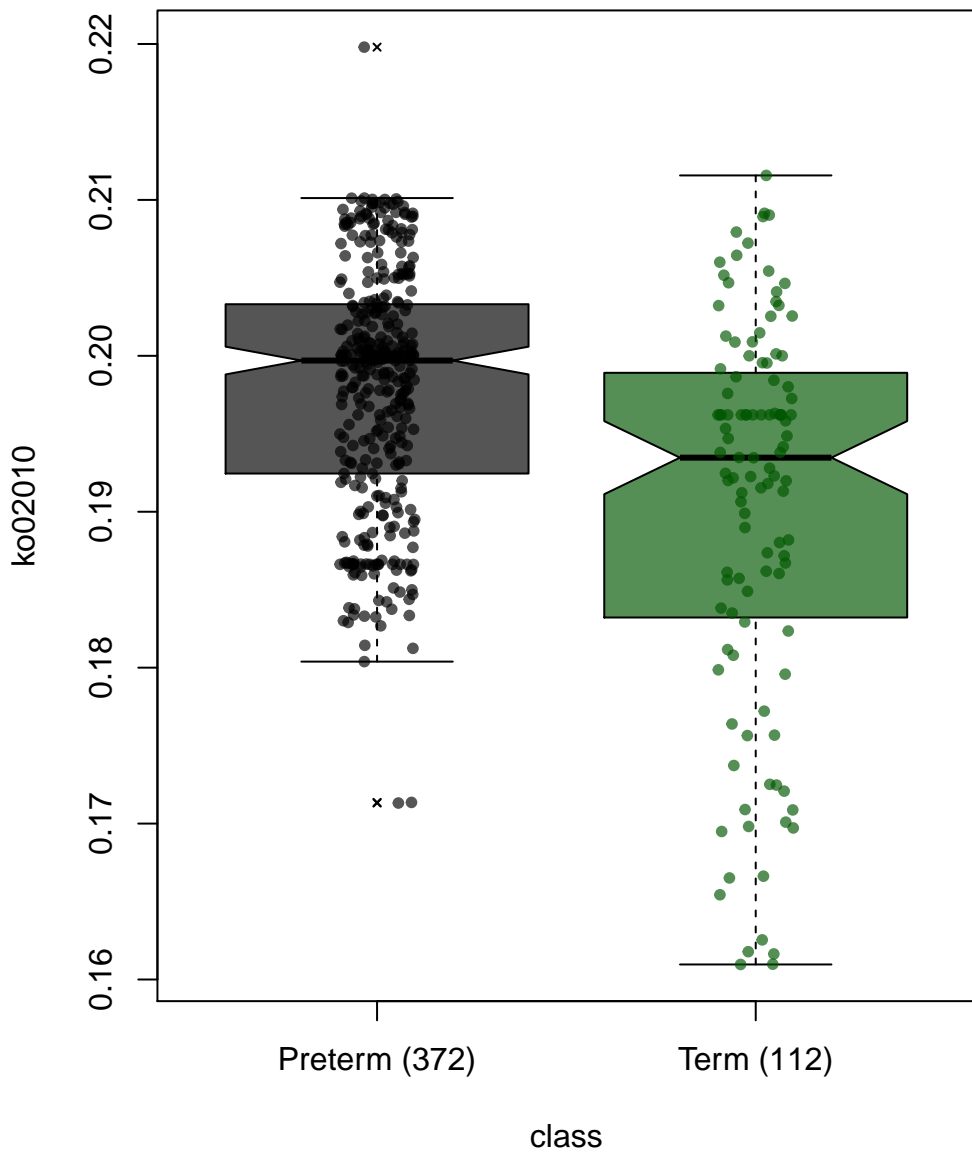

Partial Residual Plot

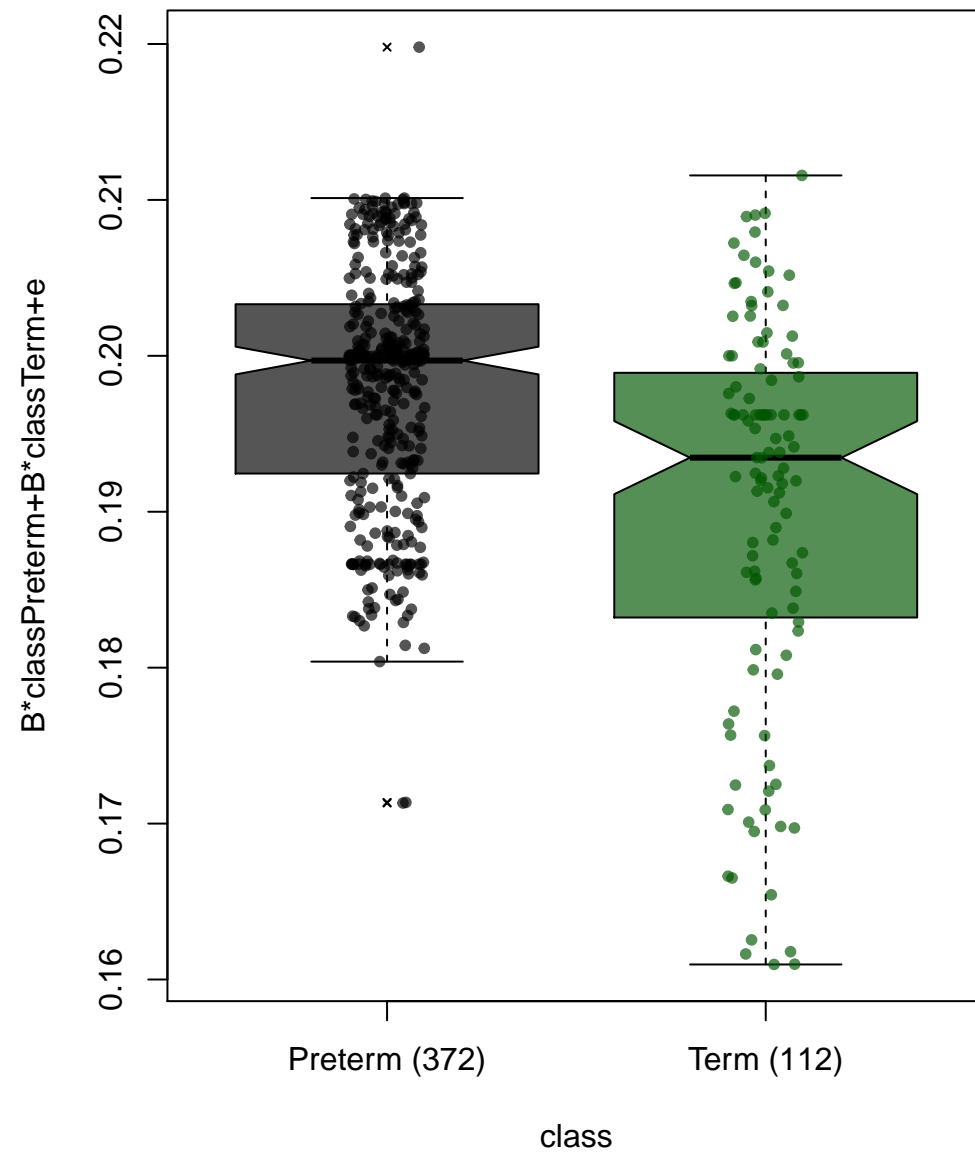

classTerm (0.00396 sd 0.000502, p=2.01e-14, q=8.63e-14)

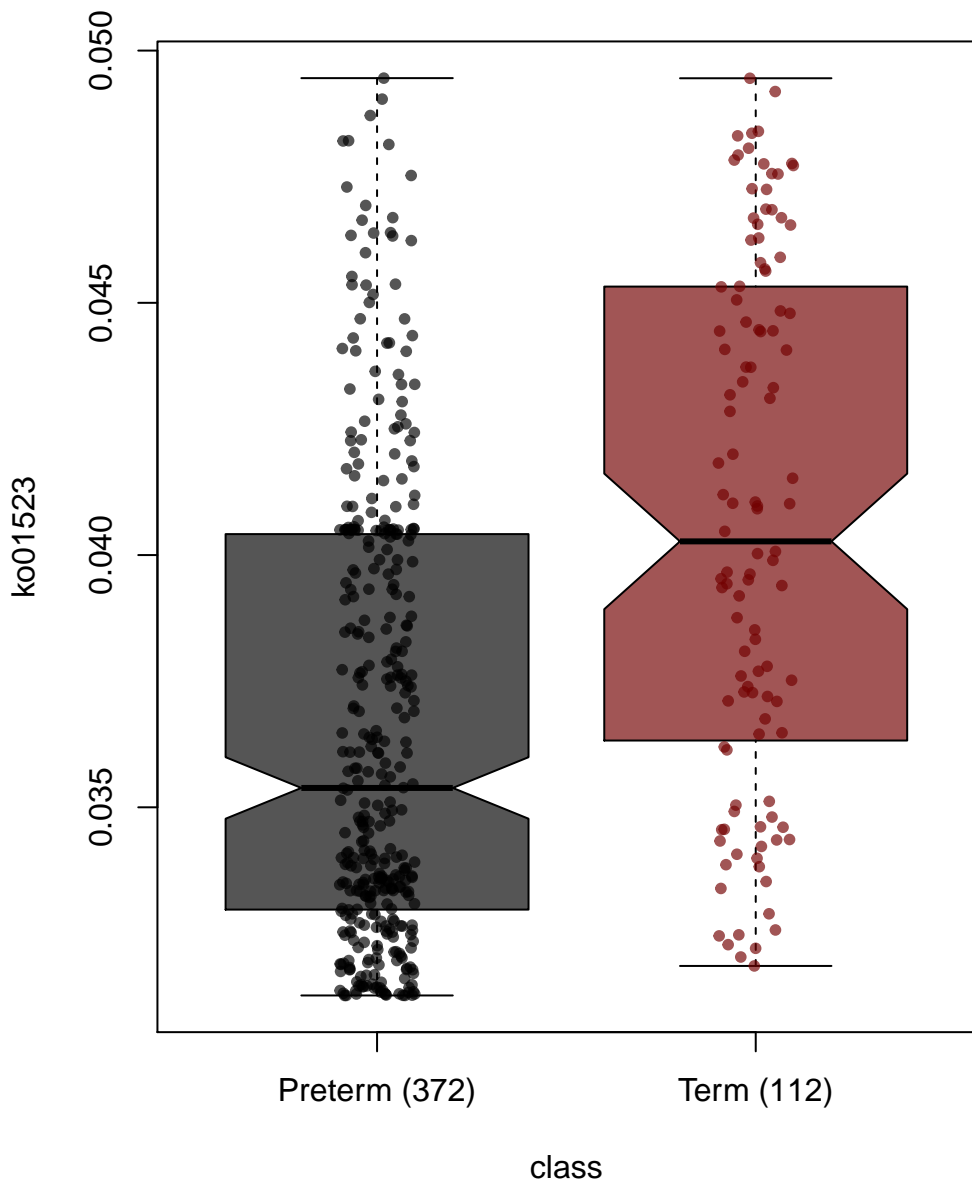

Partial Residual Plot

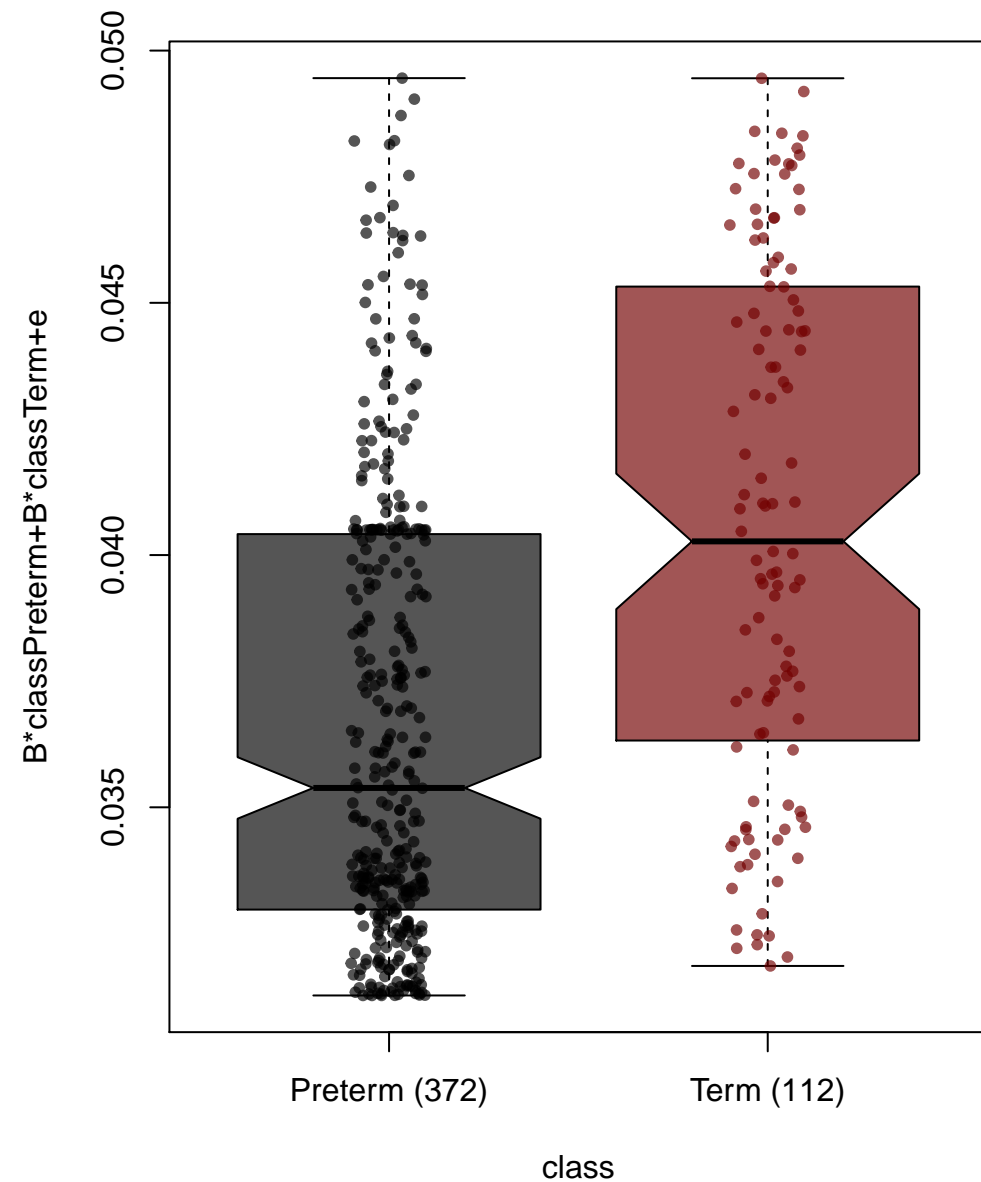

classTerm (−0.00763 sd 0.000979, p=4.07e−14, q=1.71e−13)

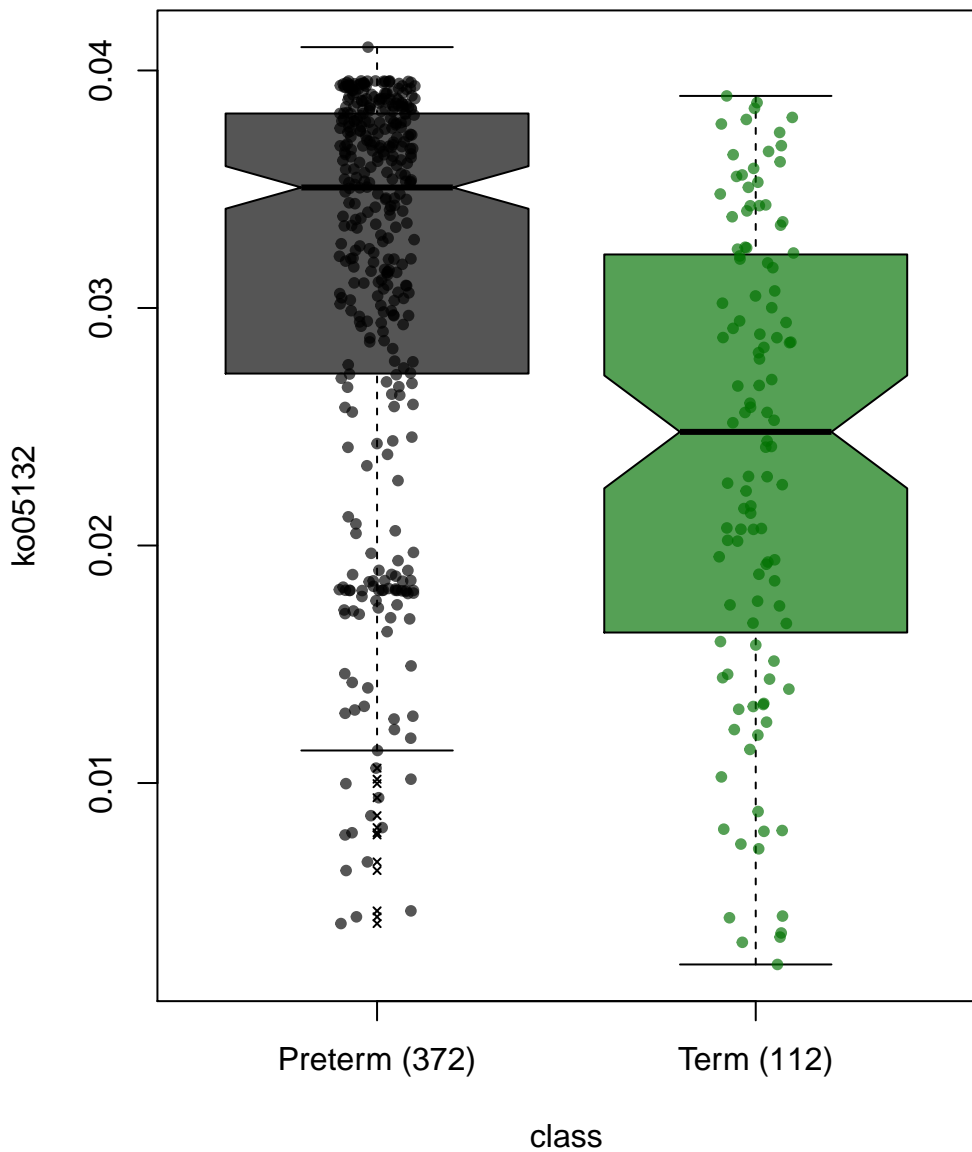

Partial Residual Plot

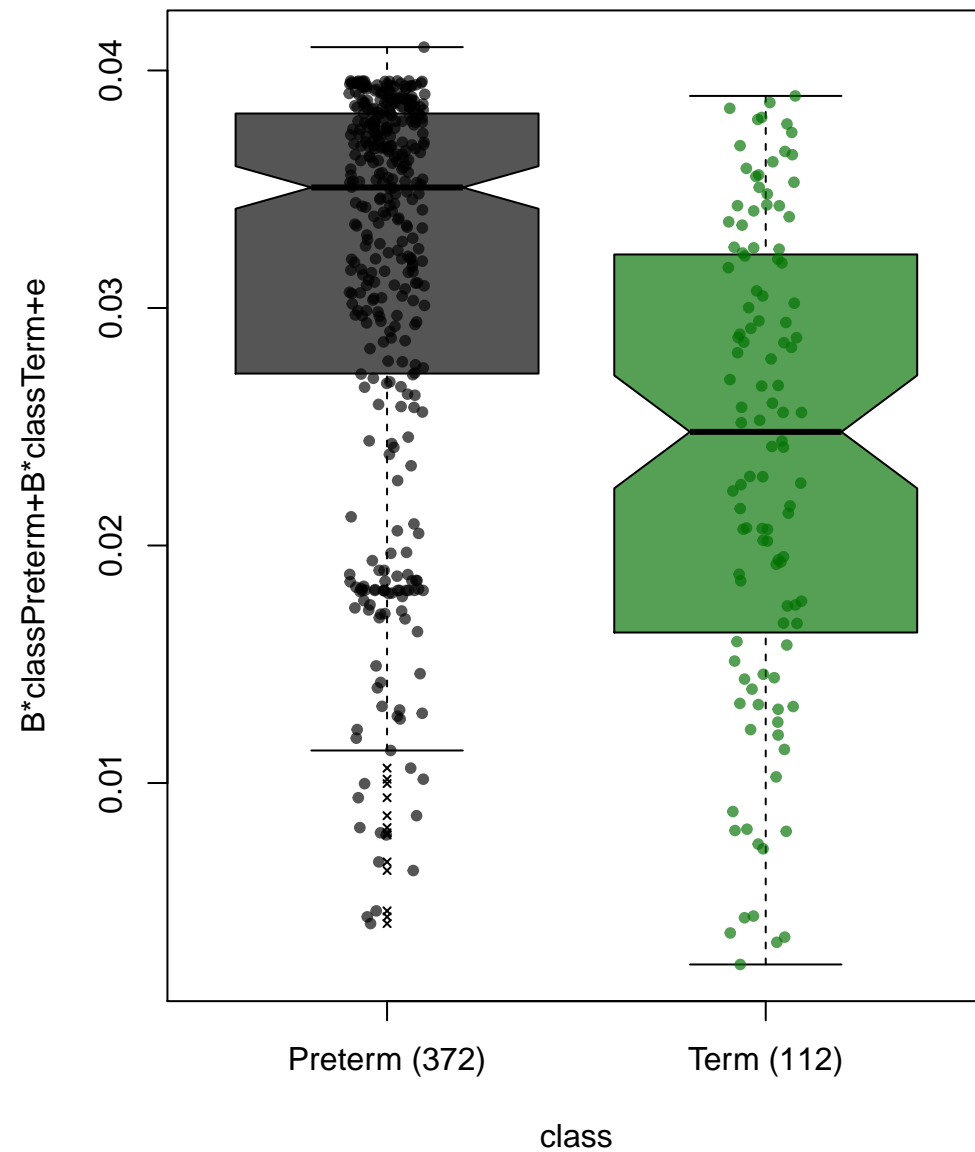

classTerm (0.00597 sd 0.000766, p=4.1e-14, q=1.71e-13)

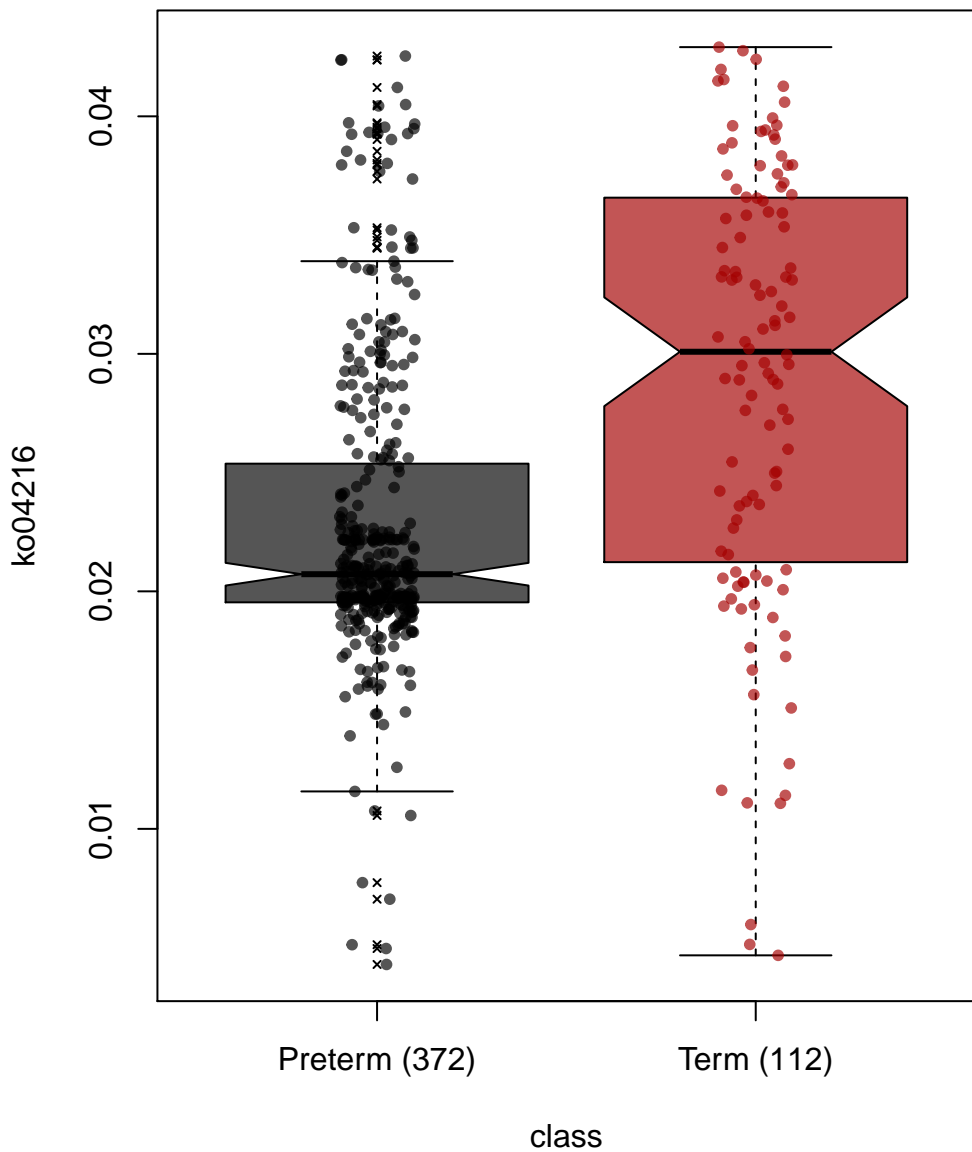

Partial Residual Plot

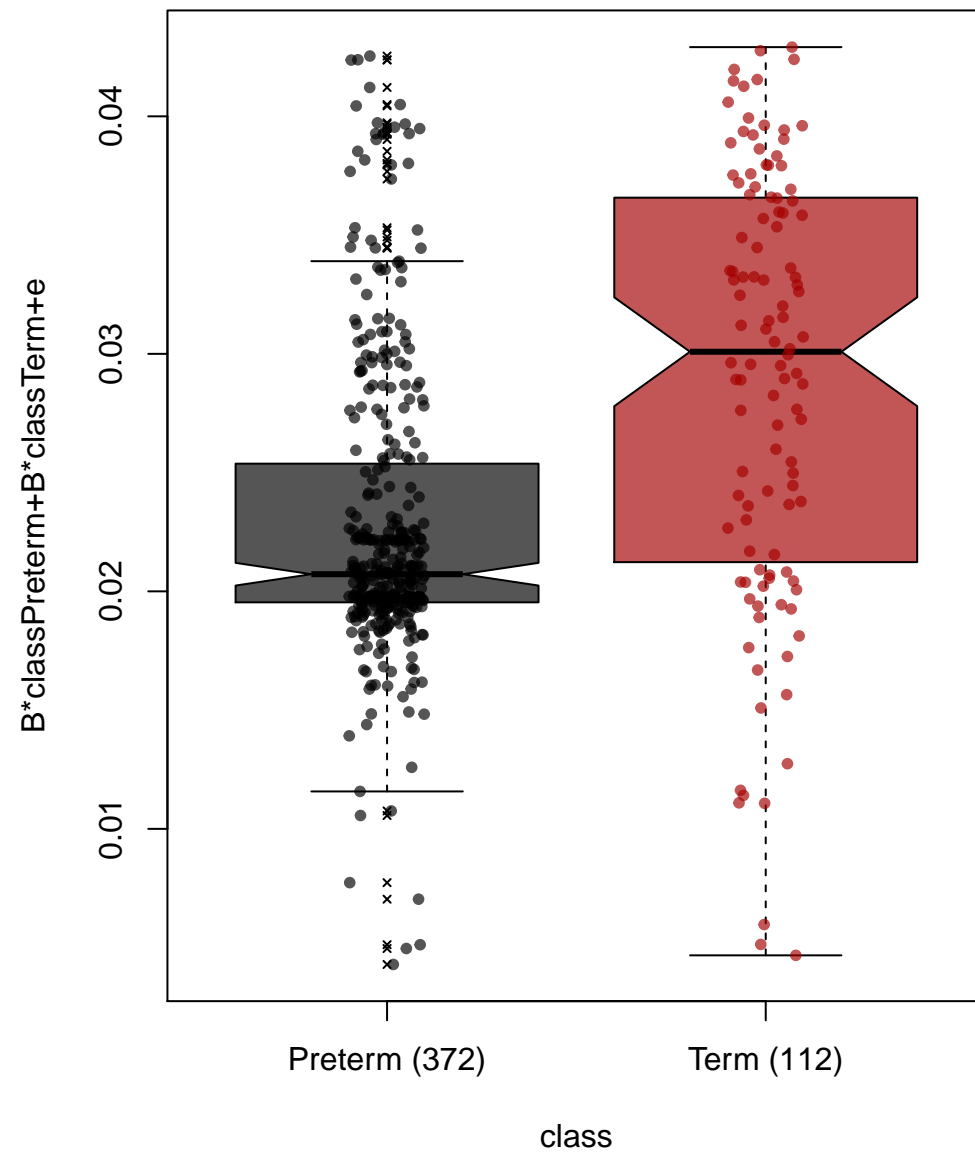



classTerm (0.00518 sd 0.000674, p=8.35e-14, q=3.43e-13)

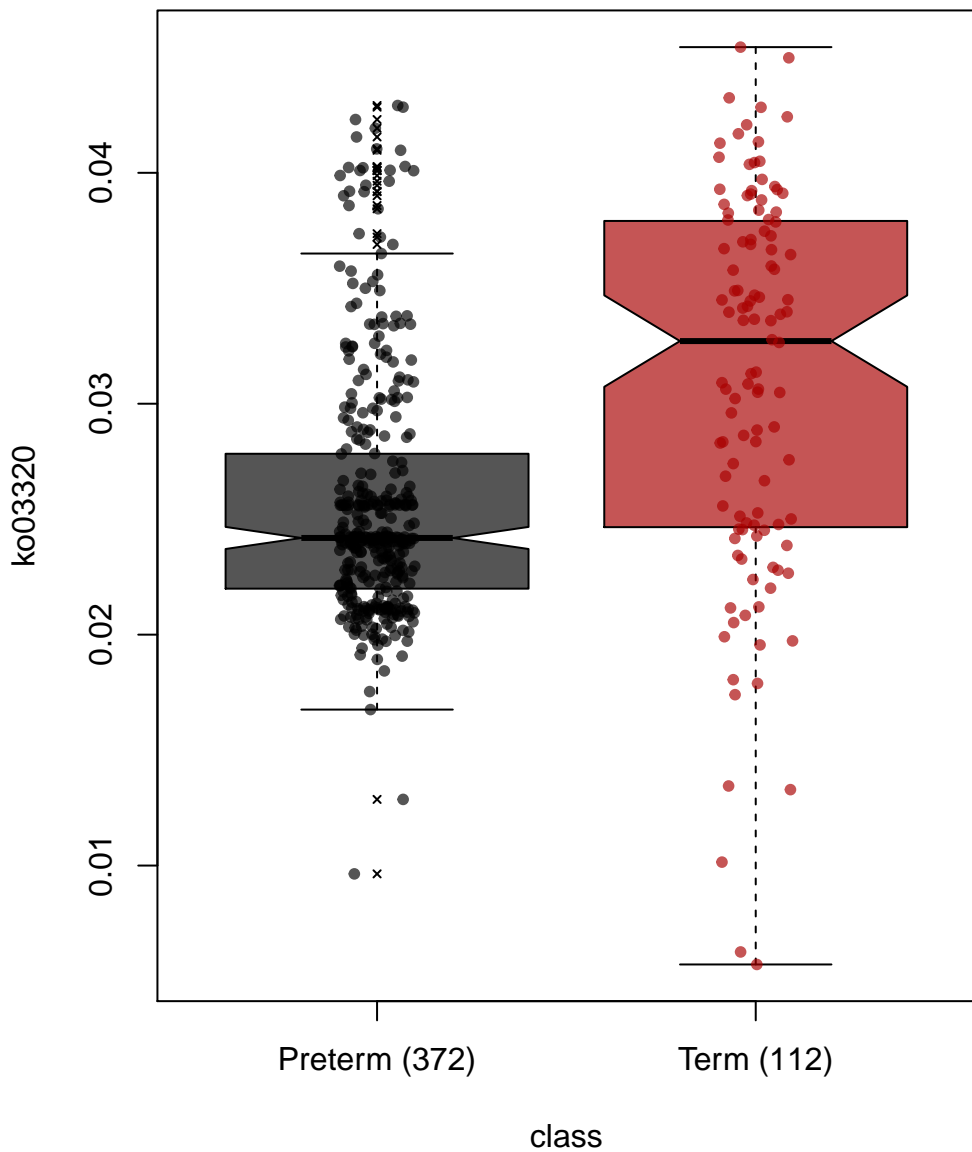

Partial Residual Plot

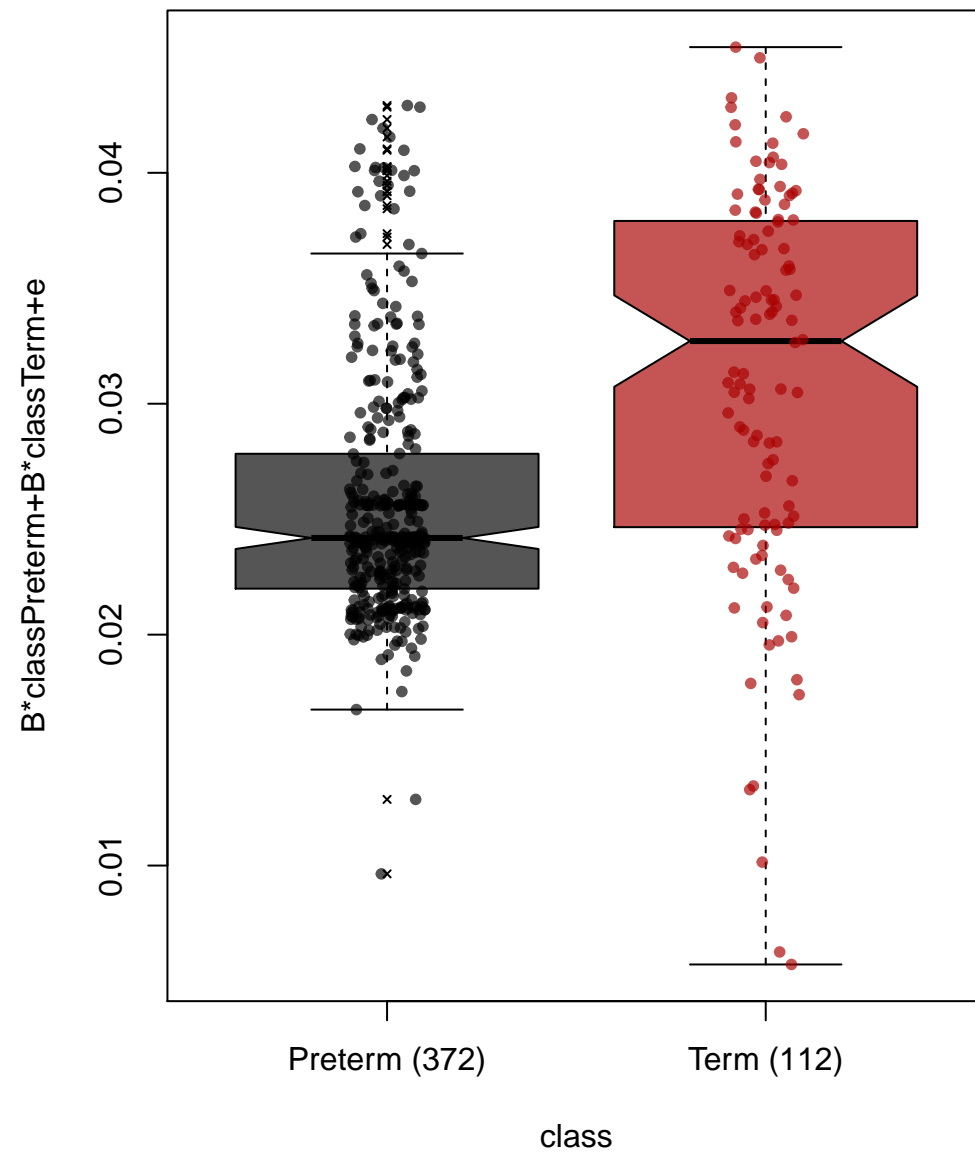

classTerm (0.012 sd 0.00156, p=9.98e-14, q=4.04e-13)

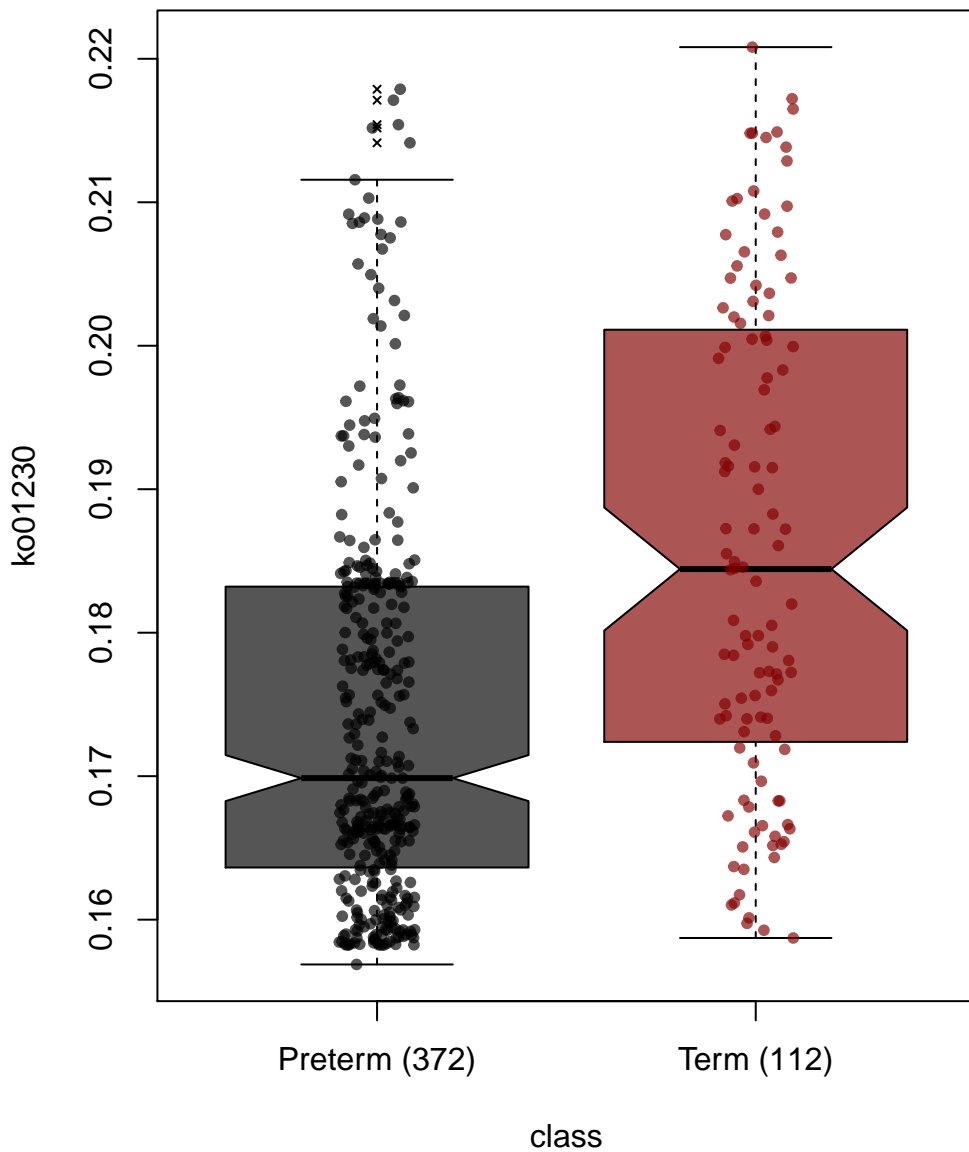

Partial Residual Plot

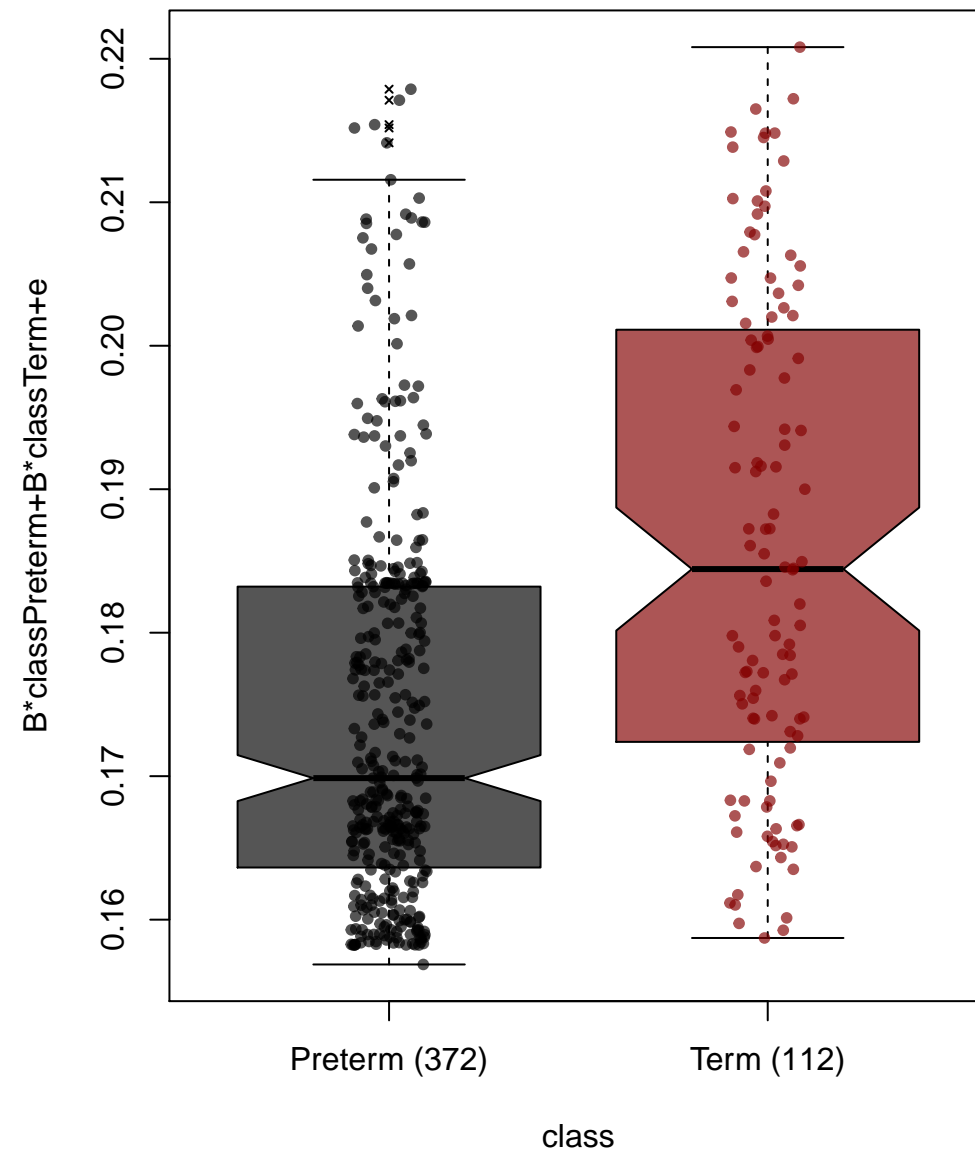

classTerm ( $-0.0103$  sd  $0.00134$ ,  $p=1.06e-13$ ,  $q=4.23e-13$ )

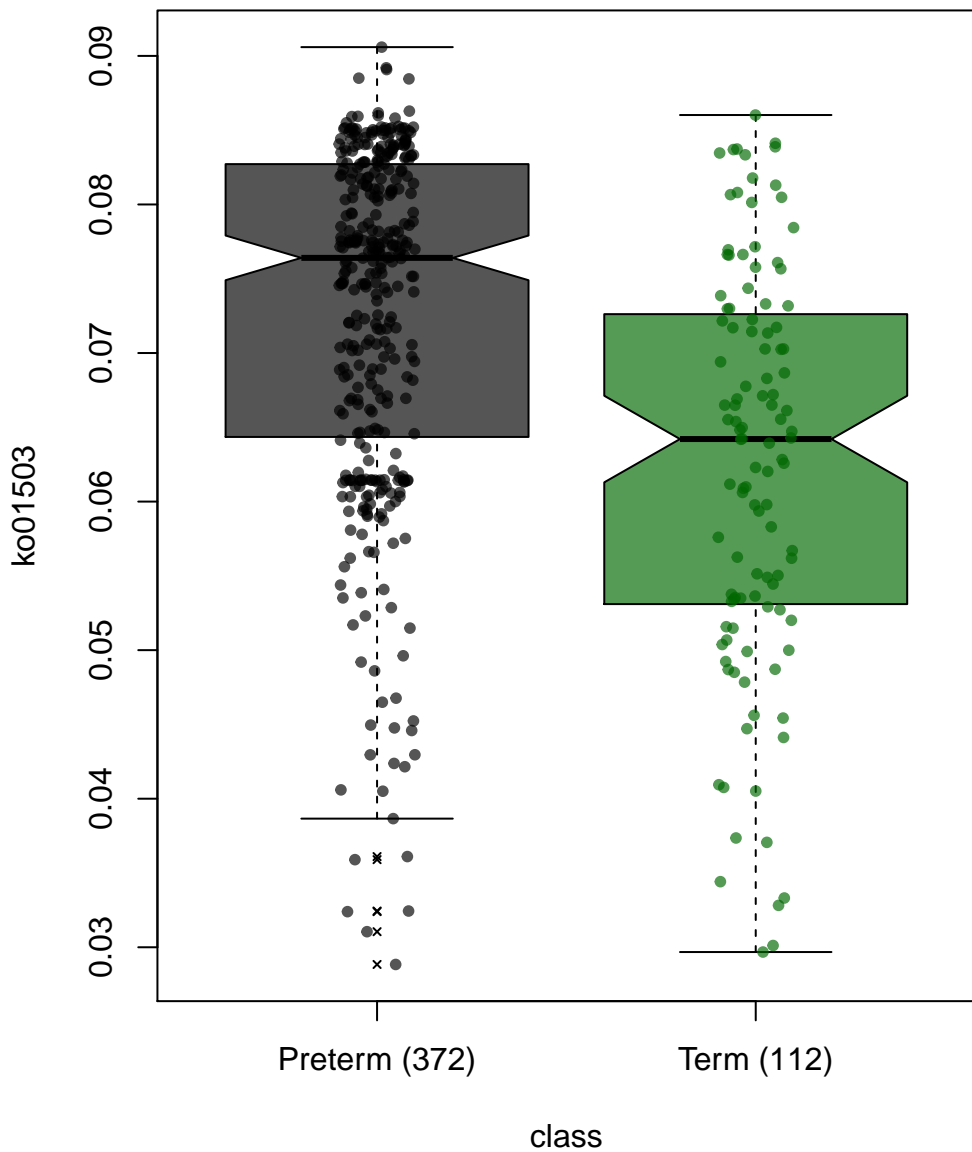

Partial Residual Plot

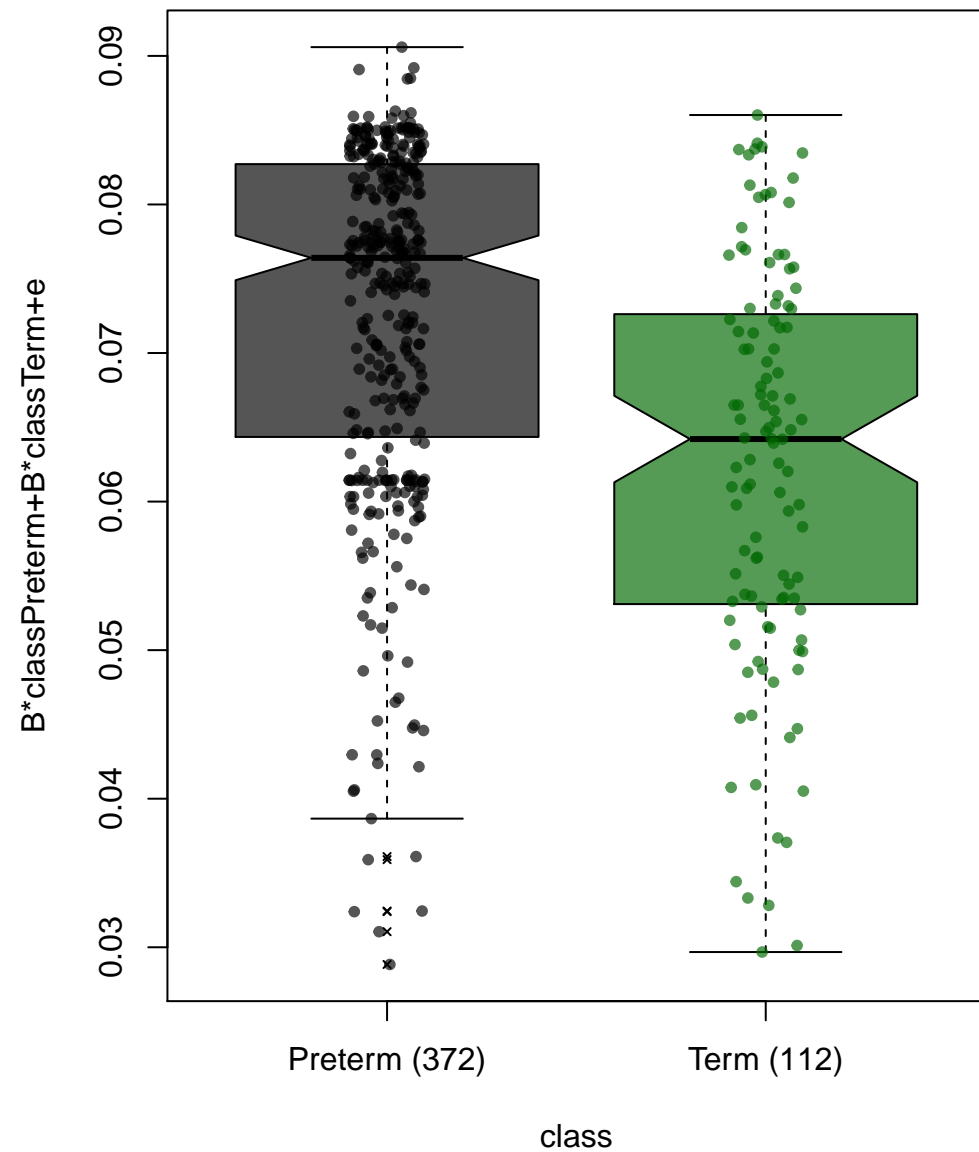

classTerm (0.00367 sd 0.00048, p=1.12e-13, q=4.39e-13)

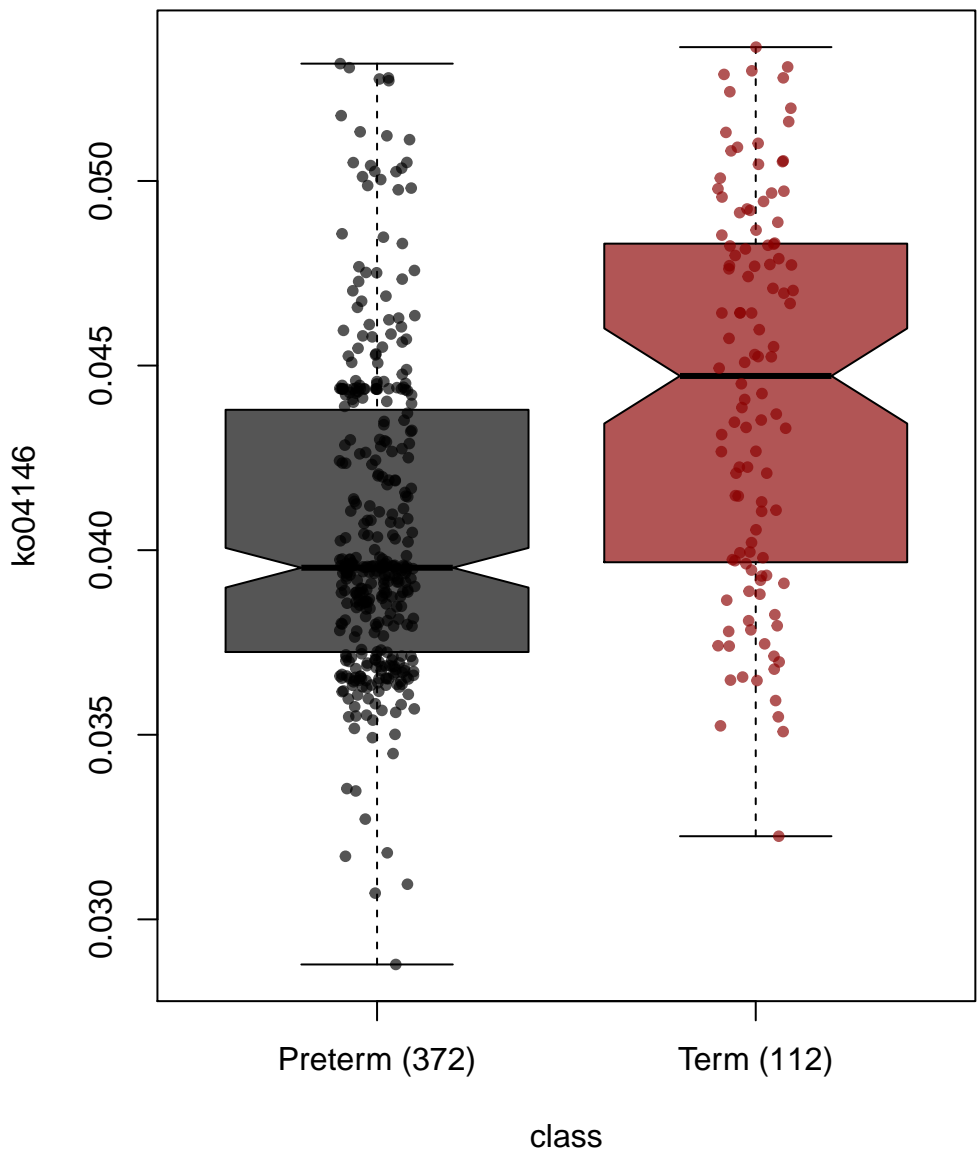

Partial Residual Plot

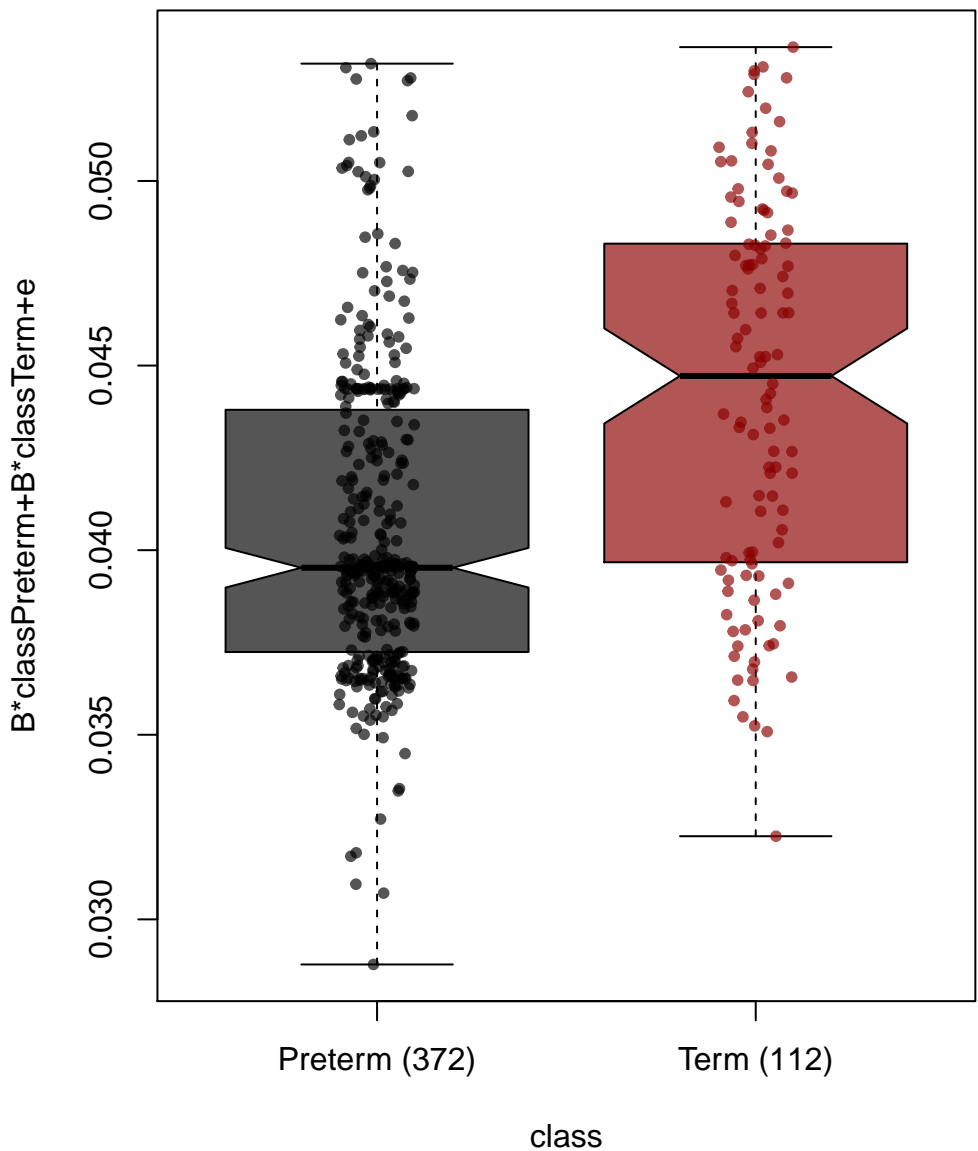

classTerm (0.00902 sd 0.00118, p=1.23e-13, q=4.78e-13)

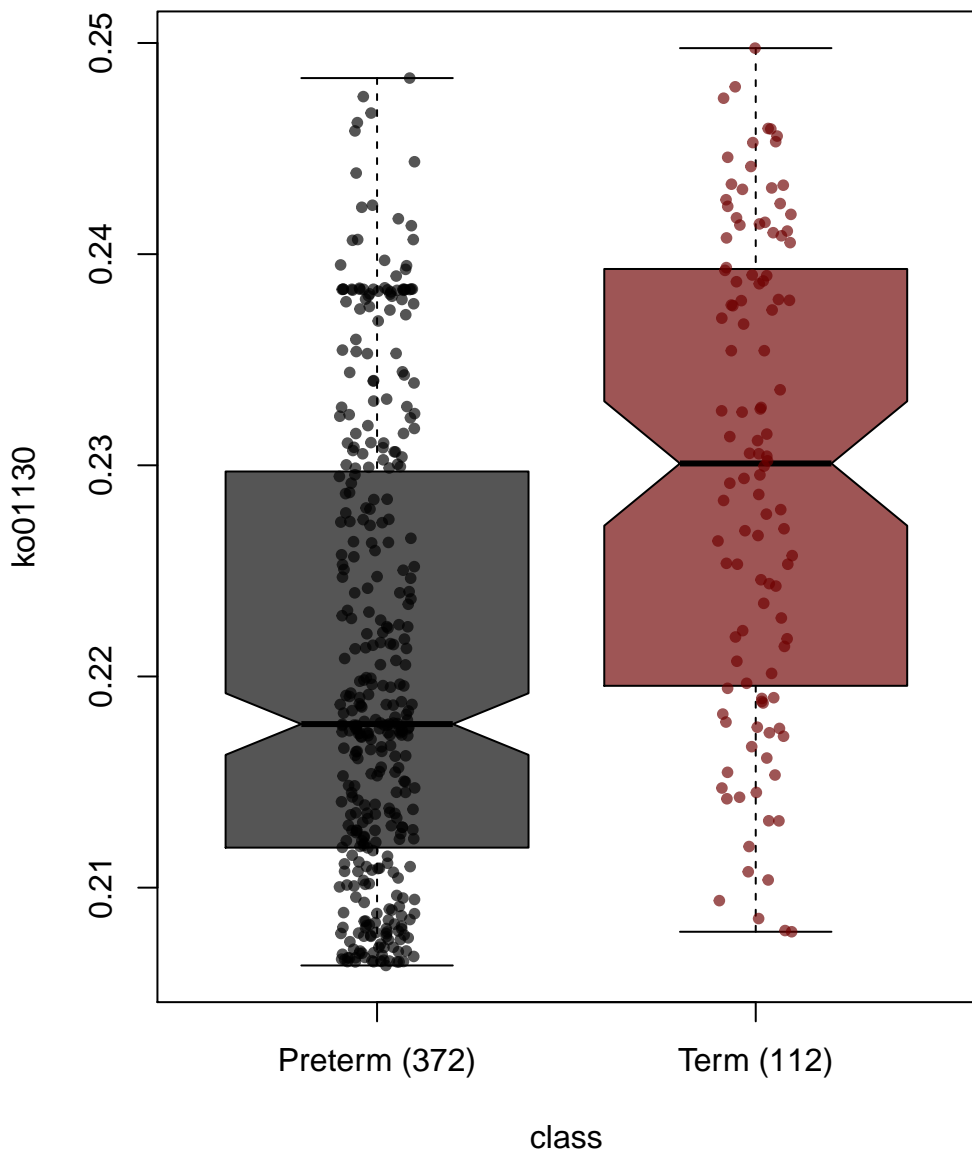

Partial Residual Plot

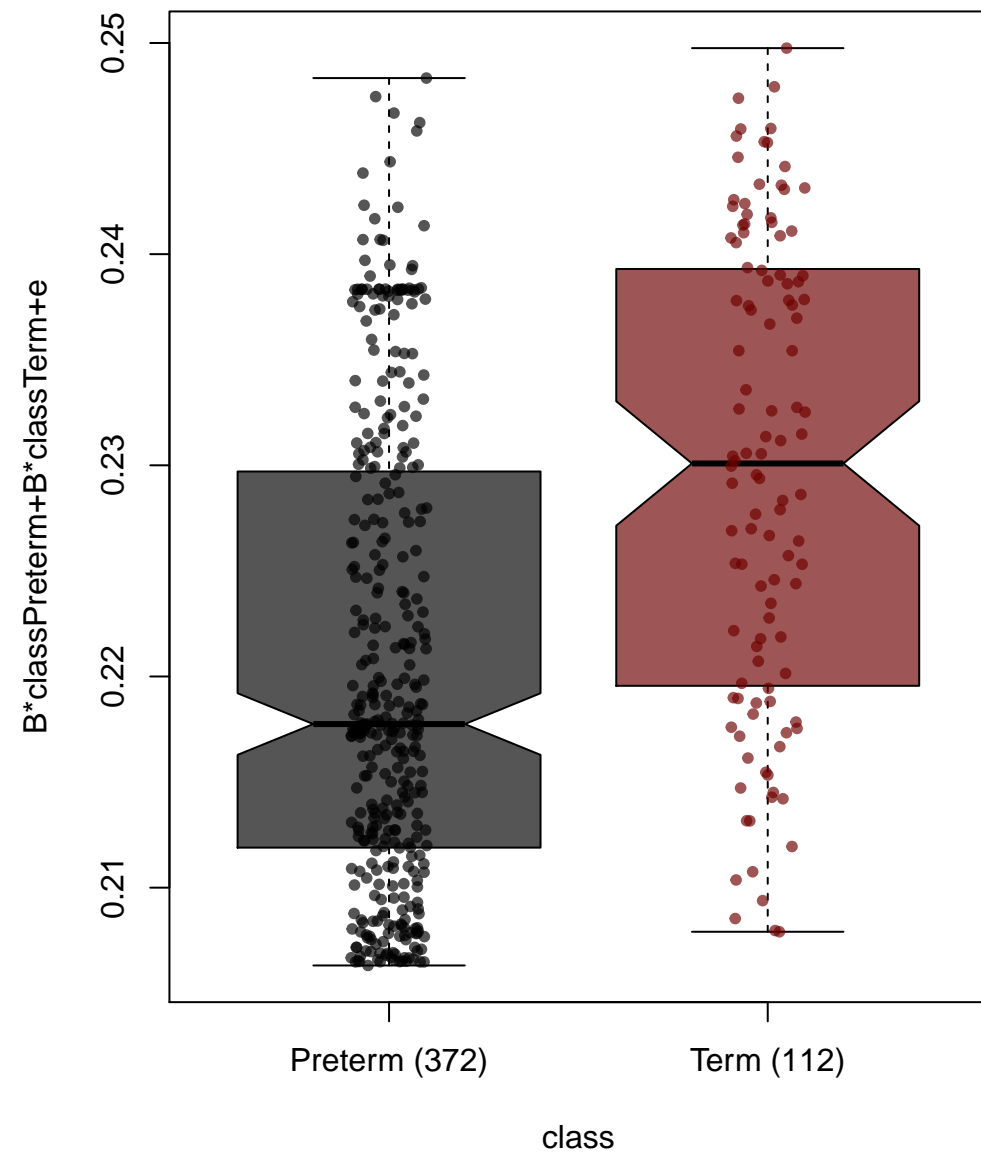

classTerm (0.0024 sd 0.000316, p=1.41e-13, q=5.38e-13)

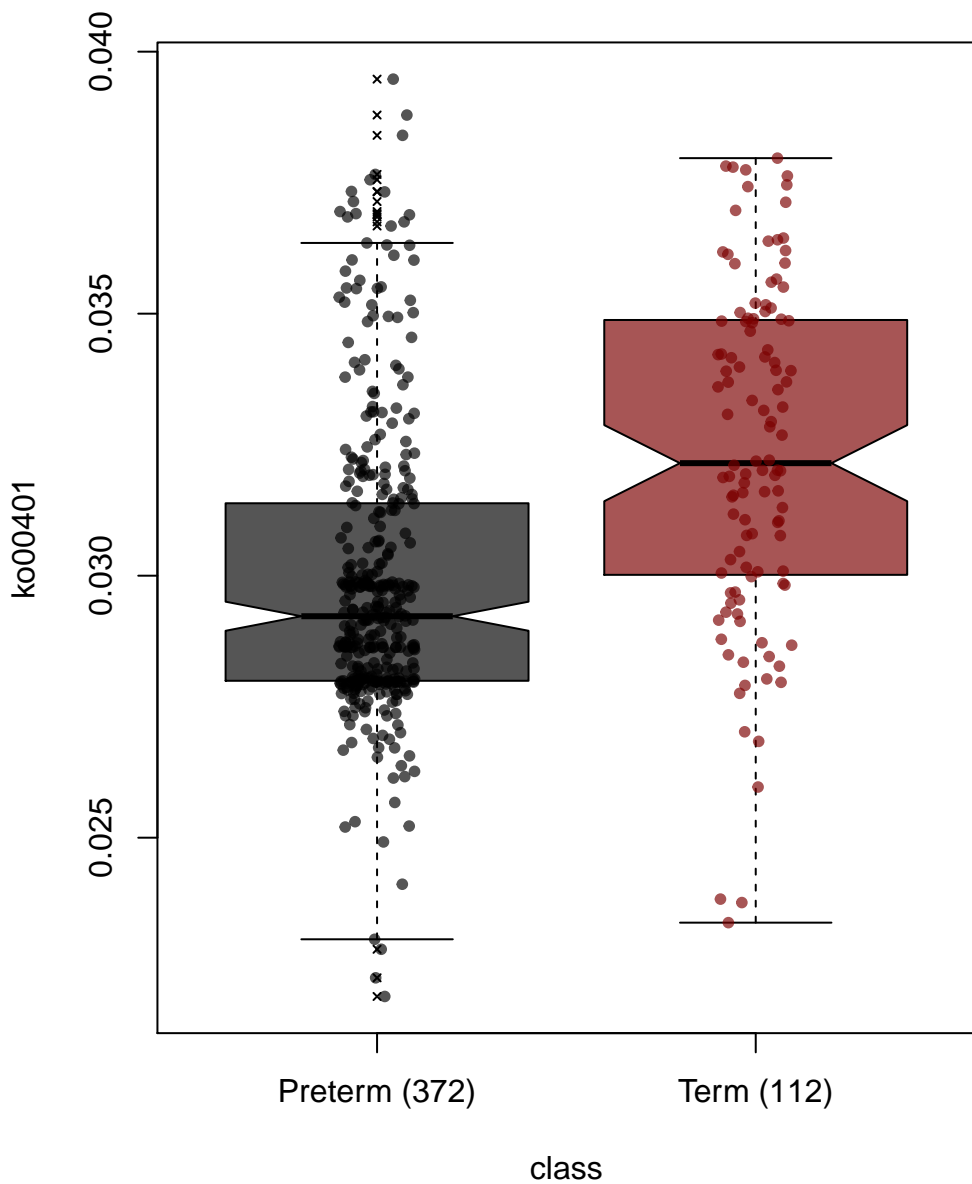

Partial Residual Plot

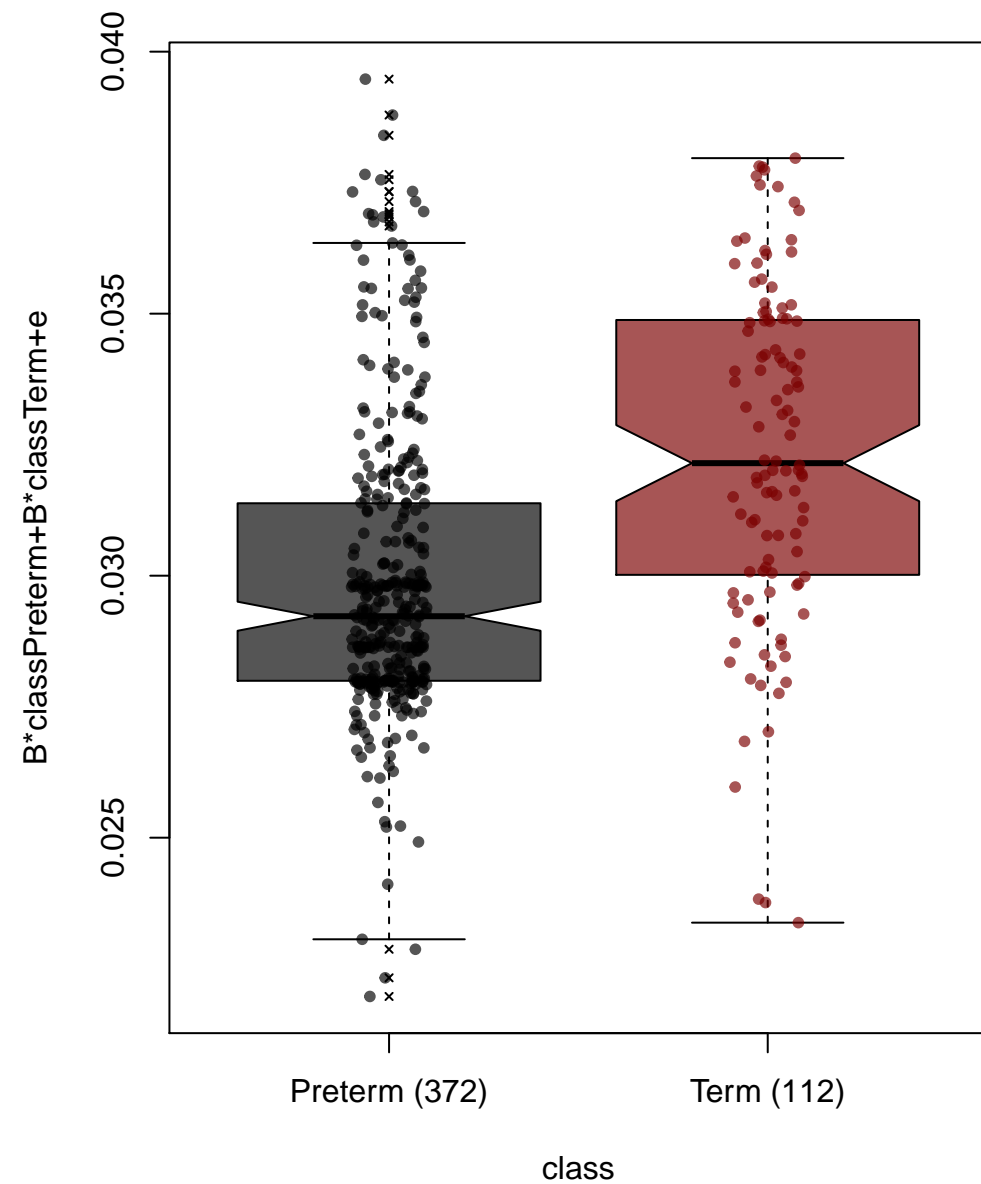

classTerm (0.00648 sd 0.000857, p=1.98e-13, q=7.45e-13)

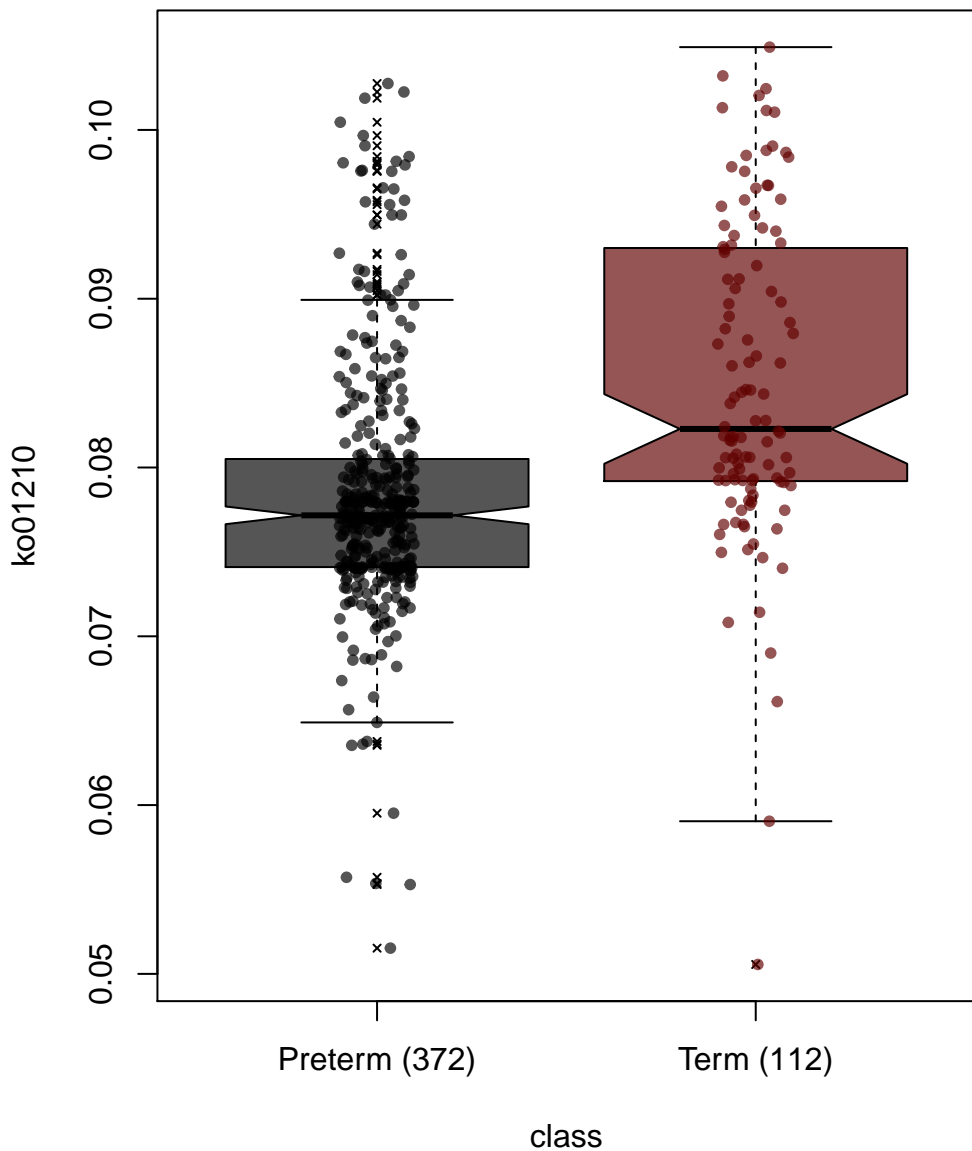

Partial Residual Plot

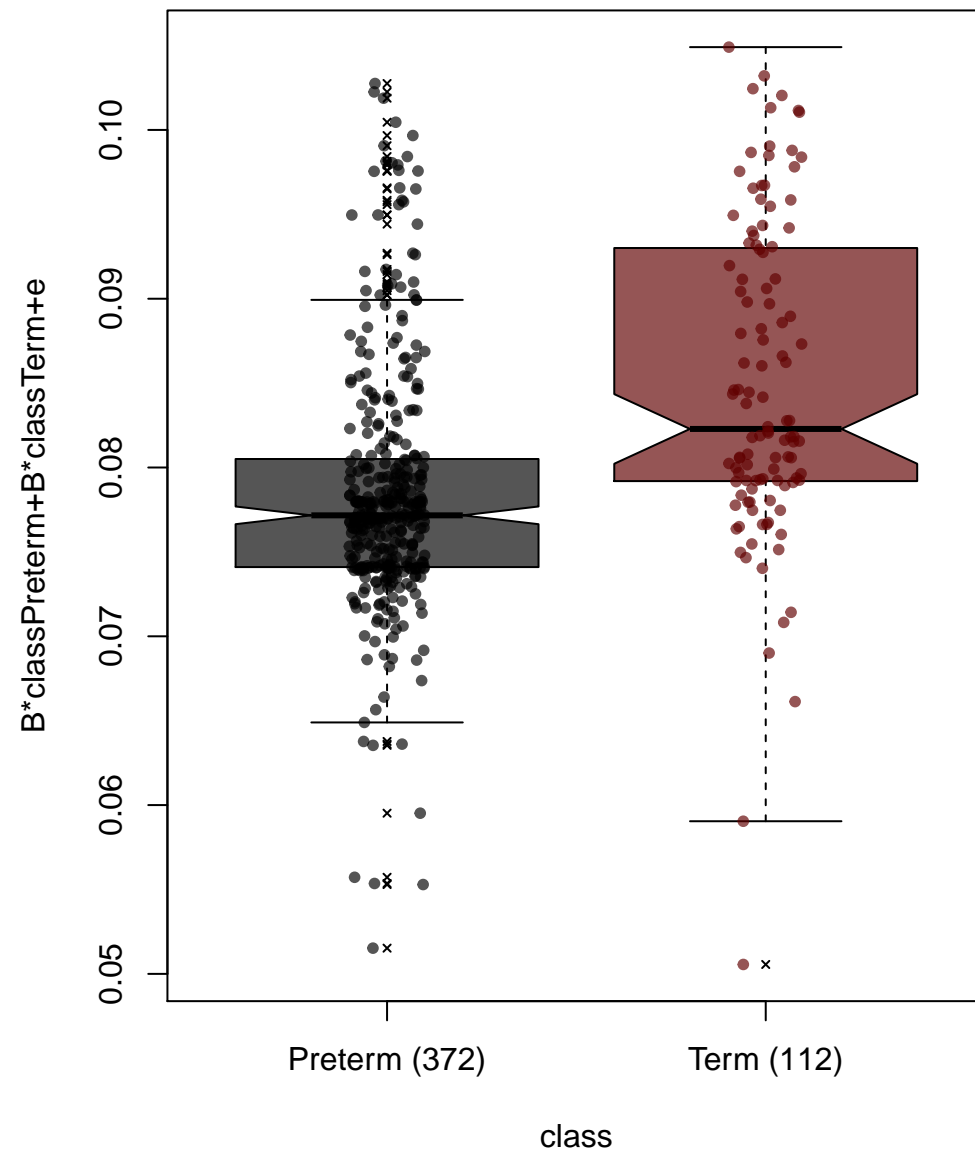

classTerm (−0.00729 sd 0.000969, p=2.63e−13, q=9.78e−13)

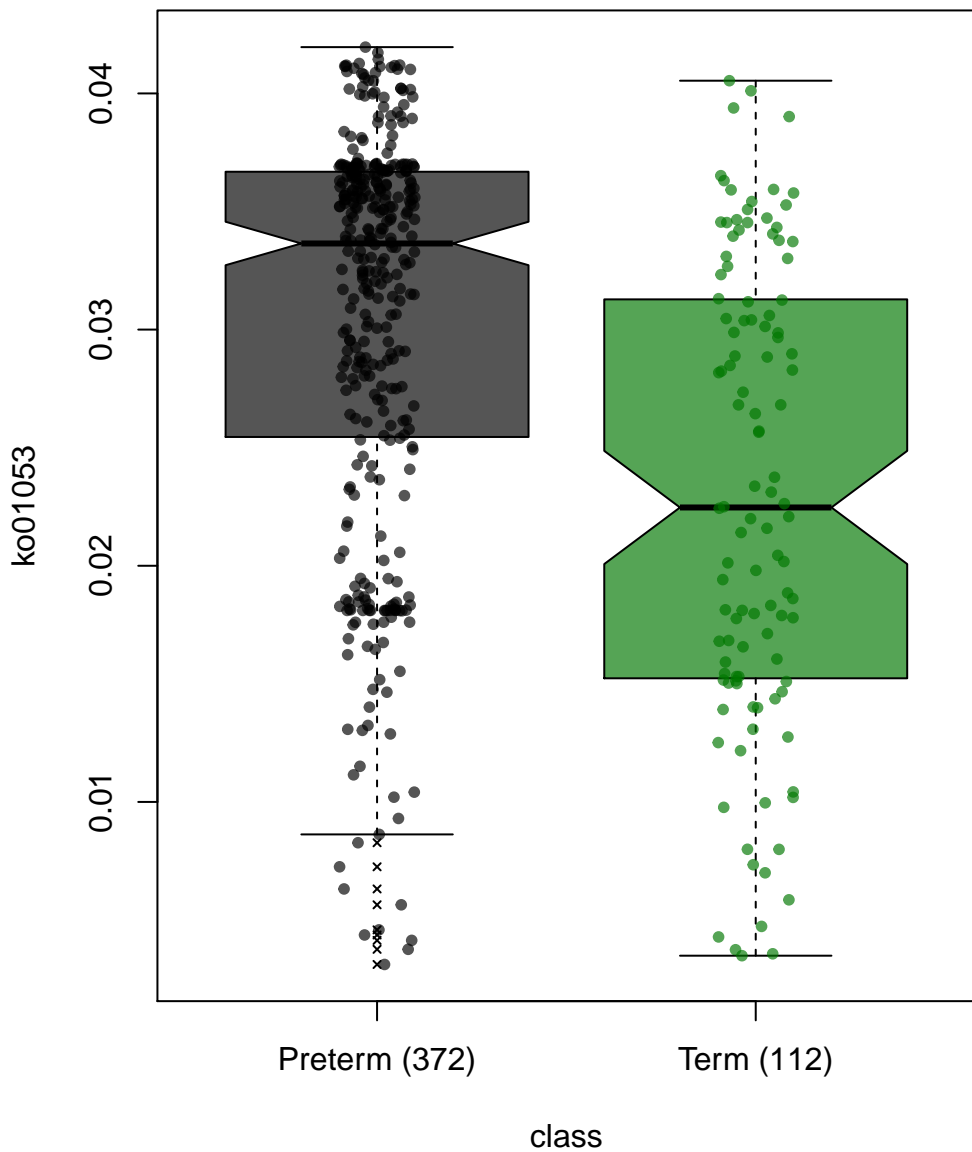

Partial Residual Plot

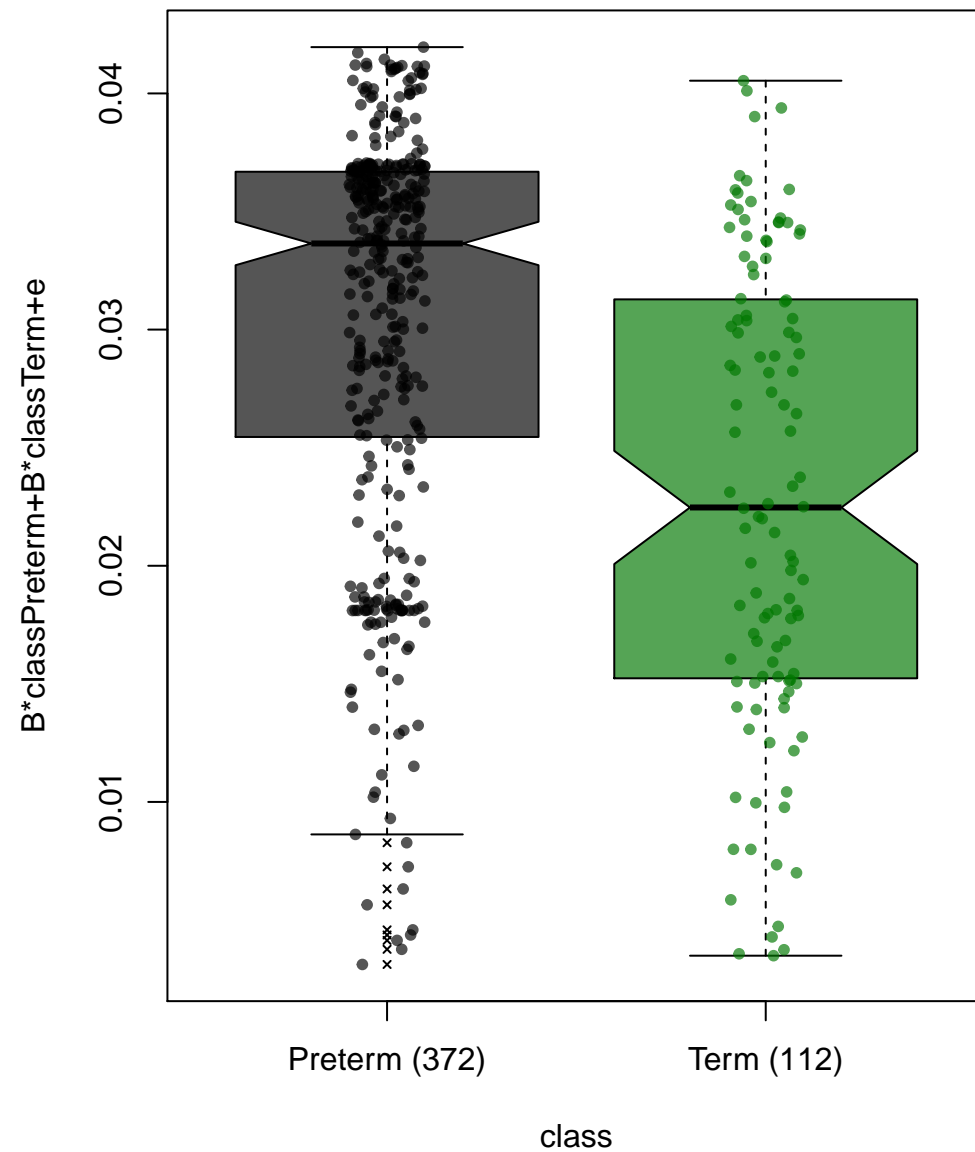



classTerm (0.00455 sd 0.00063, p=2.02e-12, q=7.42e-12)

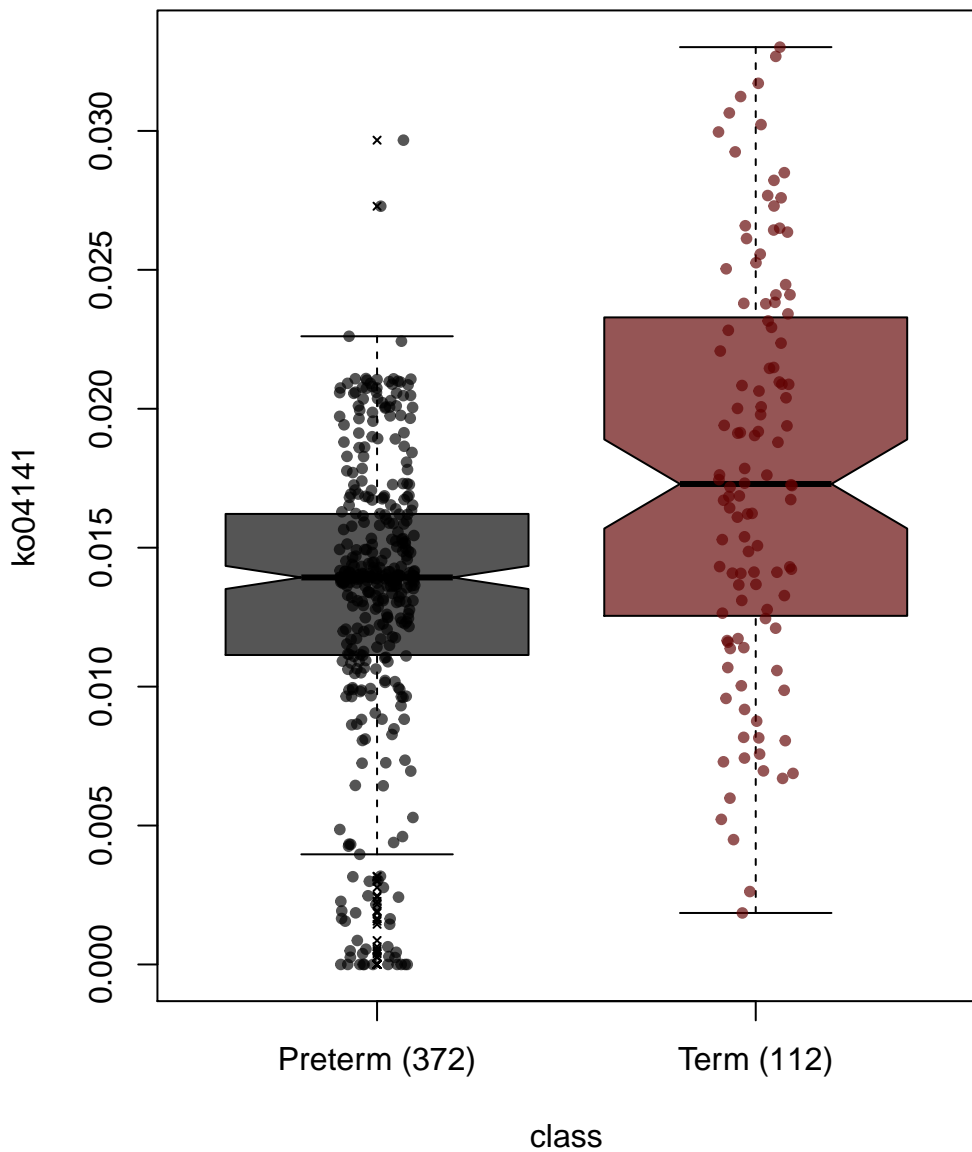

Partial Residual Plot

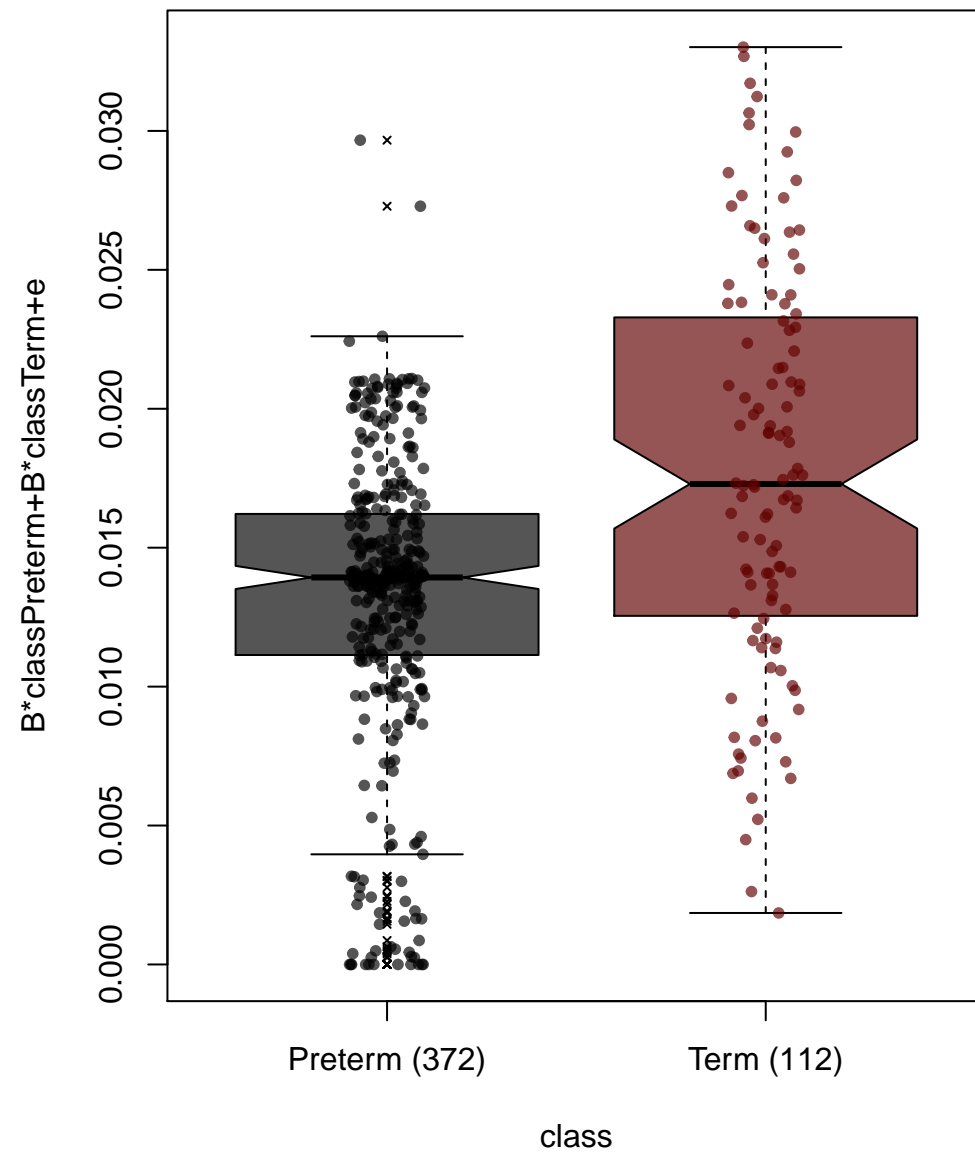

classTerm (0.000484 sd 6.72e-05, p=2.23e-12, q=8.08e-12)

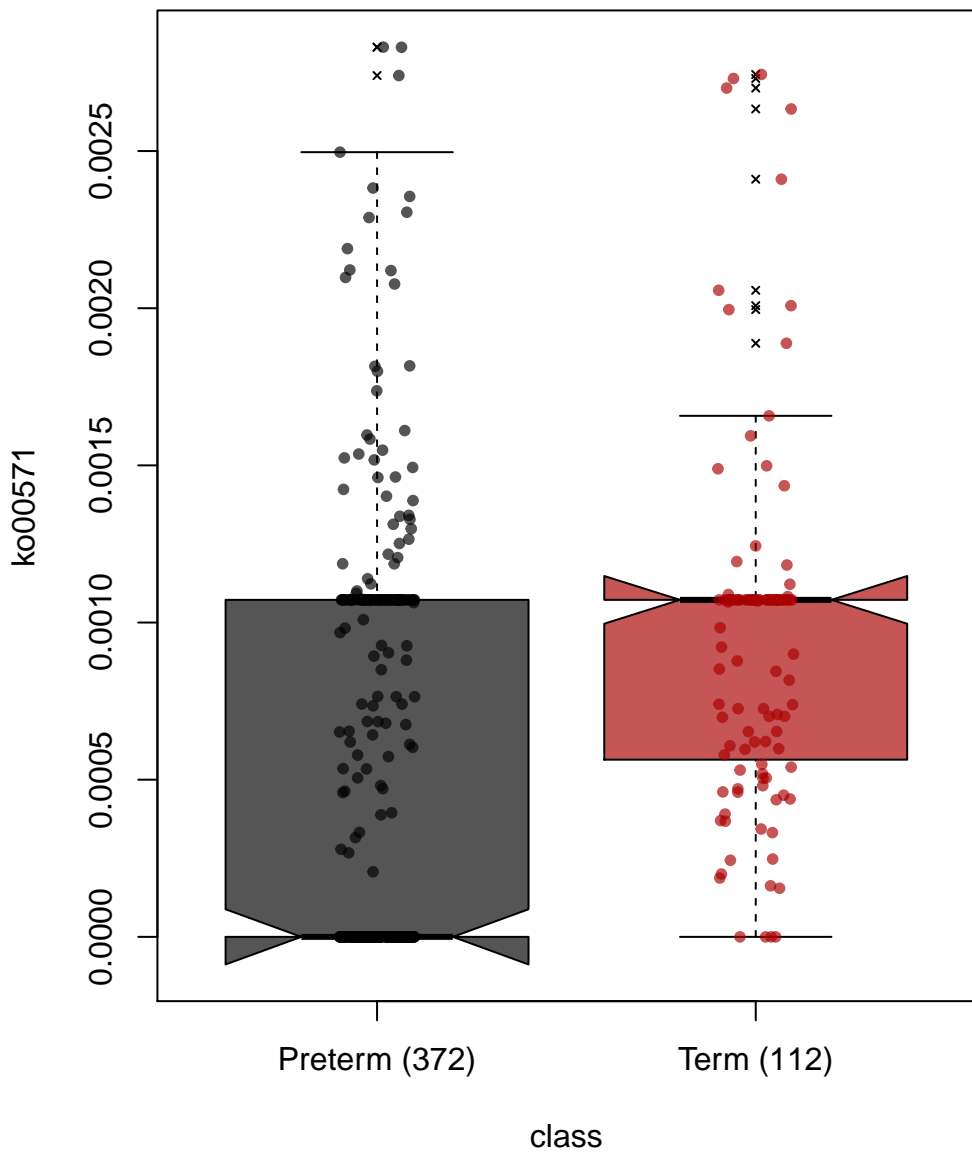

Partial Residual Plot

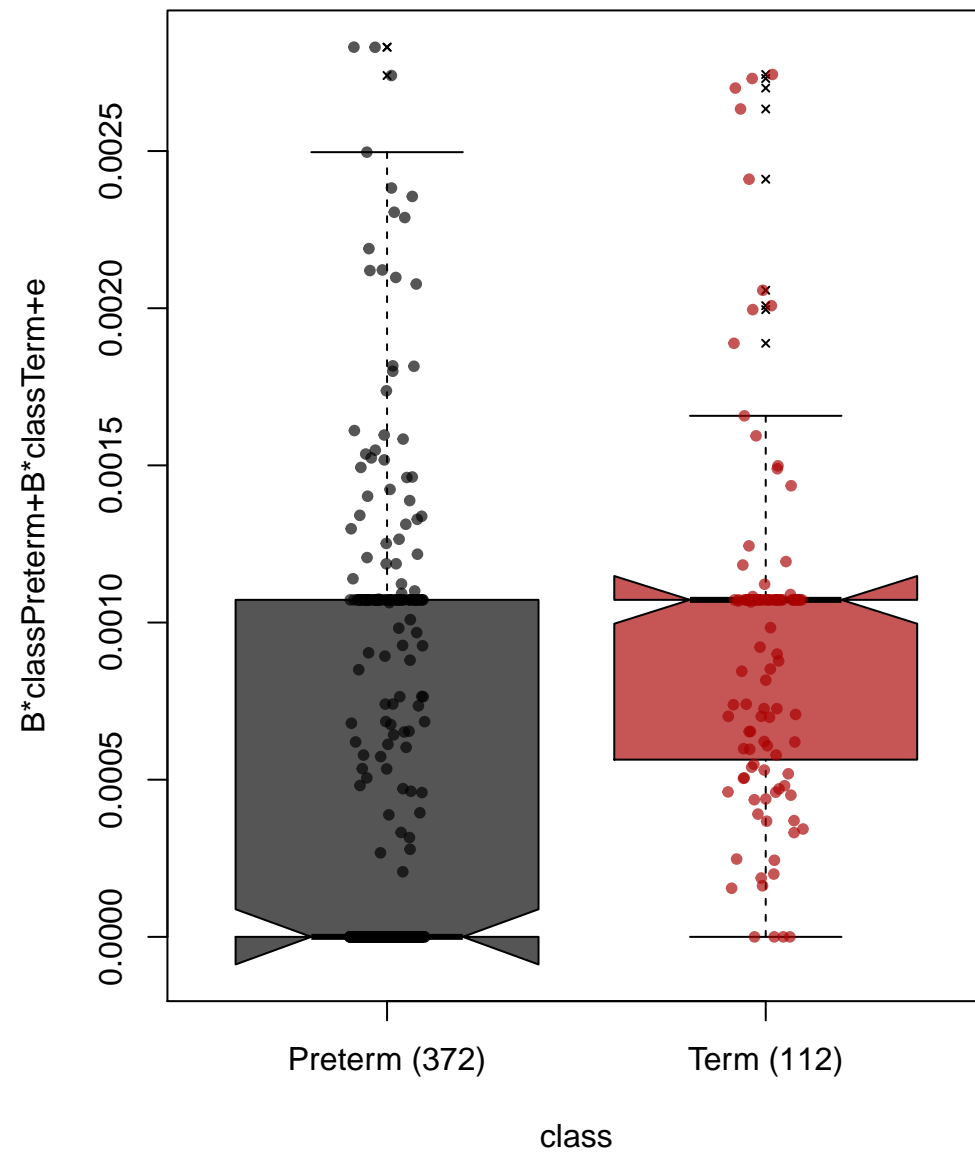

classTerm (0.000258 sd 3.58e-05, p=2.55e-12, q=9.12e-12)

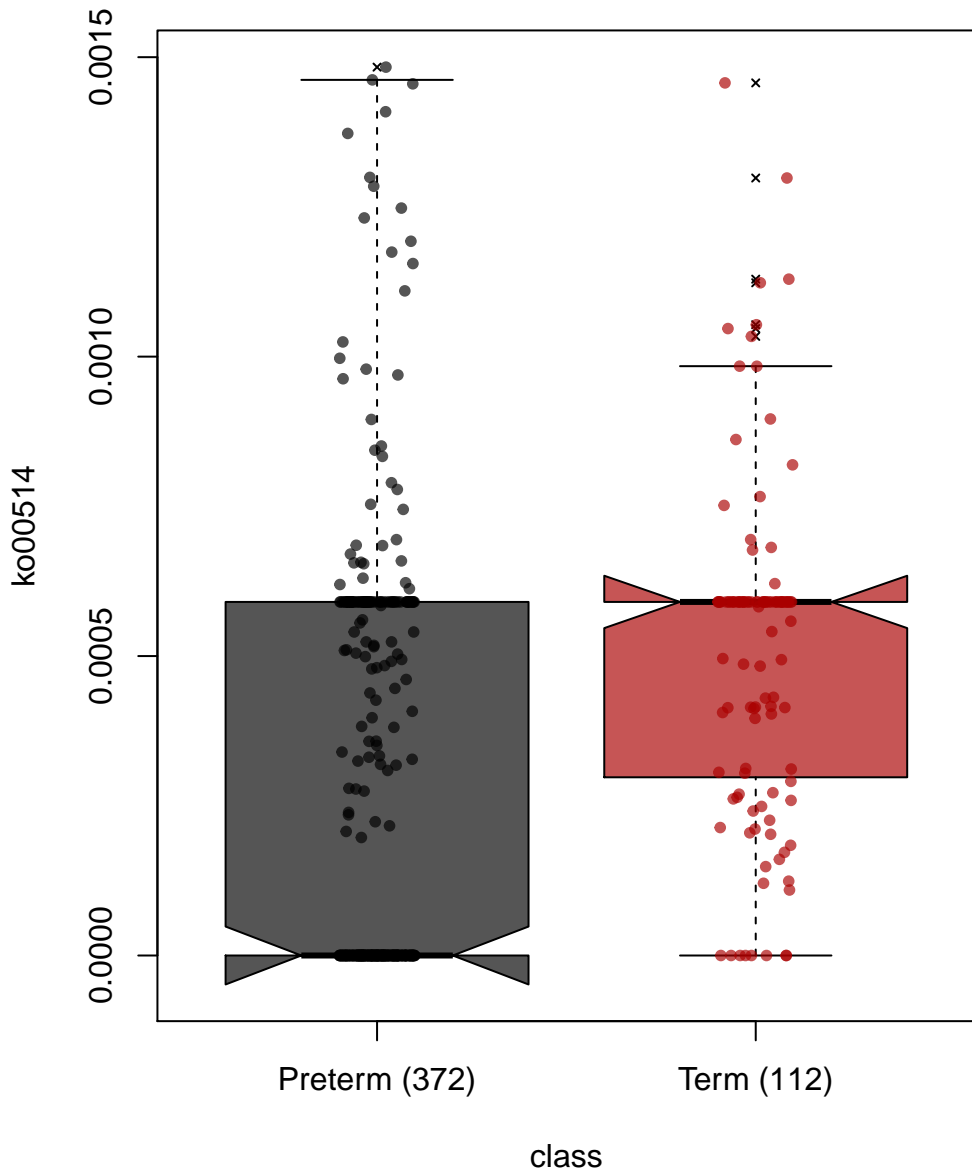

Partial Residual Plot

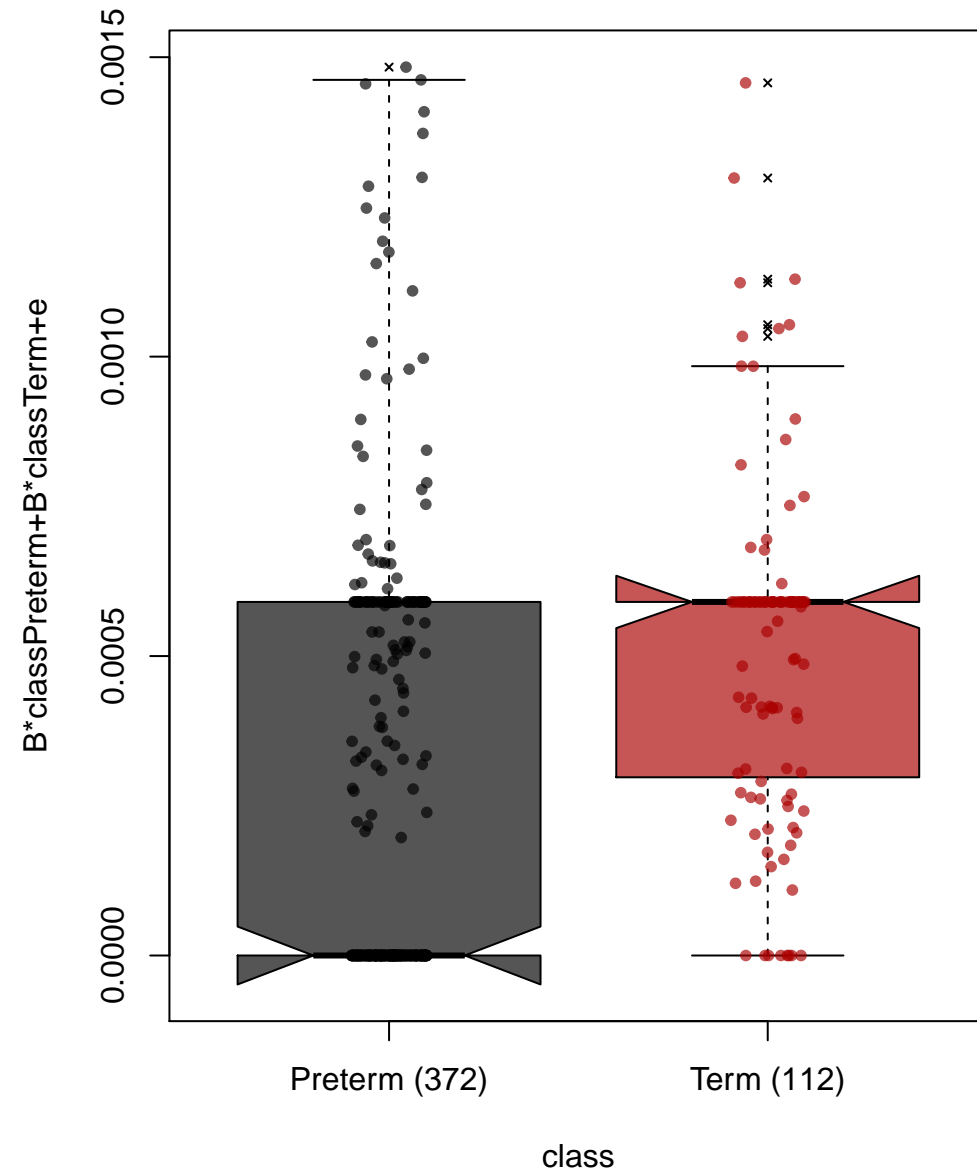

classTerm ( $-0.00797$  sd  $0.00111$ ,  $p=3.13e-12$ ,  $q=1.1e-11$ )

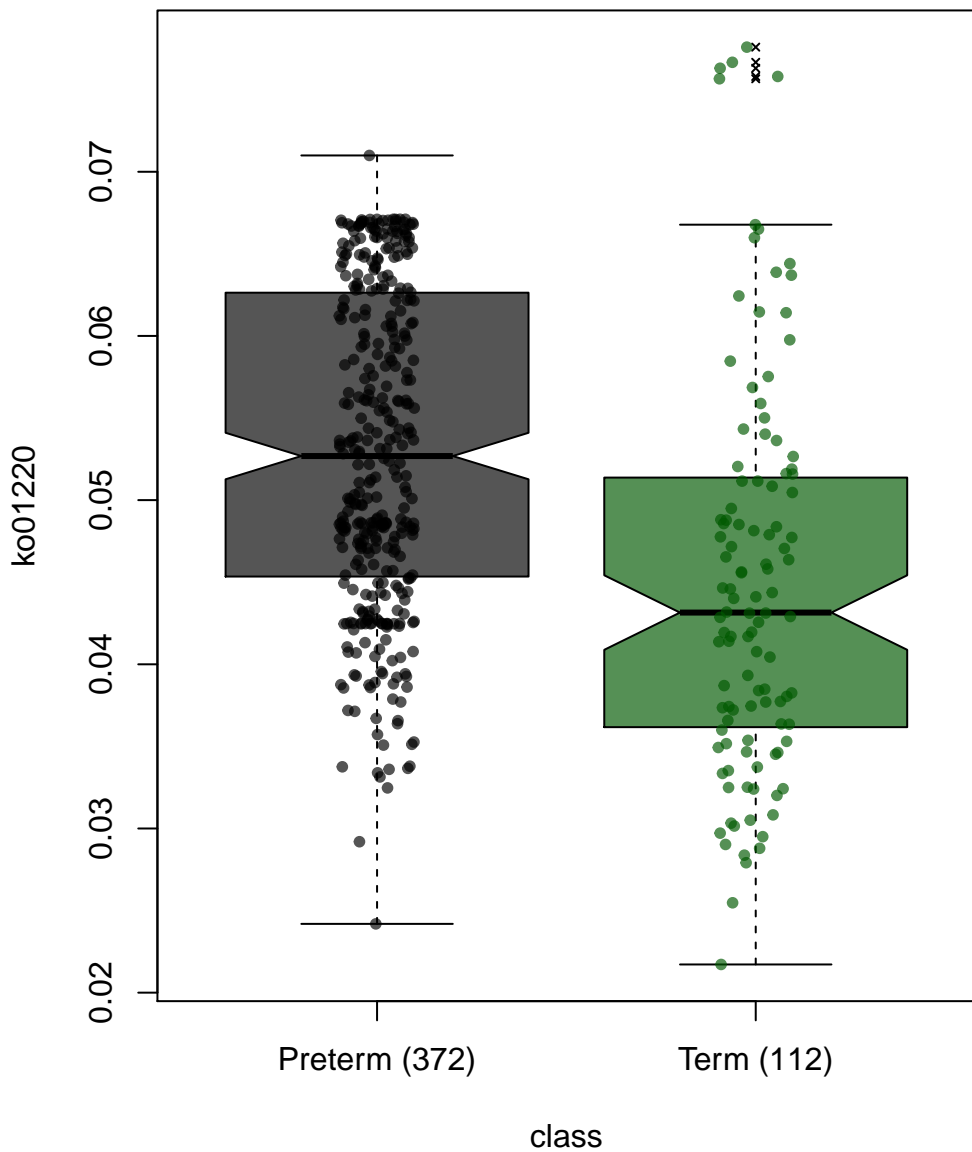

Partial Residual Plot

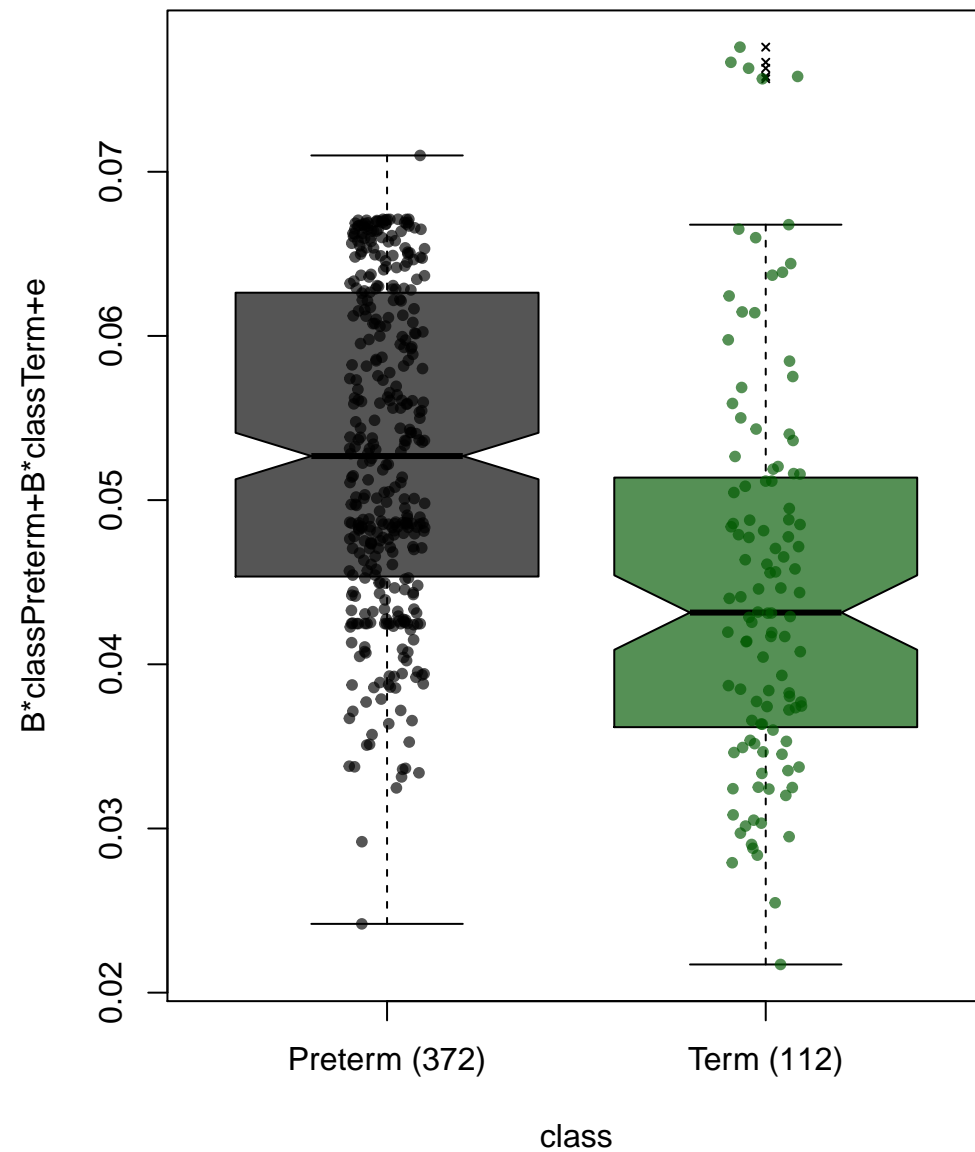

classTerm (0.00618 sd 0.000865, p=3.44e-12, q=1.2e-11)

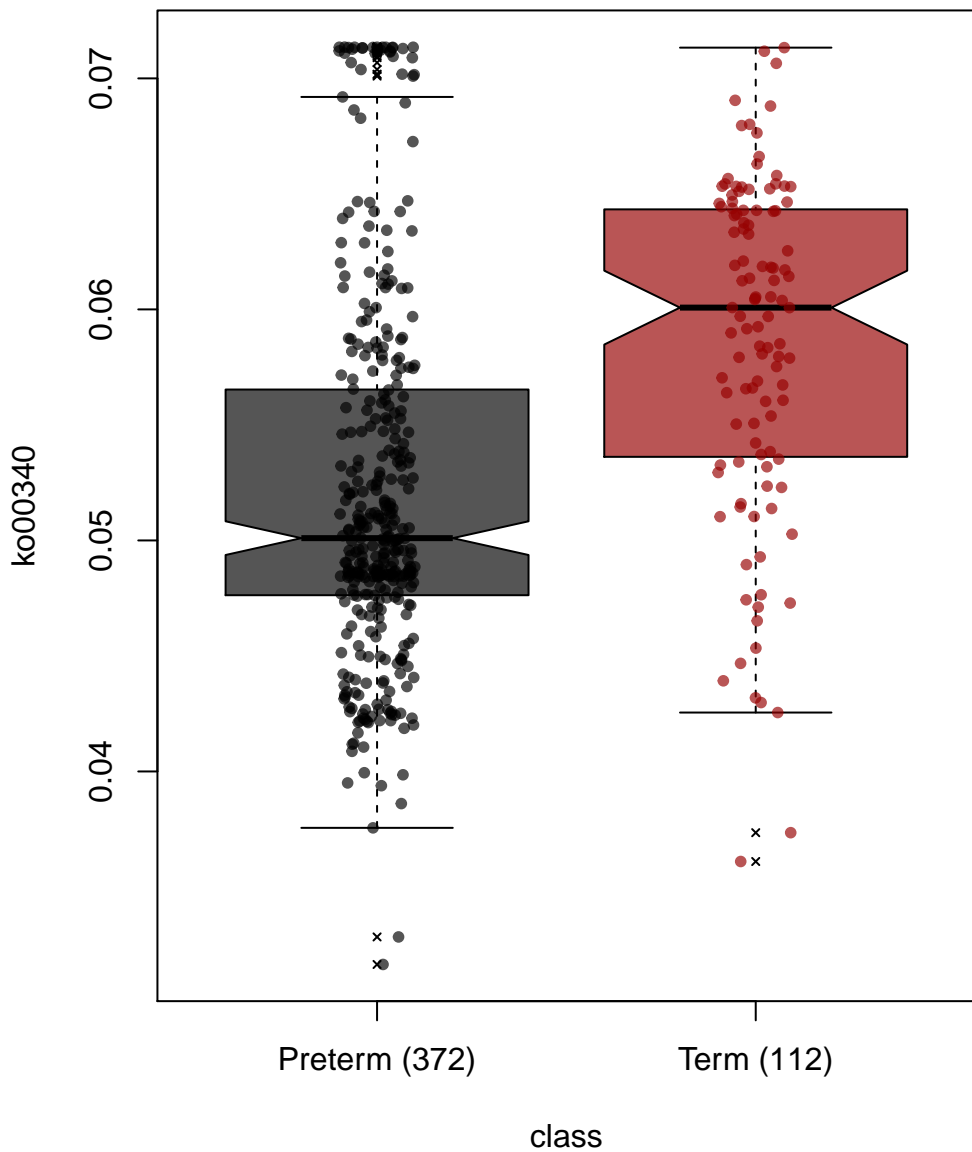

Partial Residual Plot

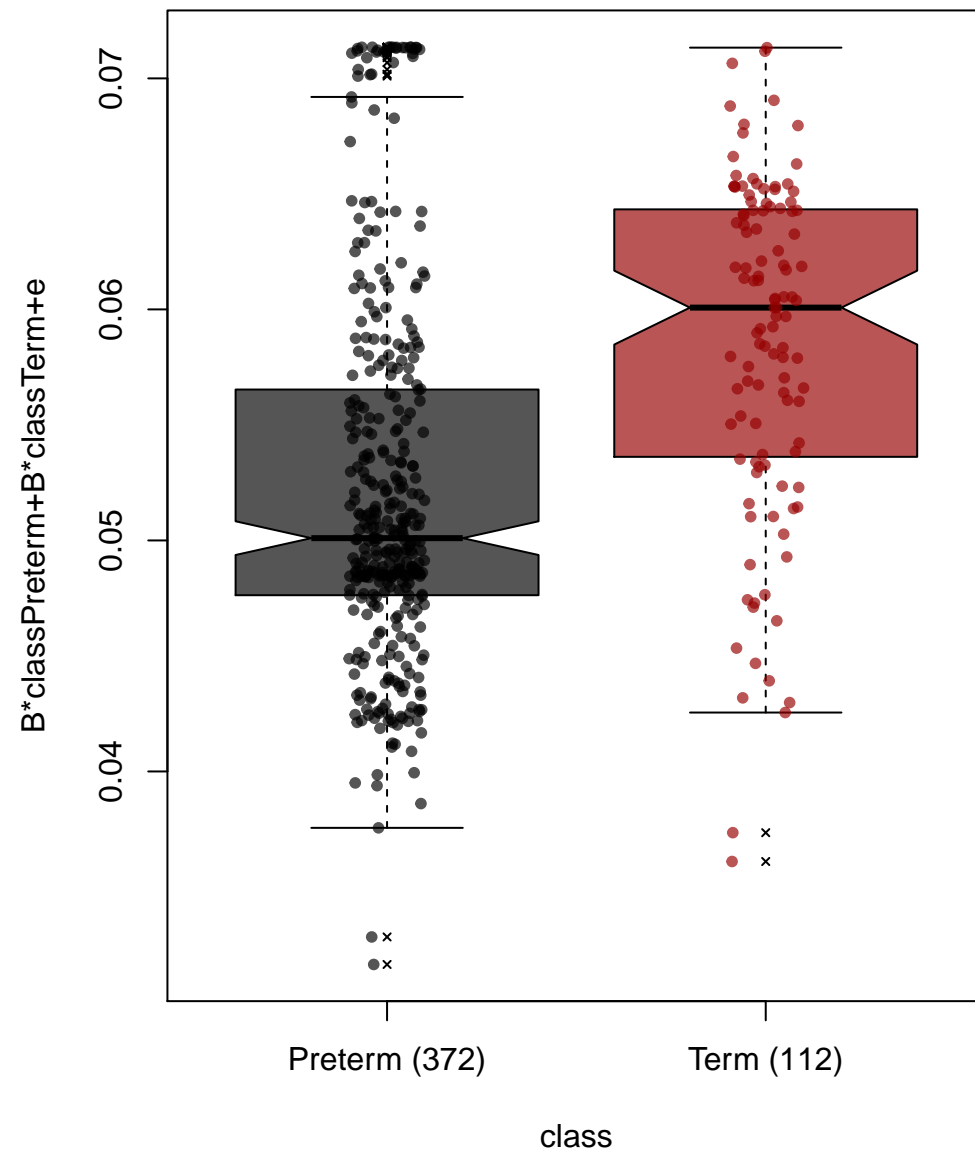

classTerm (0.00556 sd 0.000794, p=8.54e-12, q=2.94e-11)

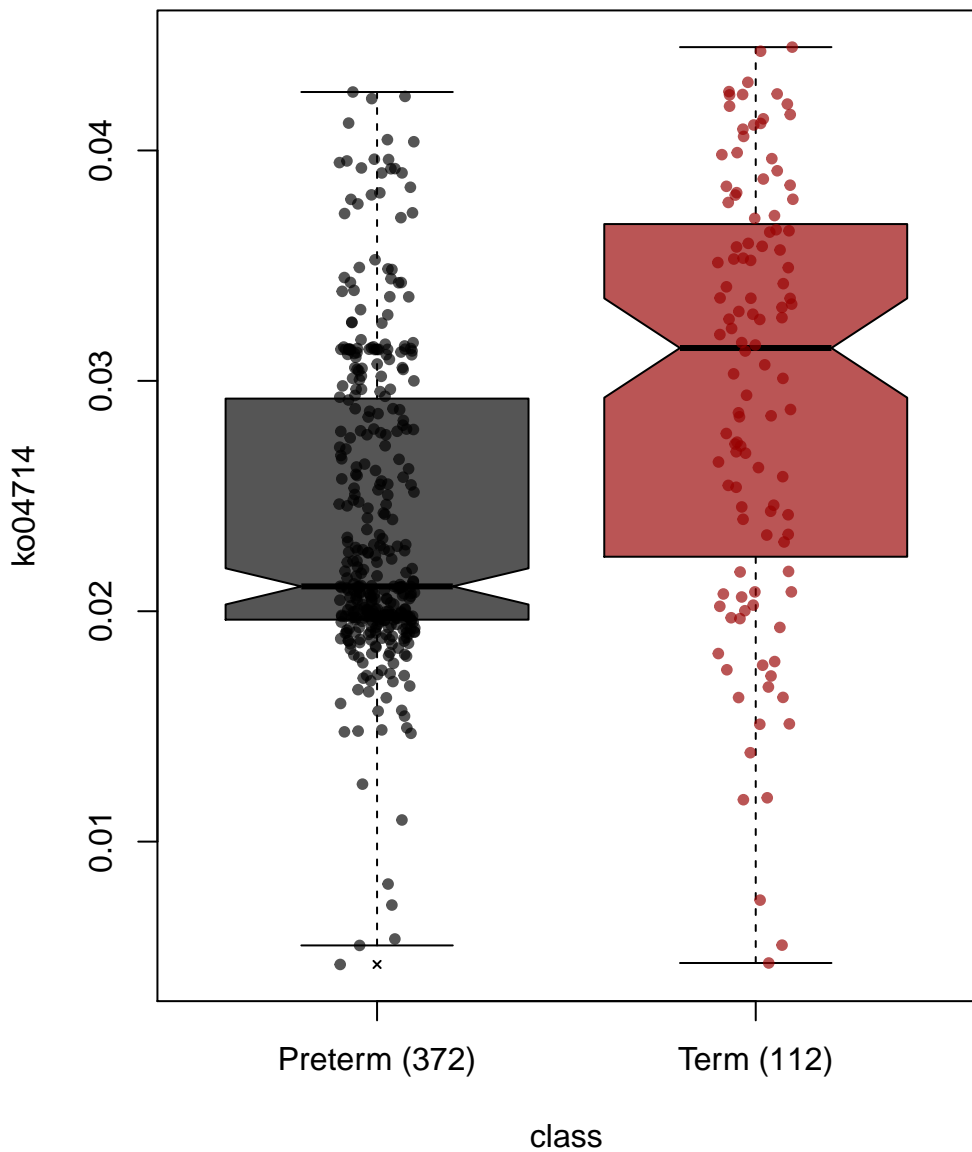

Partial Residual Plot

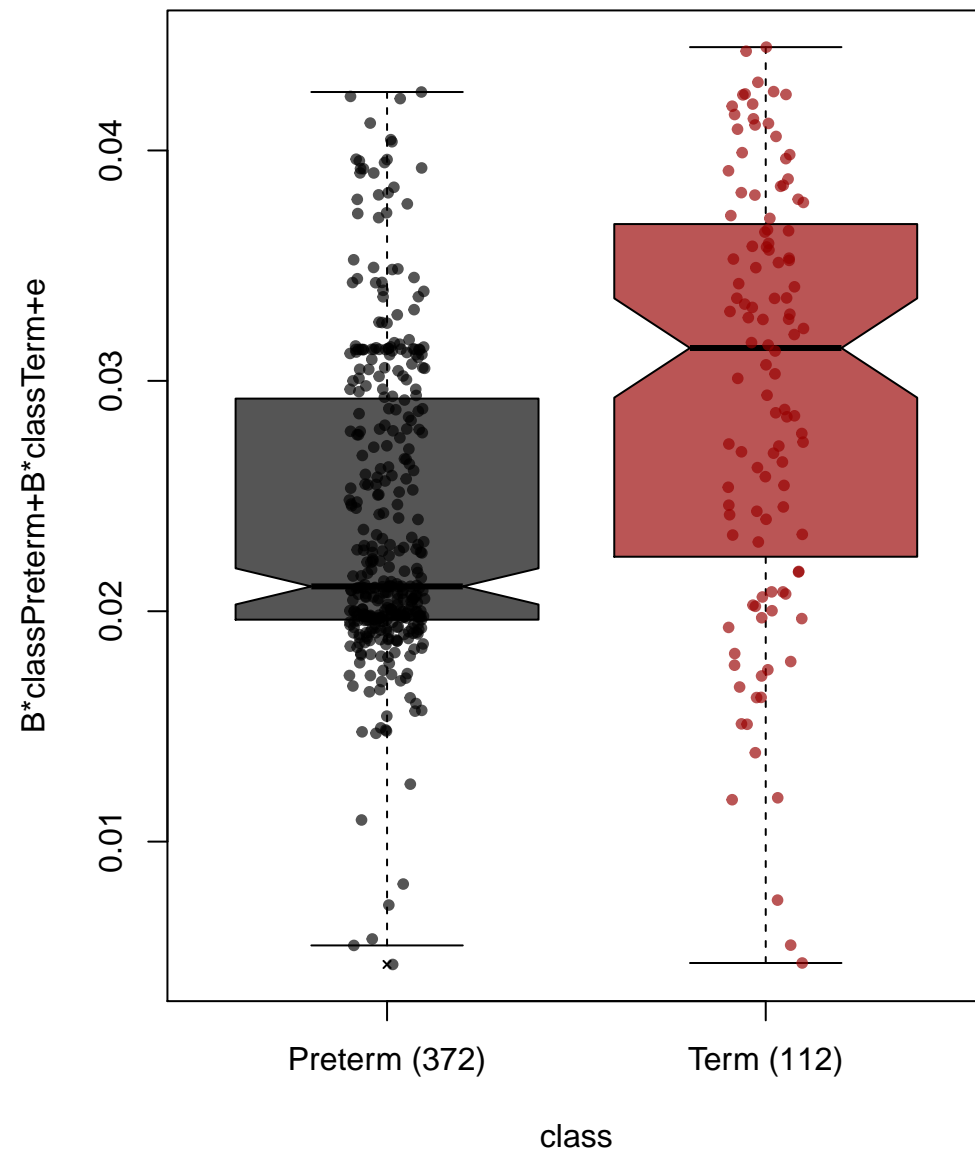

classTerm (0.00499 sd 0.000717, p=1.1e-11, q=3.74e-11)

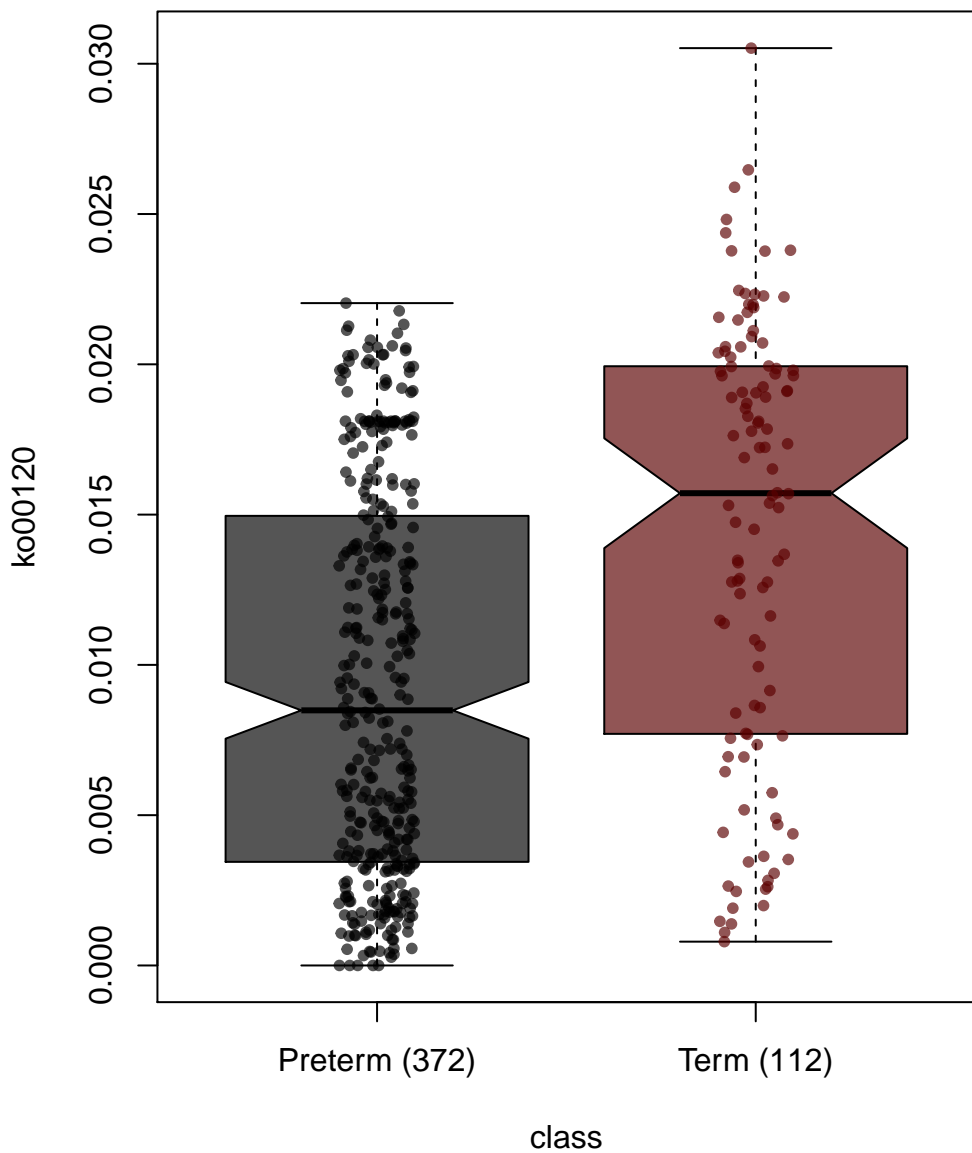

Partial Residual Plot

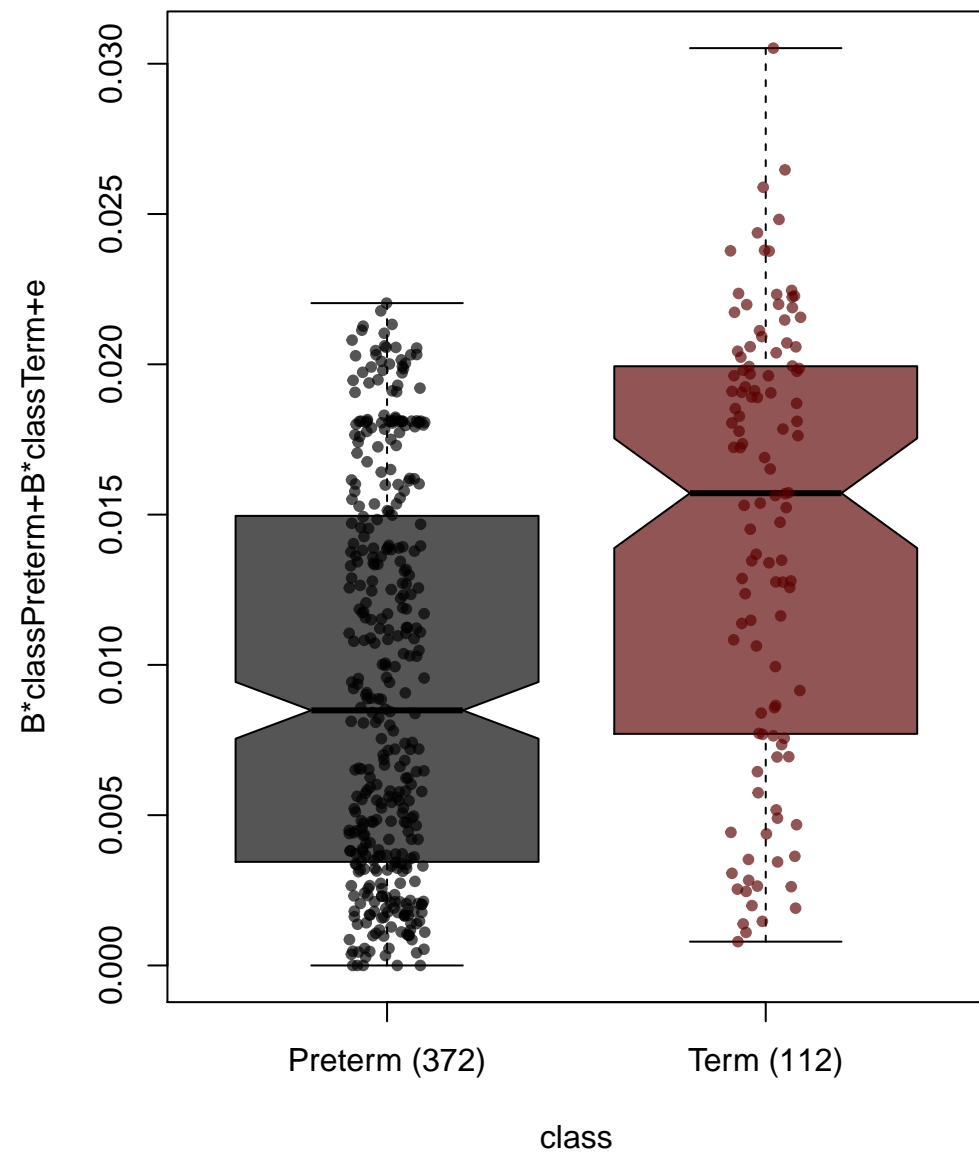

classTerm (0.00429 sd 0.000622, p=1.66e-11, q=5.57e-11)

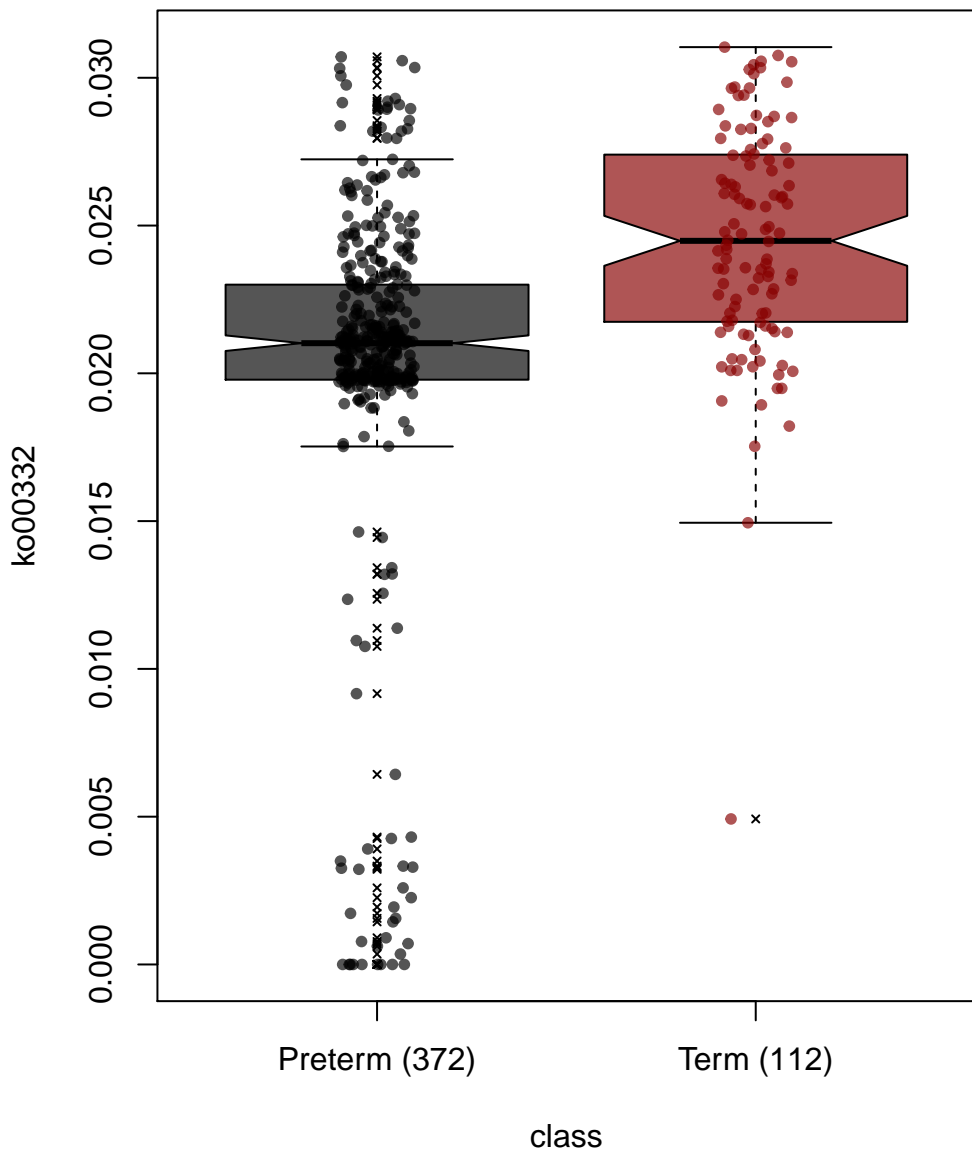

Partial Residual Plot

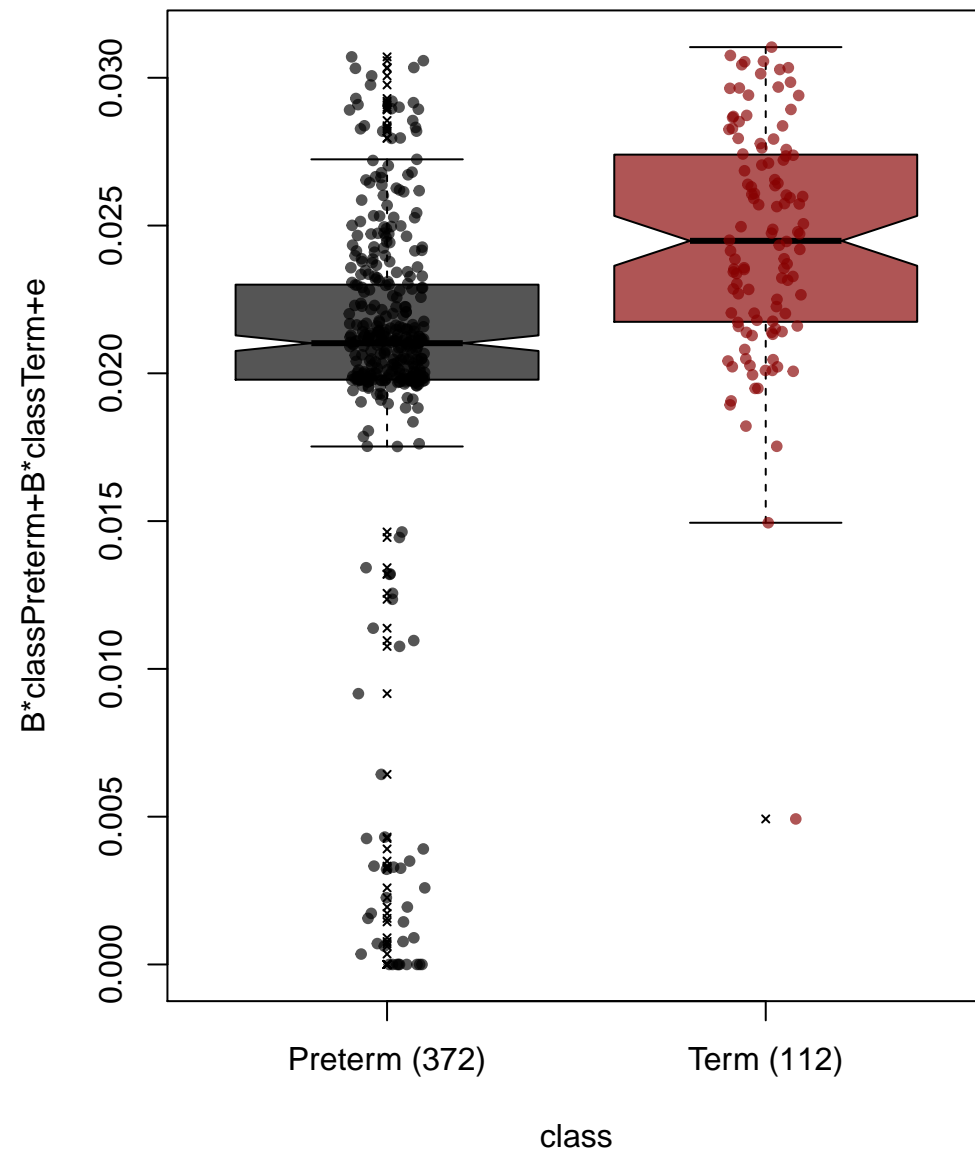



classTerm (−0.00699 sd 0.00101, p=1.73e−11, q=5.76e−11)

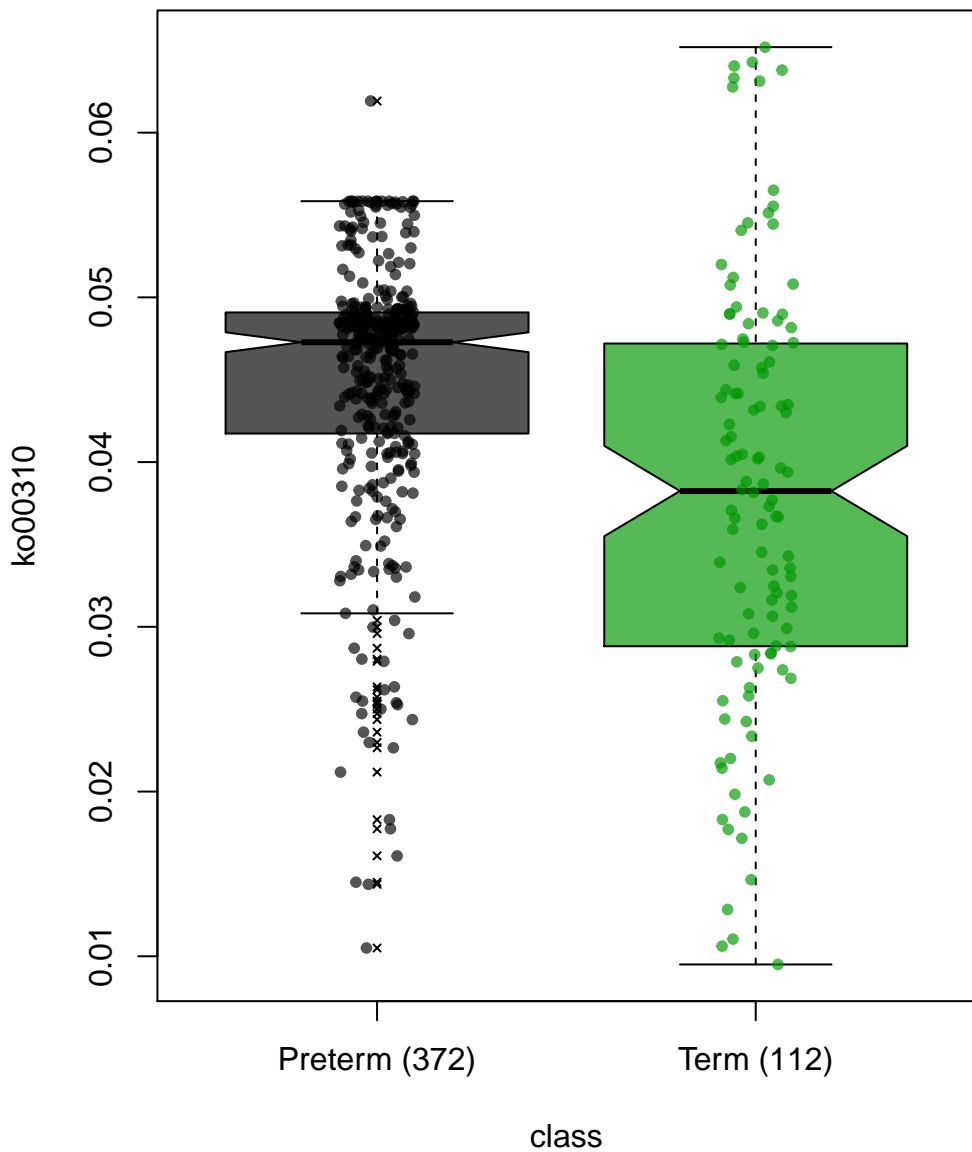

Partial Residual Plot

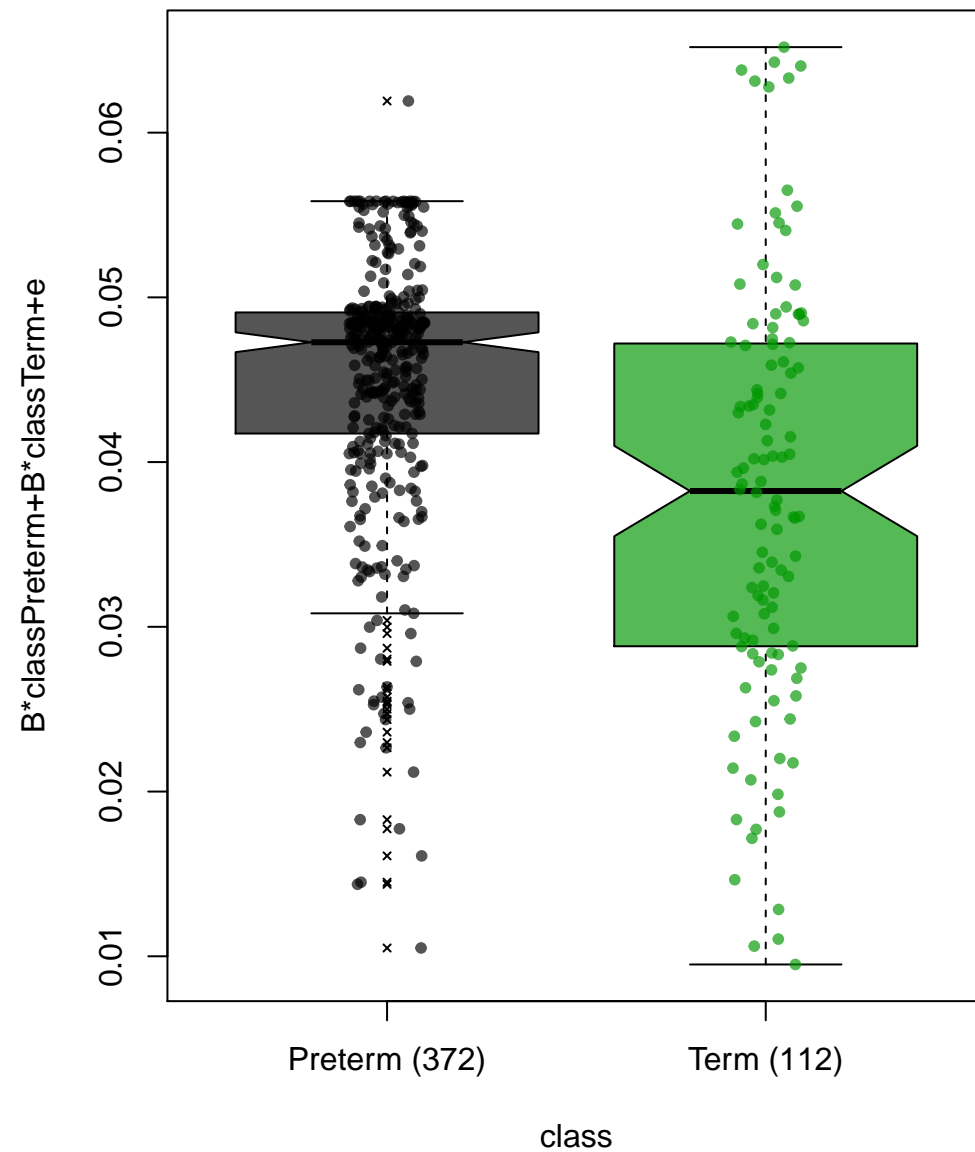

classTerm (0.00528 sd 0.000768, p=1.98e-11, q=6.49e-11)

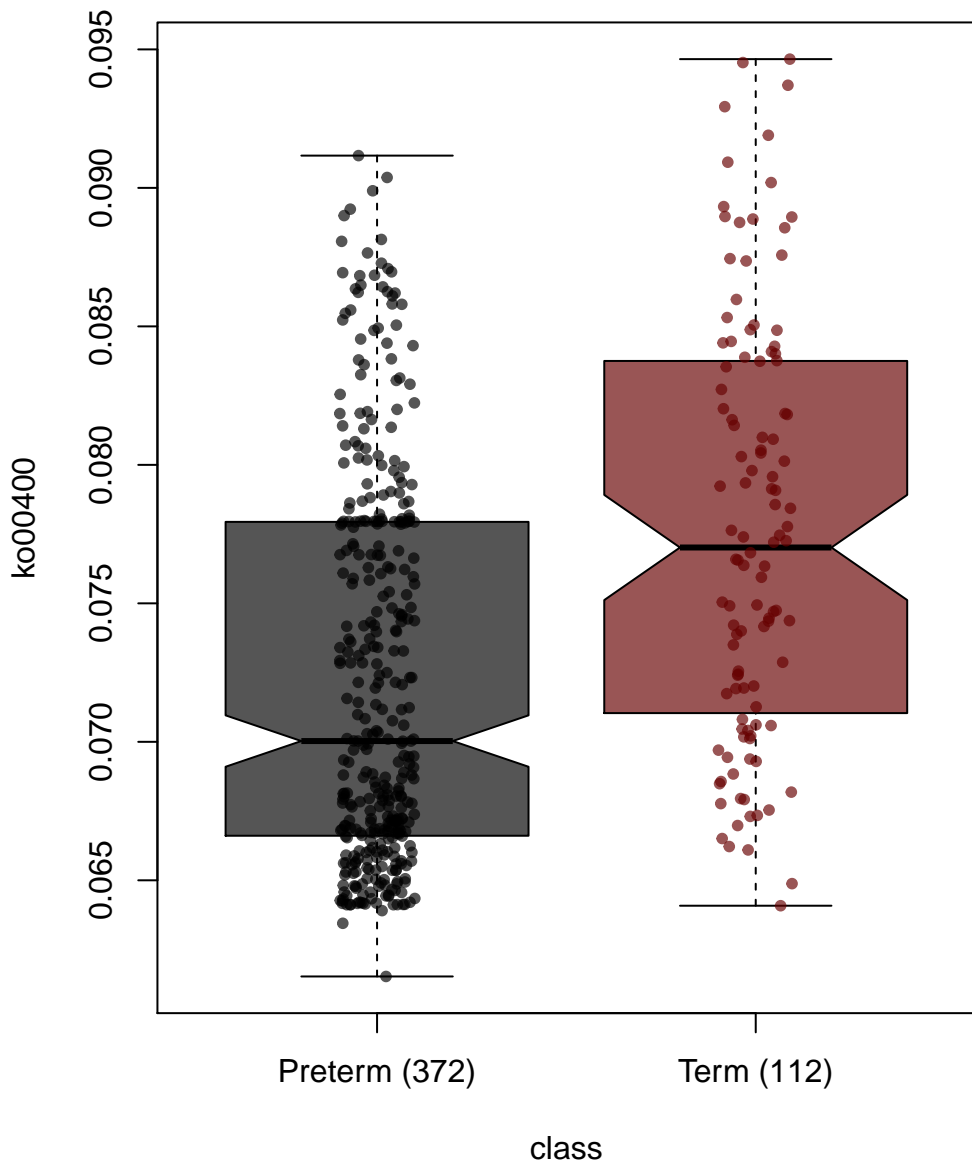

Partial Residual Plot

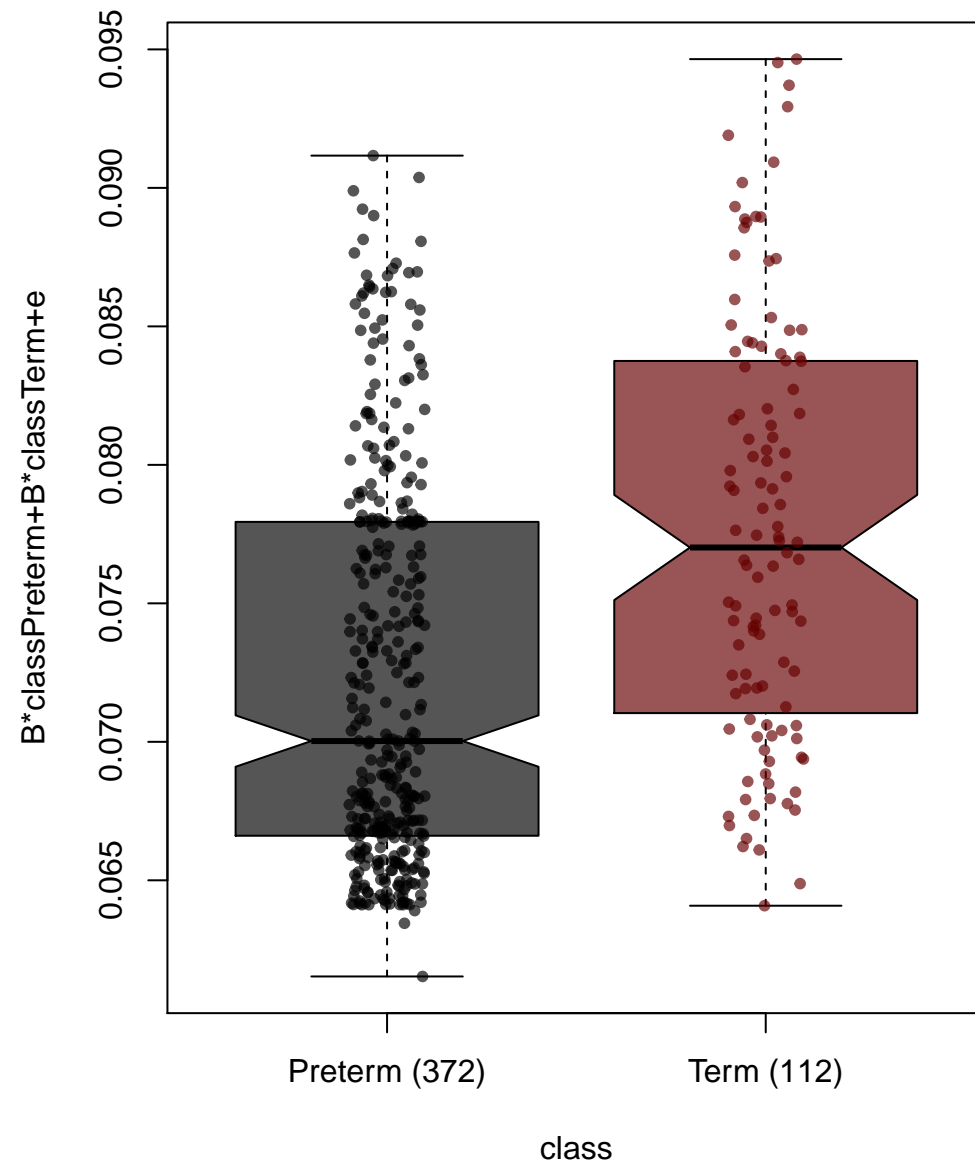

classTerm (0.00333 sd 0.000486, p=2.17e-11, q=7.06e-11)

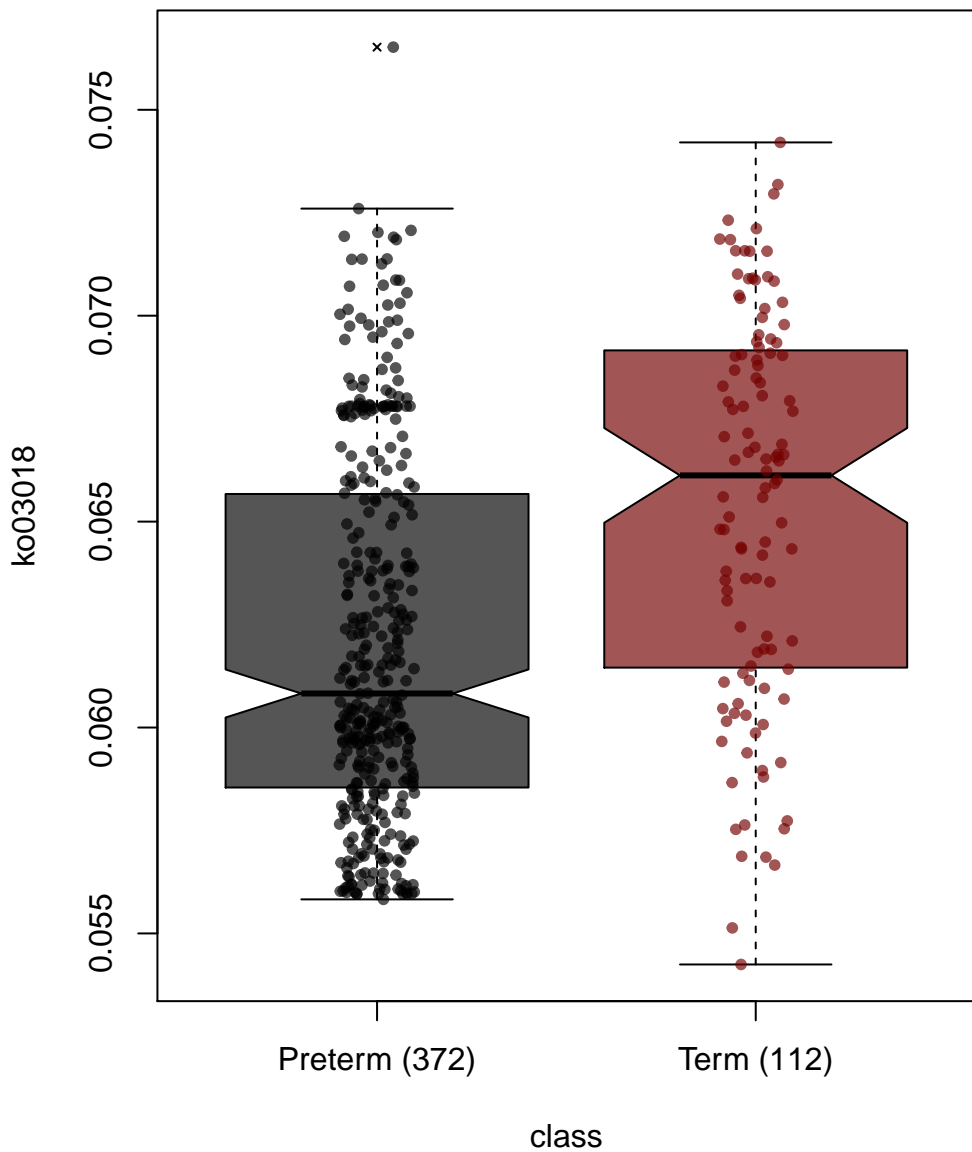

Partial Residual Plot

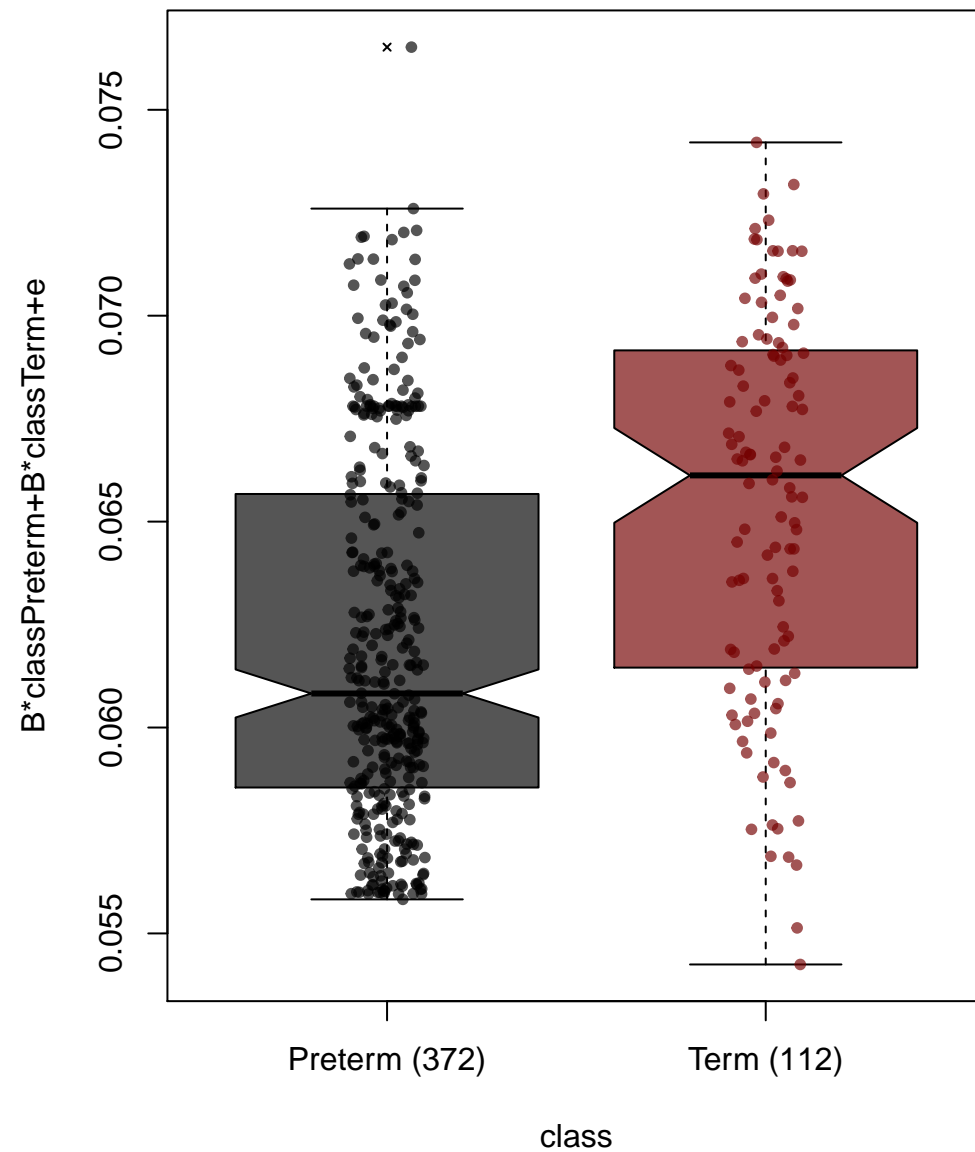

classTerm ( $-0.00328$  sd  $0.000489$ ,  $p=5.25e-11$ ,  $q=1.68e-10$ )

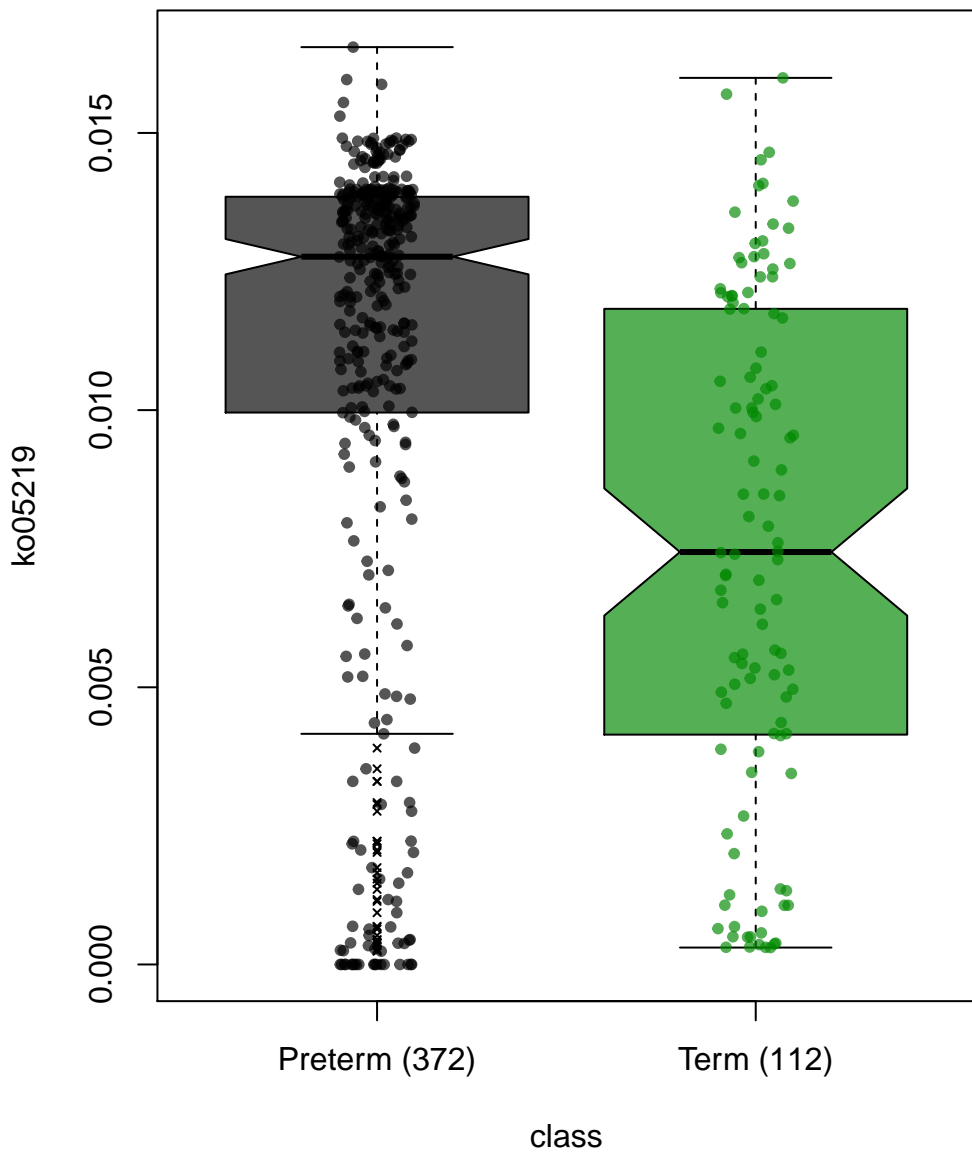

Partial Residual Plot

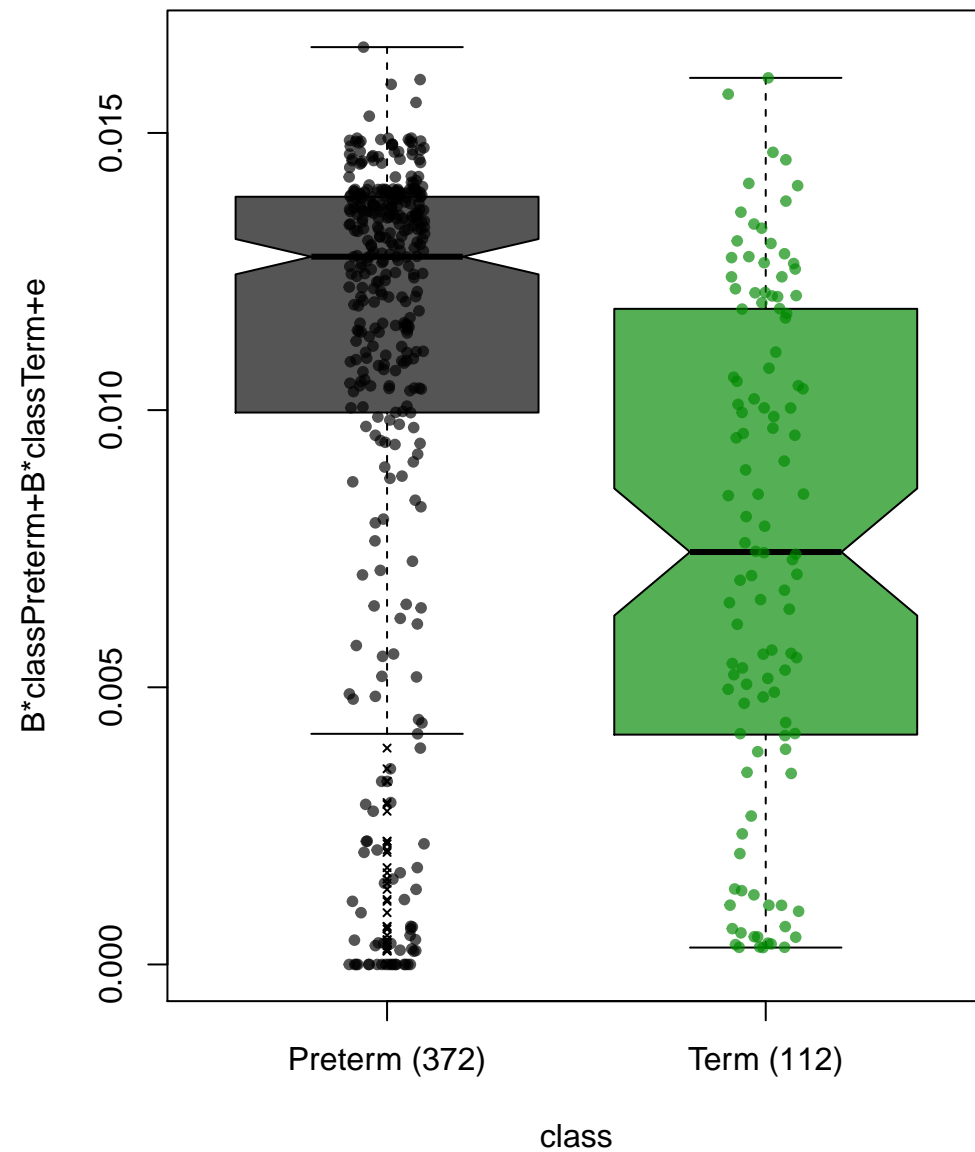

classTerm (−0.00308 sd 0.000461, p=6.66e−11, q=2.11e−10)

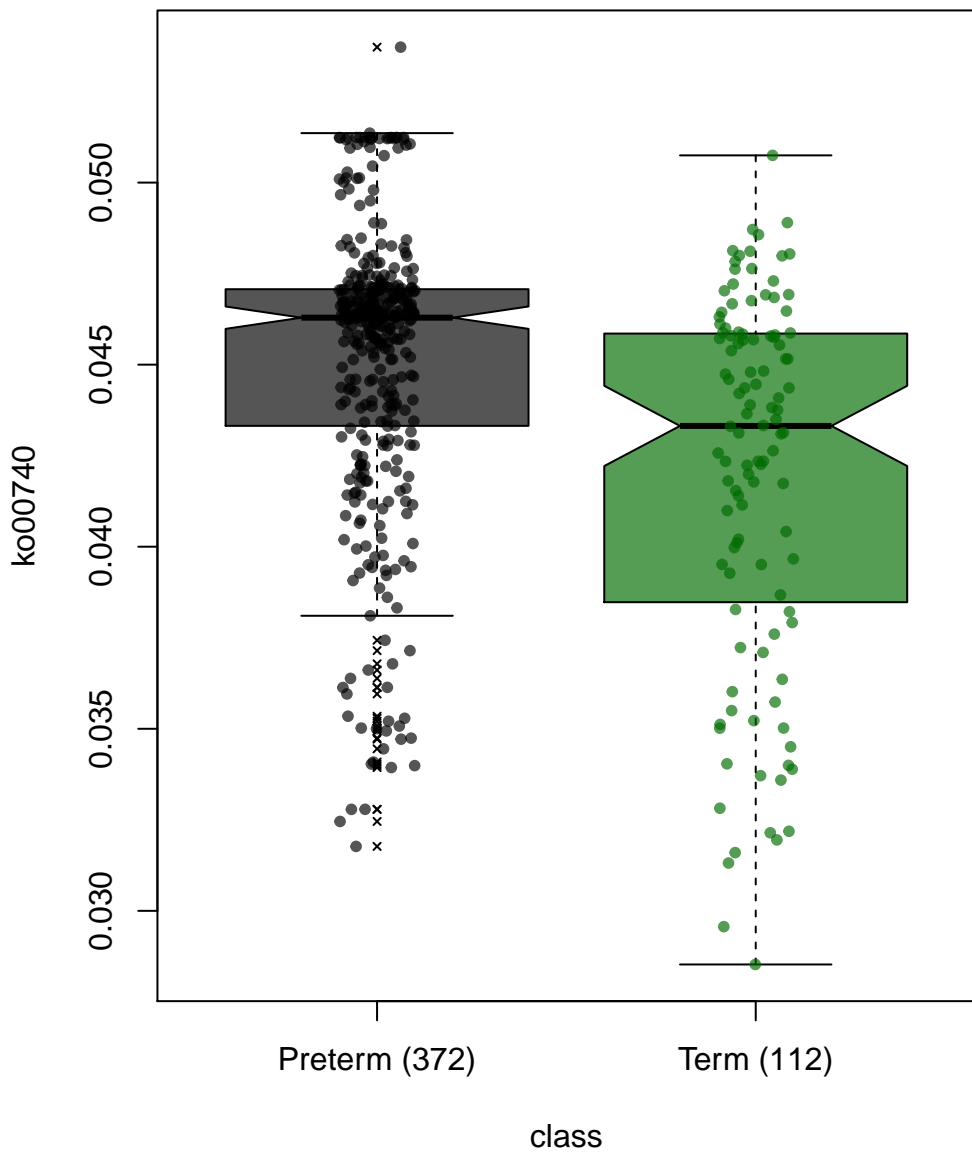

Partial Residual Plot

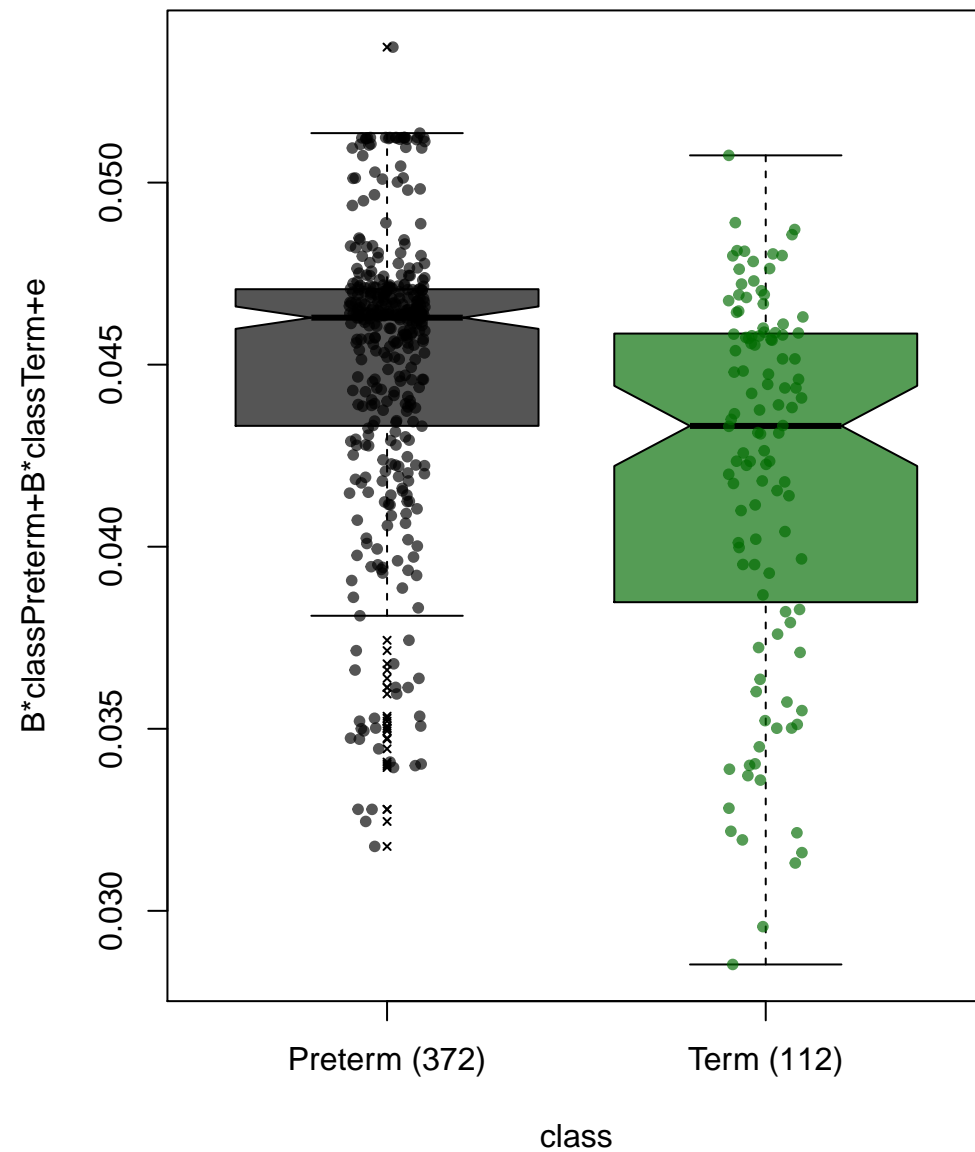

classTerm (0.00154 sd 0.000232, p=9.32e-11, q=2.92e-10)

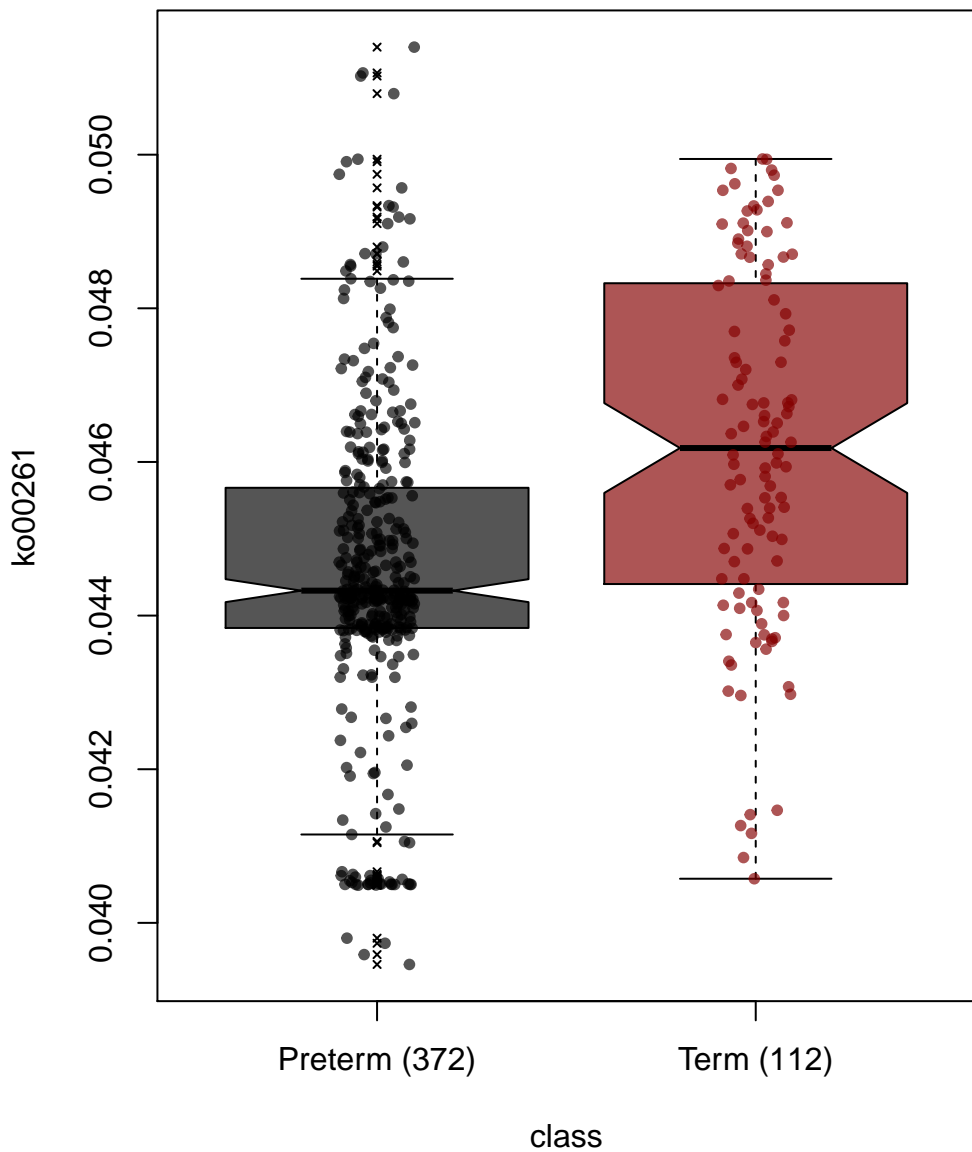

Partial Residual Plot

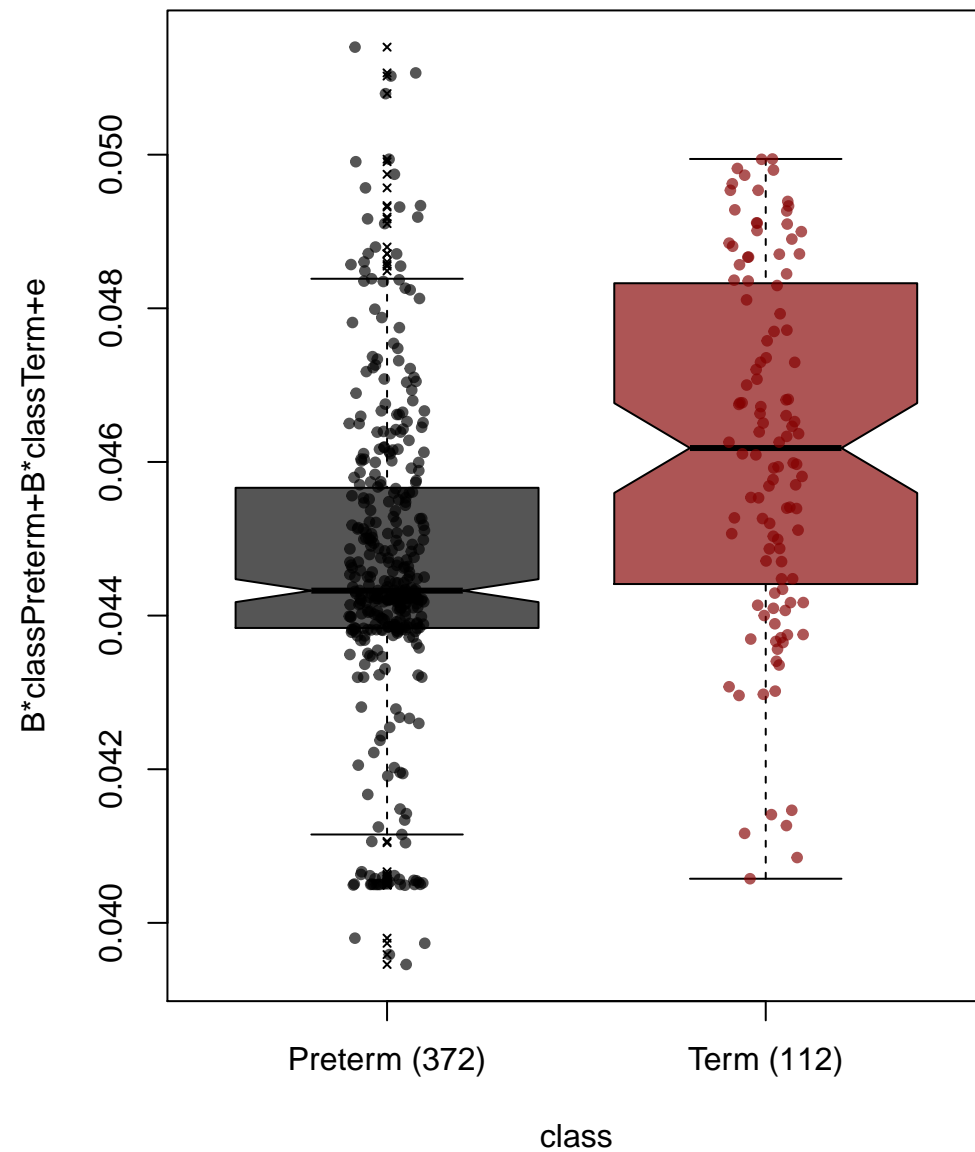

classTerm ( $-0.00585$  sd  $0.000885$ ,  $p=9.97e-11$ ,  $q=3.09e-10$ )

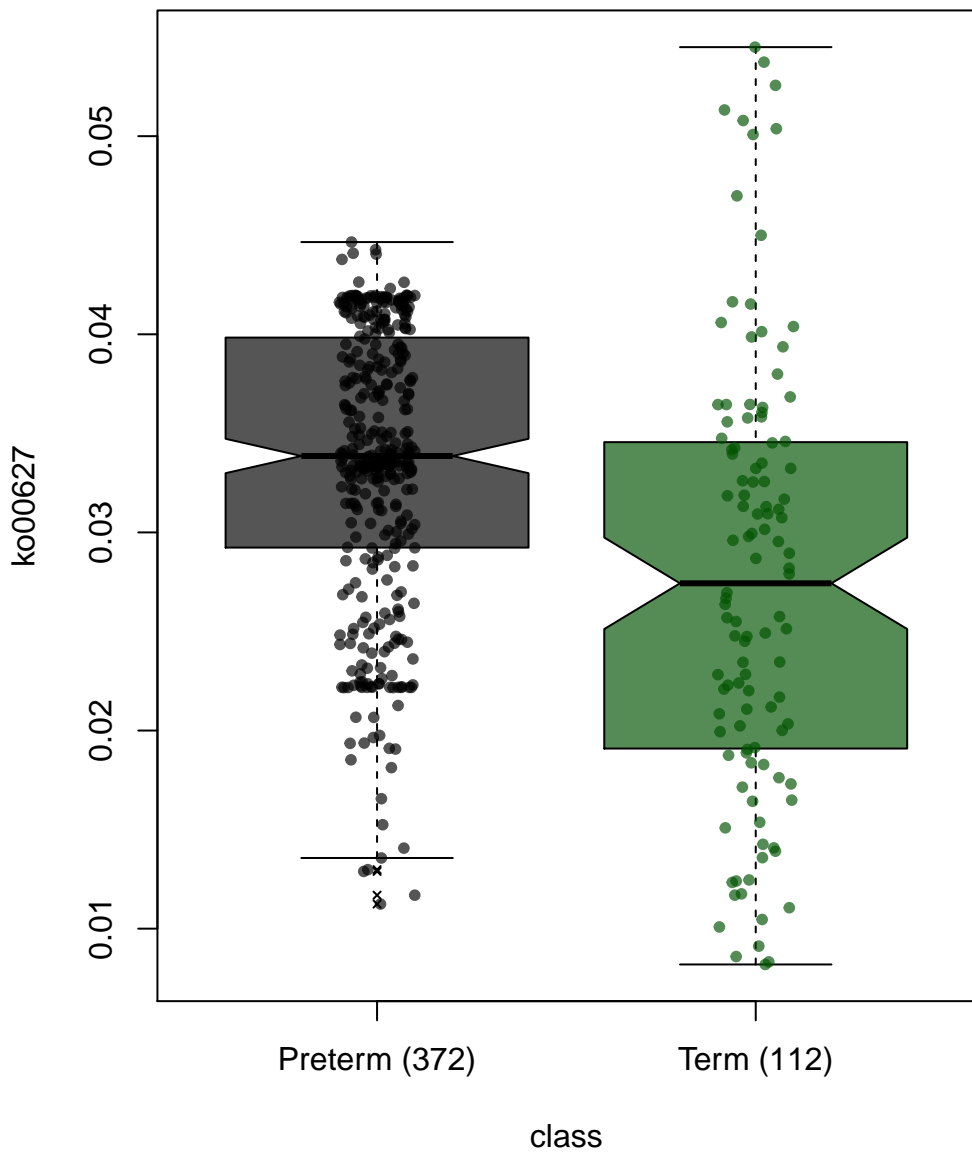

Partial Residual Plot

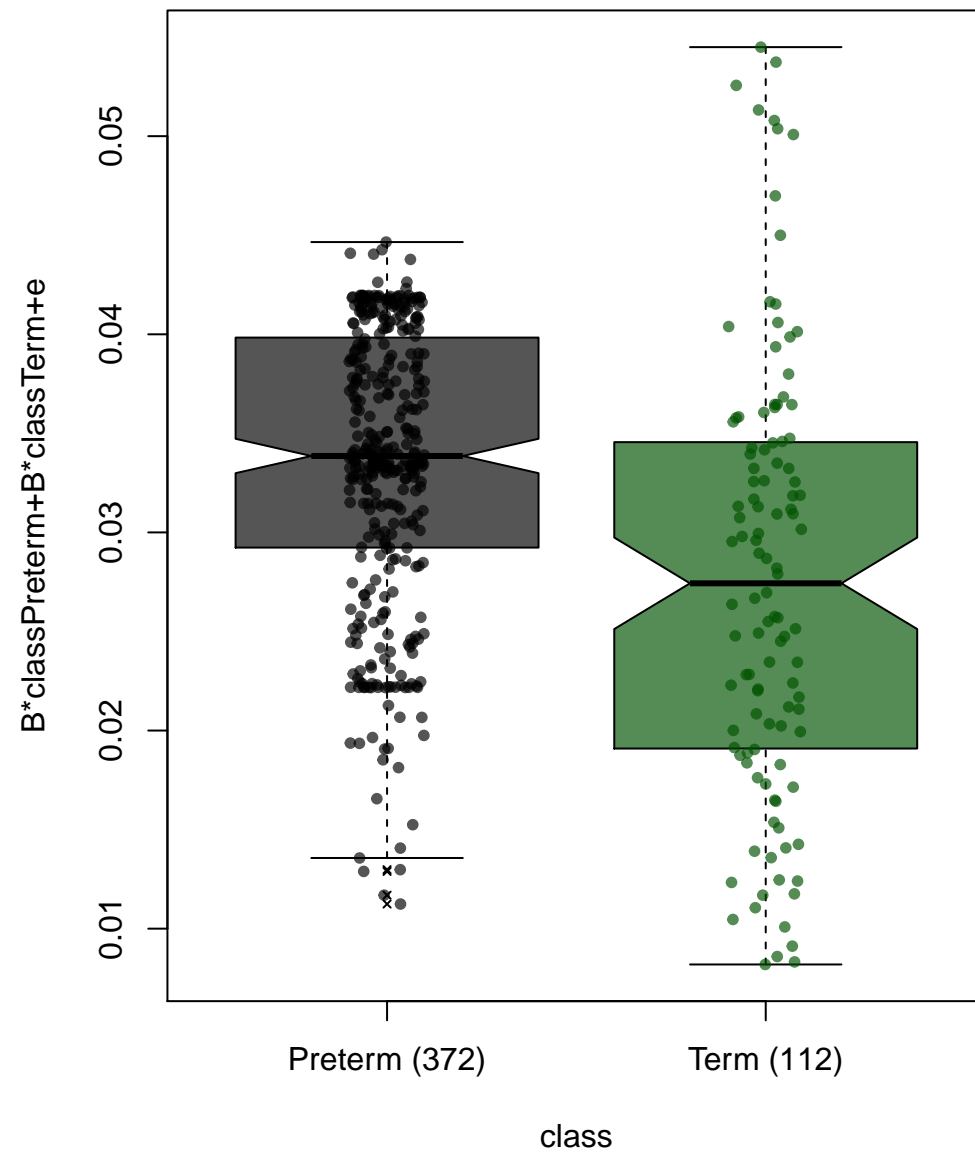

classTerm (0.00142 sd 0.000215, p=1.19e-10, q=3.66e-10)

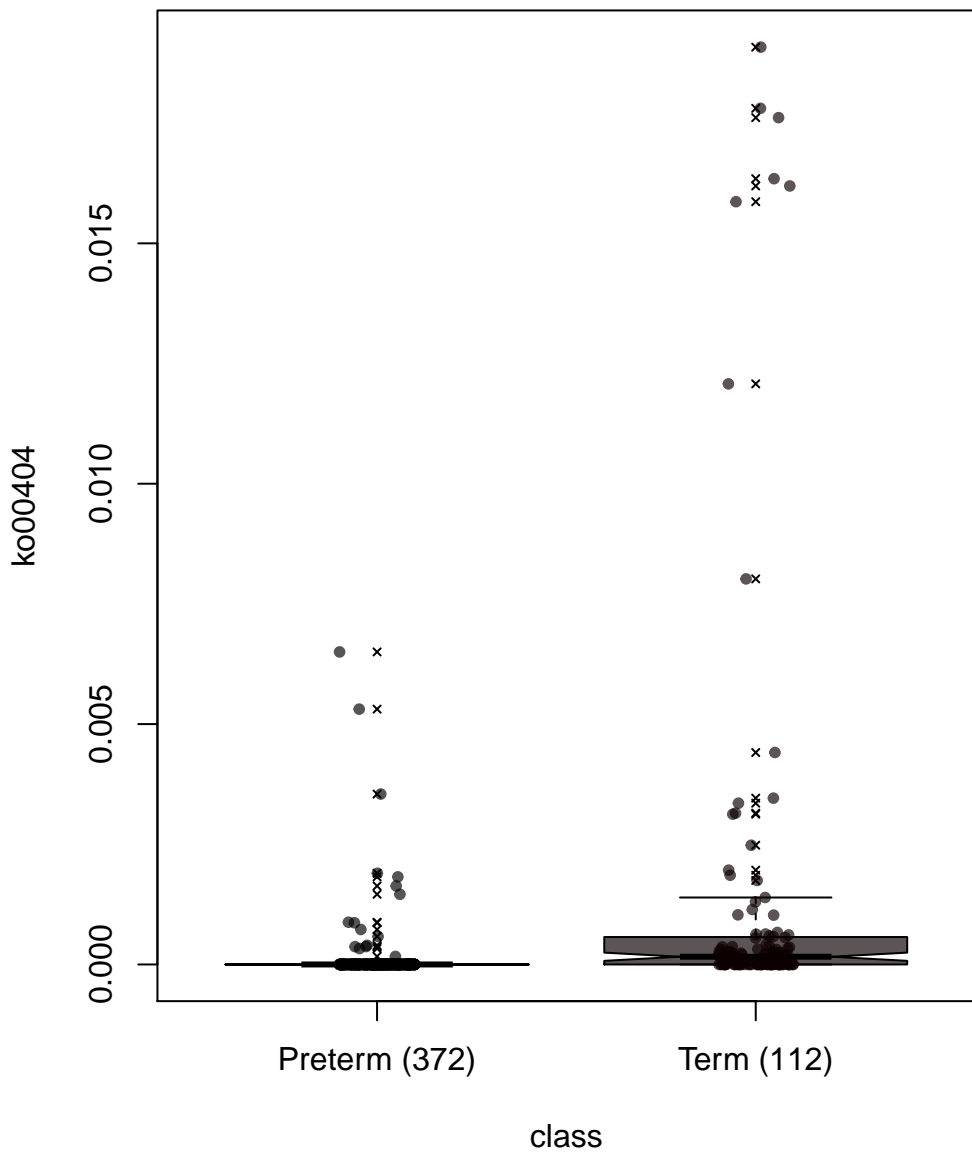

Partial Residual Plot

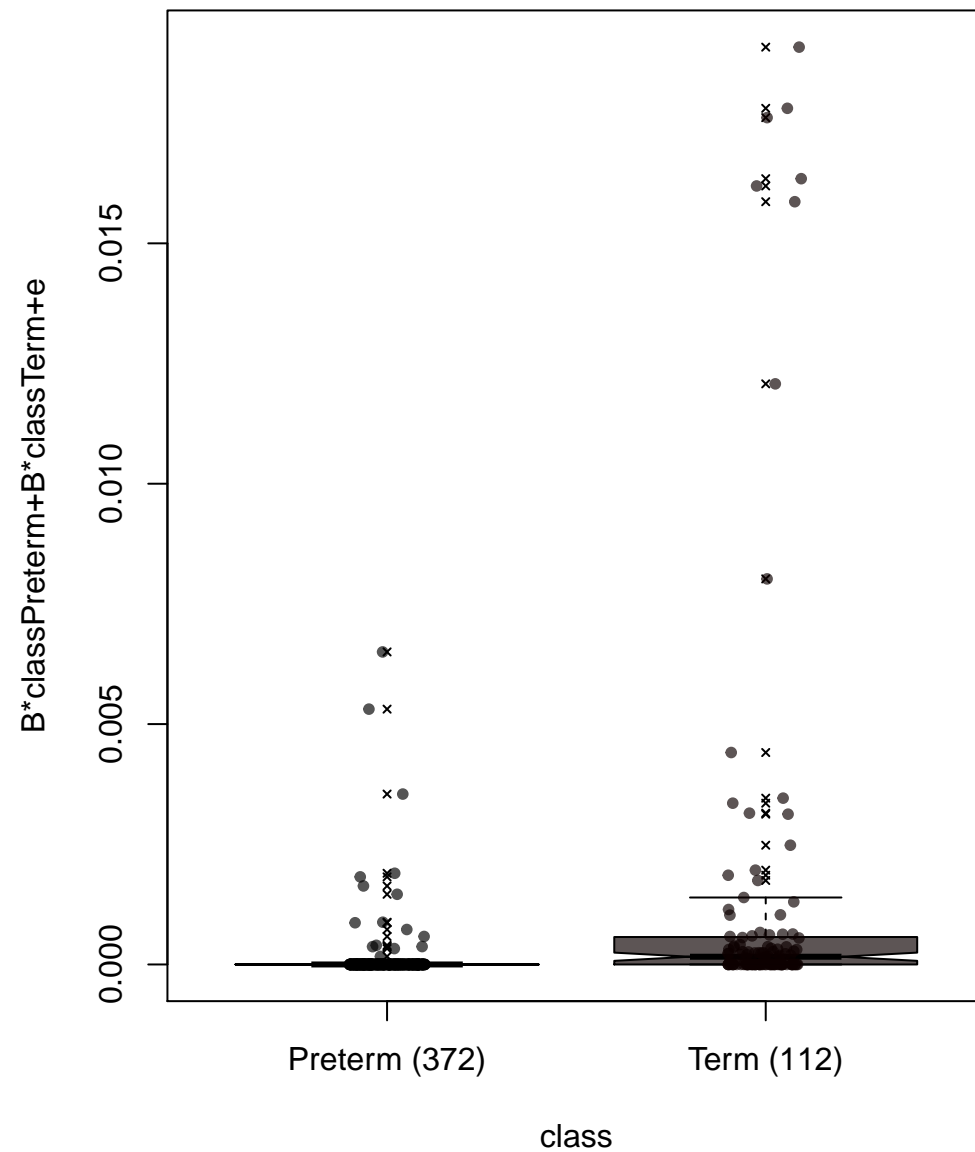



classTerm ( $-0.00718$  sd  $0.0011$ ,  $p=1.51e-10$ ,  $q=4.58e-10$ )

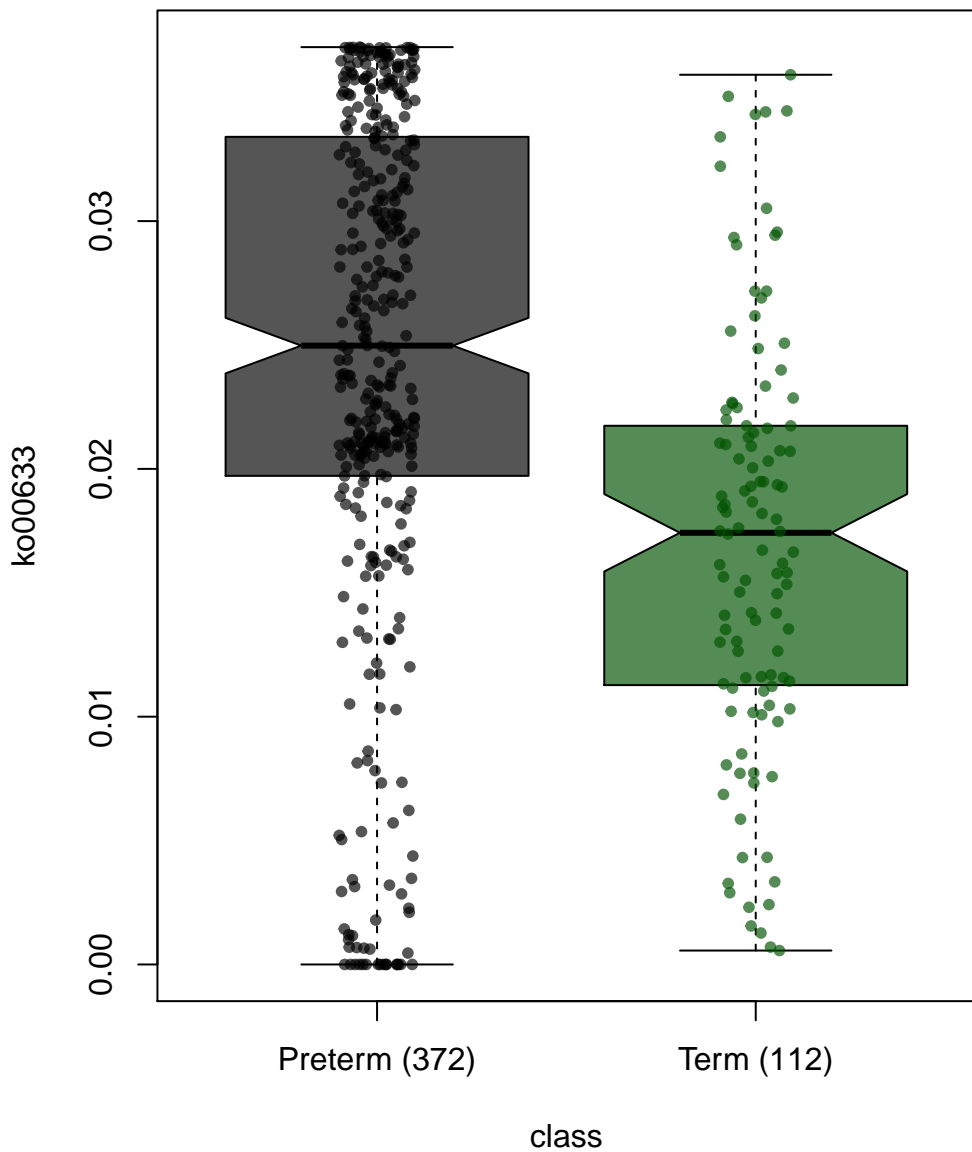

Partial Residual Plot

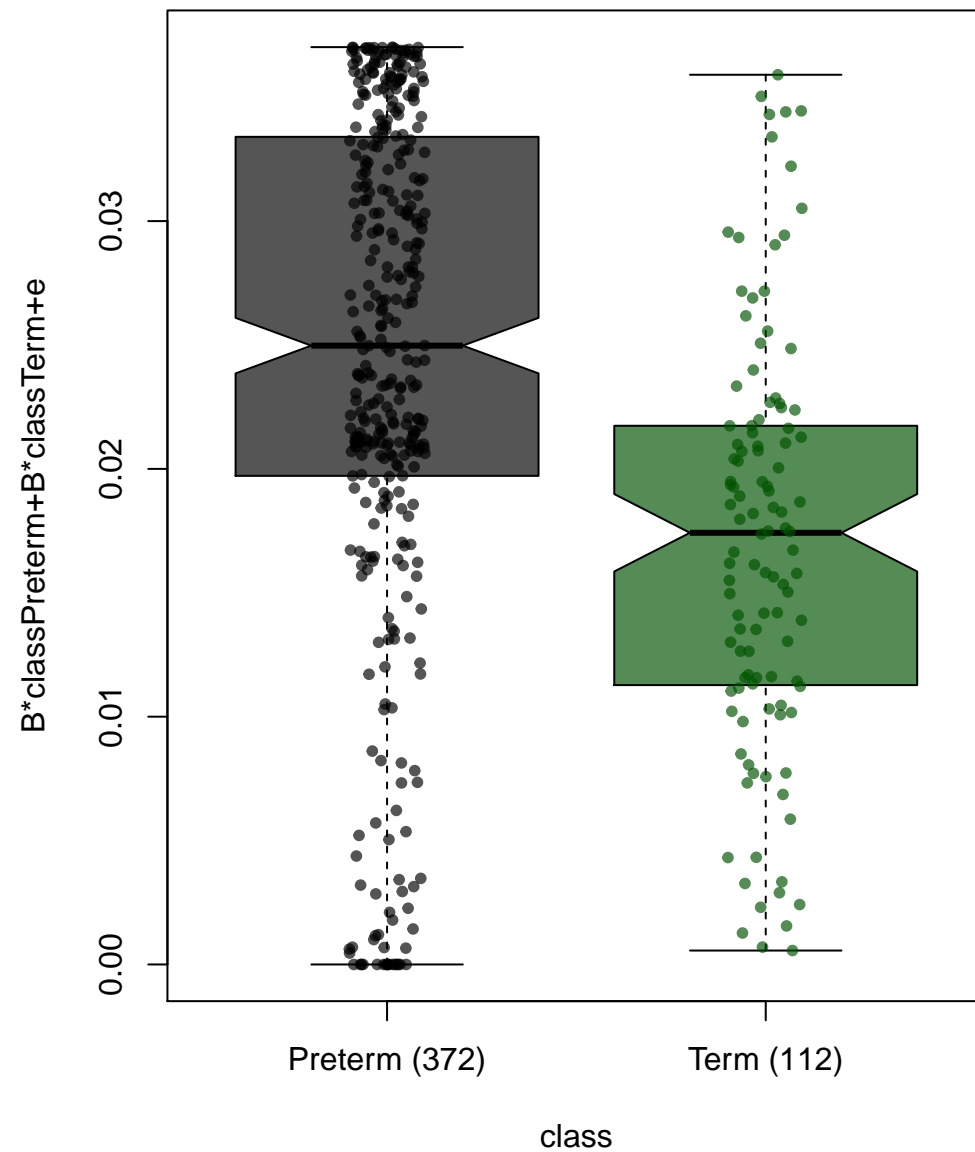

classTerm (0.00483 sd 0.000739, p=1.59e-10, q=4.78e-10)

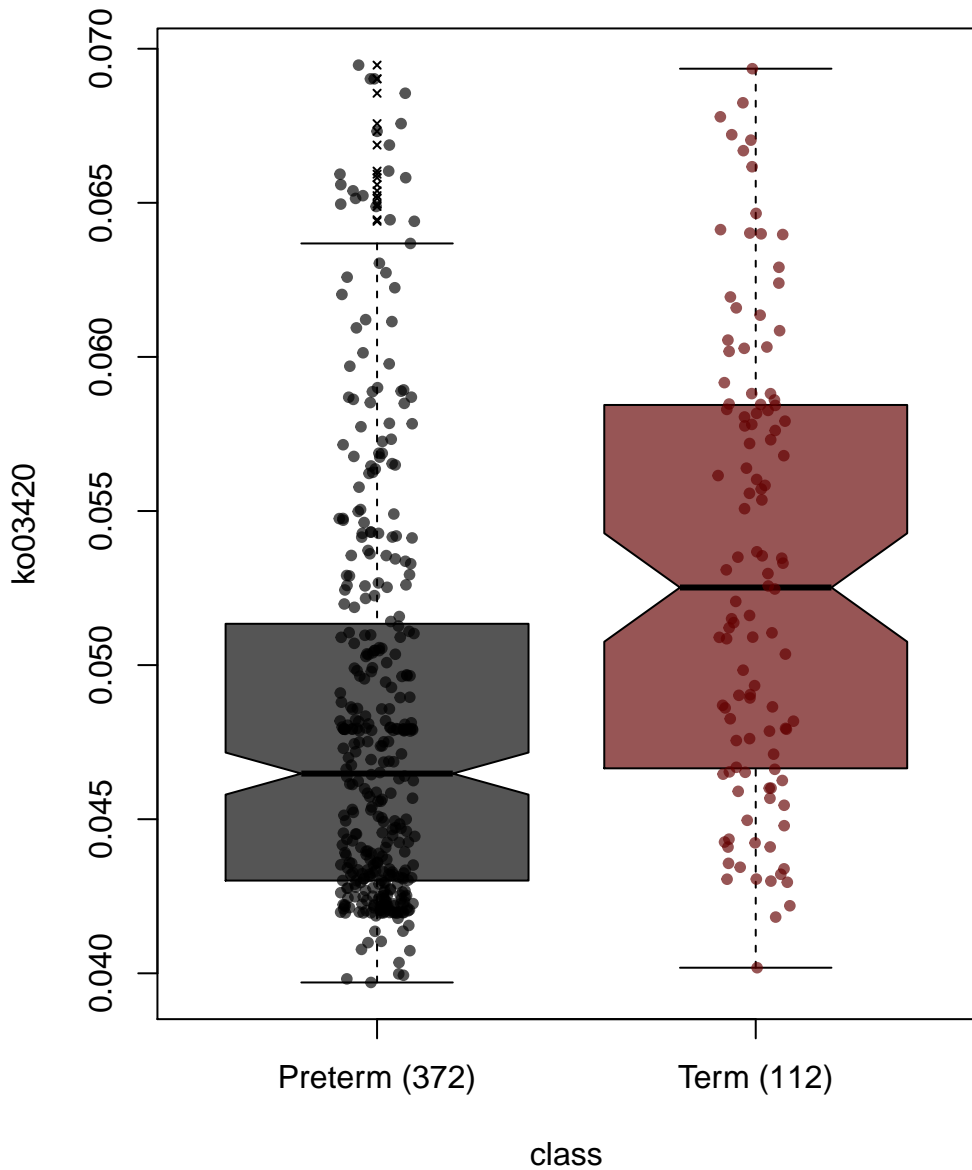

Partial Residual Plot

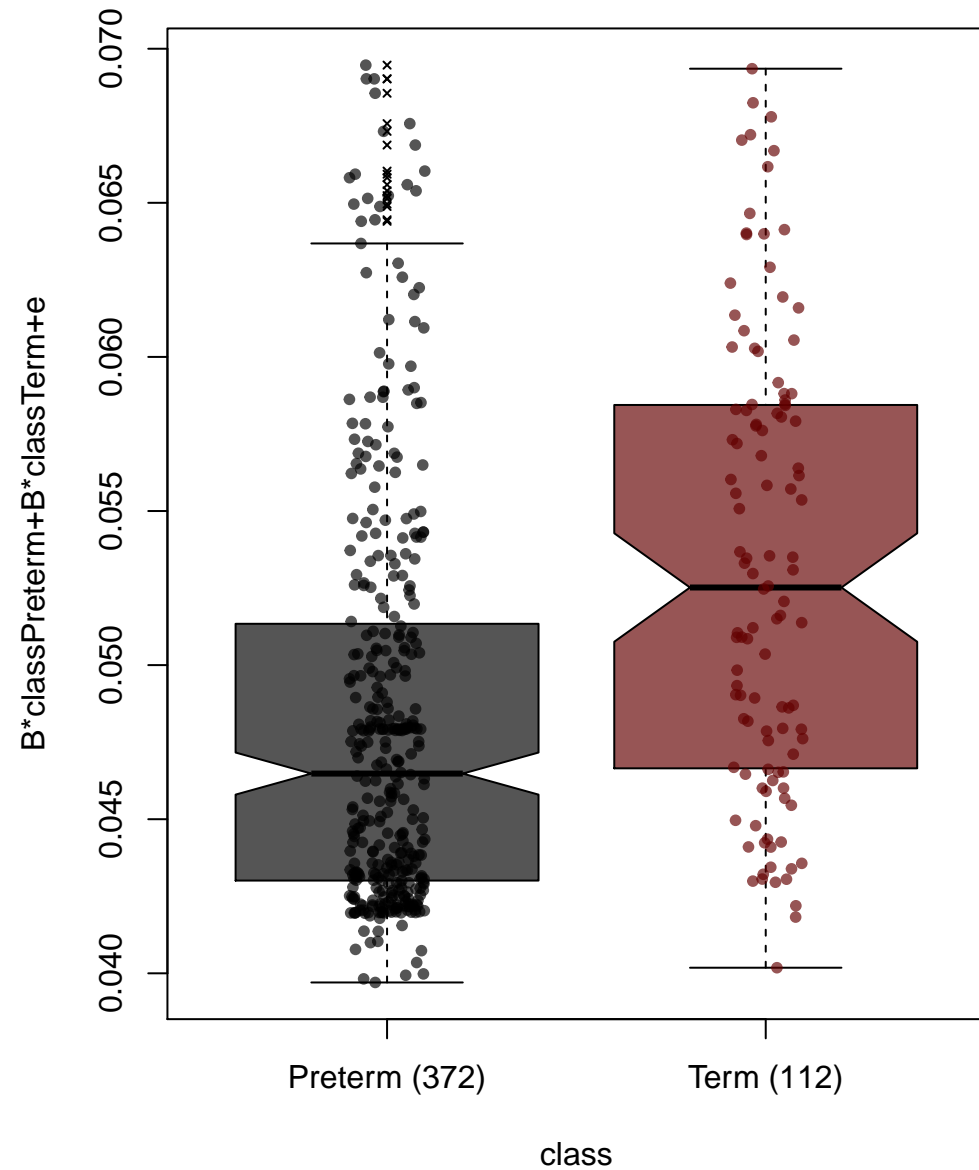

classTerm (0.00469 sd 0.000721, p=1.99e-10, q=5.92e-10)

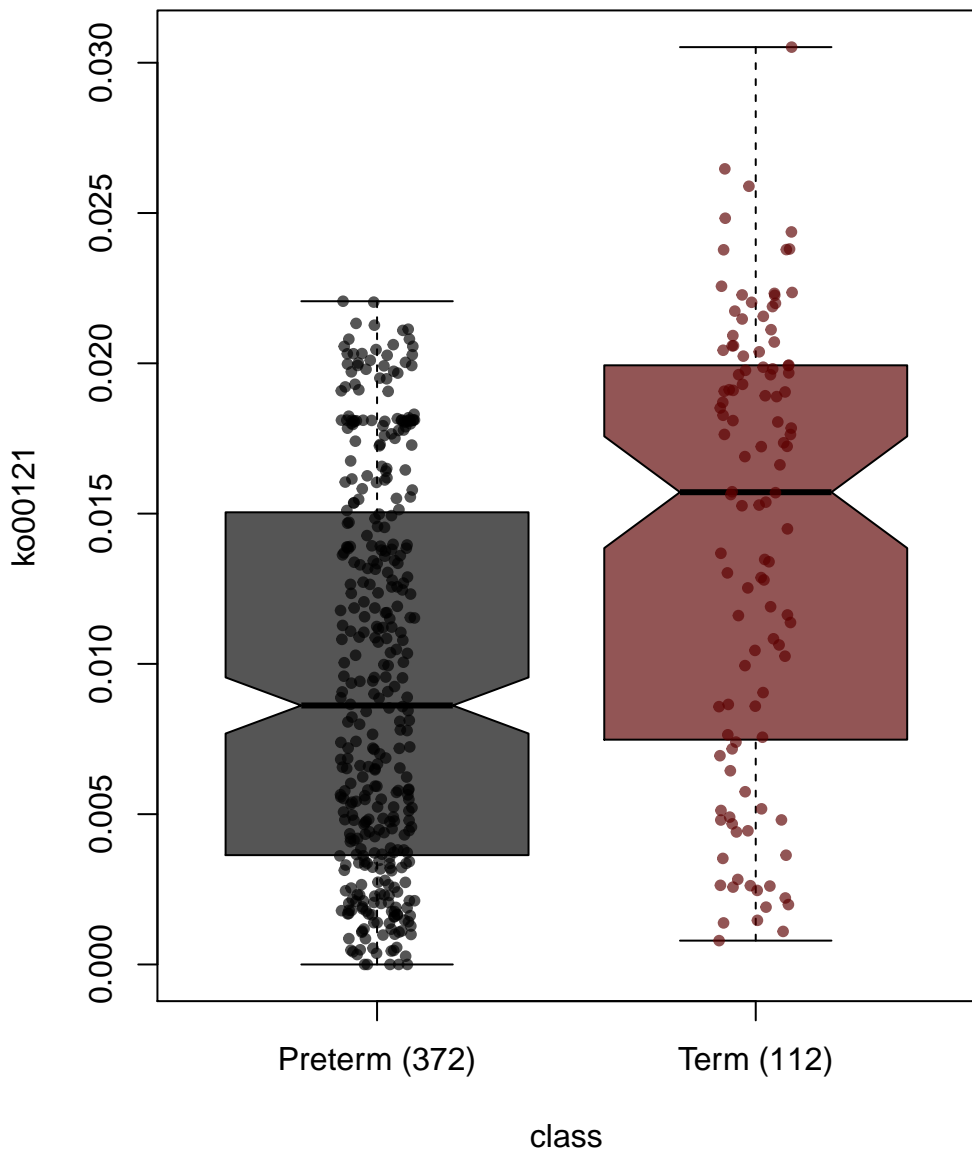

Partial Residual Plot

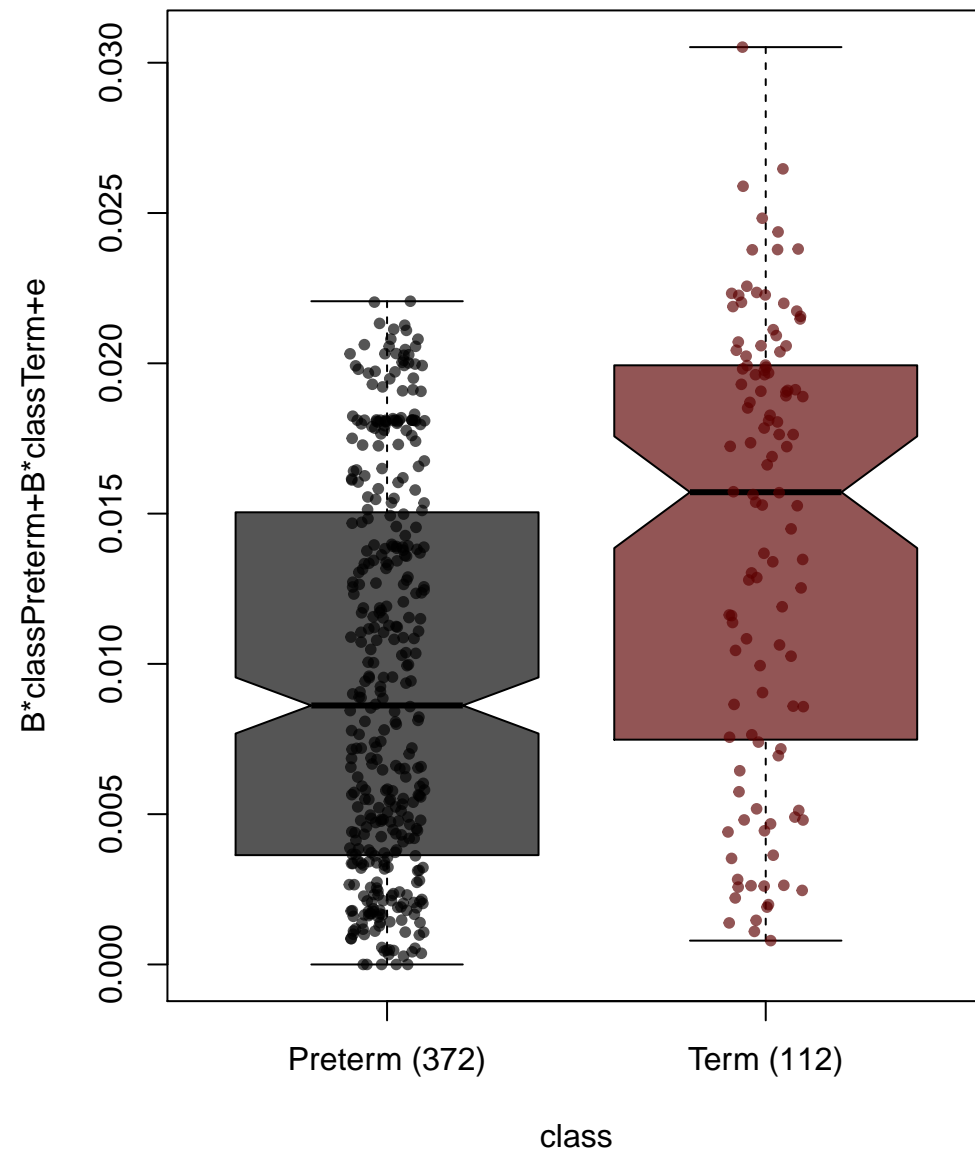

classTerm ( $-0.00713$  sd  $0.0011$ ,  $p=2.21e-10$ ,  $q=6.5e-10$ )

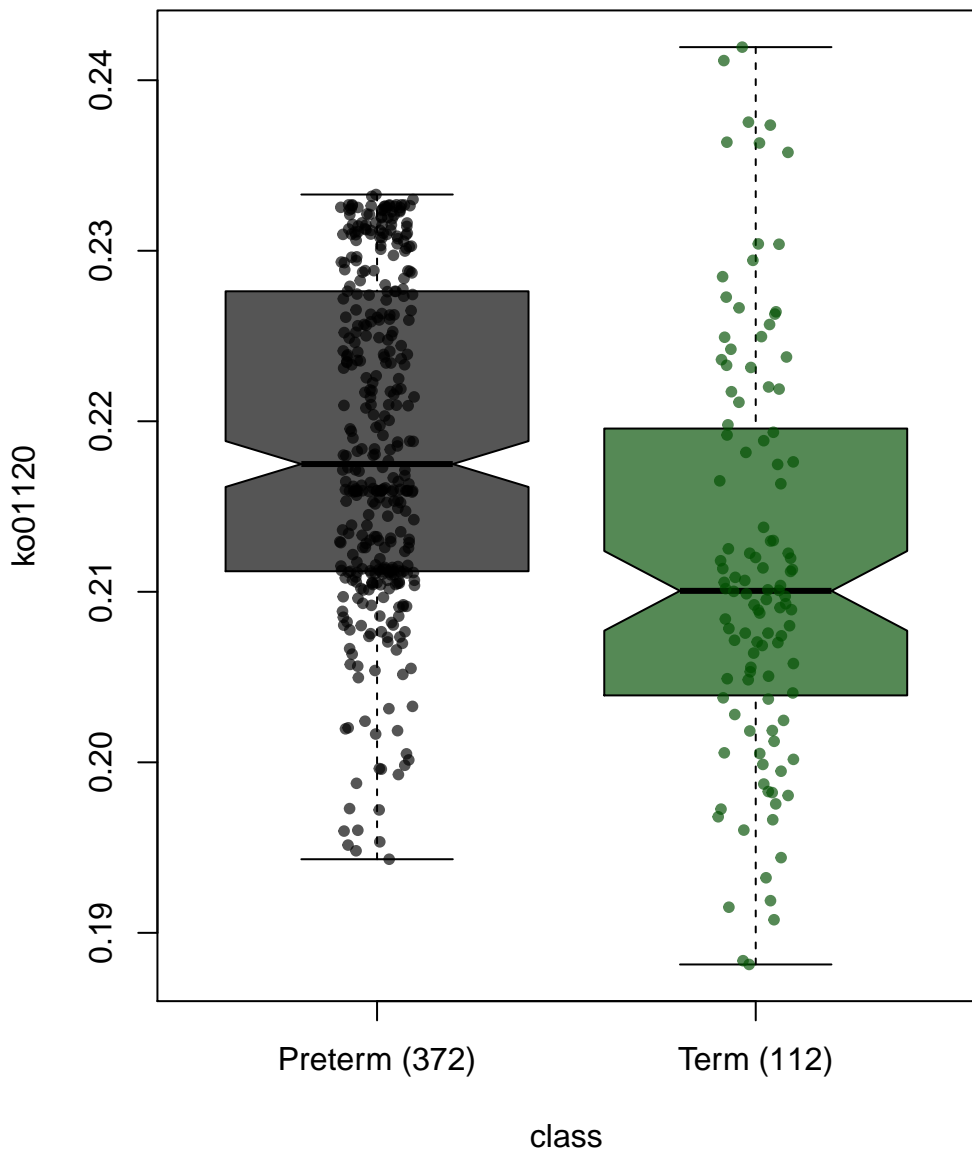

Partial Residual Plot

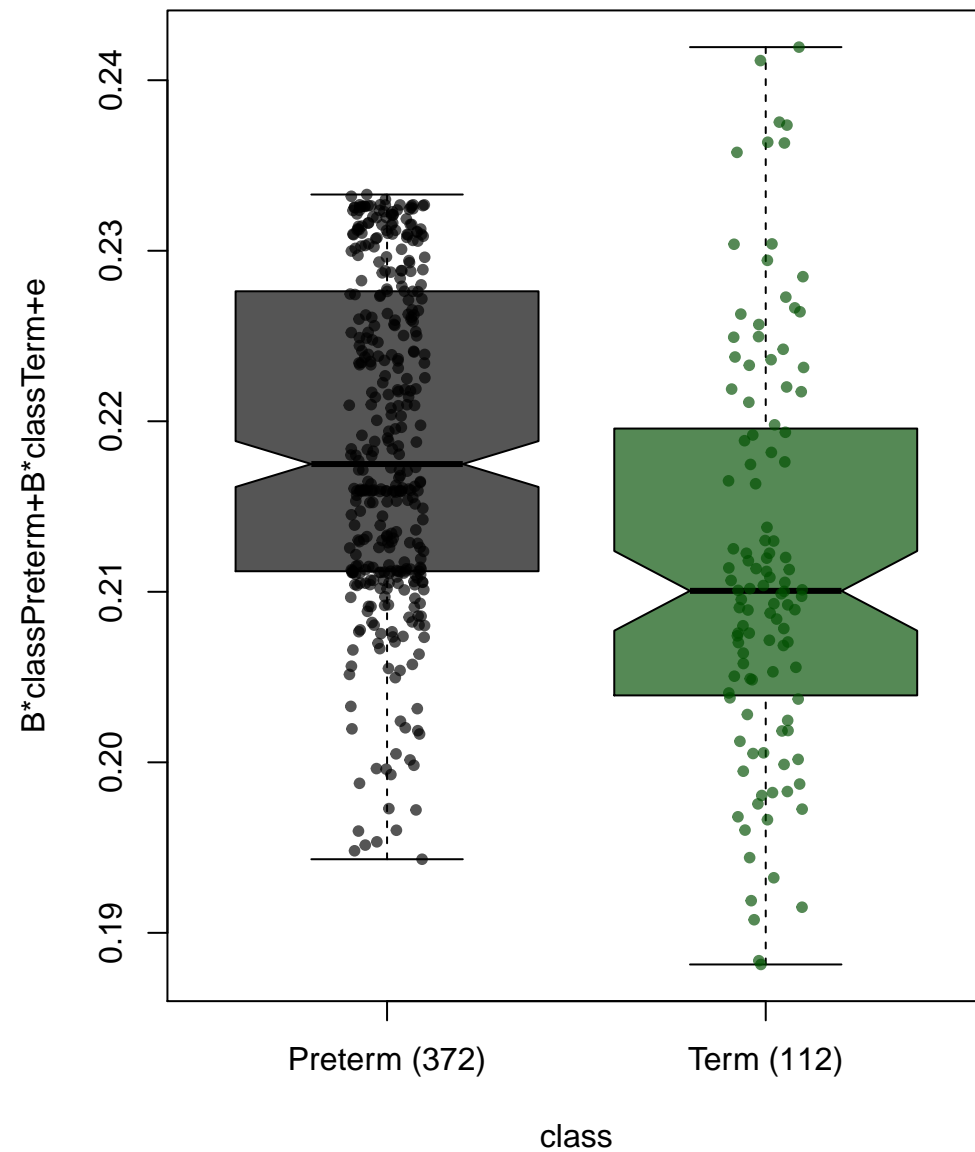

classTerm (0.00166 sd 0.000258, p=3.06e-10, q=8.89e-10)

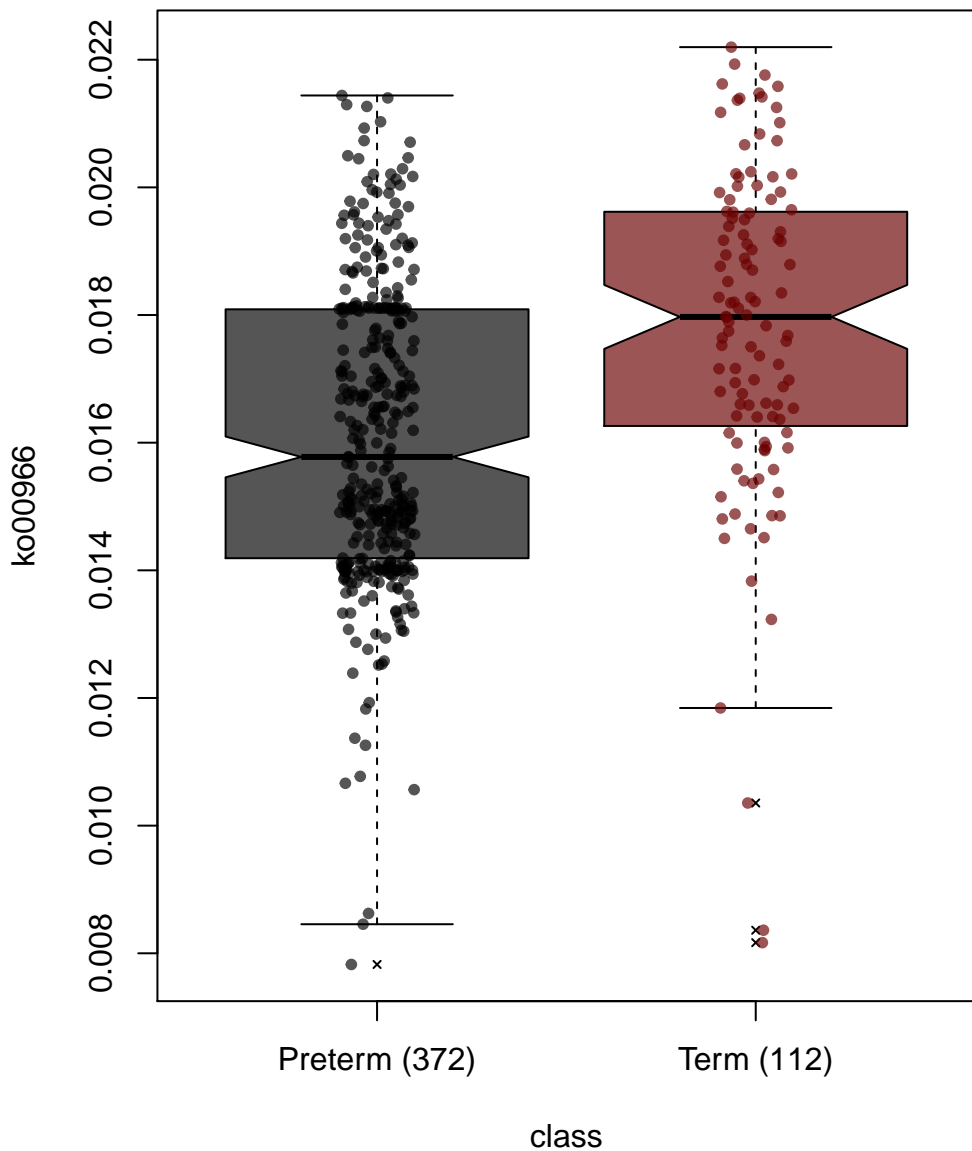

Partial Residual Plot

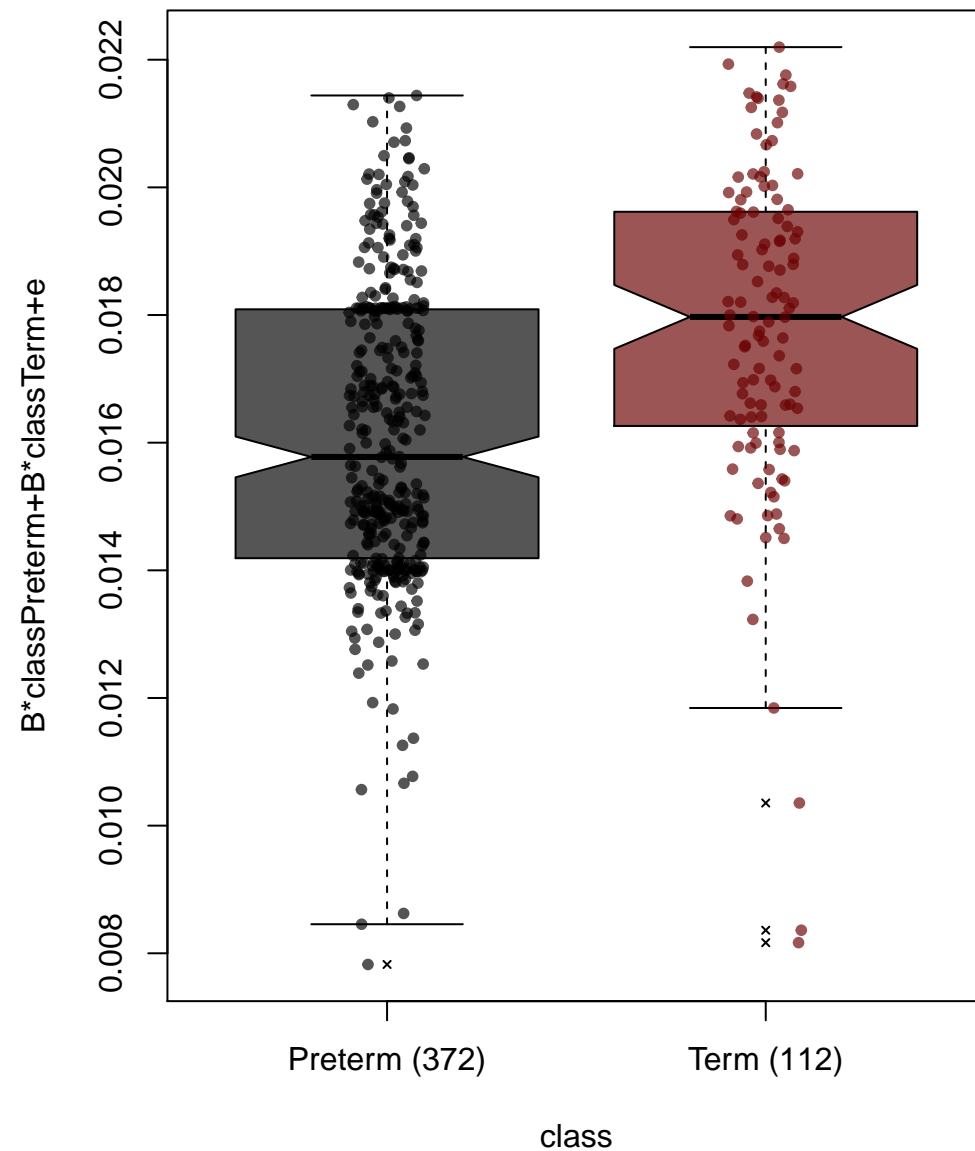

classTerm (-0.00413 sd 0.000655, p=6.71e-10, q=1.93e-09)

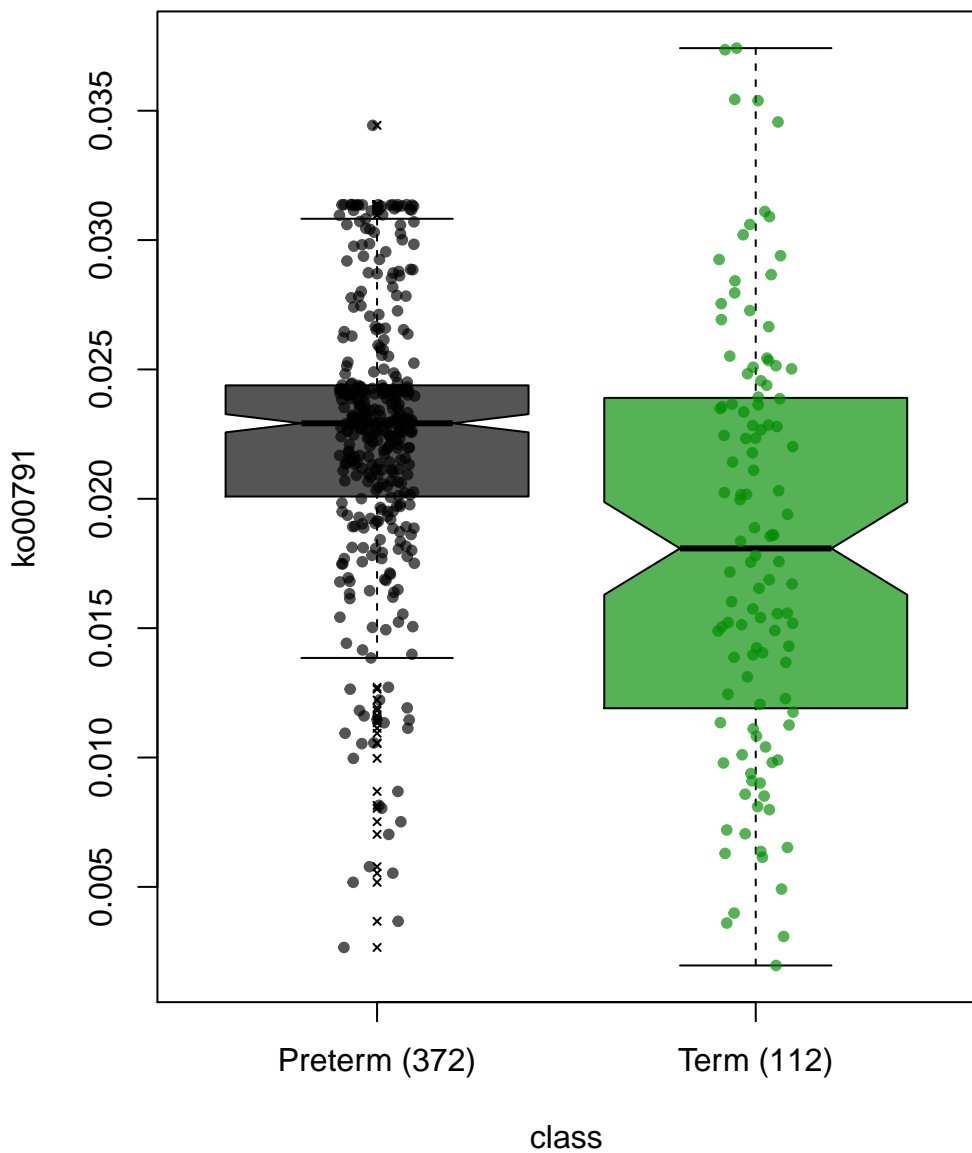

Partial Residual Plot

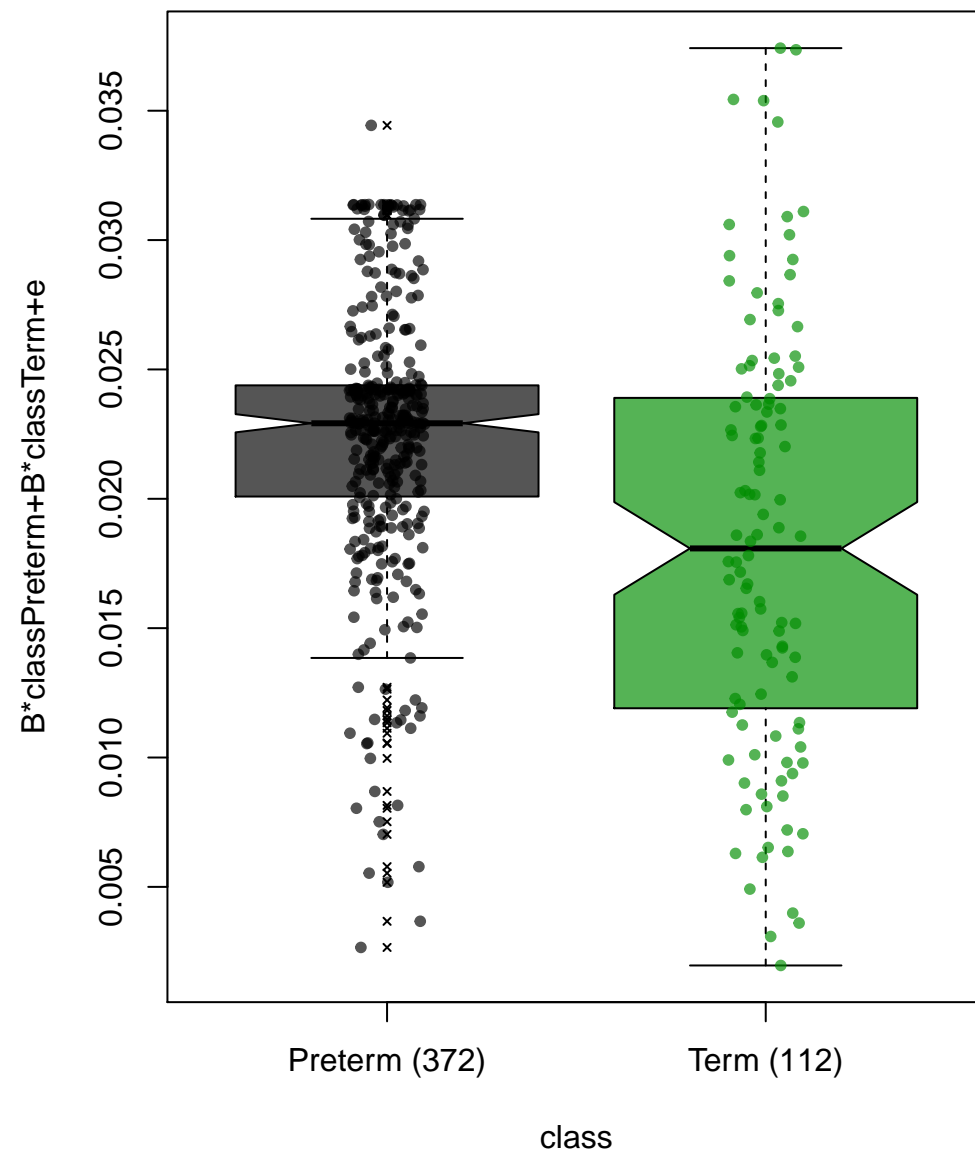

classTerm (-0.0032 sd 0.000511, p=7.98e-10, q=2.27e-09)

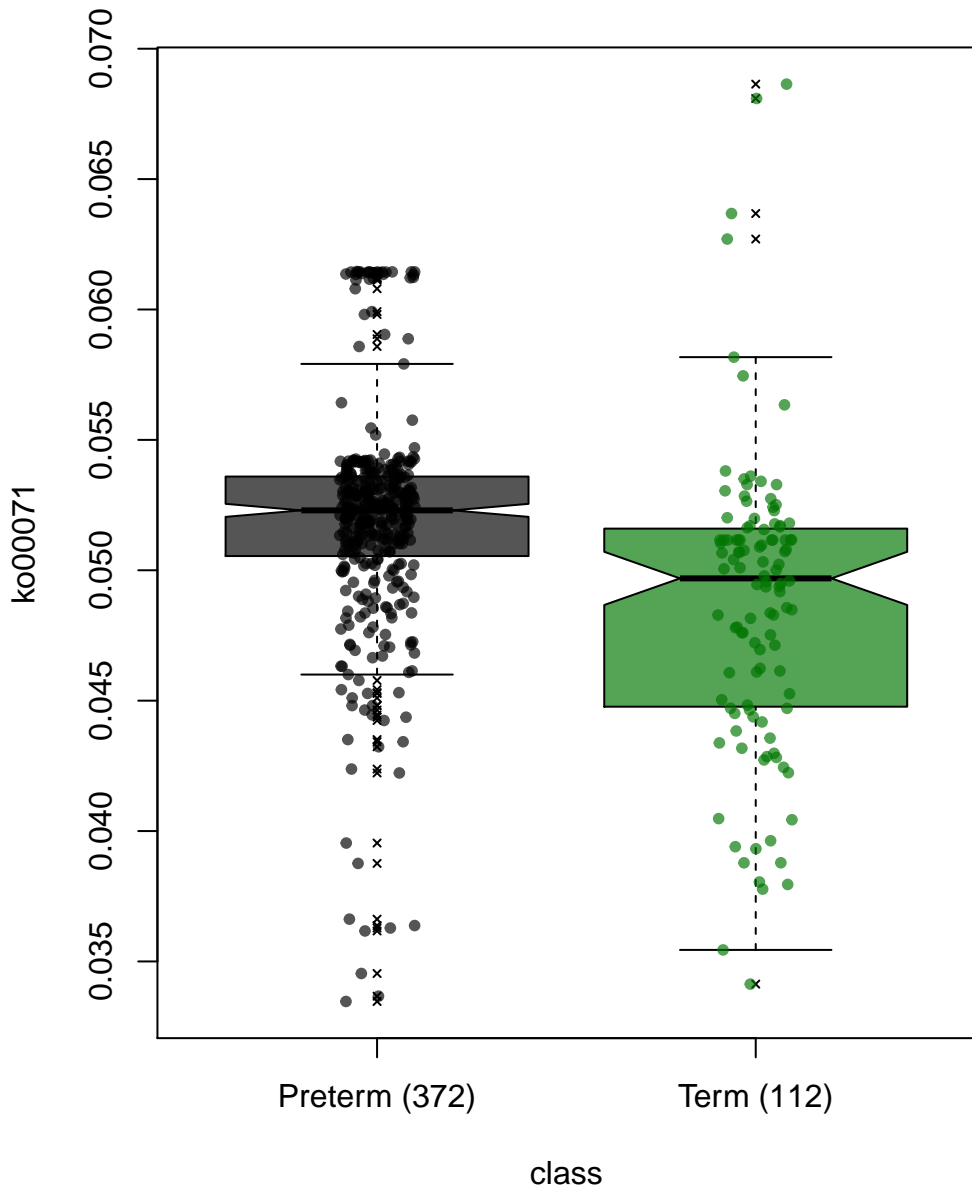

Partial Residual Plot

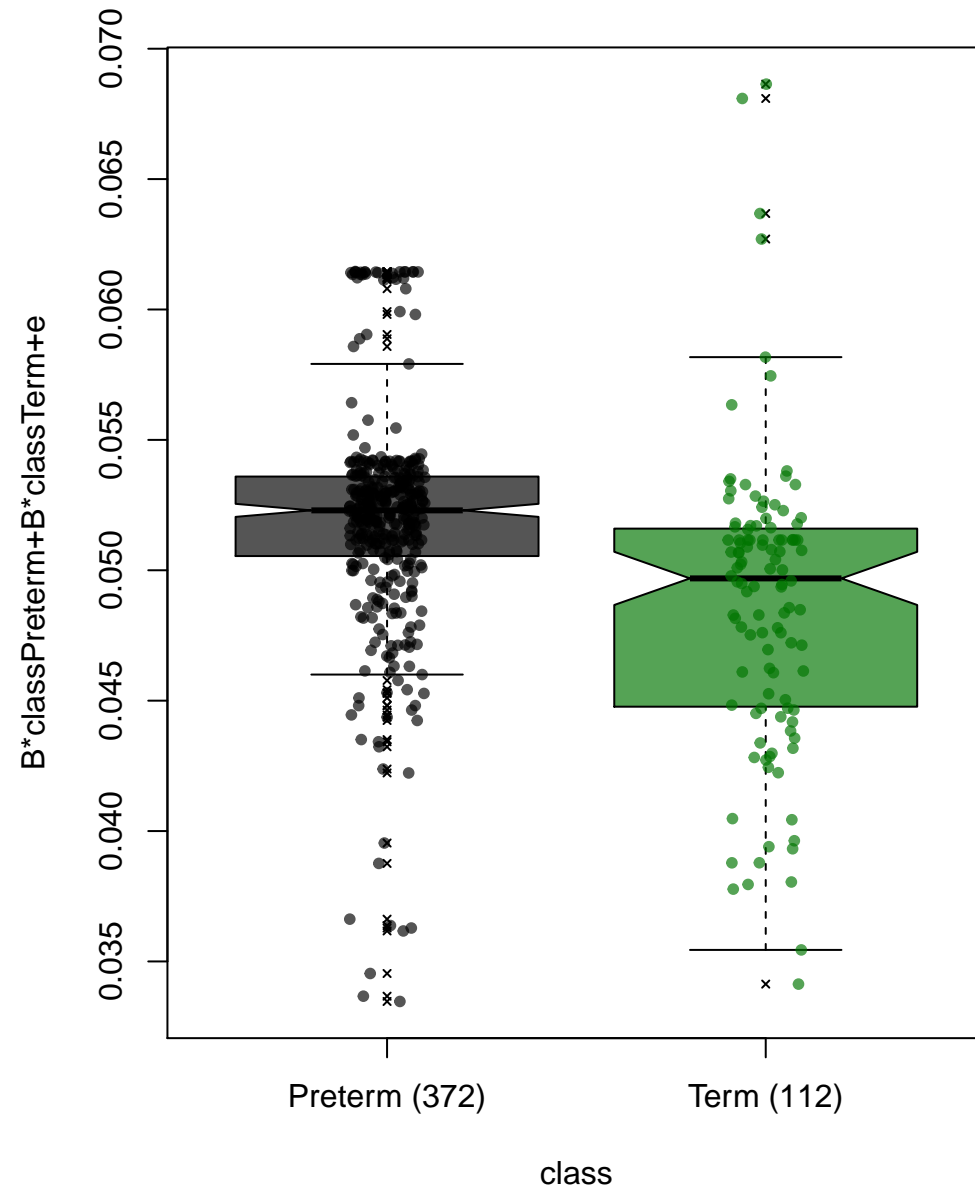

classTerm (−0.00217 sd 0.000349, p=1.08e−09, q=3.05e−09)

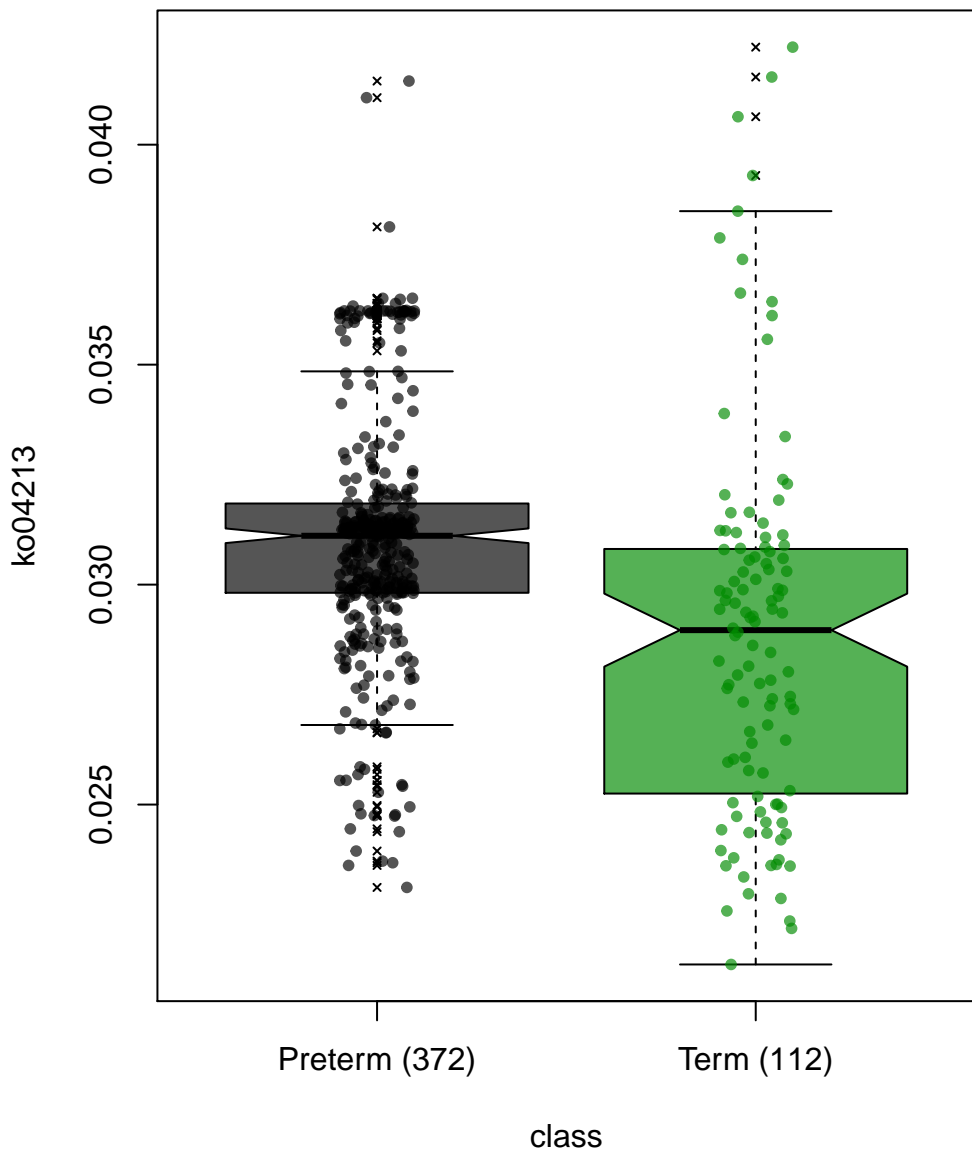

Partial Residual Plot

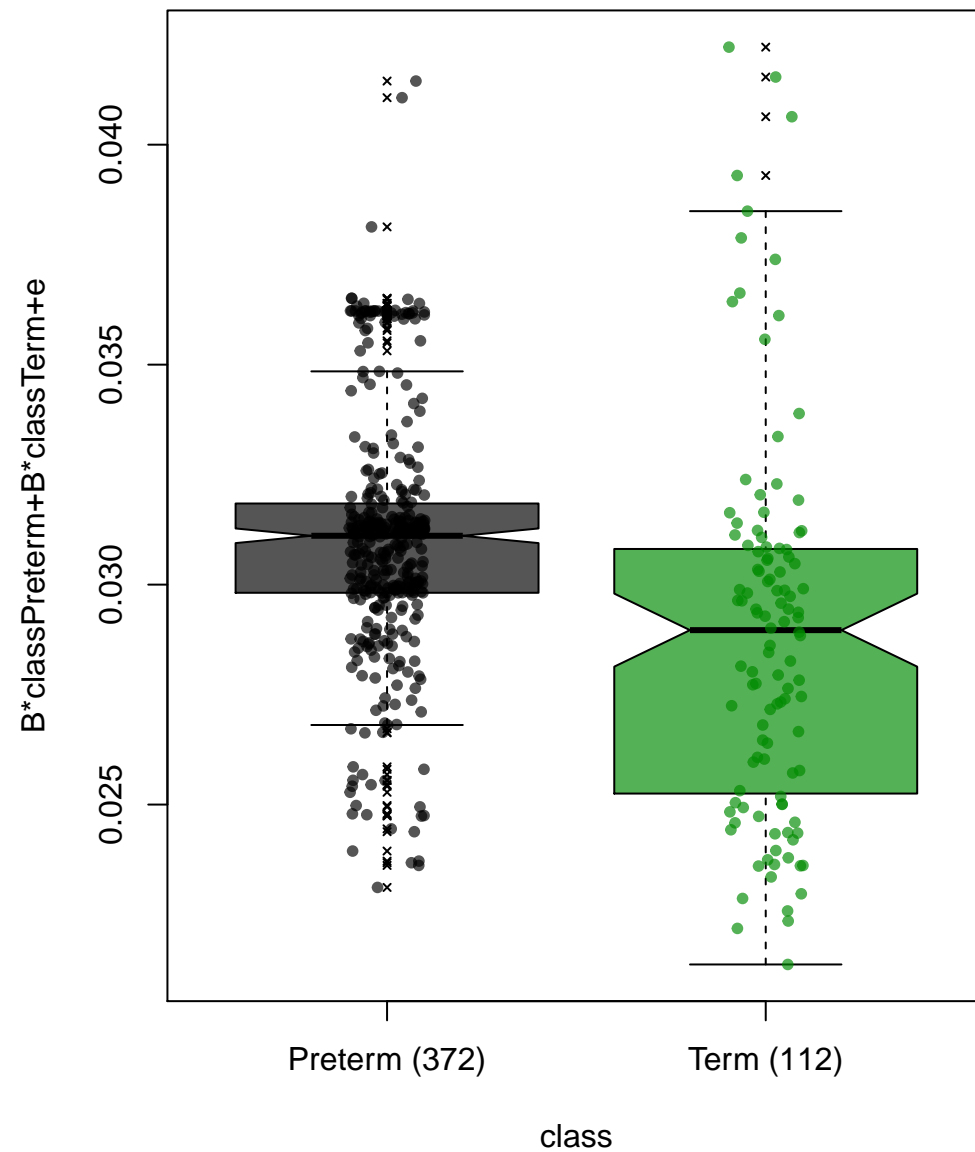



classTerm (−0.00897 sd 0.00145, p=1.22e−09, q=3.42e−09)

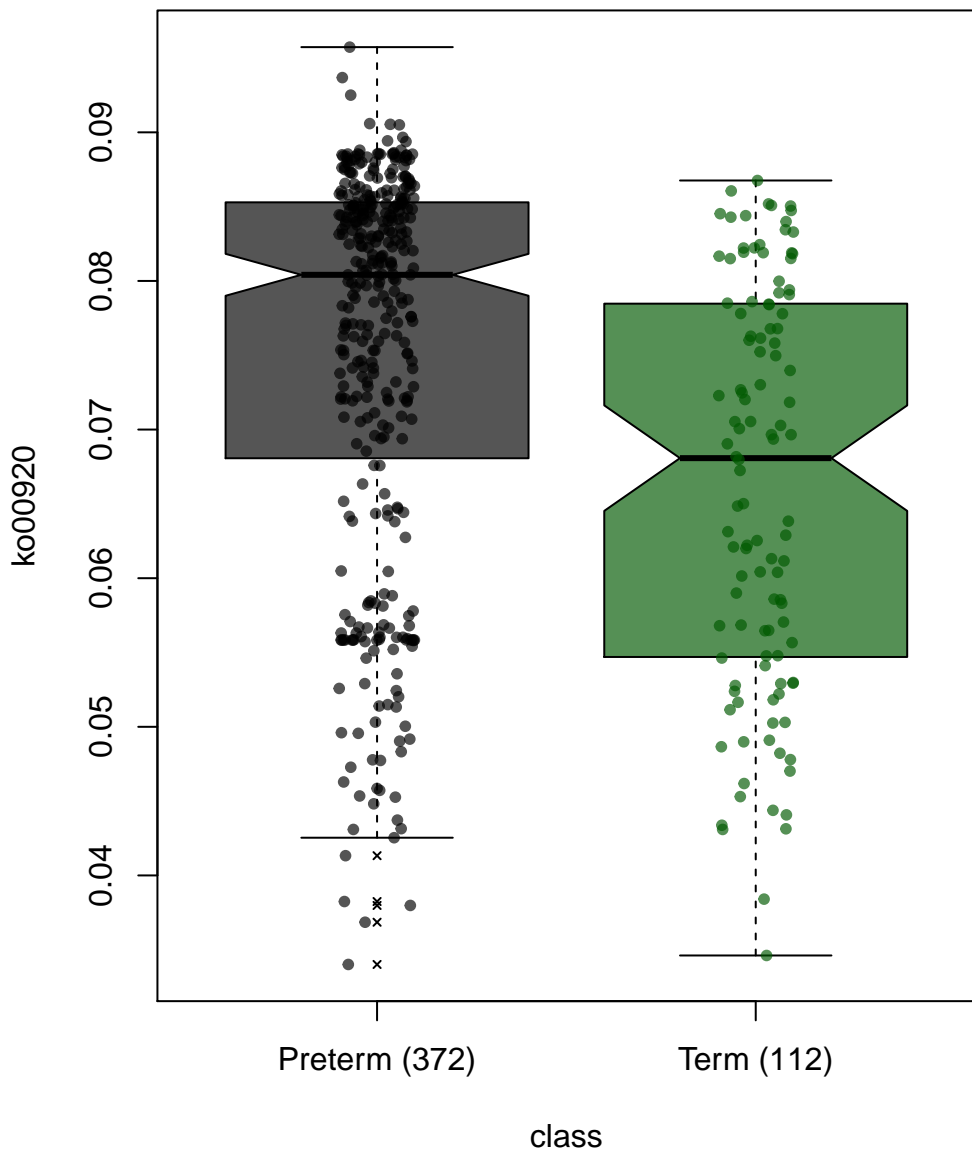

Partial Residual Plot

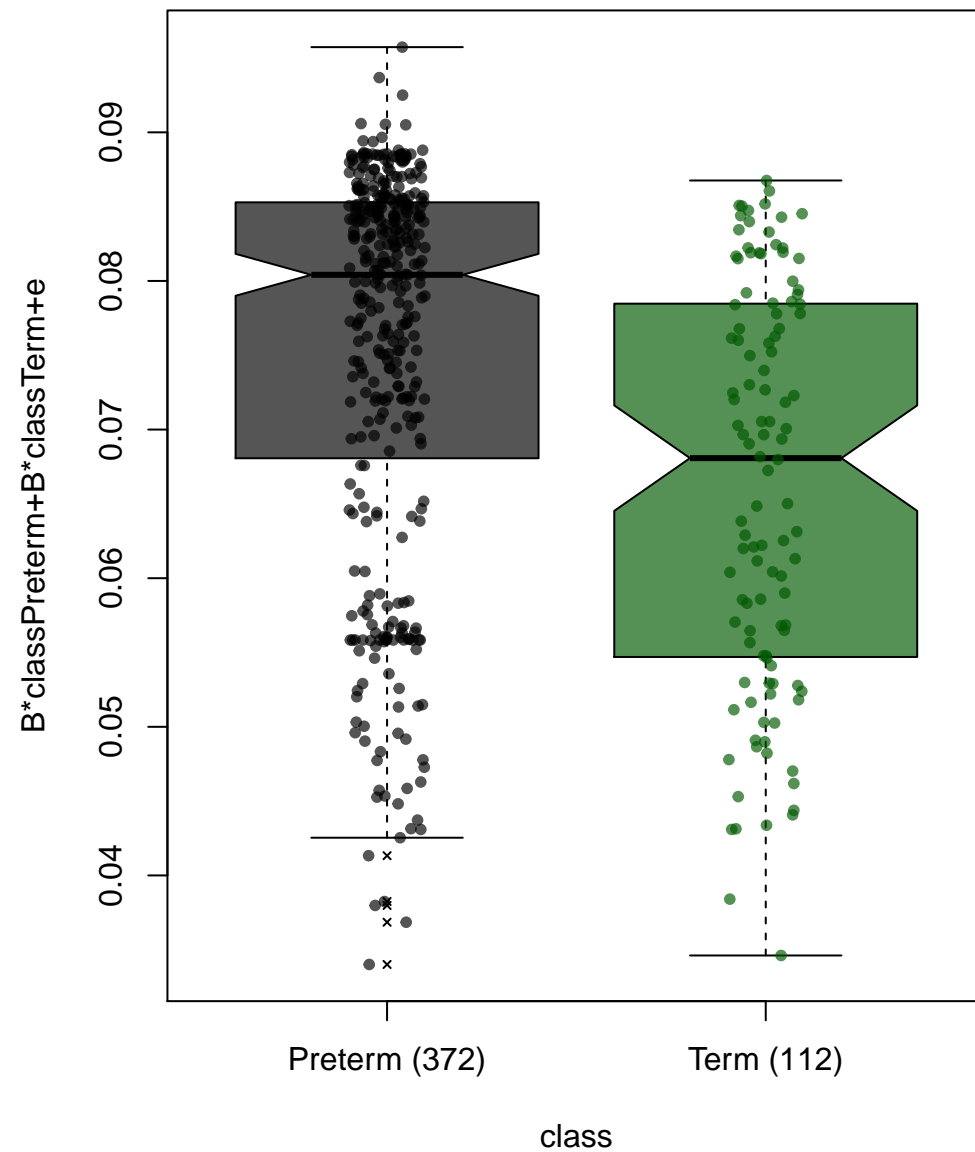

classTerm (-0.00202 sd 0.000327, p=1.39e-09, q=3.85e-09)

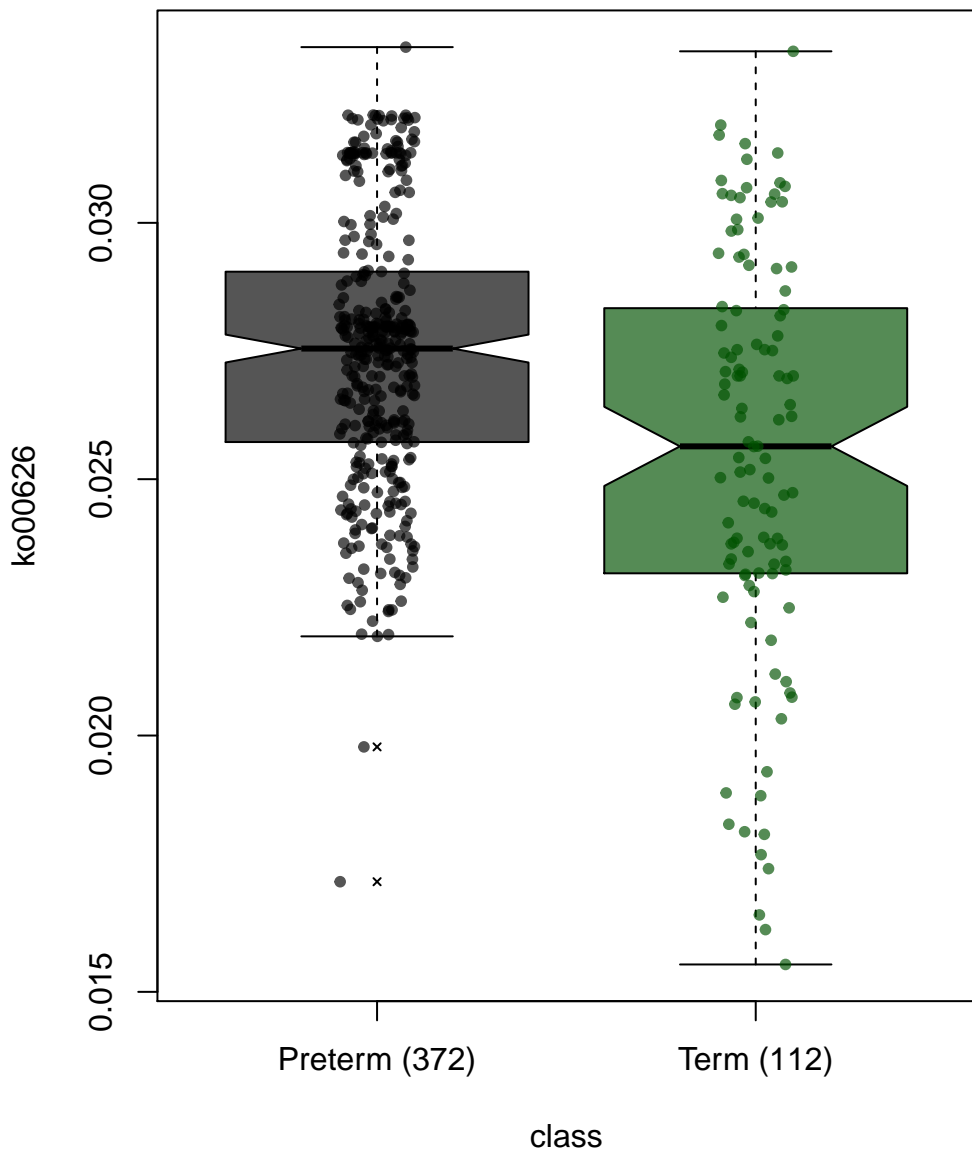

Partial Residual Plot

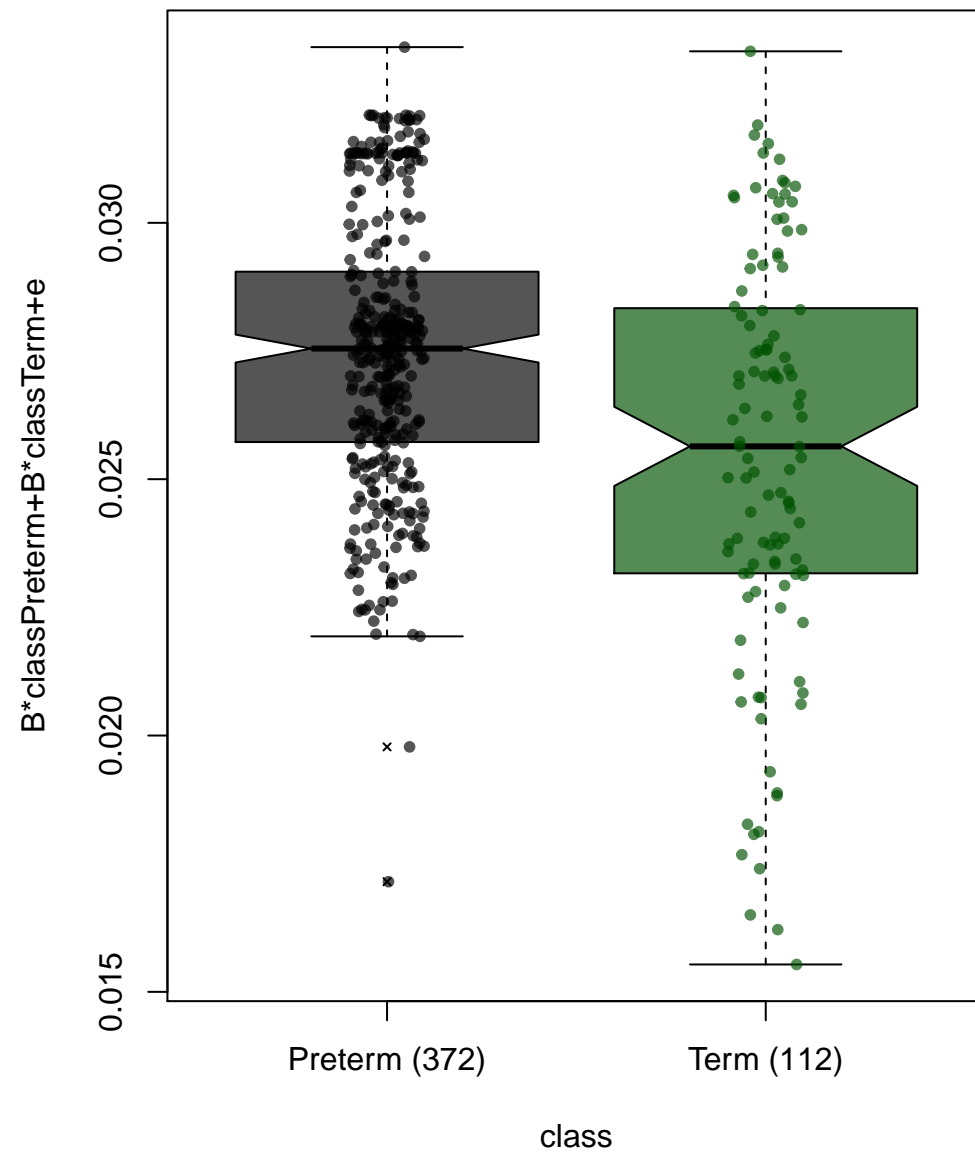

classTerm ( $-0.00783$  sd  $0.00127$ ,  $p=1.7e-09$ ,  $q=4.65e-09$ )

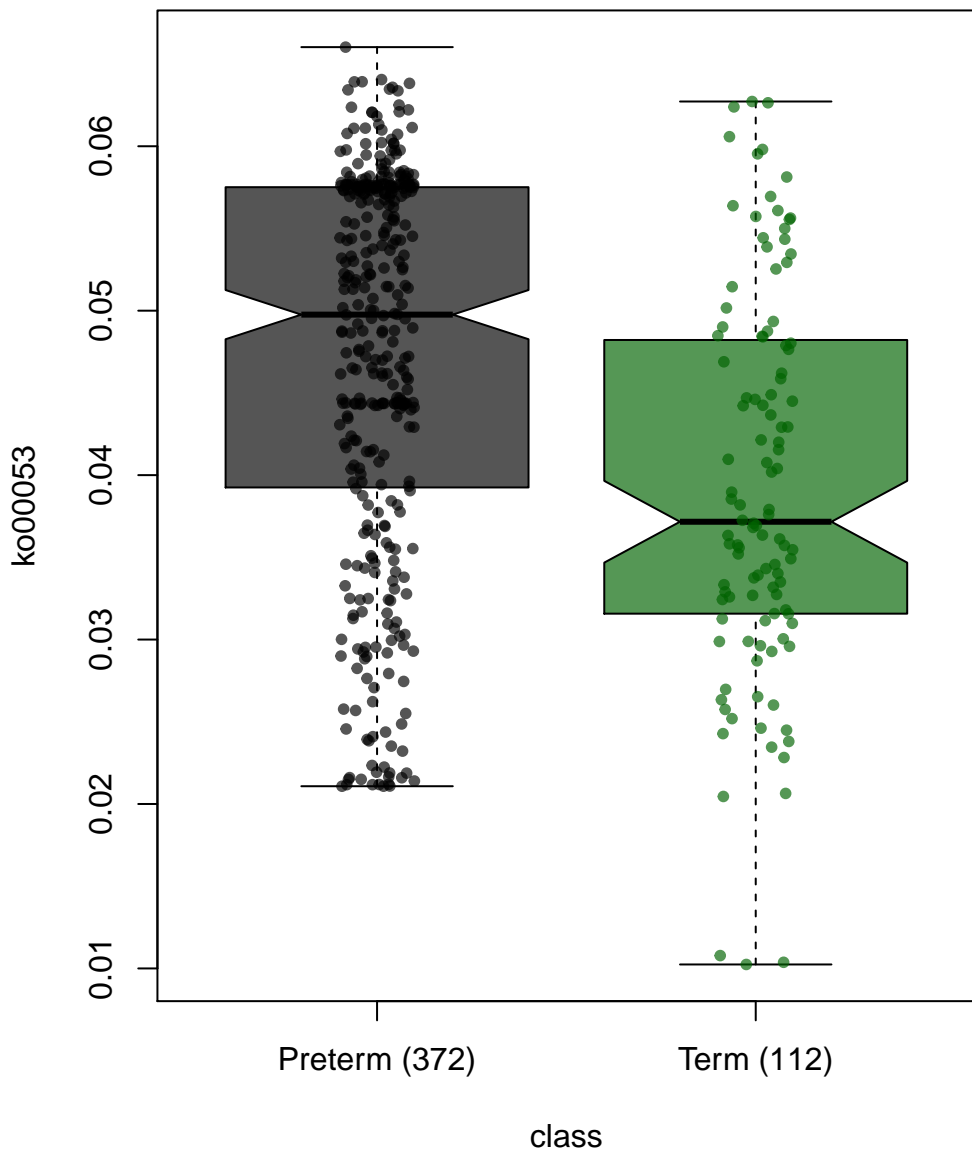

Partial Residual Plot

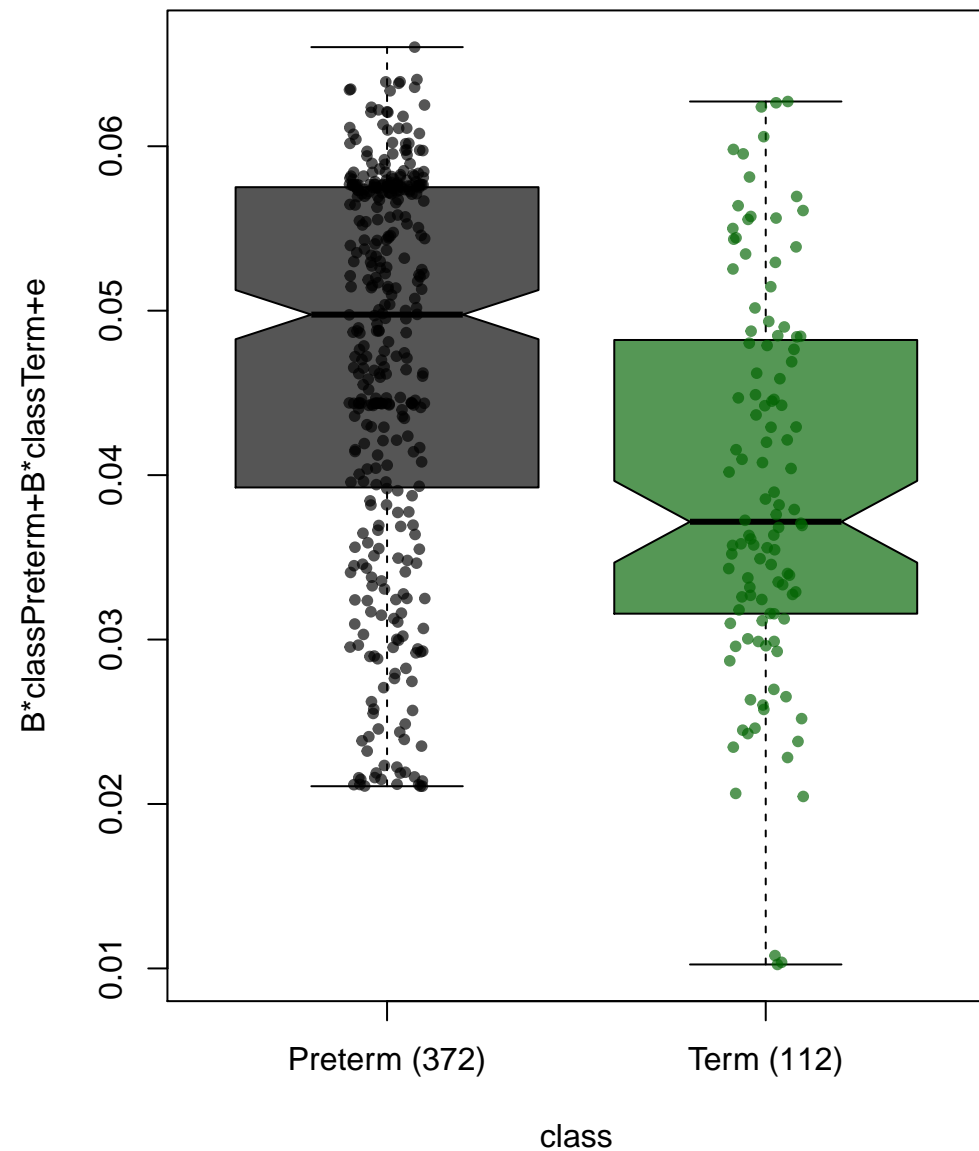

classTerm ( $-0.00851$  sd  $0.00139$ ,  $p=1.92e-09$ ,  $q=5.2e-09$ )

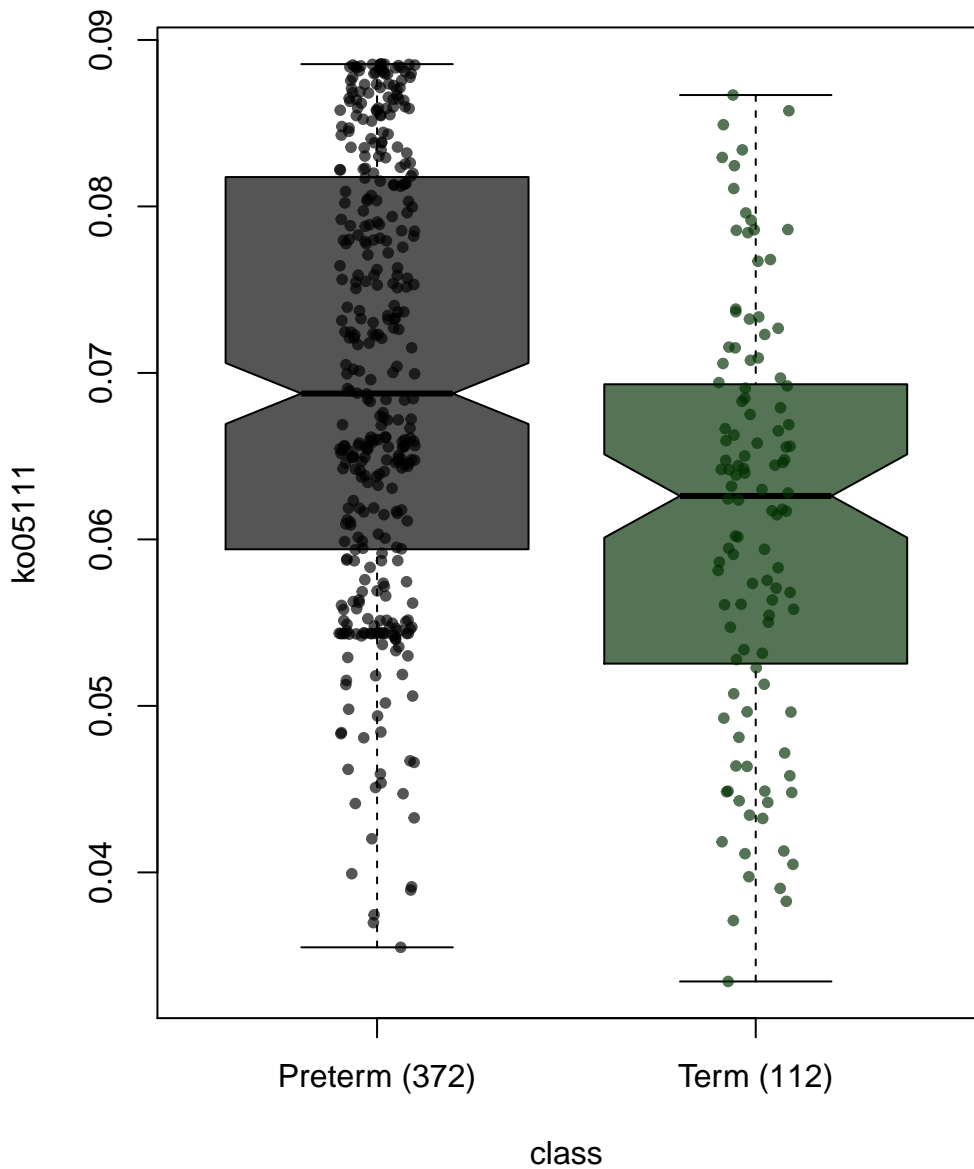

Partial Residual Plot

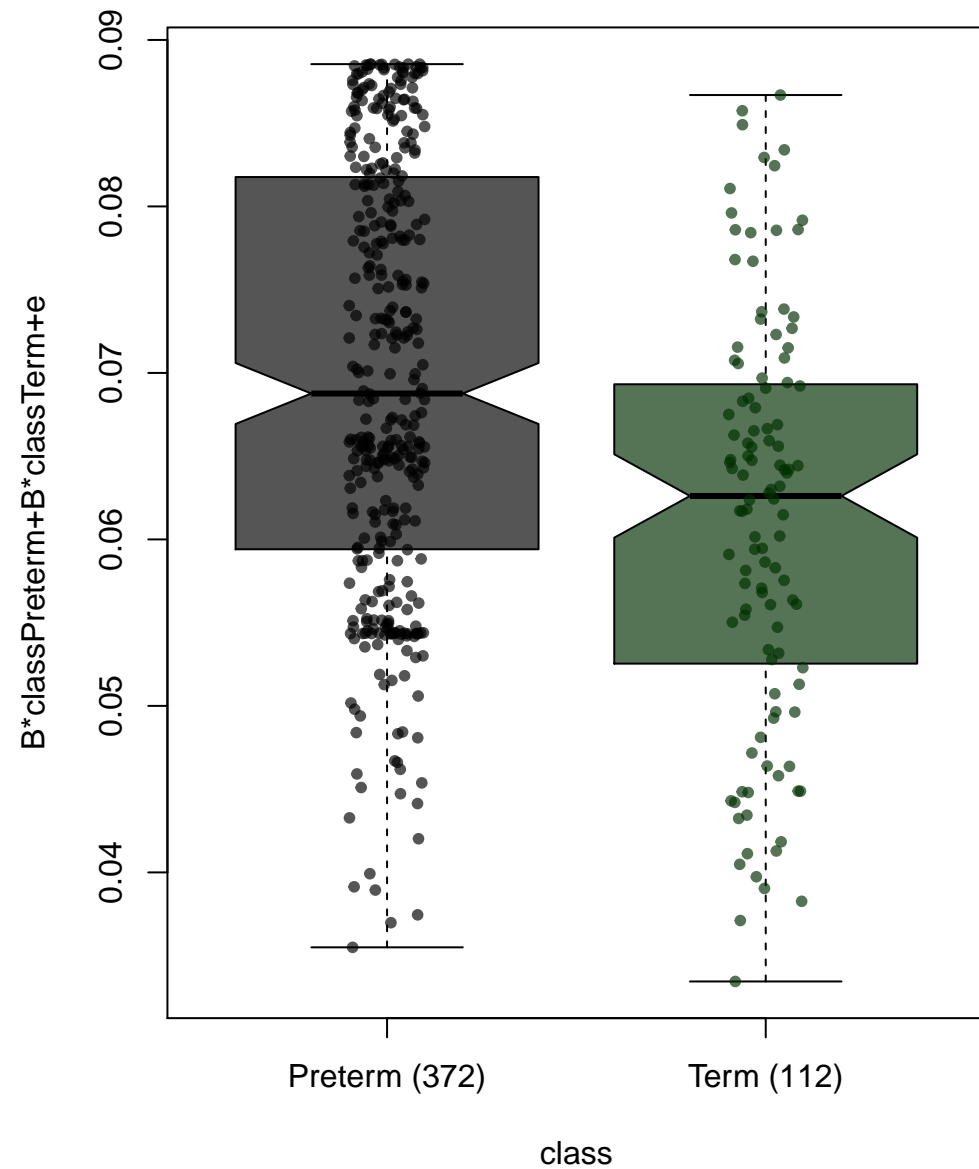

classTerm (0.00345 sd 0.000566, p=2.24e-09, q=6.01e-09)

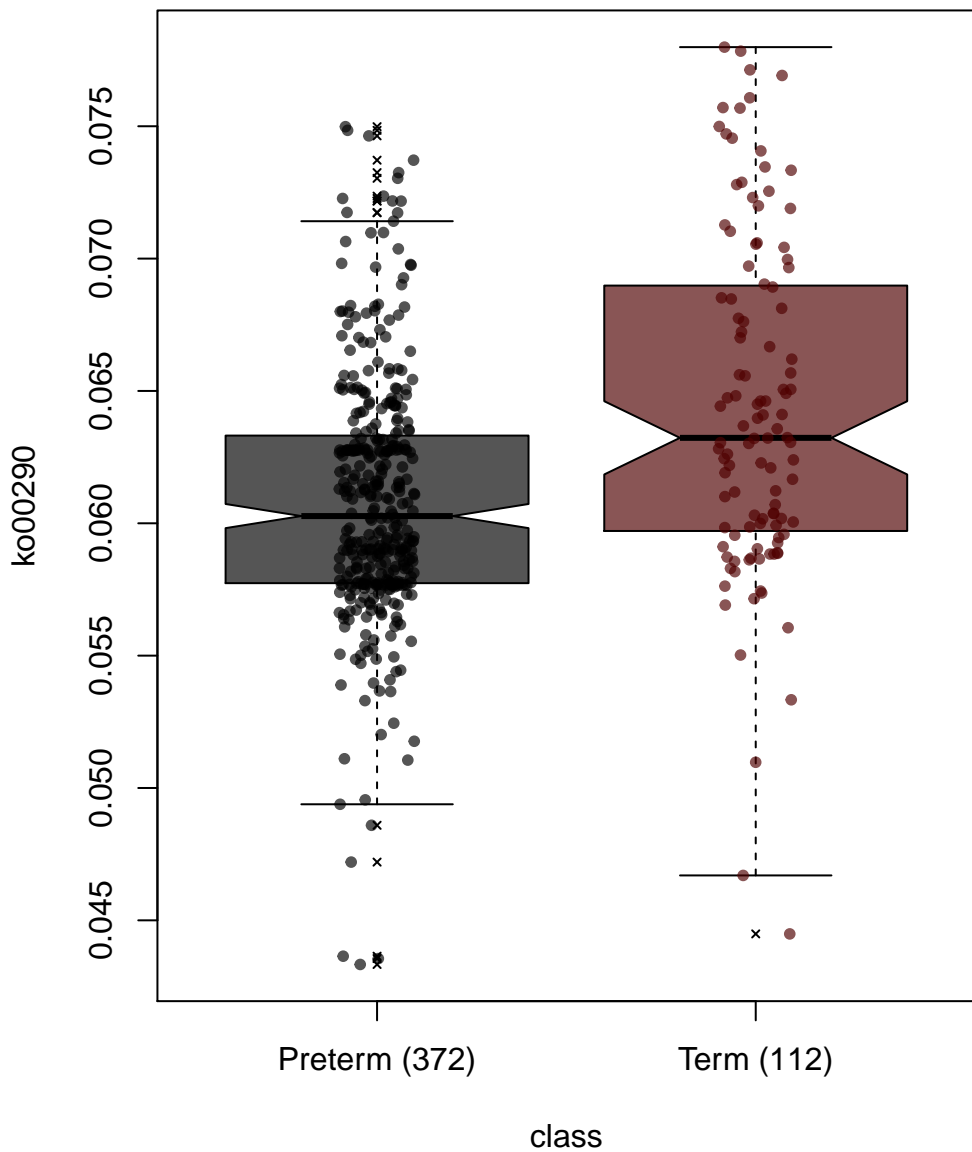

Partial Residual Plot

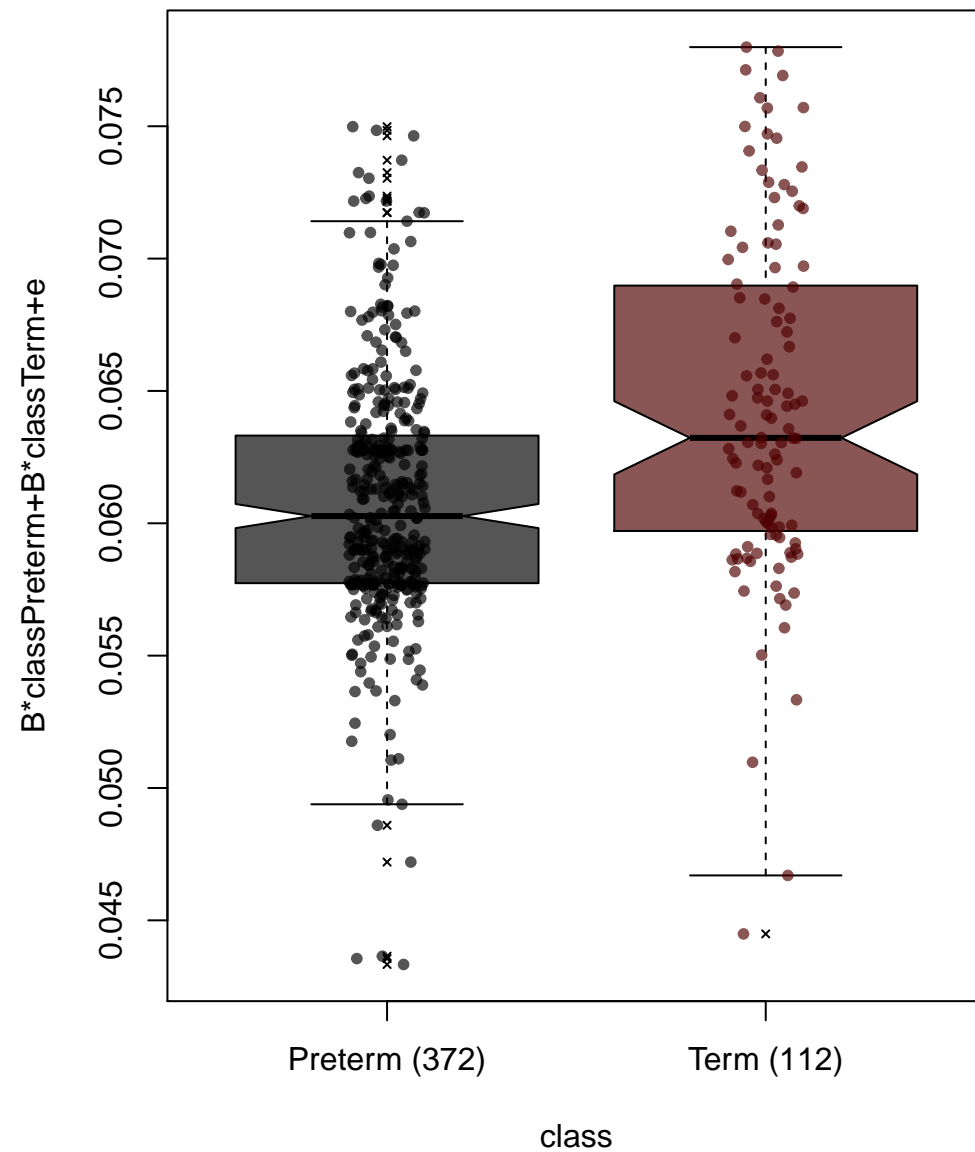

classTerm (-0.00487 sd 0.000803, p=2.7e-09, q=7.17e-09)

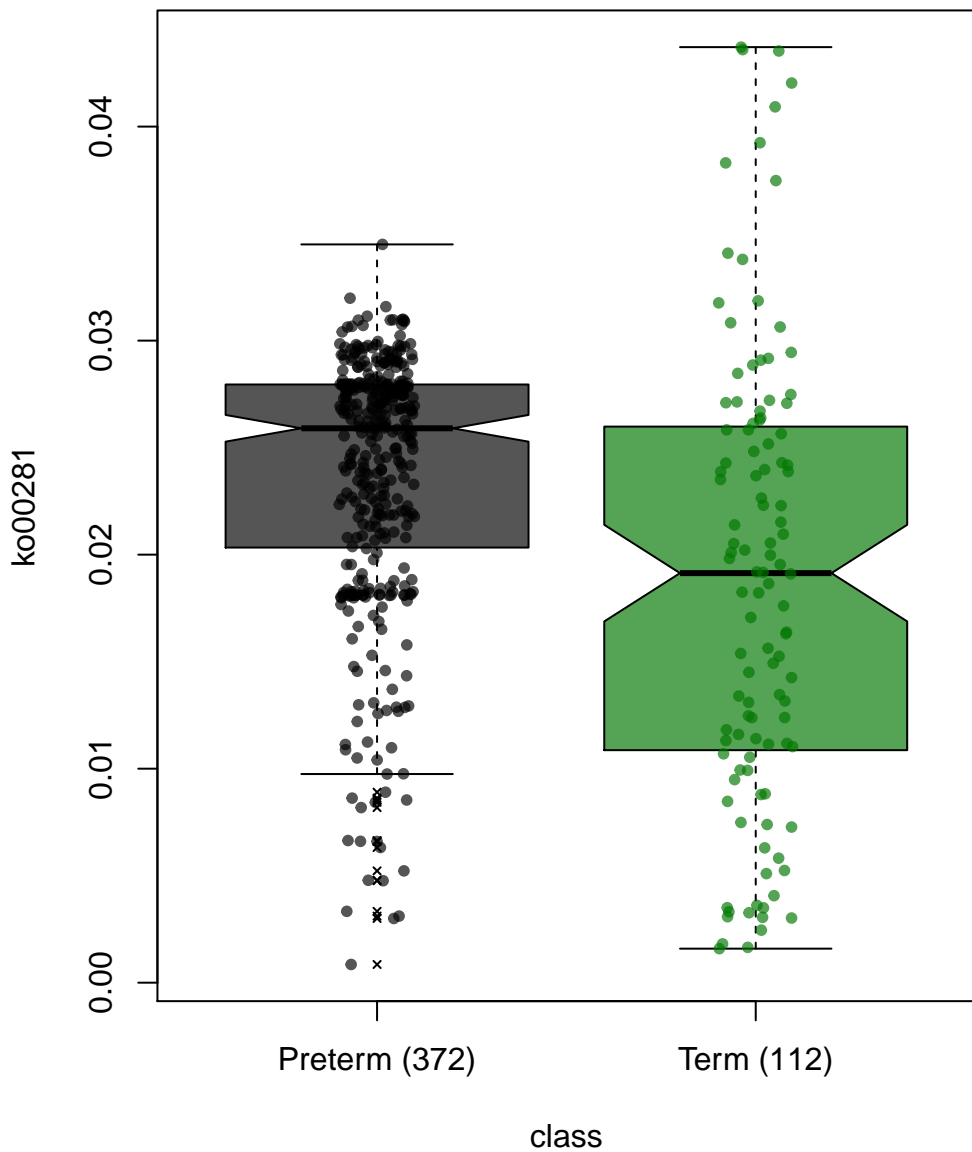

Partial Residual Plot

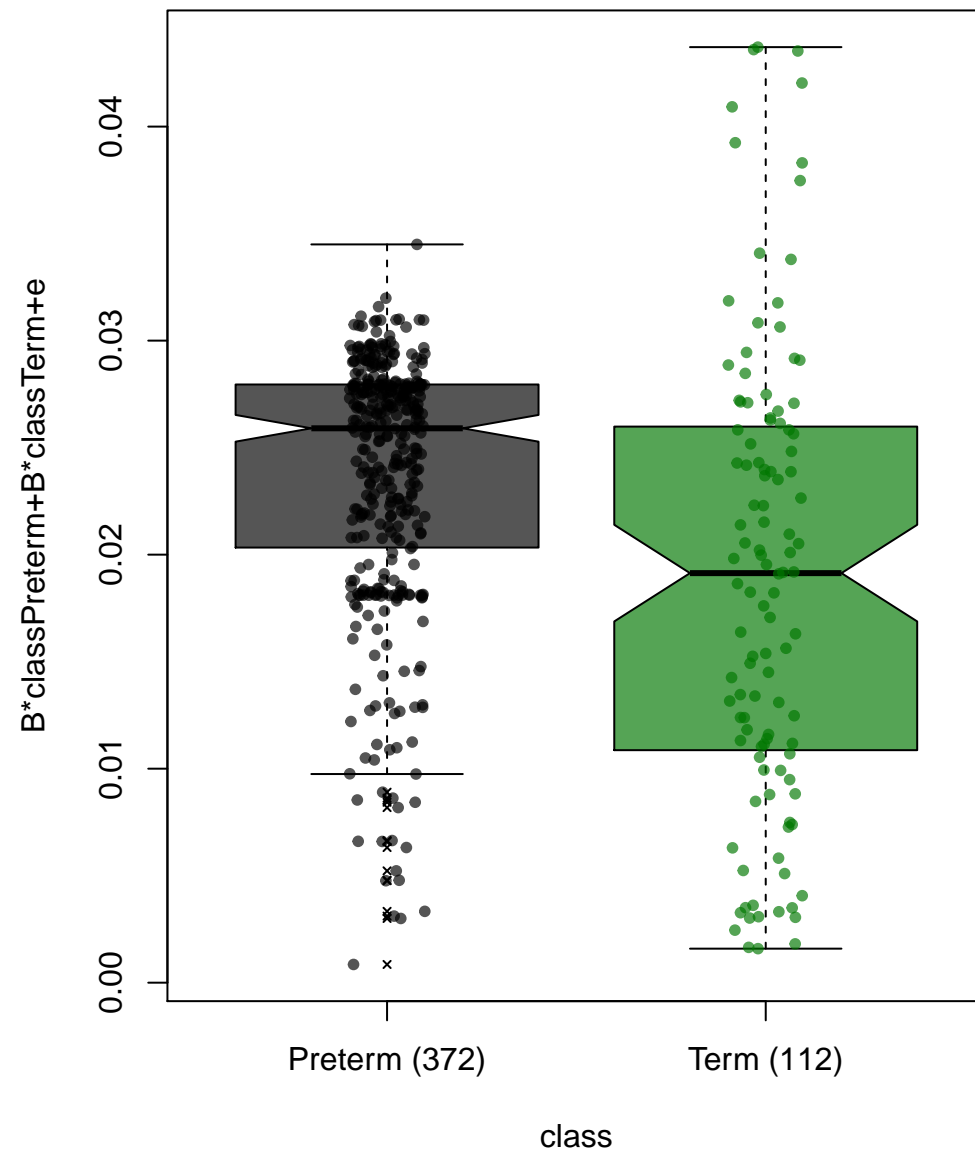

classTerm (−0.00347 sd 0.000573, p=2.85e−09, q=7.51e−09)

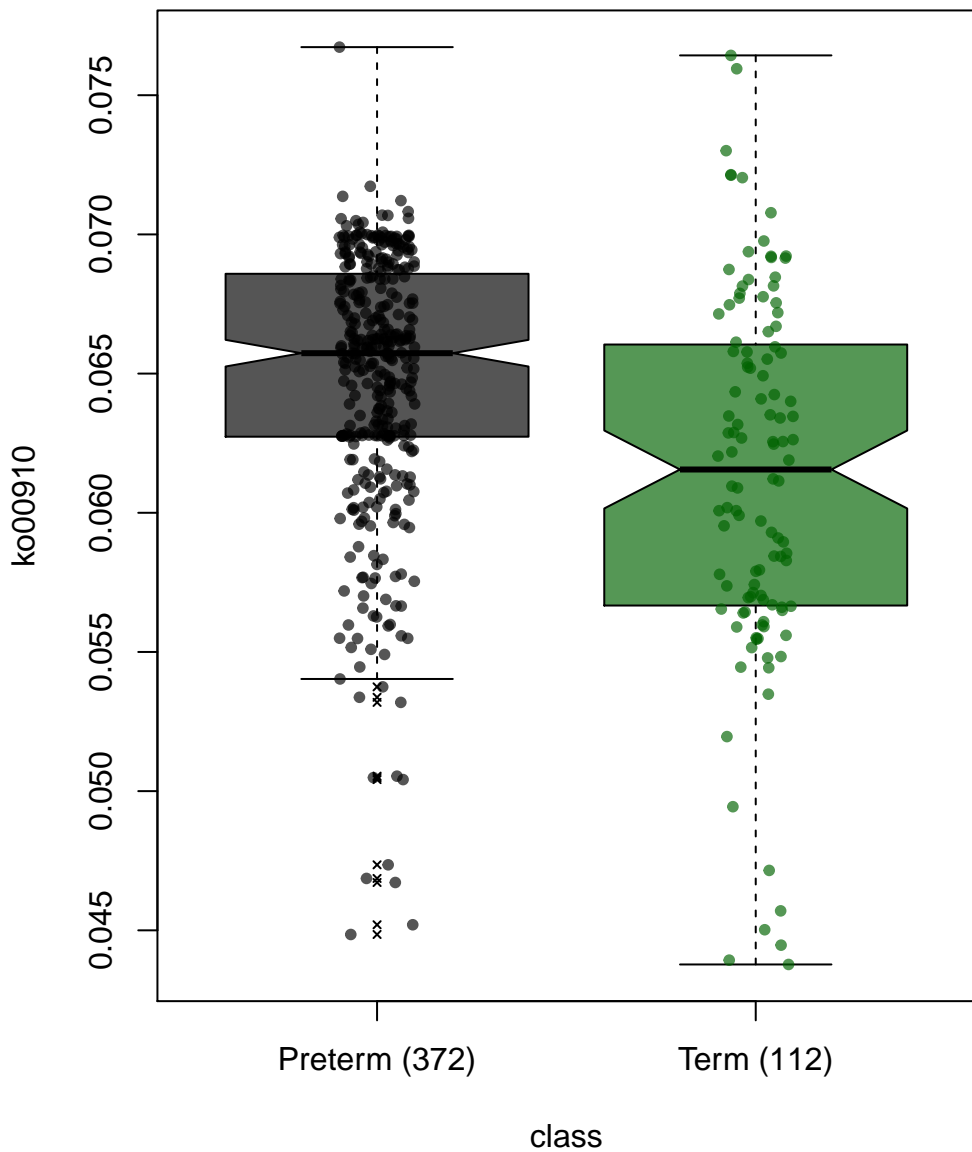

Partial Residual Plot

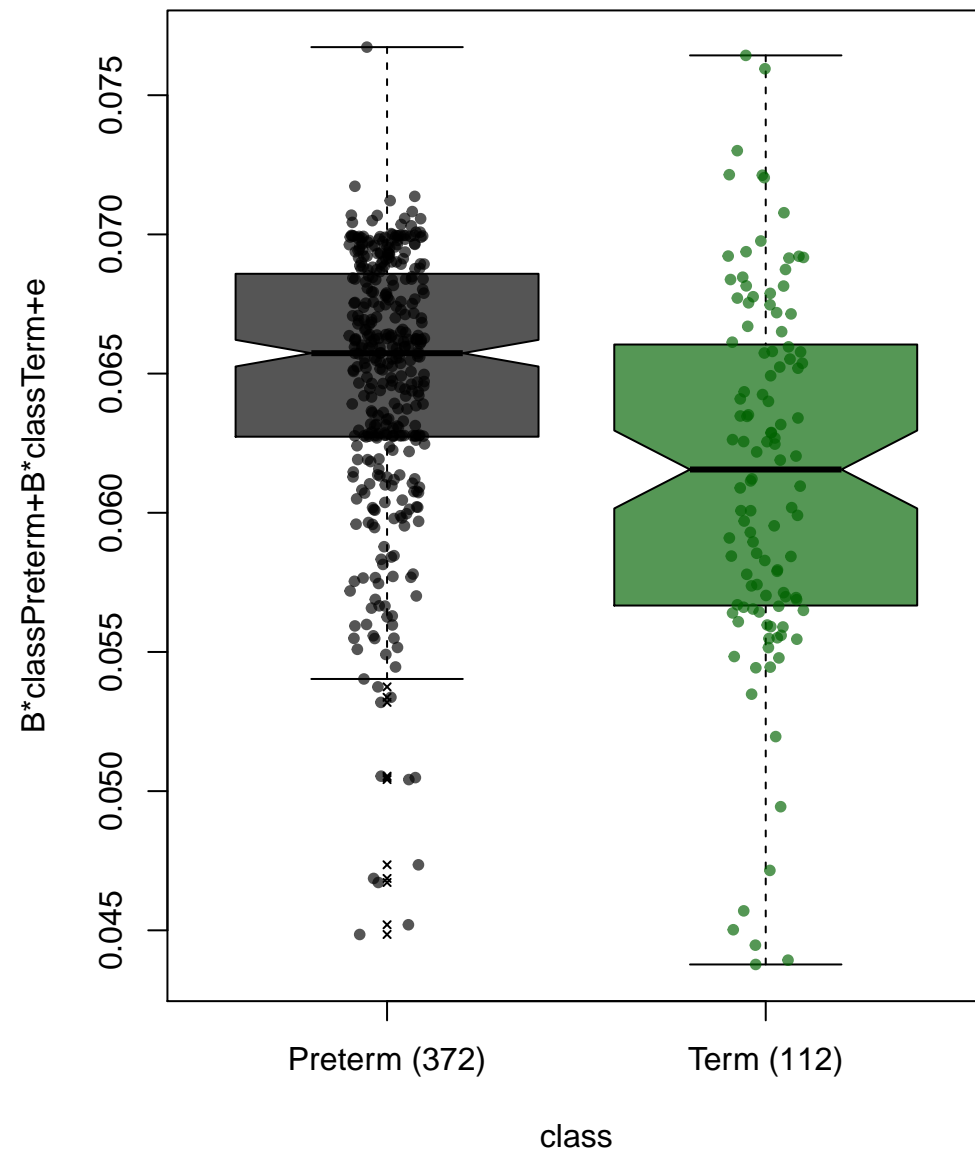

classTerm (−0.00489 sd 0.000809, p=3.04e−09, q=7.94e−09)

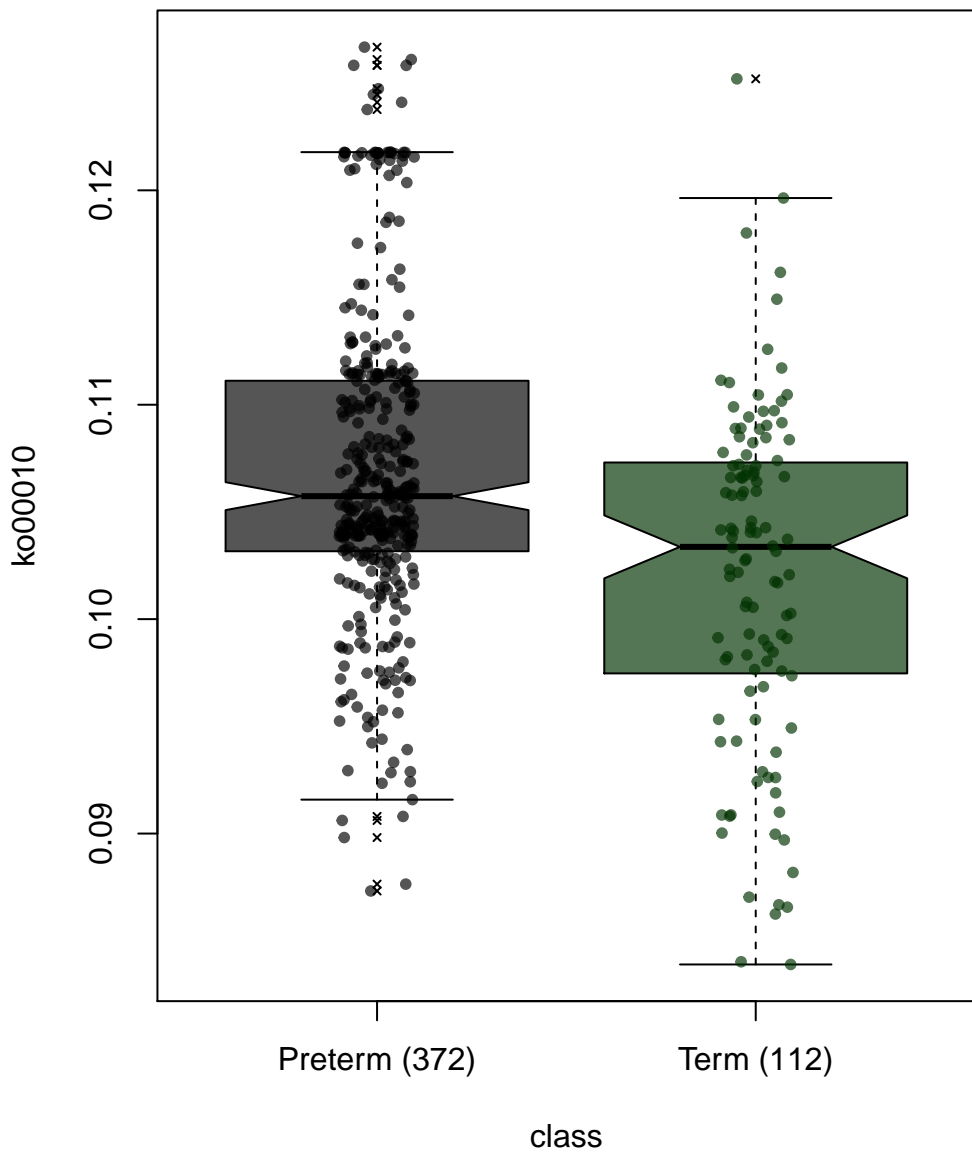

Partial Residual Plot

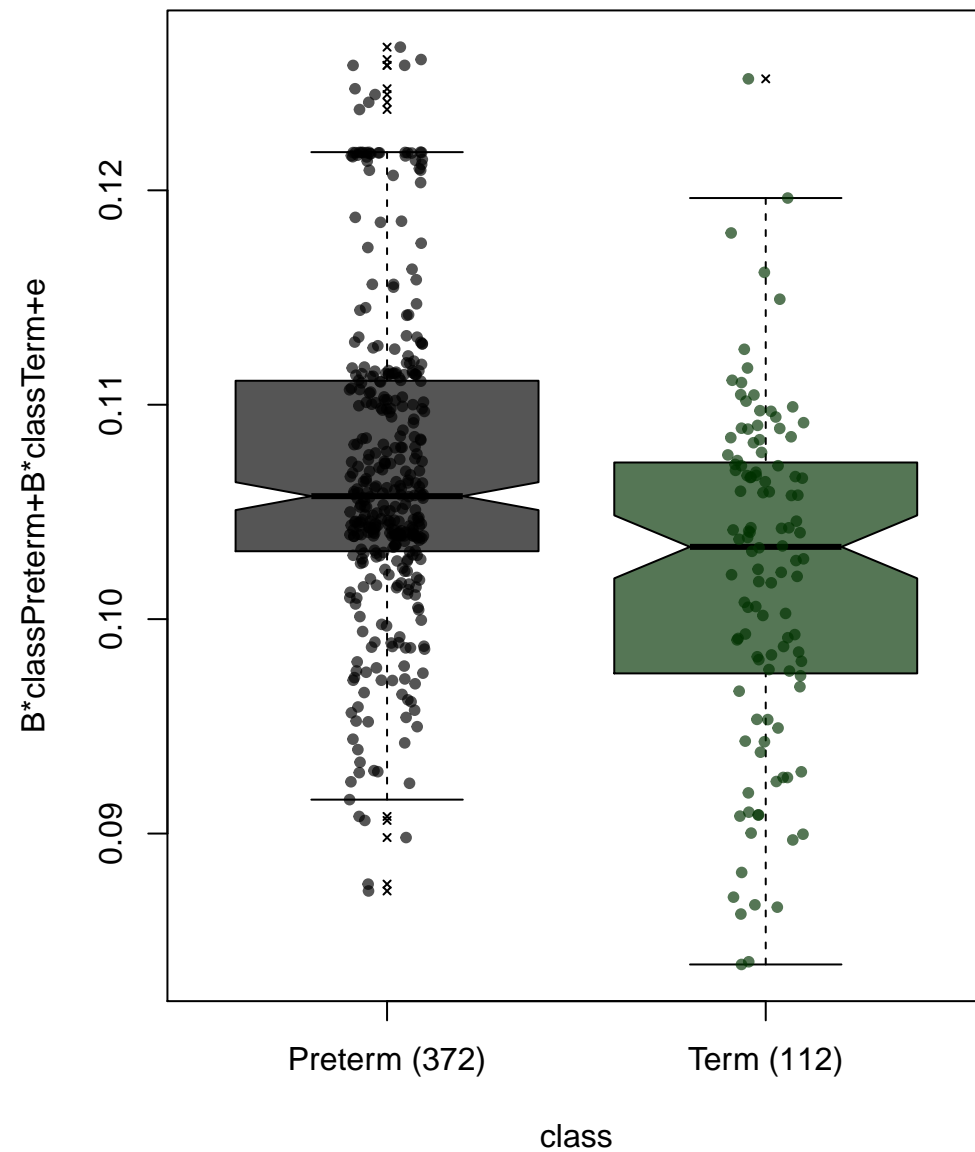



classTerm (-0.00354 sd 0.000594, p=4.88e-09, q=1.26e-08)

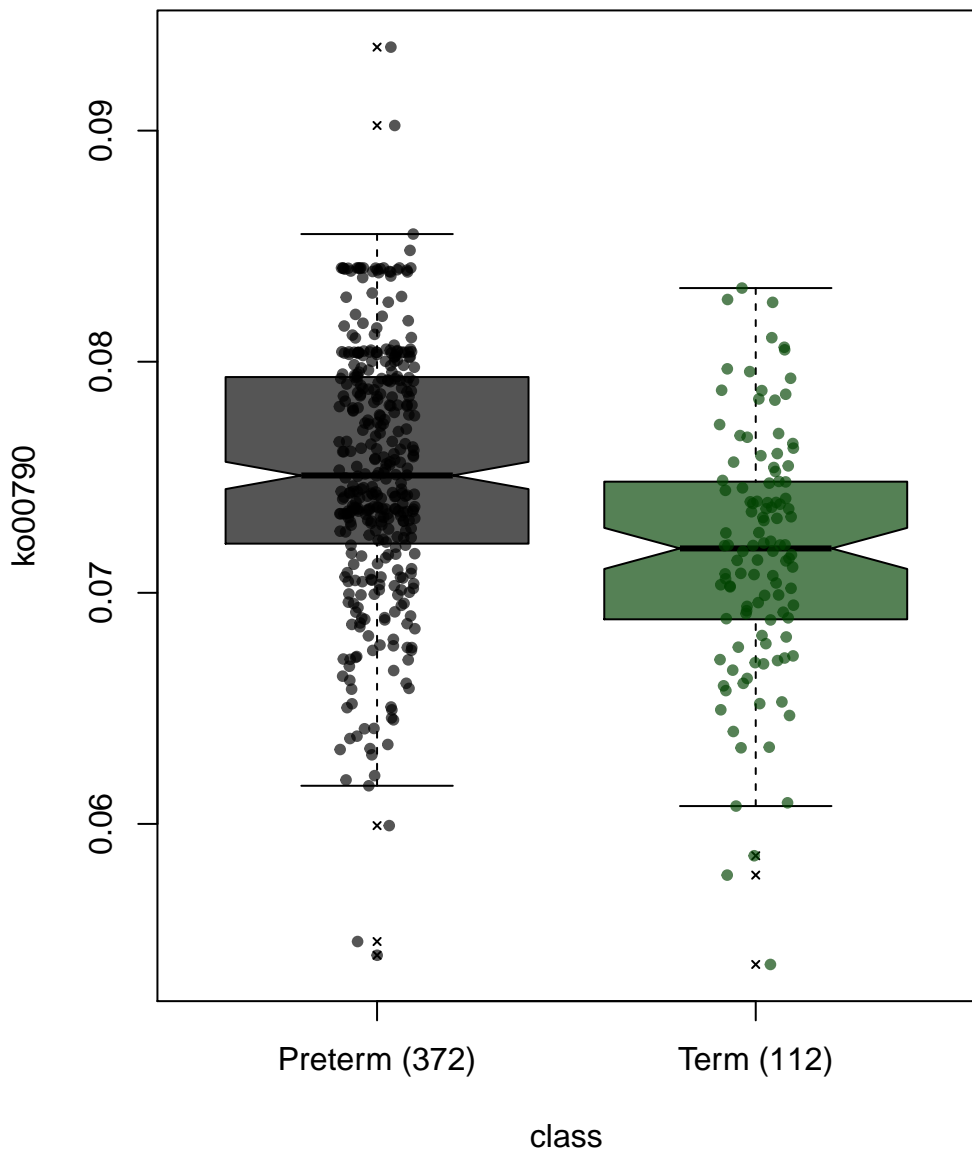

Partial Residual Plot

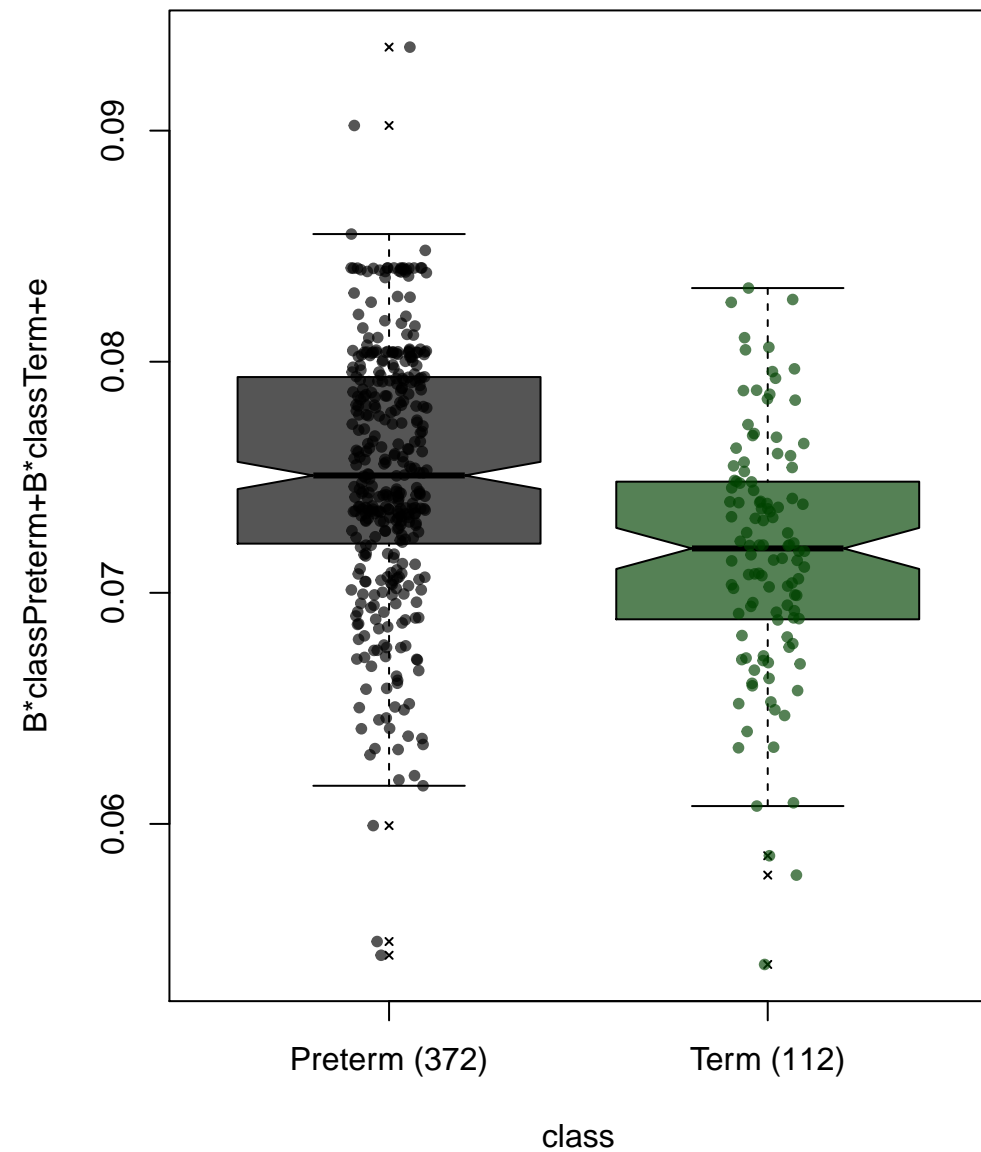

classTerm (0.00388 sd 0.000654, p=5.65e-09, q=1.45e-08)

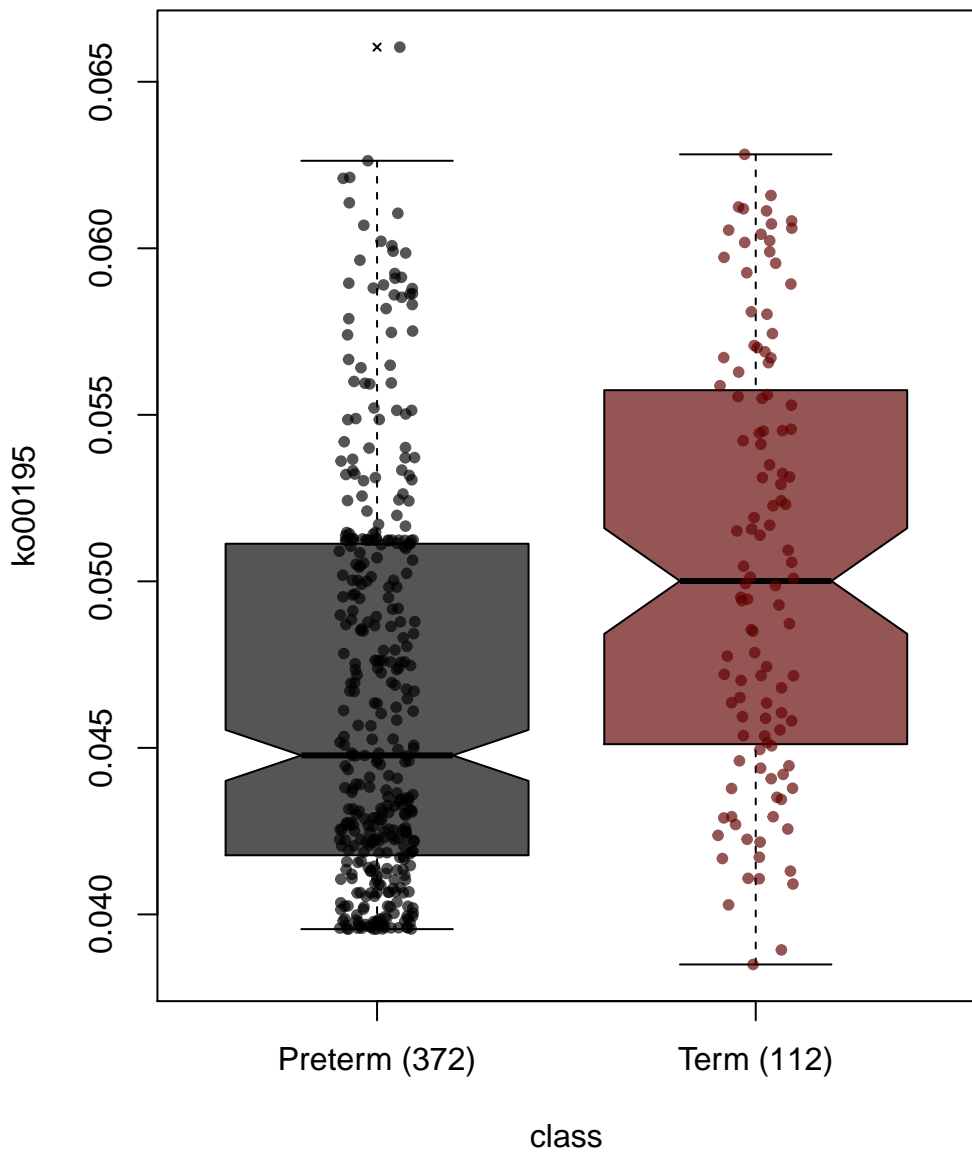

Partial Residual Plot

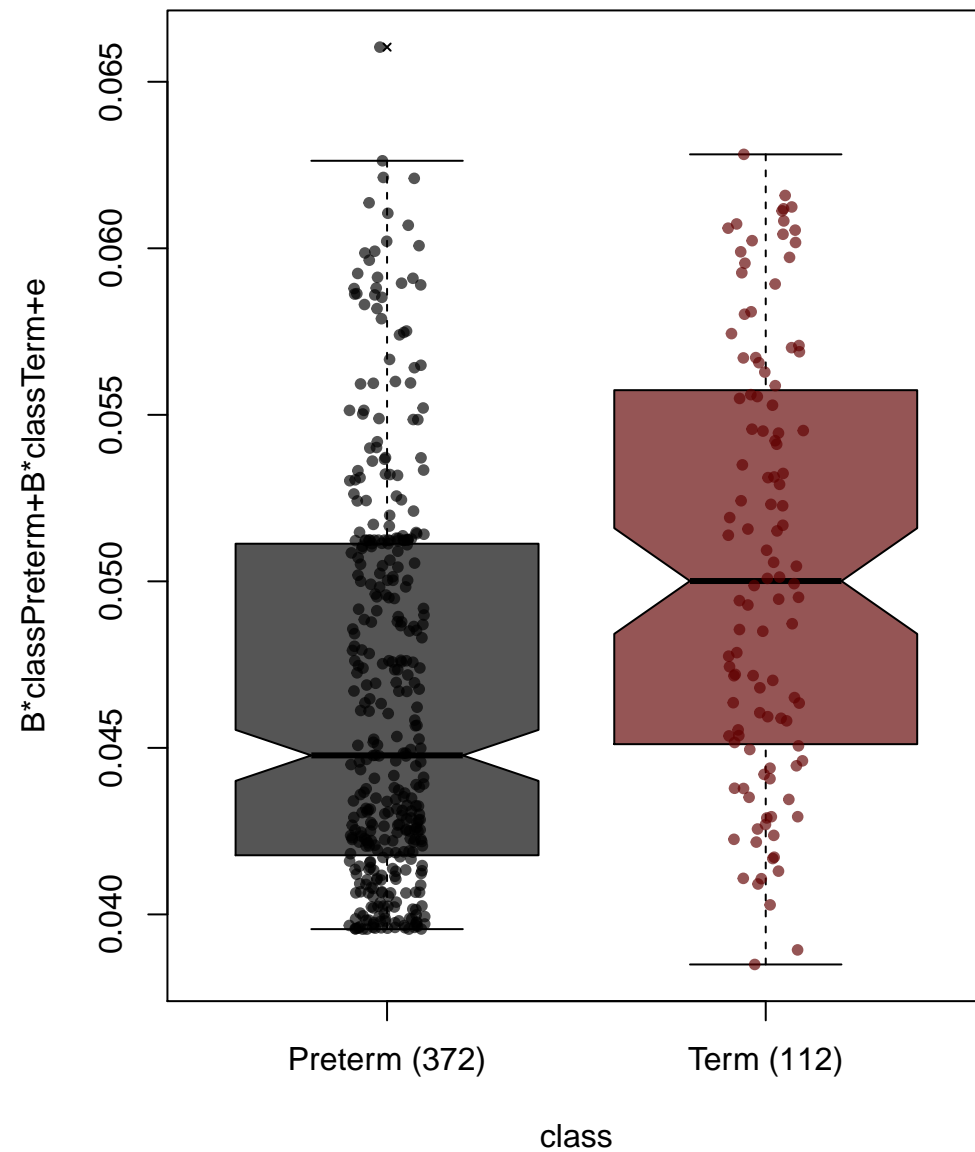

classTerm (0.00271 sd 0.000458, p=6.39e-09, q=1.62e-08)

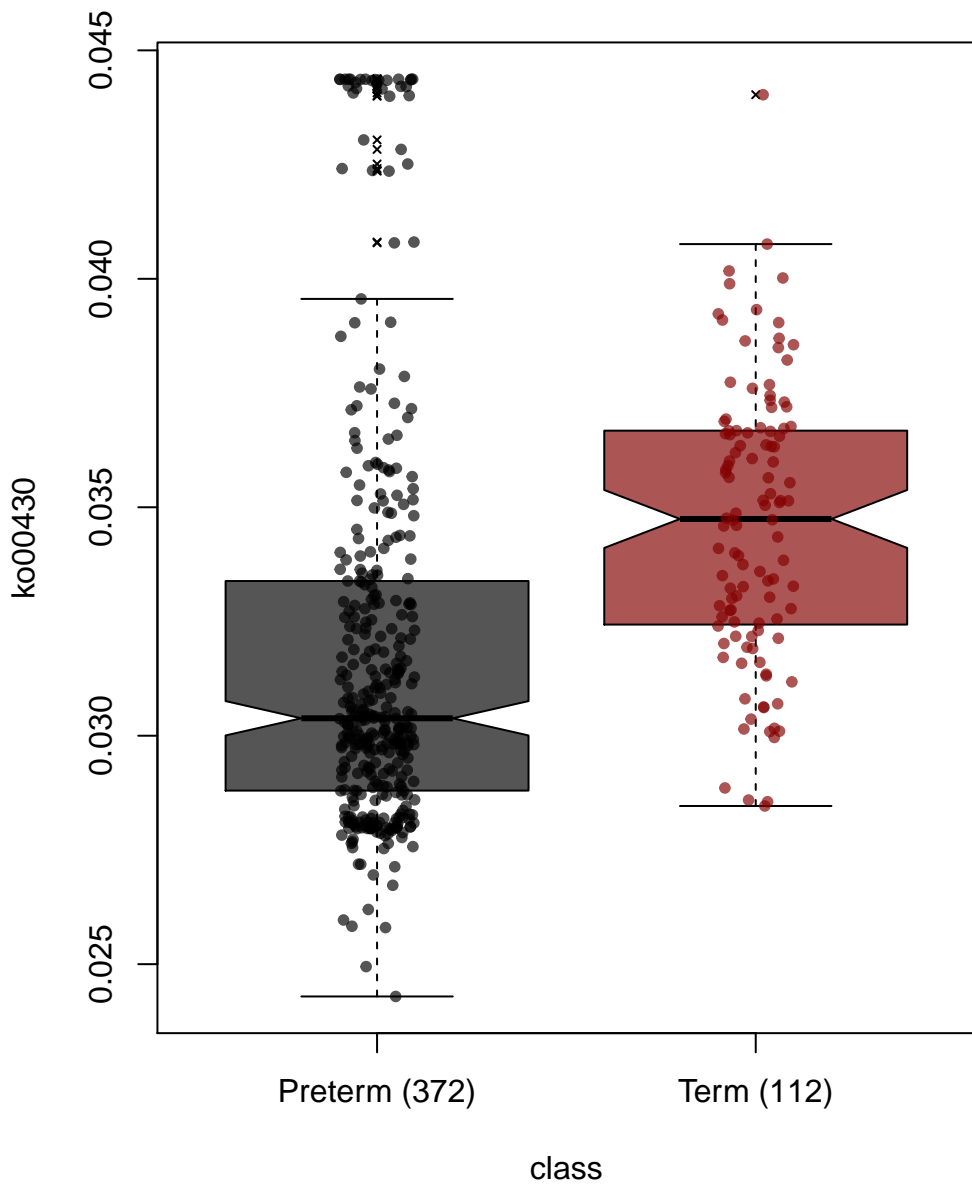

Partial Residual Plot

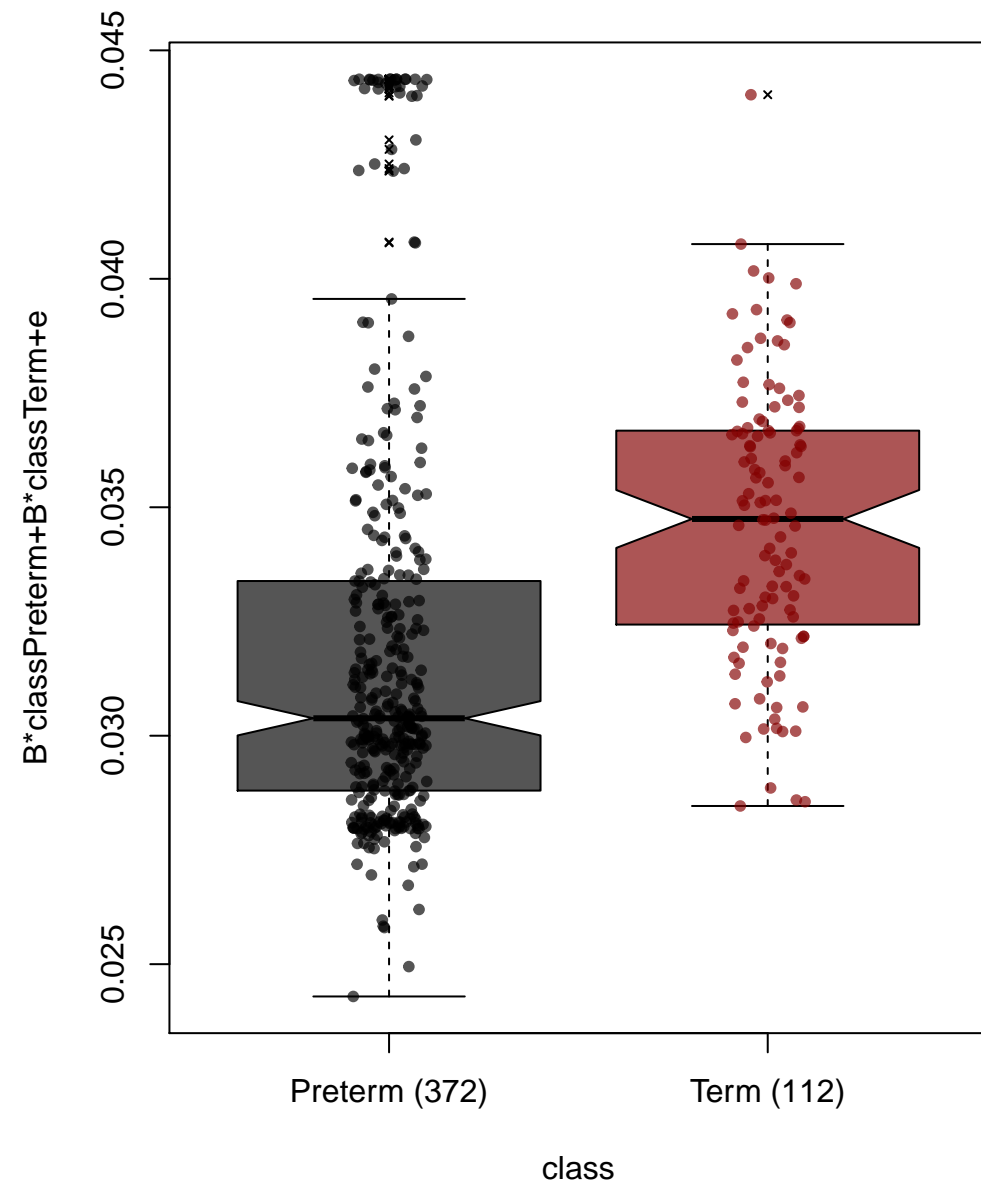

classTerm (0.00254 sd 0.000431, p=7e-09, q=1.76e-08)

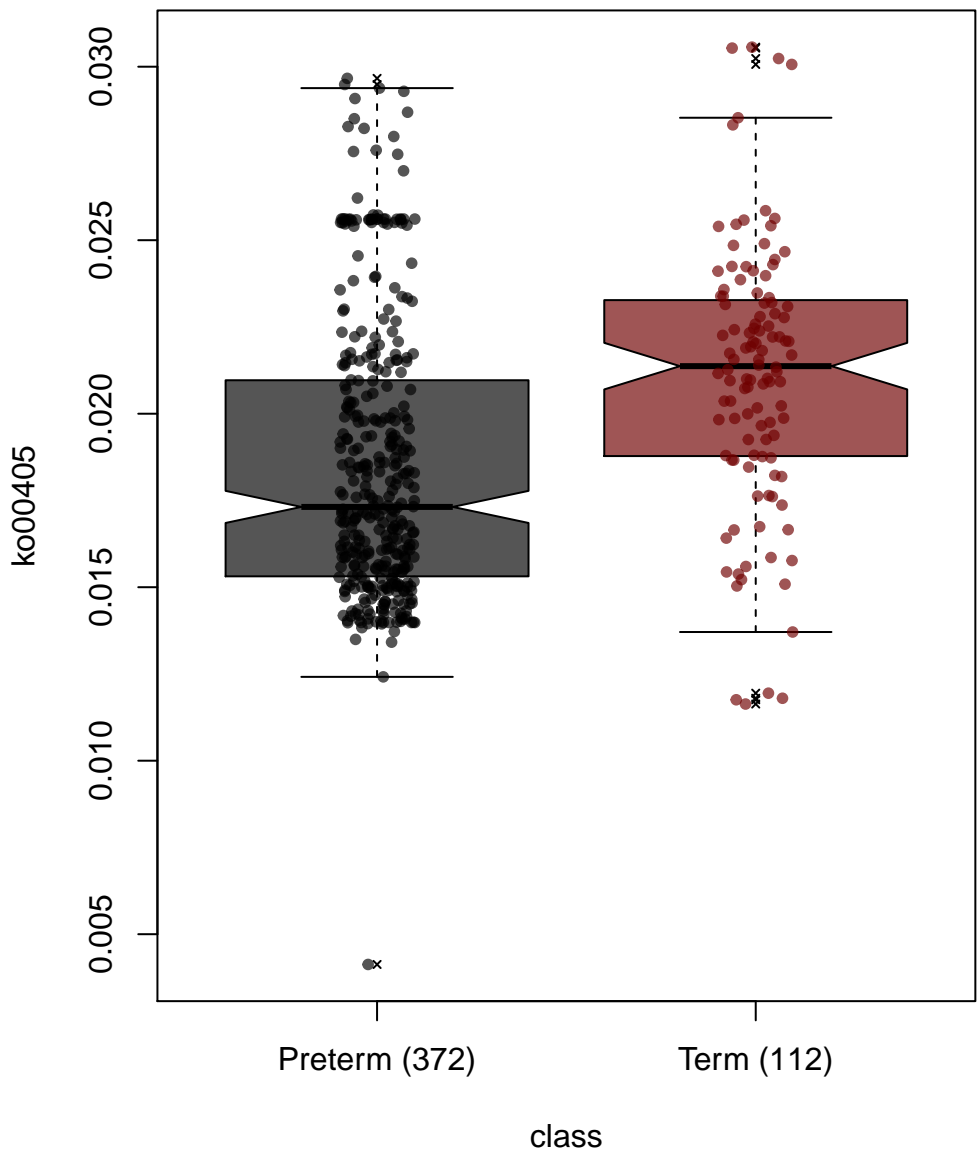

Partial Residual Plot

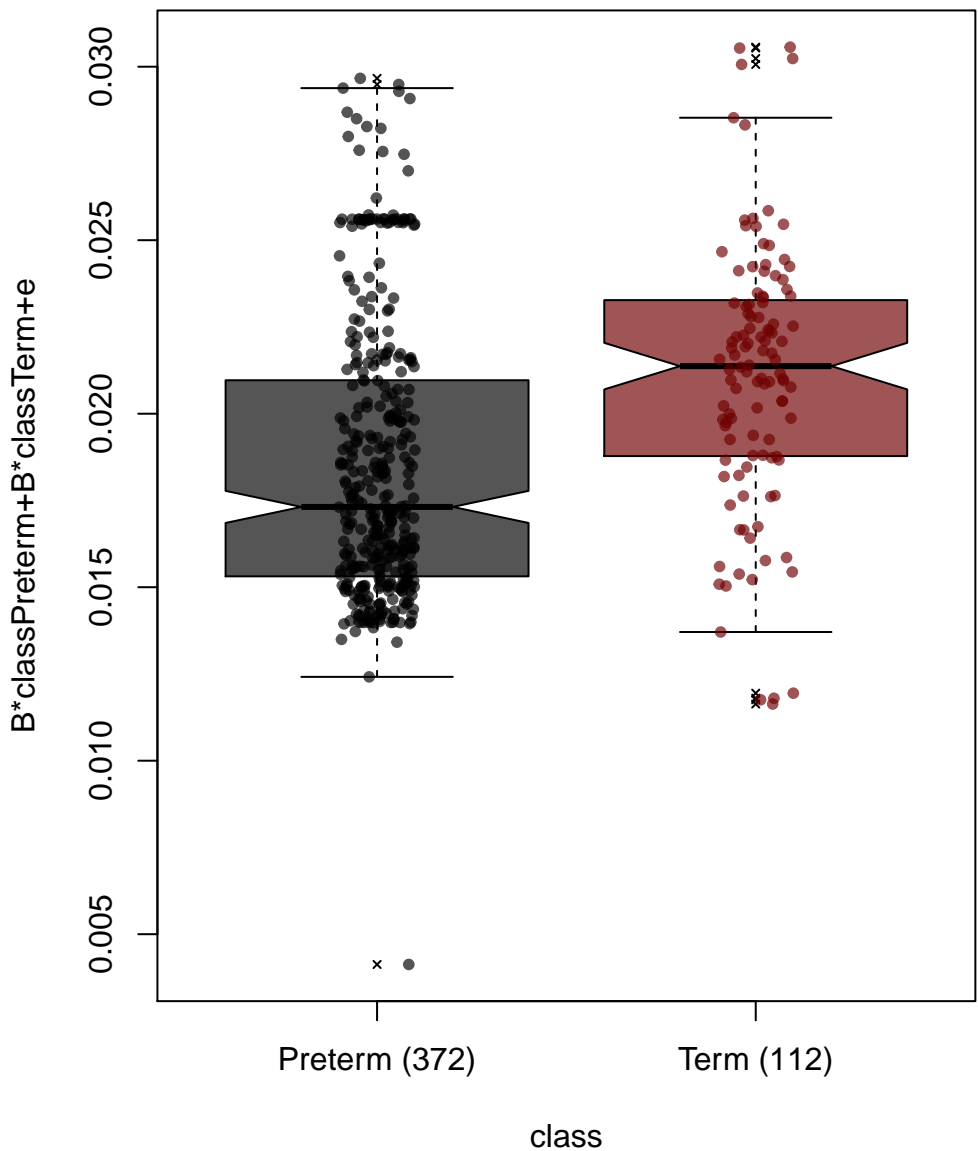

classTerm ( $-0.00532$  sd  $0.000904$ ,  $p=7.34e-09$ ,  $q=1.83e-08$ )

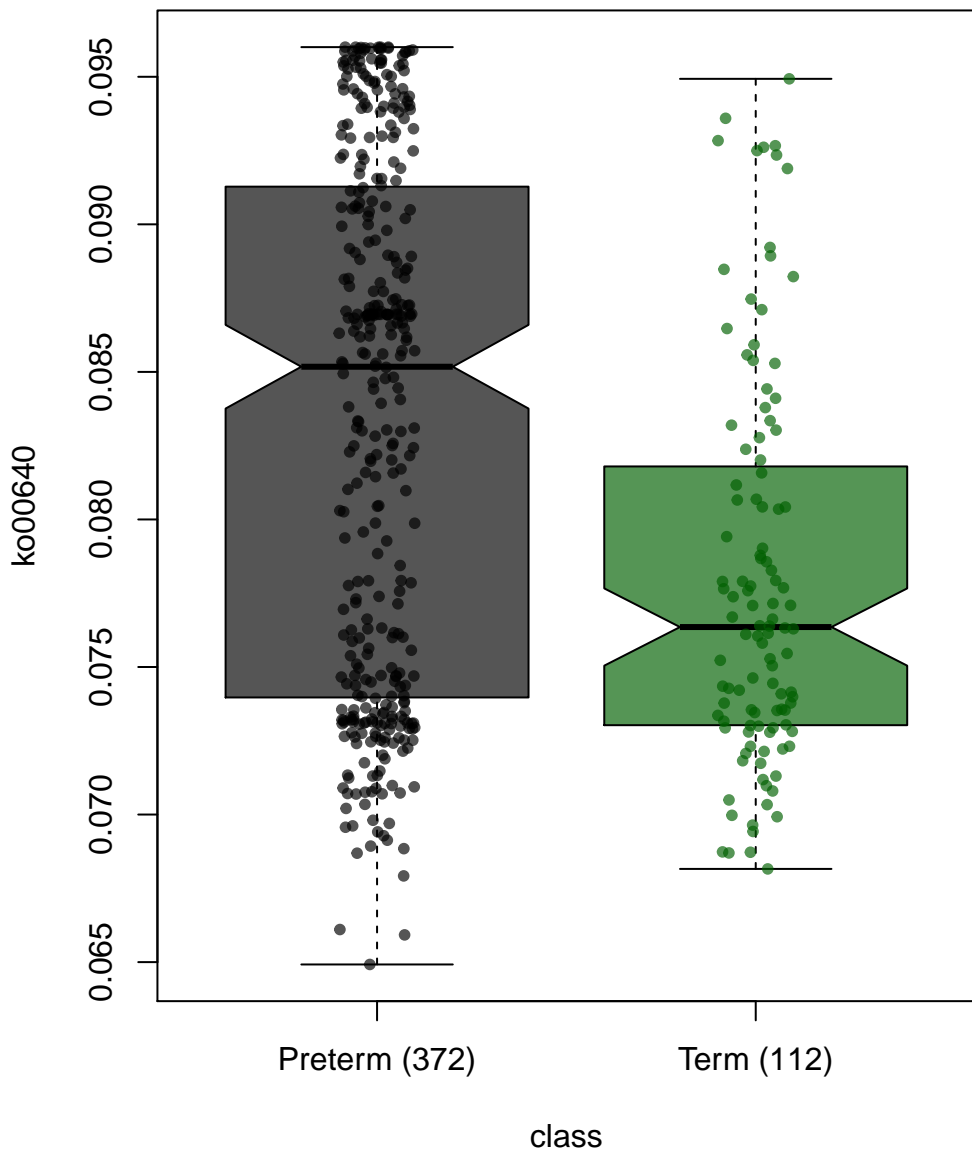

Partial Residual Plot

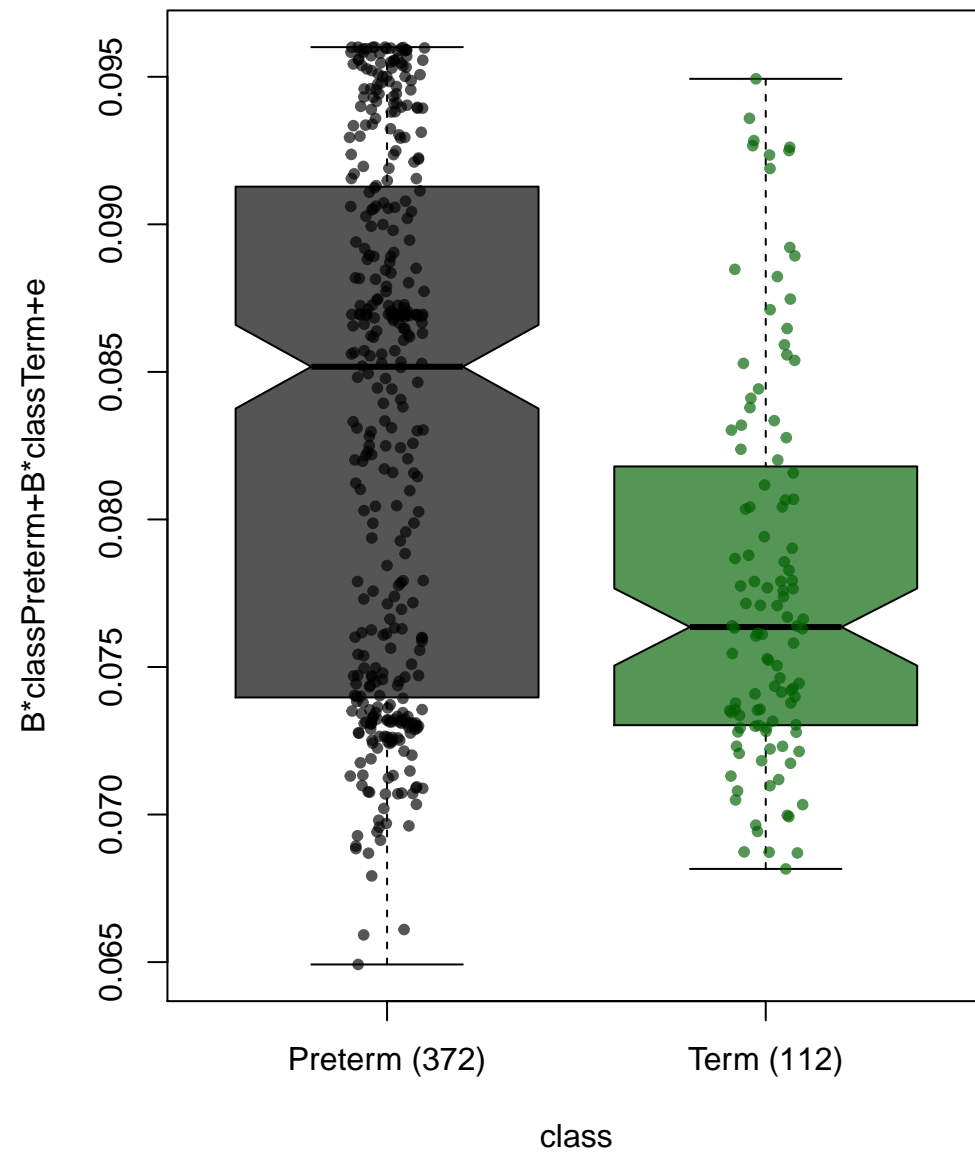

classTerm ( $-0.0214$  sd  $0.00366$ ,  $p=9.24e-09$ ,  $q=2.28e-08$ )

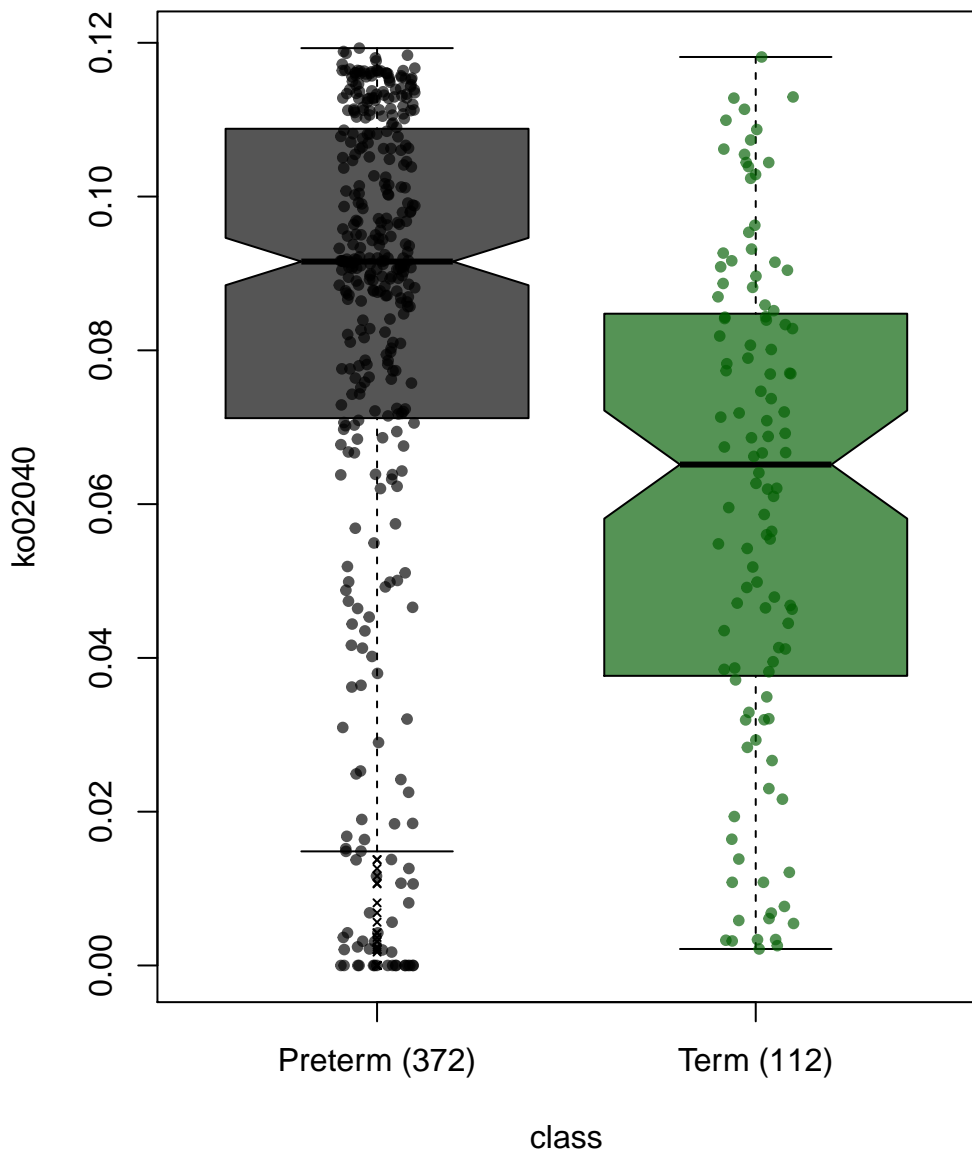

Partial Residual Plot

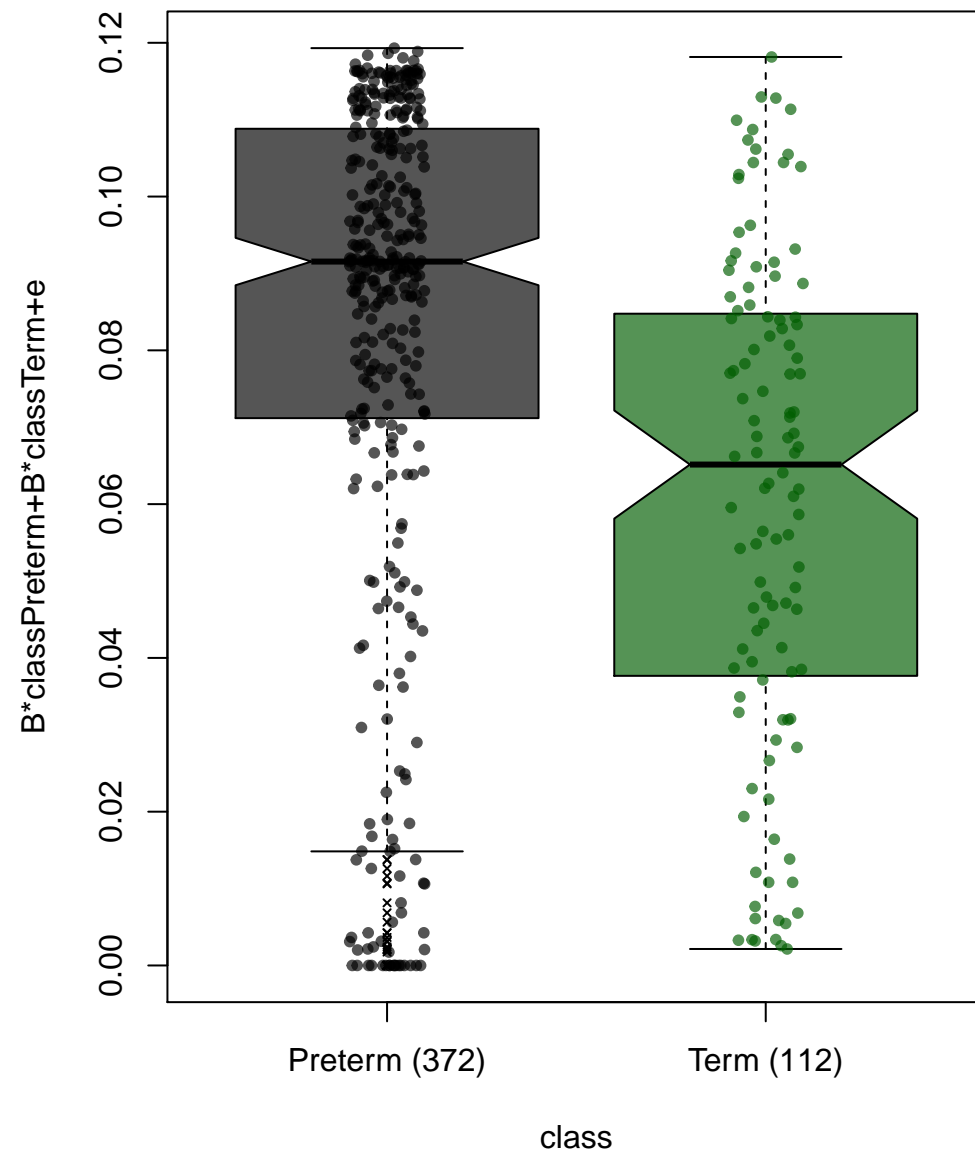

classTerm (-0.00611 sd 0.00107, p=1.86e-08, q=4.55e-08)

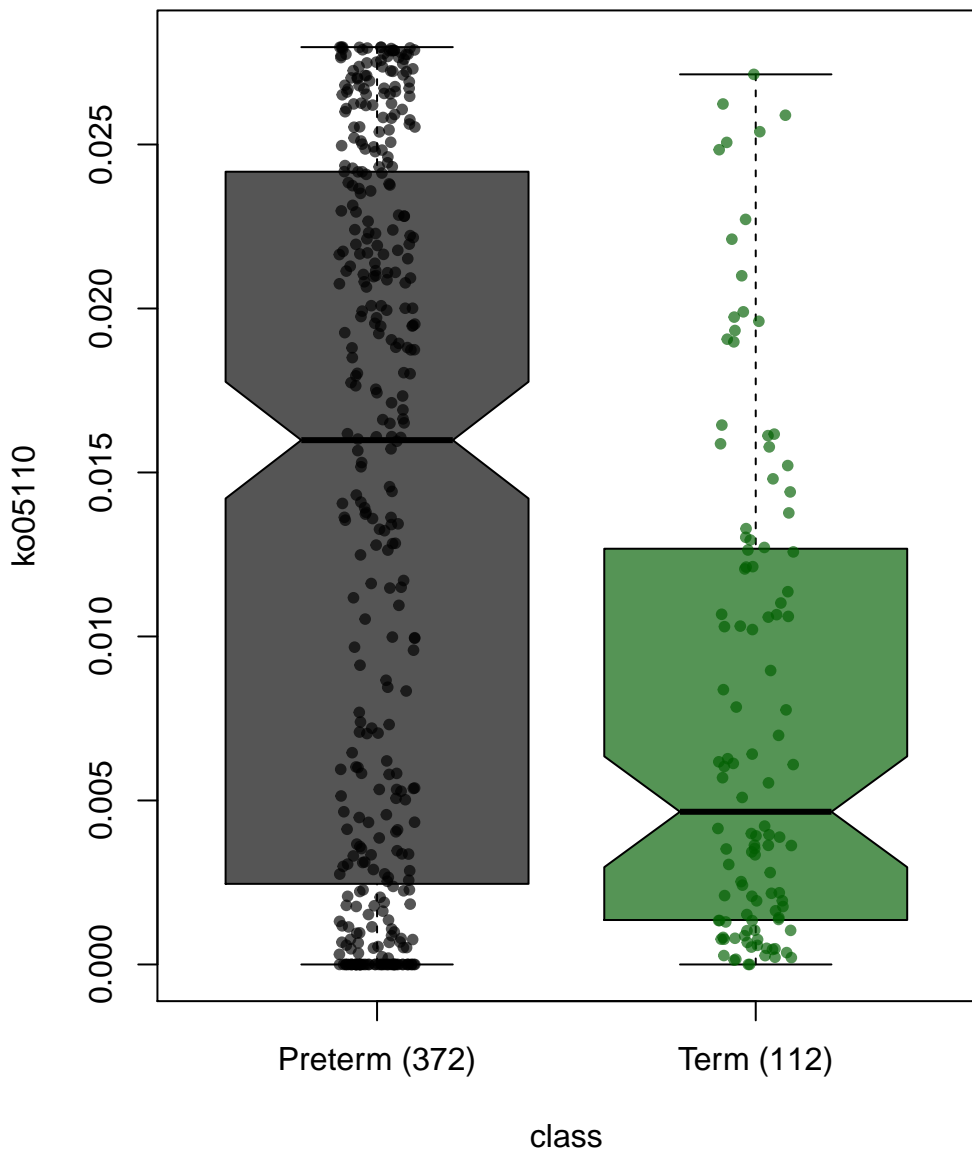

Partial Residual Plot

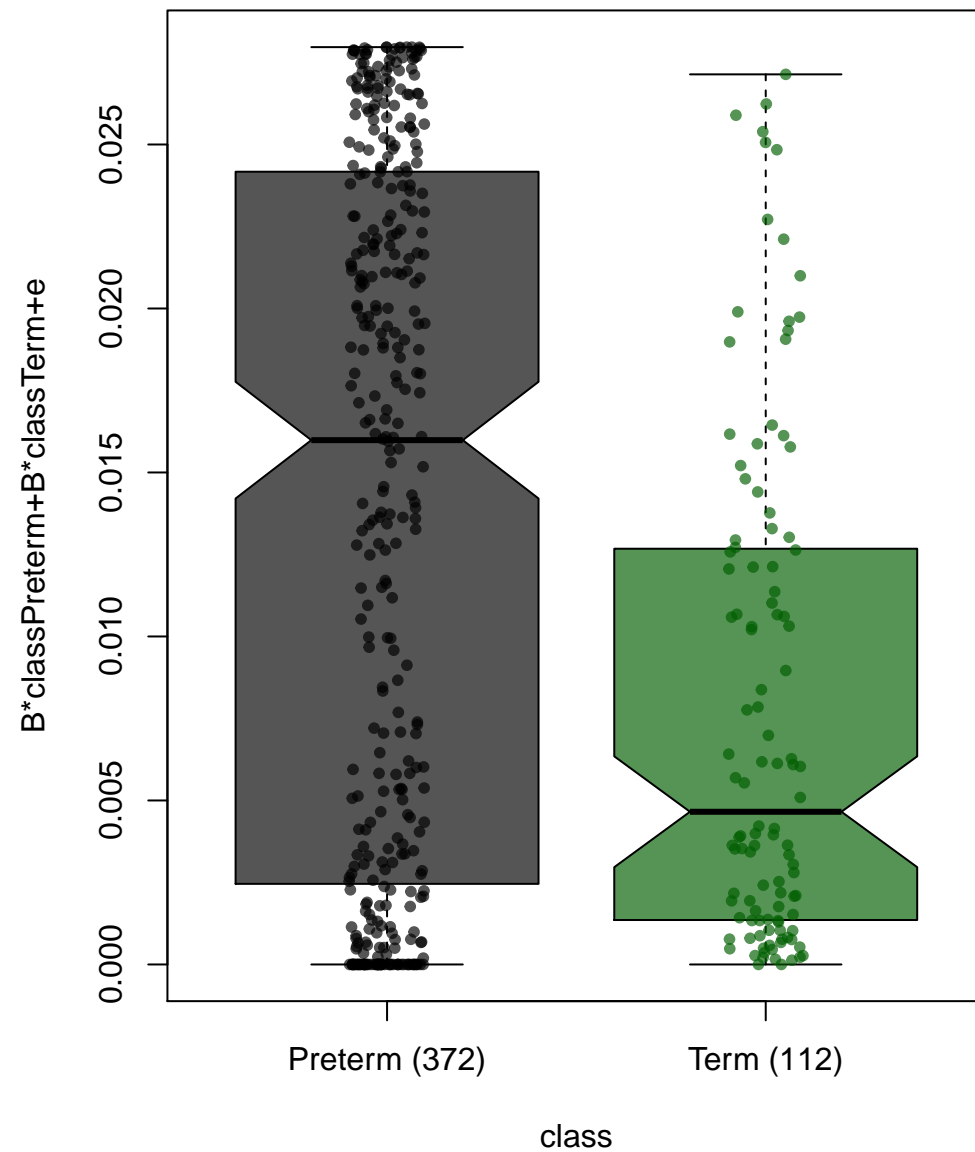

classTerm ( $-0.00585$  sd  $0.00103$ ,  $p=2e-08$ ,  $q=4.86e-08$ )

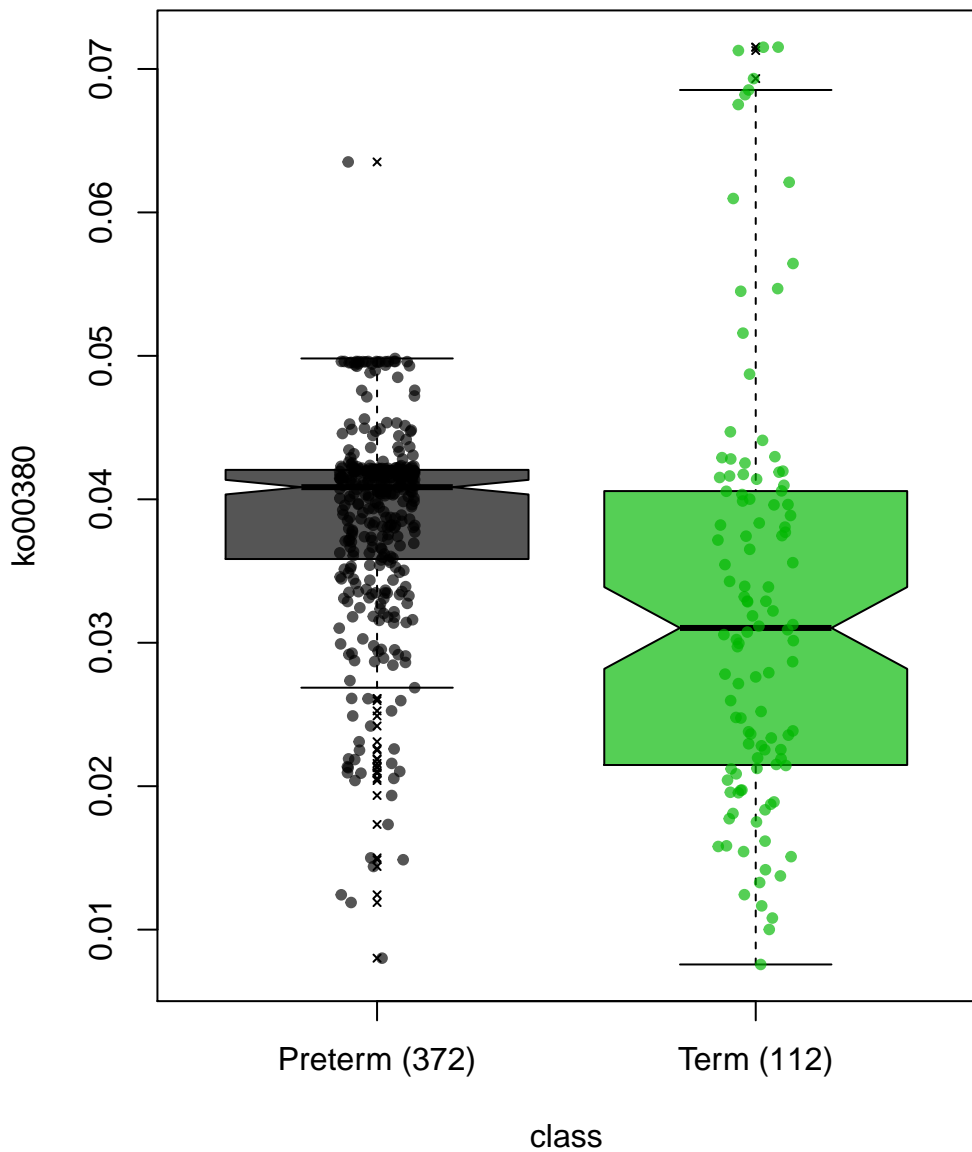

Partial Residual Plot

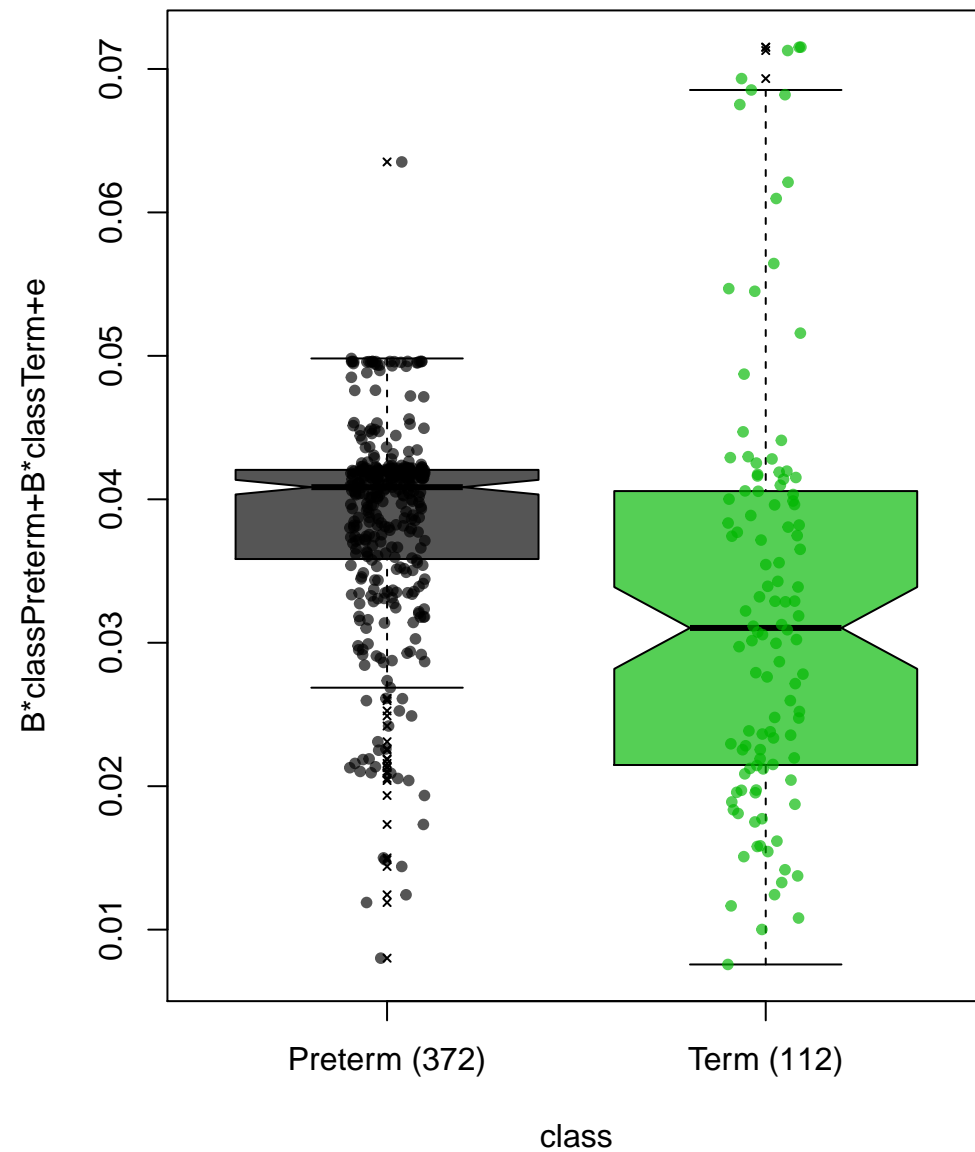



classTerm (0.00339 sd 0.000597, p=2.25e-08, q=5.42e-08)

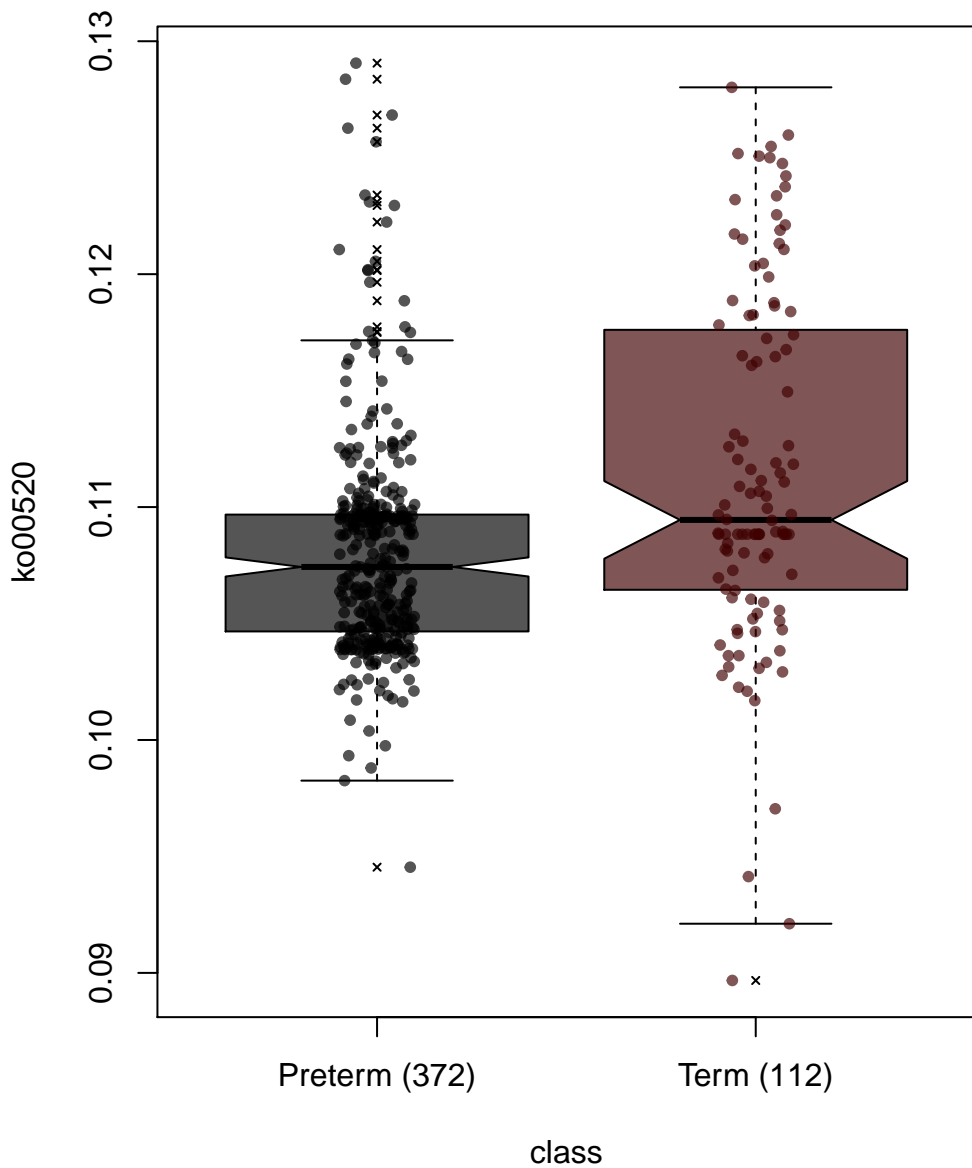

Partial Residual Plot

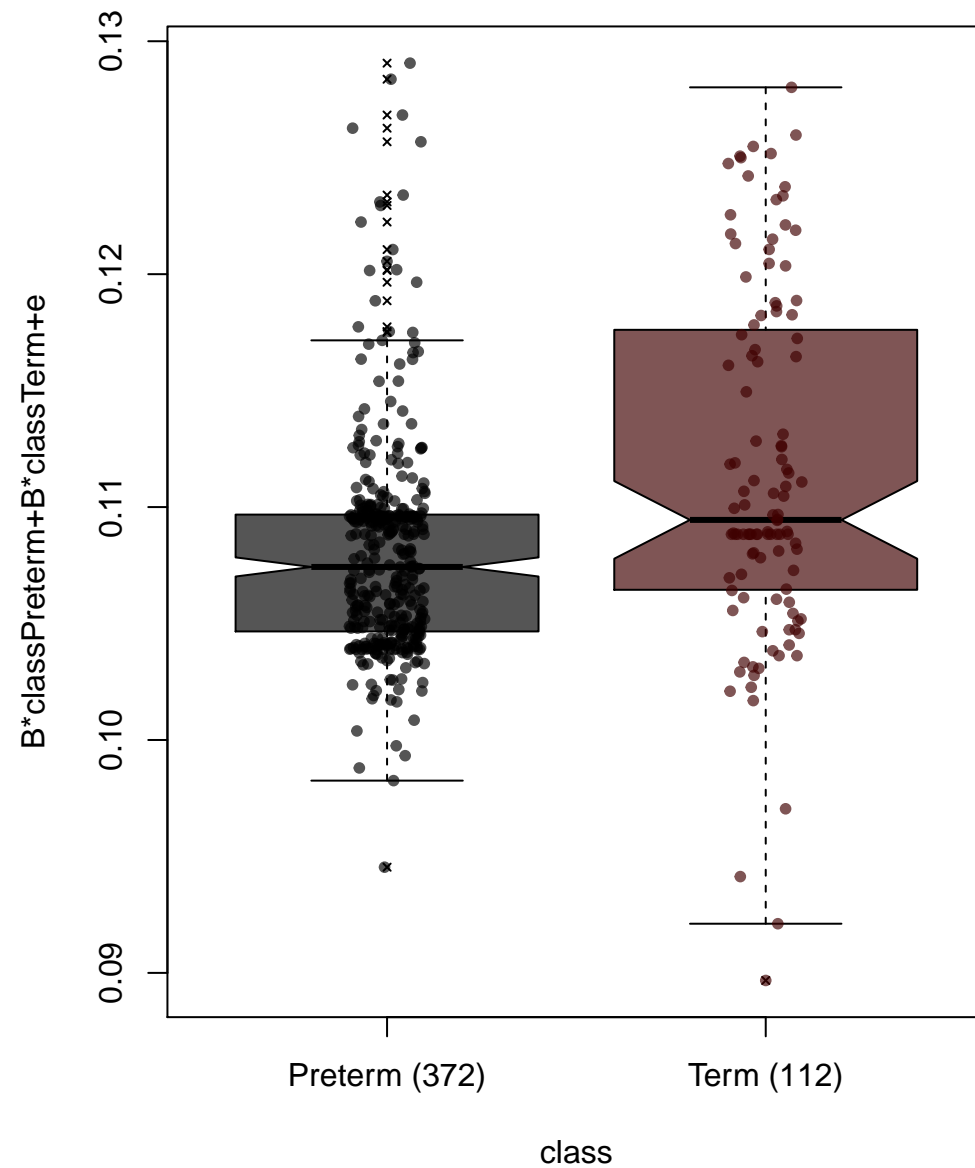

classTerm (0.00296 sd 0.000525, p=2.83e-08, q=6.73e-08)

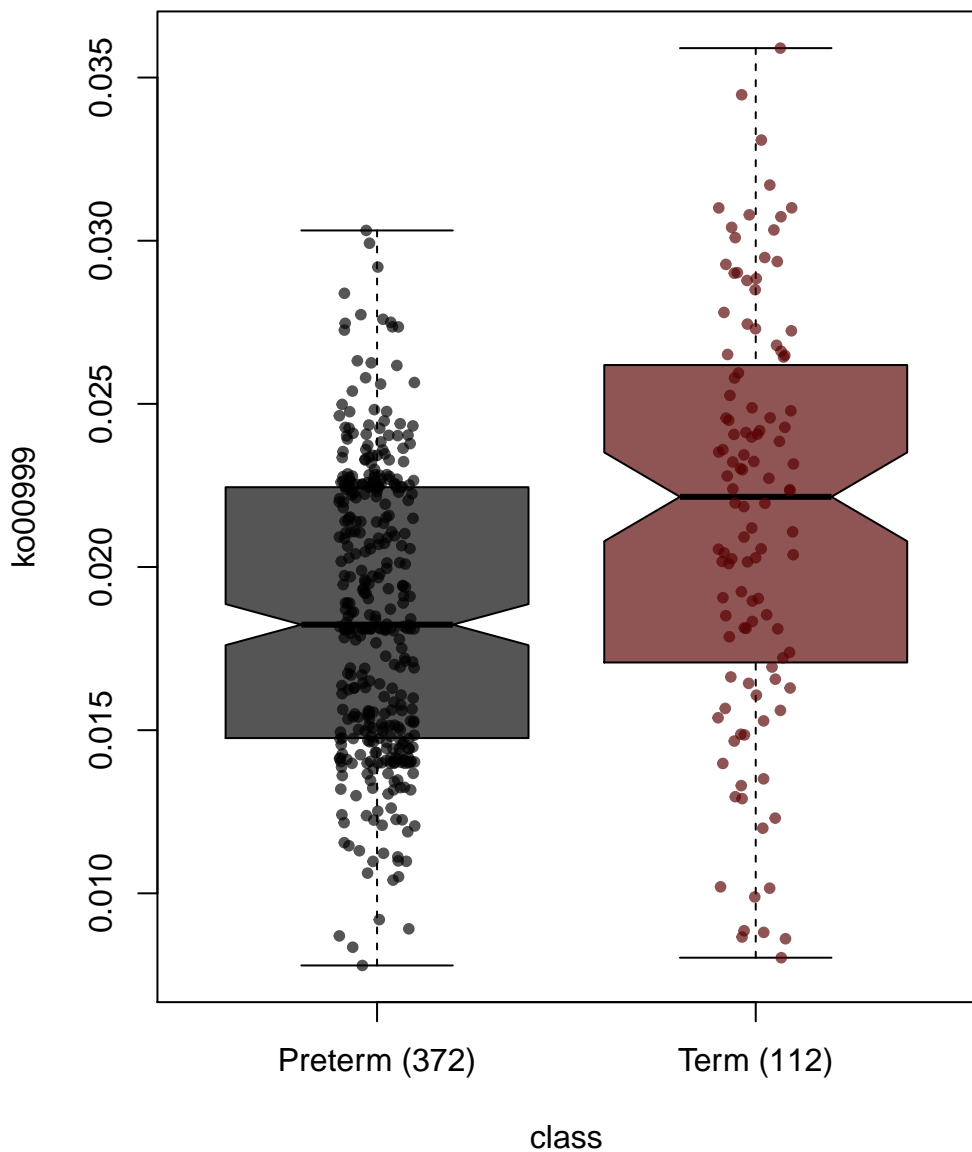

Partial Residual Plot

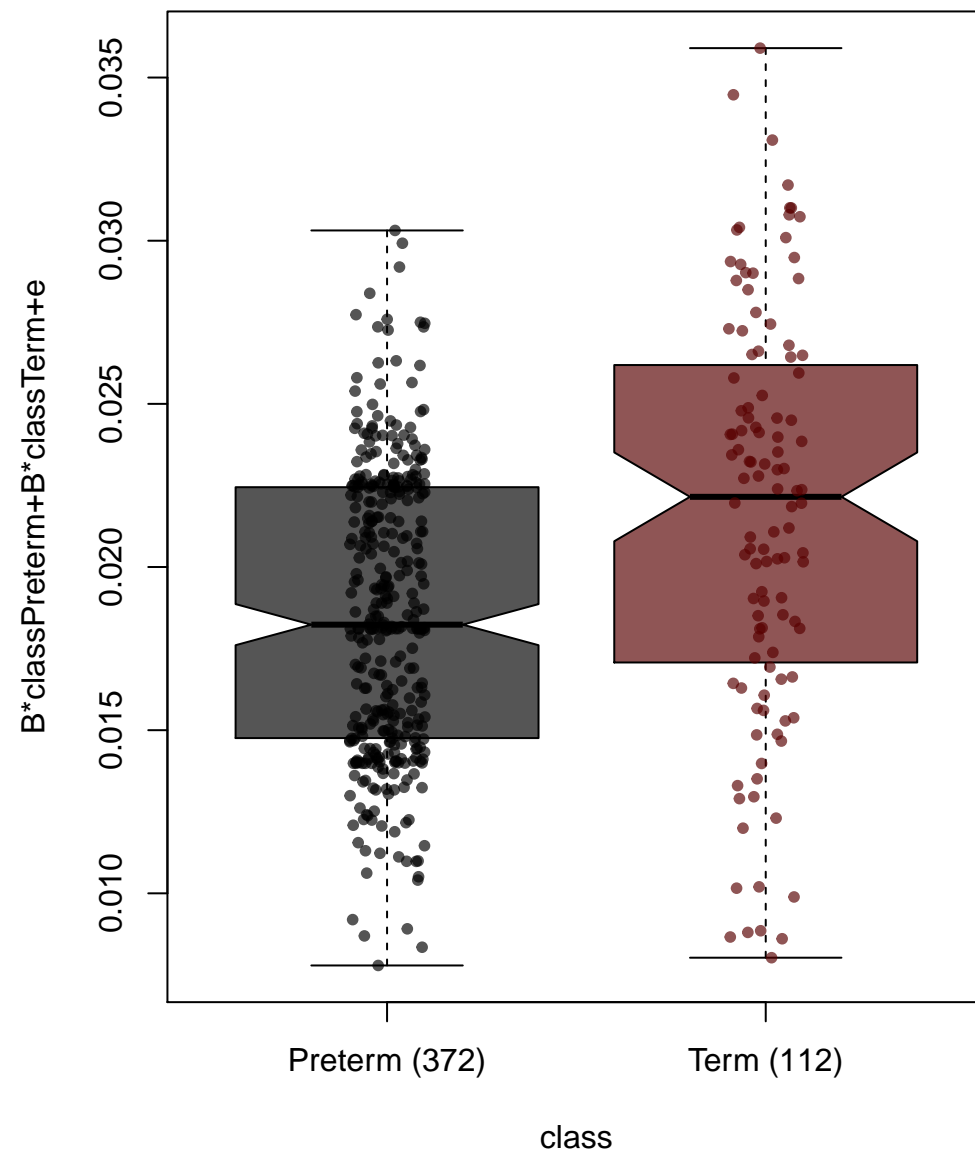

classTerm (-0.00728 sd 0.00129, p=2.84e-08, q=6.73e-08)

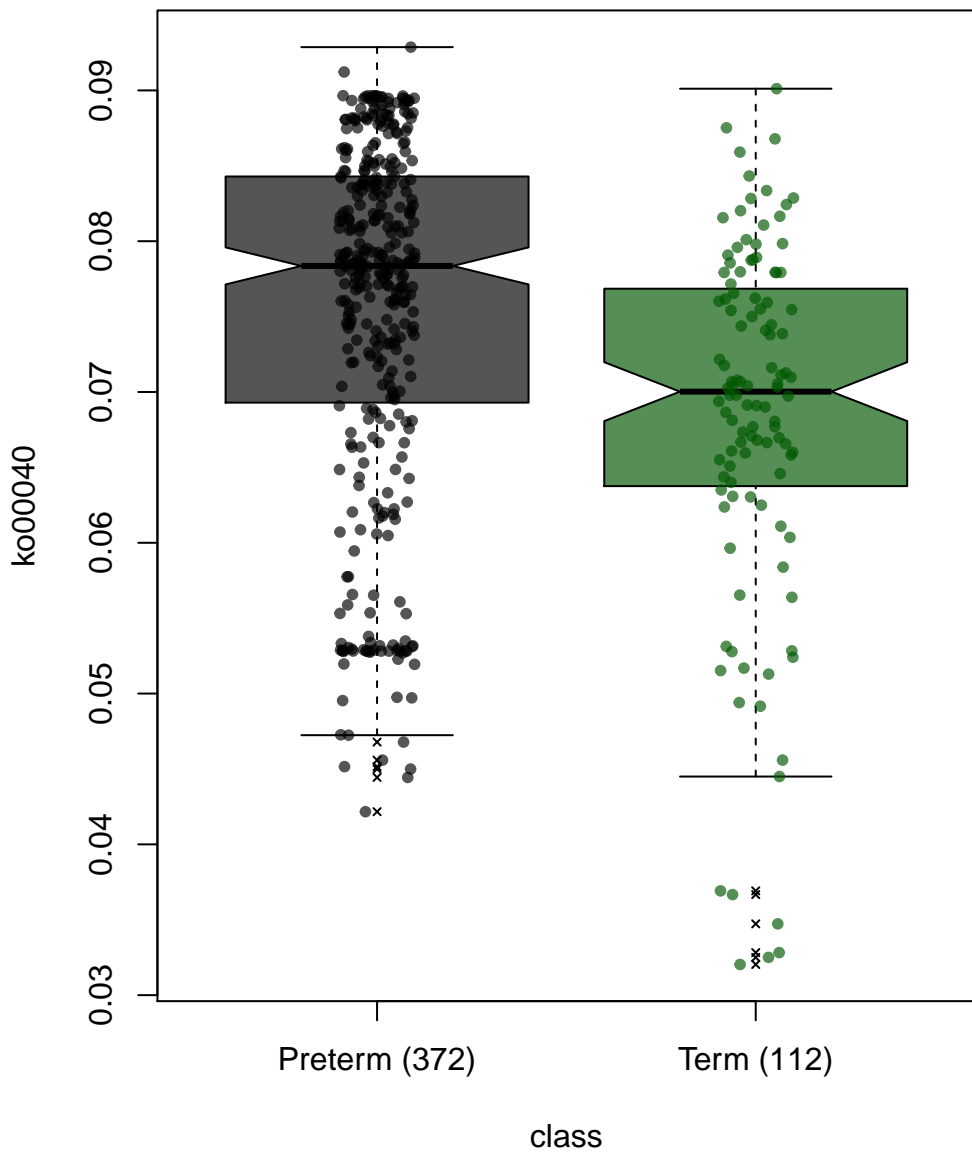

Partial Residual Plot

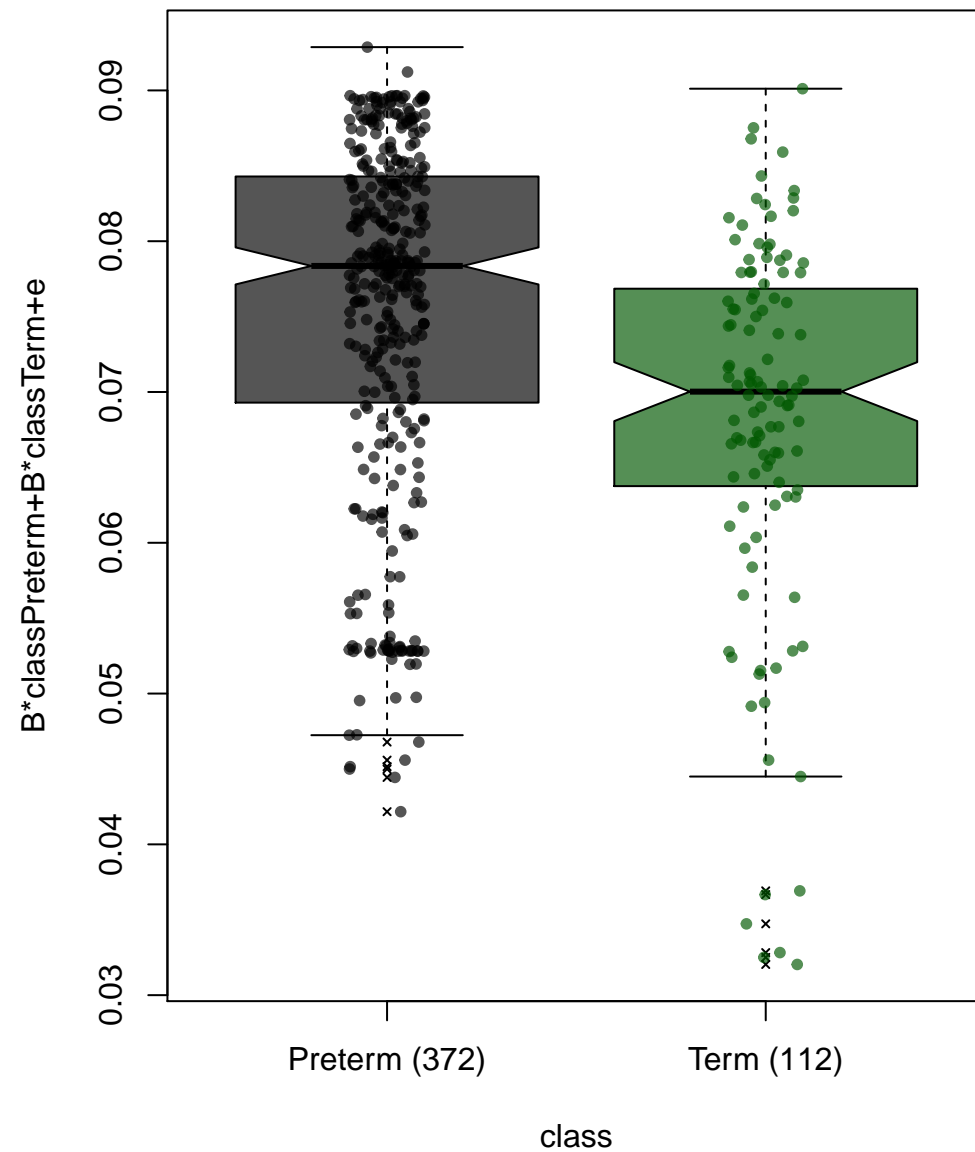

classTerm (0.00455 sd 0.000812, p=3.45e-08, q=8.08e-08)

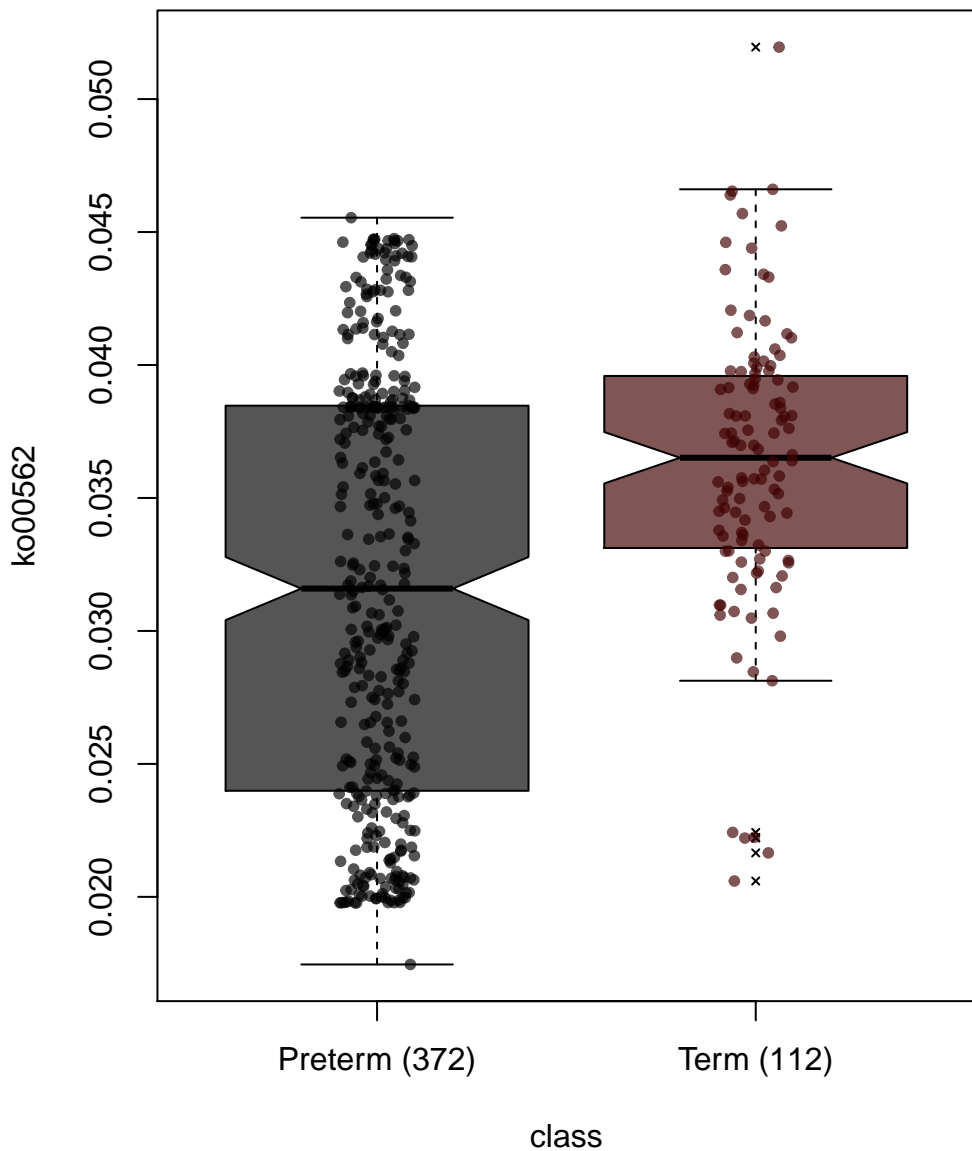

Partial Residual Plot

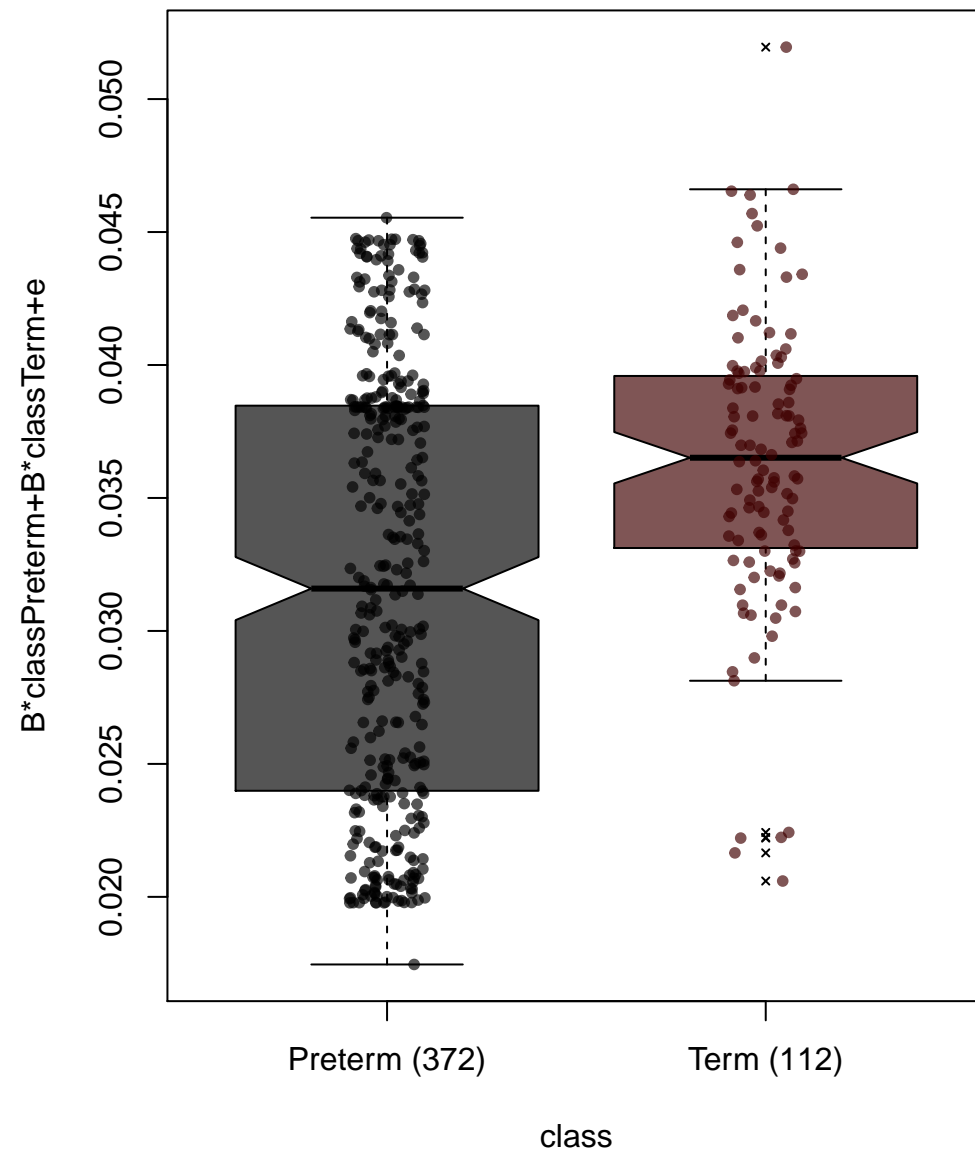

classTerm (0.0015 sd 0.000275, p=7.47e-08, q=1.74e-07)

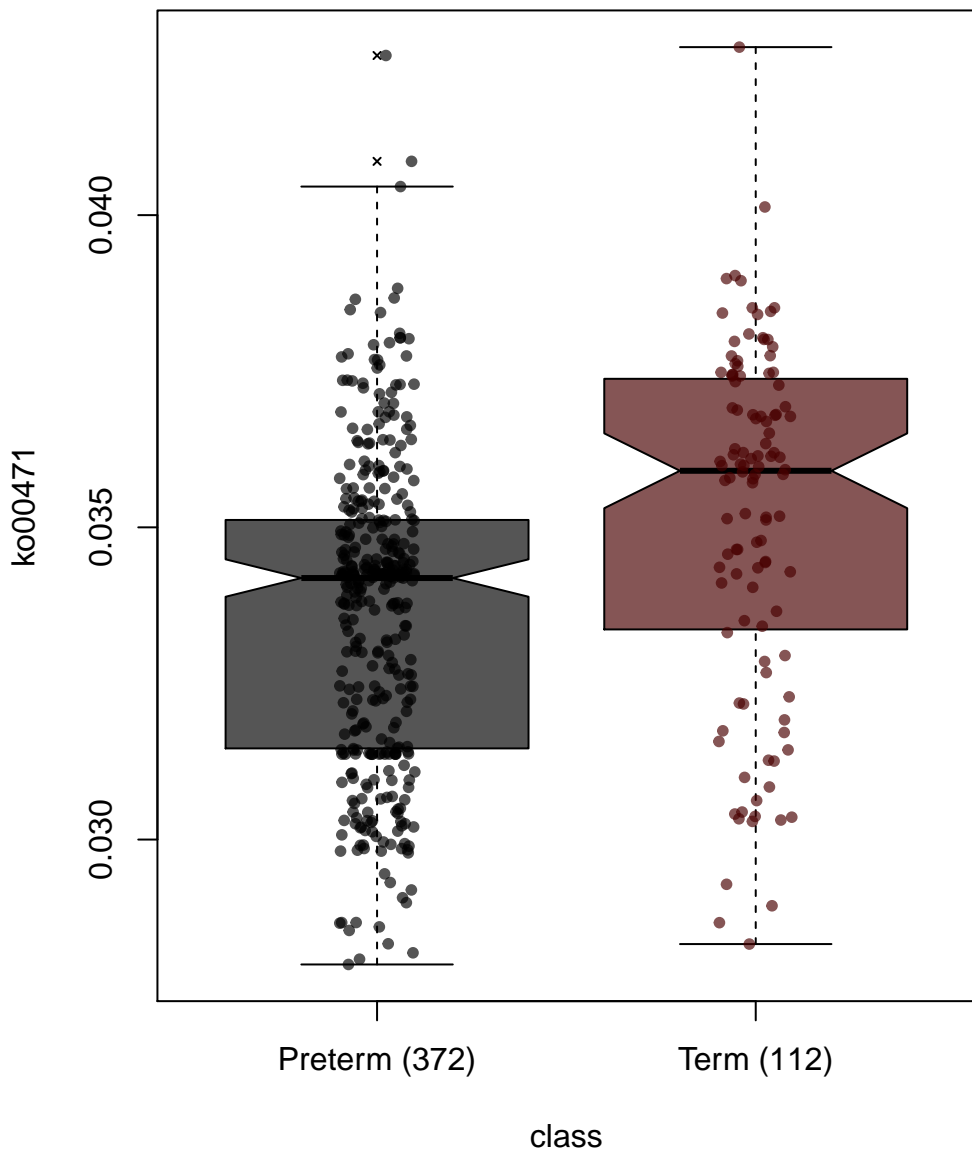

Partial Residual Plot

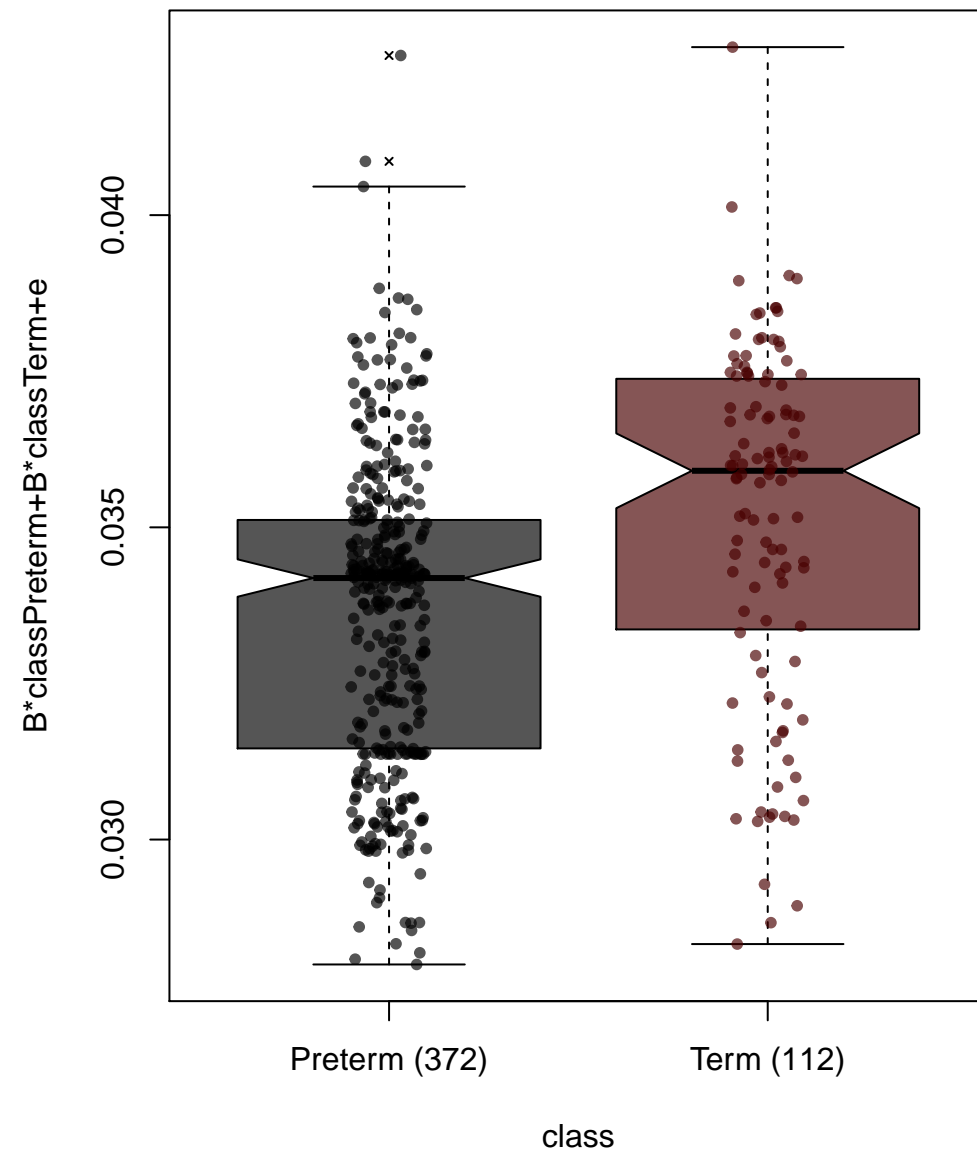

classTerm (-0.0037 sd 0.000683, p=9.57e-08, q=2.21e-07)

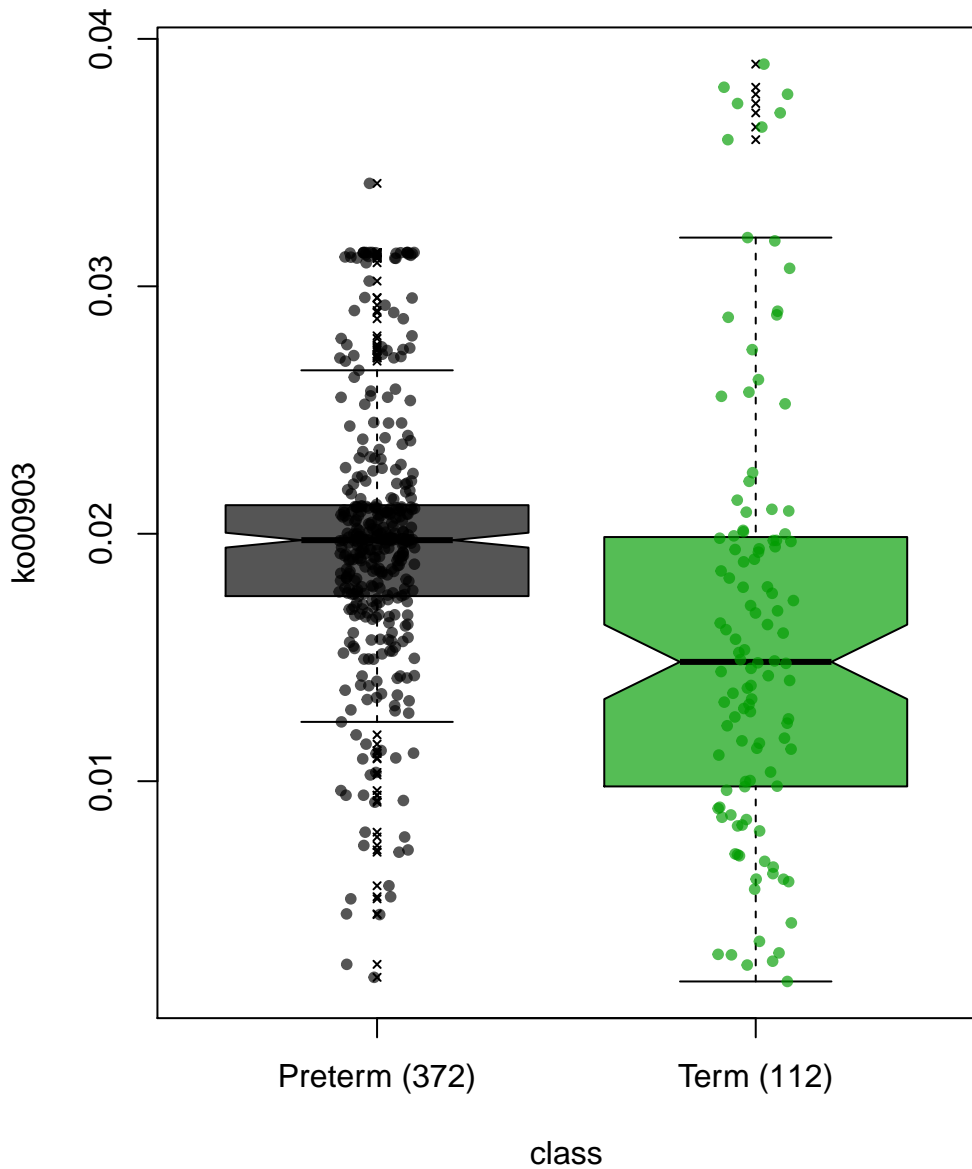

Partial Residual Plot

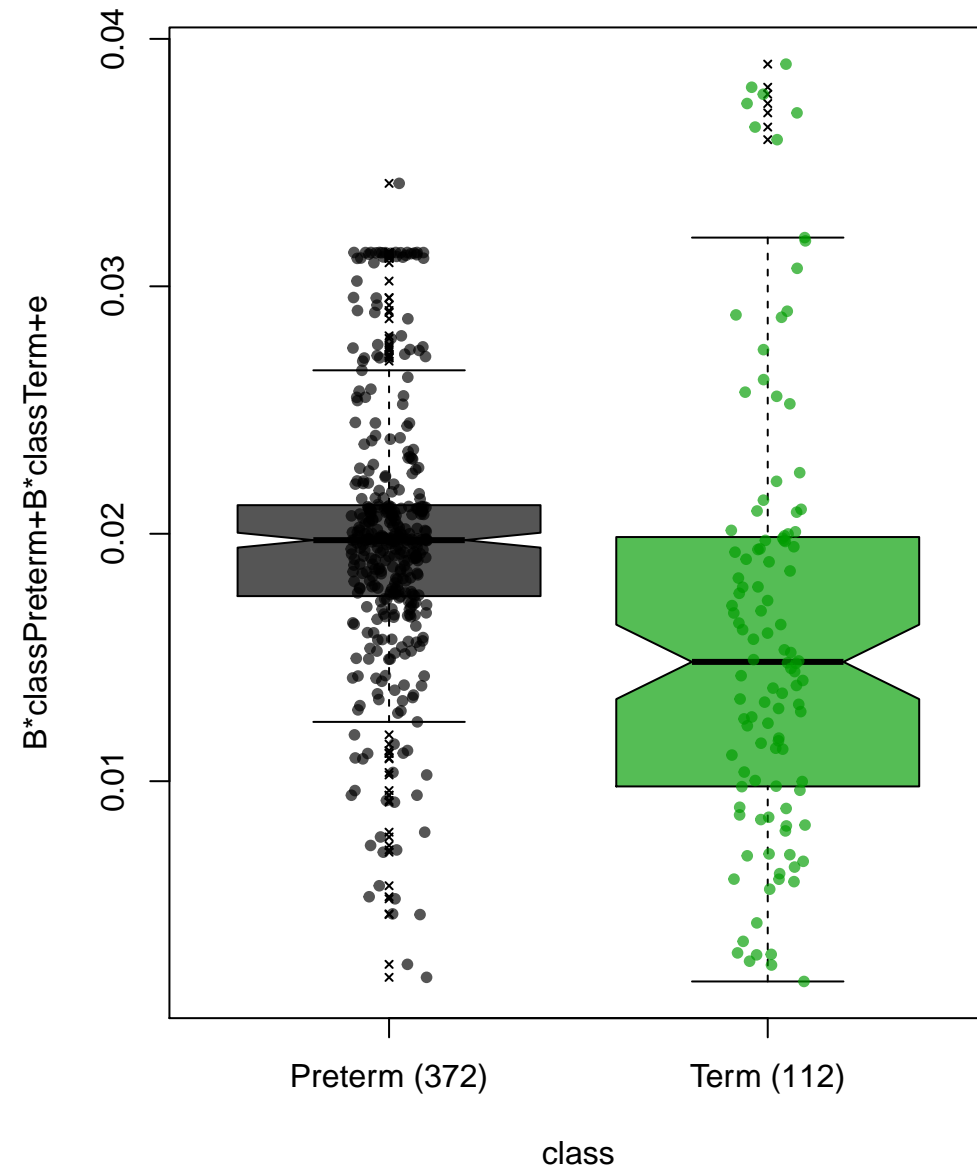

classTerm (0.00126 sd 0.000234, p=9.86e-08, q=2.25e-07)

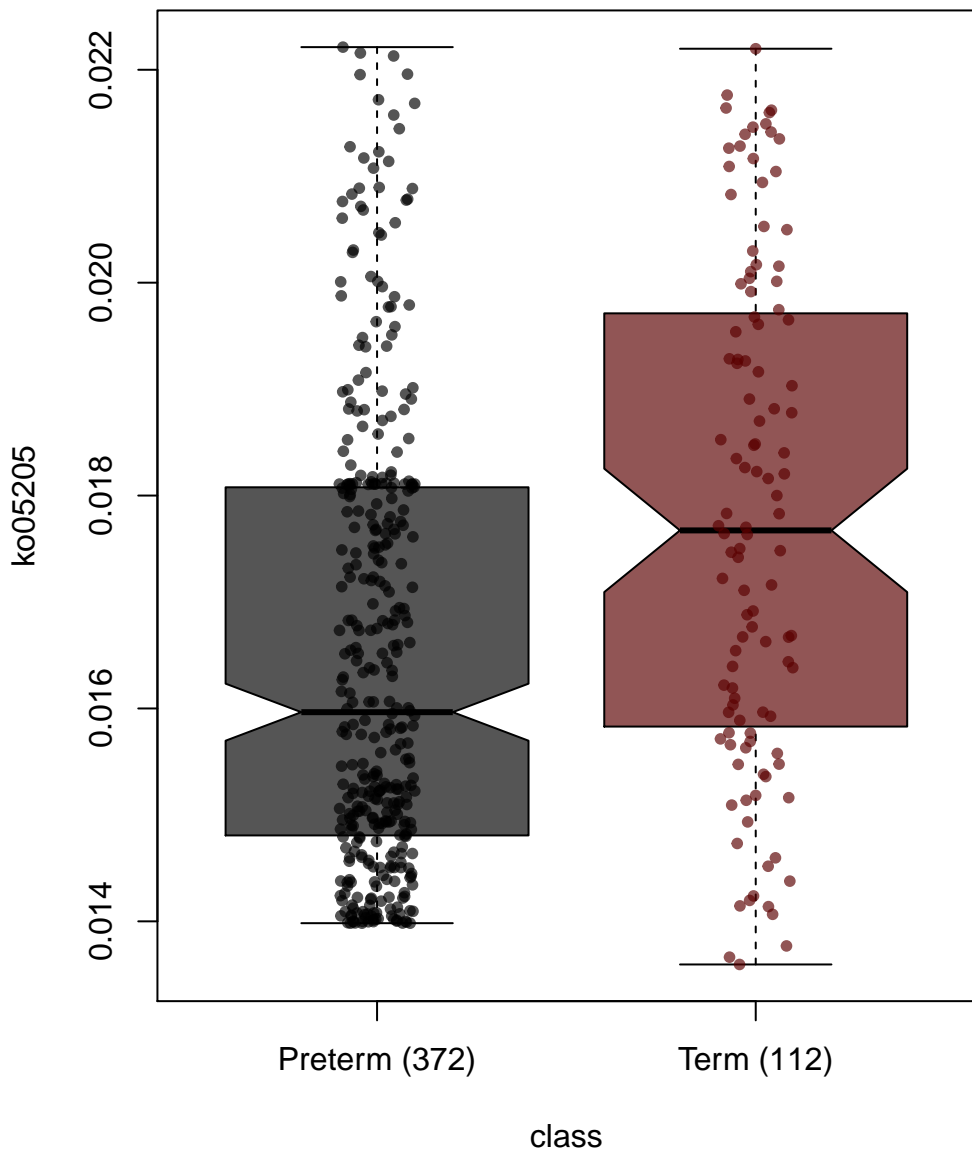

Partial Residual Plot

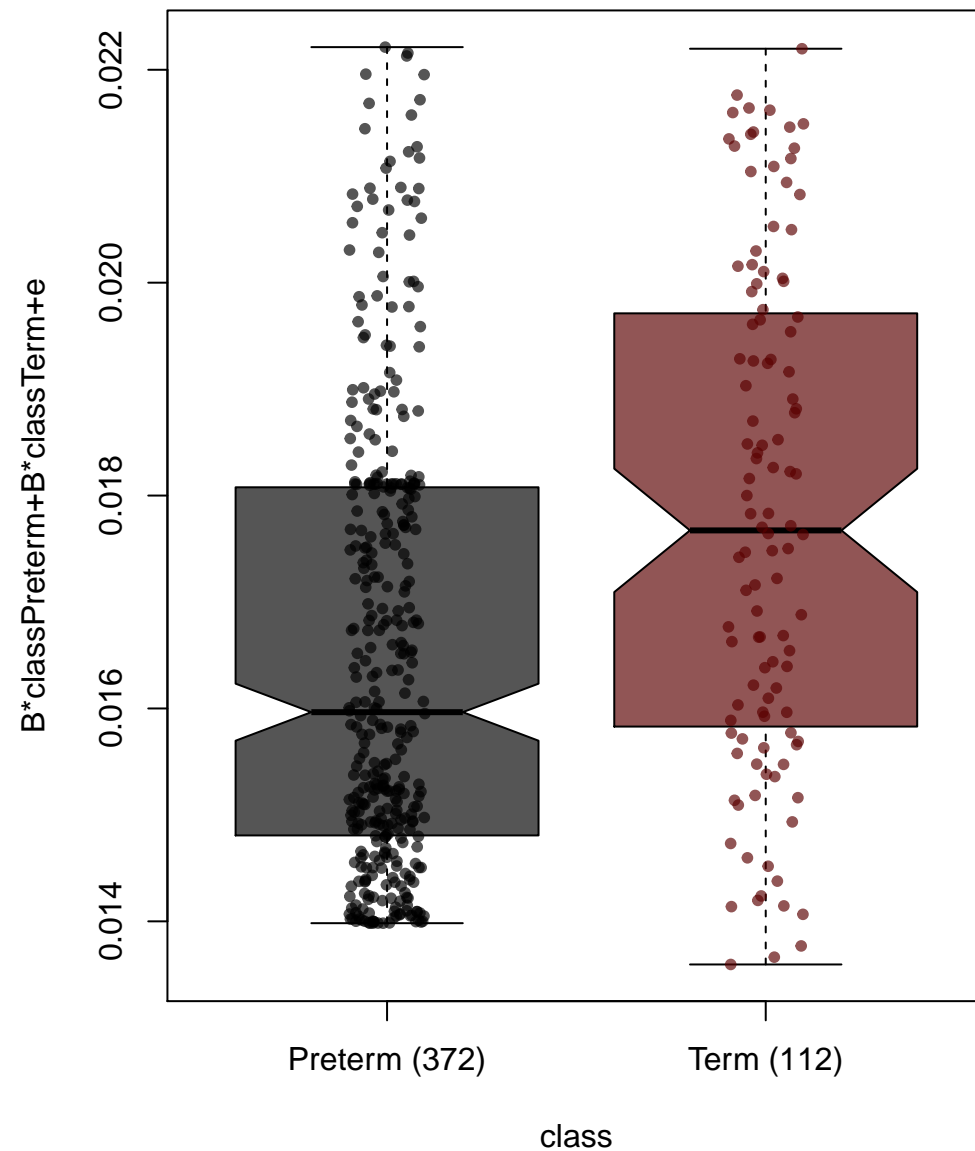

classTerm (-0.00113 sd 0.00021, p=1.19e-07, q=2.69e-07)

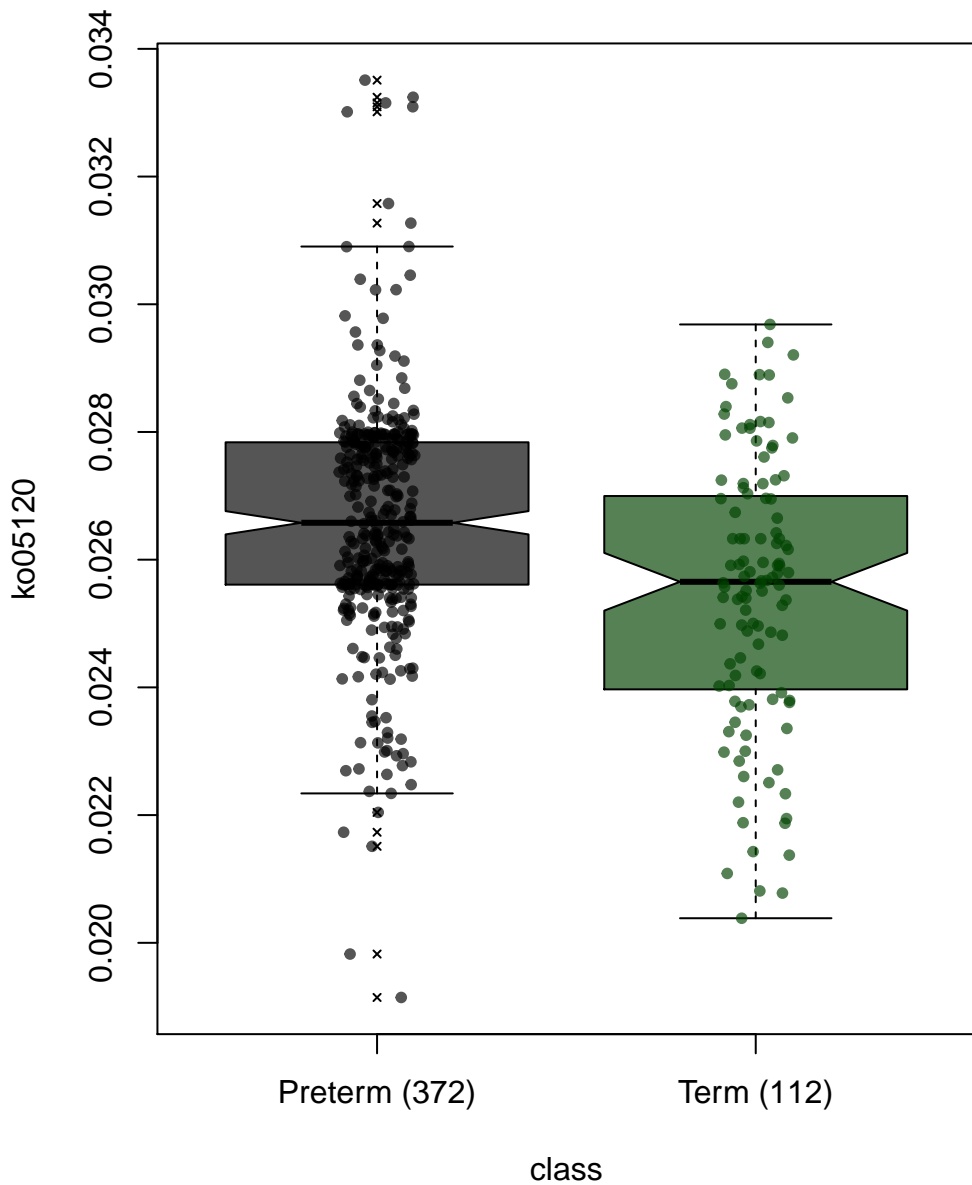

Partial Residual Plot

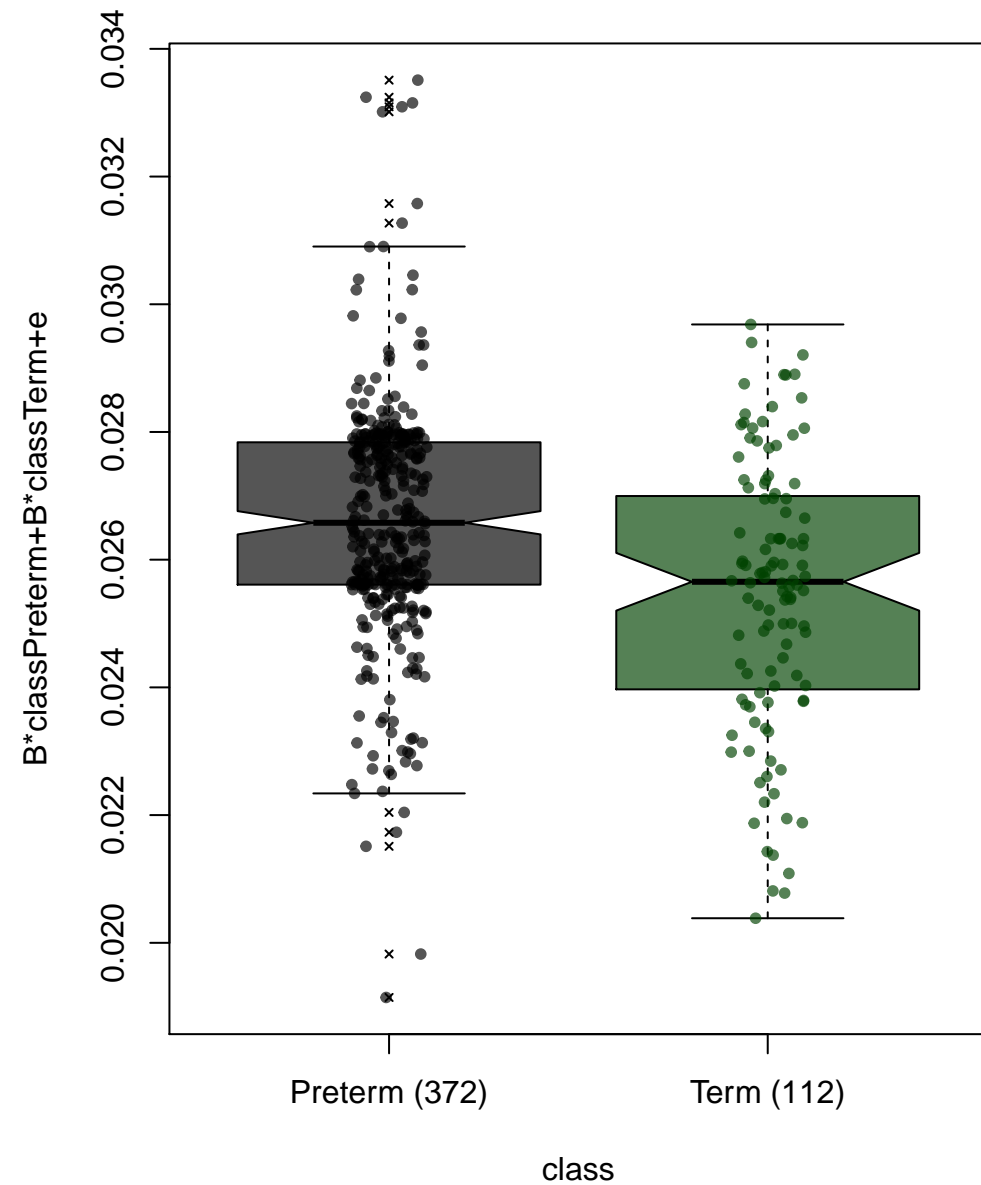



classTerm (-0.0022 sd 0.000412, p=1.37e-07, q=3.08e-07)

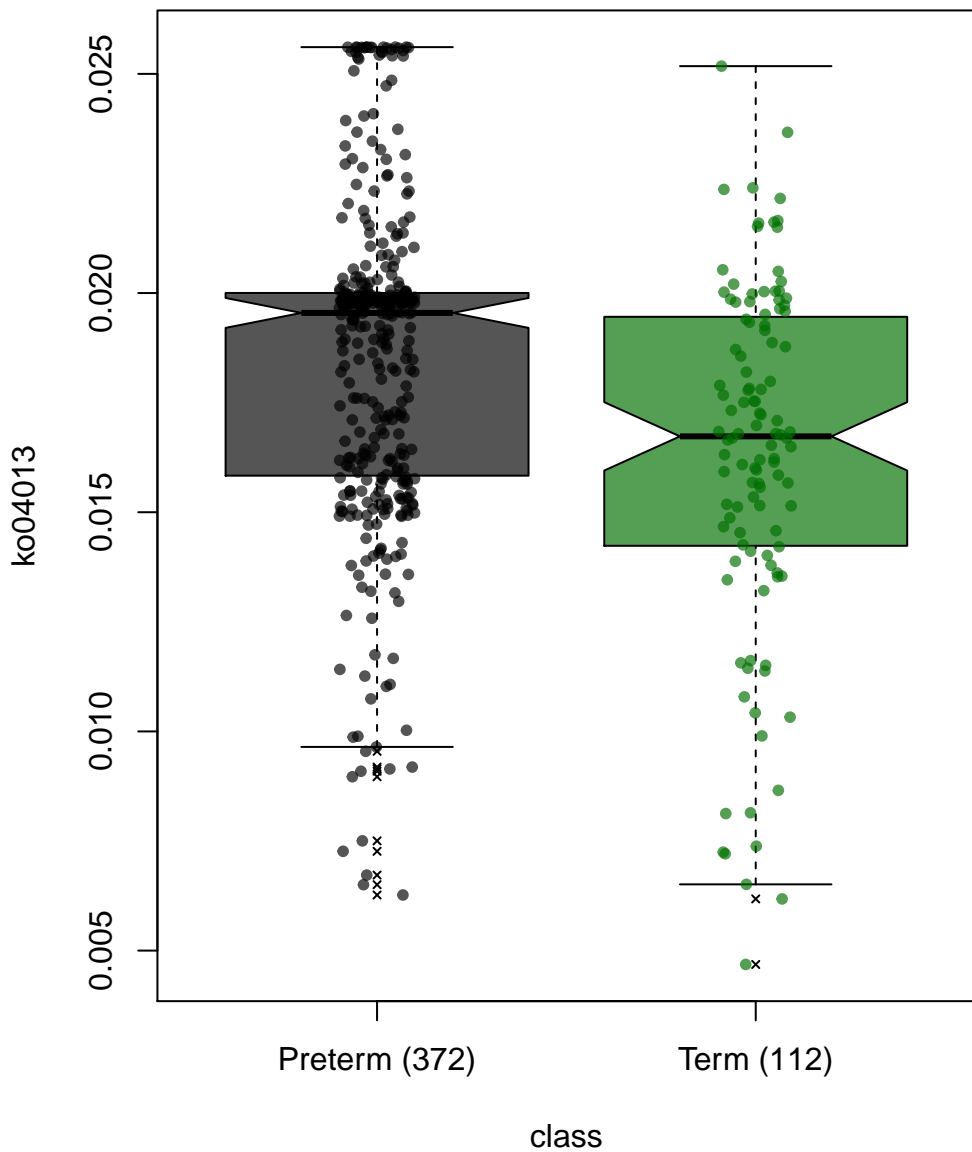

Partial Residual Plot

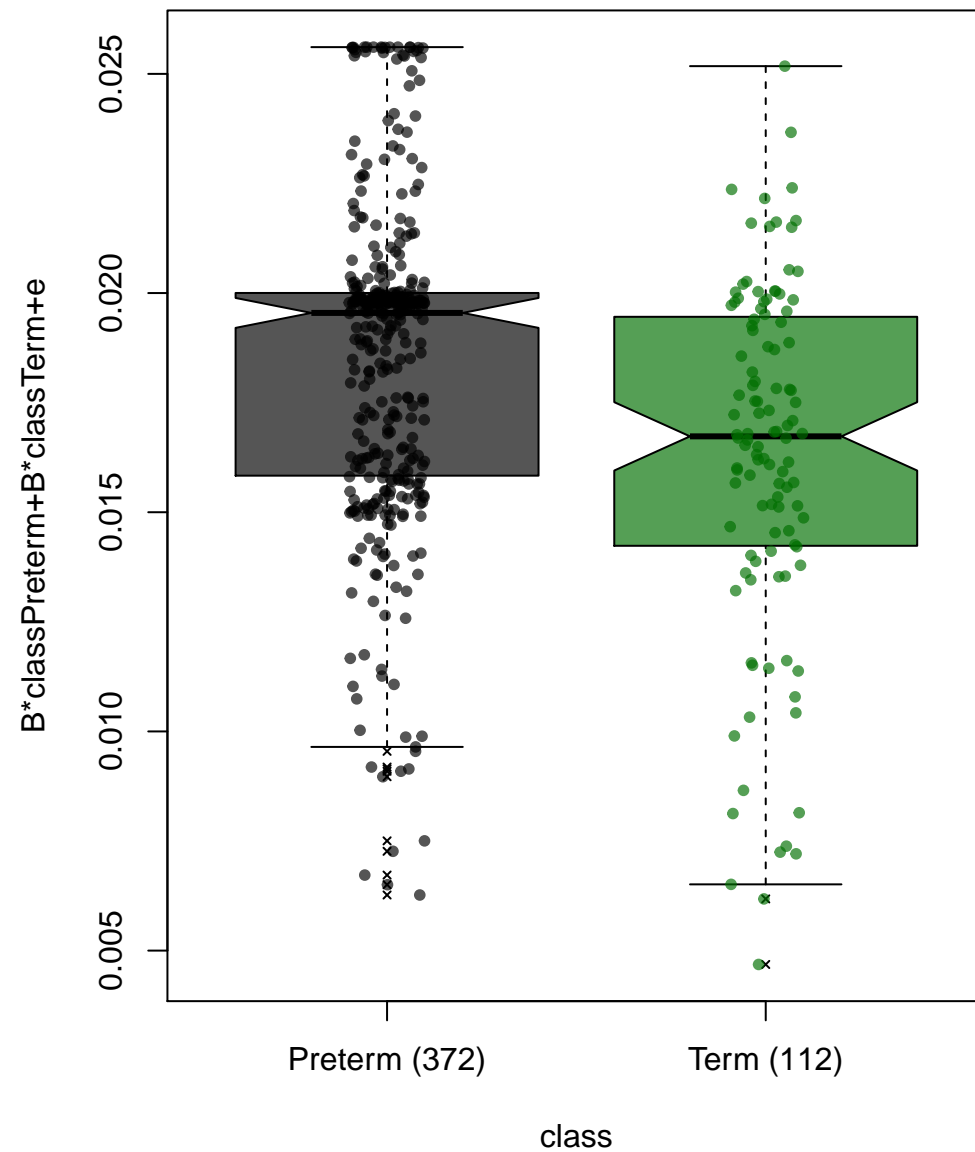

classTerm (0.00127 sd 0.000238, p=1.6e-07, q=3.58e-07)

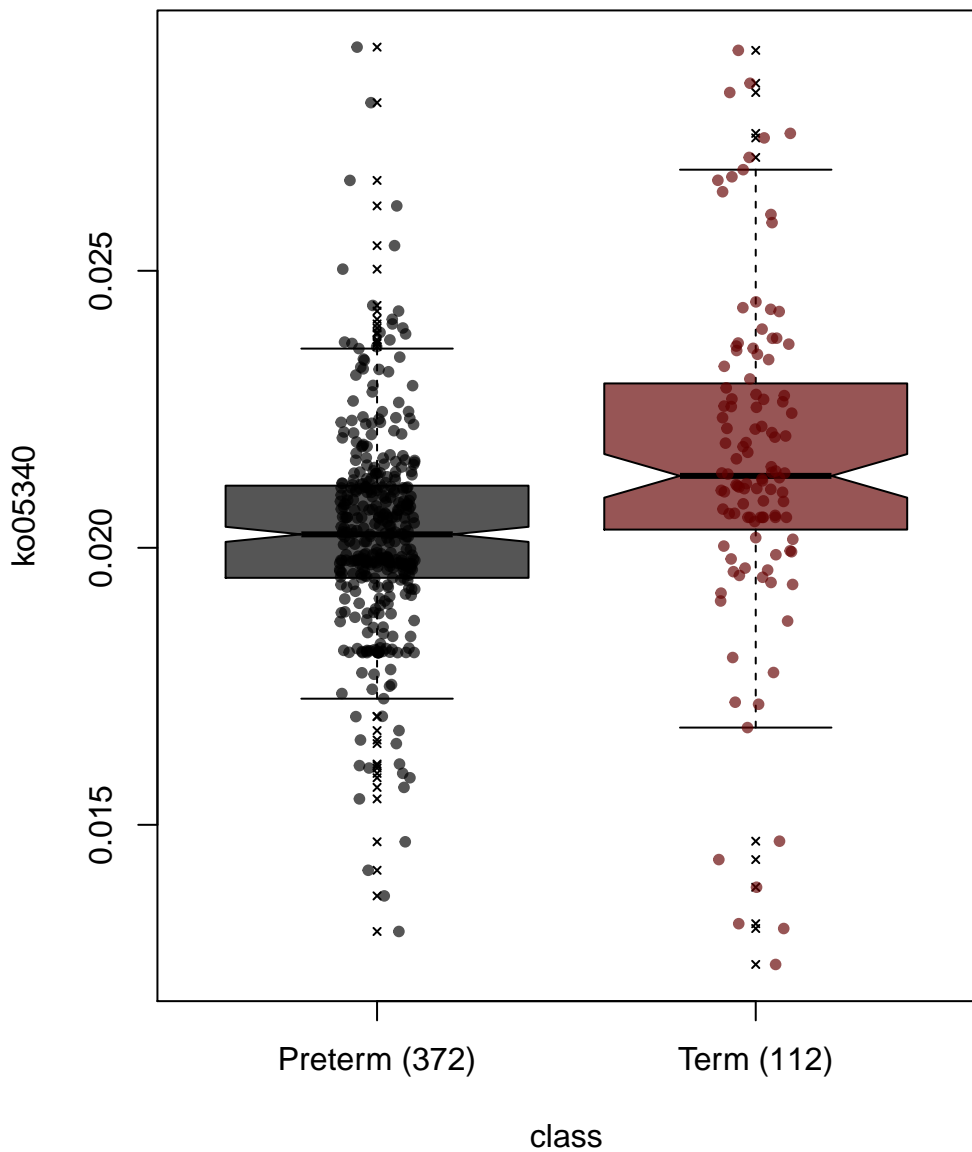

Partial Residual Plot

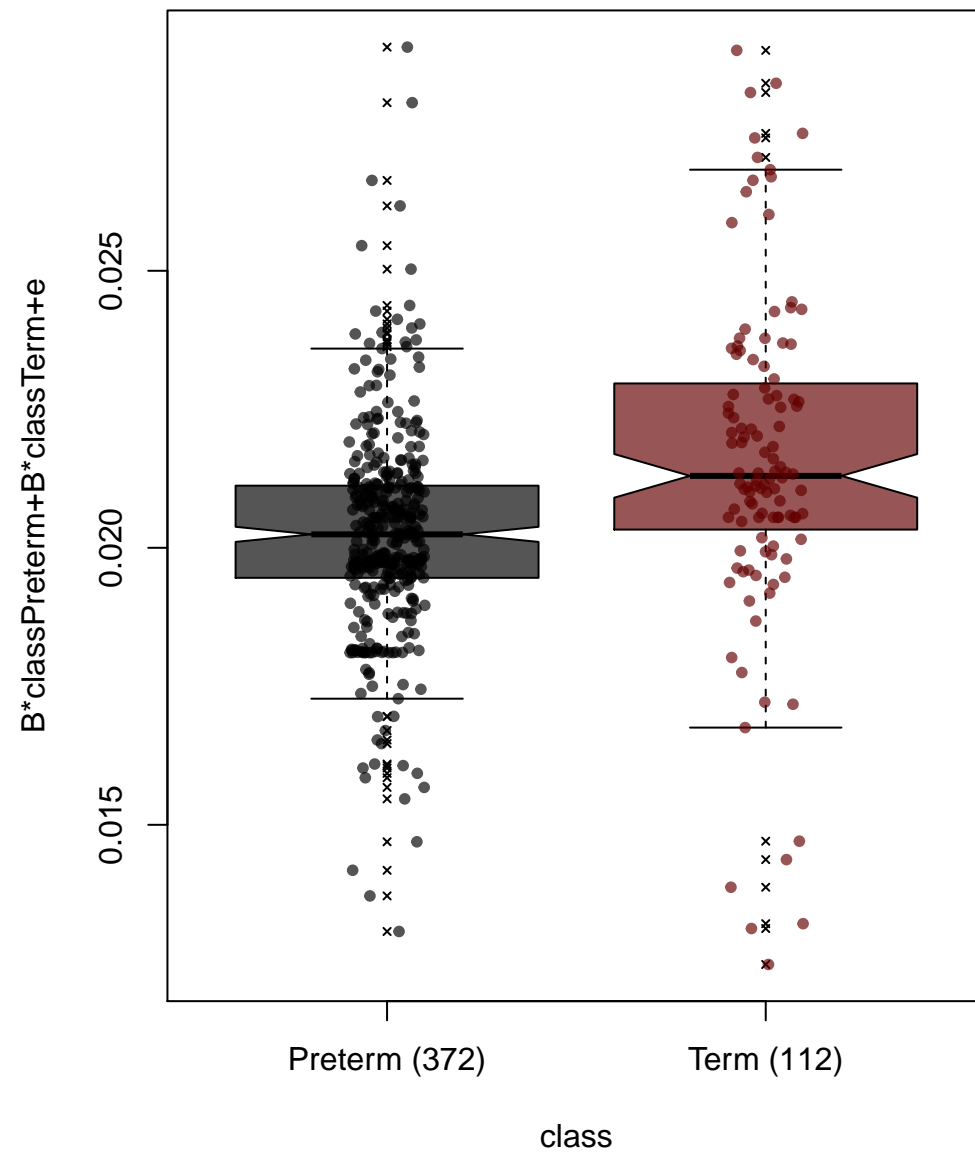

classTerm (−0.00449 sd 0.000847, p=1.75e−07, q=3.84e−07)

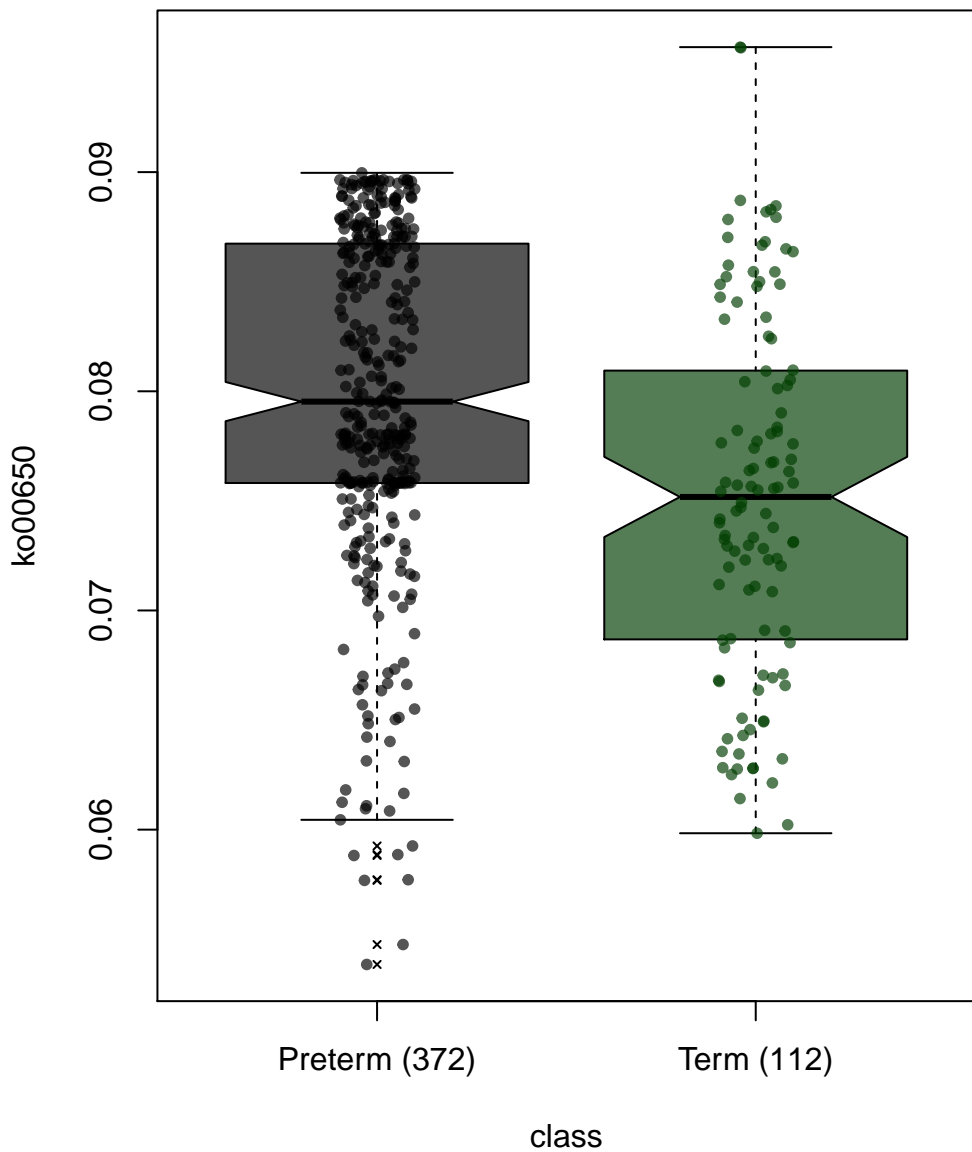

Partial Residual Plot

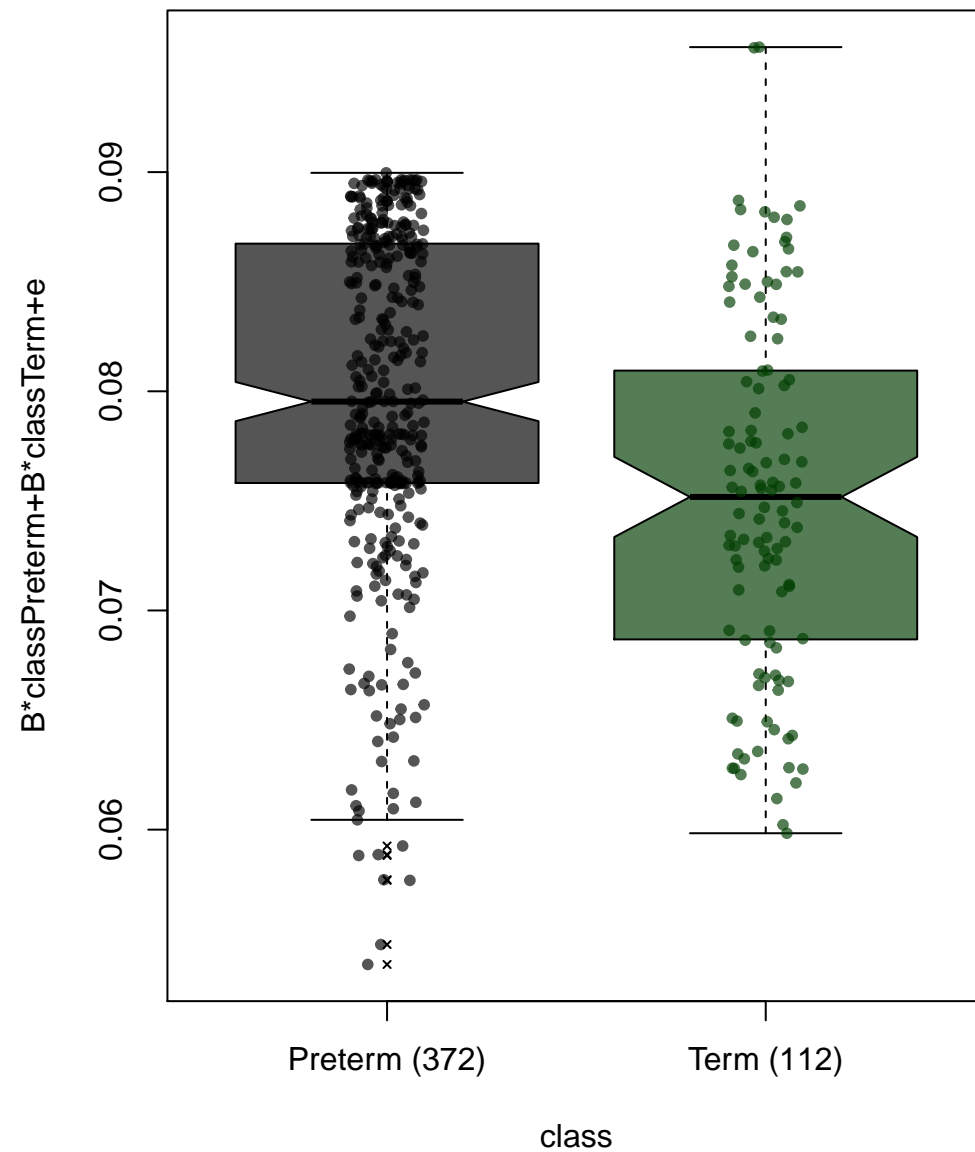

classTerm (0.00183 sd 0.000345, p=1.75e-07, q=3.84e-07)

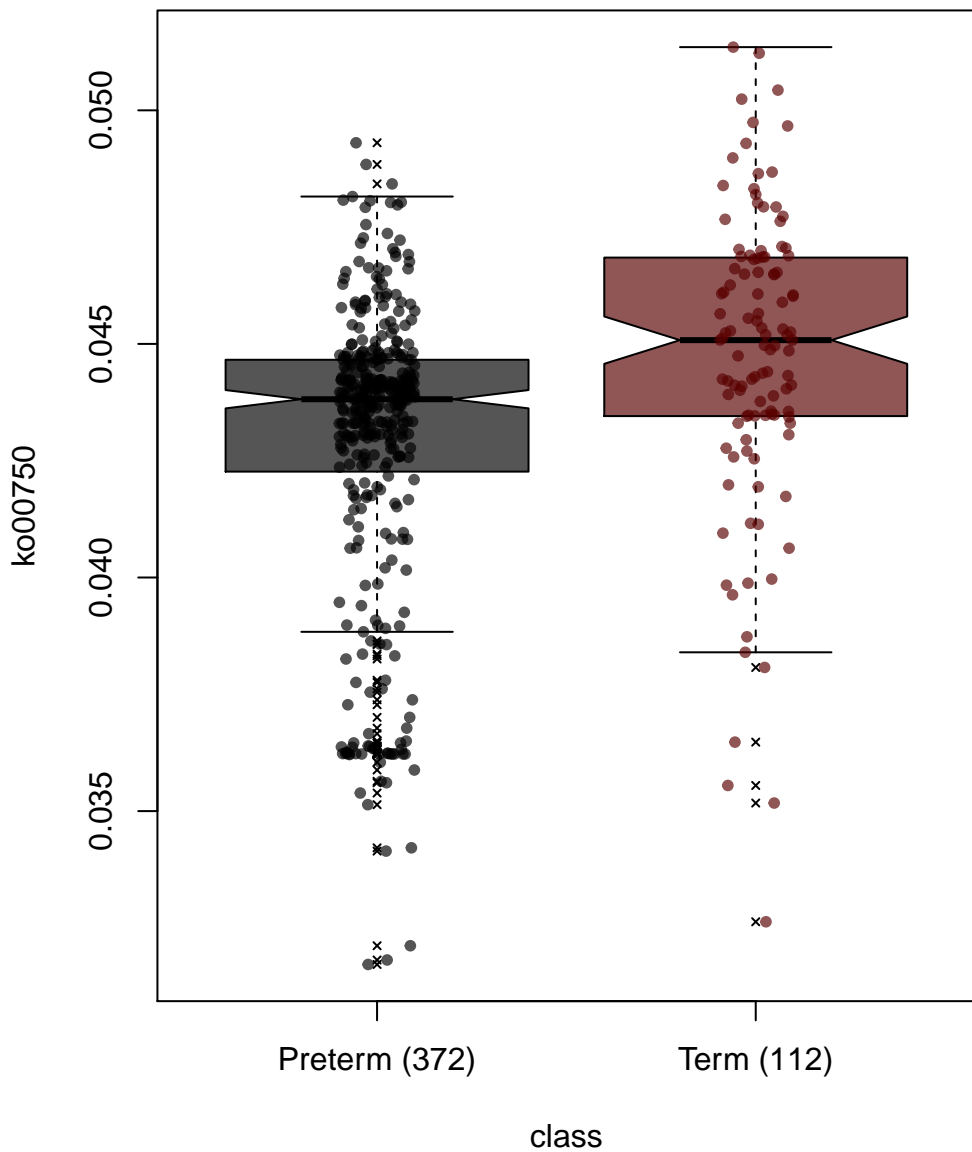

Partial Residual Plot

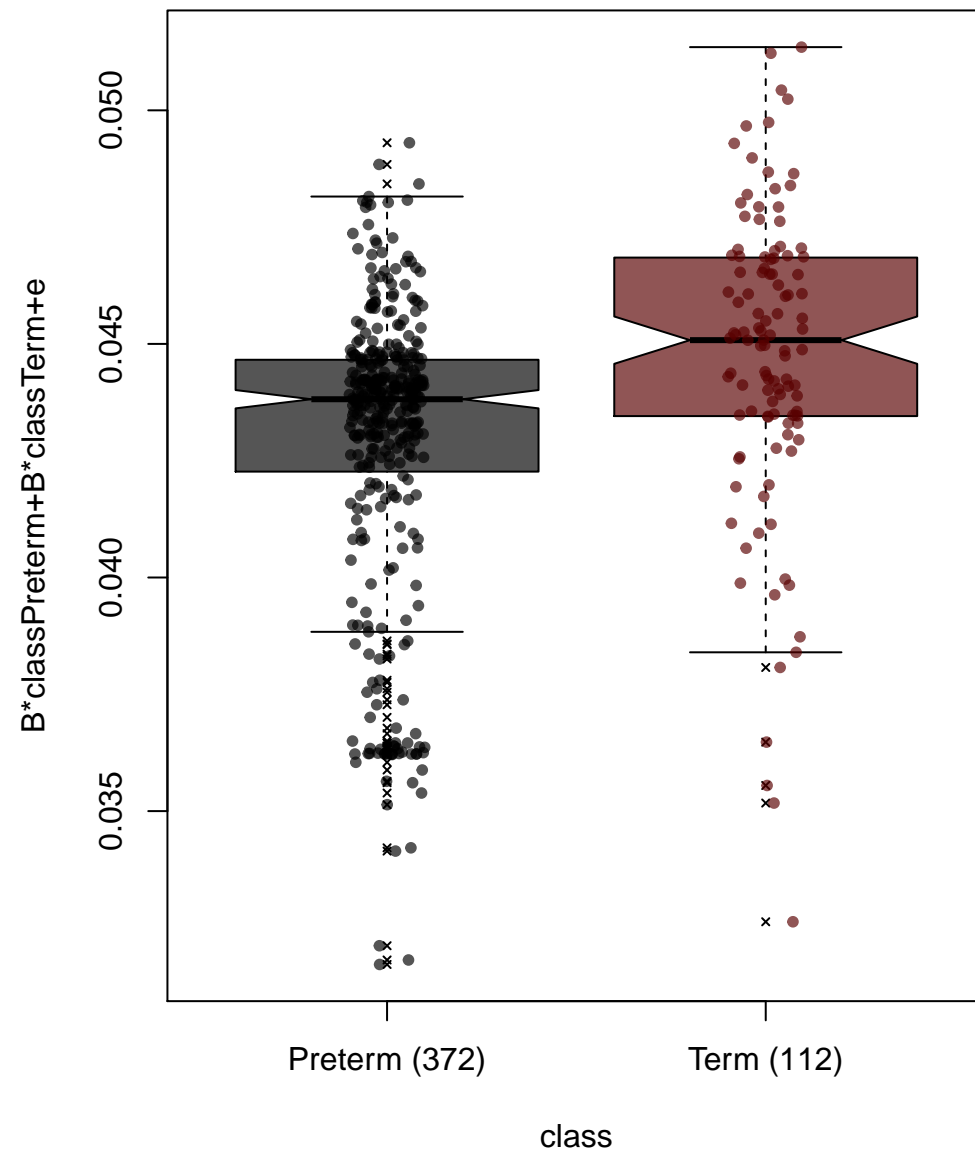

classTerm (-0.00211 sd 0.000398, p=1.79e-07, q=3.9e-07)

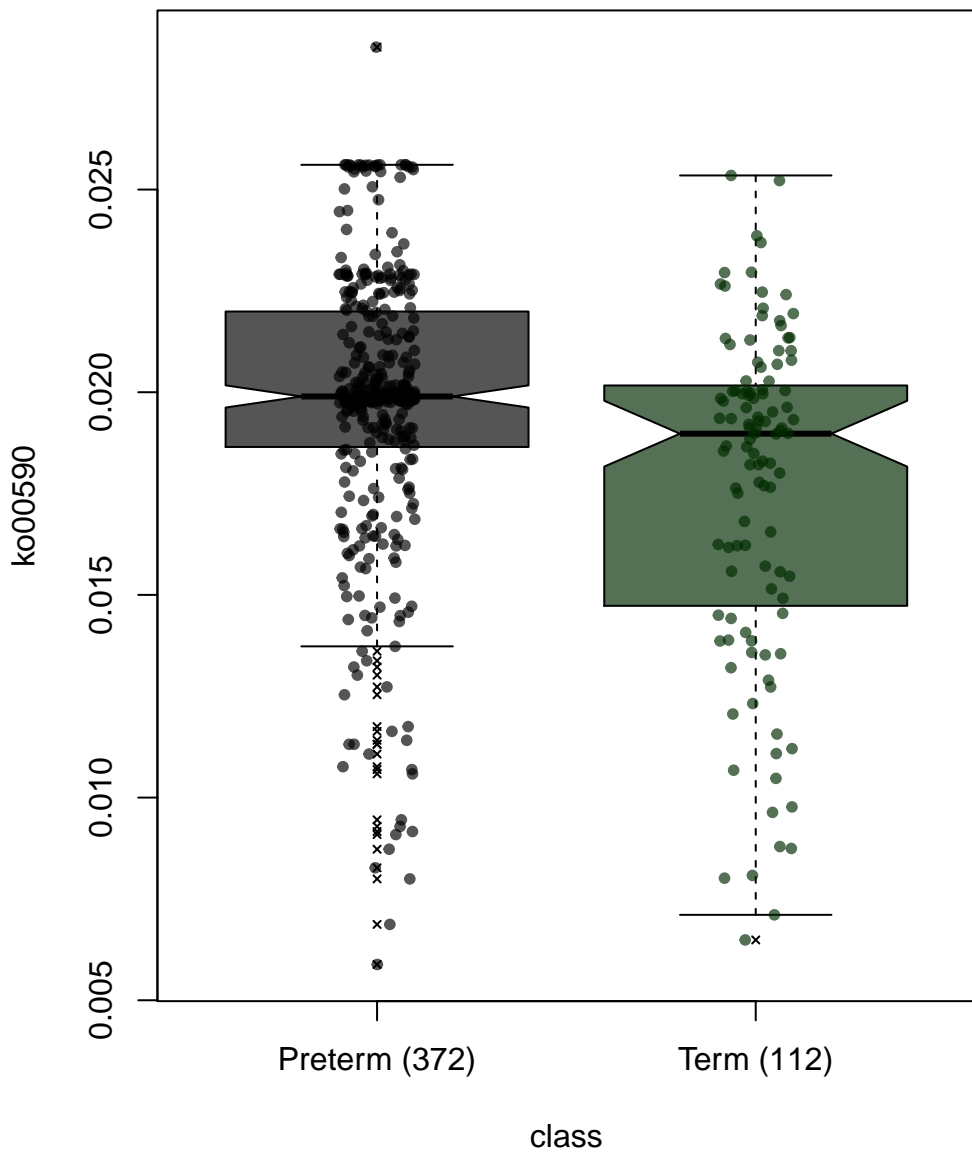

Partial Residual Plot

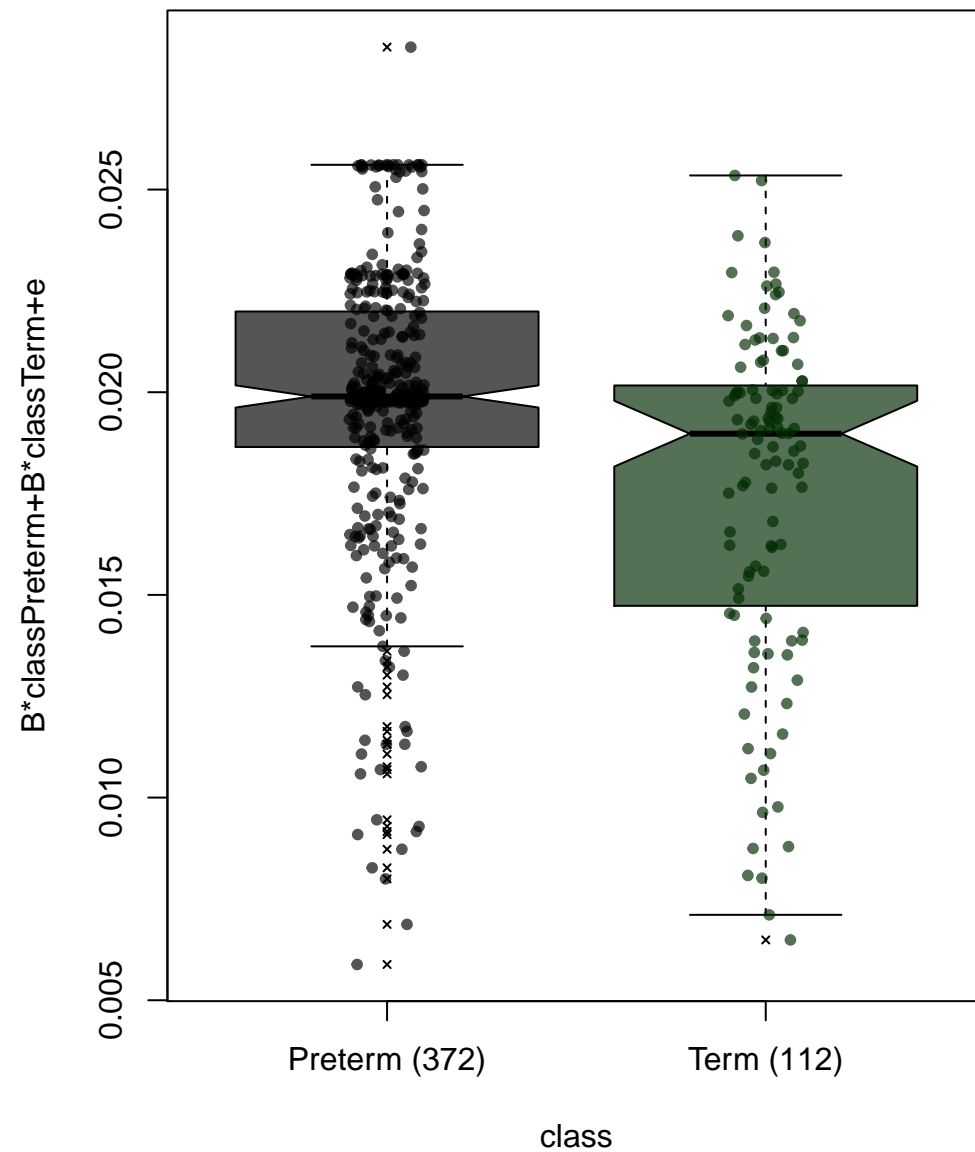

classTerm (-0.00259 sd 0.000489, p=1.81e-07, q=3.9e-07)

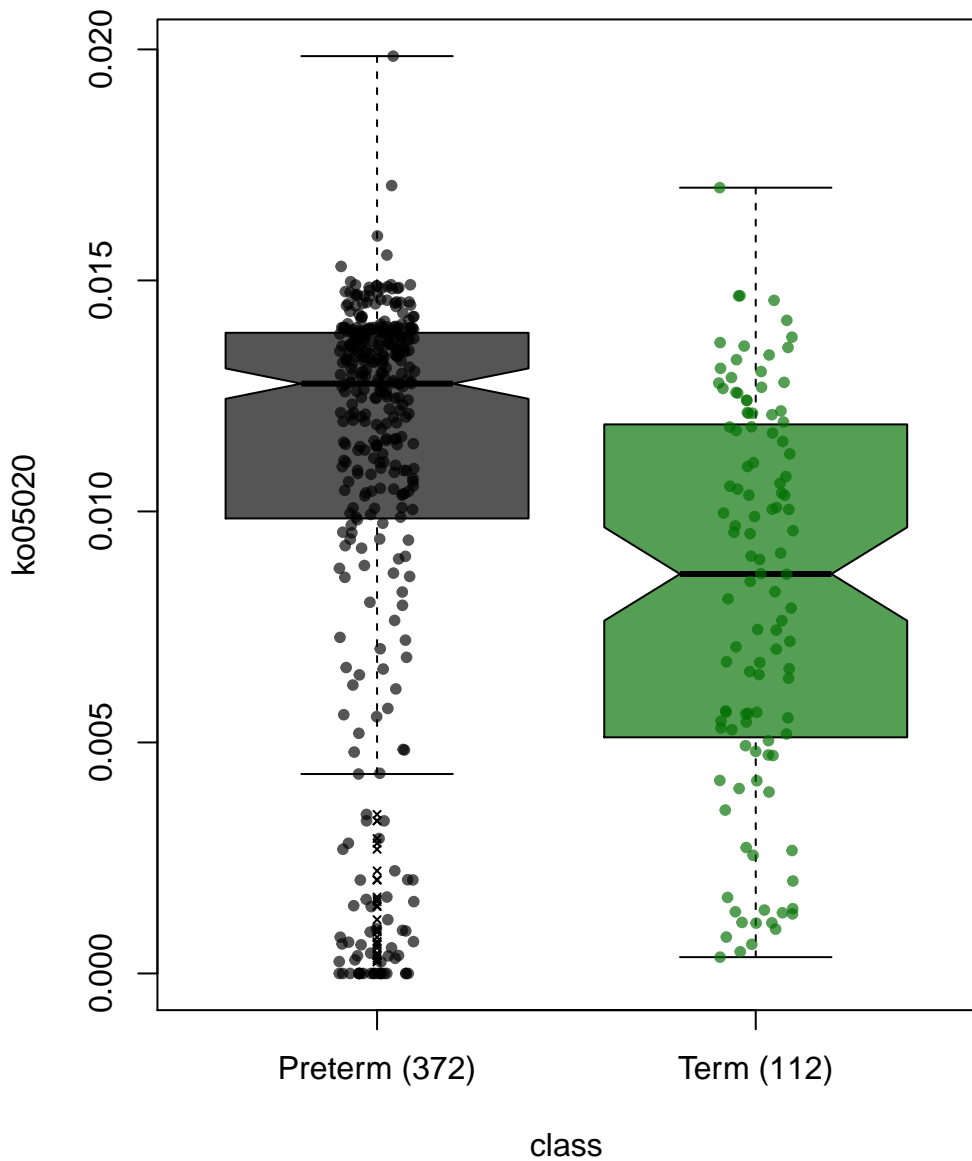

Partial Residual Plot

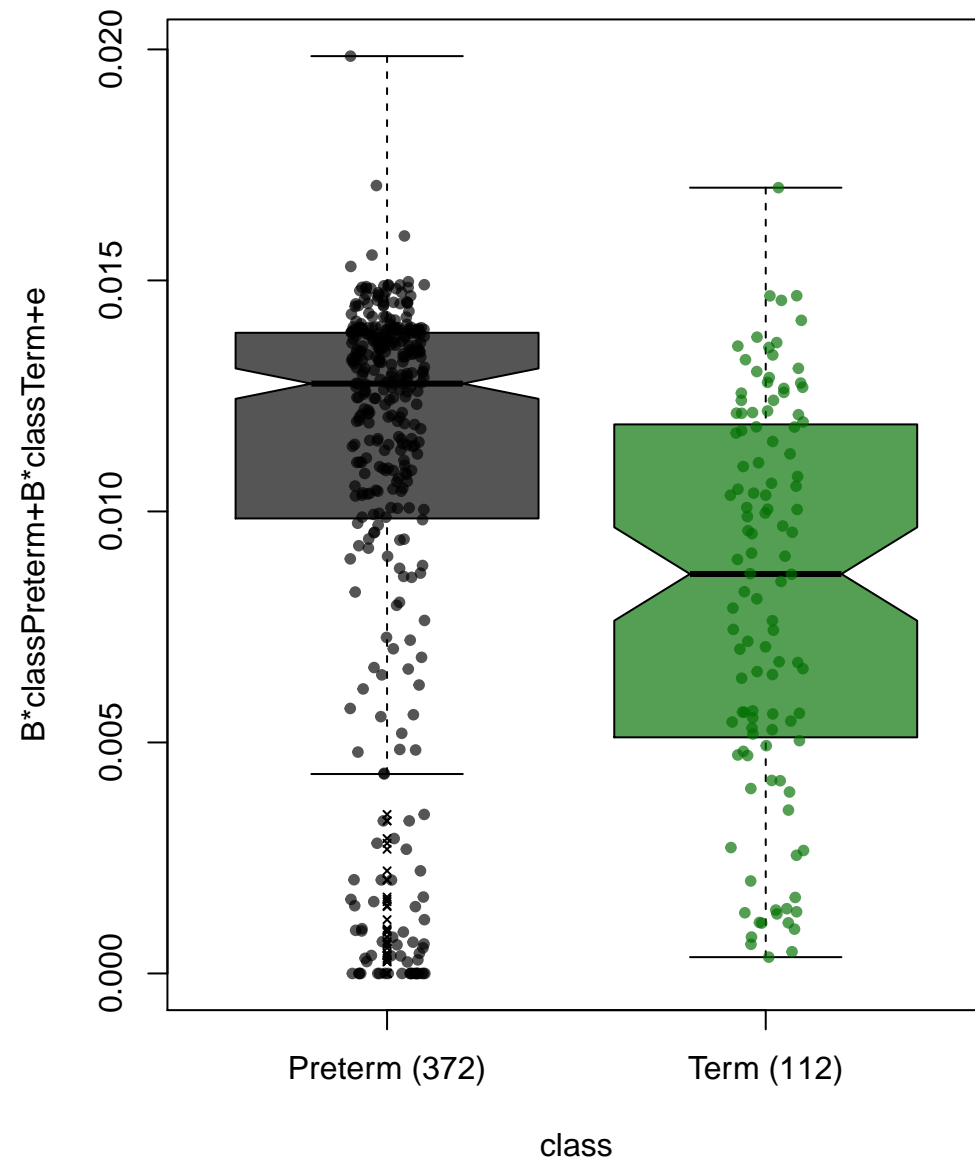

classTerm (0.00109 sd 0.000206, p=1.82e-07, q=3.9e-07)

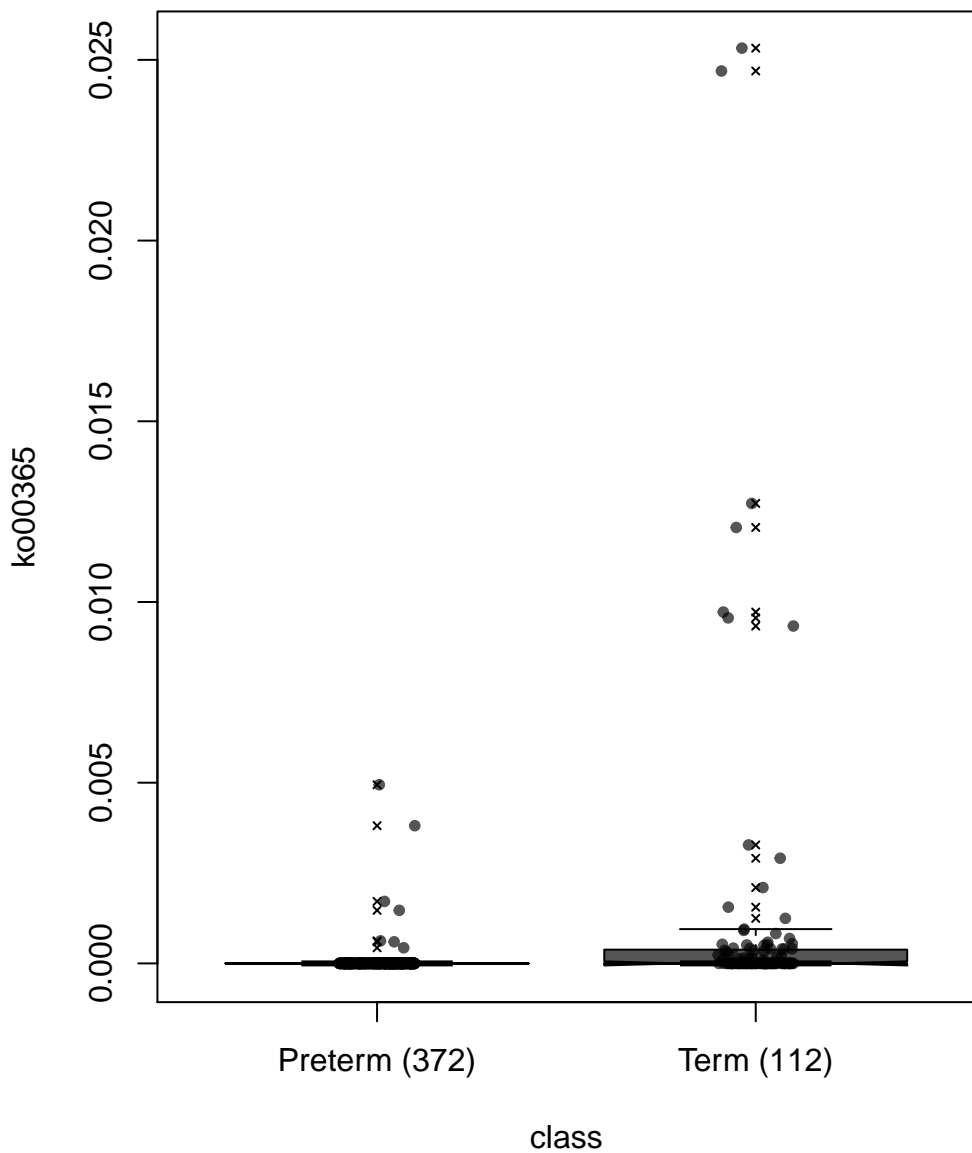

Partial Residual Plot

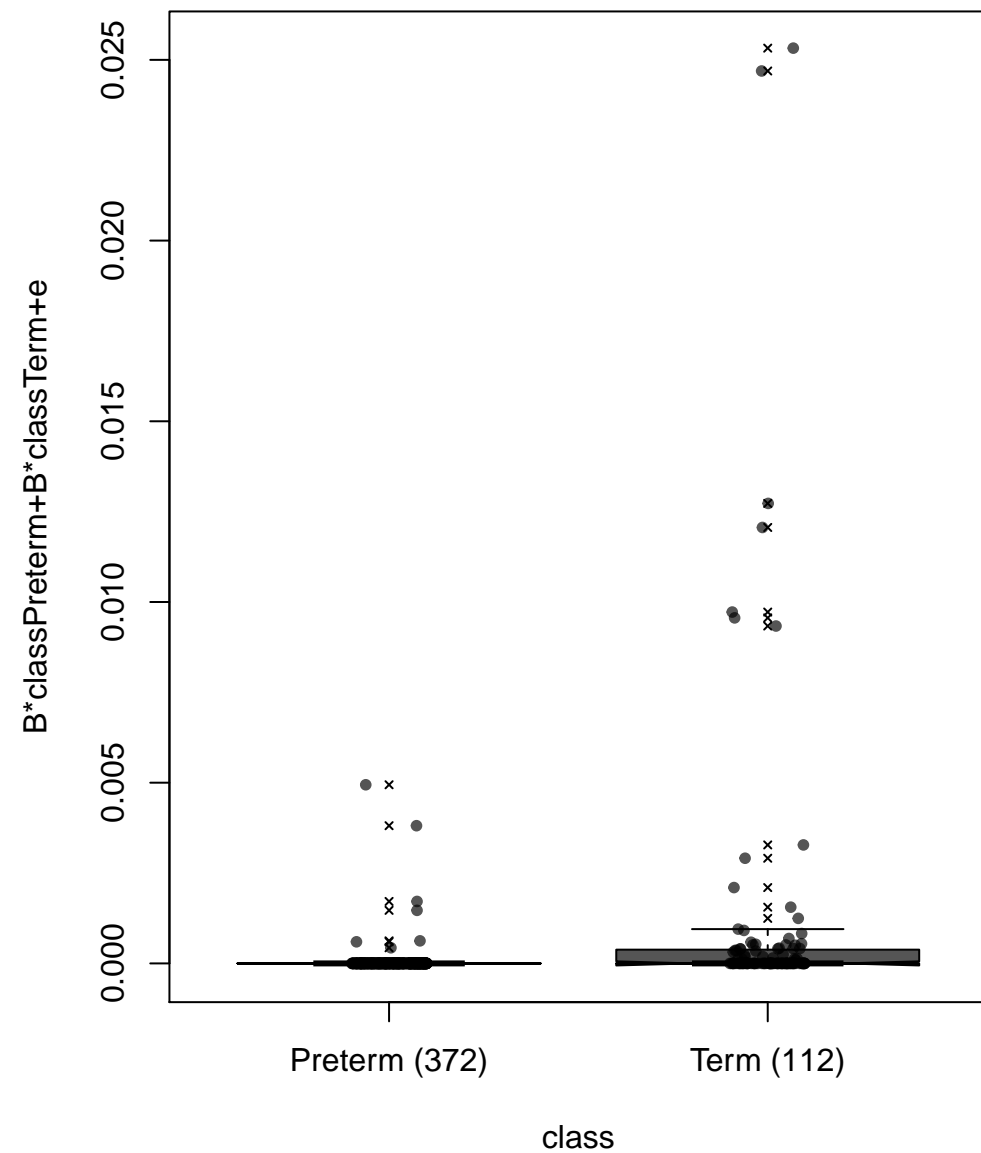

classTerm (0.00345 sd 0.000655, p=2.03e-07, q=4.33e-07)

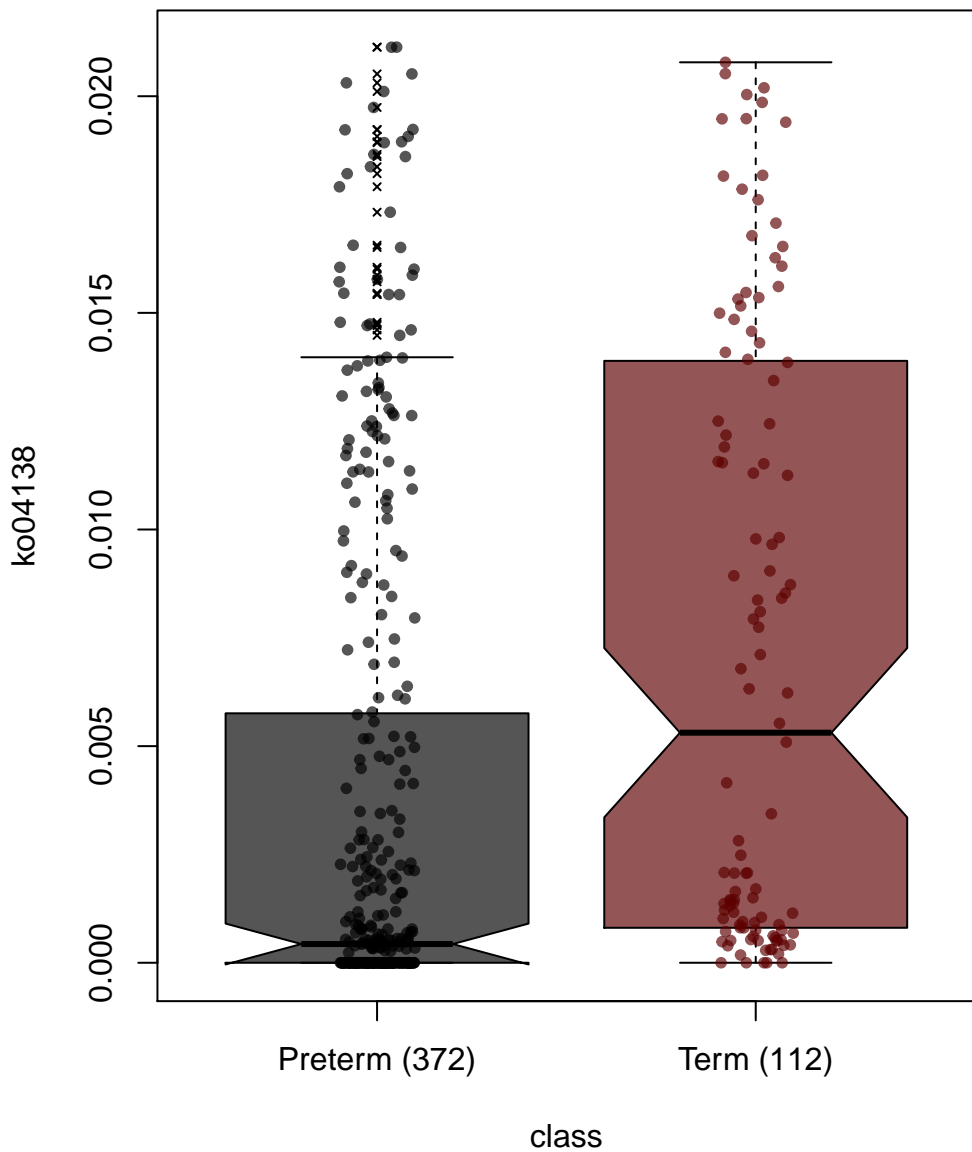

Partial Residual Plot

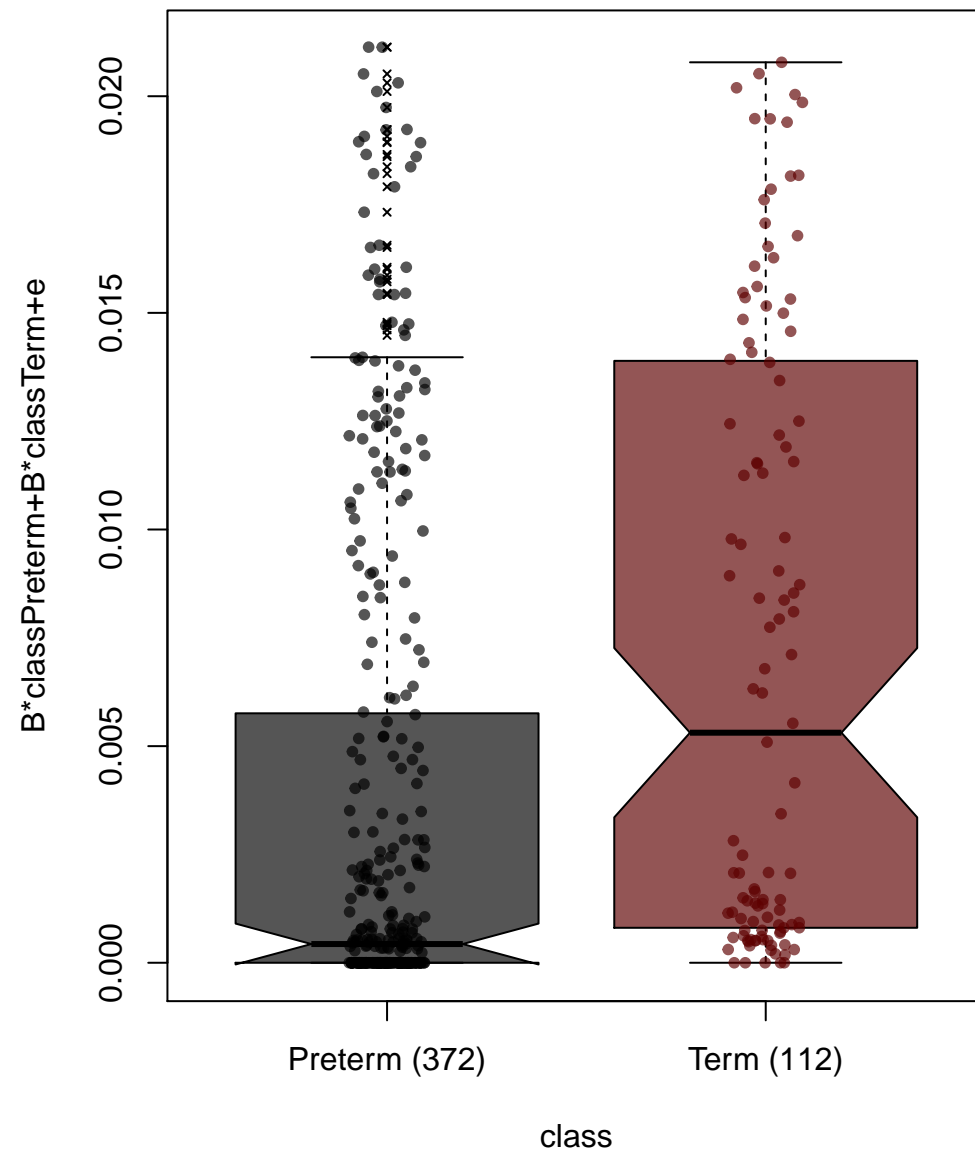



classTerm (−0.00484 sd 0.000927, p=2.59e−07, q=5.48e−07)

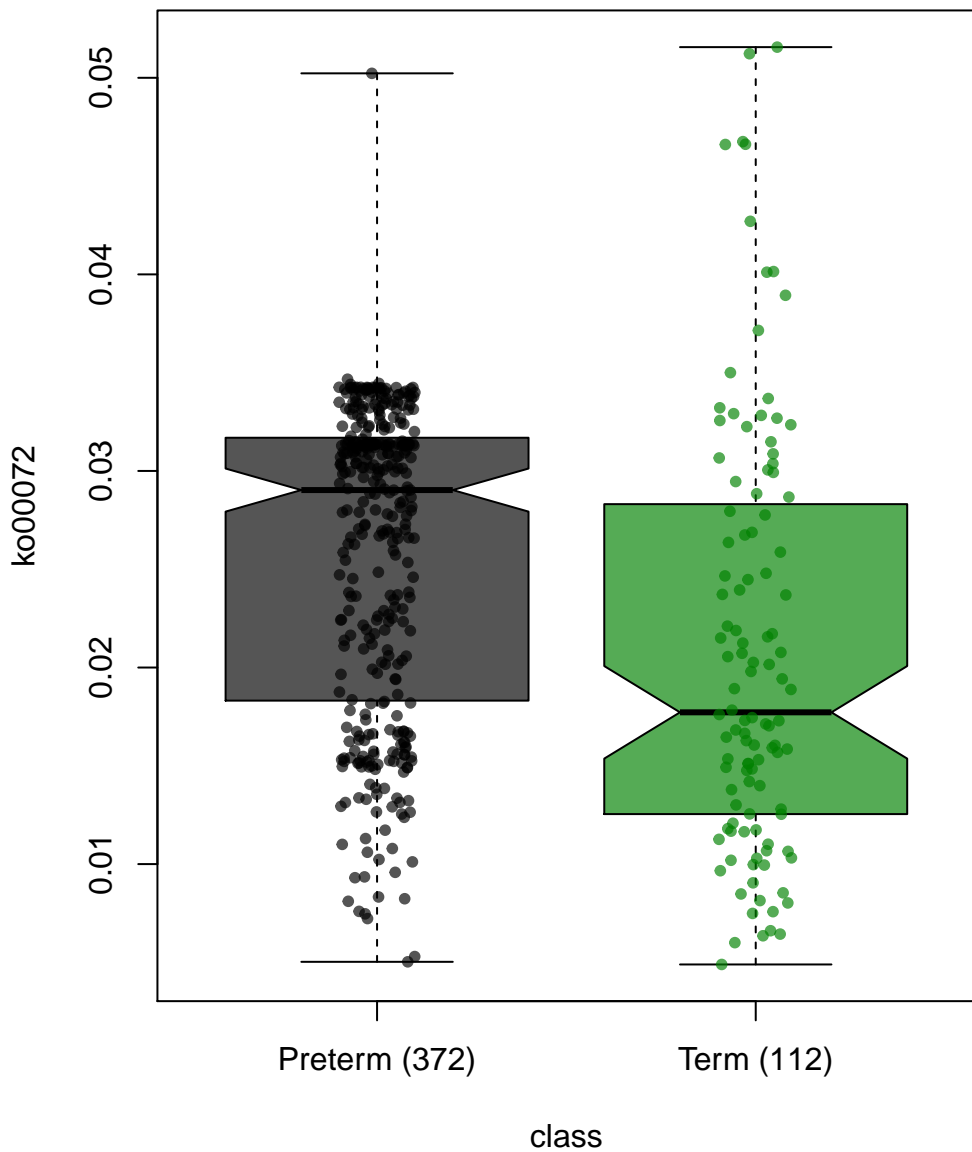

Partial Residual Plot

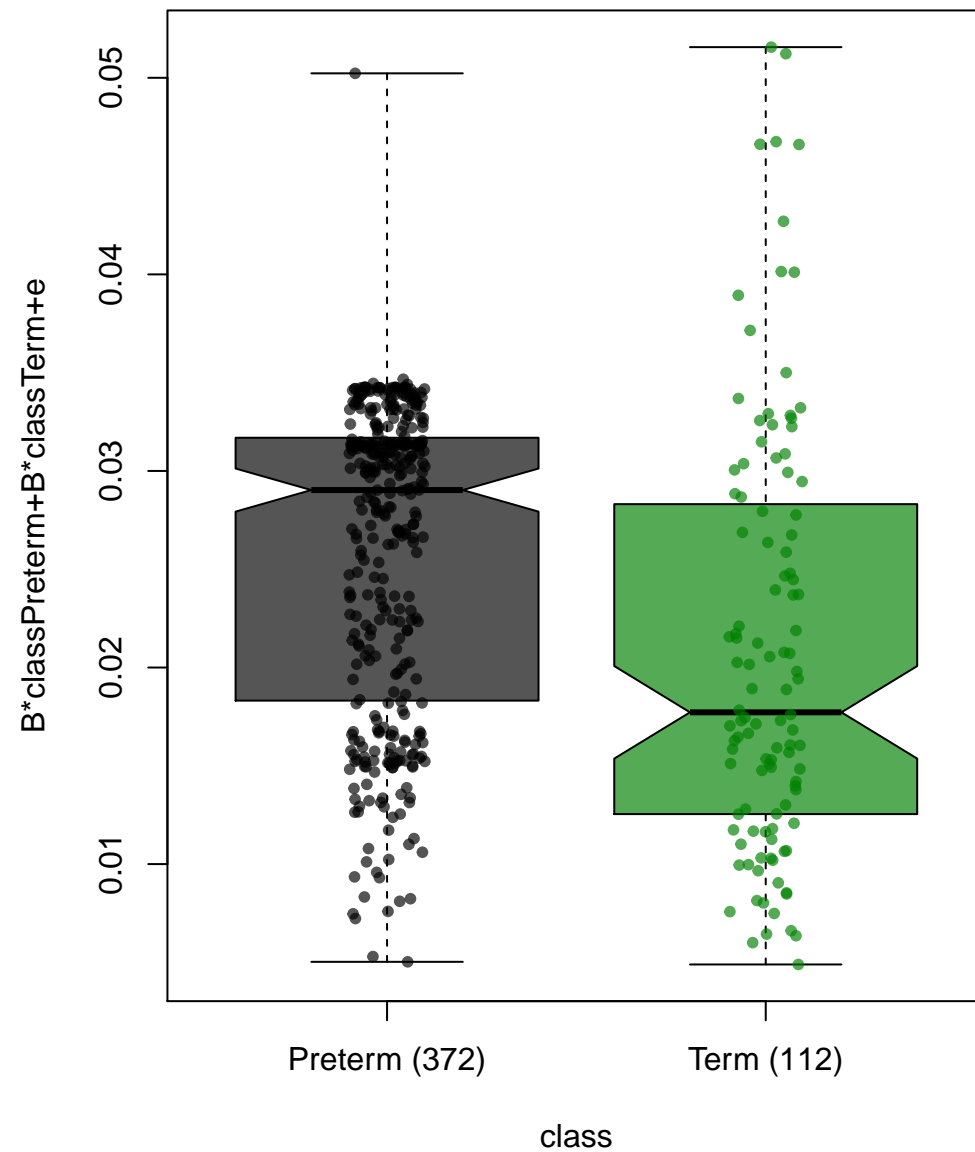

classTerm ( $-0.0118$  sd  $0.00226$ ,  $p=2.66e-07$ ,  $q=5.59e-07$ )

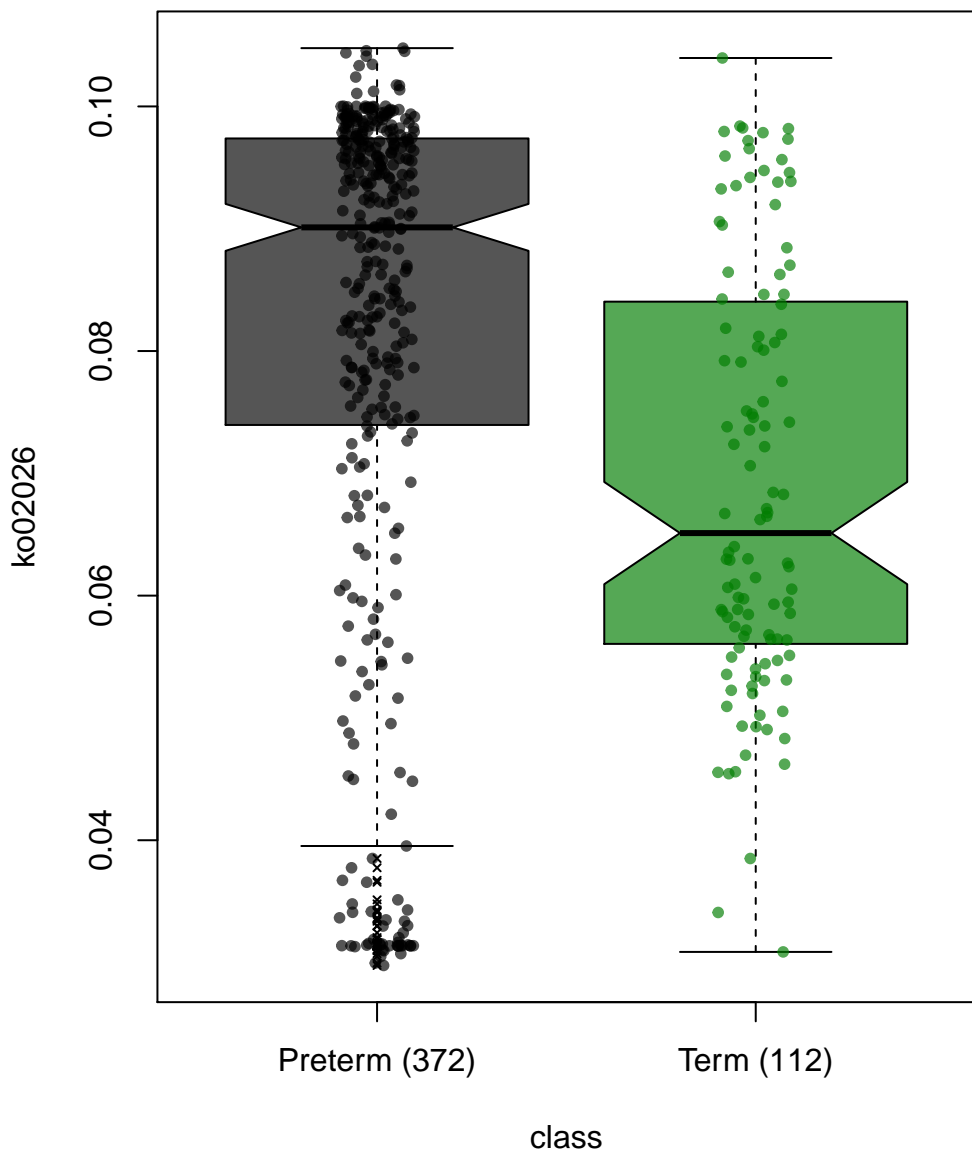

Partial Residual Plot

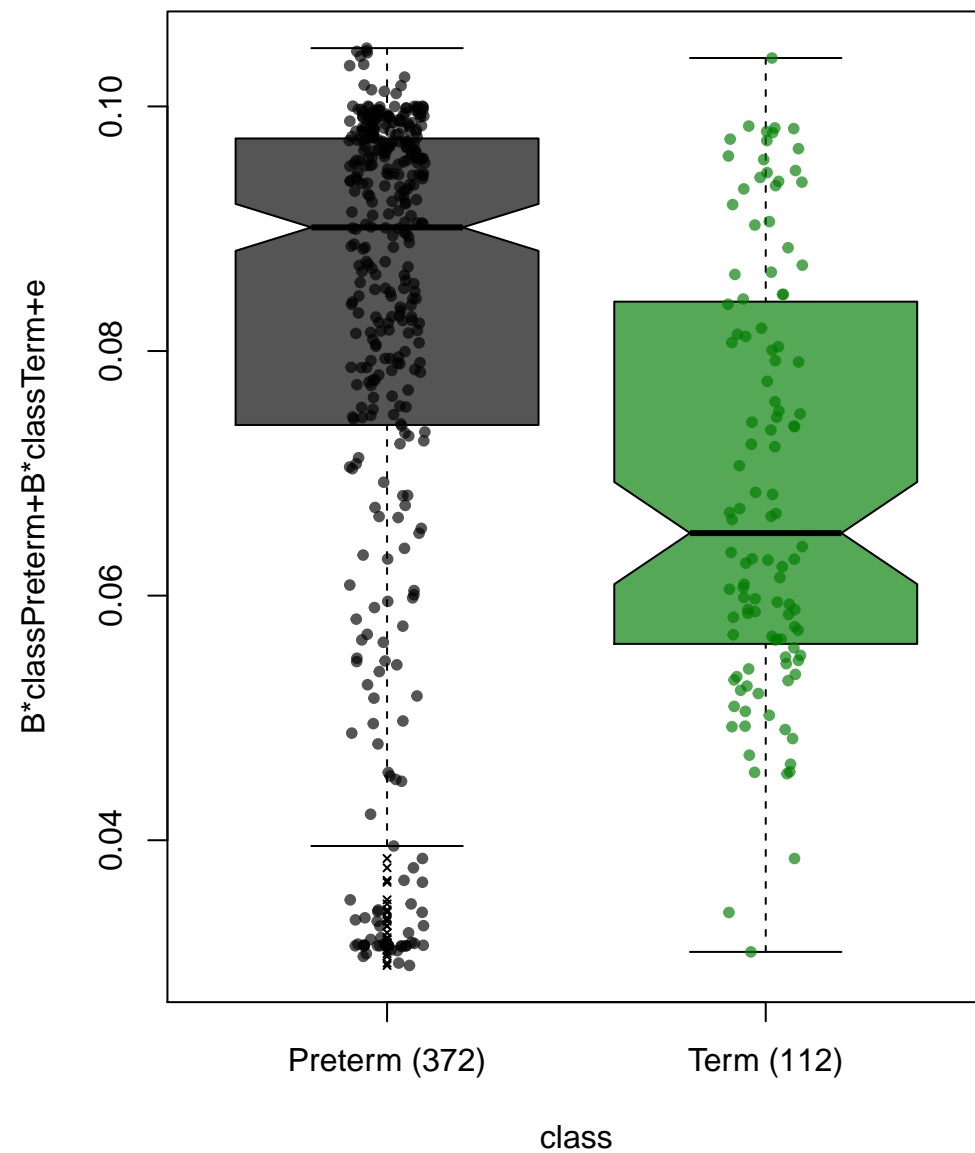

classTerm (−0.00256 sd 0.000493, p=3.06e−07, q=6.37e−07)

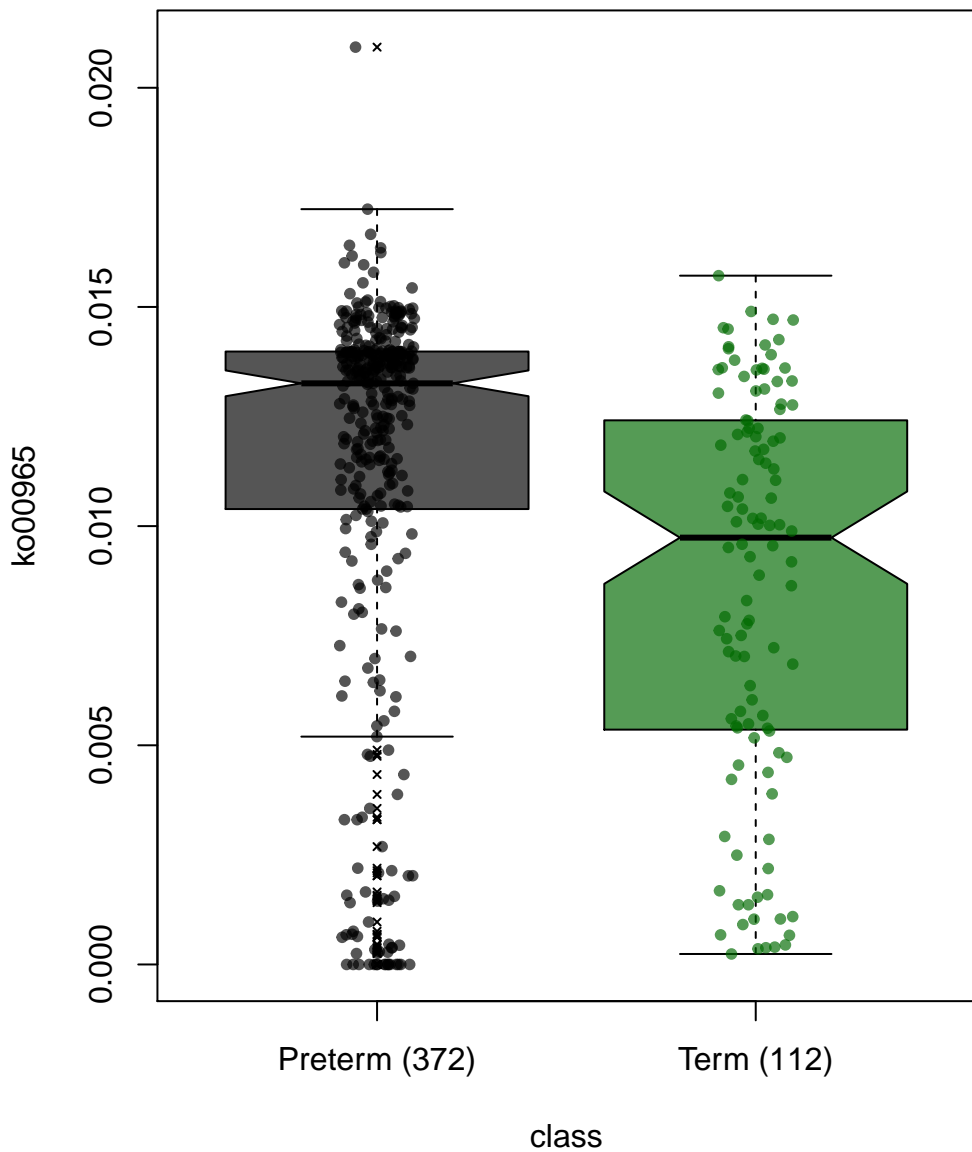

Partial Residual Plot

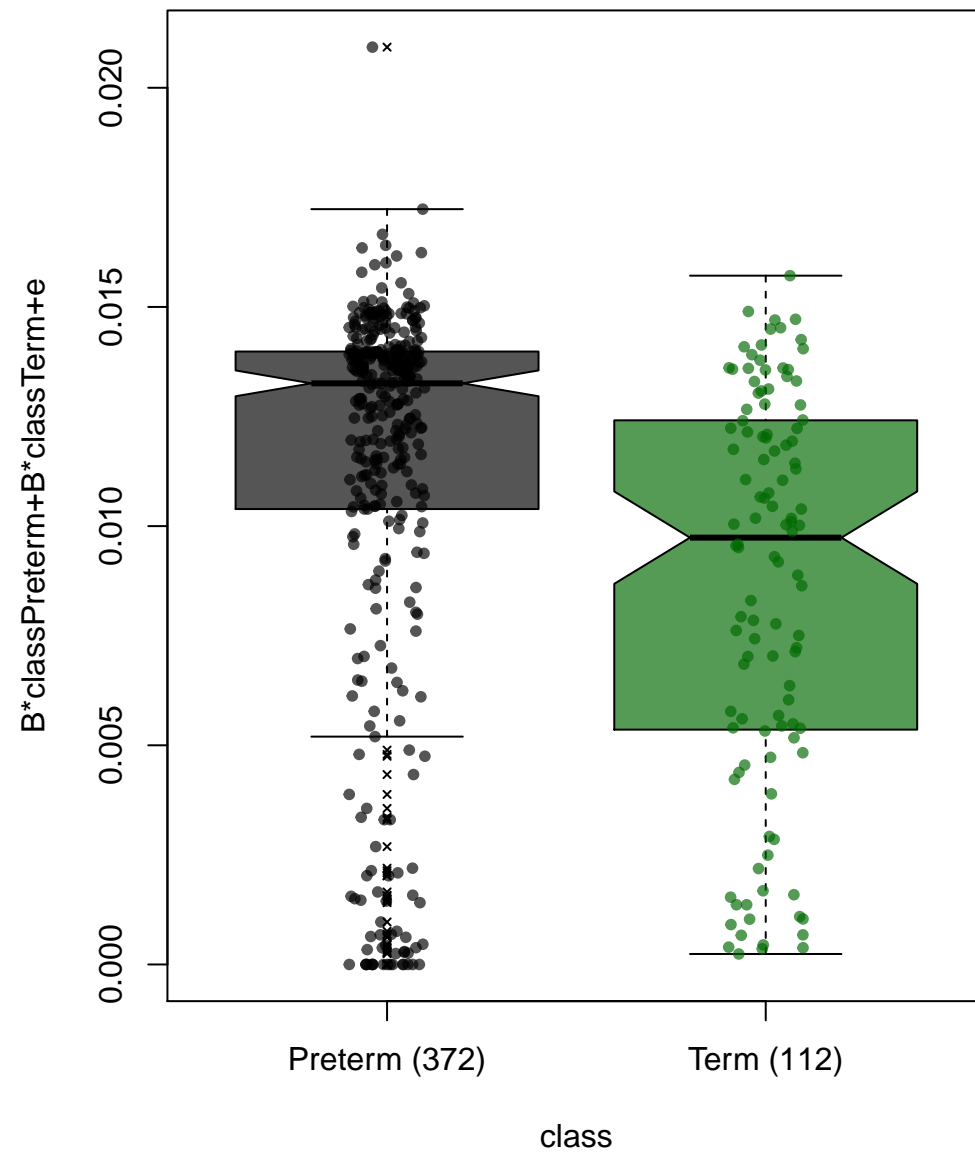

classTerm (0.00248 sd 0.000486, p=4.77e-07, q=9.85e-07)

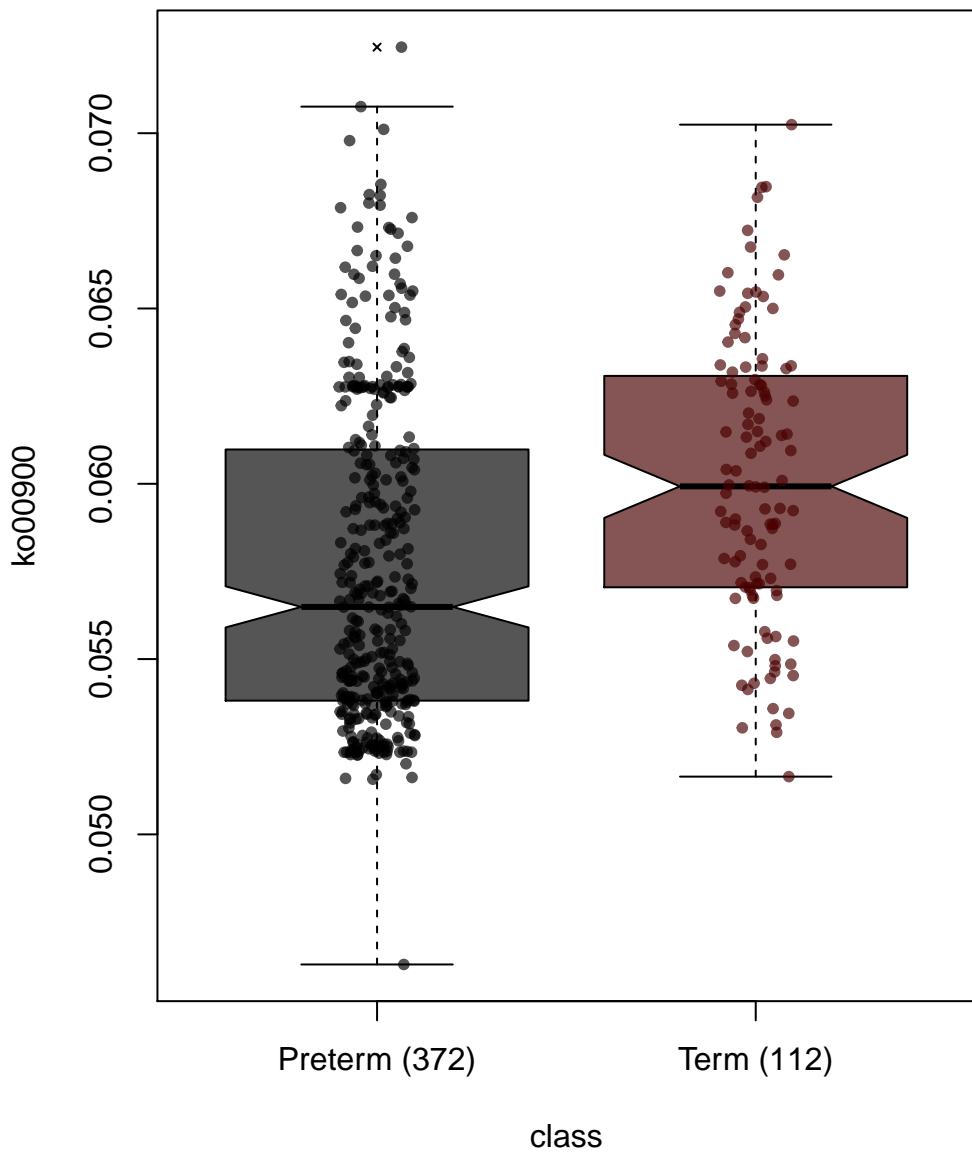

Partial Residual Plot

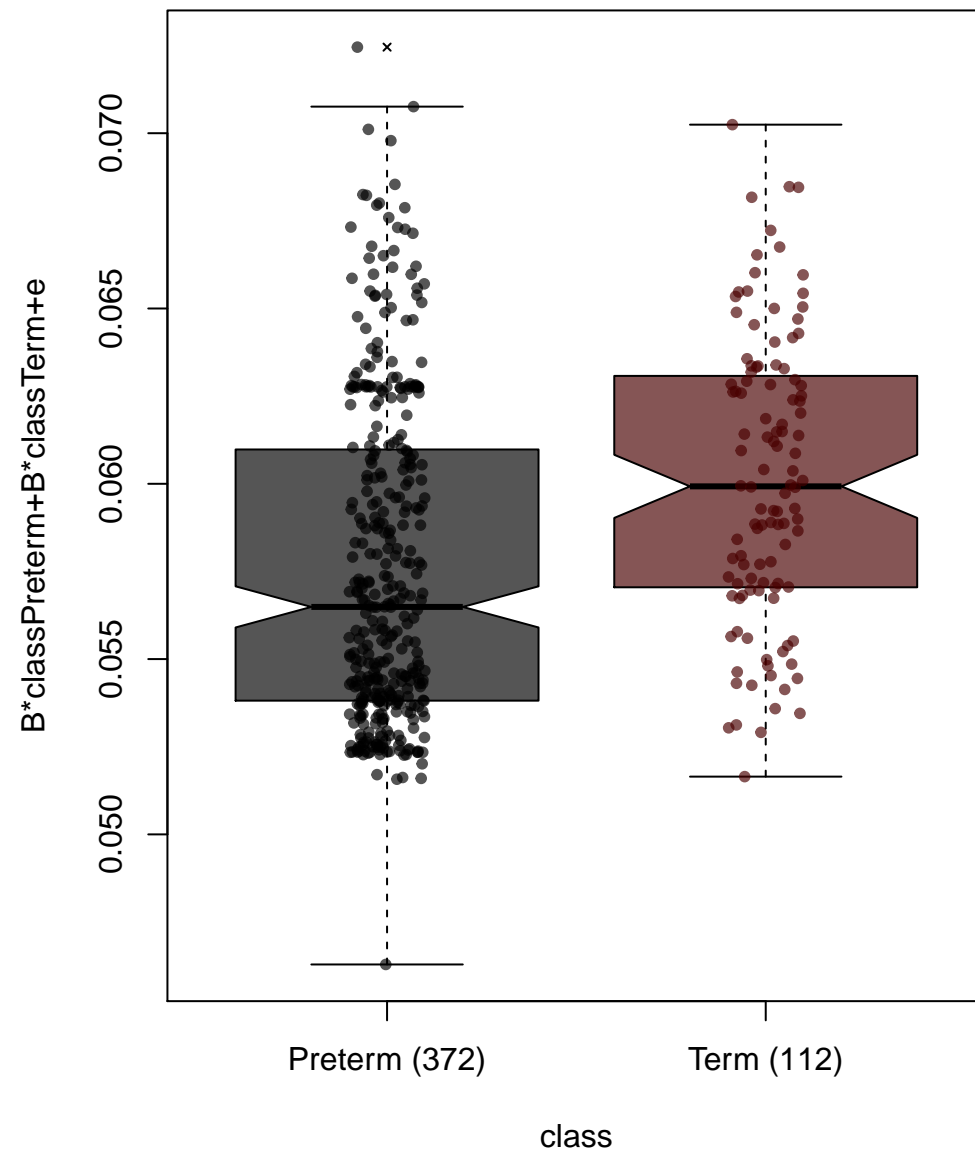

classTerm (0.000897 sd 0.000176, p=4.92e-07, q=1.01e-06)

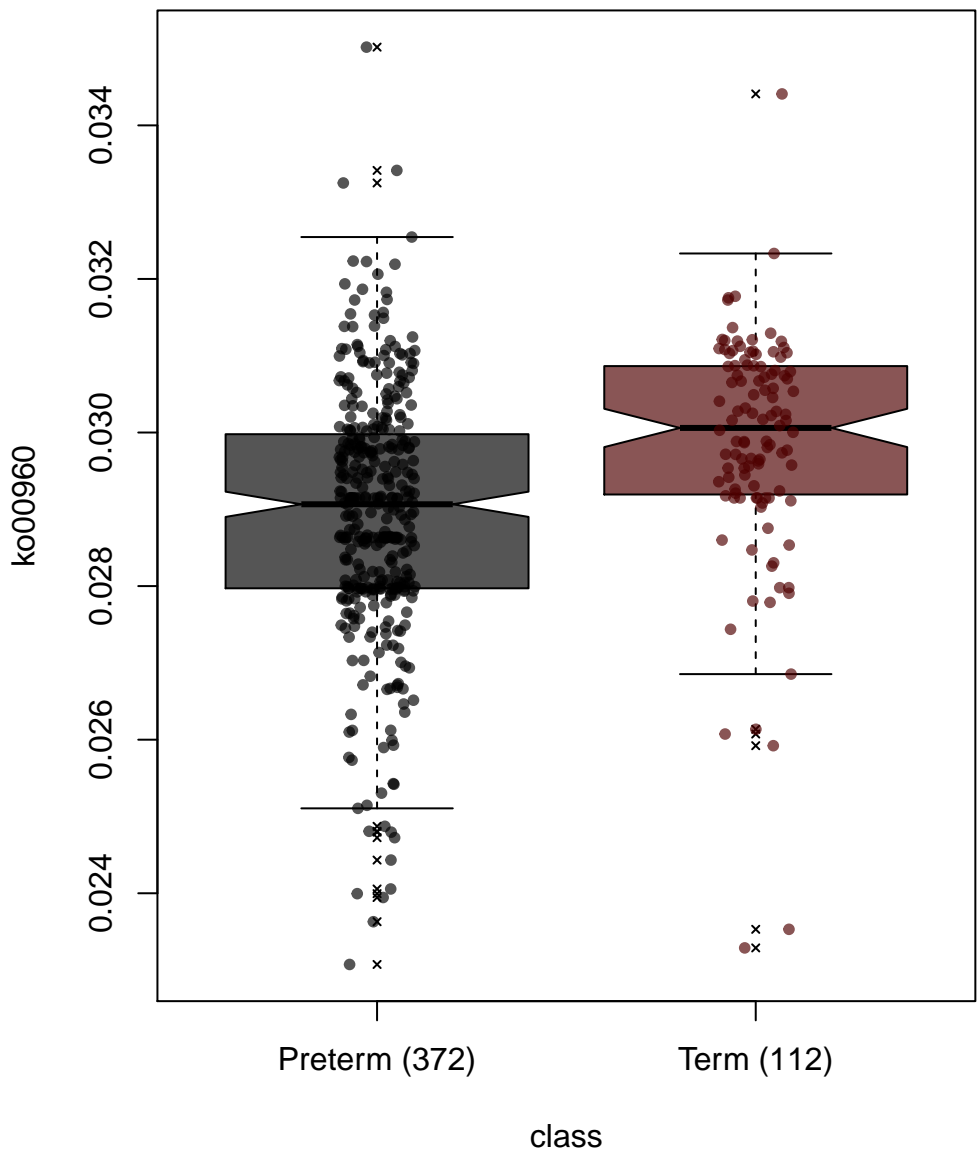

Partial Residual Plot

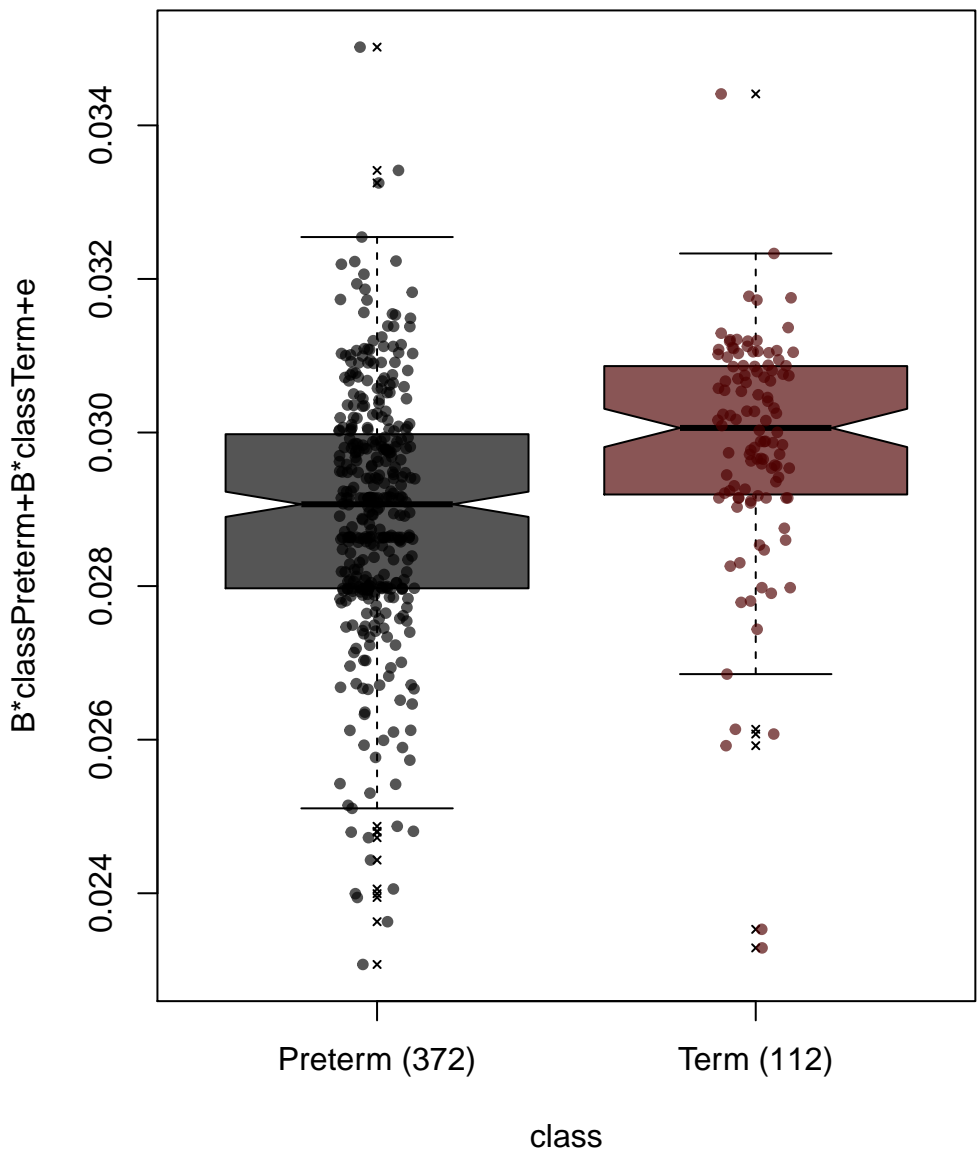

classTerm ( $-0.00167$  sd  $0.00033$ ,  $p=5.98e-07$ ,  $q=1.22e-06$ )

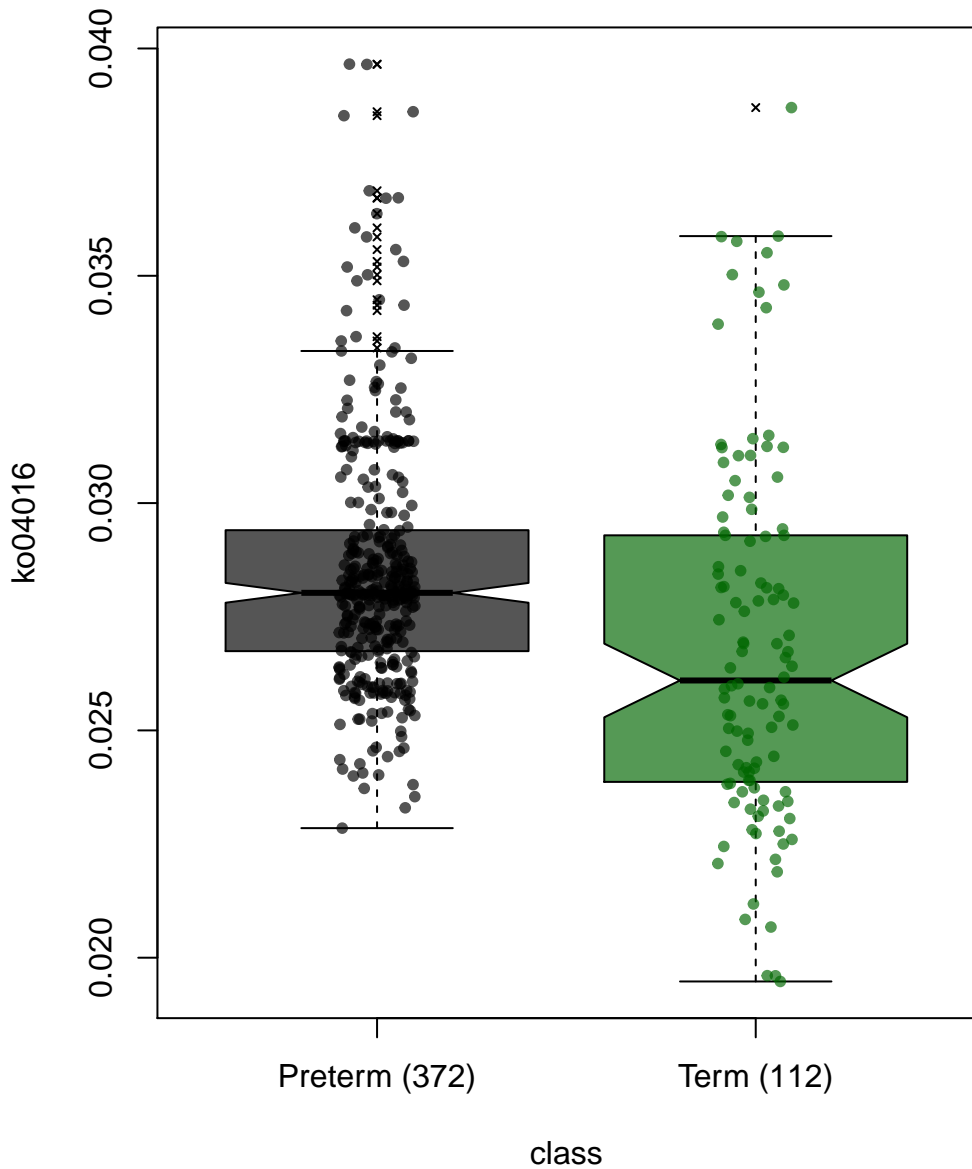

Partial Residual Plot

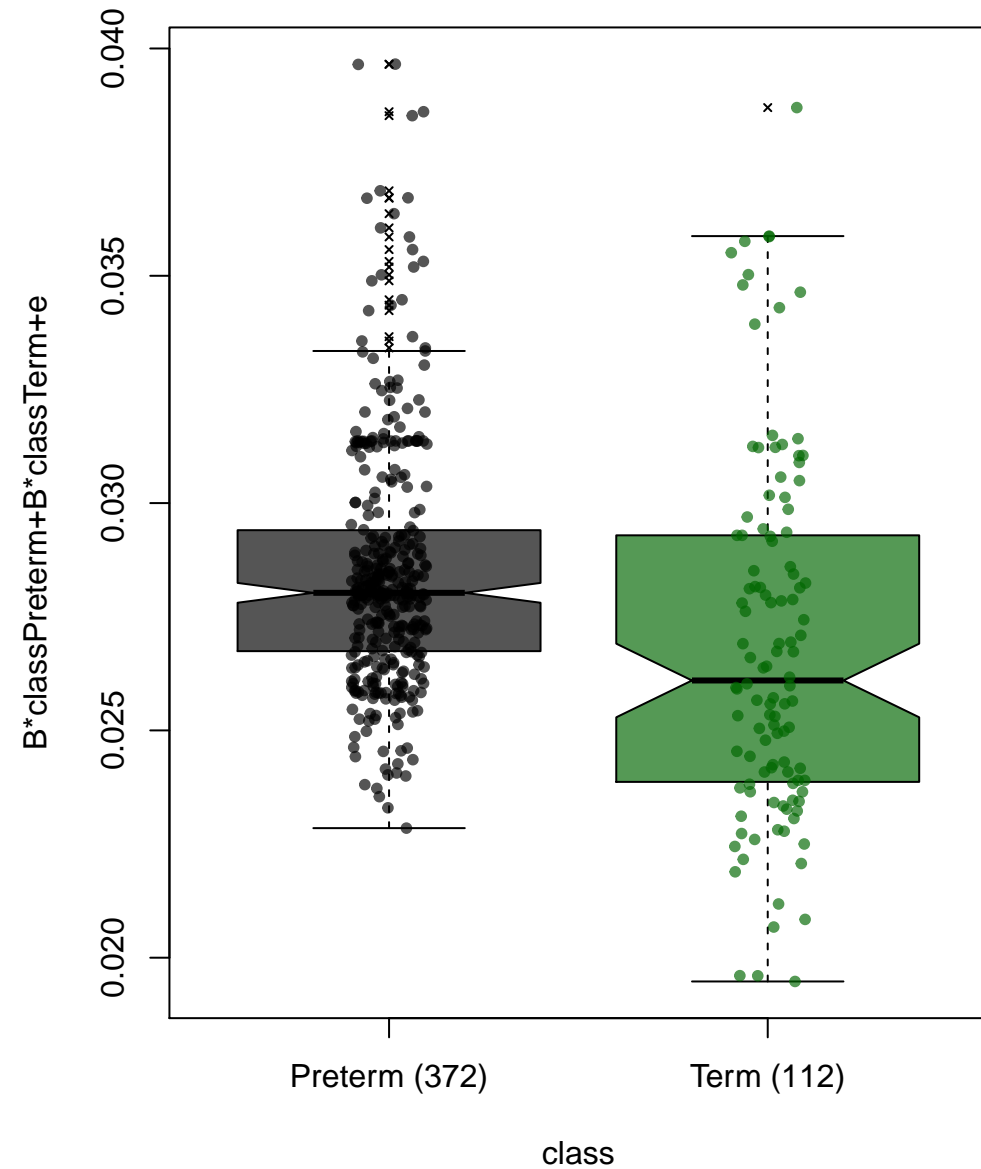

classTerm (0.00219 sd 0.000434, p=6.75e-07, q=1.34e-06)

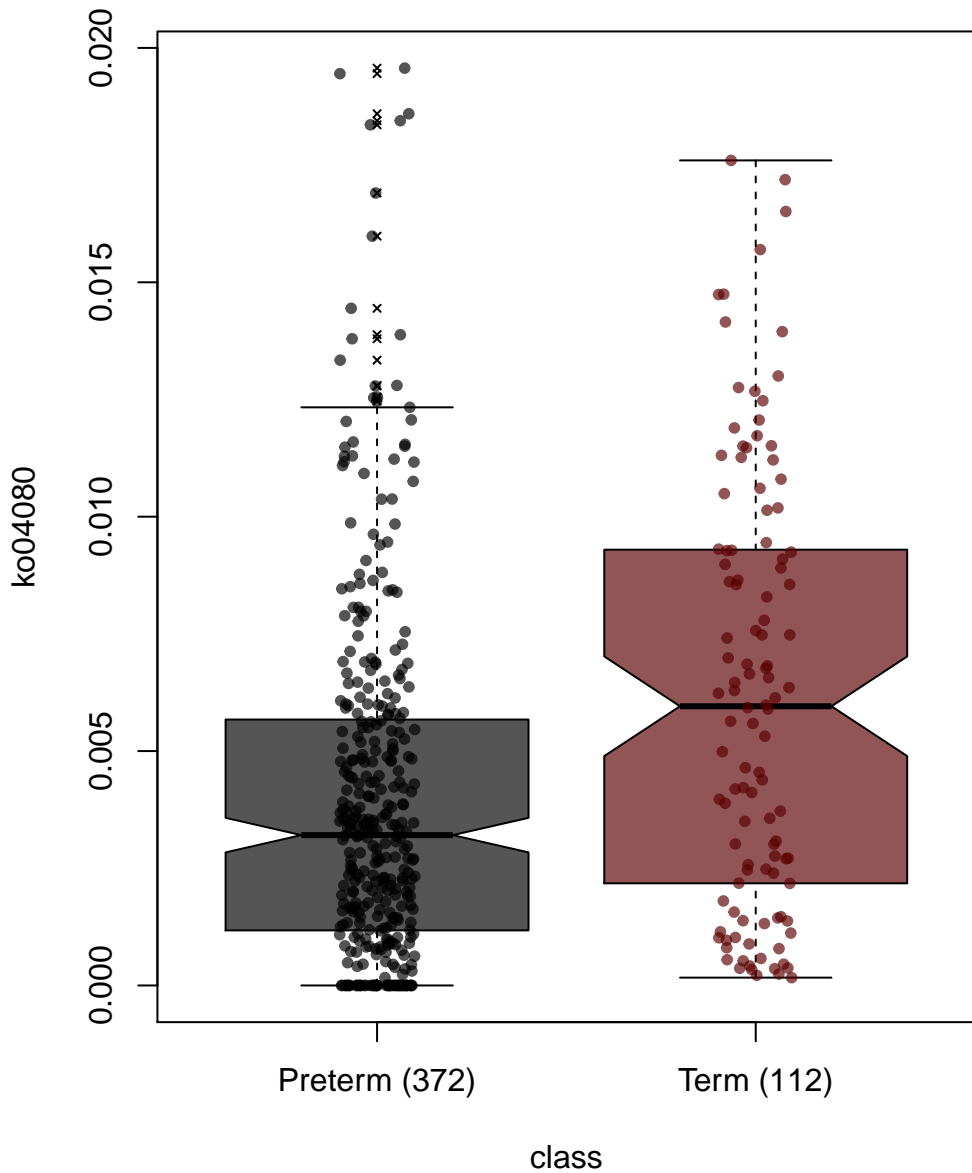

Partial Residual Plot

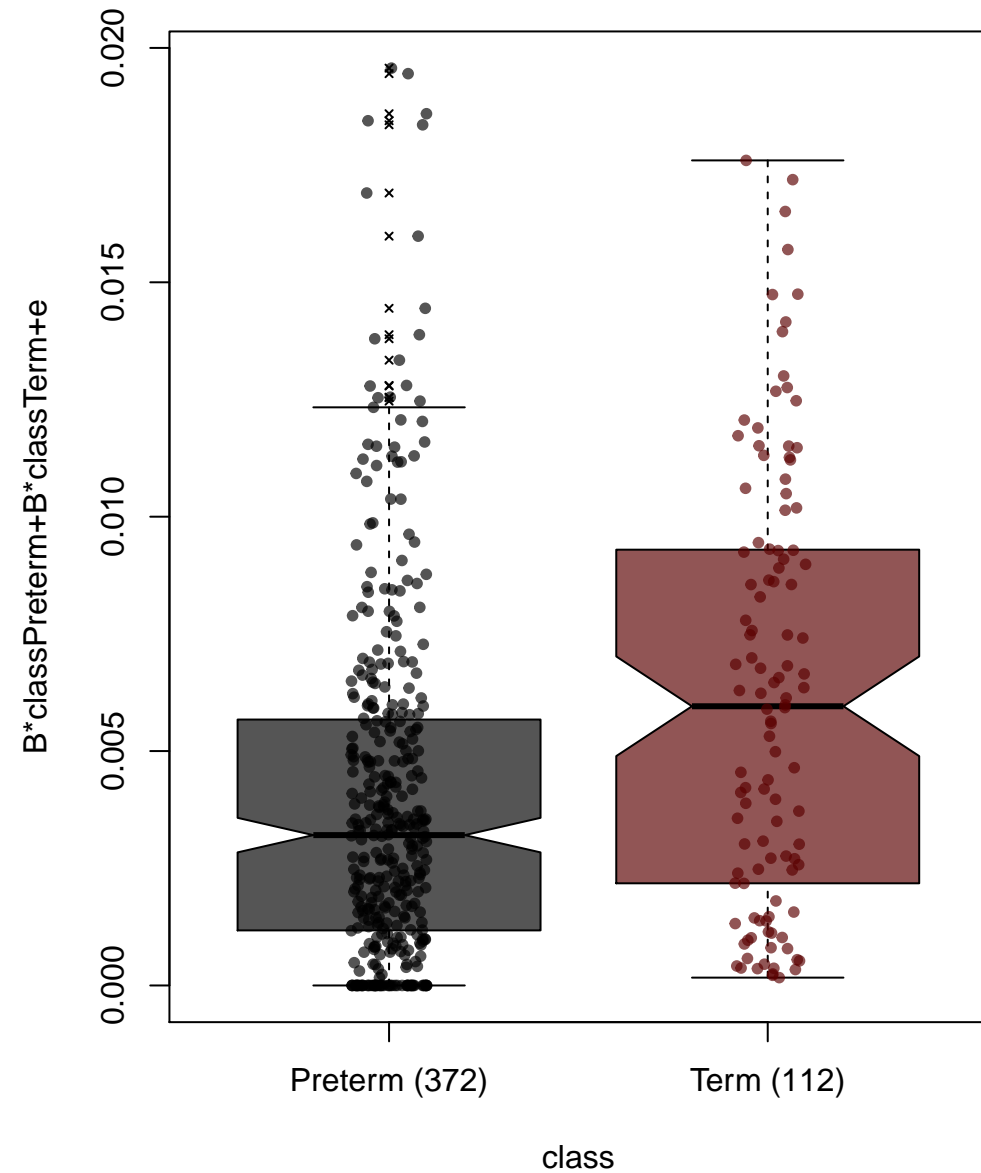

classTerm (0.00219 sd 0.000434, p=6.75e-07, q=1.34e-06)

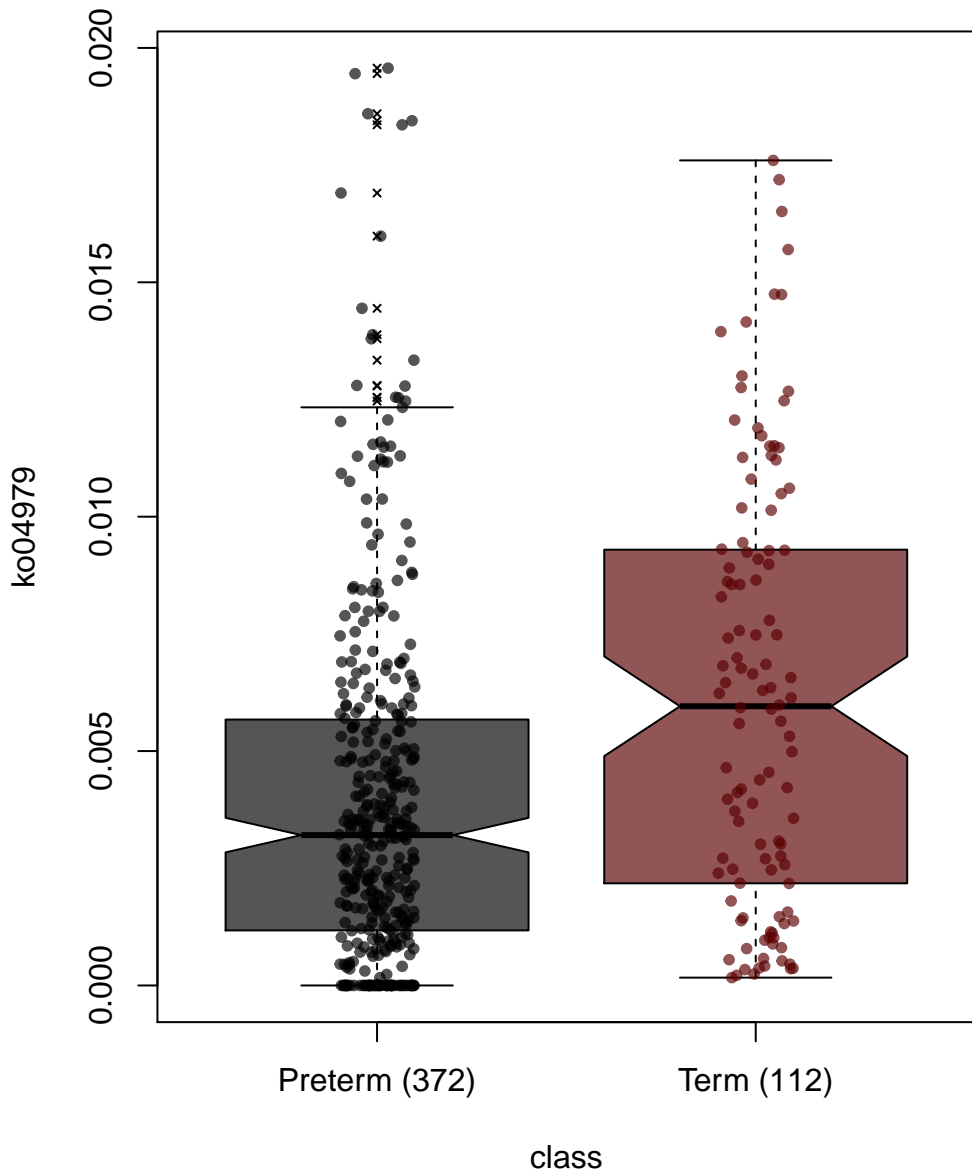

Partial Residual Plot

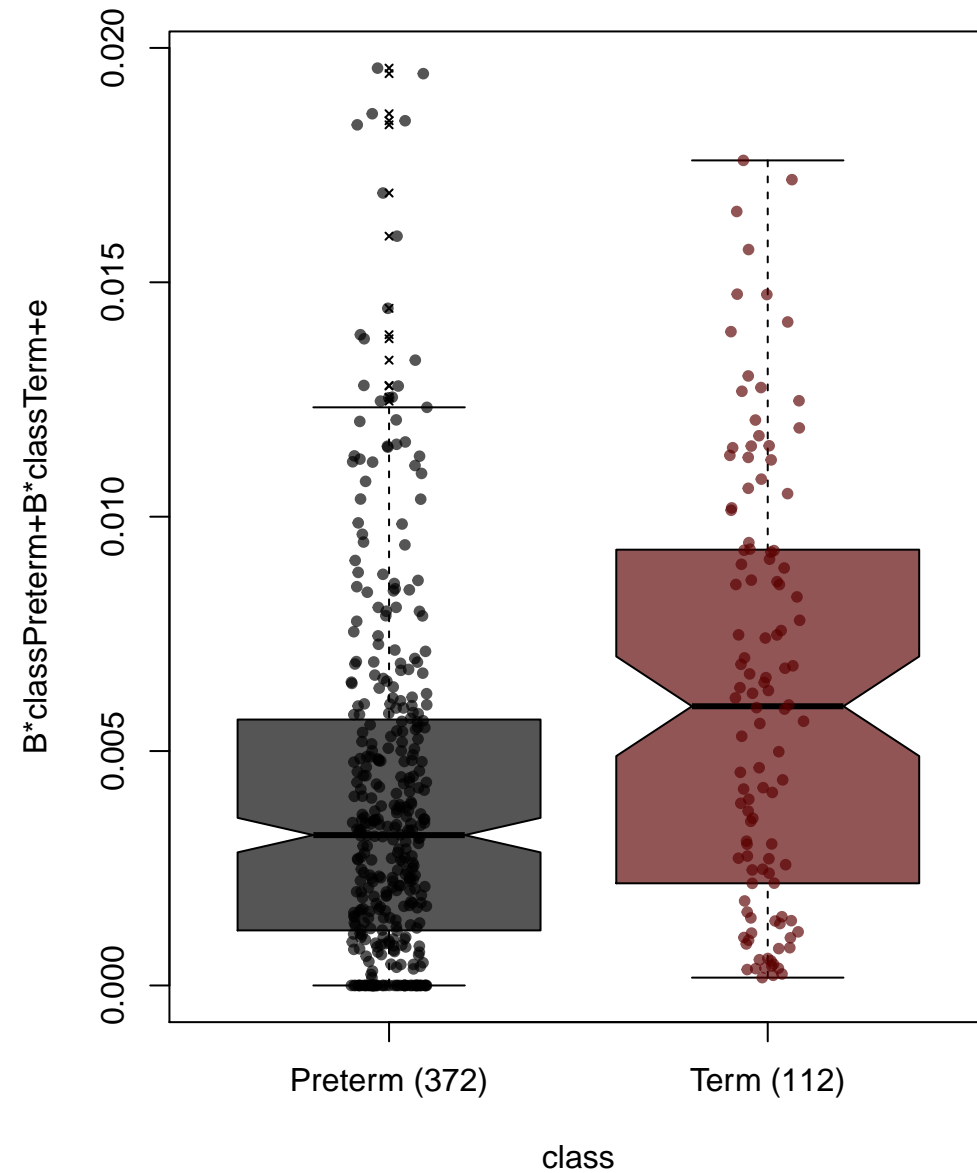



classTerm (0.00219 sd 0.000434, p=6.75e-07, q=1.34e-06)

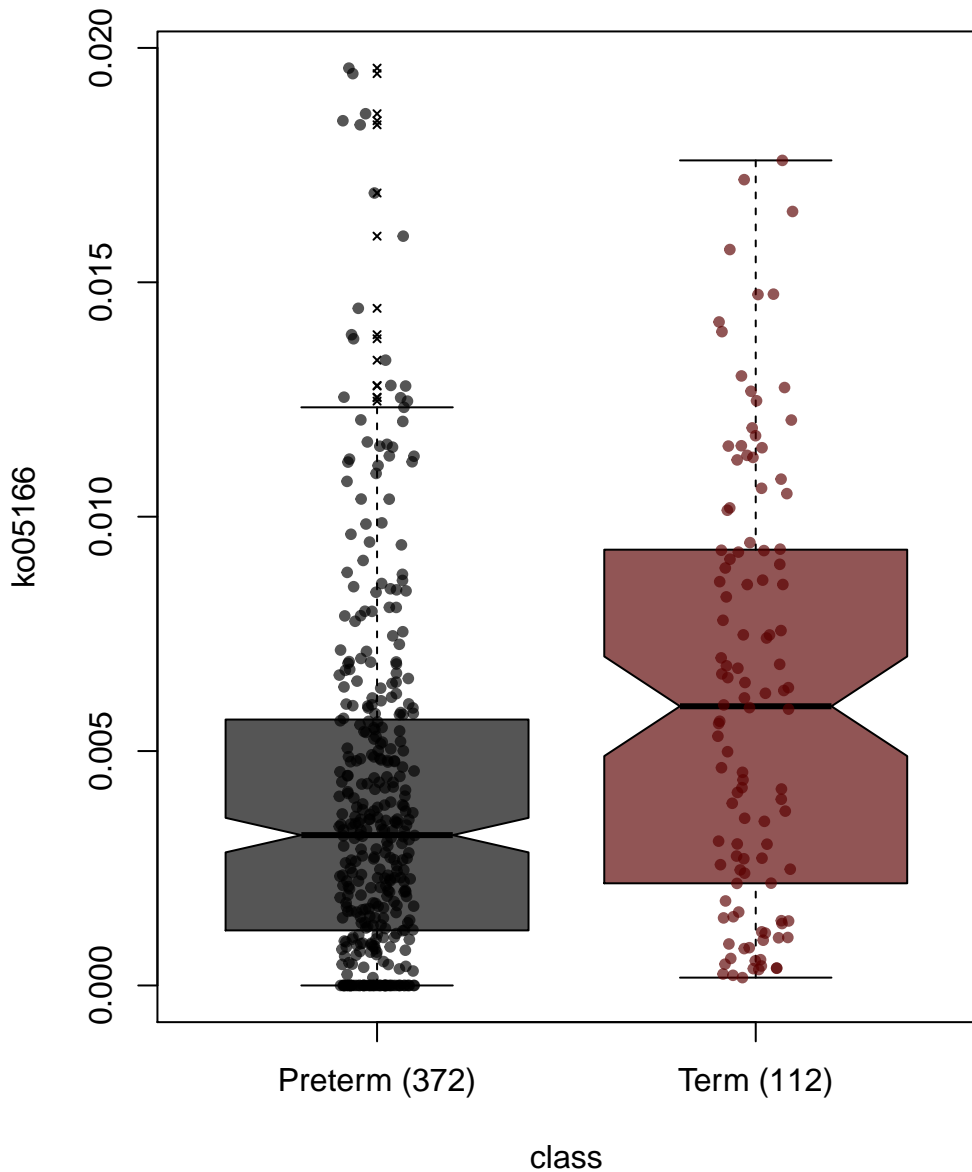

Partial Residual Plot

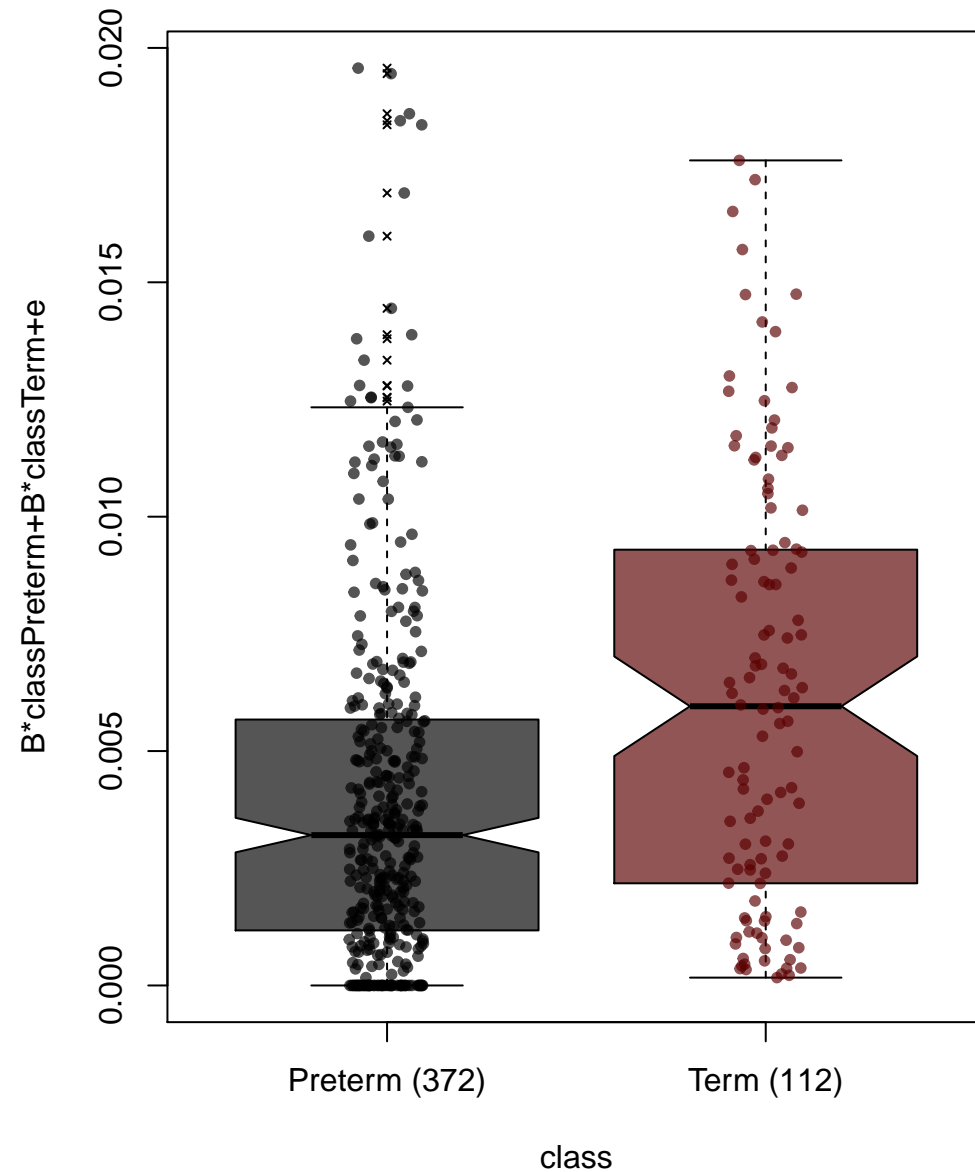

classTerm (-0.00419 sd 0.000846, p=9.8e-07, q=1.94e-06)

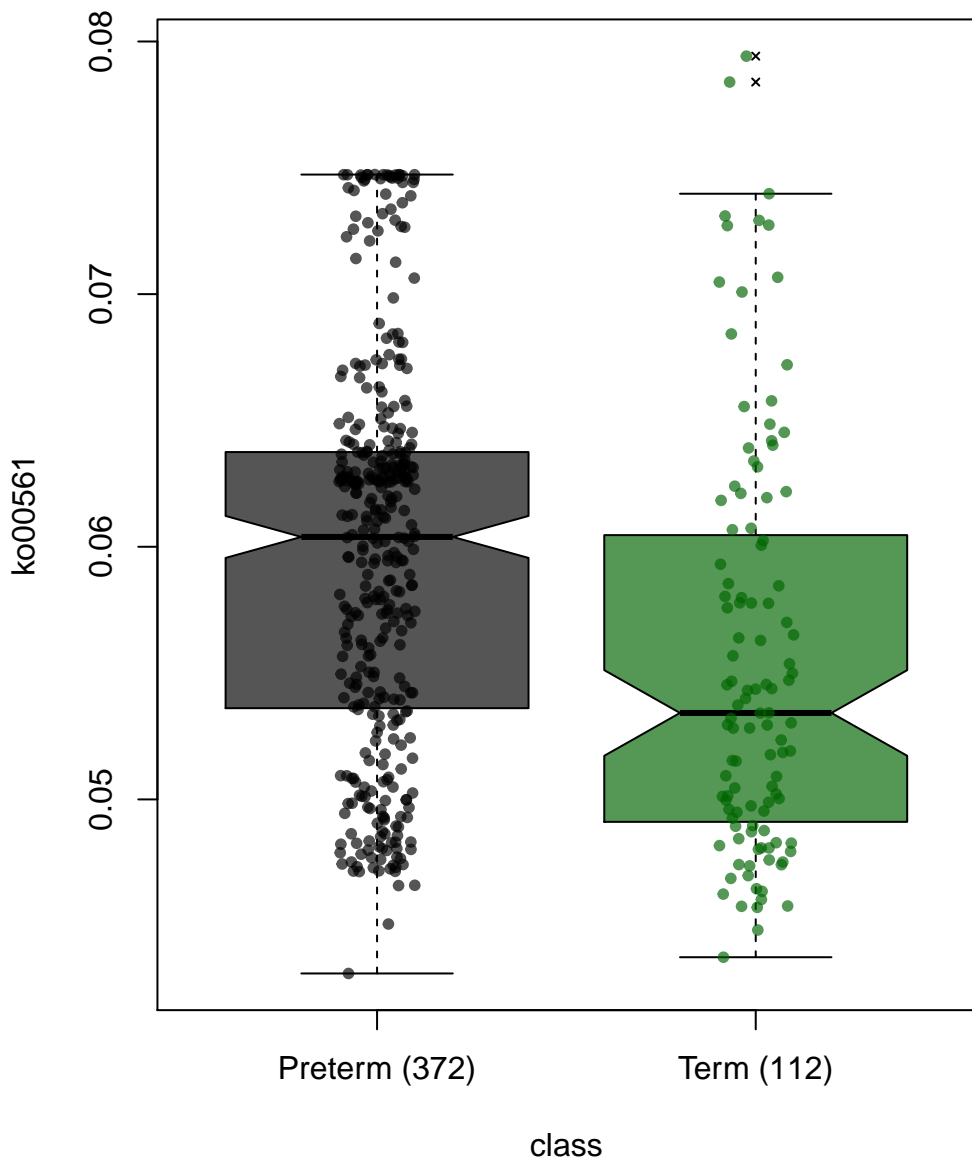

Partial Residual Plot

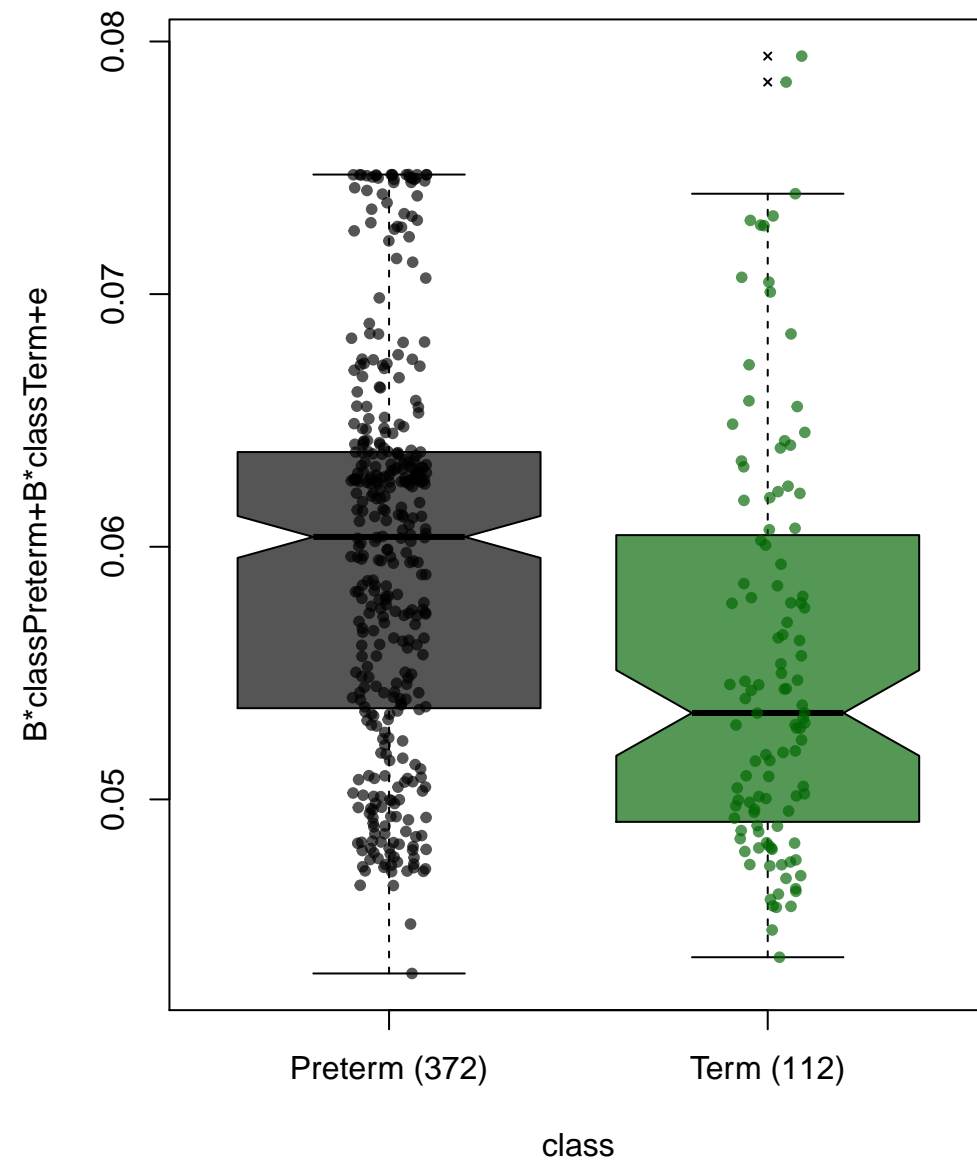

classTerm (0.00111 sd 0.000225, p=1.24e-06, q=2.43e-06)

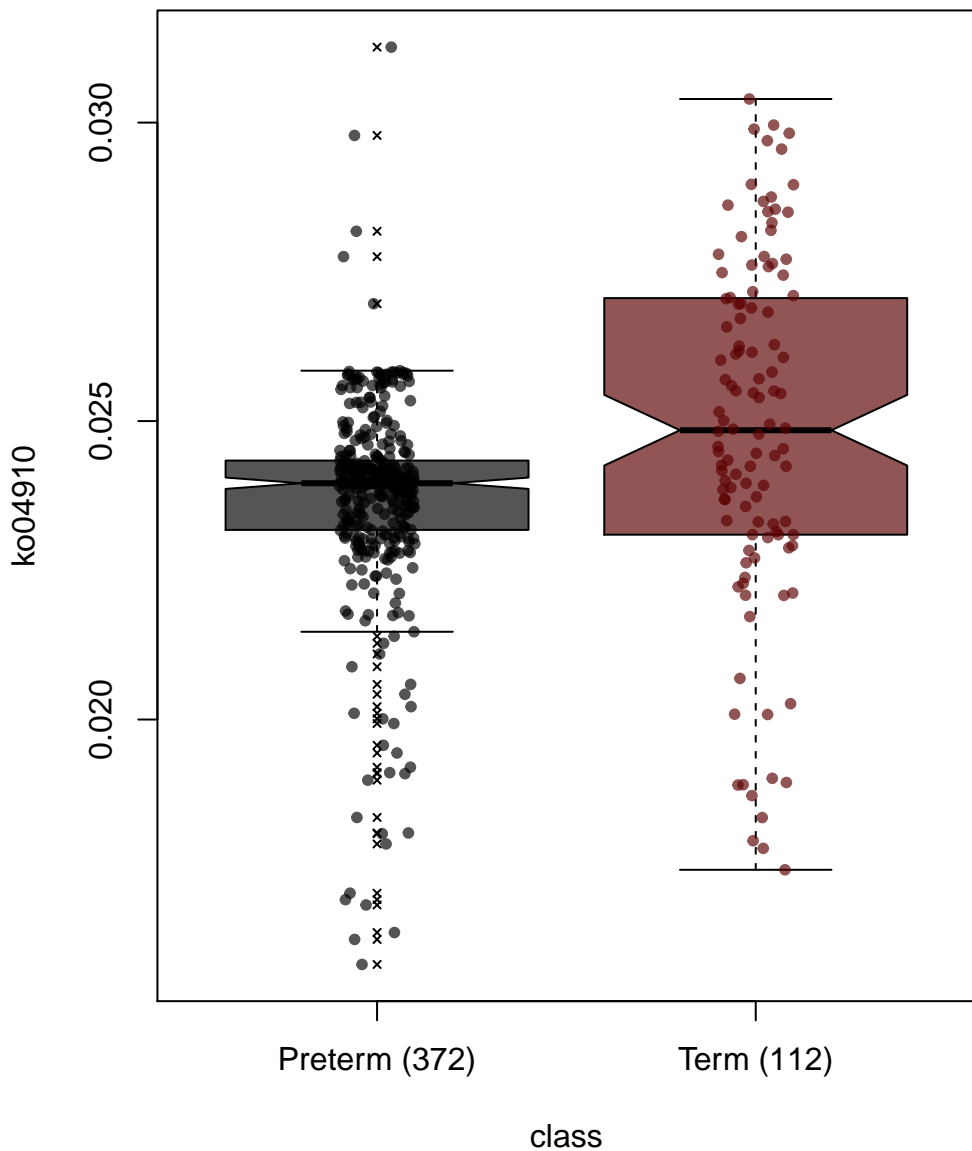

Partial Residual Plot

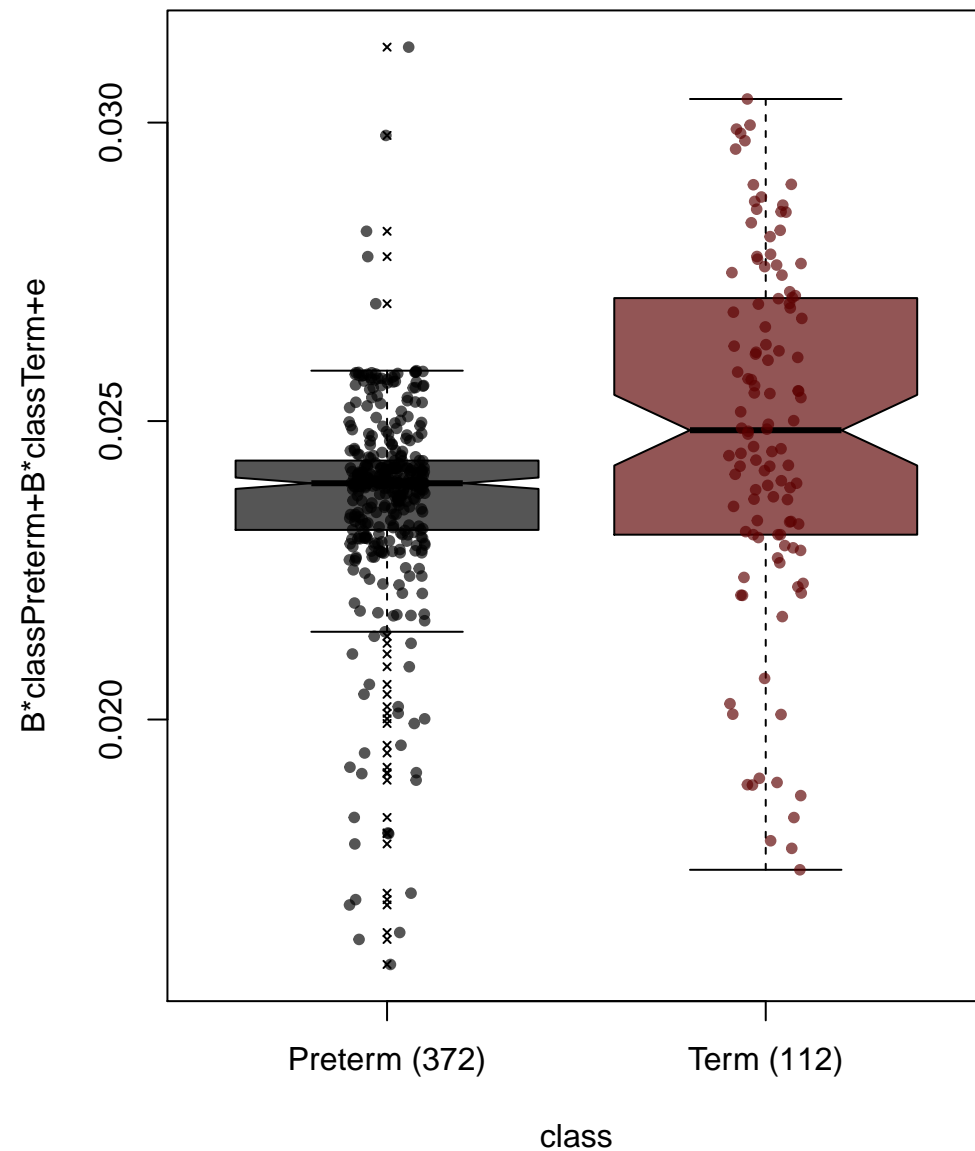

classTerm (-0.00251 sd 0.000514, p=1.39e-06, q=2.7e-06)

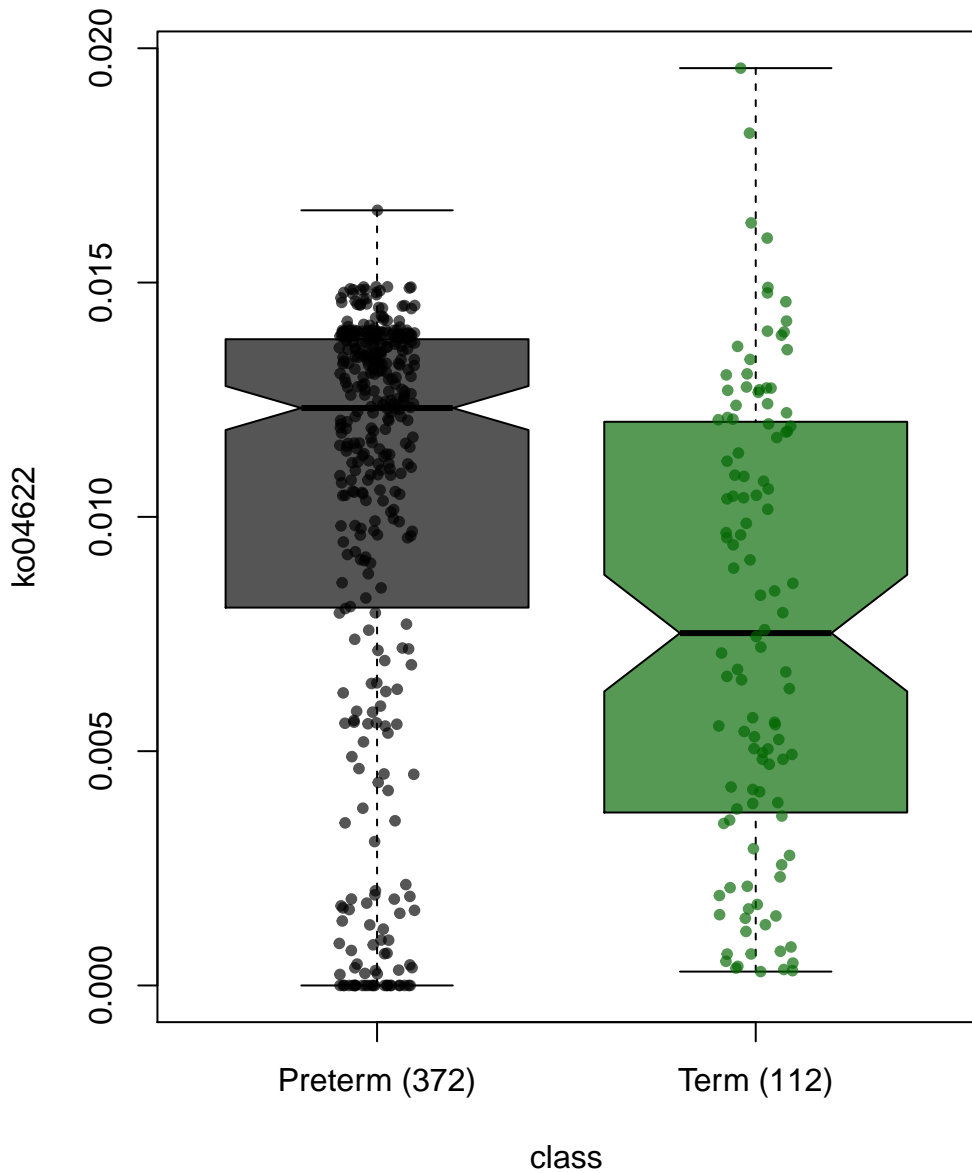

Partial Residual Plot

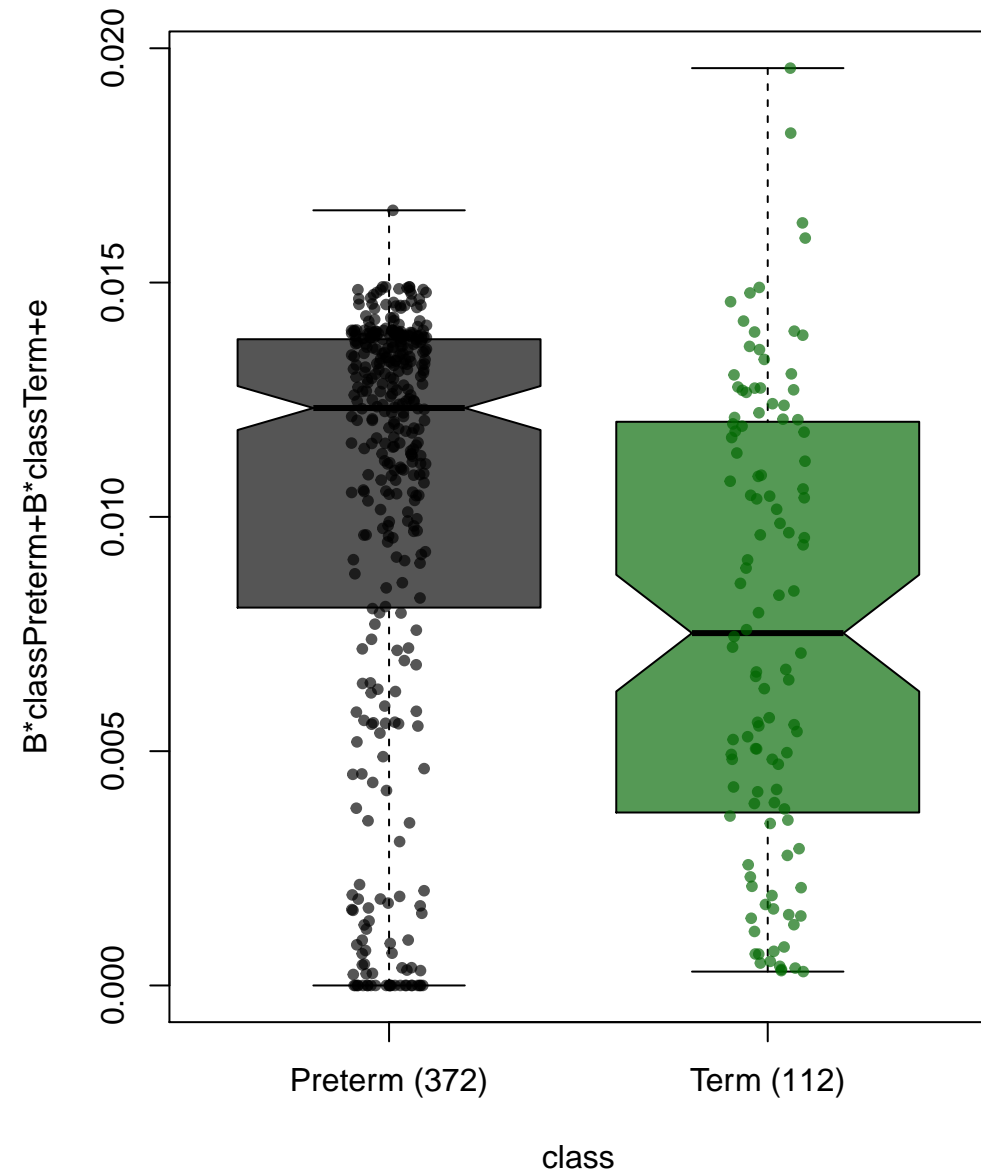

classTerm (-0.00479 sd 0.000984, p=1.54e-06, q=2.99e-06)

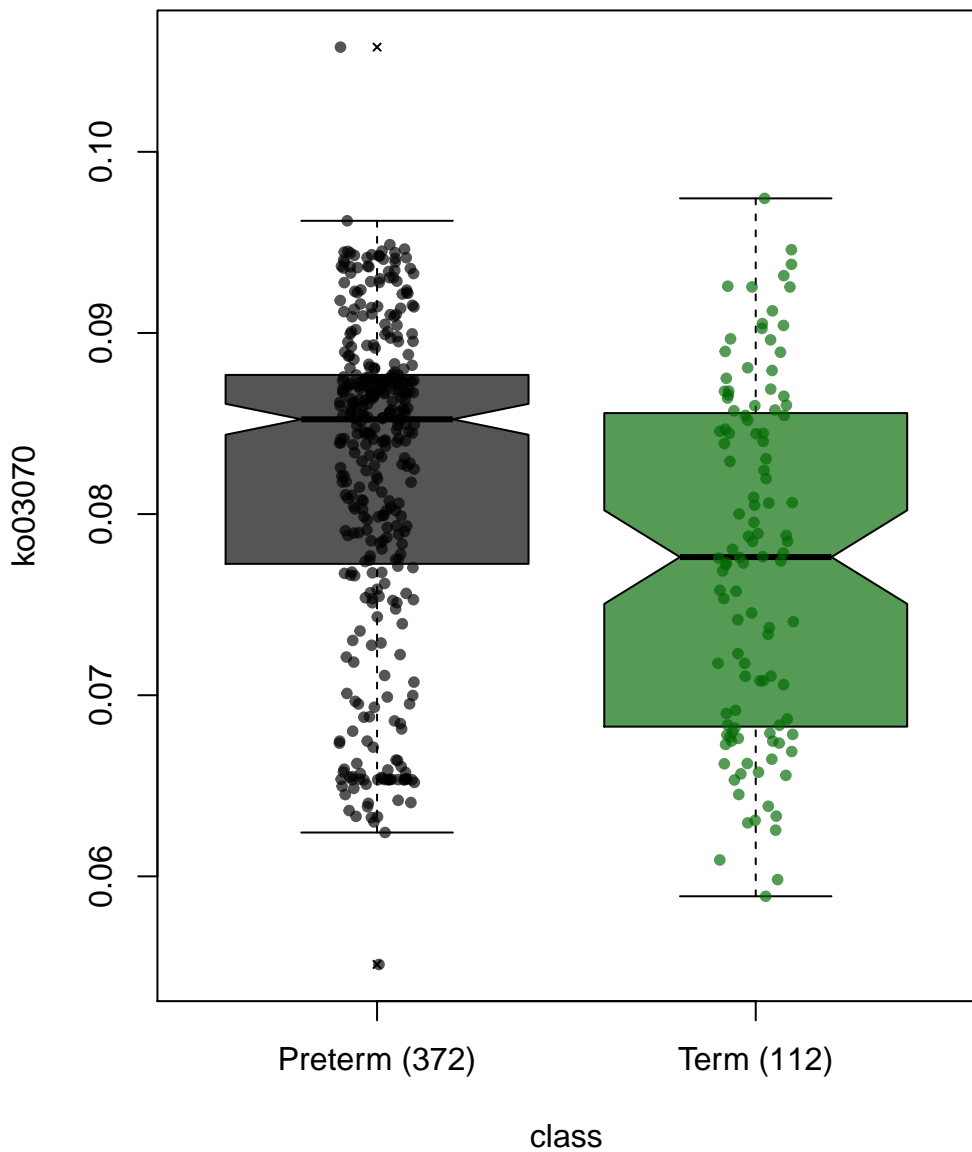

Partial Residual Plot

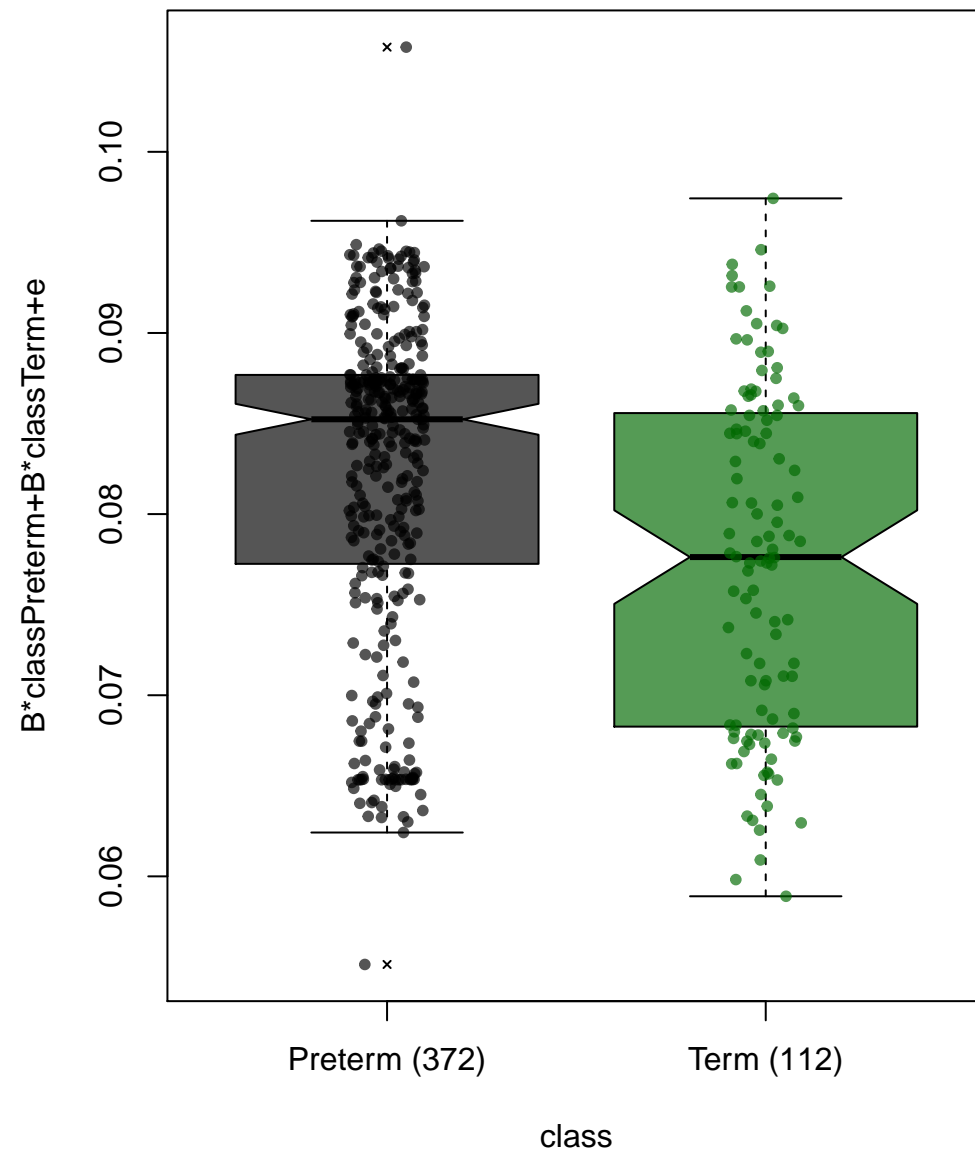

classTerm (0.00189 sd 0.000391, p=1.88e-06, q=3.61e-06)

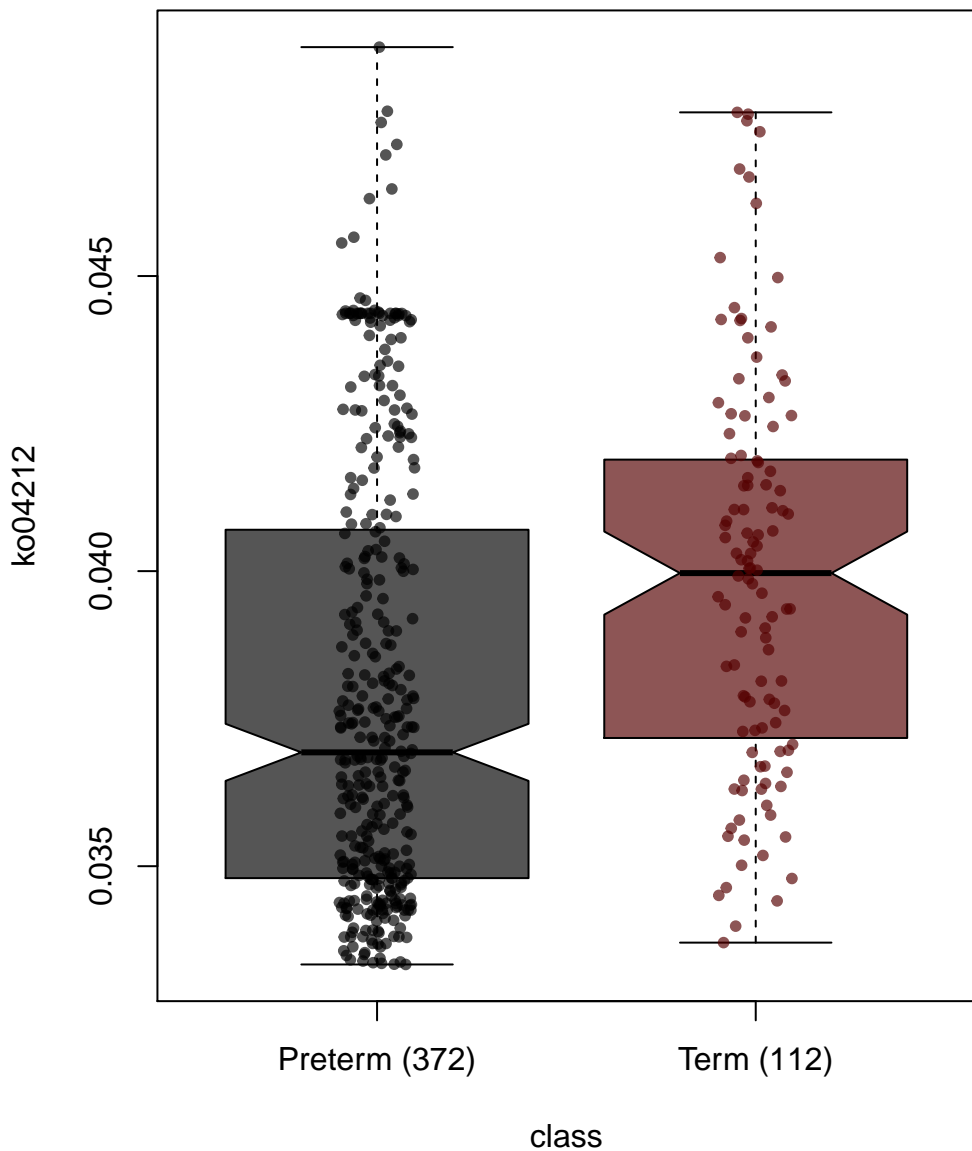

Partial Residual Plot

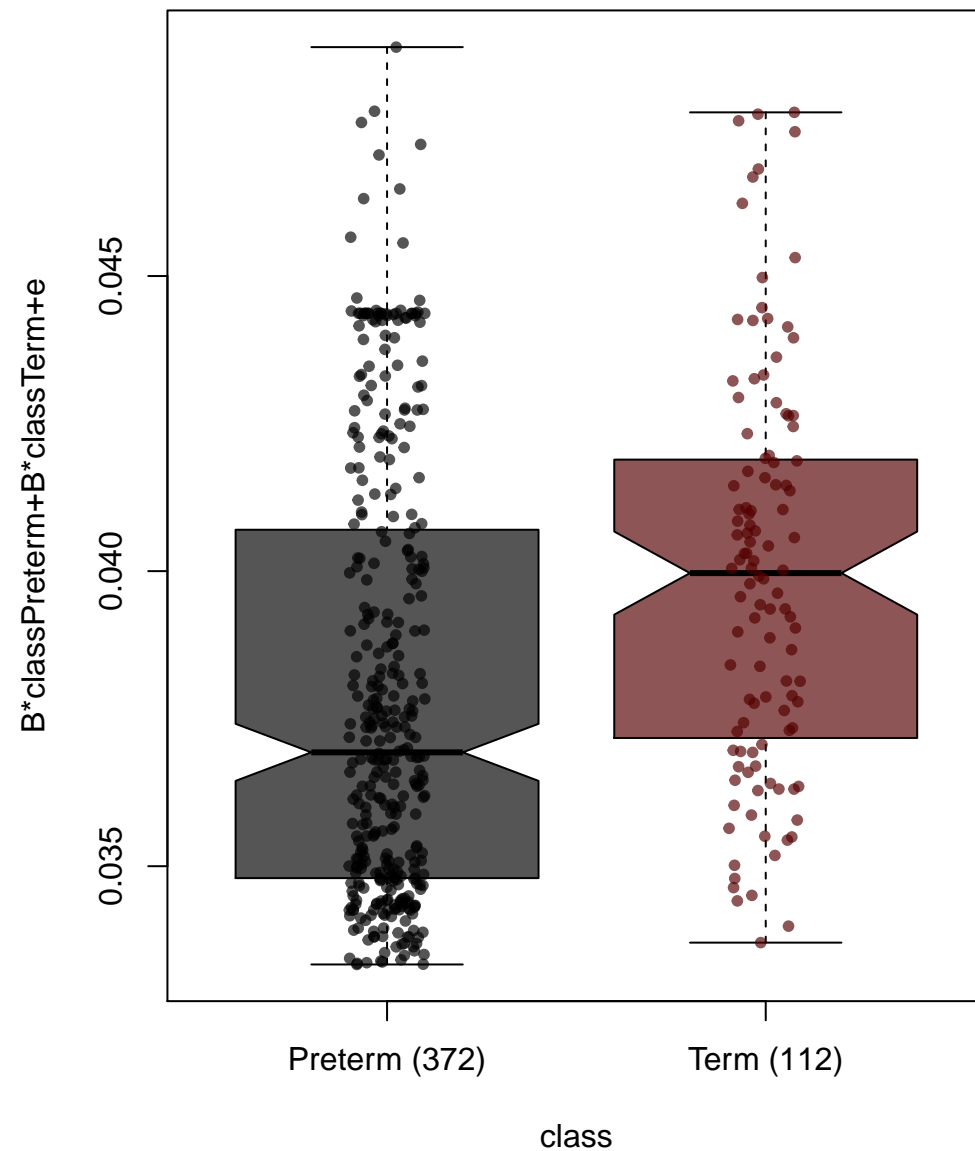

classTerm (-0.00243 sd 0.000504, p=1.96e-06, q=3.74e-06)

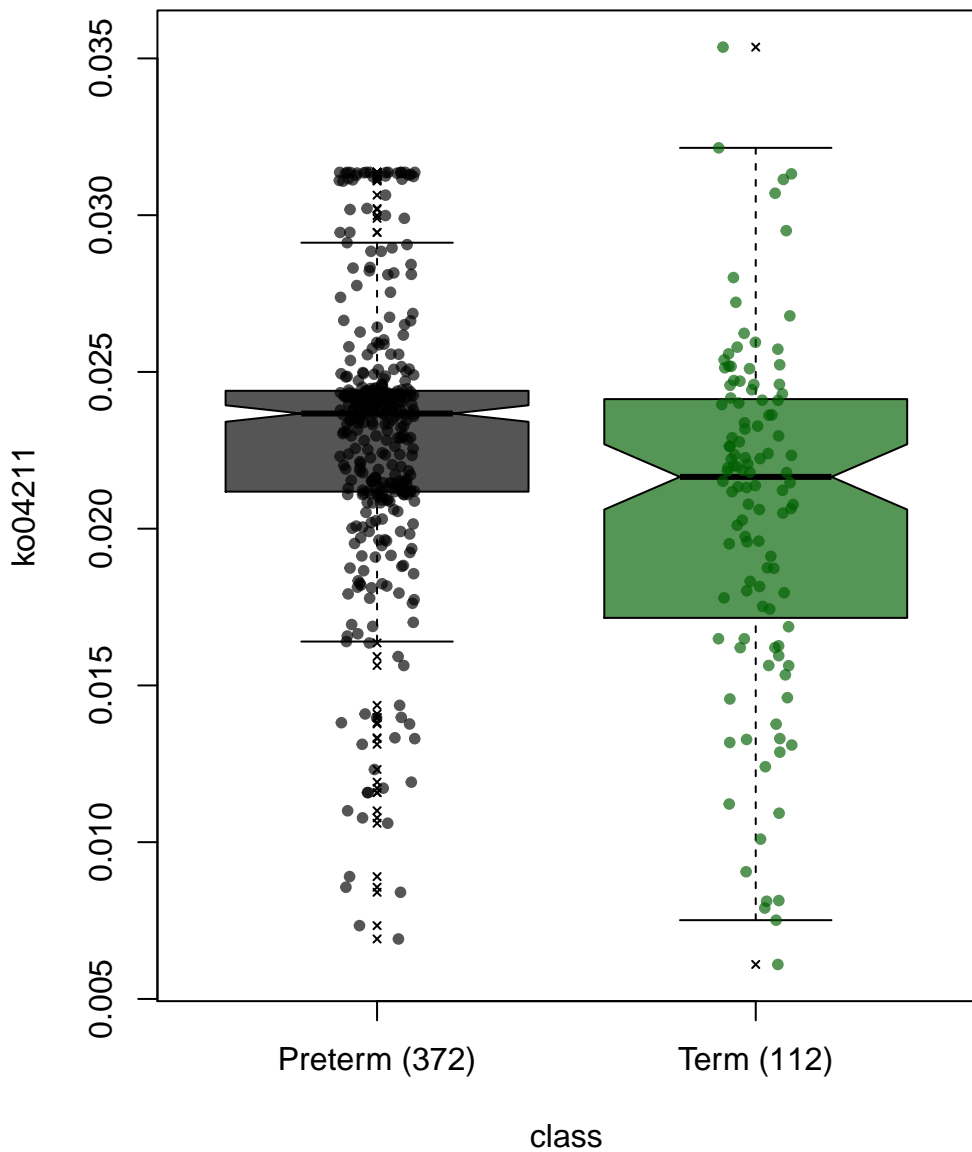

Partial Residual Plot

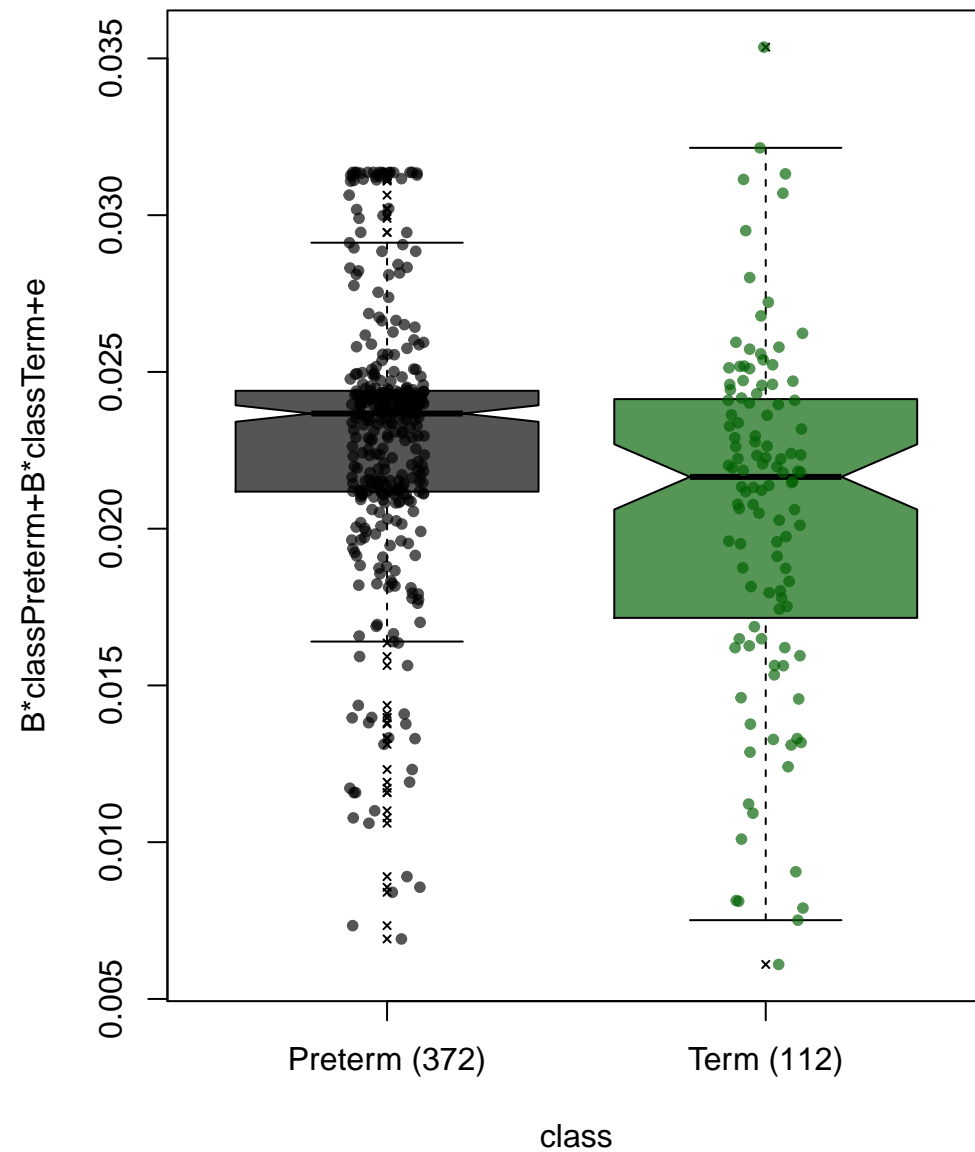

classTerm (0.00251 sd 0.000526, p=2.48e-06, q=4.71e-06)

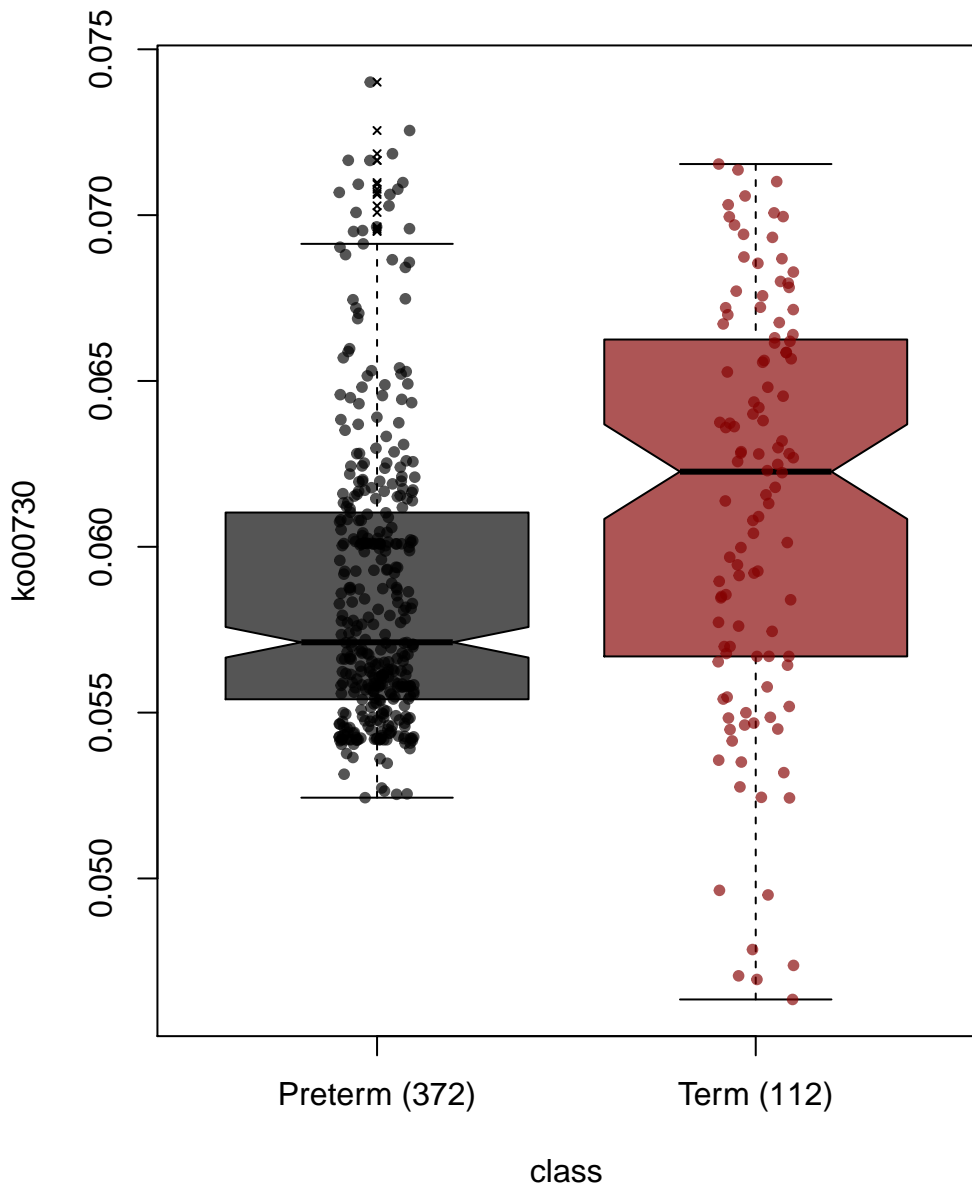

Partial Residual Plot

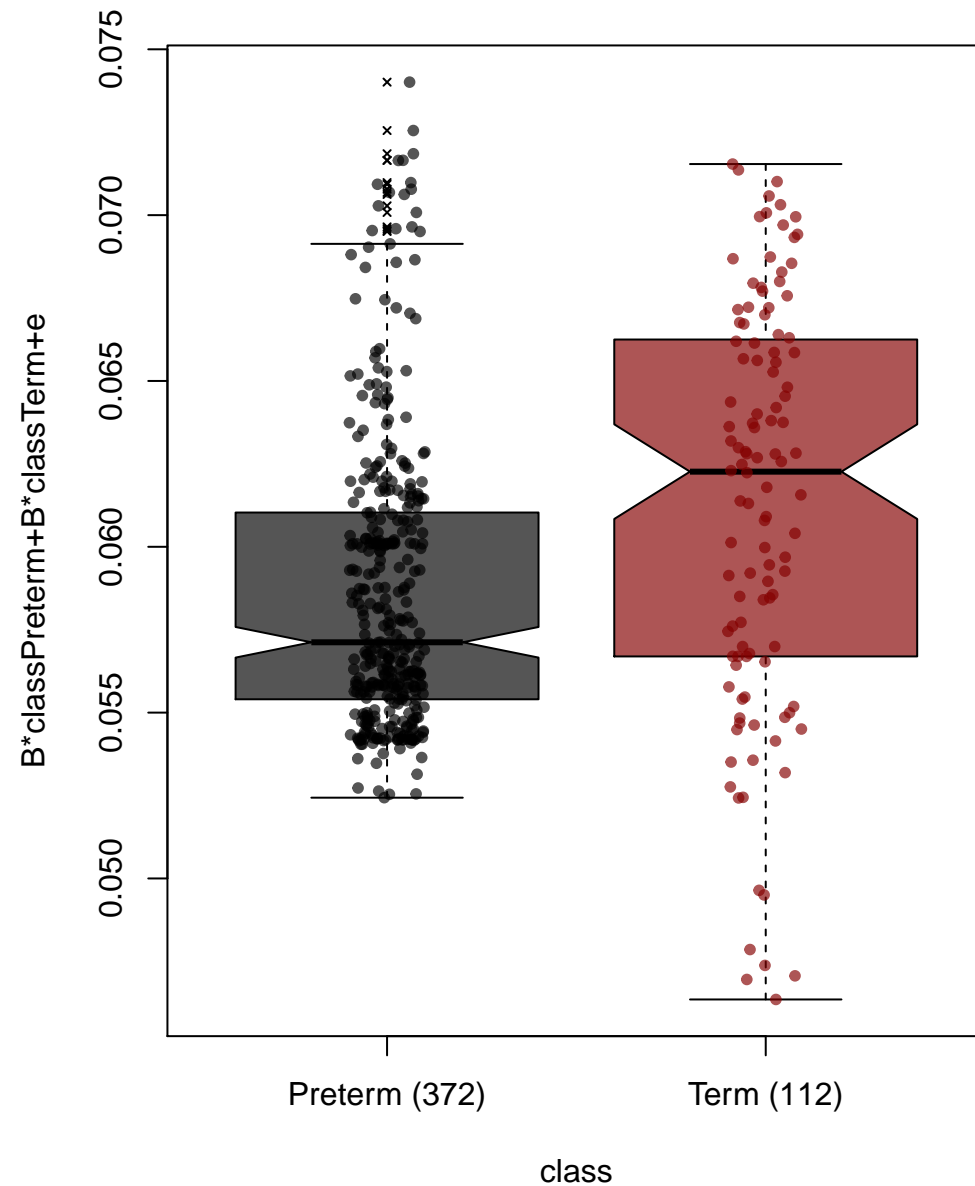



classTerm (0.00366 sd 0.000771, p=2.71e-06, q=5.11e-06)

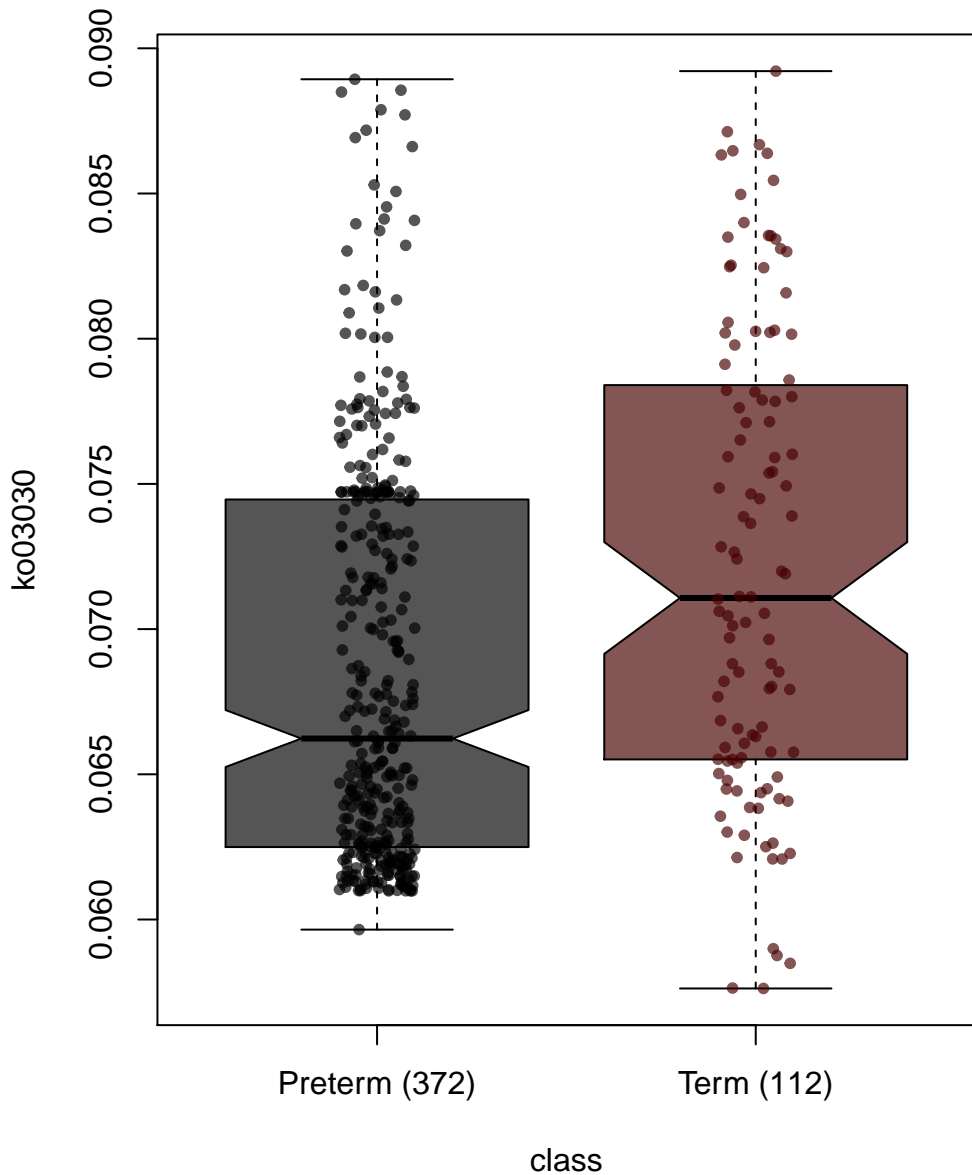

Partial Residual Plot

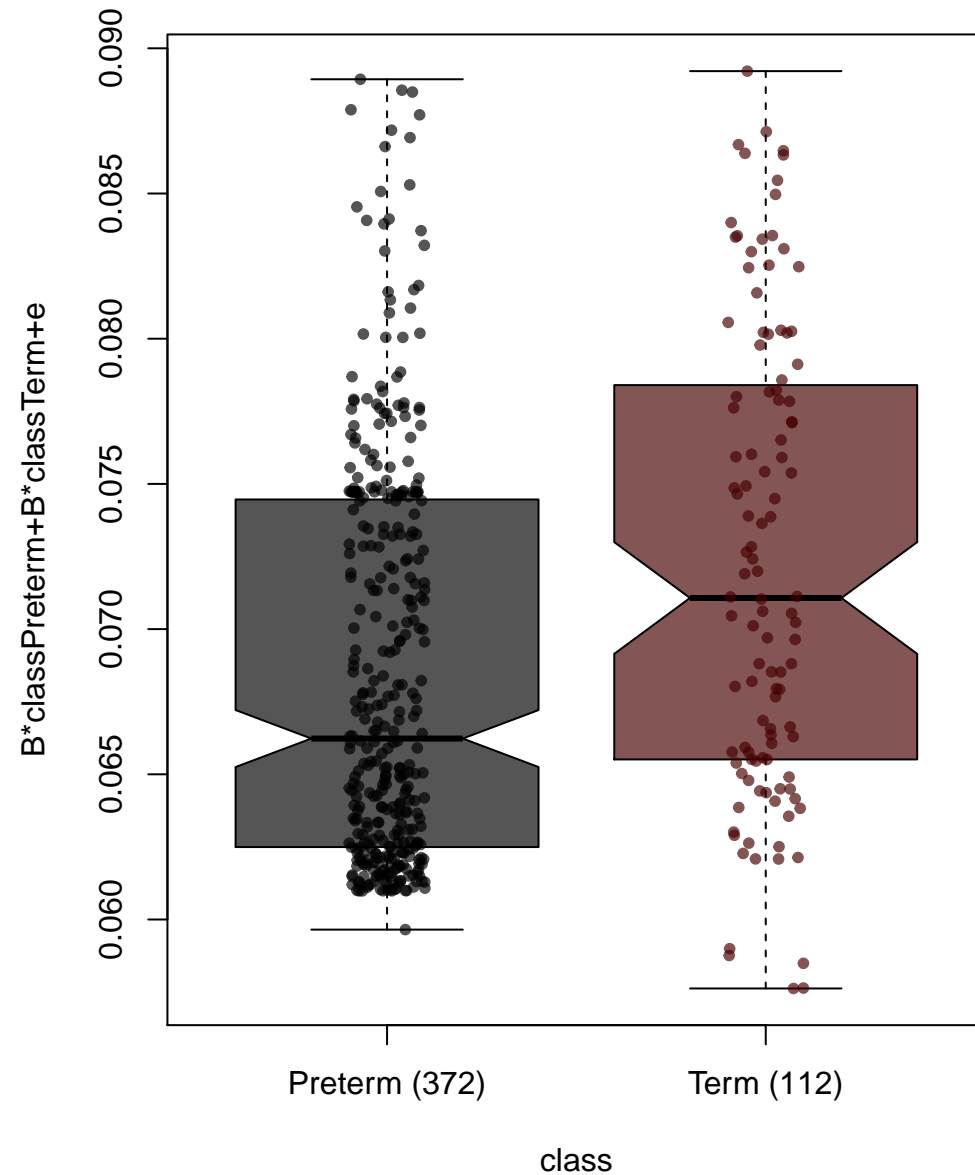

classTerm (-0.00178 sd 0.000377, p=3.21e-06, q=6.02e-06)

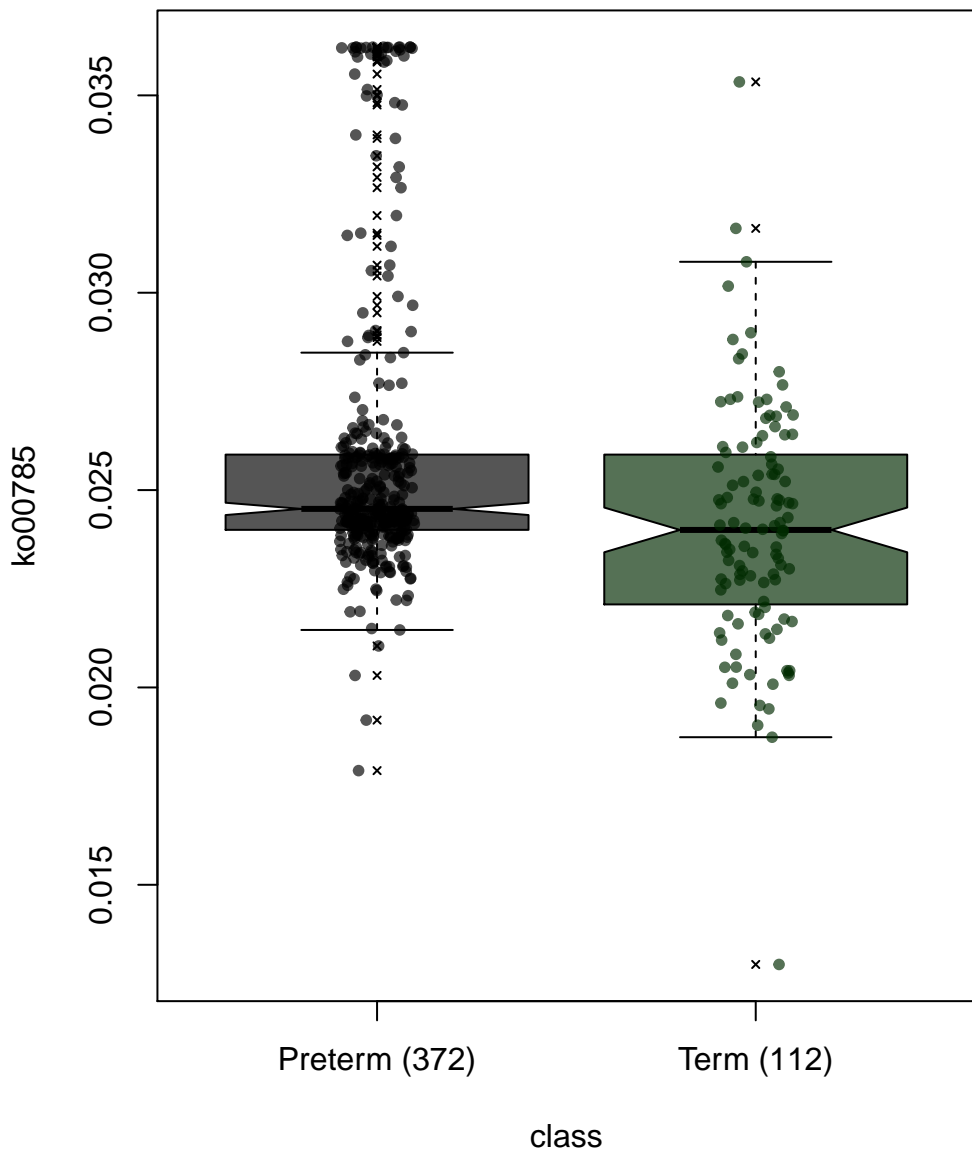

Partial Residual Plot

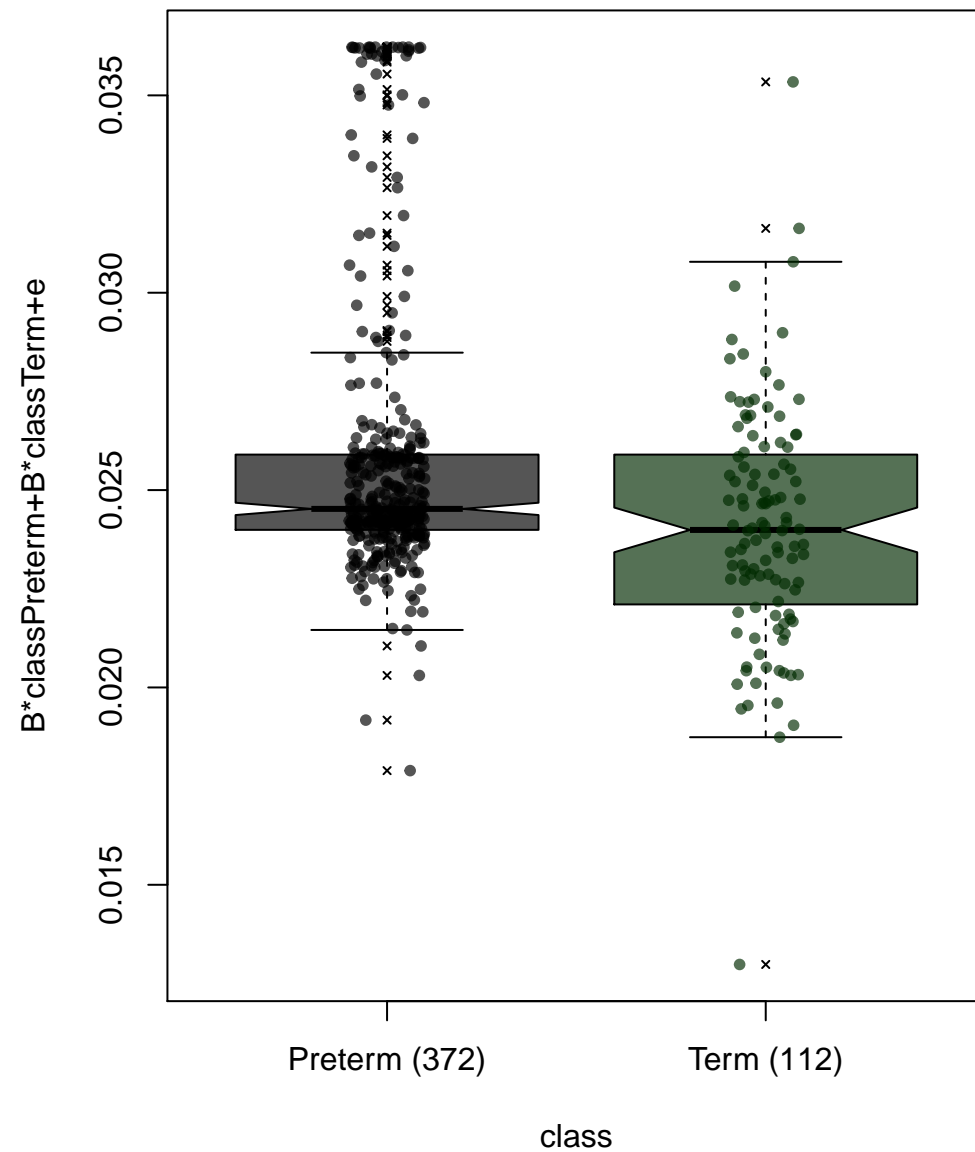

classTerm (0.00527 sd 0.00113, p=3.91e-06, q=7.27e-06)

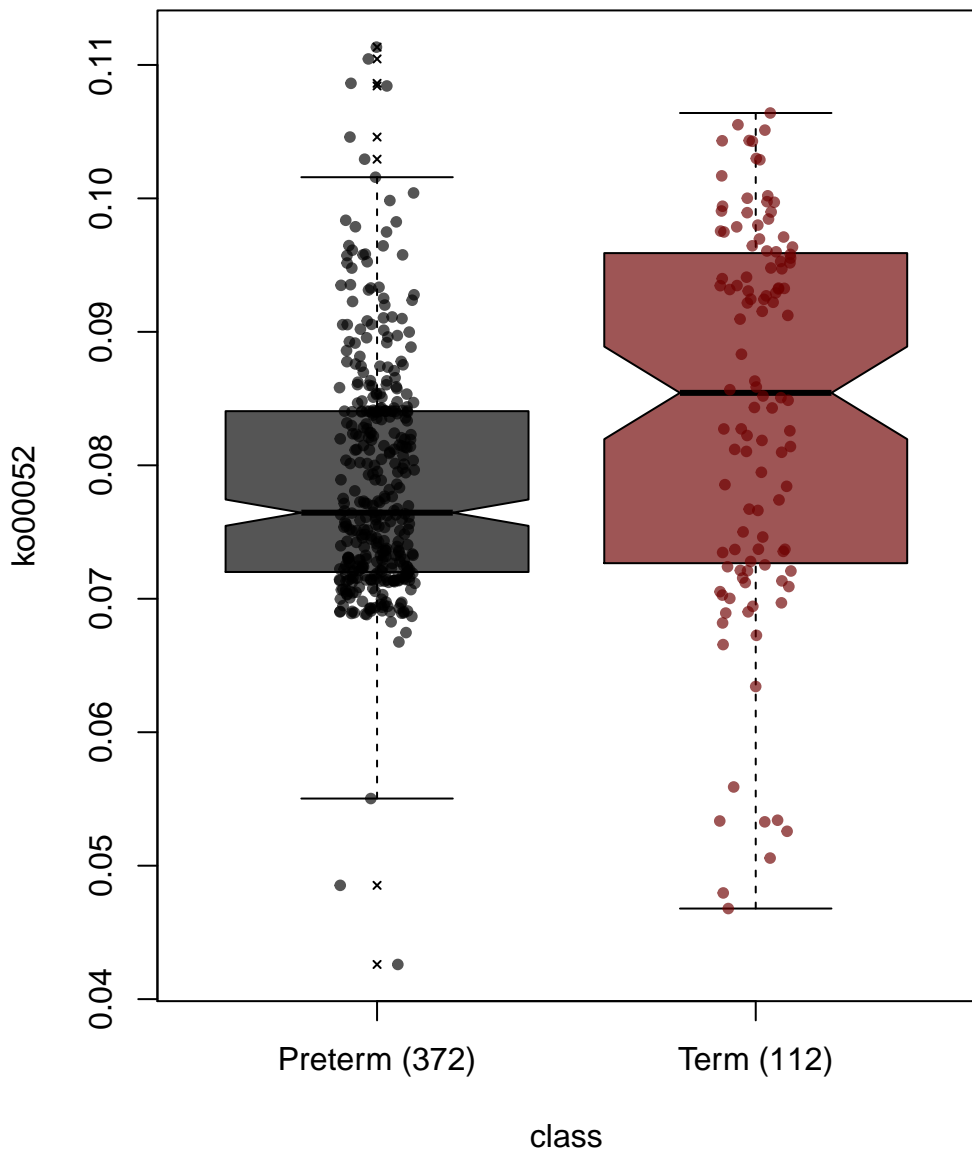

Partial Residual Plot

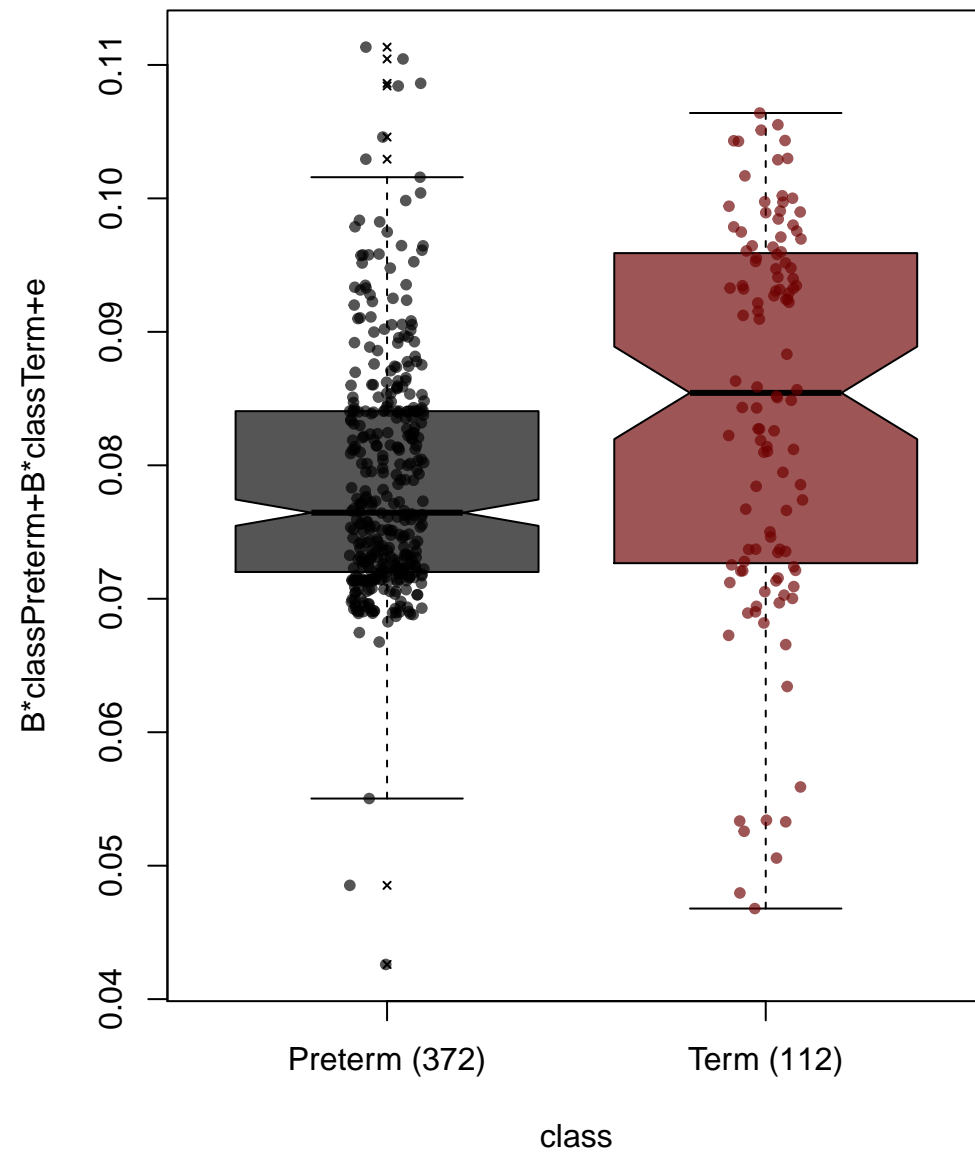

classTerm (−0.00237 sd 0.000507, p=3.98e−06, q=7.36e−06)

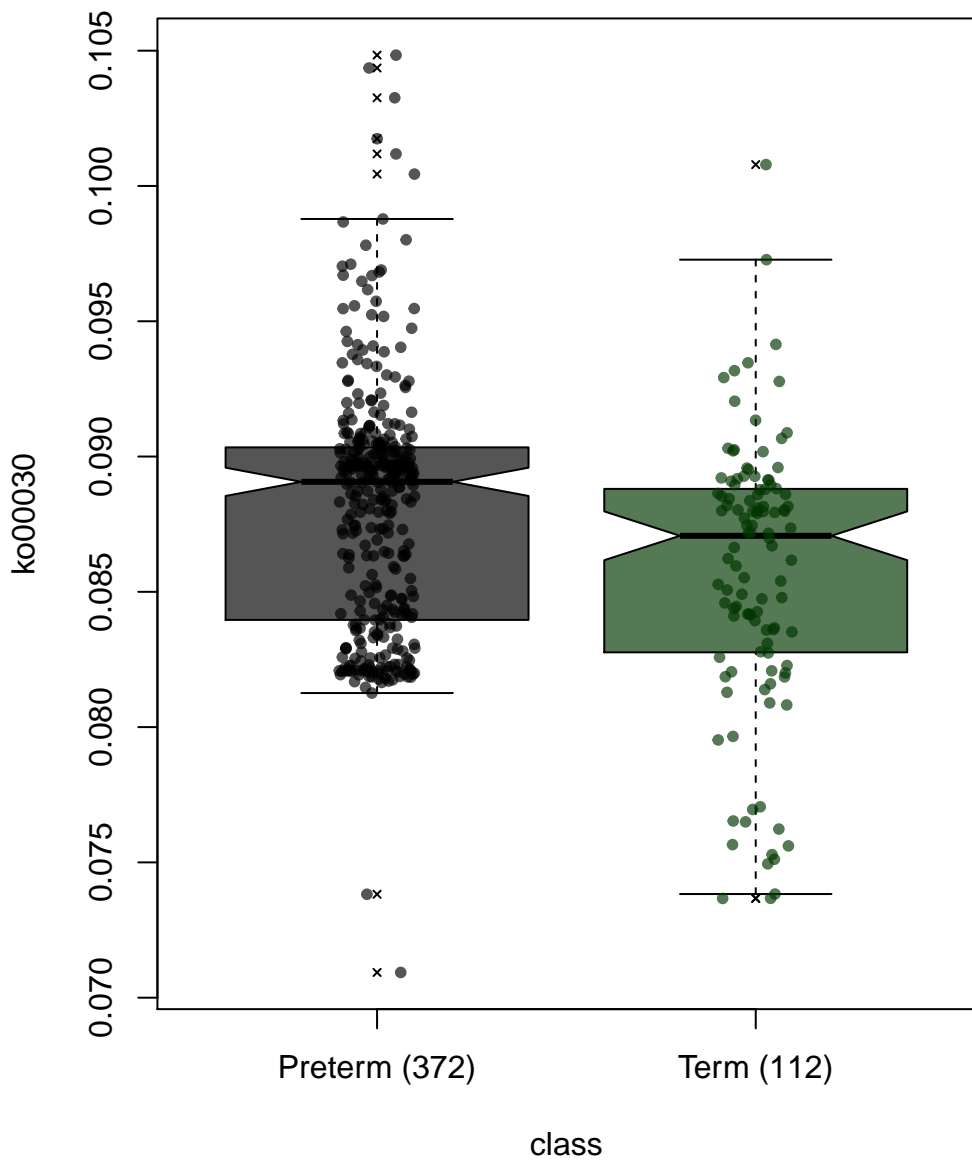

Partial Residual Plot

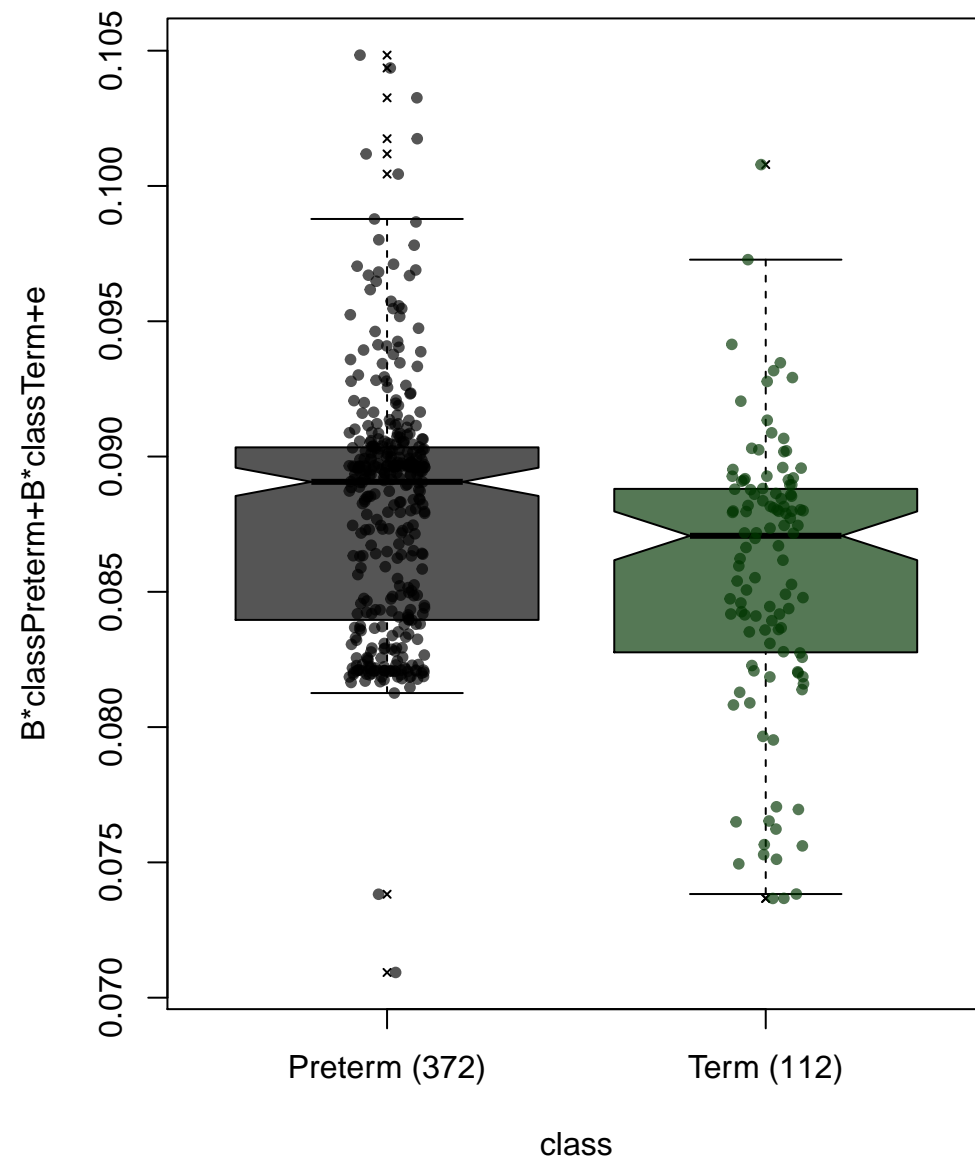

classTerm (−0.00196 sd 0.000421, p=4.24e−06, q=7.79e−06)

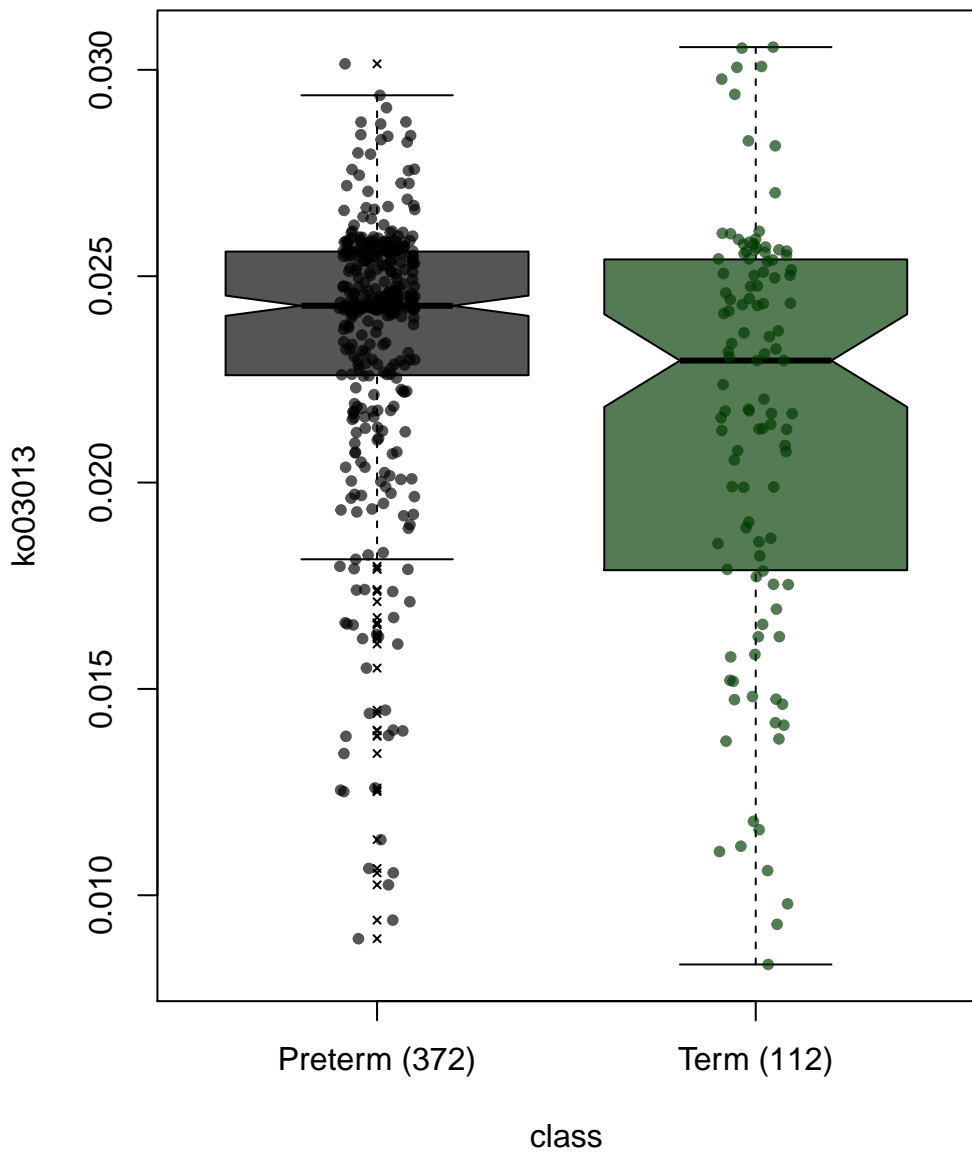

Partial Residual Plot

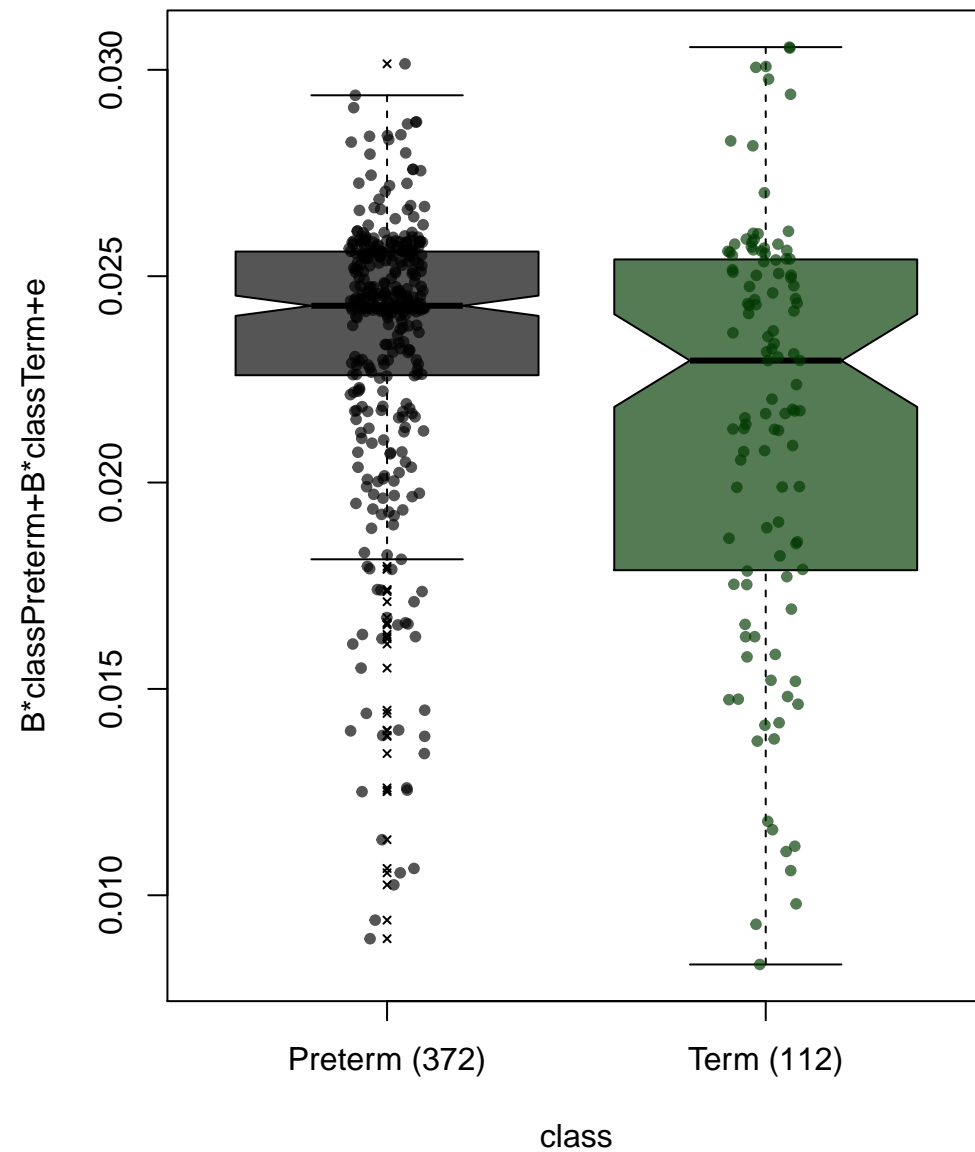

classTerm (-0.00213 sd 0.000459, p=4.27e-06, q=7.79e-06)

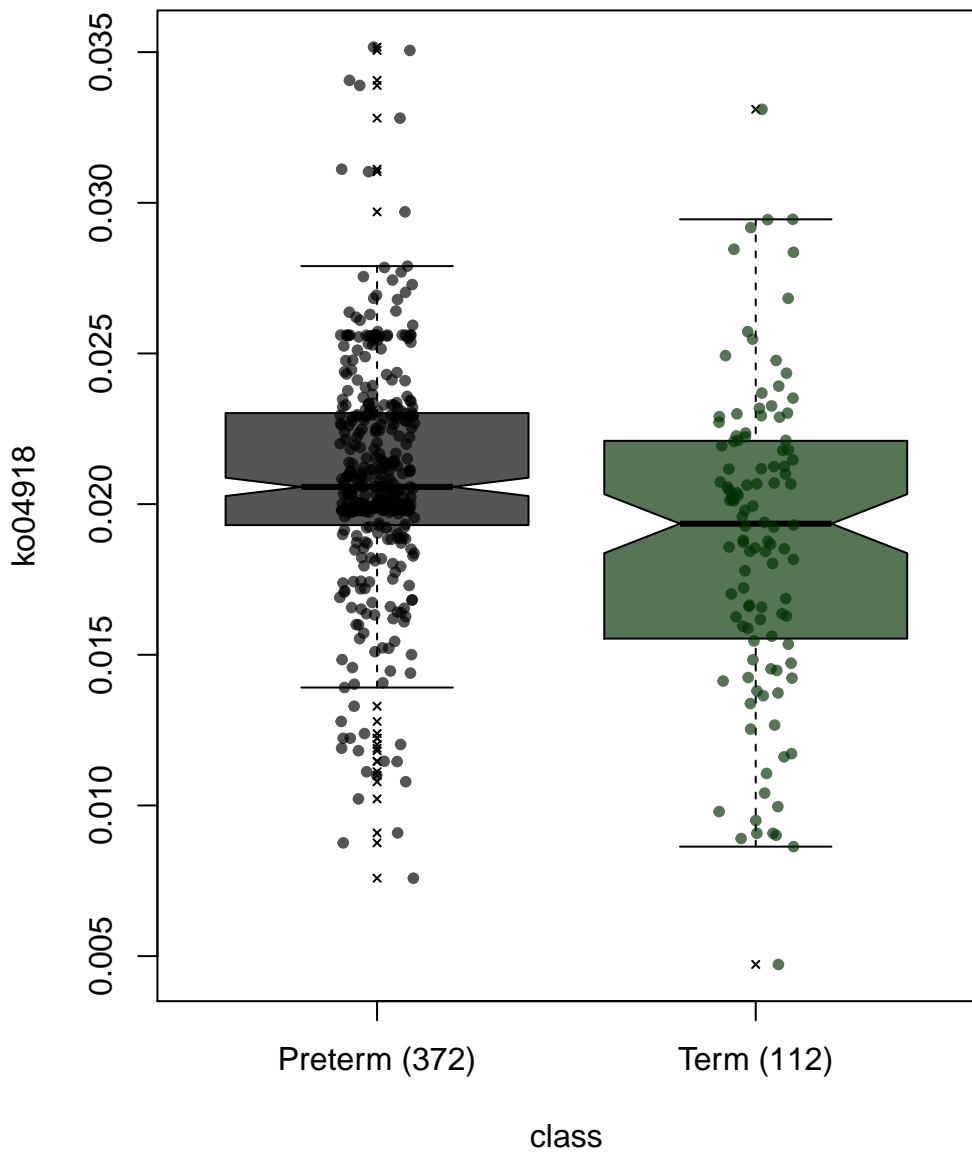

Partial Residual Plot

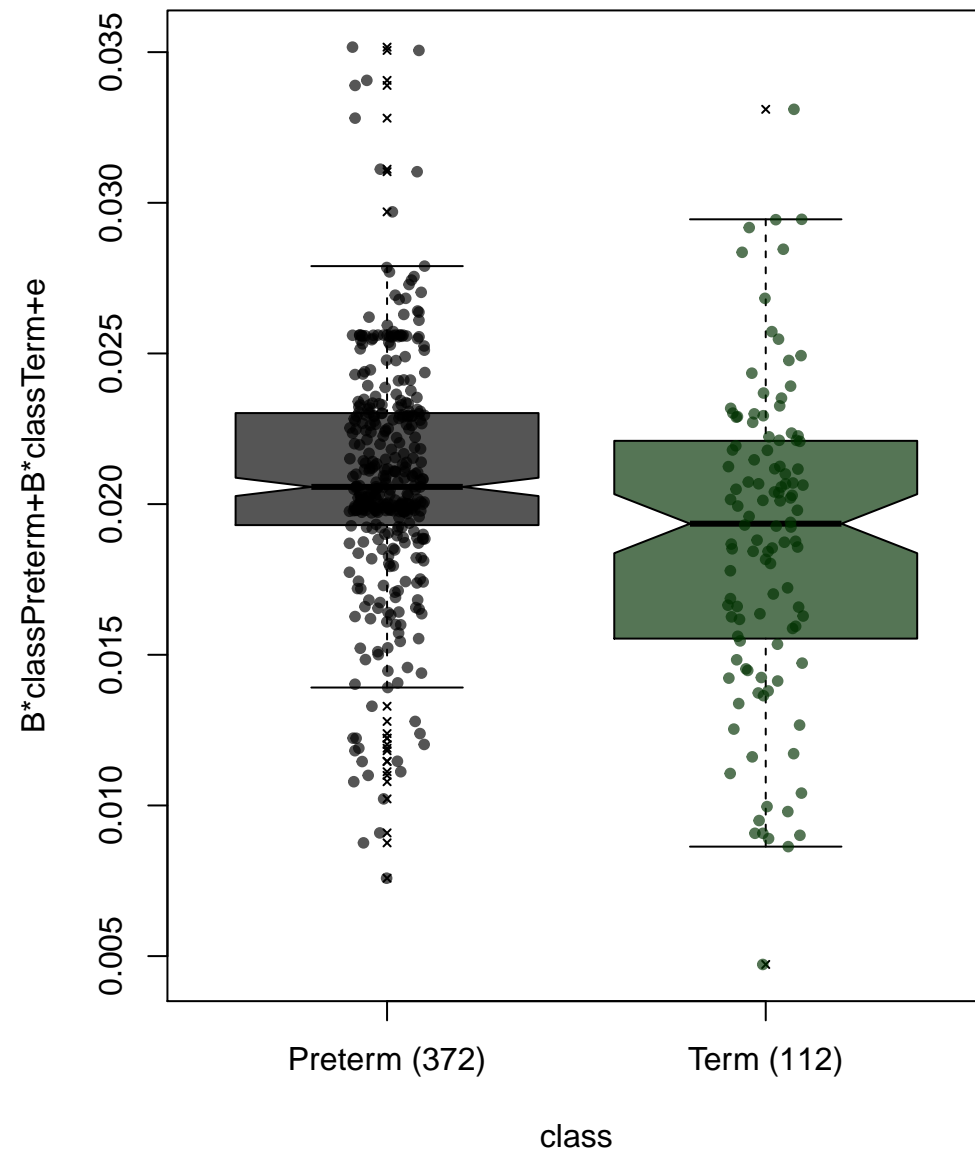

classTerm (−0.00235 sd 0.000509, p=4.72e−06, q=8.56e−06)

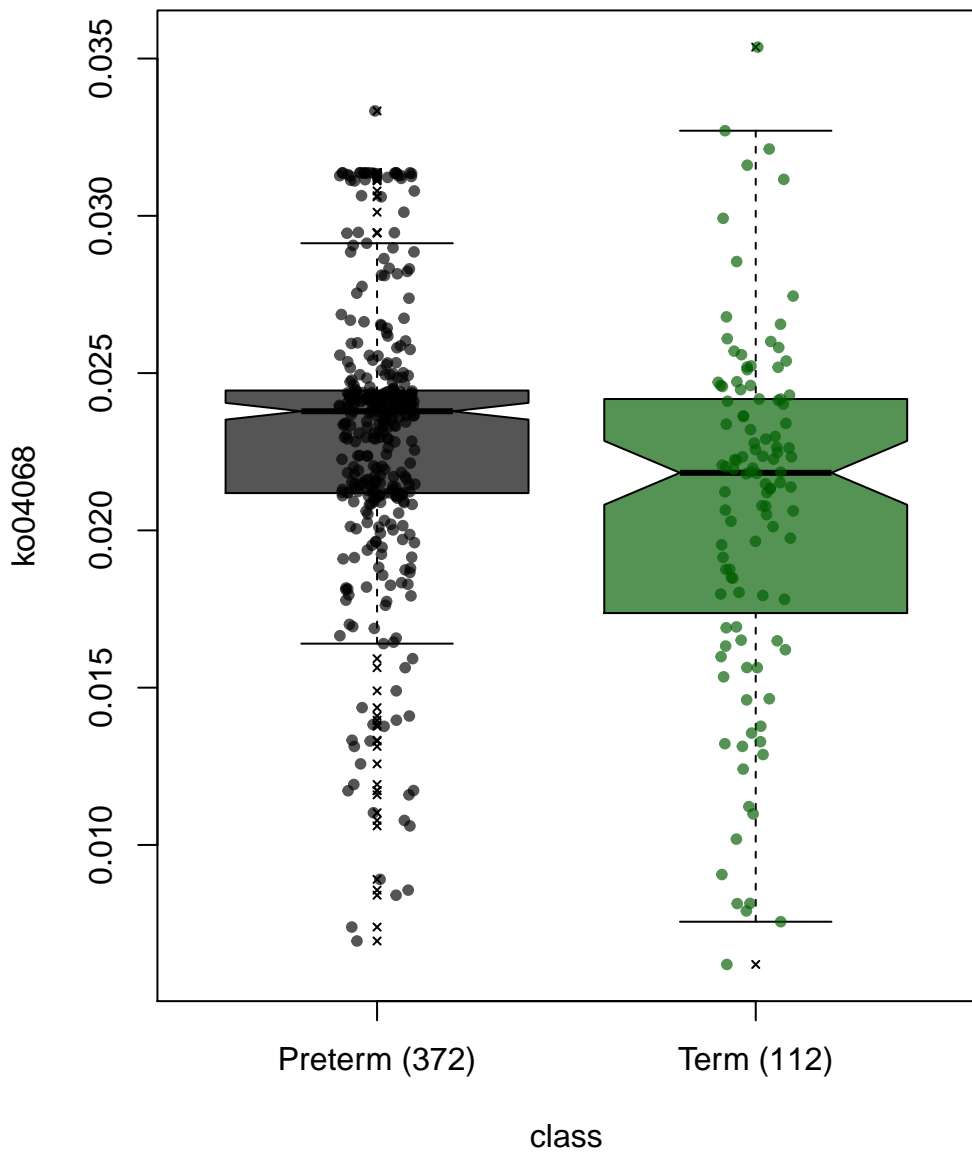

Partial Residual Plot

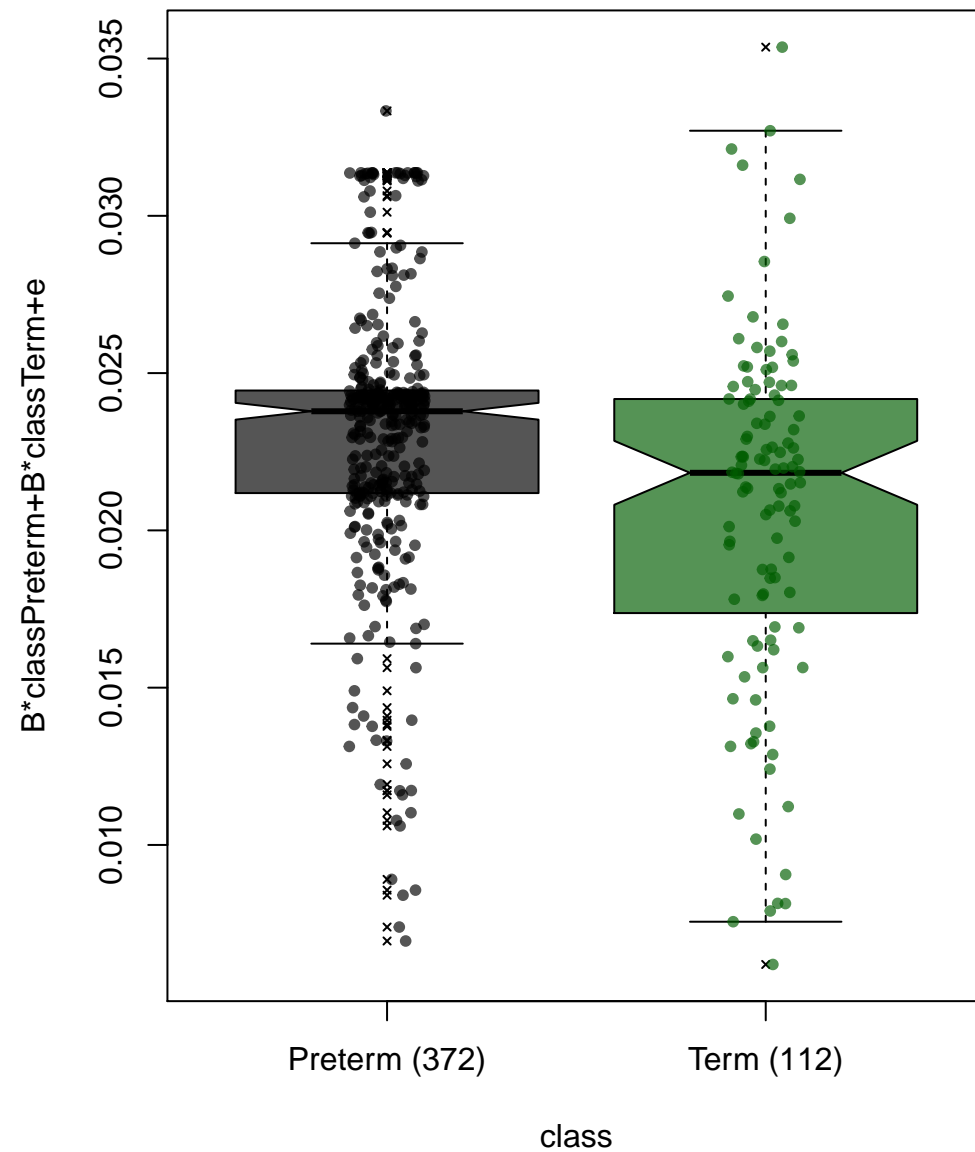

classTerm (0.00457 sd 0.000987, p=4.77e-06, q=8.59e-06)

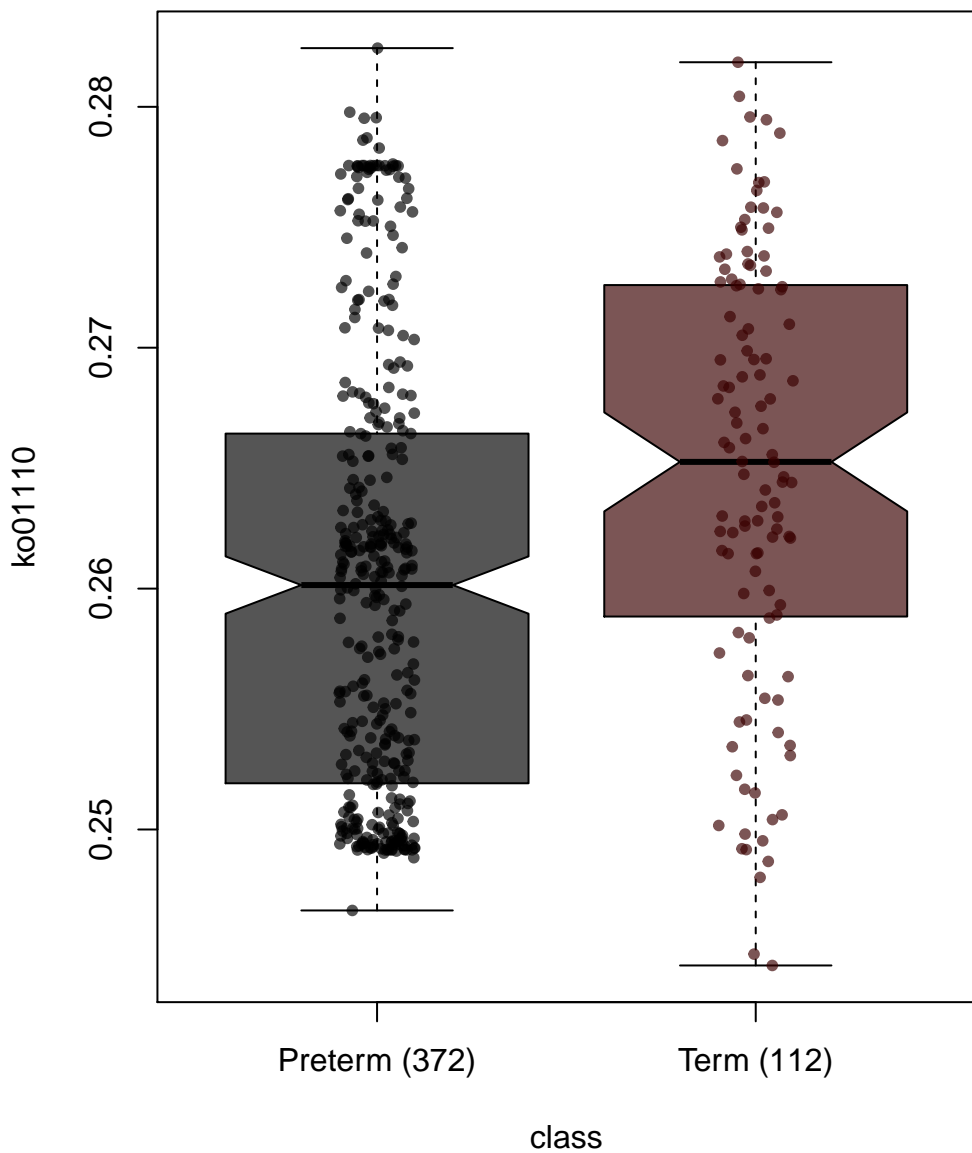

Partial Residual Plot

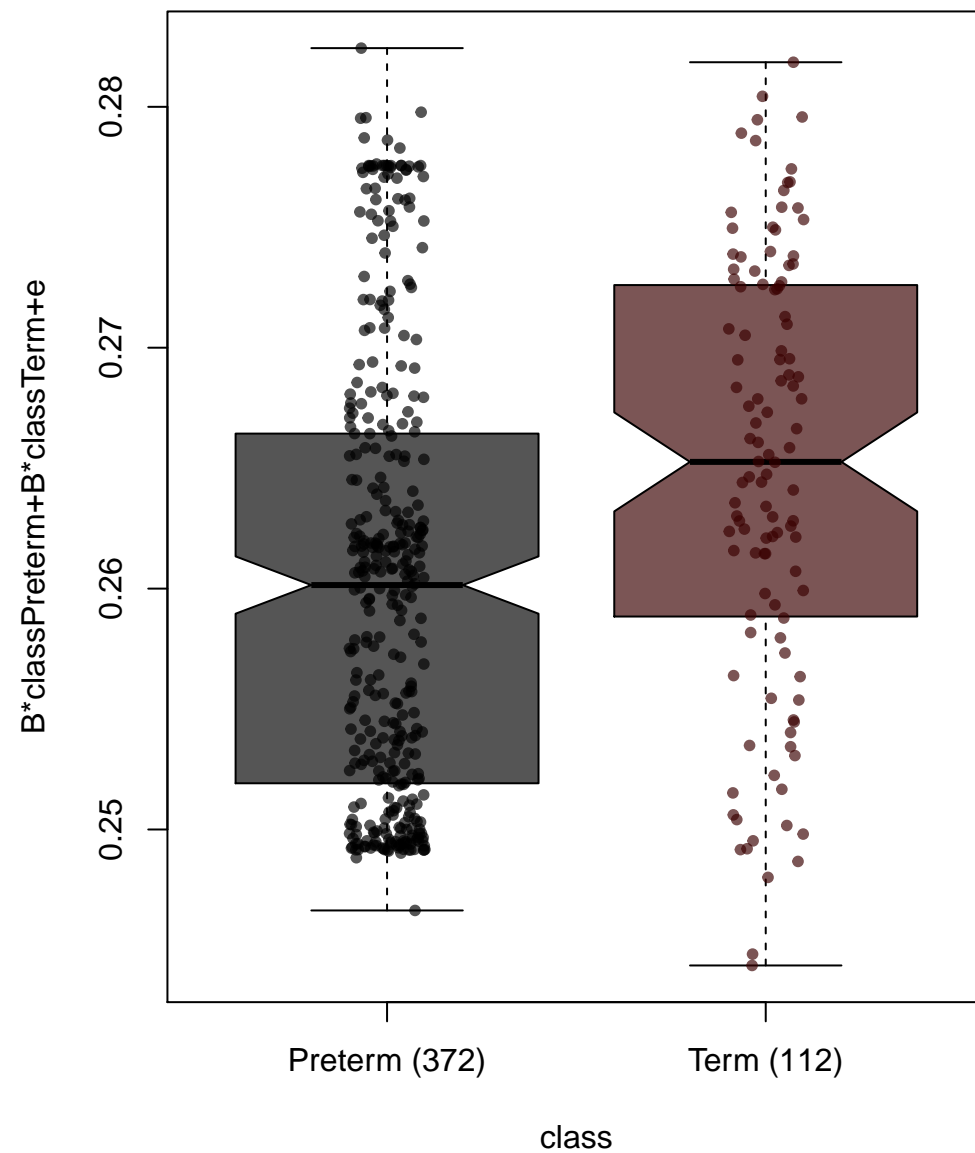



classTerm (-0.00574 sd 0.00124, p=4.98e-06, q=8.91e-06)

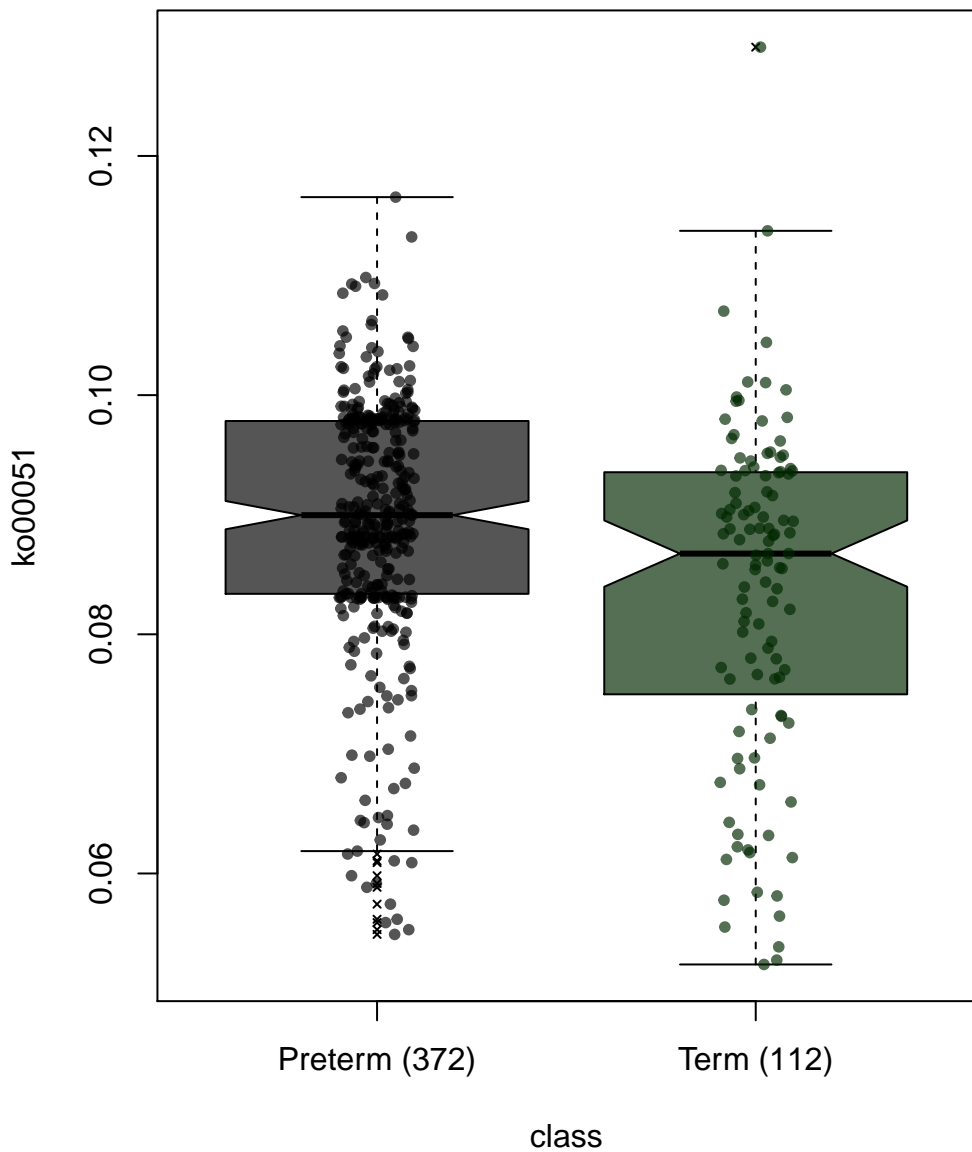

Partial Residual Plot

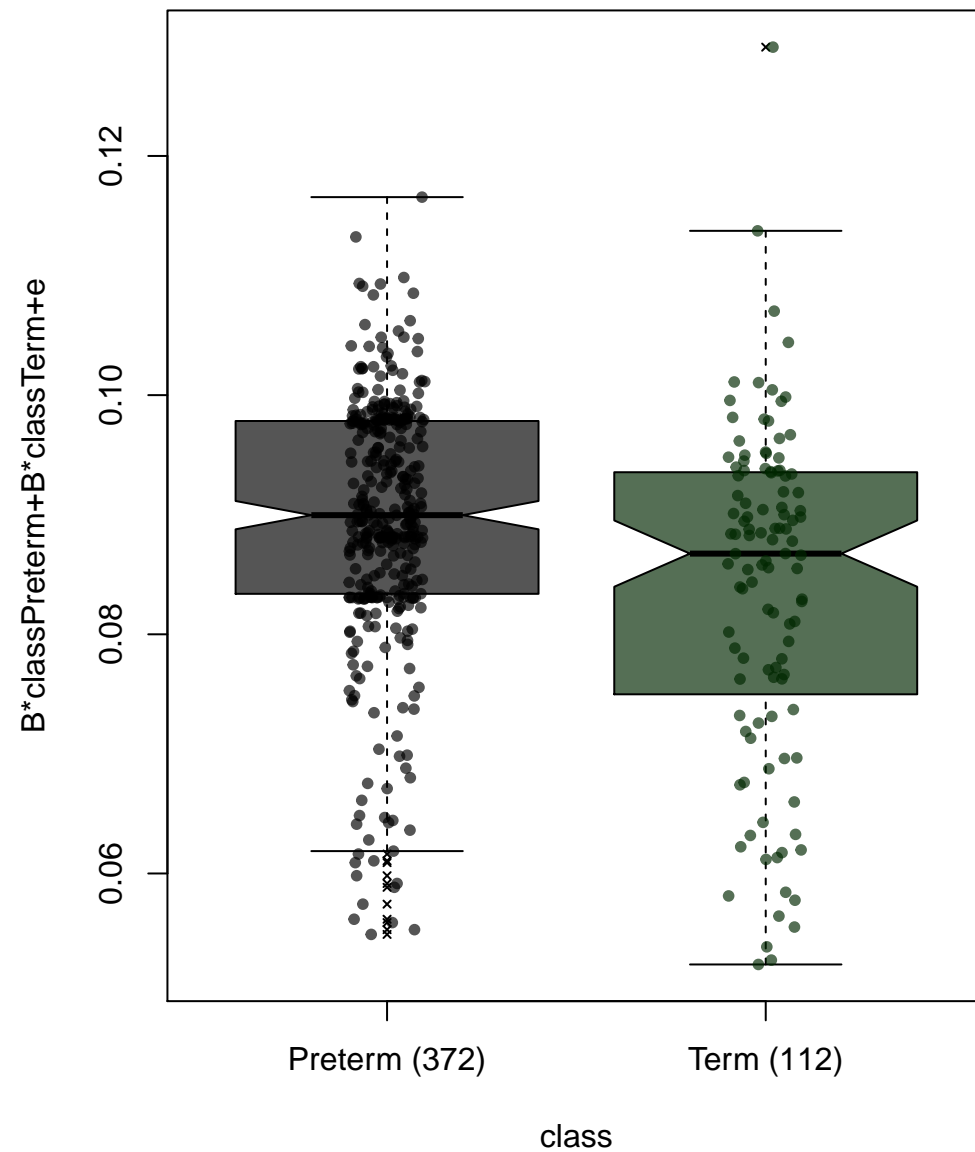

classTerm (-0.00377 sd 0.000824, p=6.02e-06, q=1.07e-05)

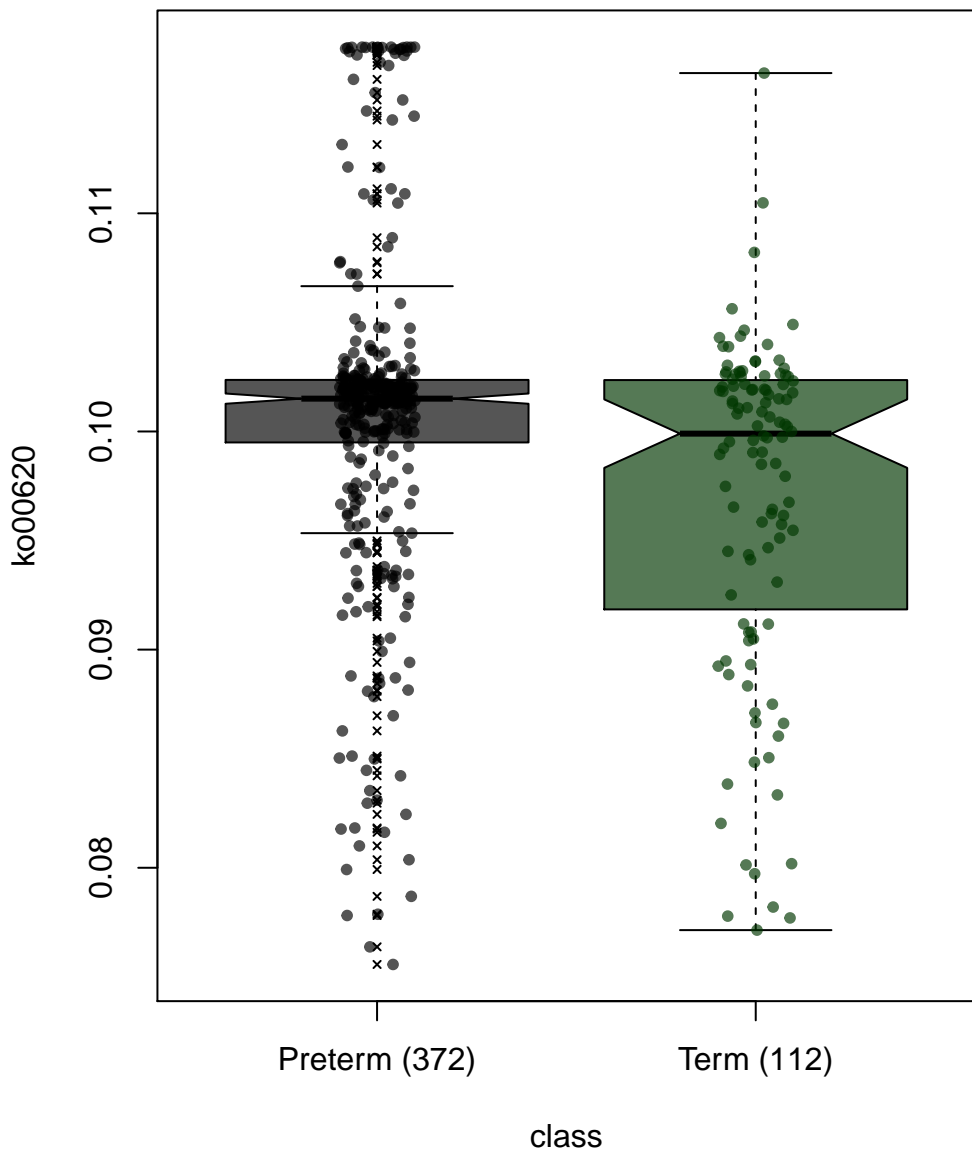

Partial Residual Plot

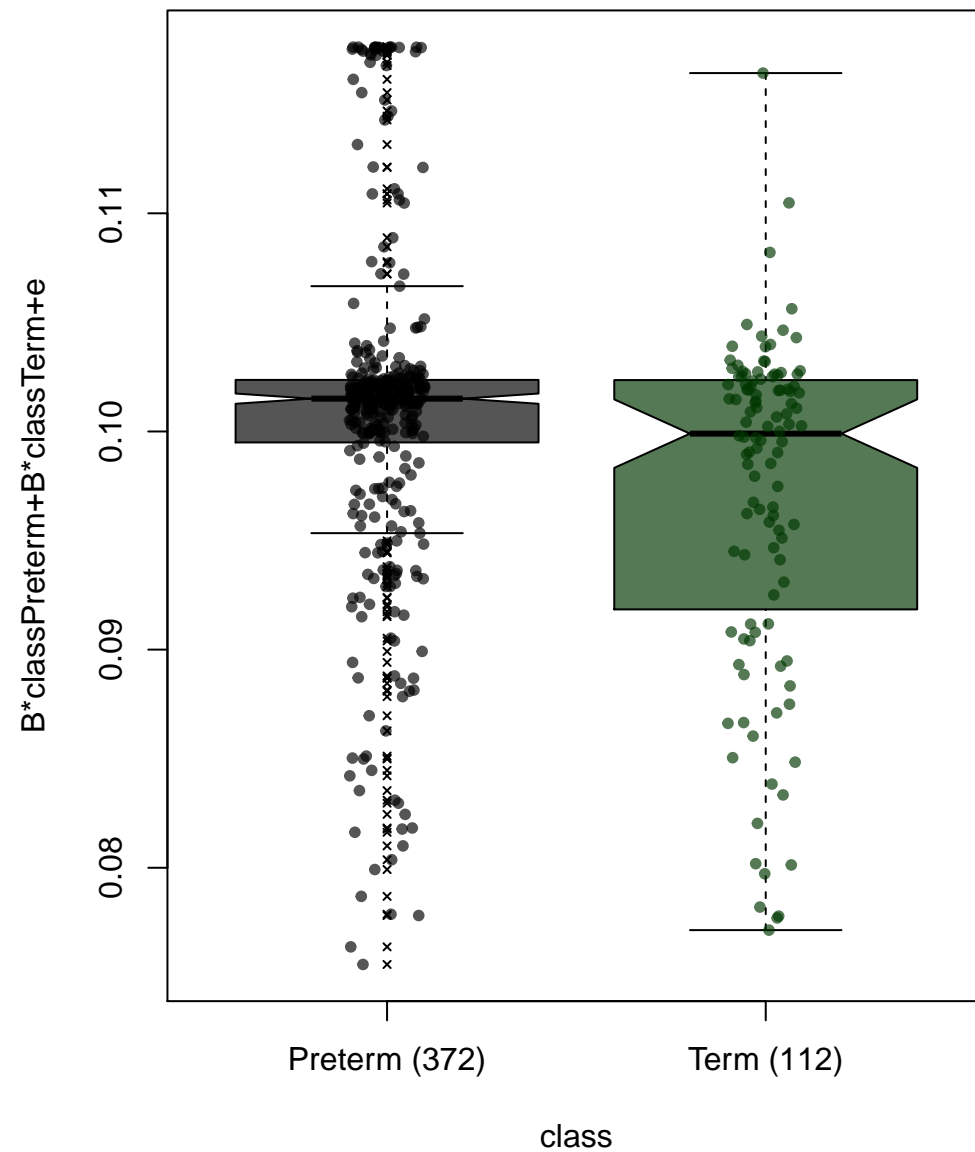

classTerm (-0.00252 sd 0.000552, p=6.16e-06, q=1.09e-05)

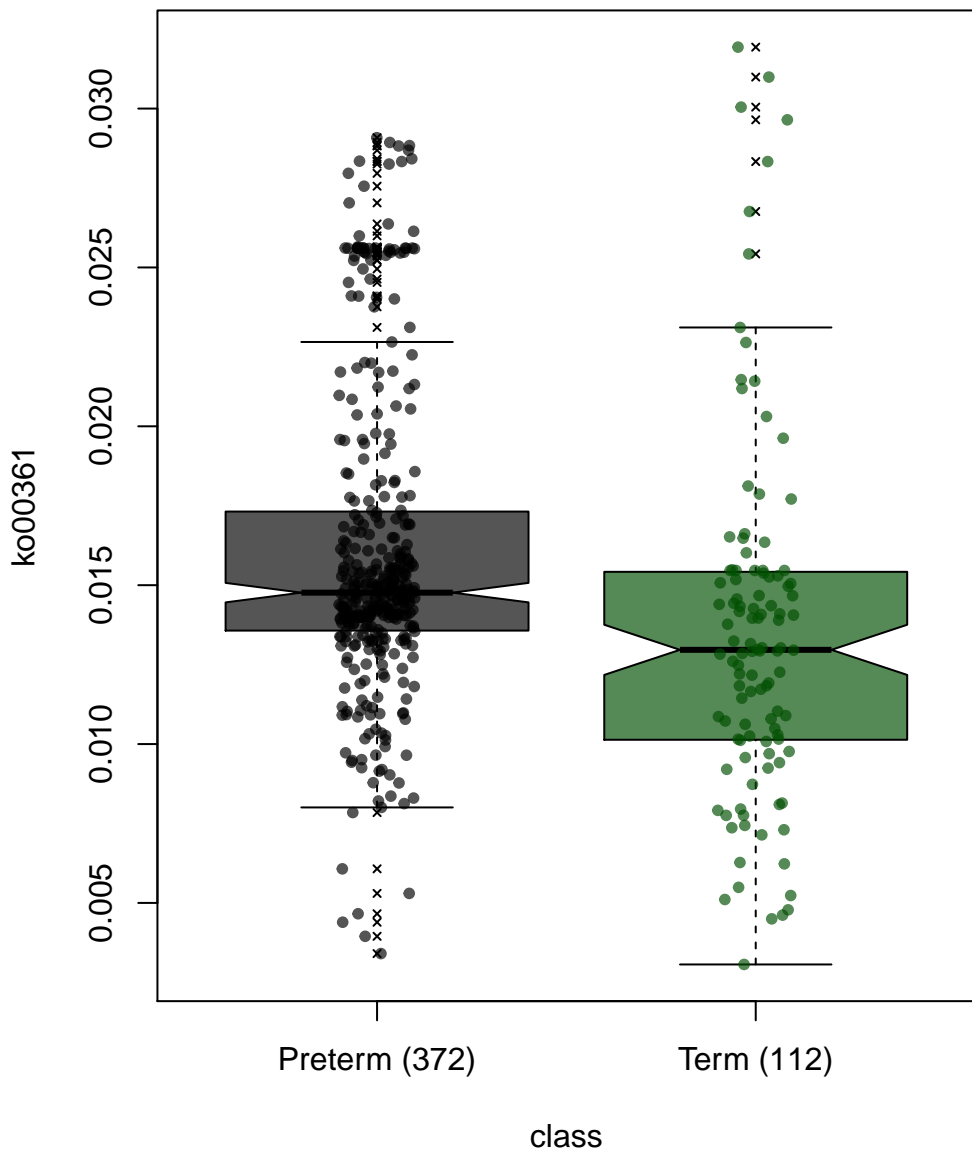

Partial Residual Plot

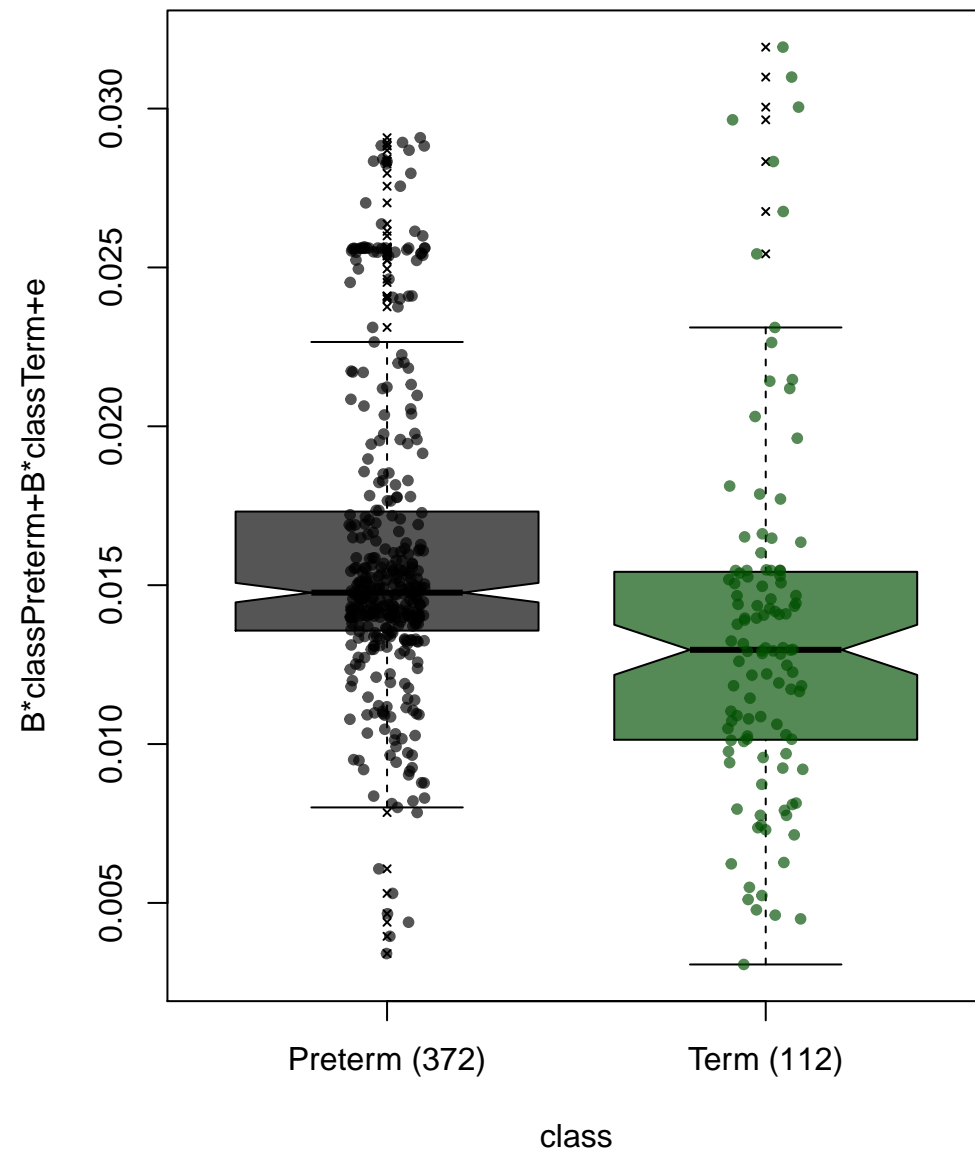

classTerm (0.00557 sd 0.00122, p=6.38e-06, q=1.12e-05)

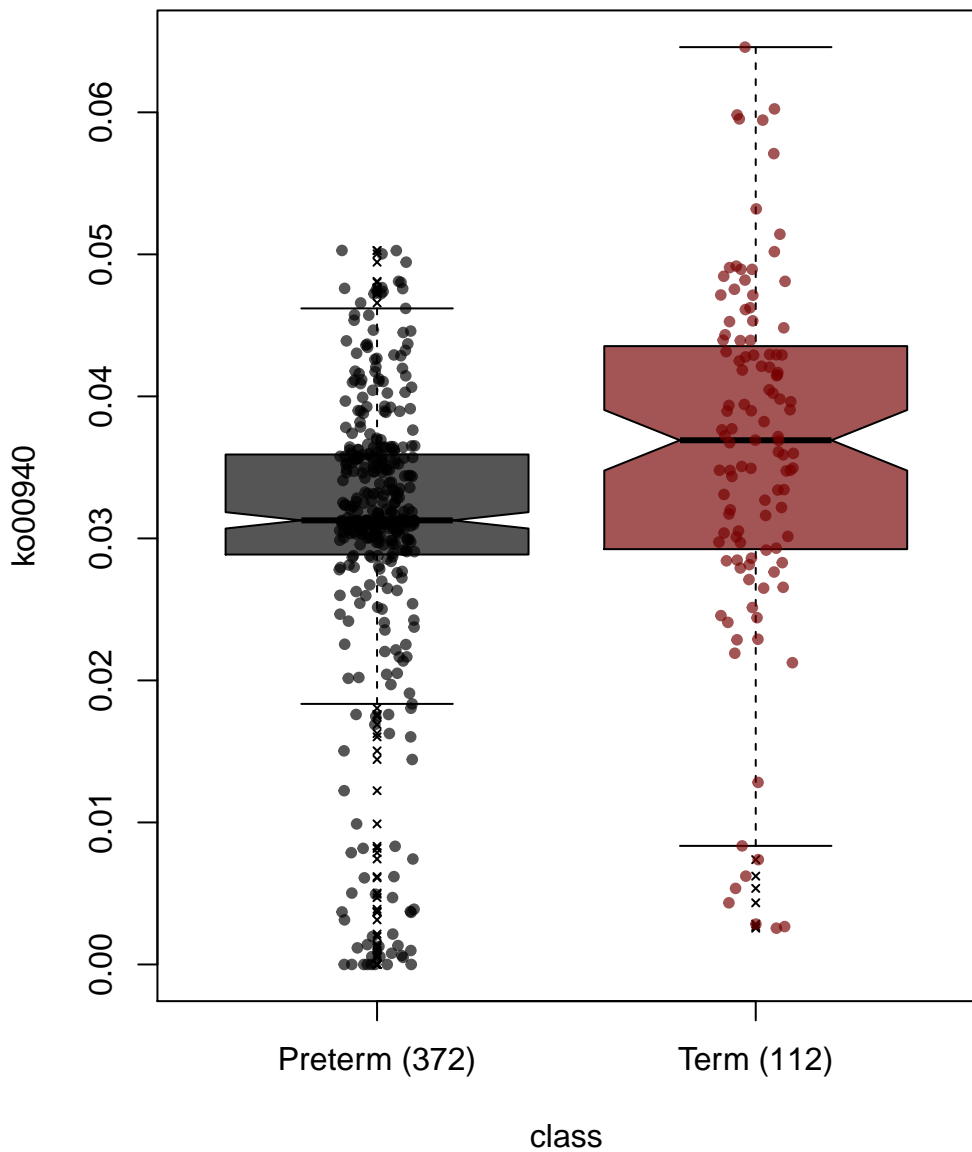

Partial Residual Plot

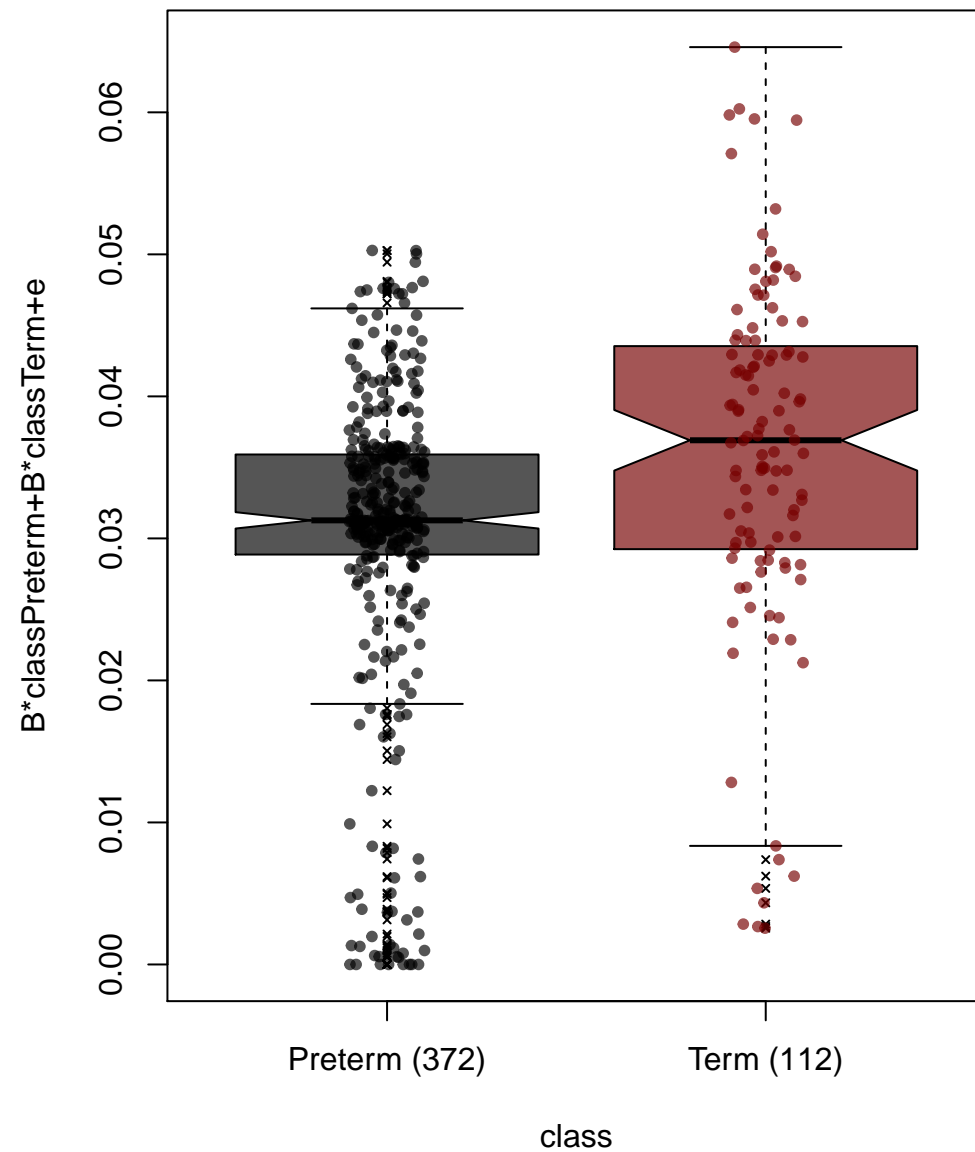

classTerm ( $-0.00248$  sd  $0.000547$ ,  $p=7.12e-06$ ,  $q=1.24e-05$ )

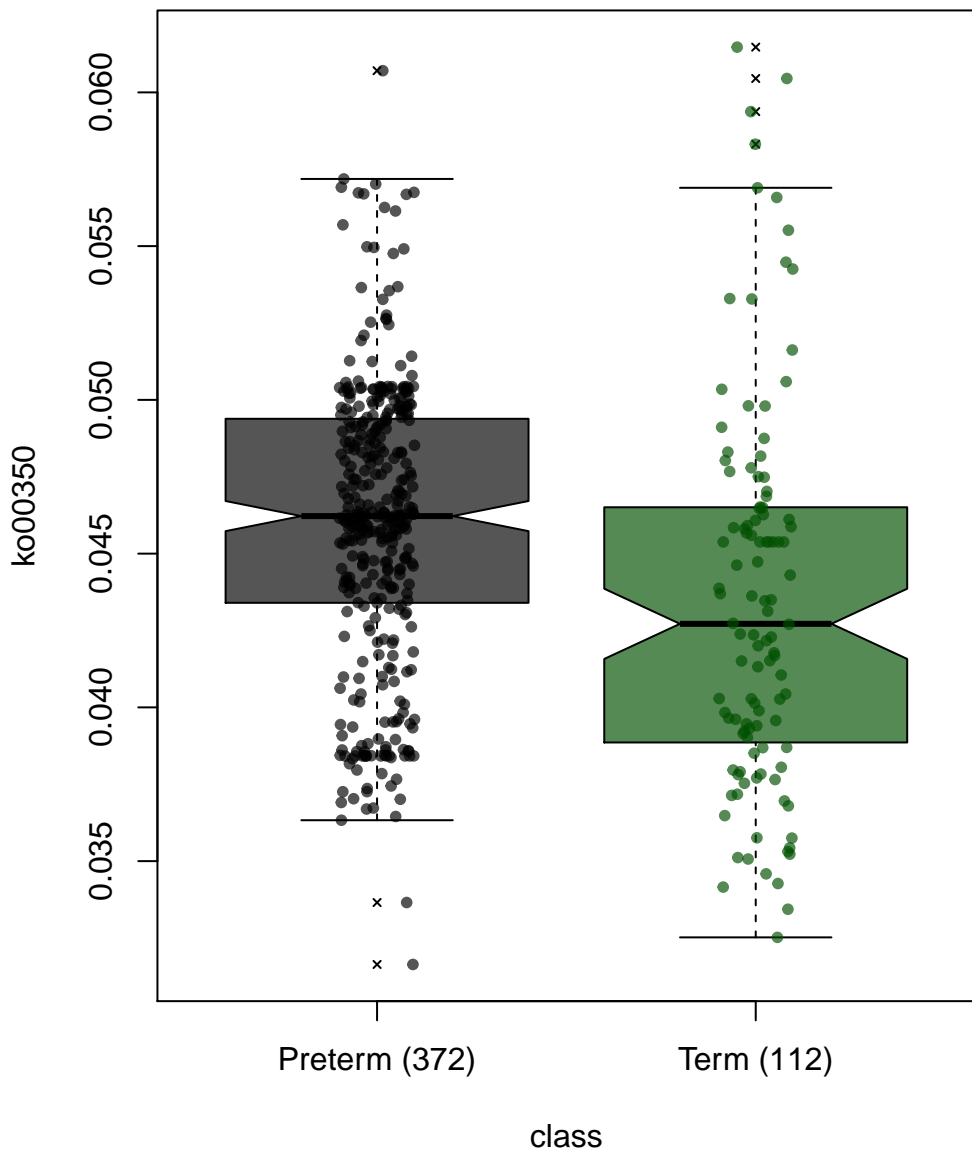

Partial Residual Plot

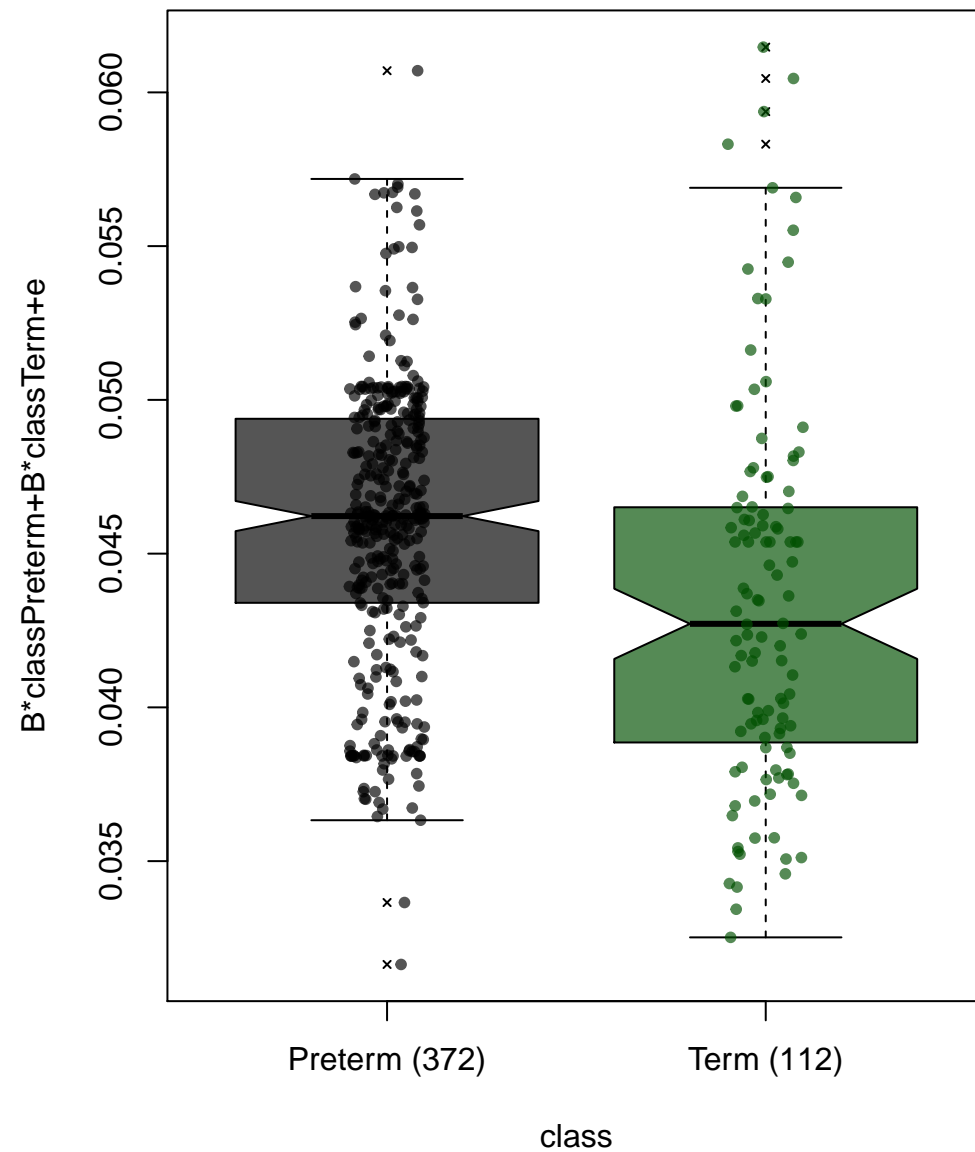

classTerm (0.00282 sd 0.000627, p=8.59e-06, q=1.49e-05)

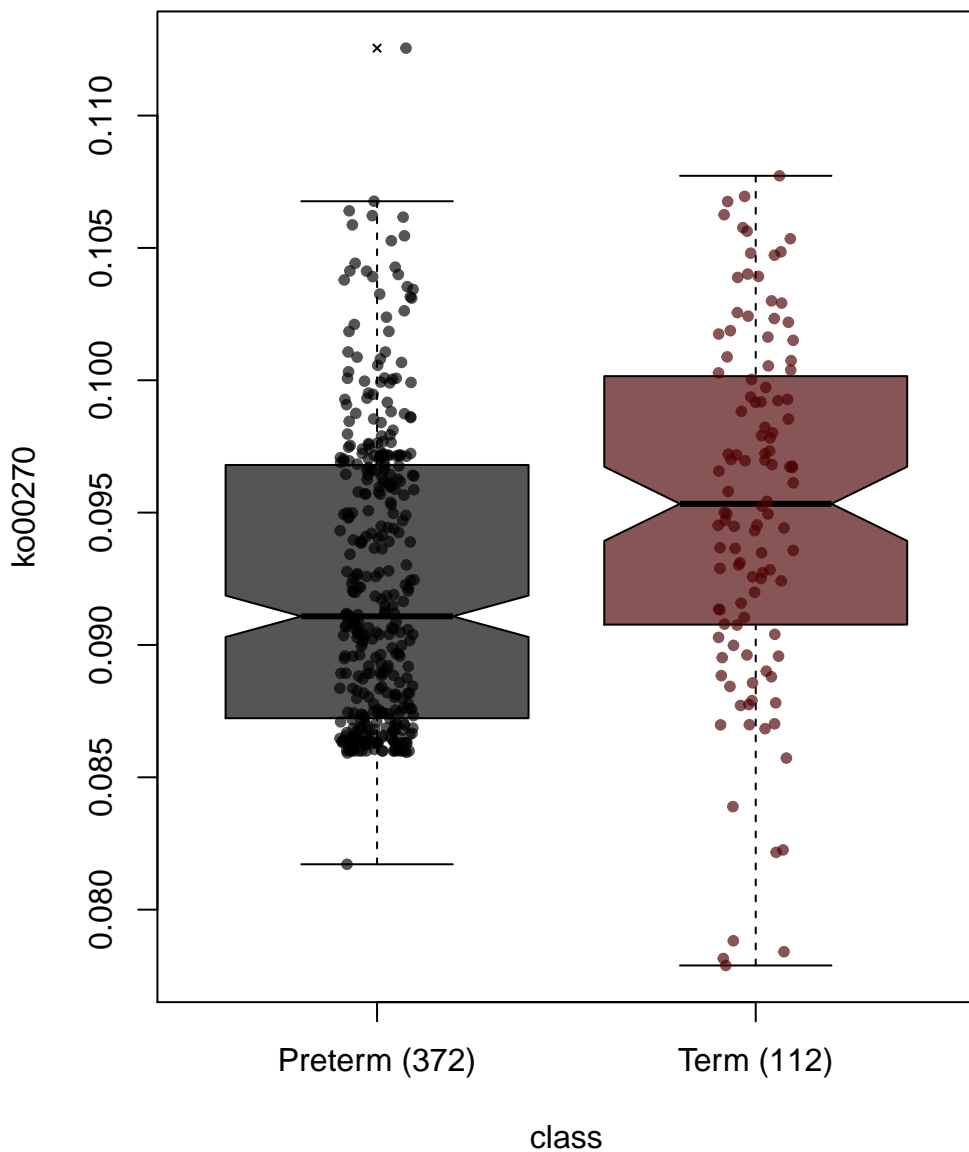

Partial Residual Plot

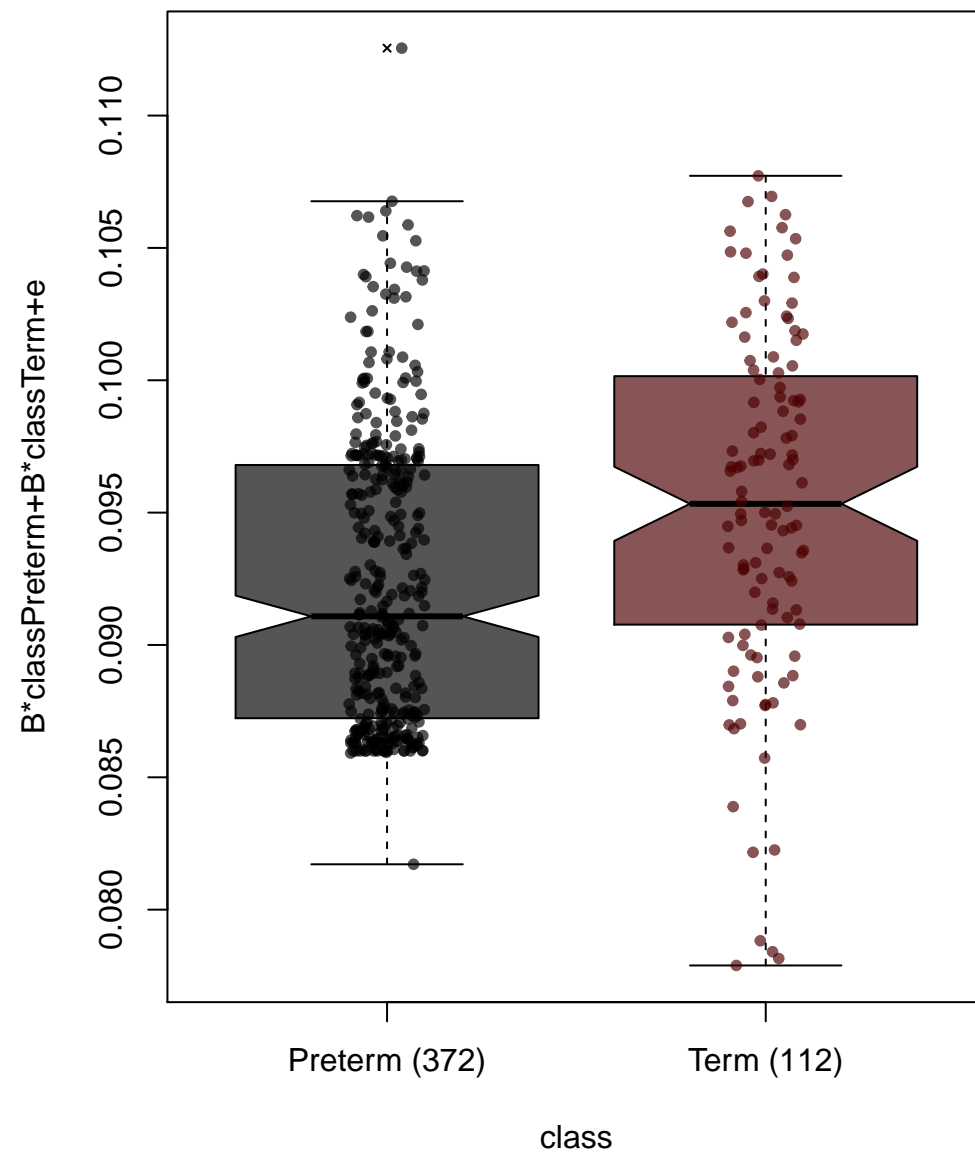

classTerm (0.00263 sd 0.00059, p=1.04e-05, q=1.8e-05)

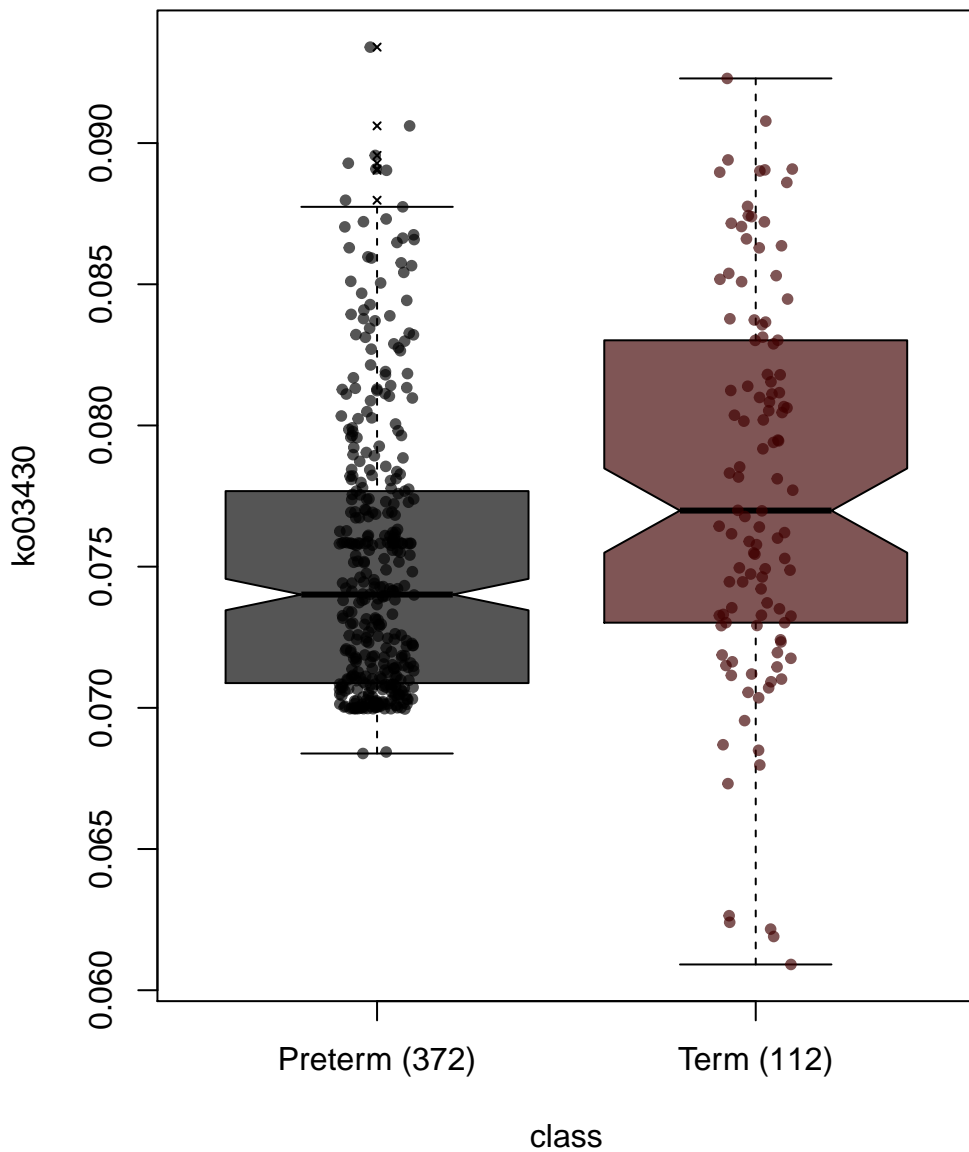

Partial Residual Plot

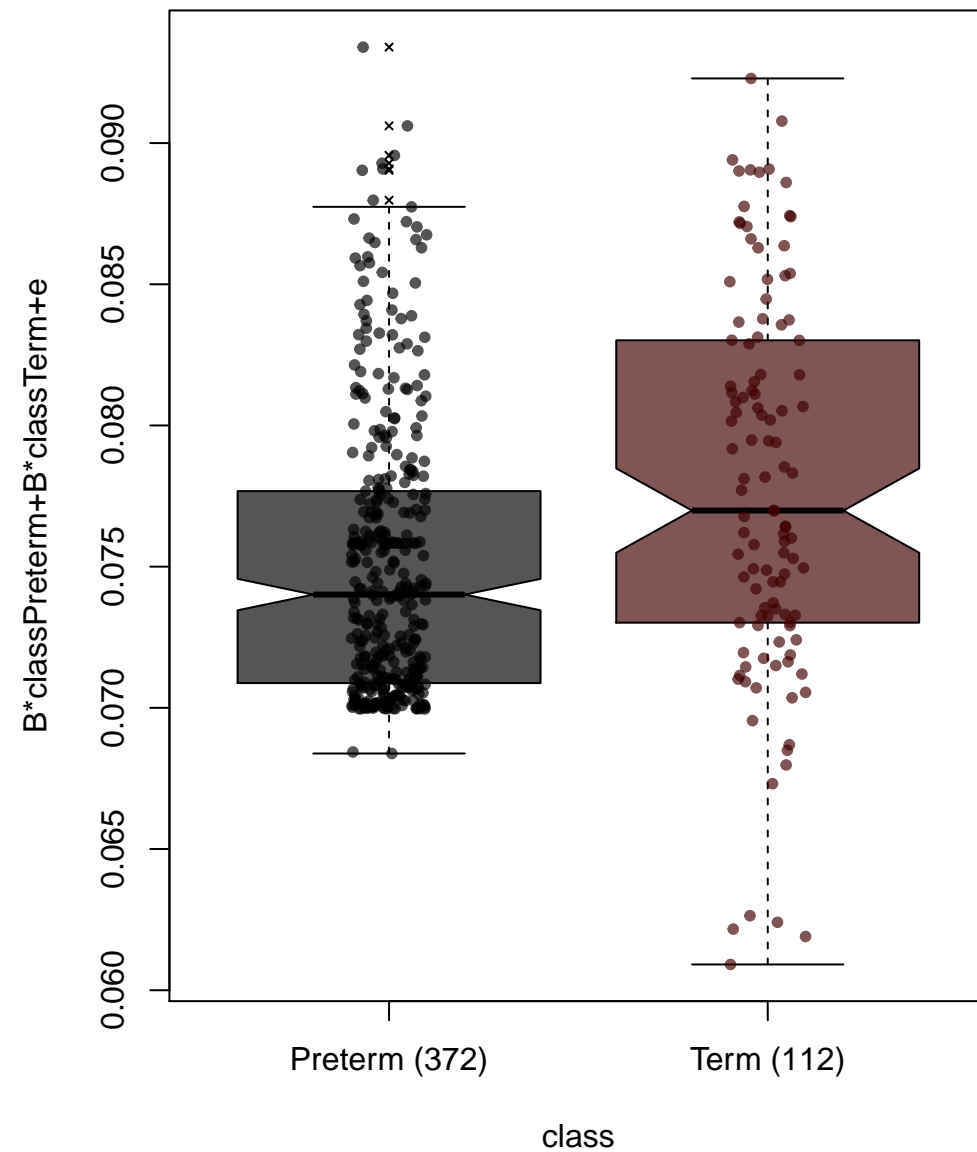

classTerm (0.00173 sd 0.00039, p=1.1e-05, q=1.89e-05)

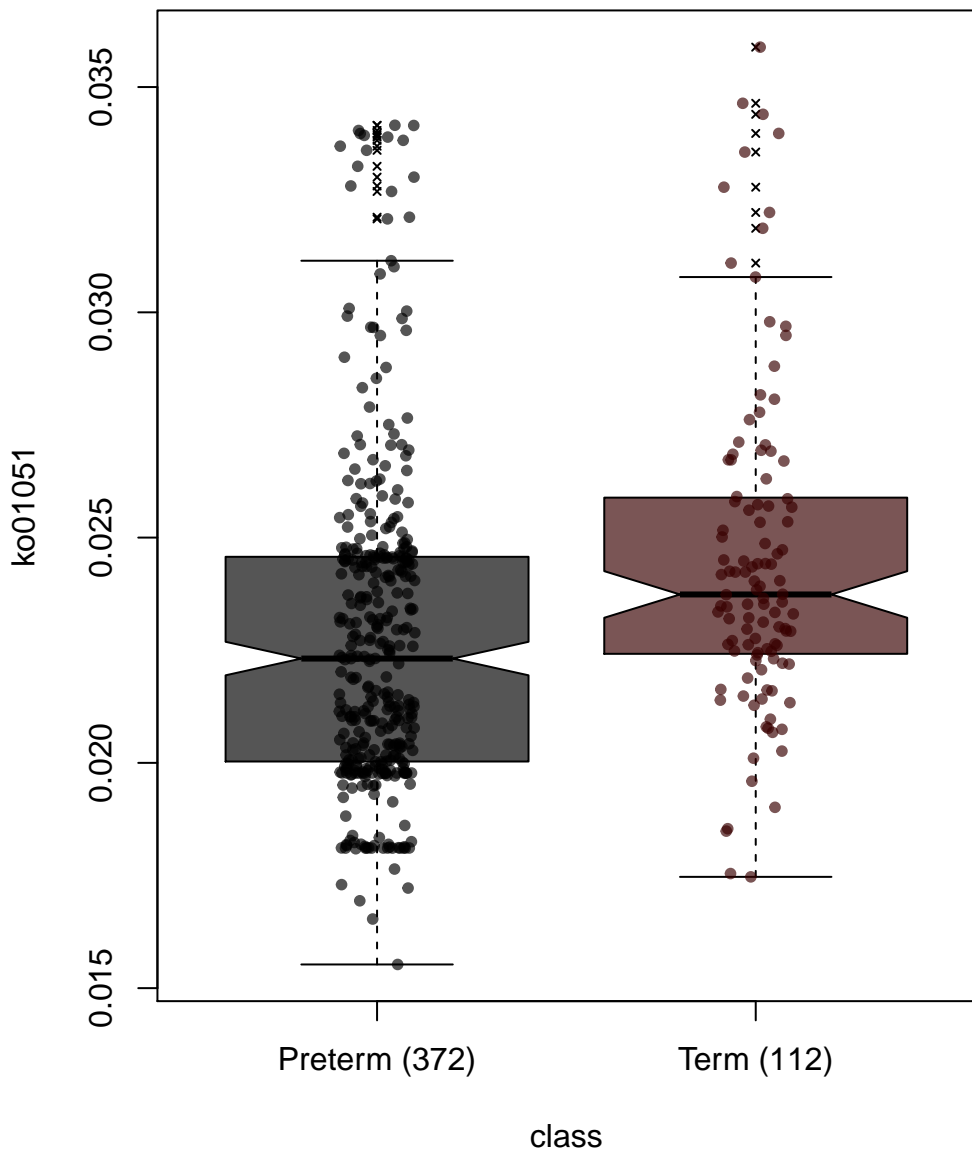

Partial Residual Plot

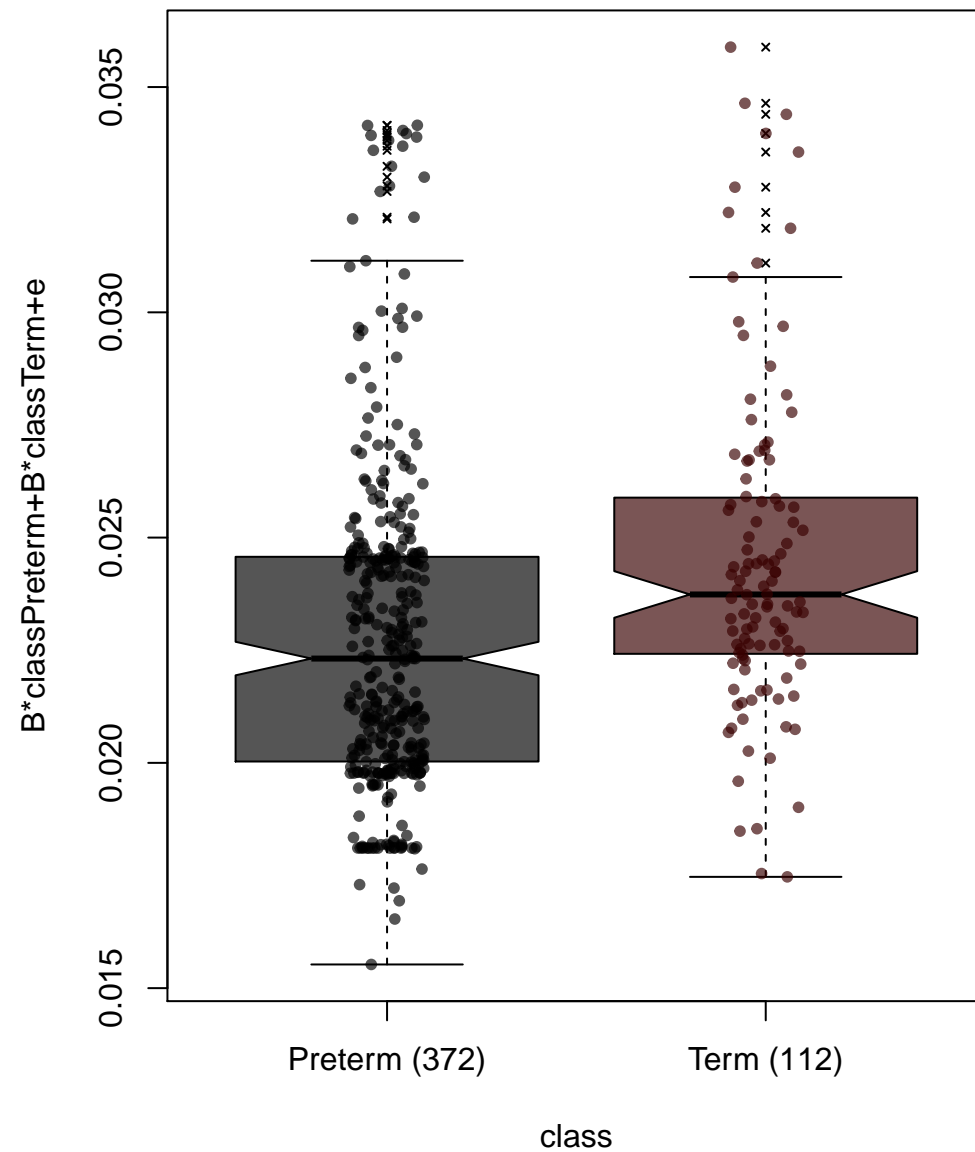



classTerm ( $-0.003$  sd  $0.000685$ ,  $p=1.48e-05$ ,  $q=2.51e-05$ )

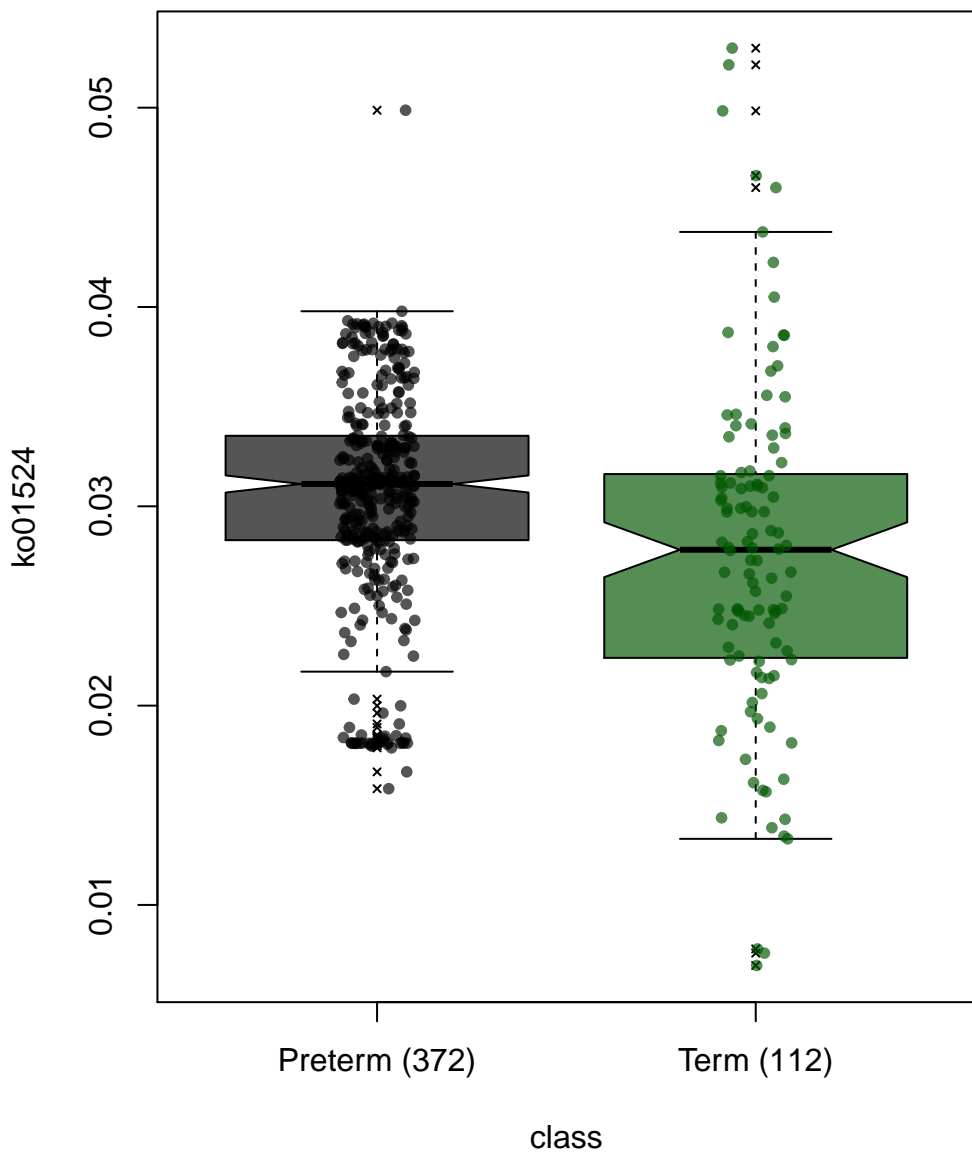

Partial Residual Plot

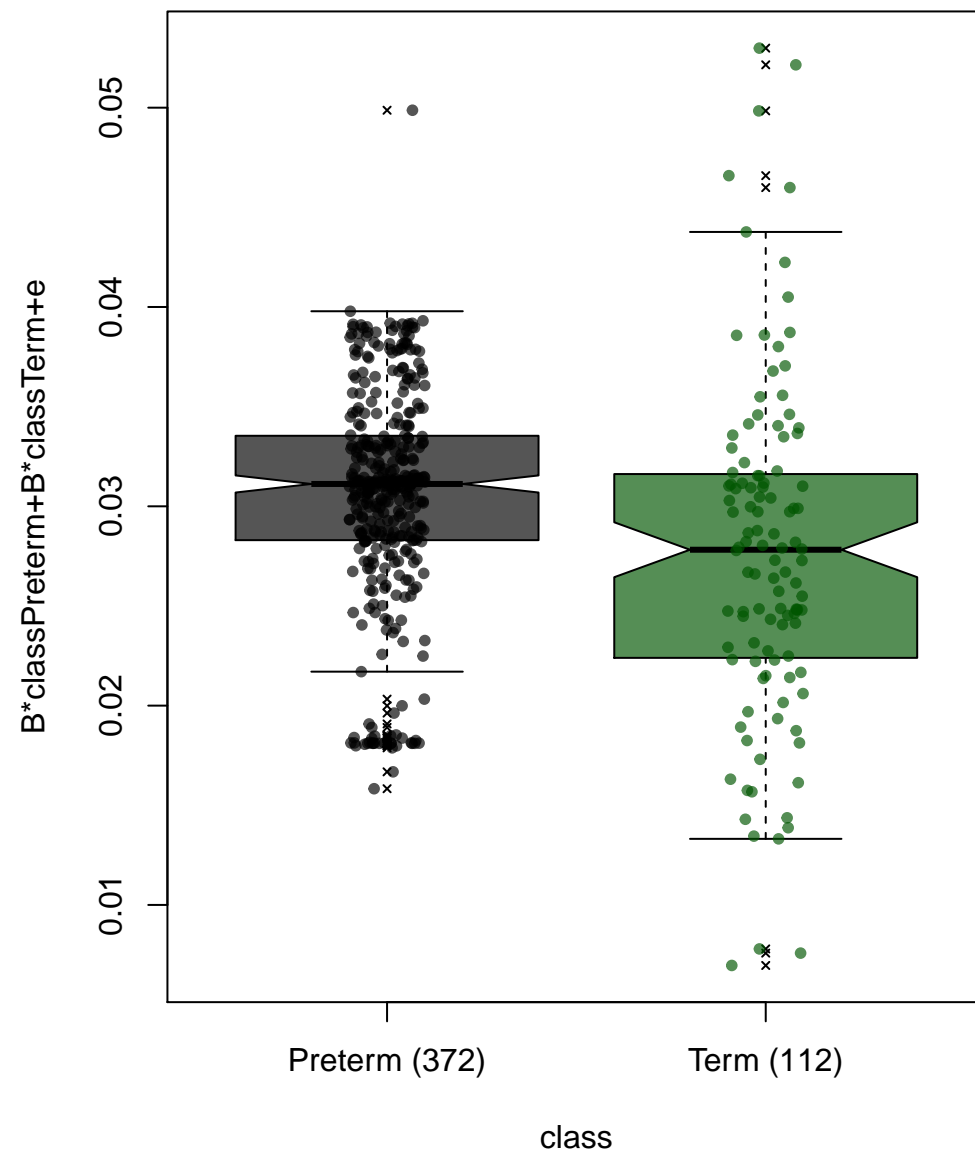

classTerm ( $-0.00762$  sd  $0.00175$ ,  $p=1.56e-05$ ,  $q=2.64e-05$ )

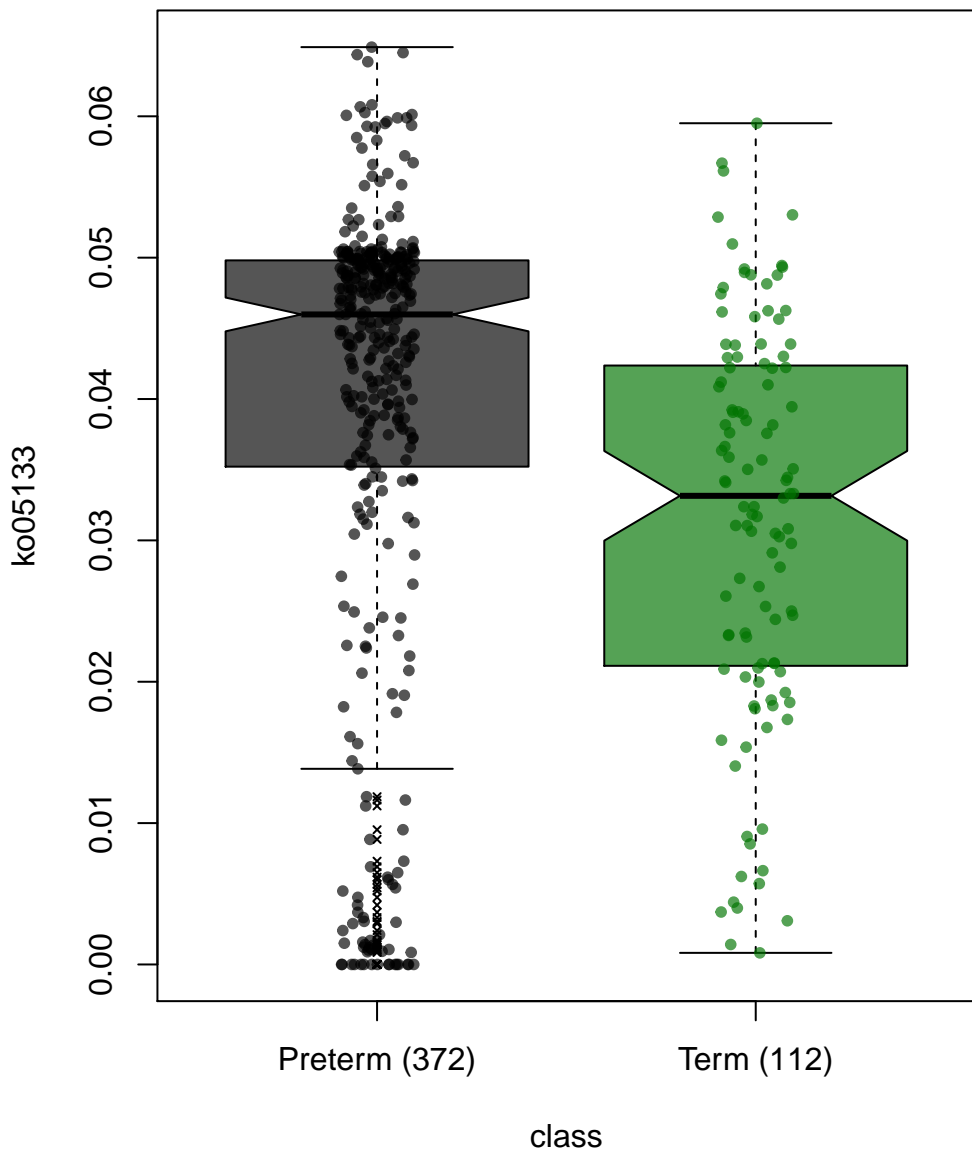

Partial Residual Plot

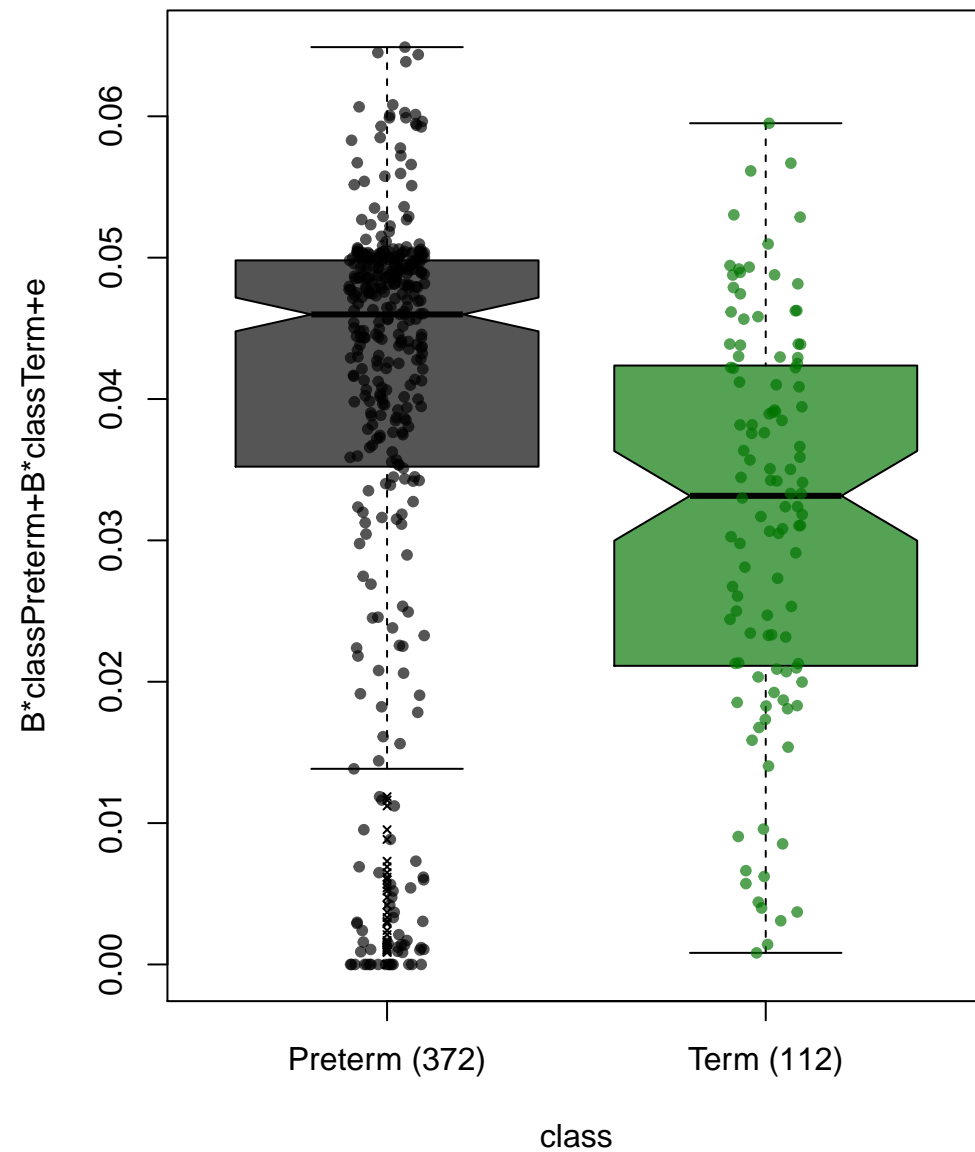

classTerm (-0.00206 sd 0.000476, p=1.78e-05, q=3e-05)

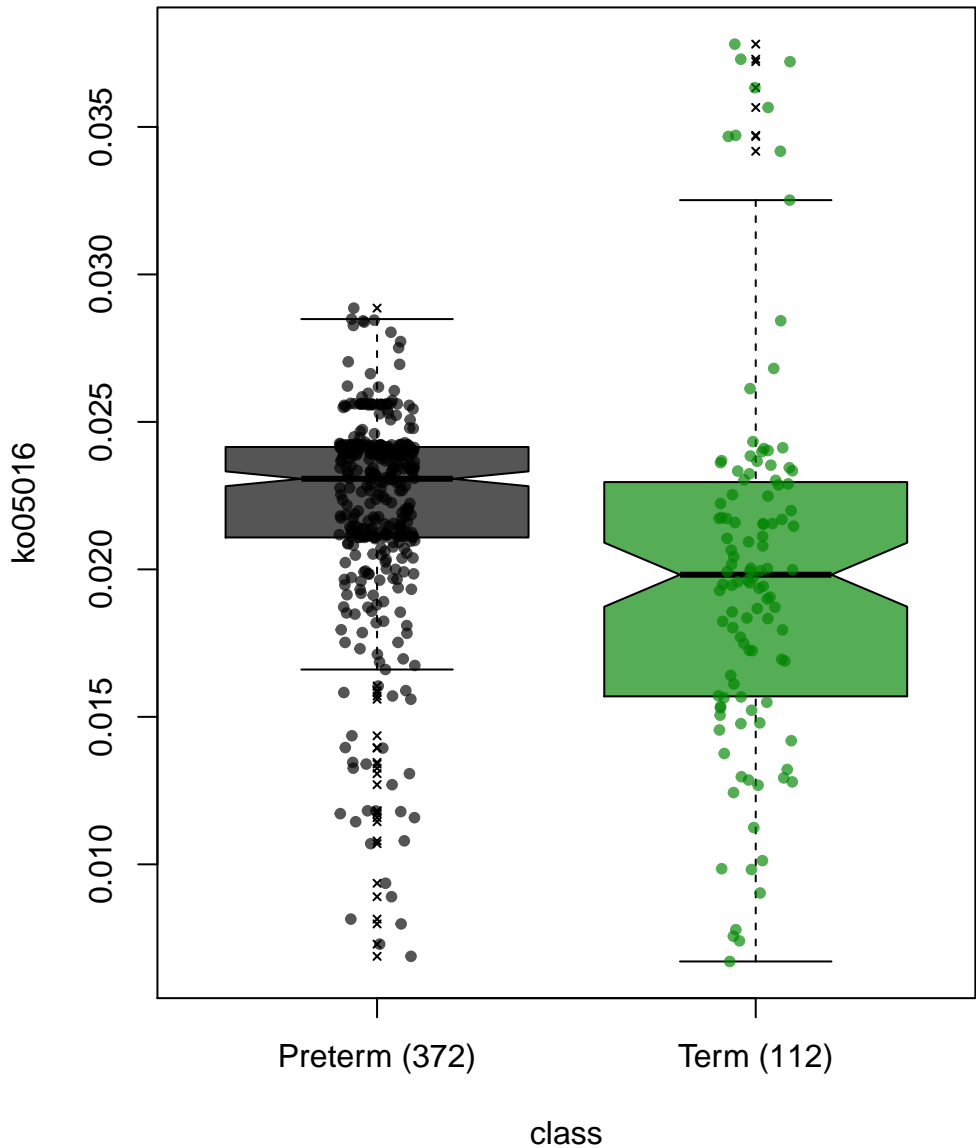

Partial Residual Plot

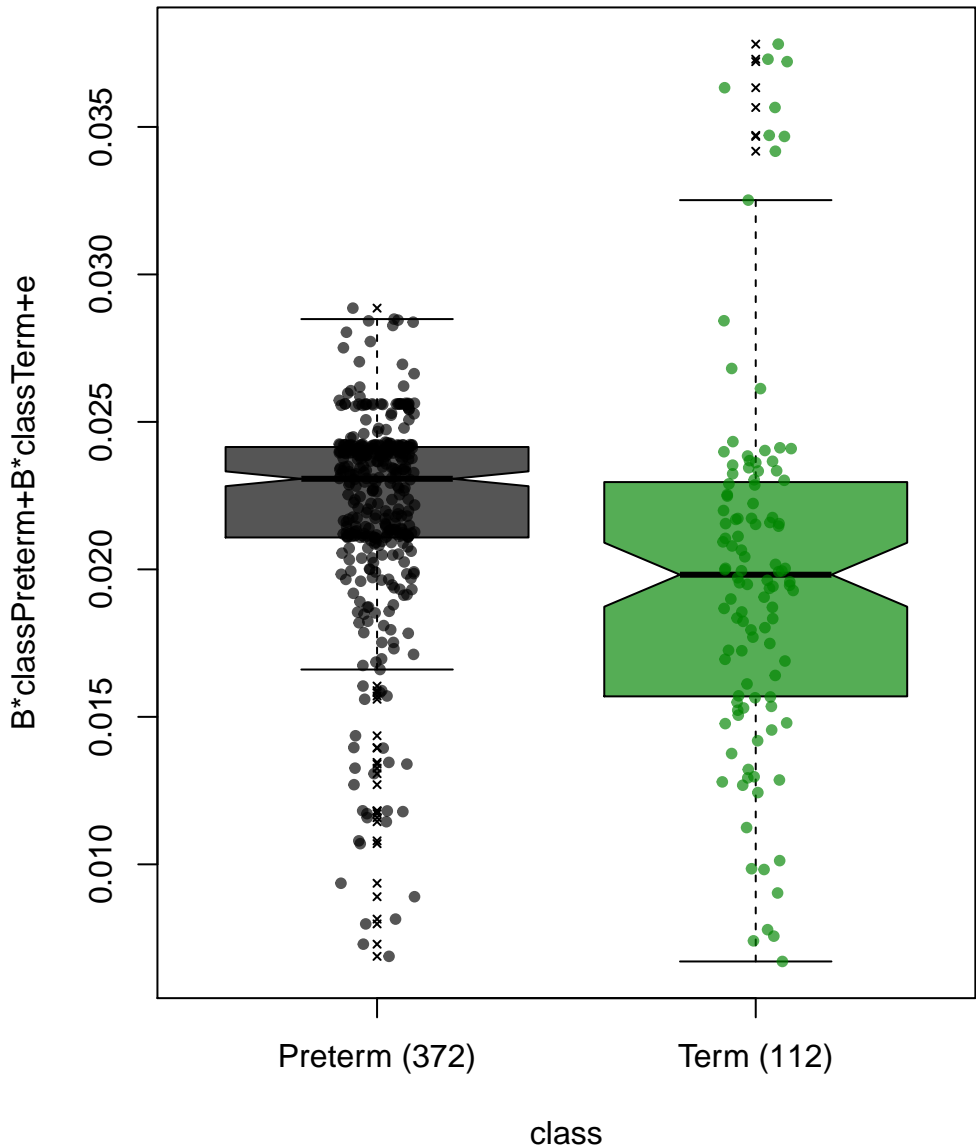

classTerm (−0.00322 sd 0.000746, p=1.85e−05, q=3.09e−05)

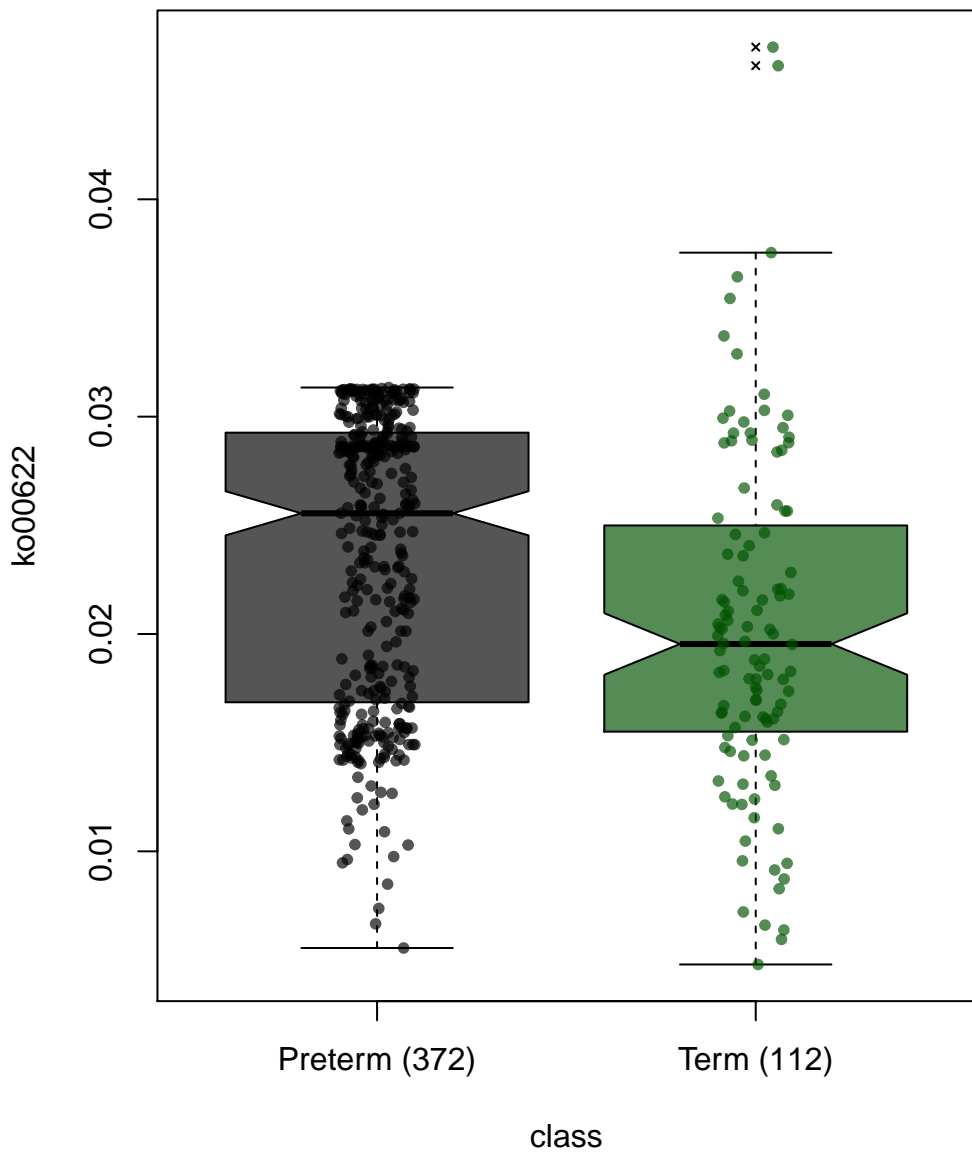

Partial Residual Plot

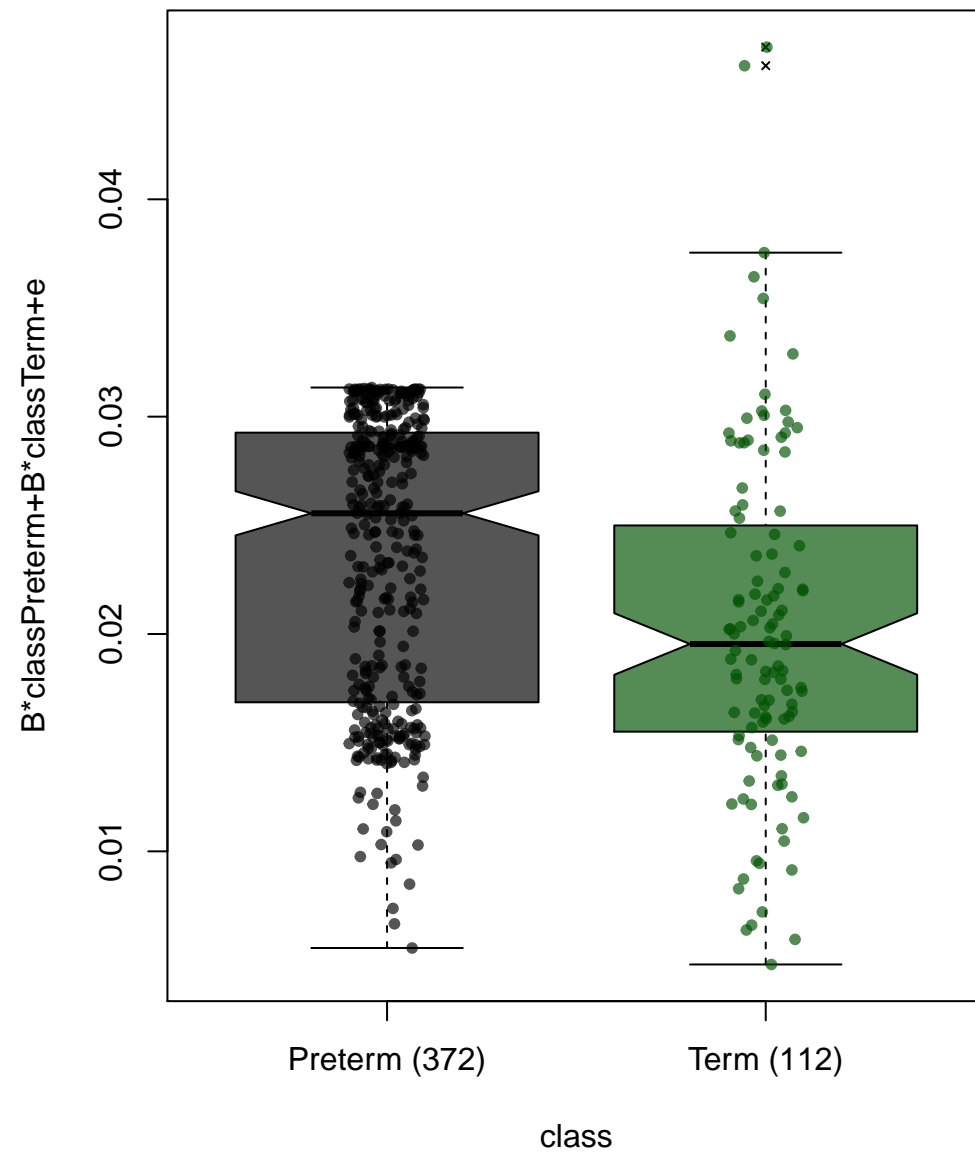

classTerm (0.00298 sd 0.000708, p=3.09e-05, q=5.13e-05)

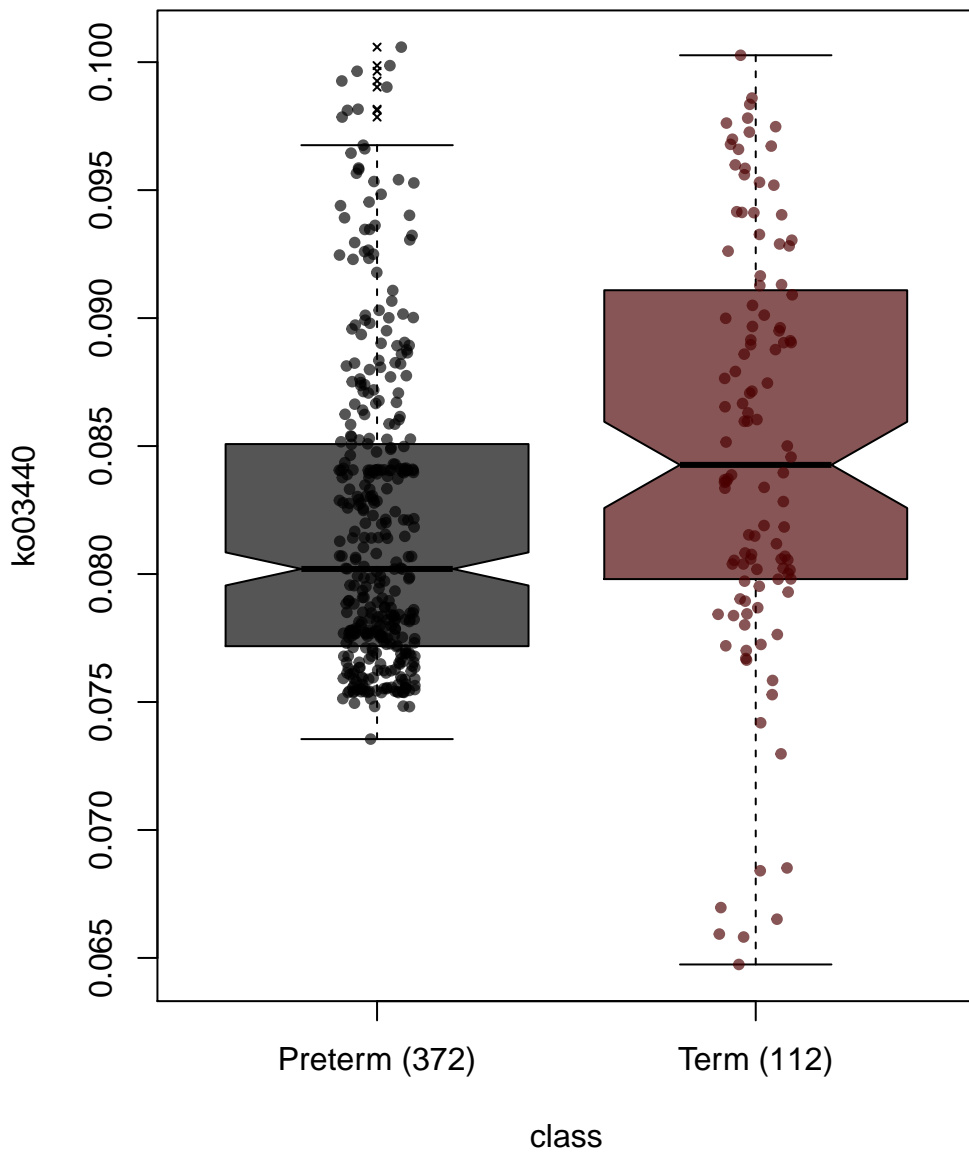

Partial Residual Plot

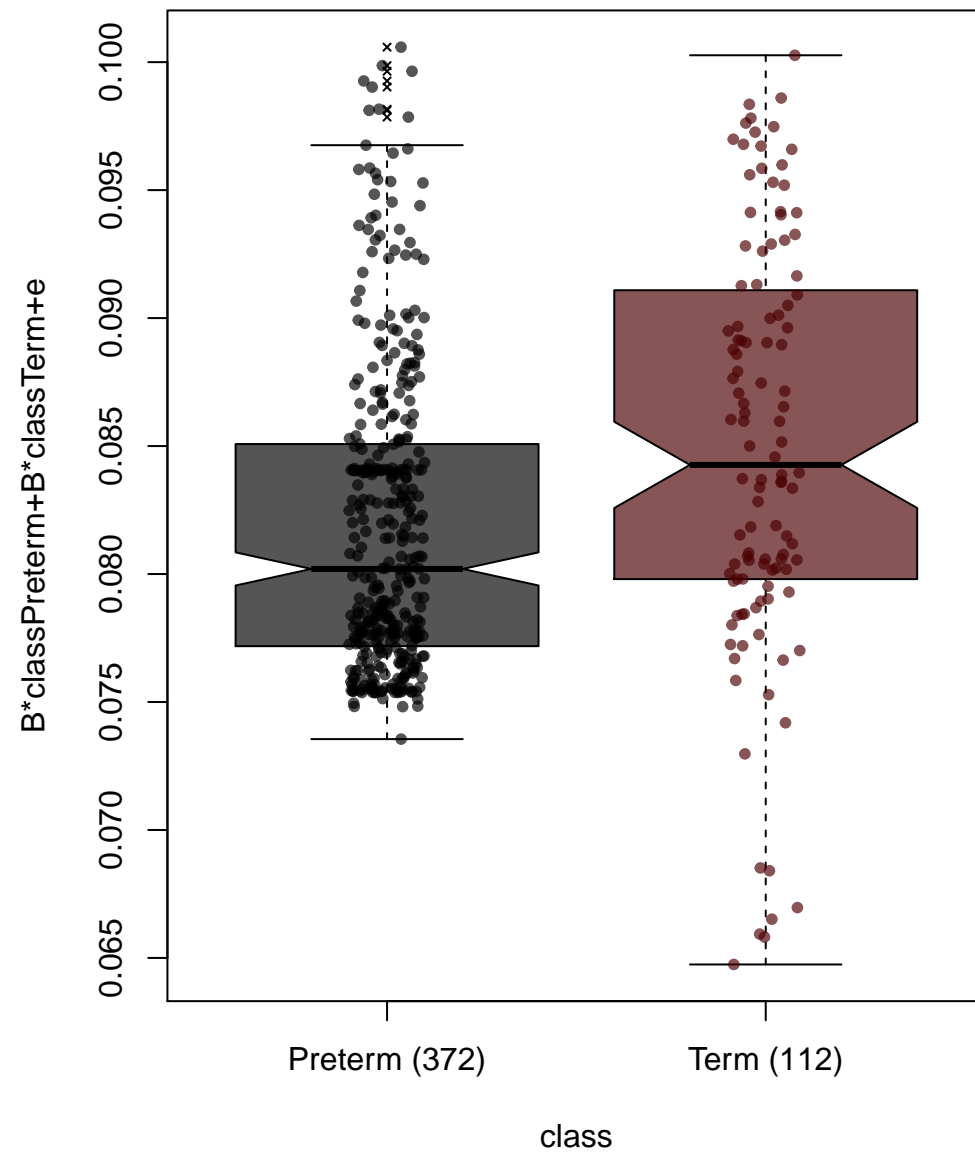

classTerm (-0.00205 sd 0.000489, p=3.18e-05, q=5.25e-05)

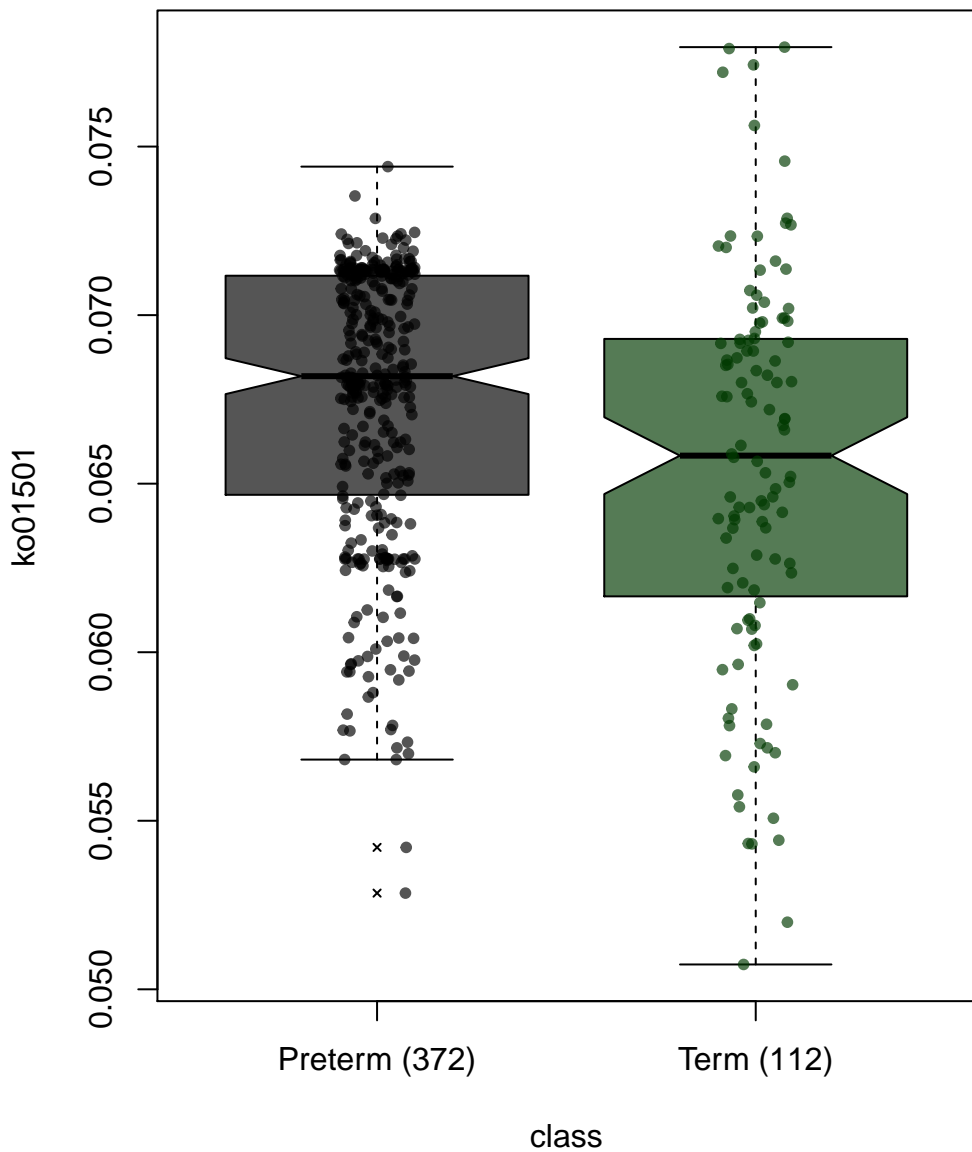

Partial Residual Plot

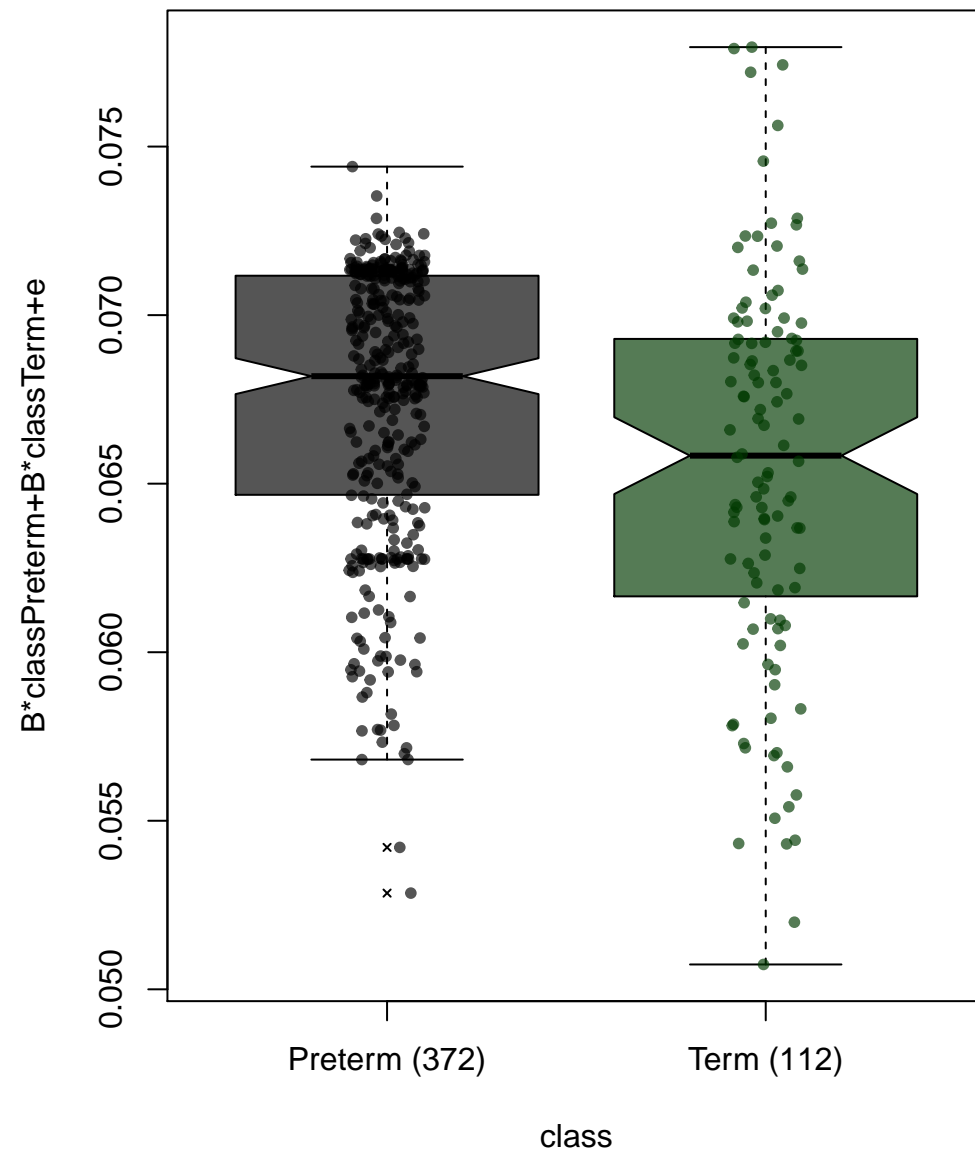

**classTerm (0.00288 sd 0.000685, p=3.22e-05, q=5.29e-05)**

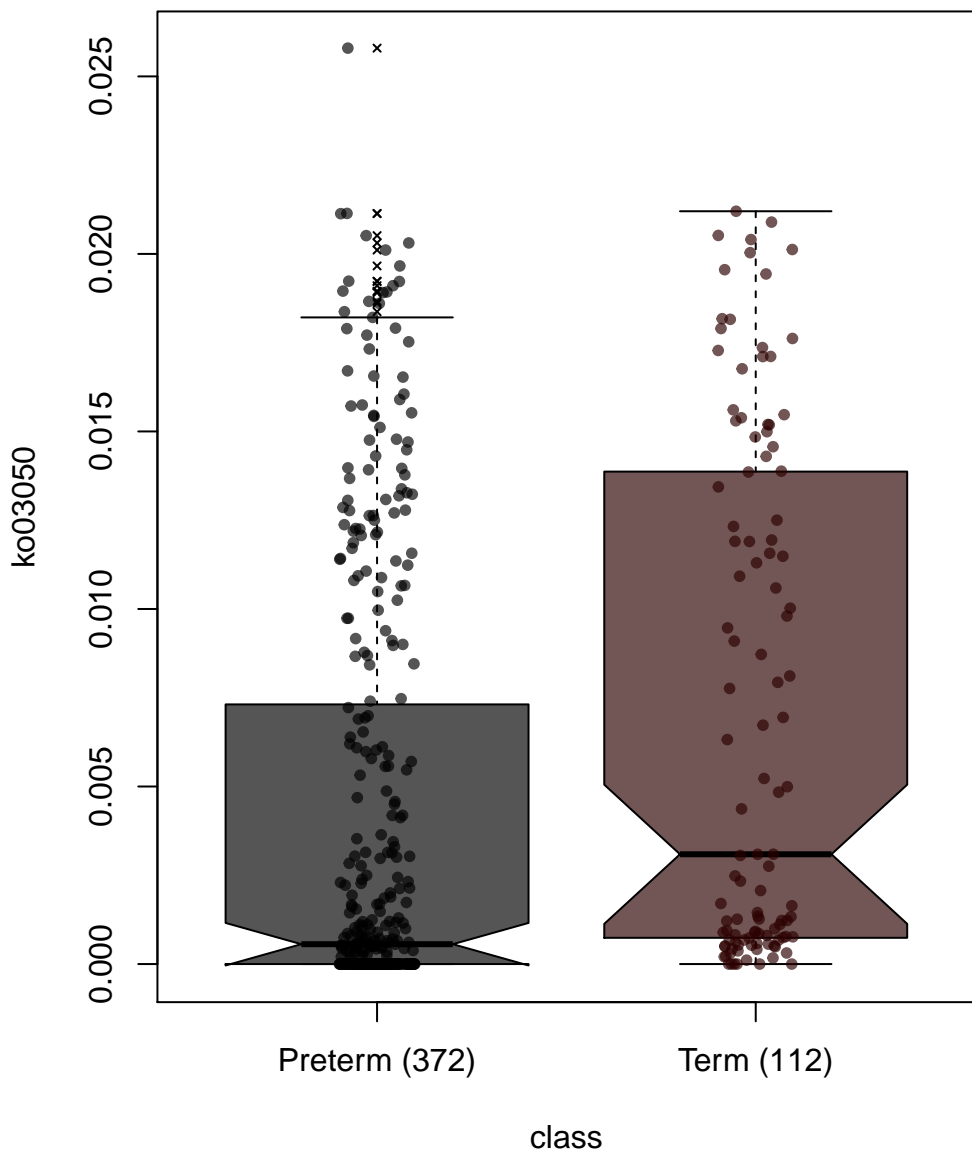

### Partial Residual Plot

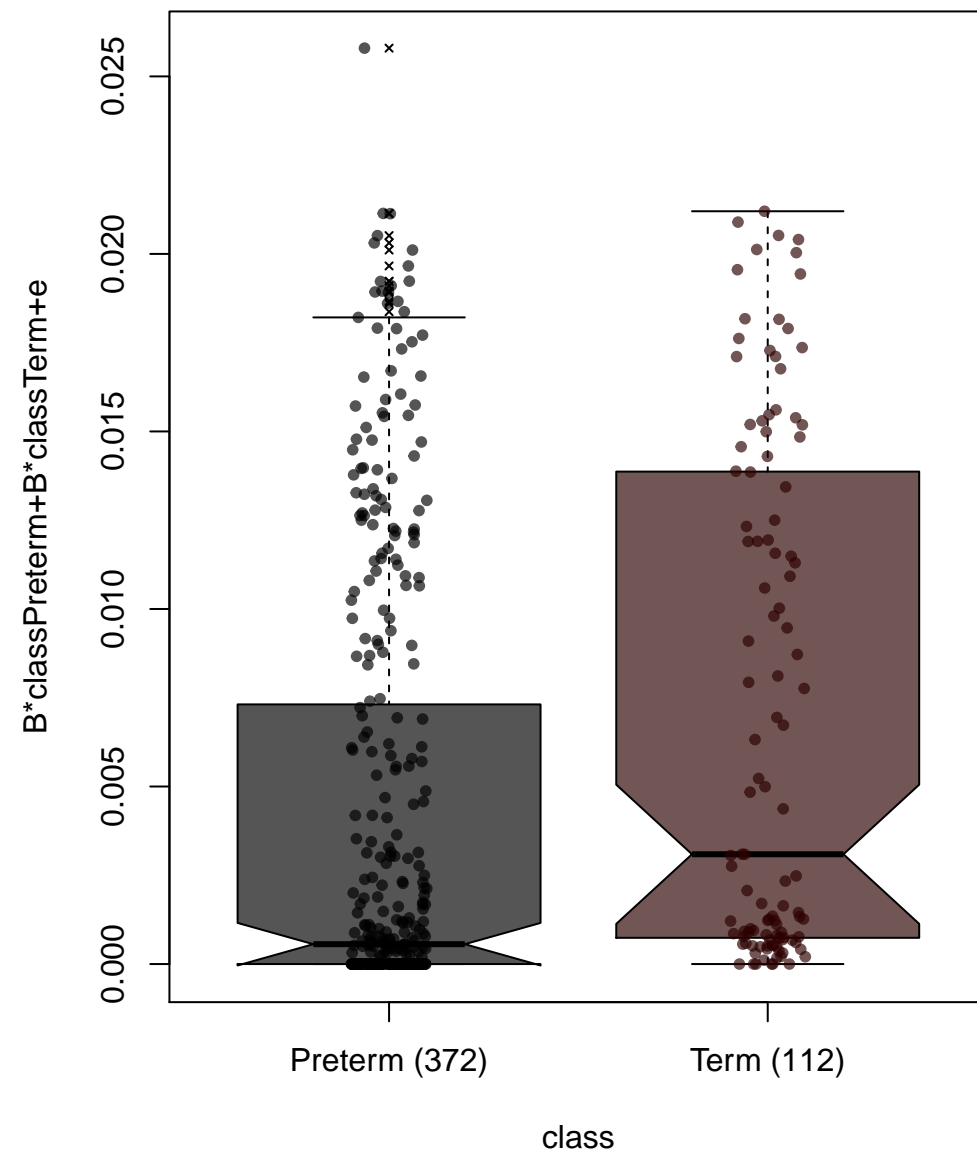

classTerm (0.00152 sd 0.000372, p=5.13e-05, q=8.37e-05)

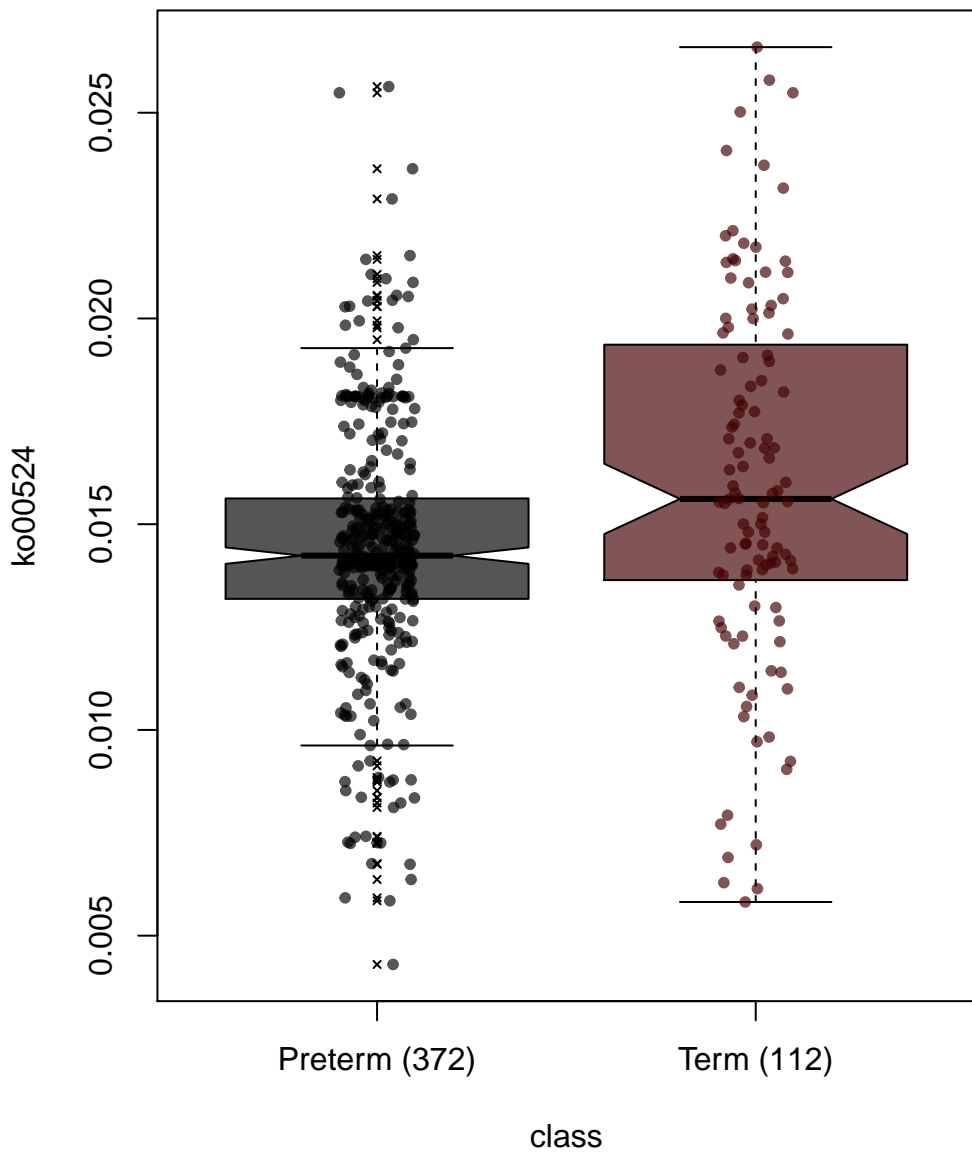

Partial Residual Plot

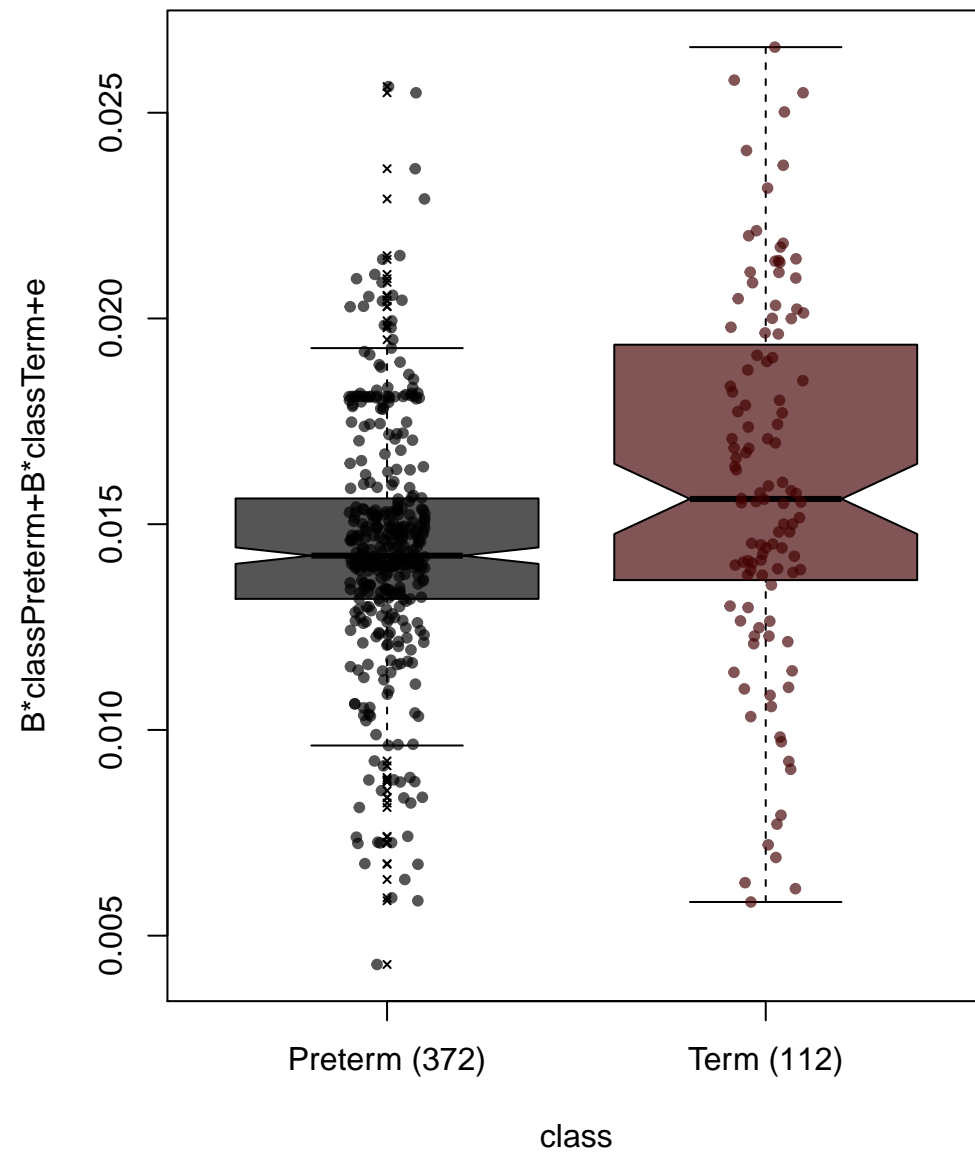



classTerm (0.00244 sd 0.000597, p=5.27e-05, q=8.55e-05)

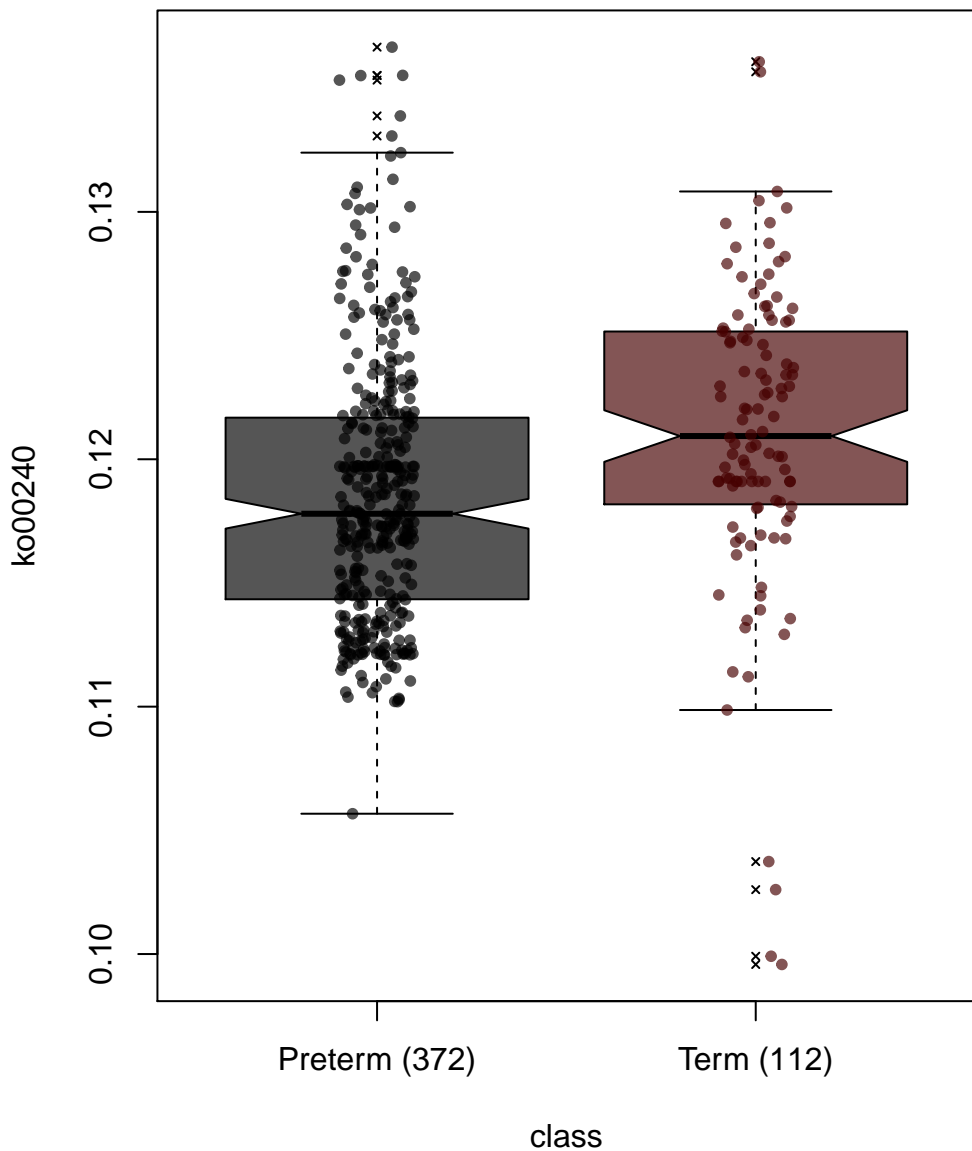

Partial Residual Plot

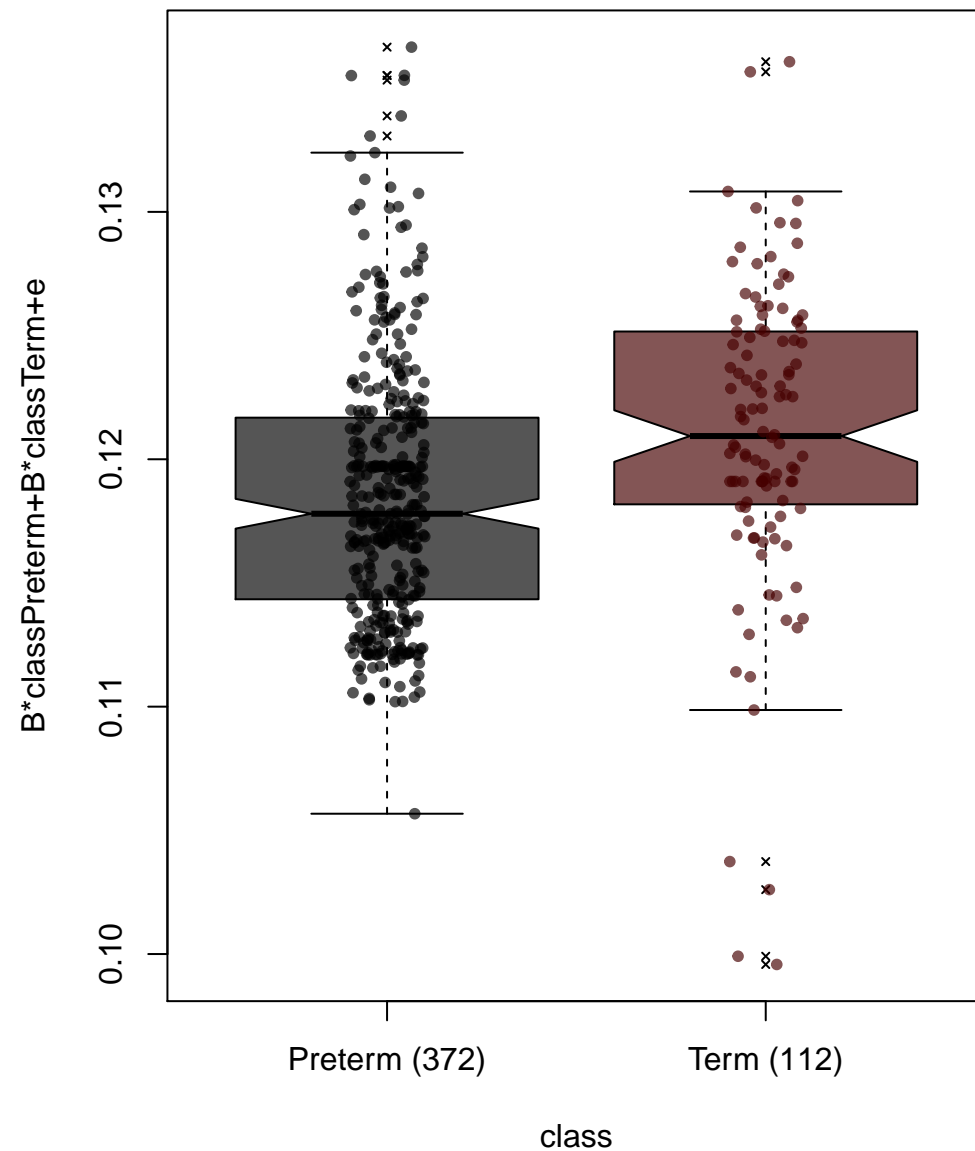

classTerm (0.0022 sd 0.00054, p=5.33e-05, q=8.55e-05)

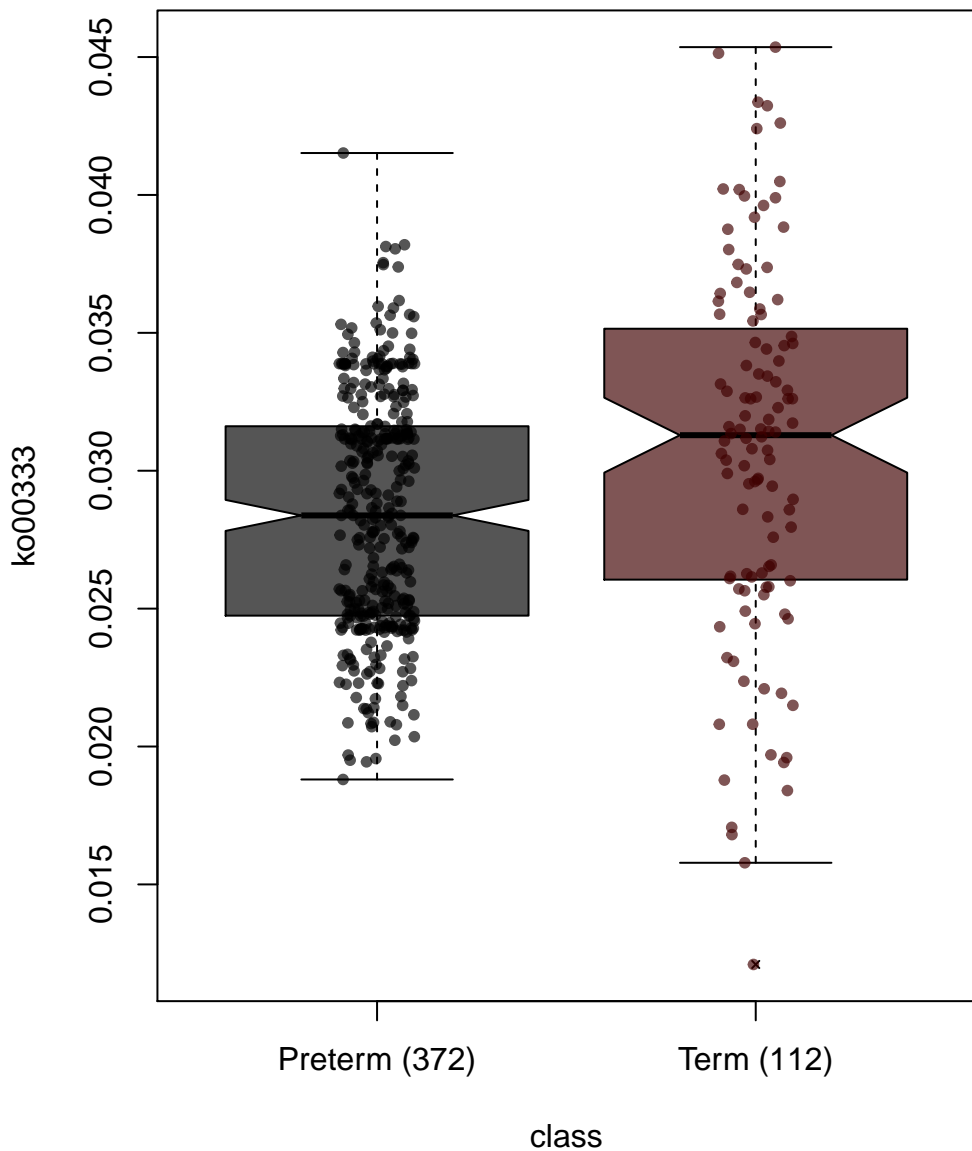

Partial Residual Plot

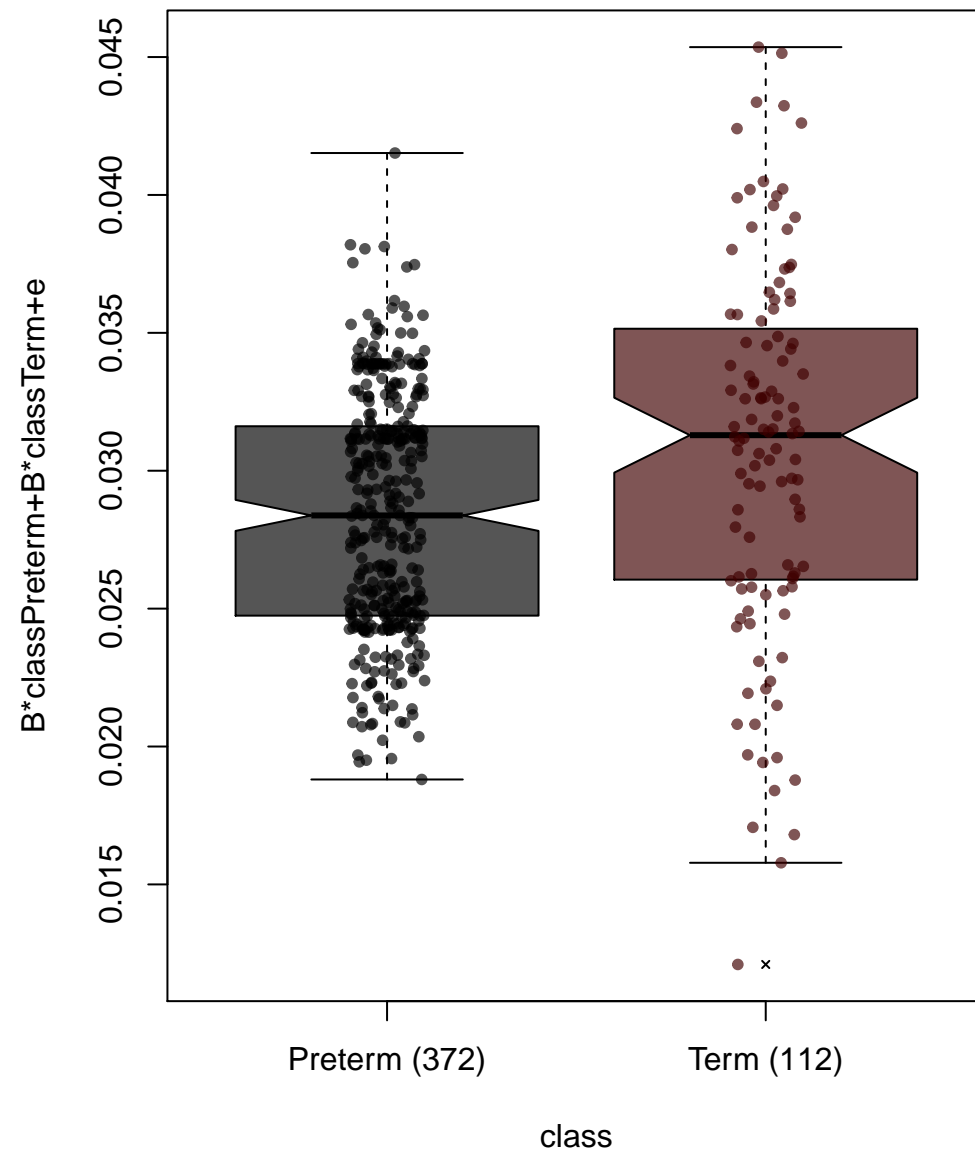

classTerm (−0.00119 sd 0.000293, p=5.33e−05, q=8.55e−05)

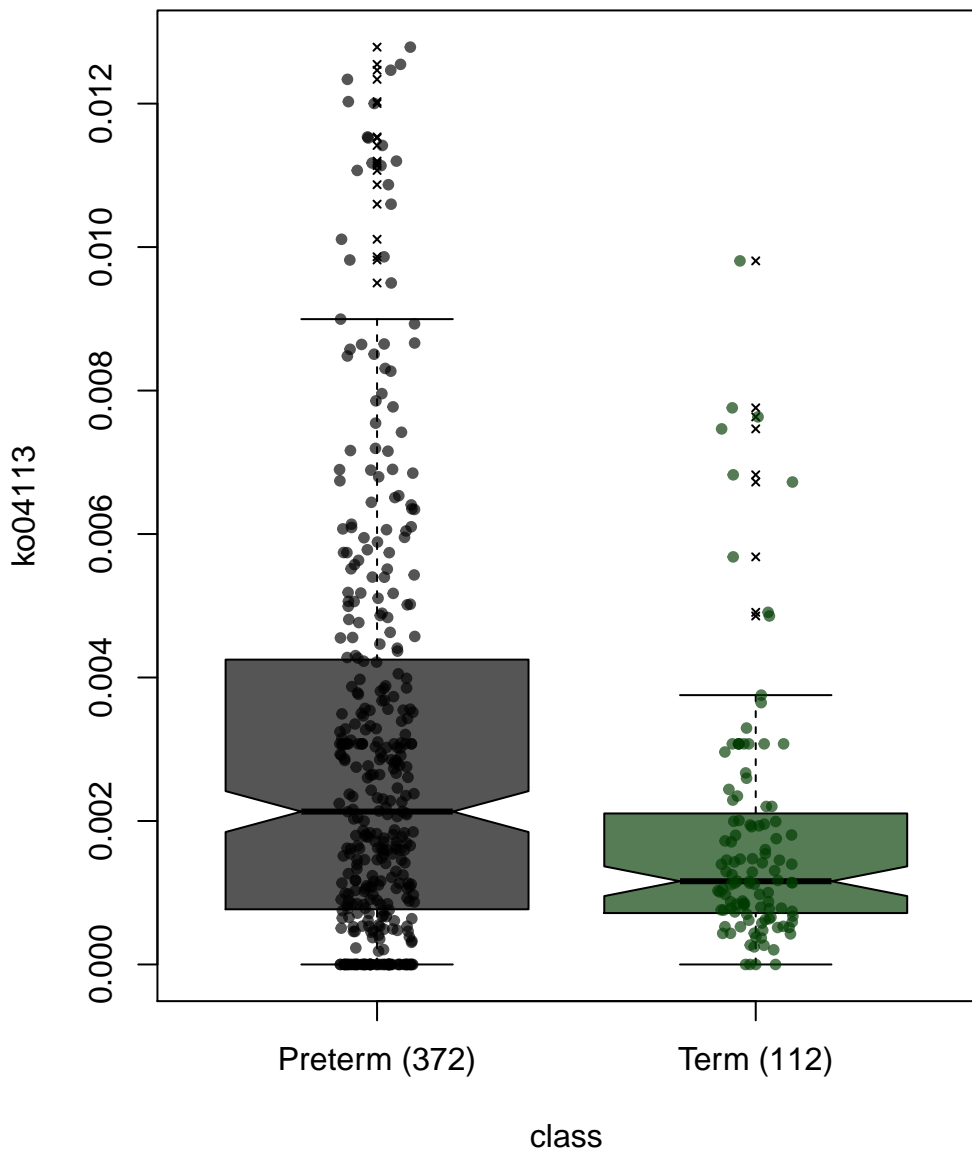

Partial Residual Plot

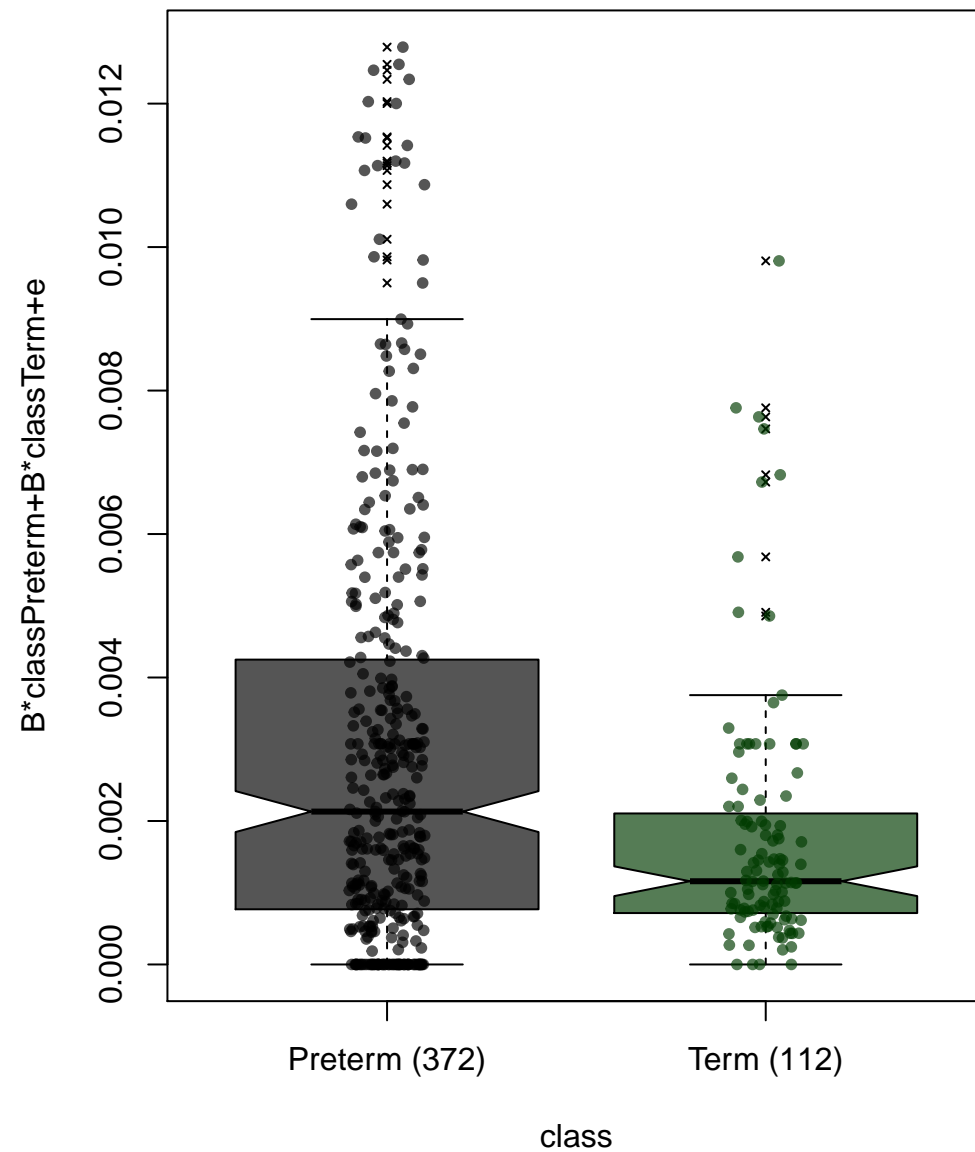

classTerm ( $-0.0061$  sd  $0.00151$ ,  $p=6.14e-05$ ,  $q=9.8e-05$ )

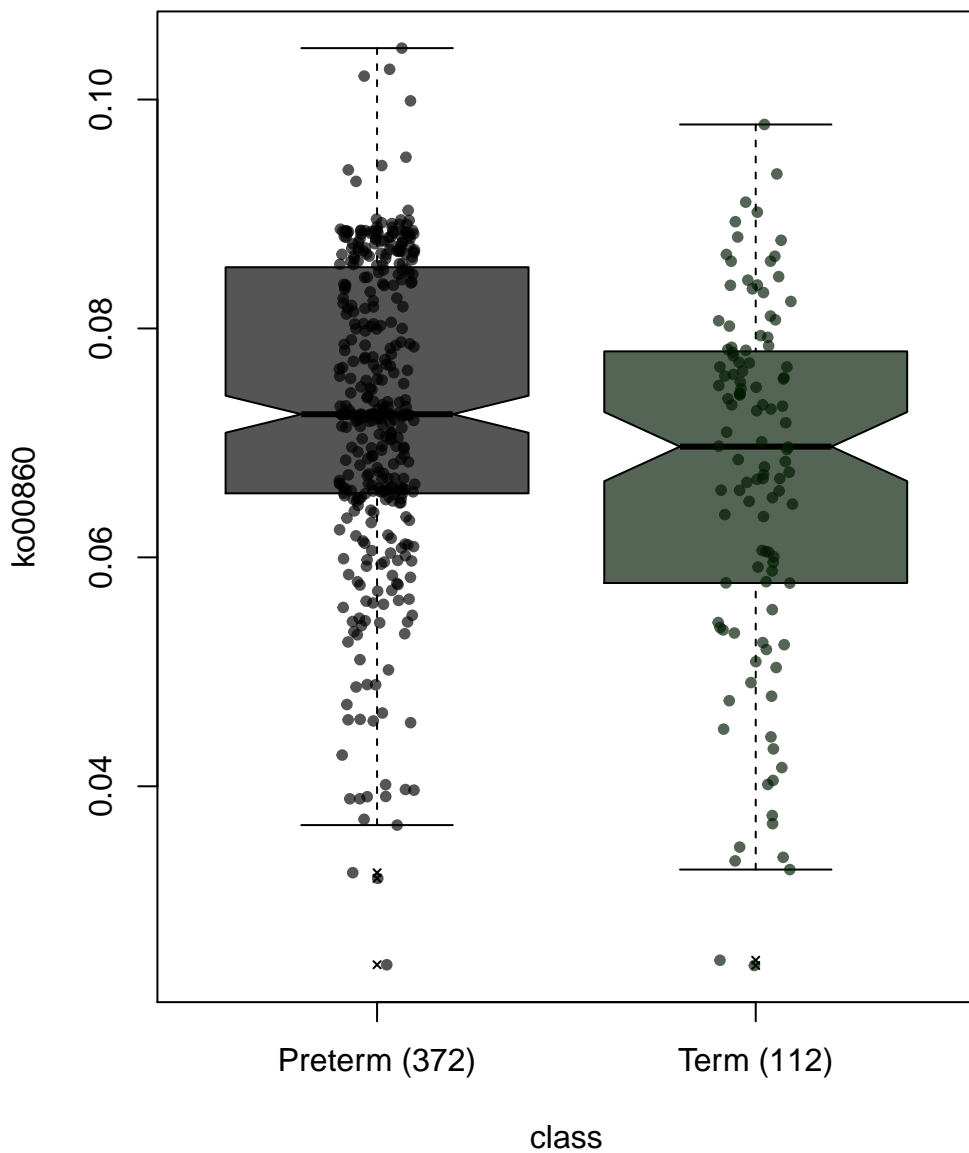

Partial Residual Plot

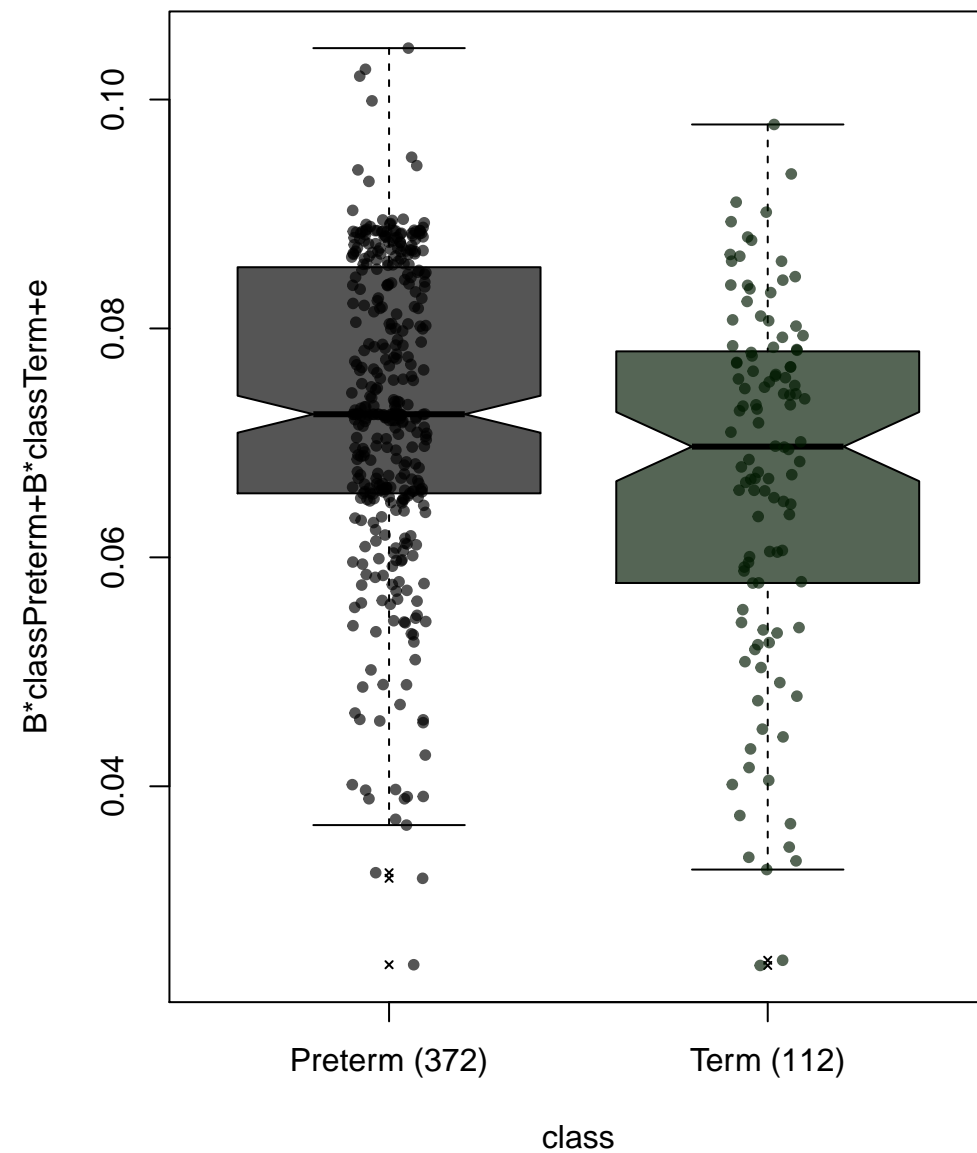

classTerm (0.00663 sd 0.00166, p=7.15e-05, q=0.000113)

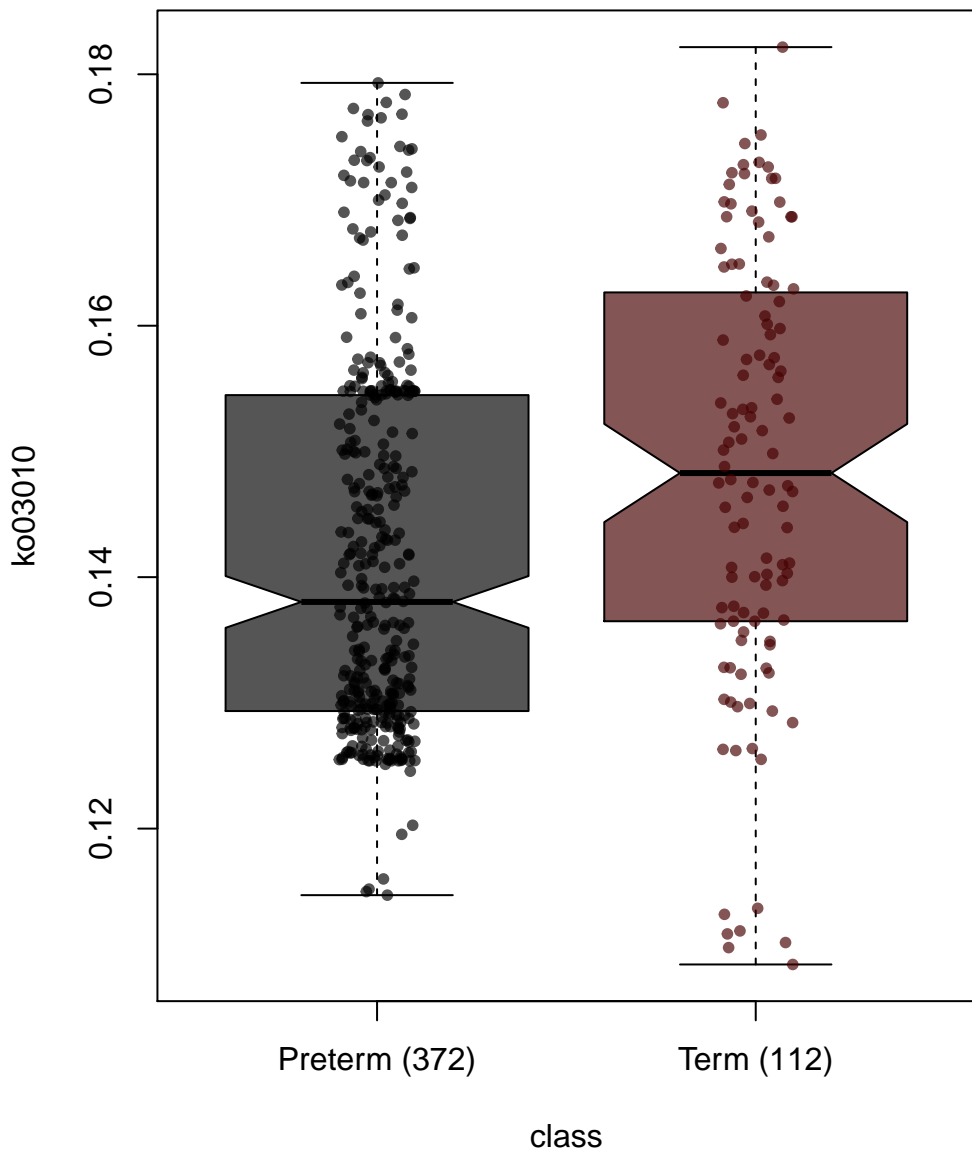

Partial Residual Plot

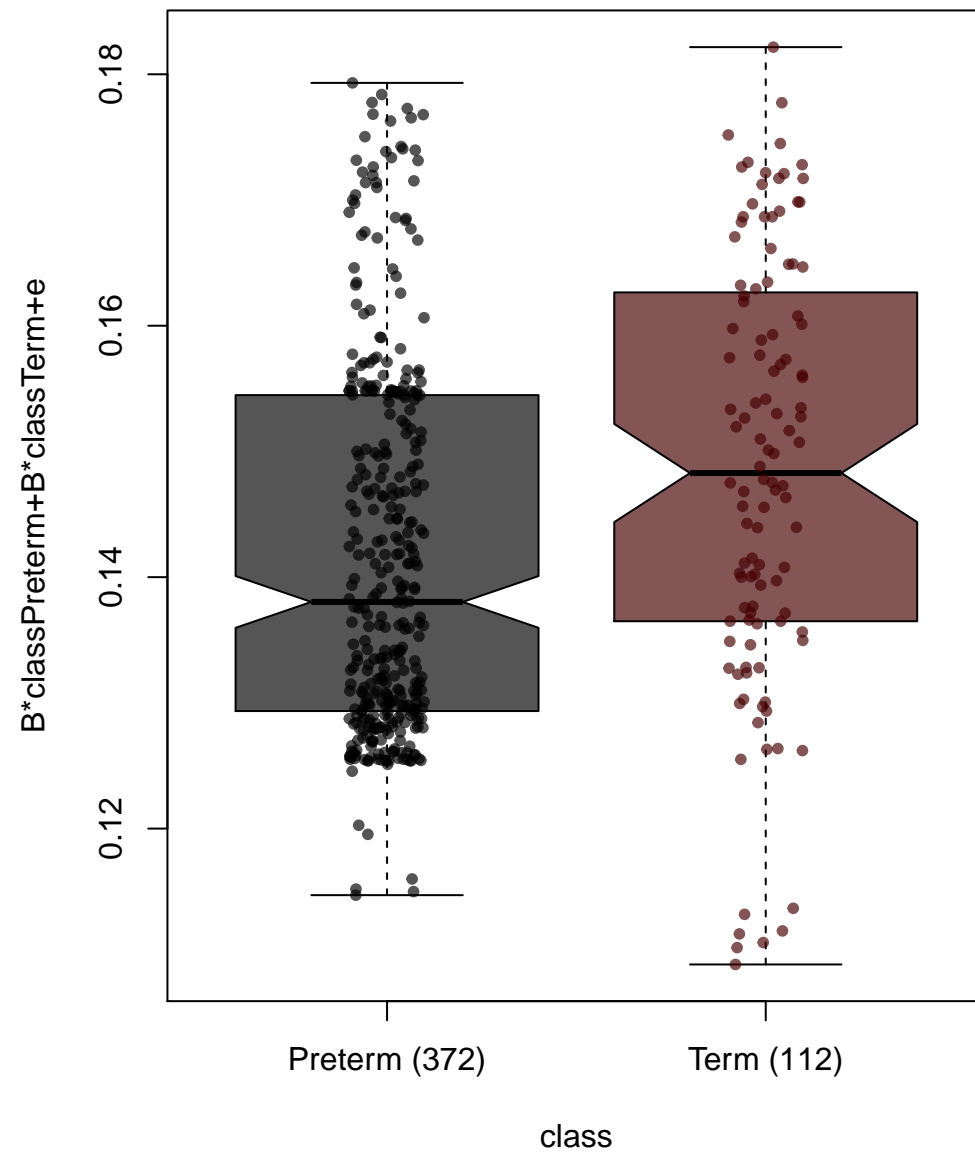

classTerm (0.0014 sd 0.00035, p=7.68e-05, q=0.000121)

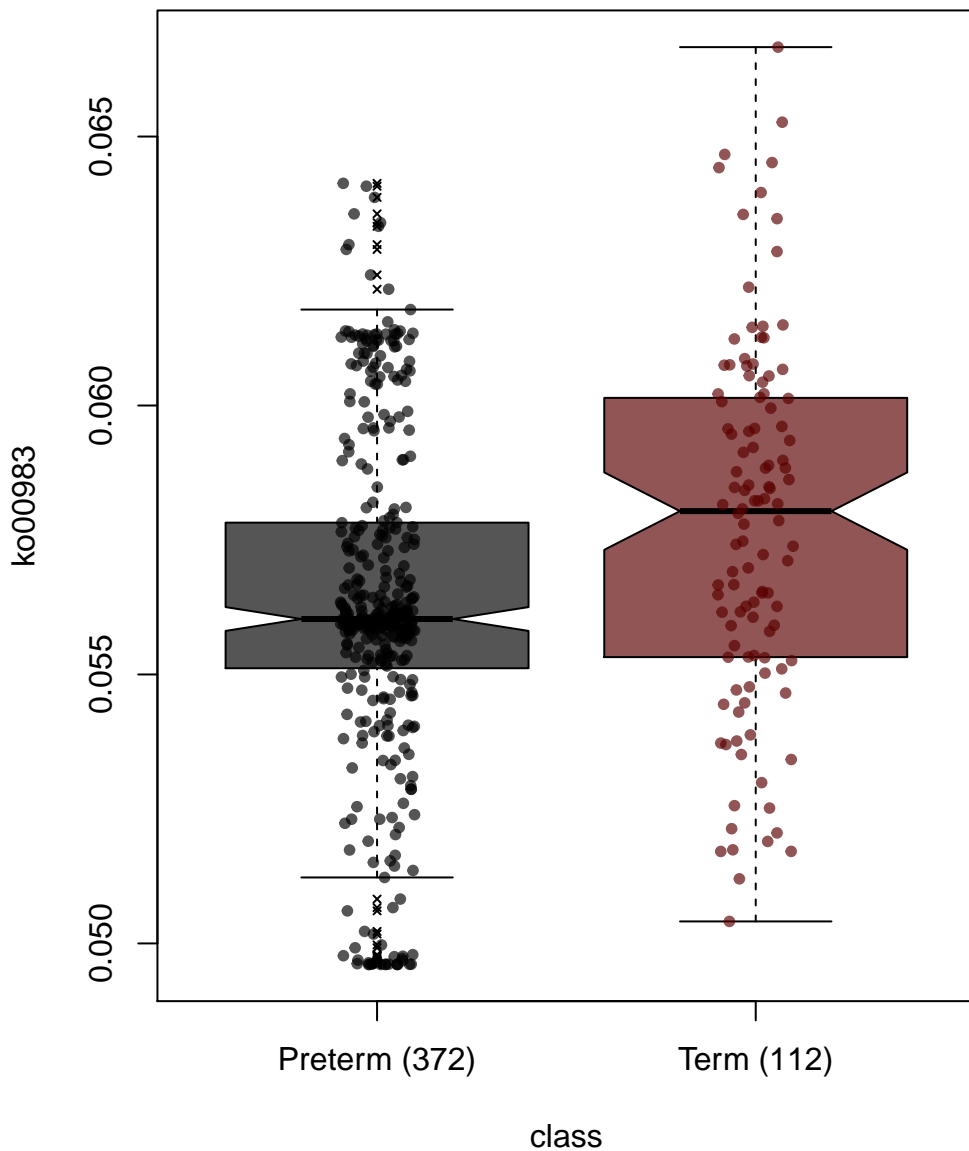

Partial Residual Plot

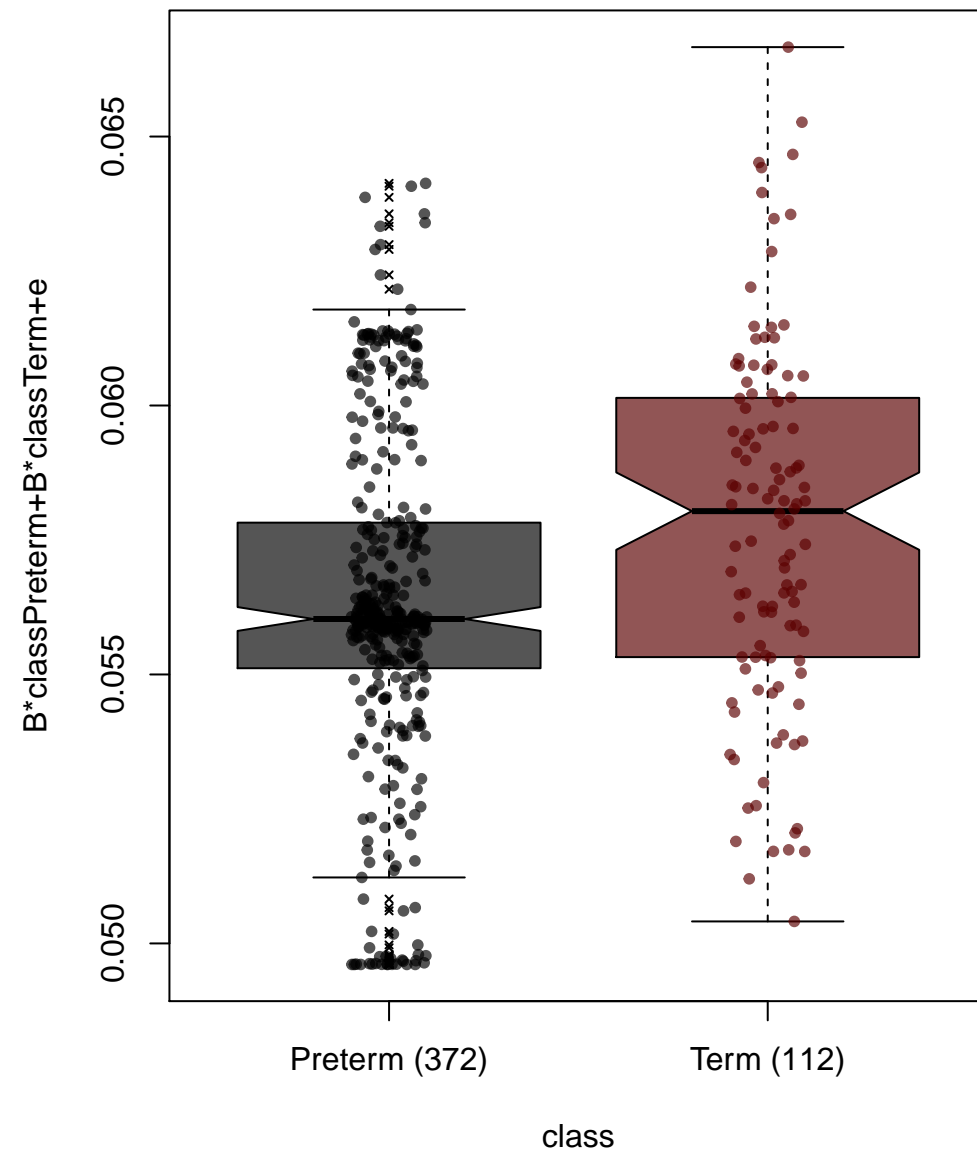

classTerm (0.00248 sd 0.000623, p=8.05e-05, q=0.000126)

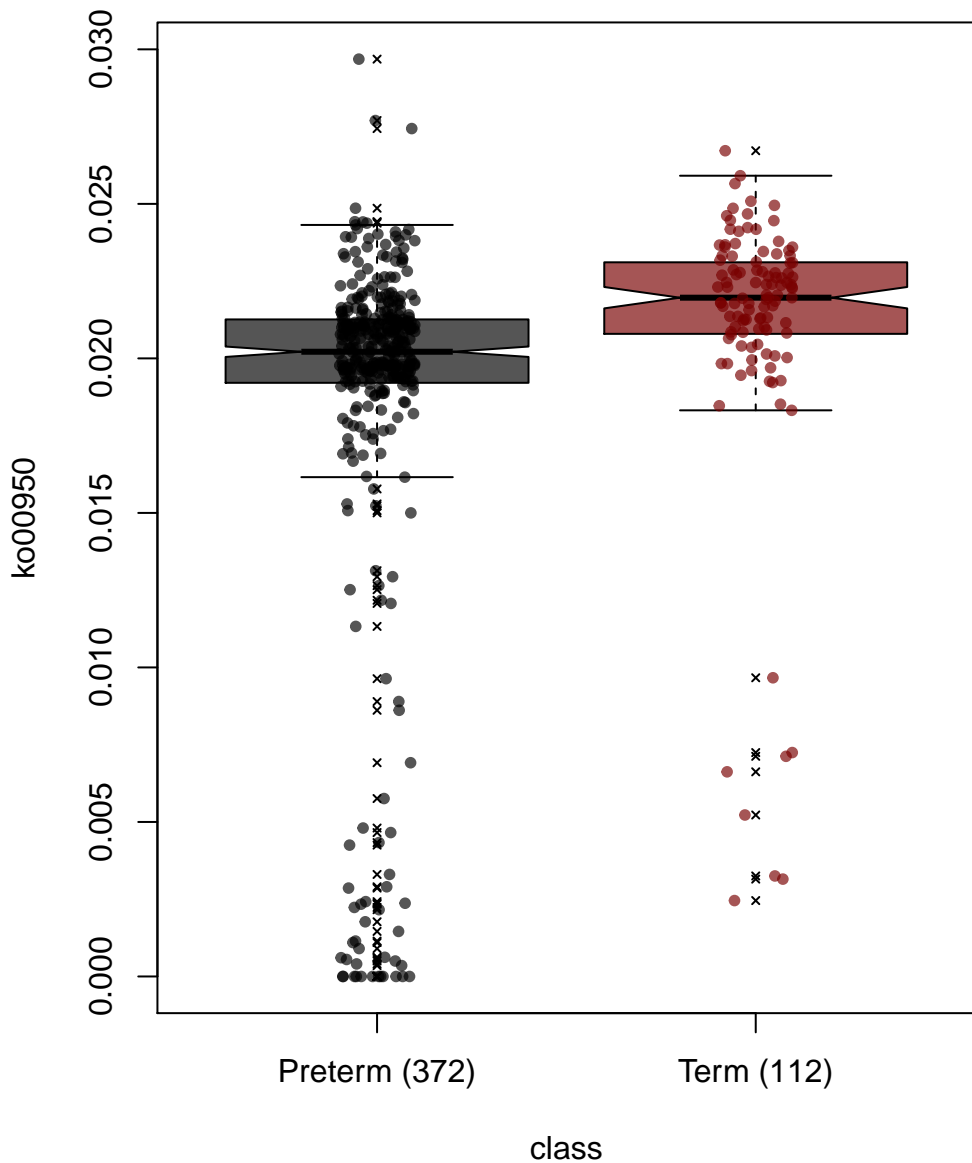

Partial Residual Plot

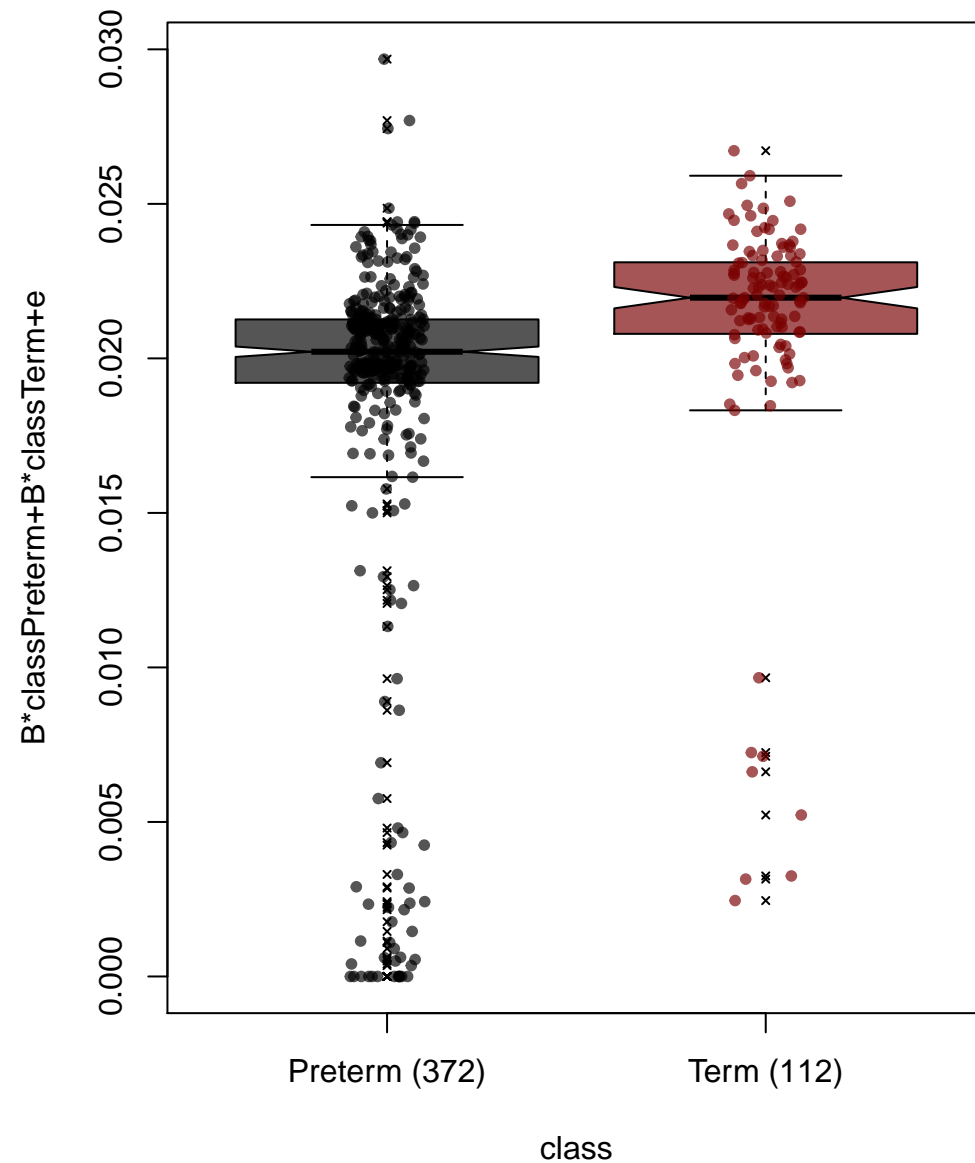

classTerm (−0.000884 sd 0.000226, p=0.000102, q=0.000159)

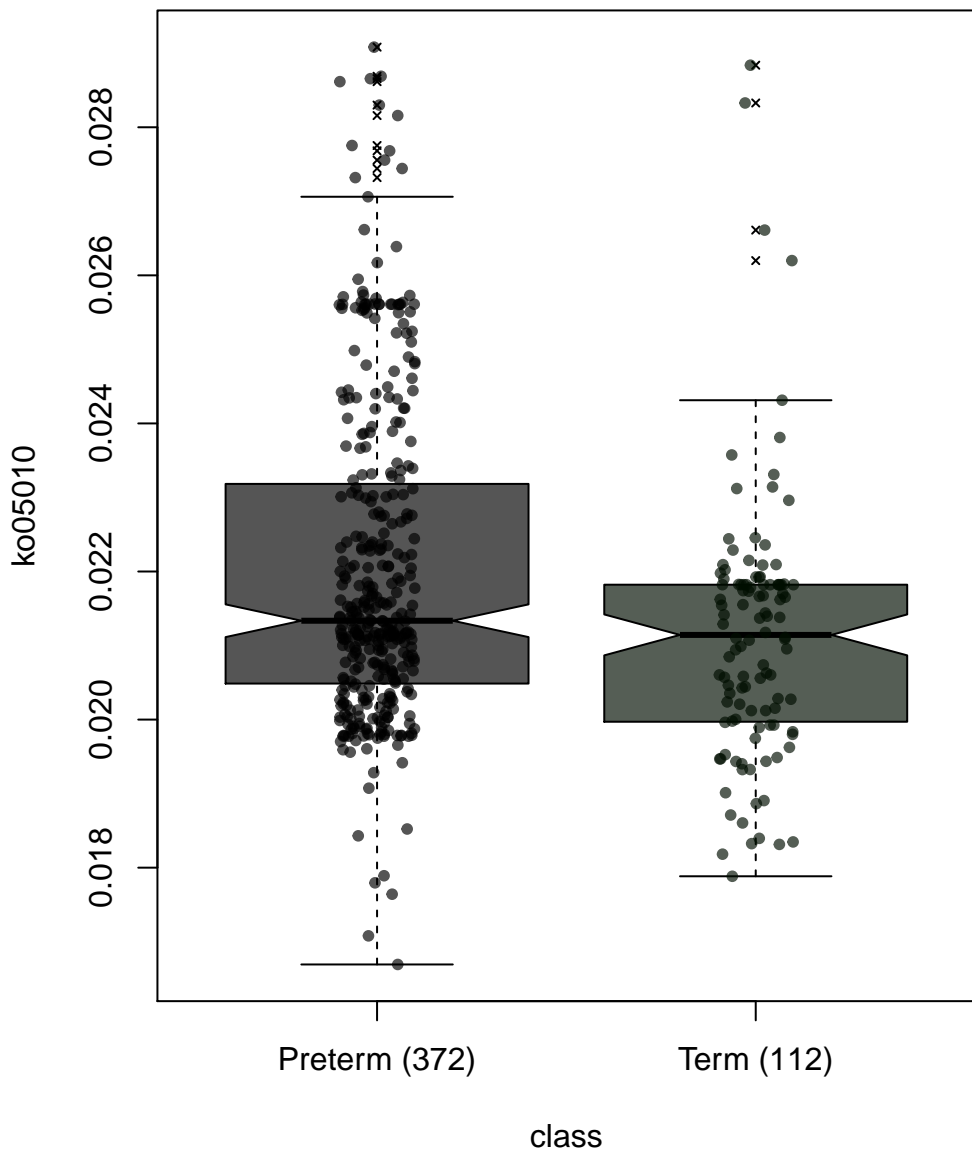

Partial Residual Plot

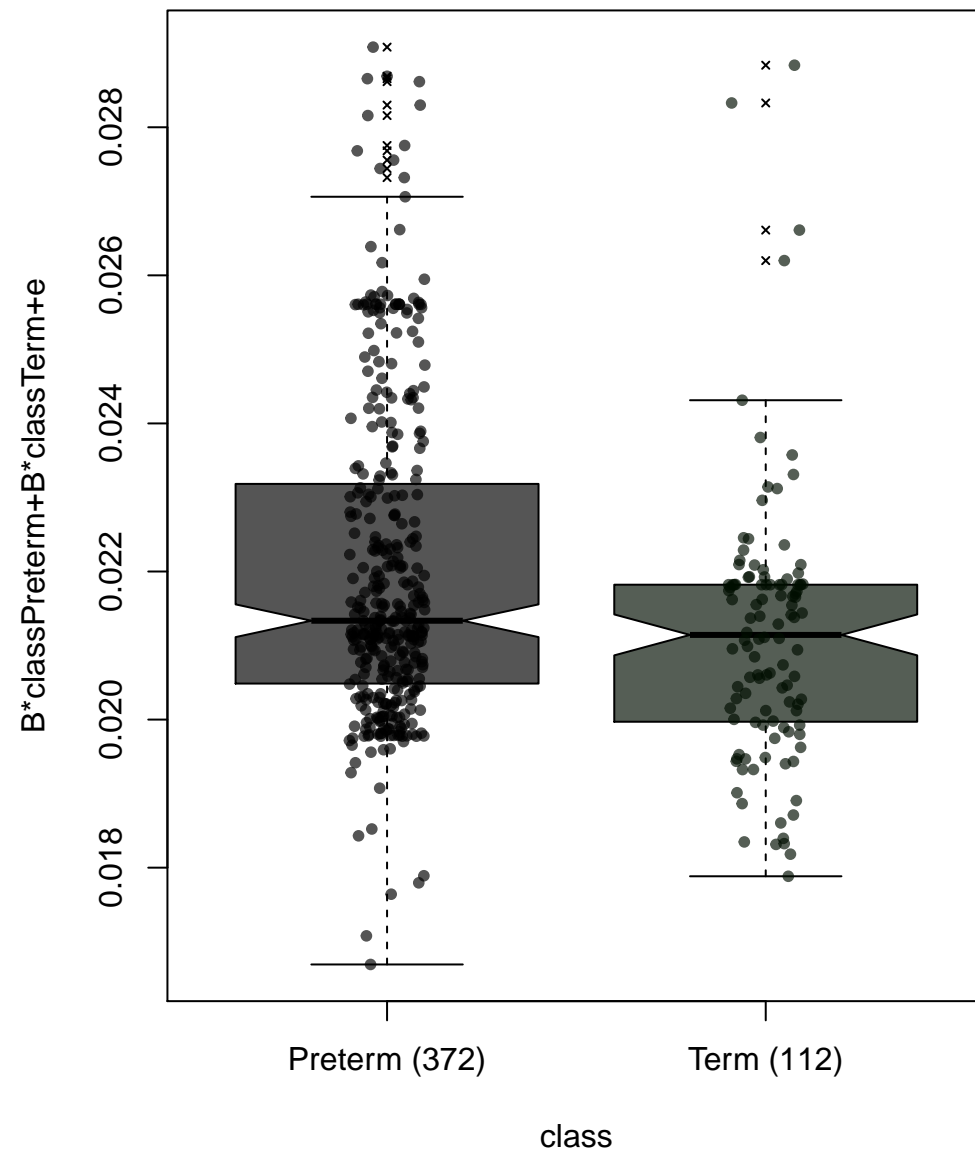



classTerm (−0.00691 sd 0.00178, p=0.00012, q=0.000186)

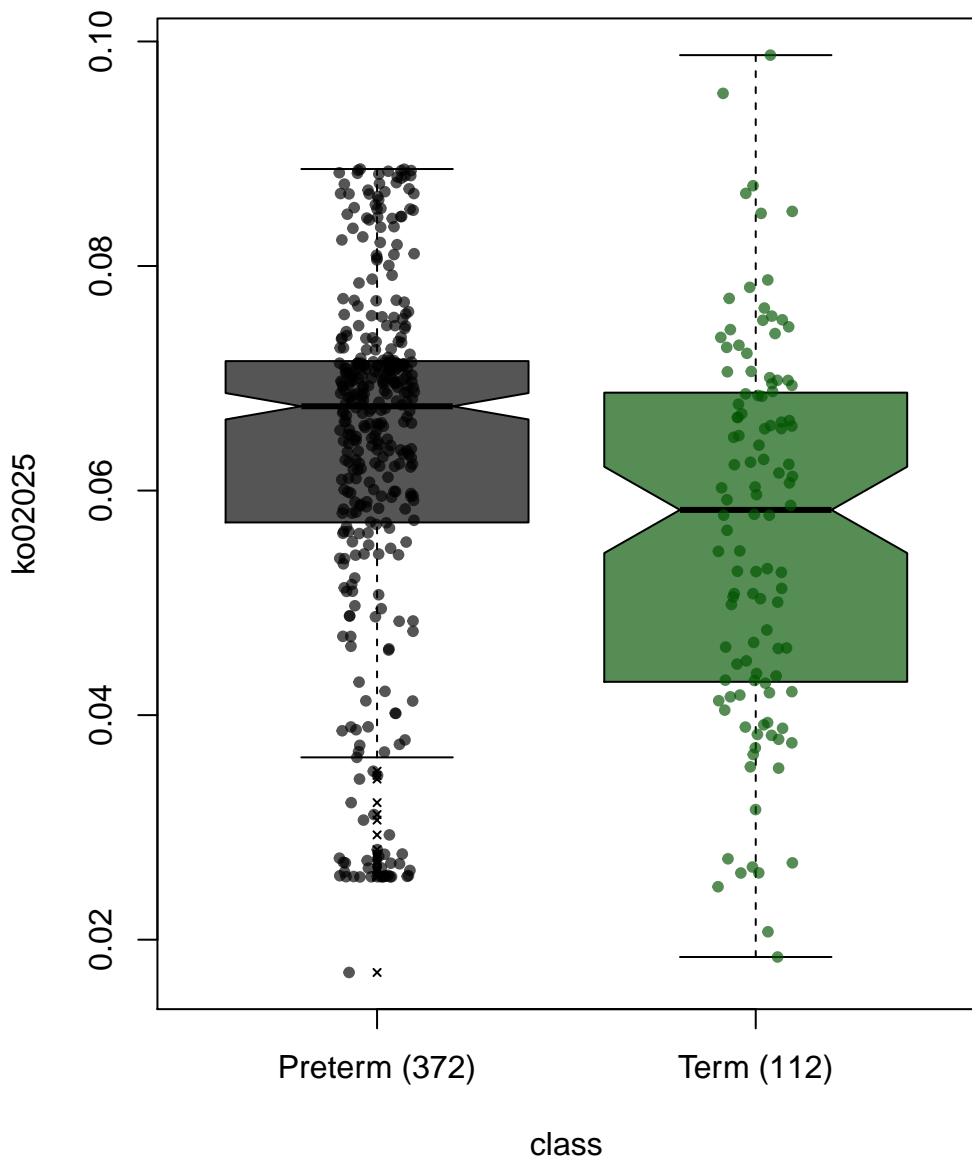

Partial Residual Plot

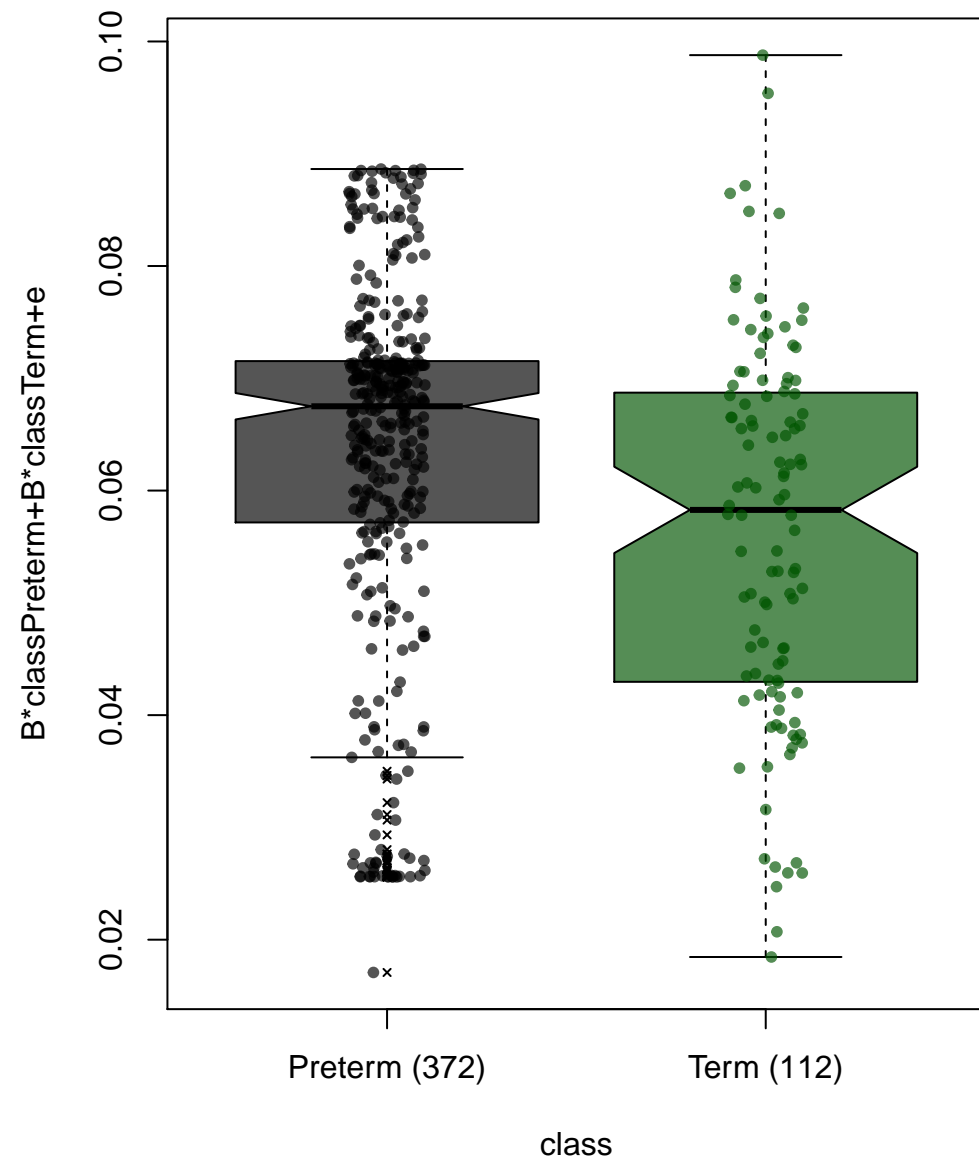

classTerm (-0.00289 sd 0.000747, p=0.000125, q=0.000193)

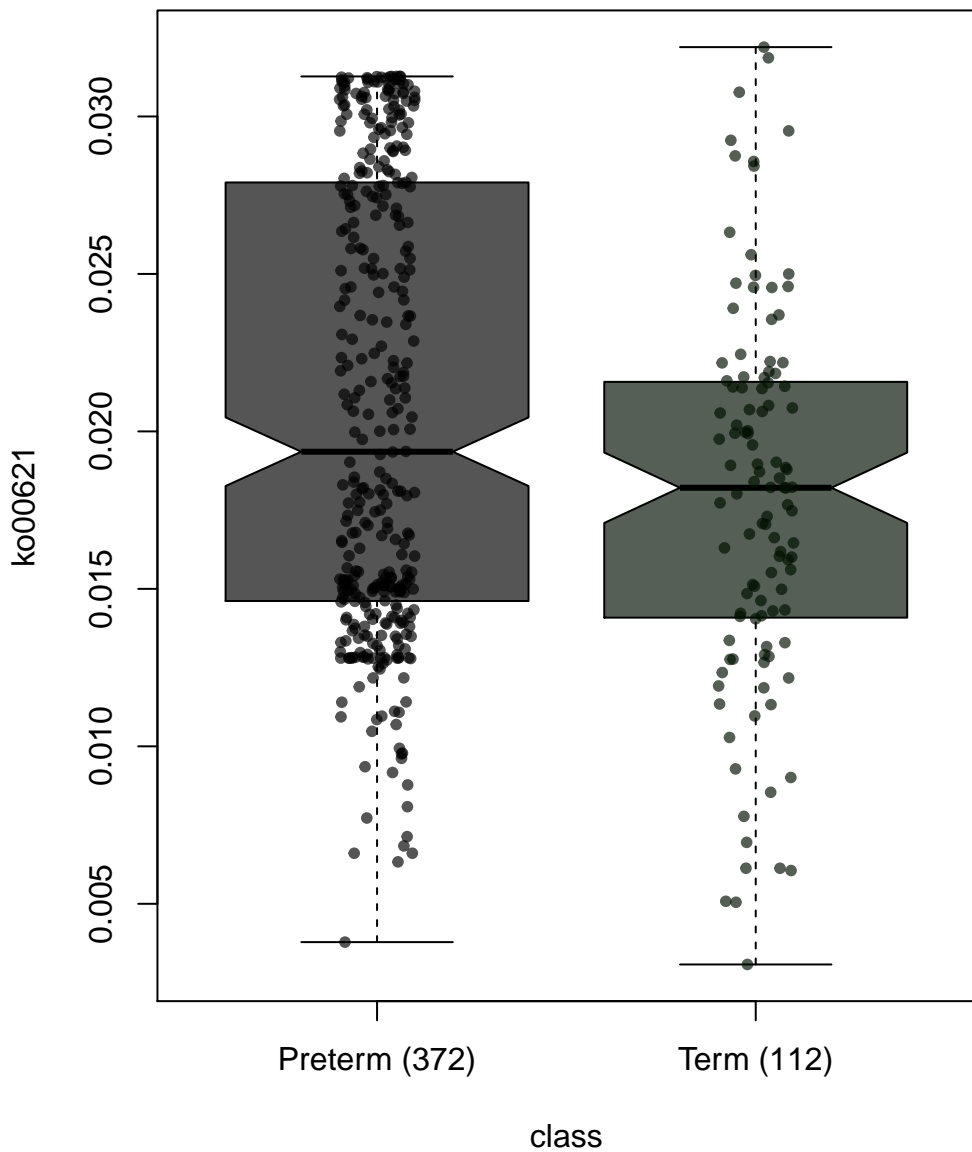

Partial Residual Plot

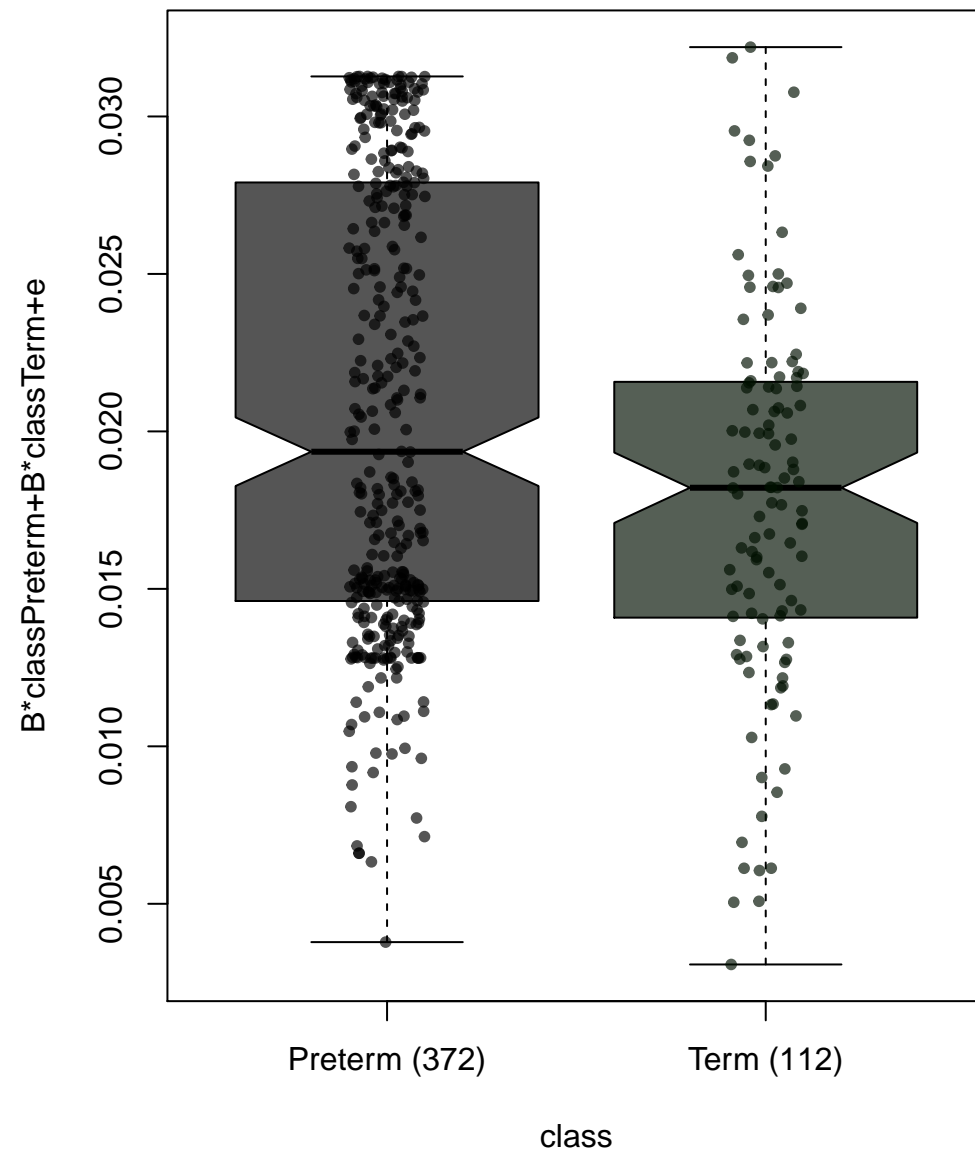

classTerm (−0.00282 sd 0.000735, p=0.000143, q=0.000219)

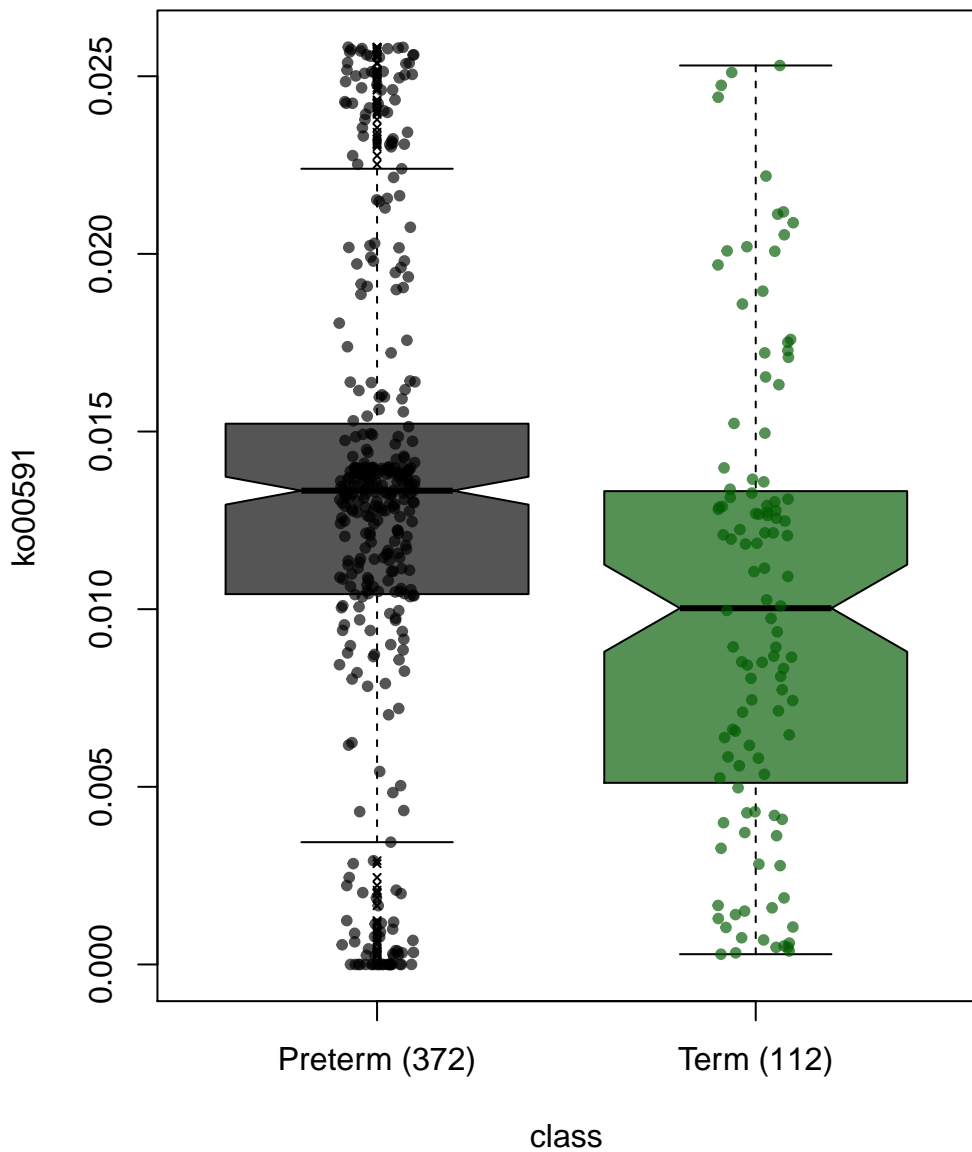

Partial Residual Plot

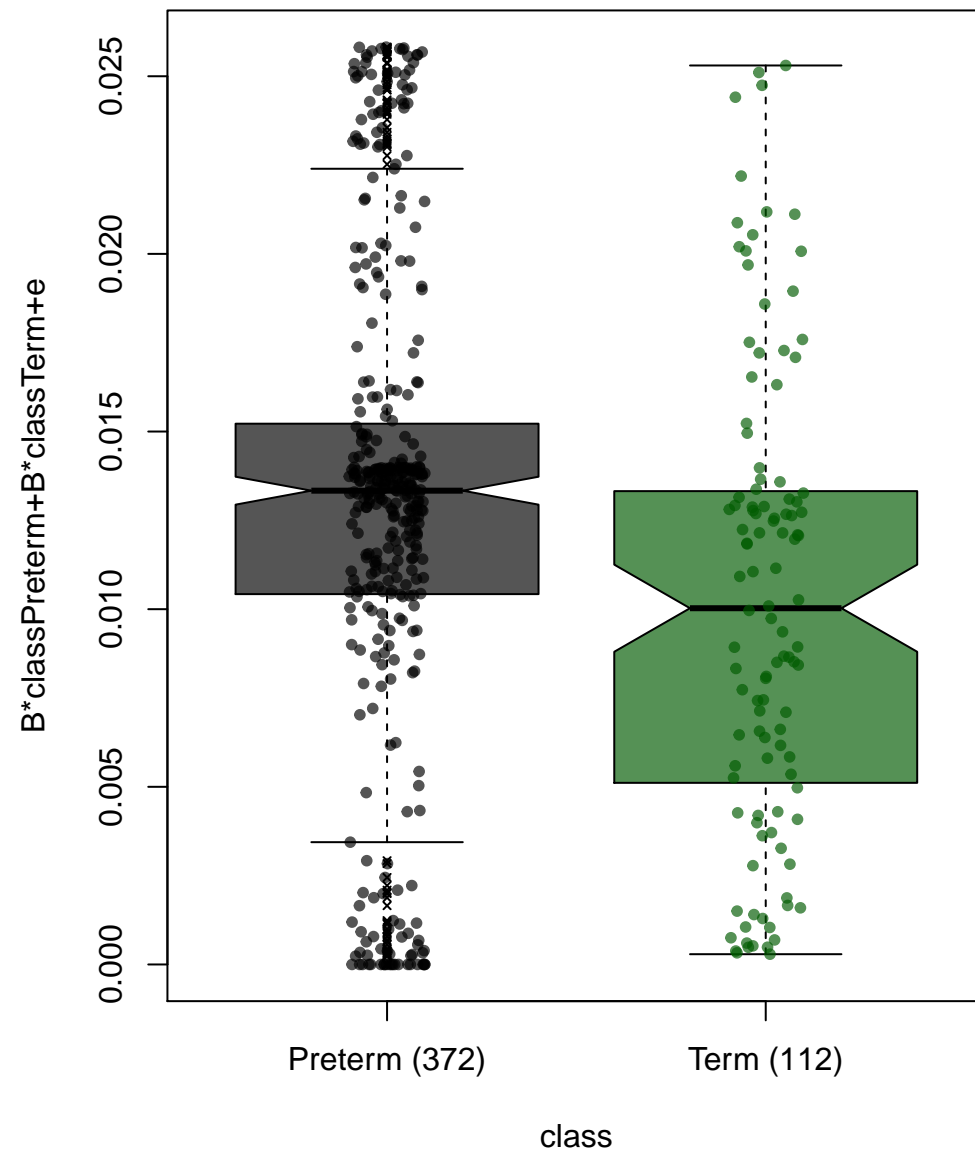

classTerm ( $-0.00387$  sd  $0.00103$ ,  $p=0.000185$ ,  $q=0.000281$ )

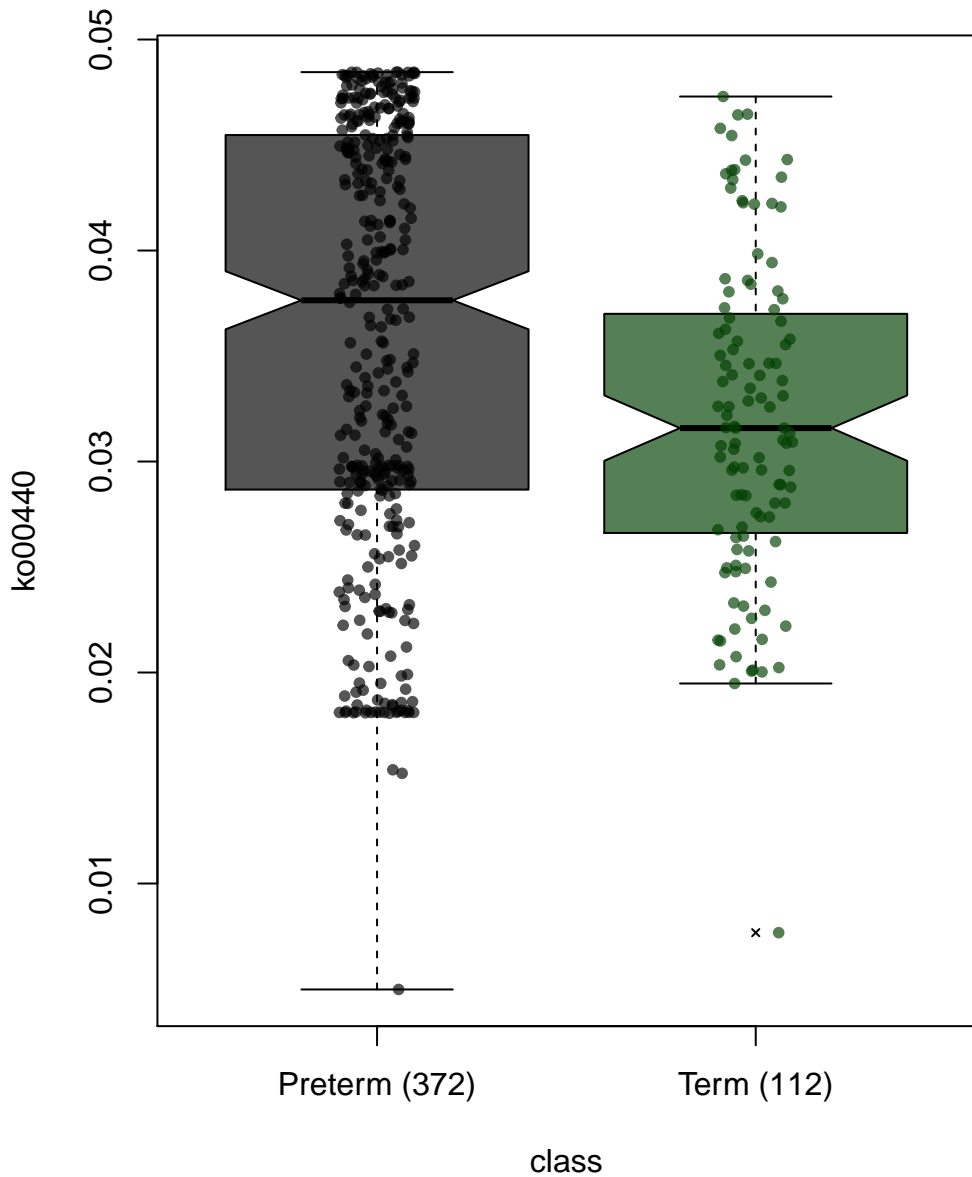

Partial Residual Plot

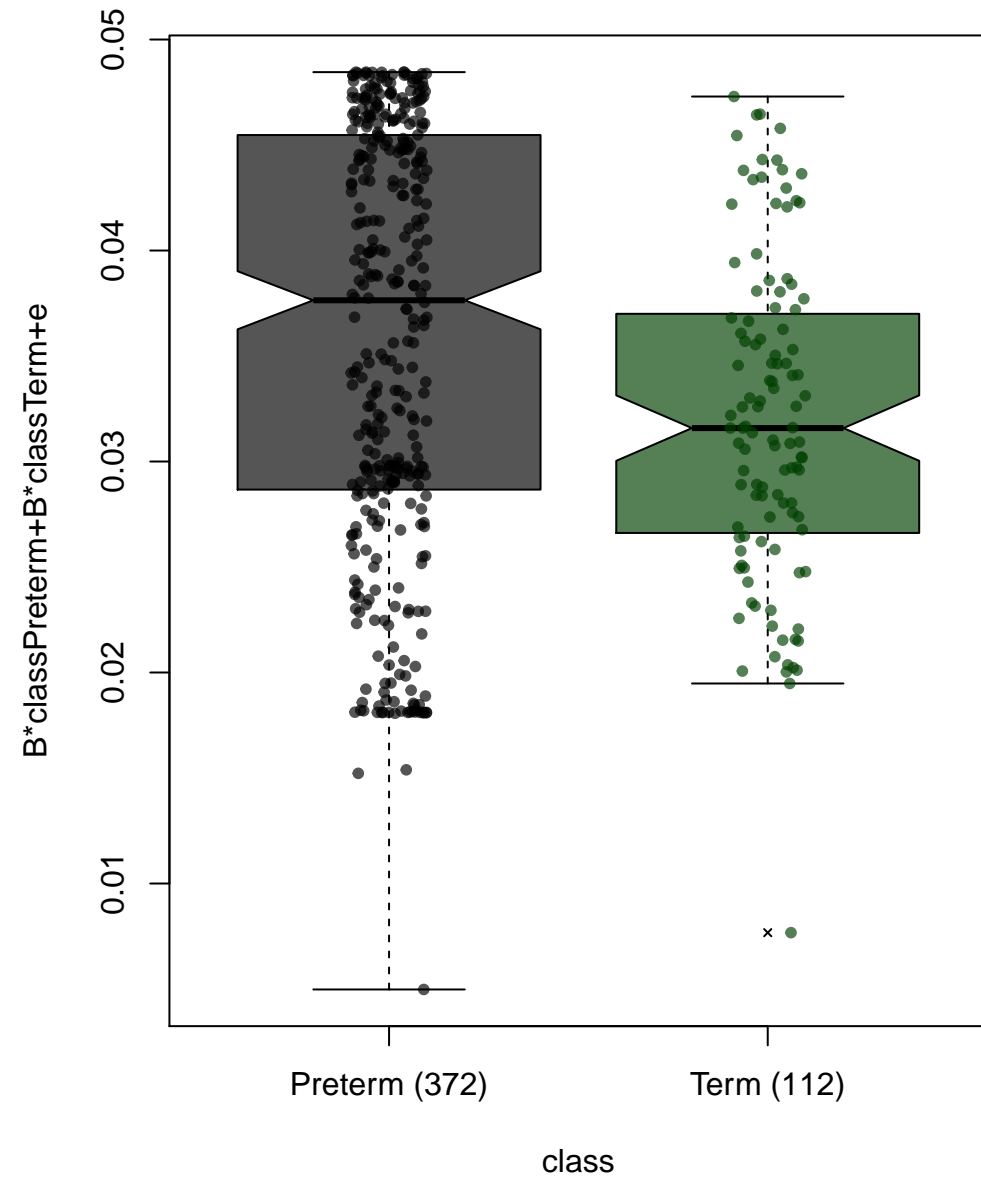

classTerm (0.00189 sd 0.000501, p=0.000186, q=0.000281)

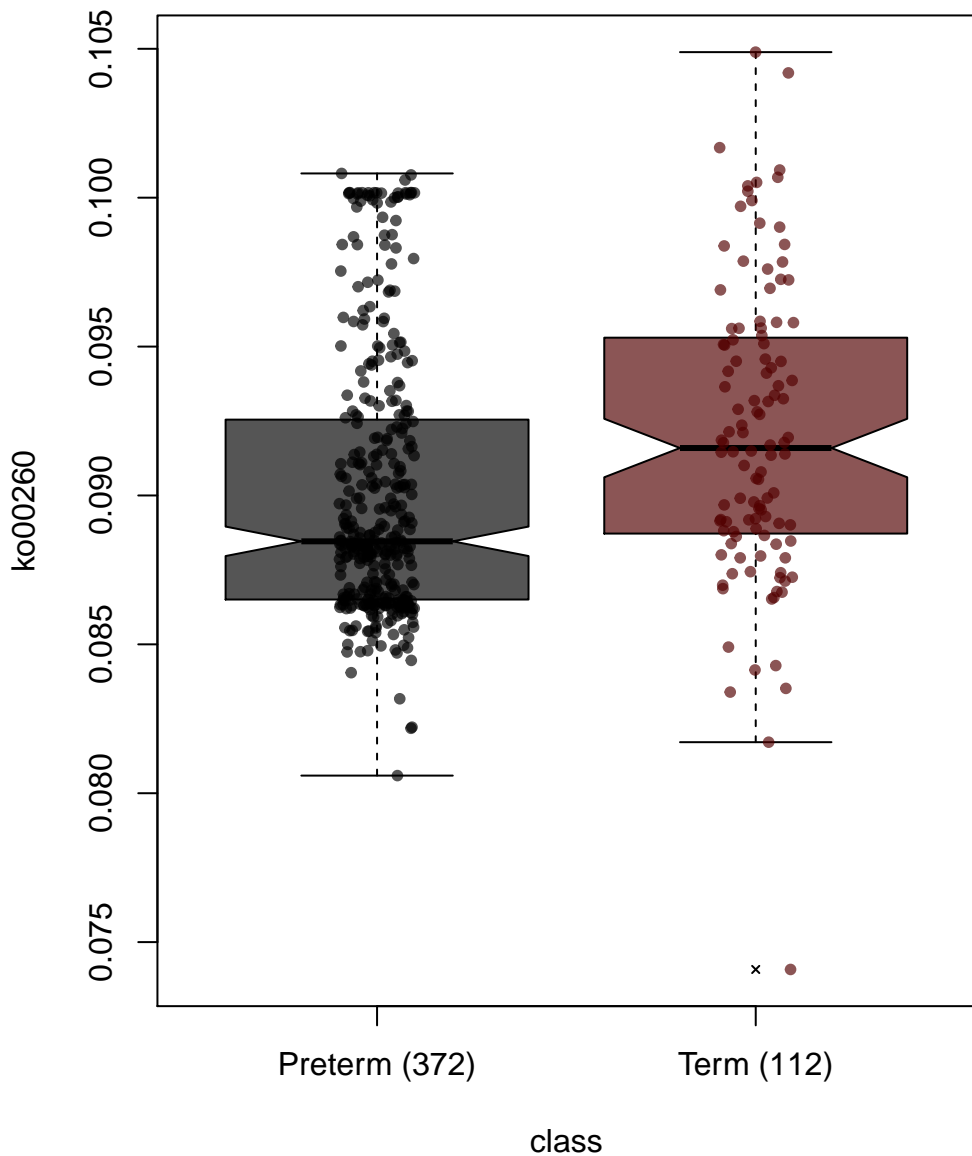

Partial Residual Plot

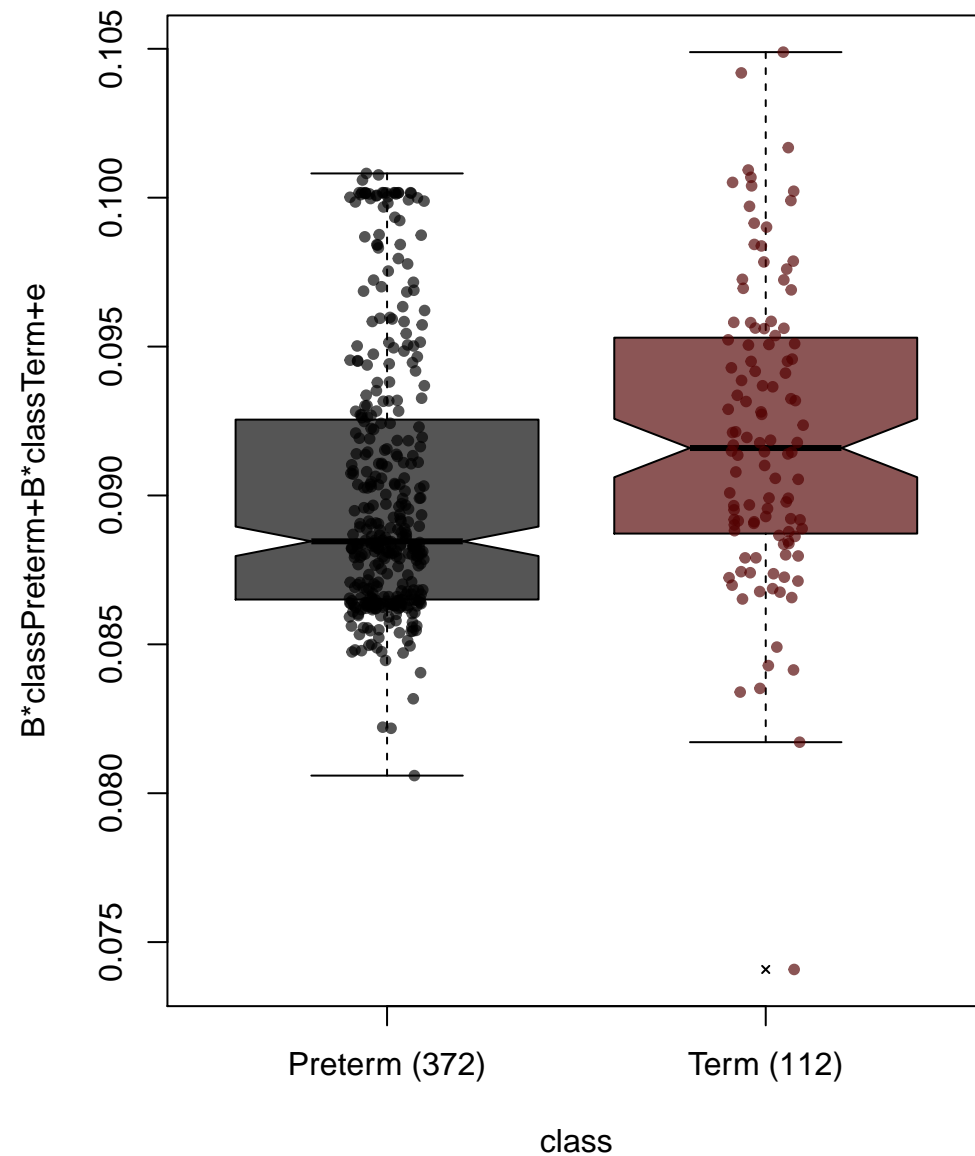

classTerm (−0.00196 sd 0.000523, p=0.000204, q=0.000308)

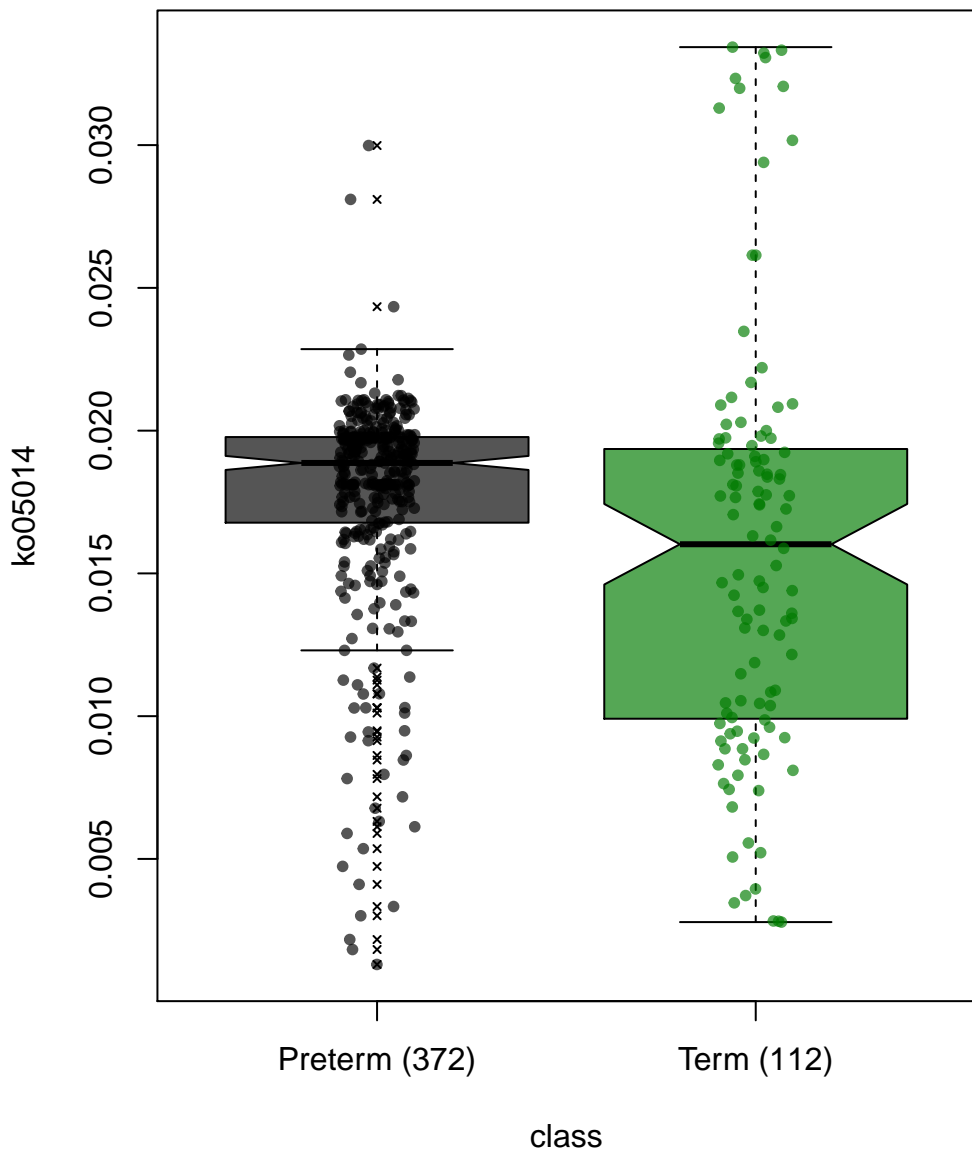

Partial Residual Plot

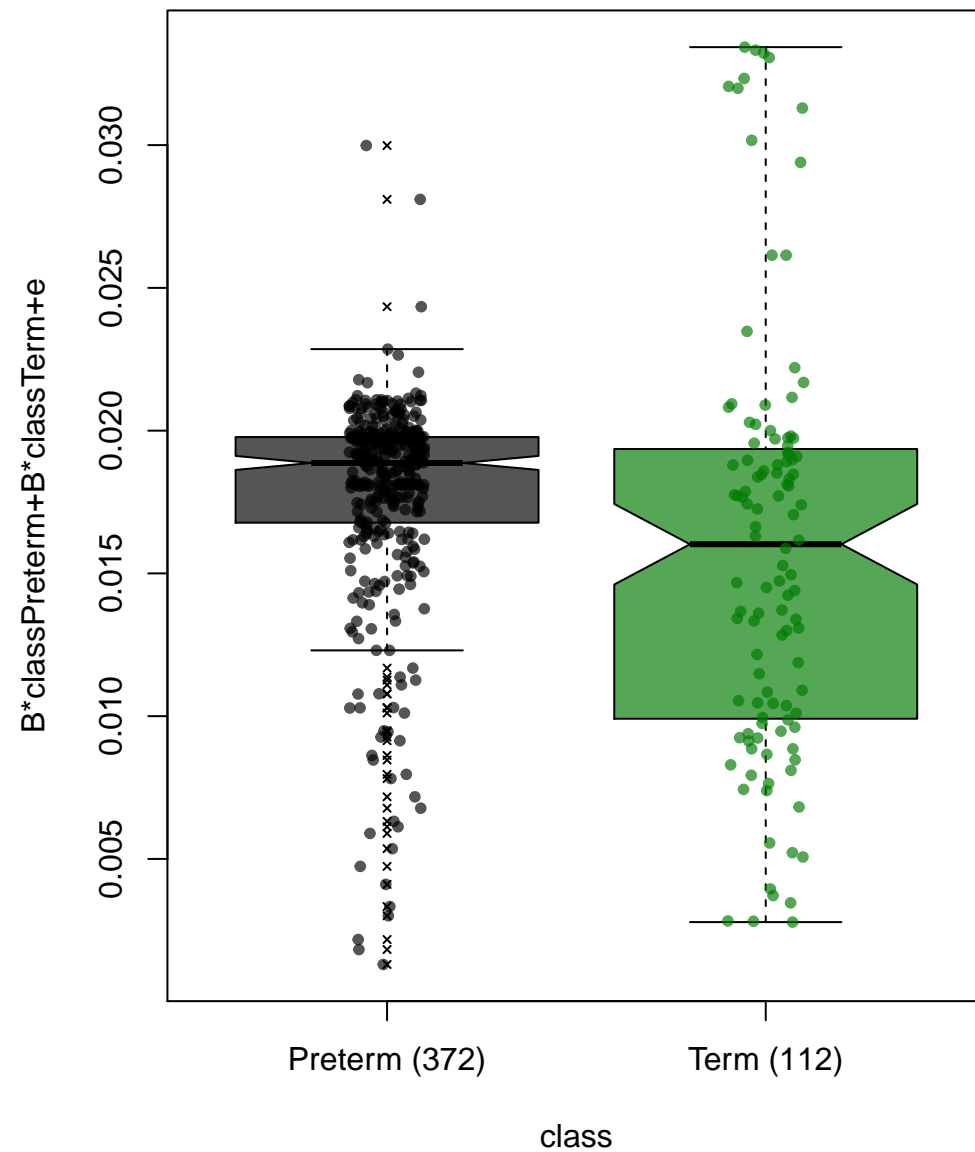

classTerm (-0.00209 sd 0.000571, p=0.000285, q=0.000427)

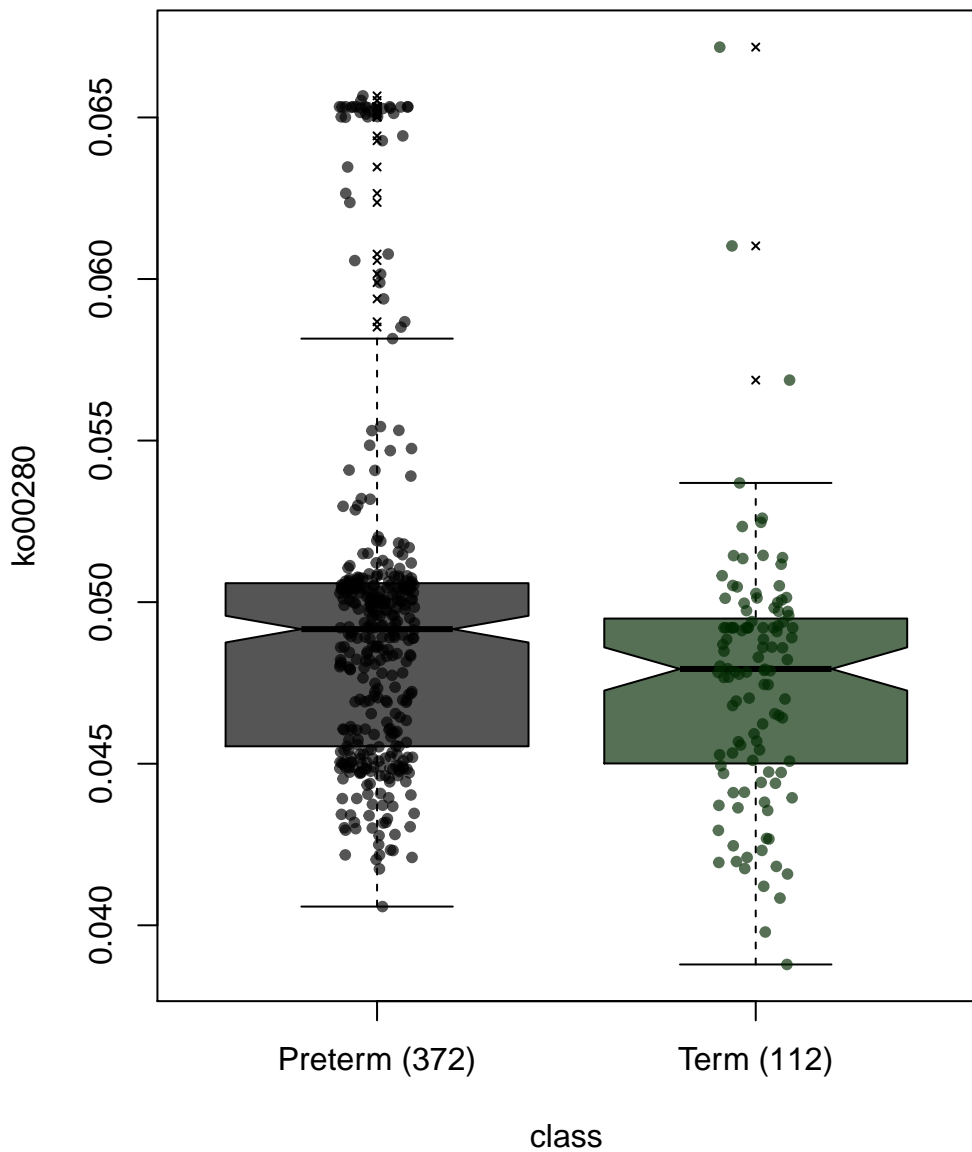

Partial Residual Plot

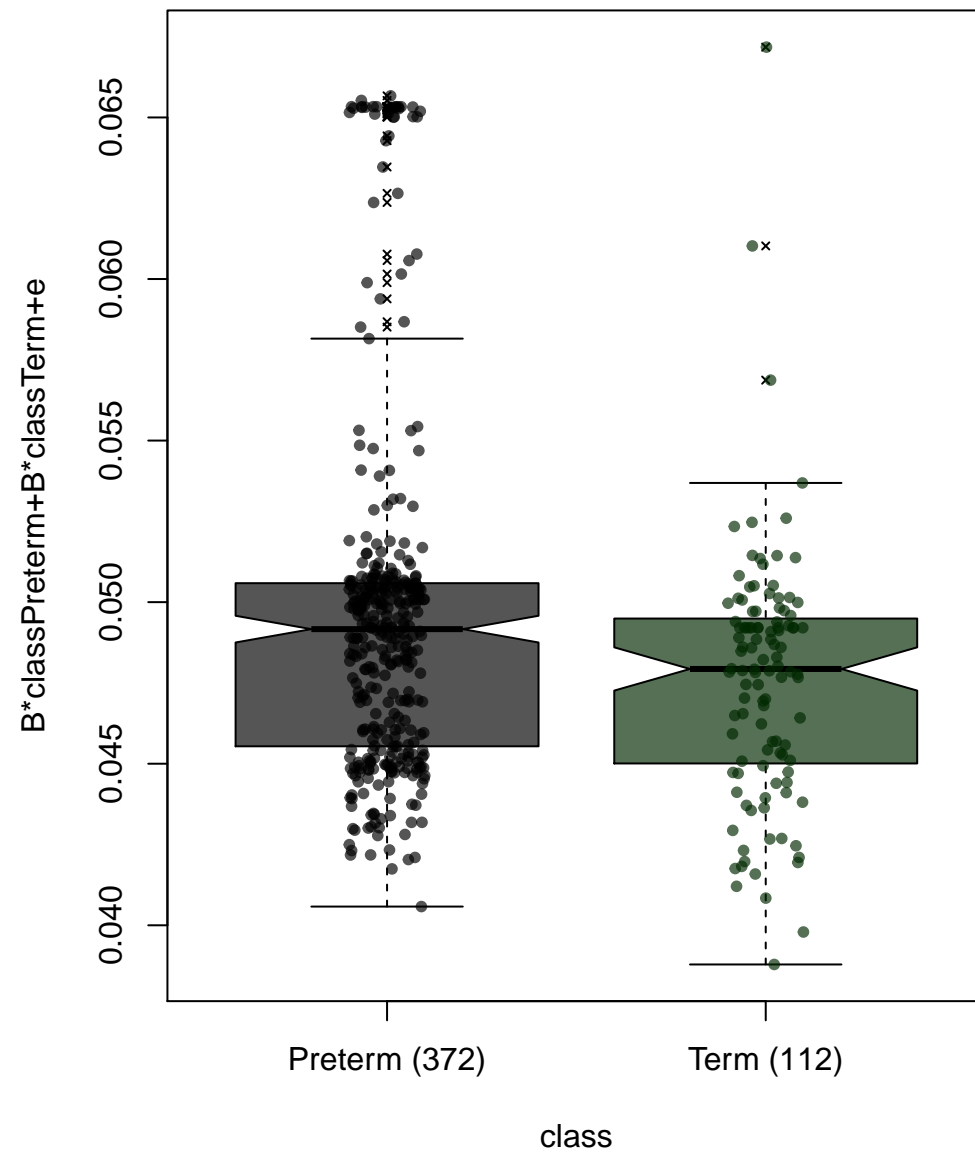

classTerm (-0.00144 sd 0.000396, p=0.000306, q=0.000456)

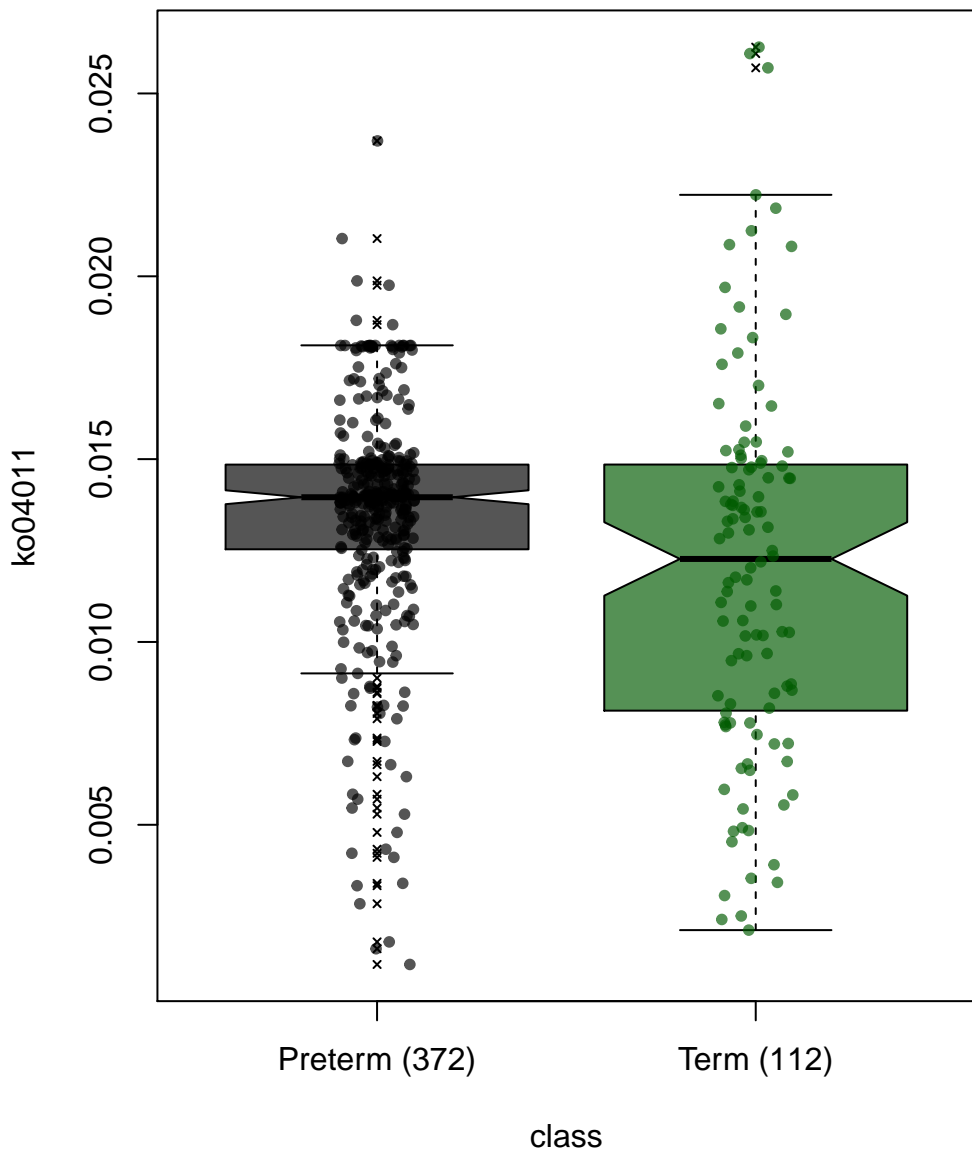

Partial Residual Plot

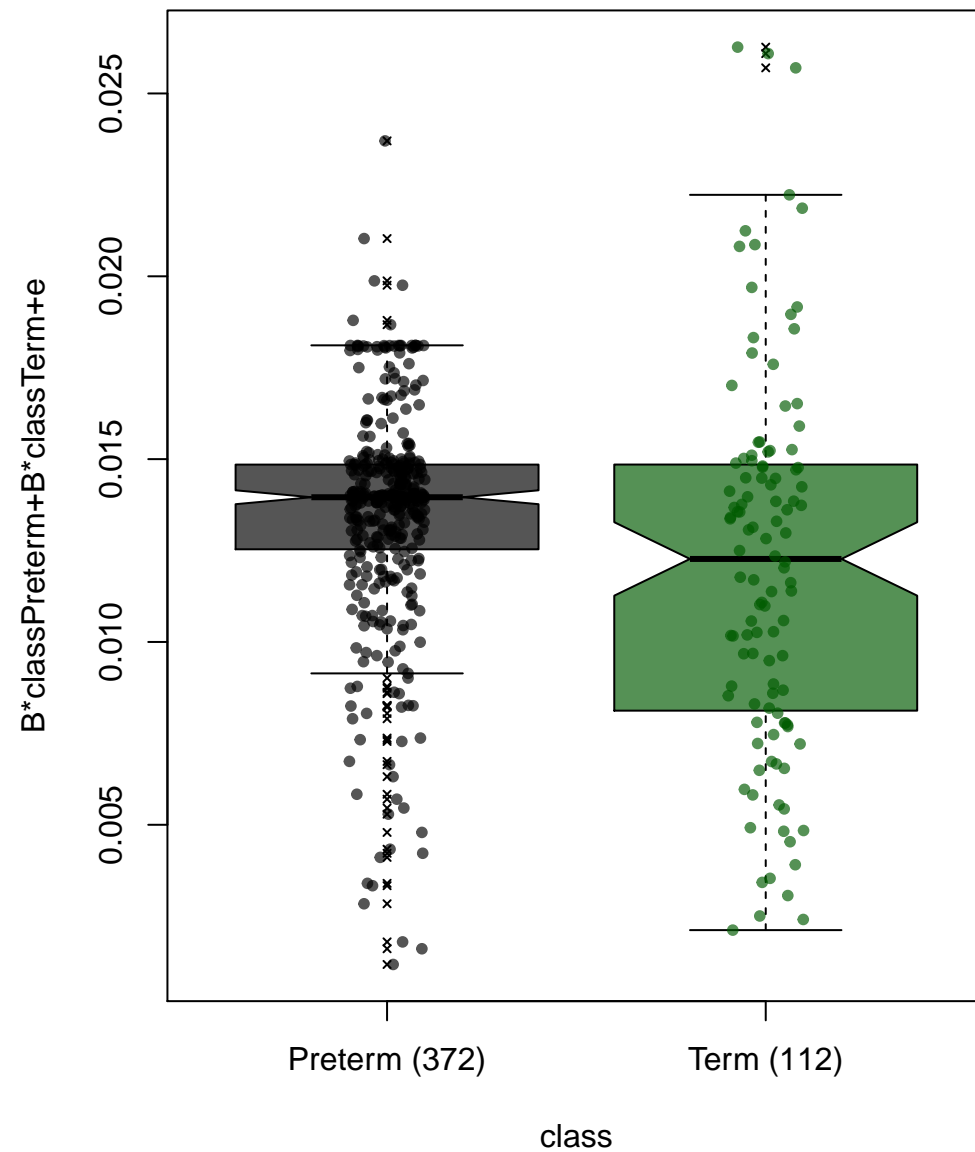



classTerm (0.00152 sd 0.000423, p=0.000364, q=0.00054)

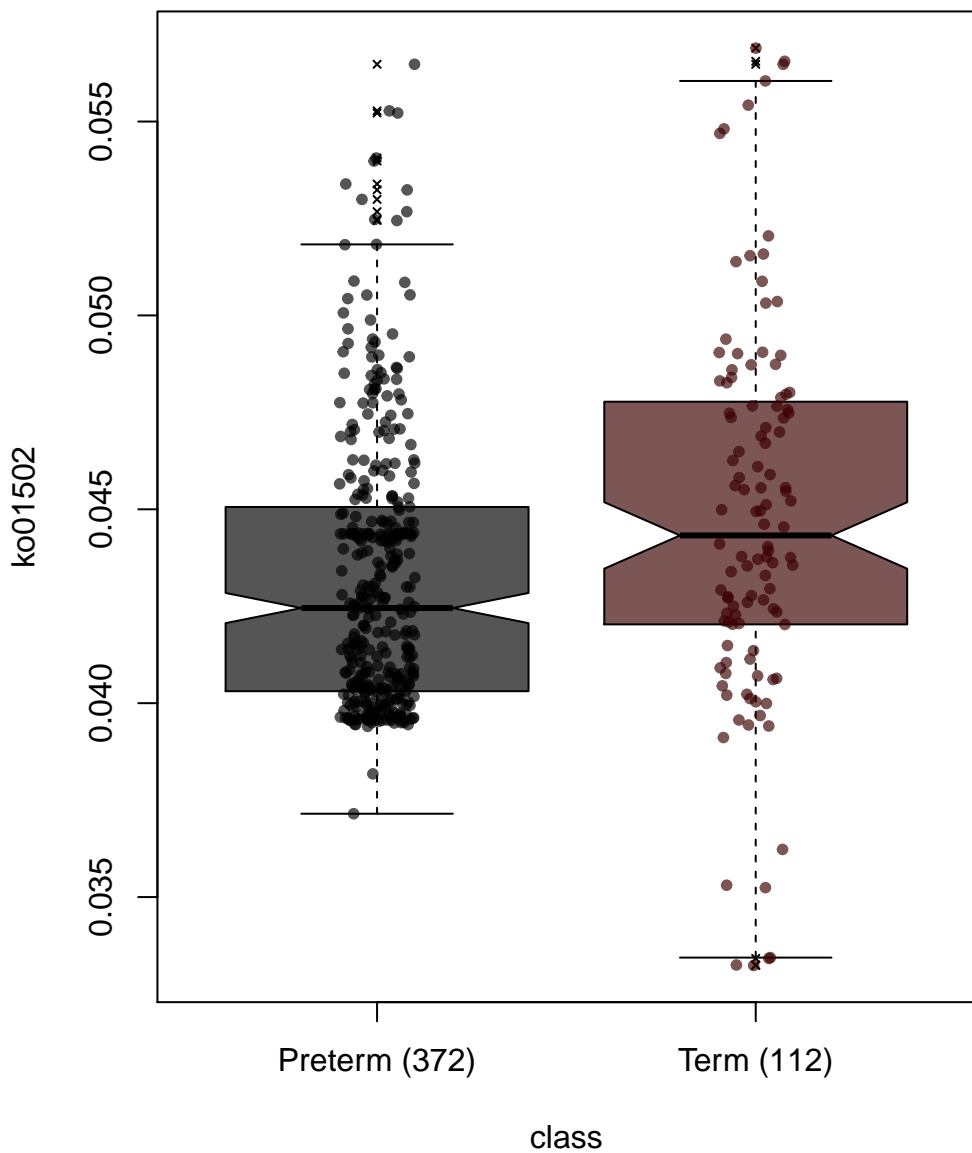

Partial Residual Plot

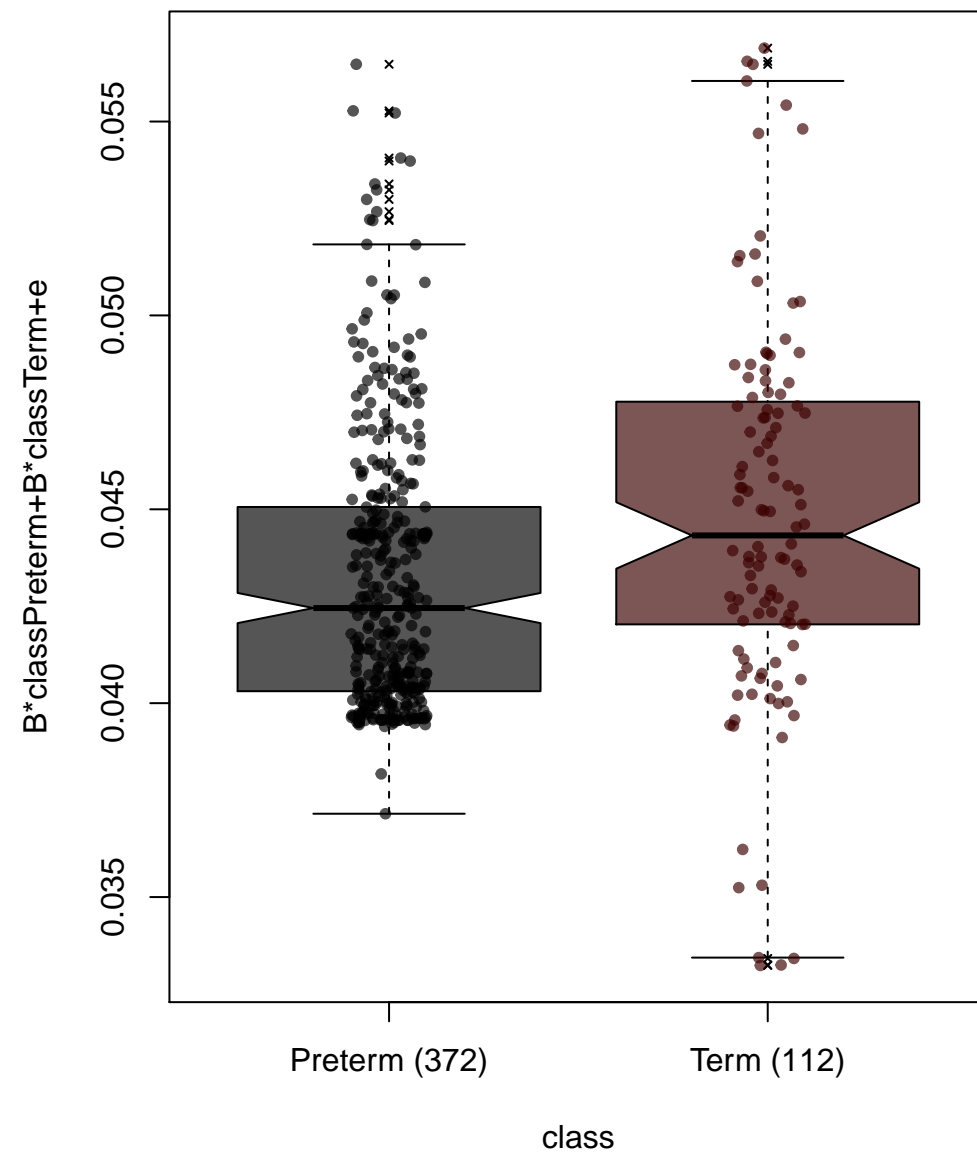

classTerm (0.00226 sd 0.000644, p=0.000498, q=0.000735)

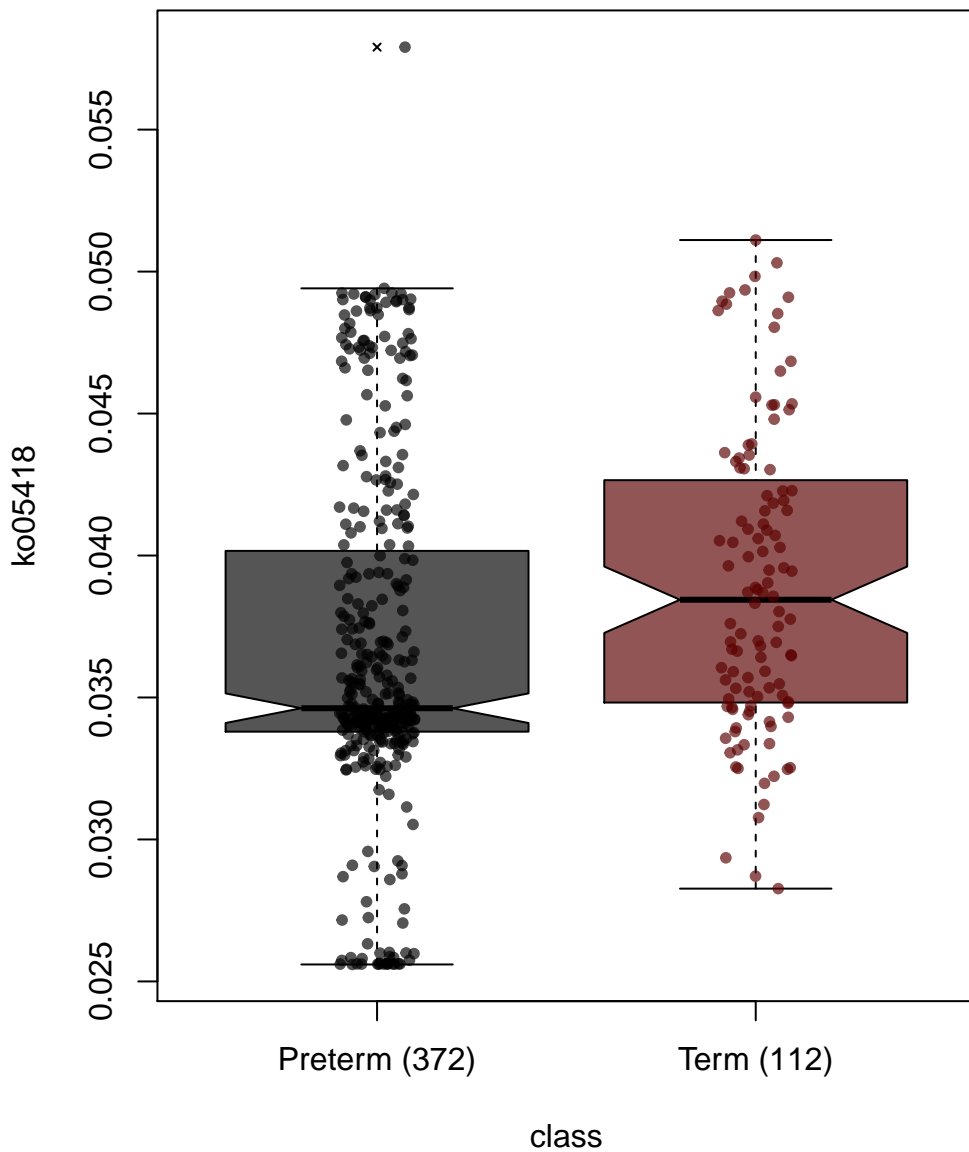

Partial Residual Plot

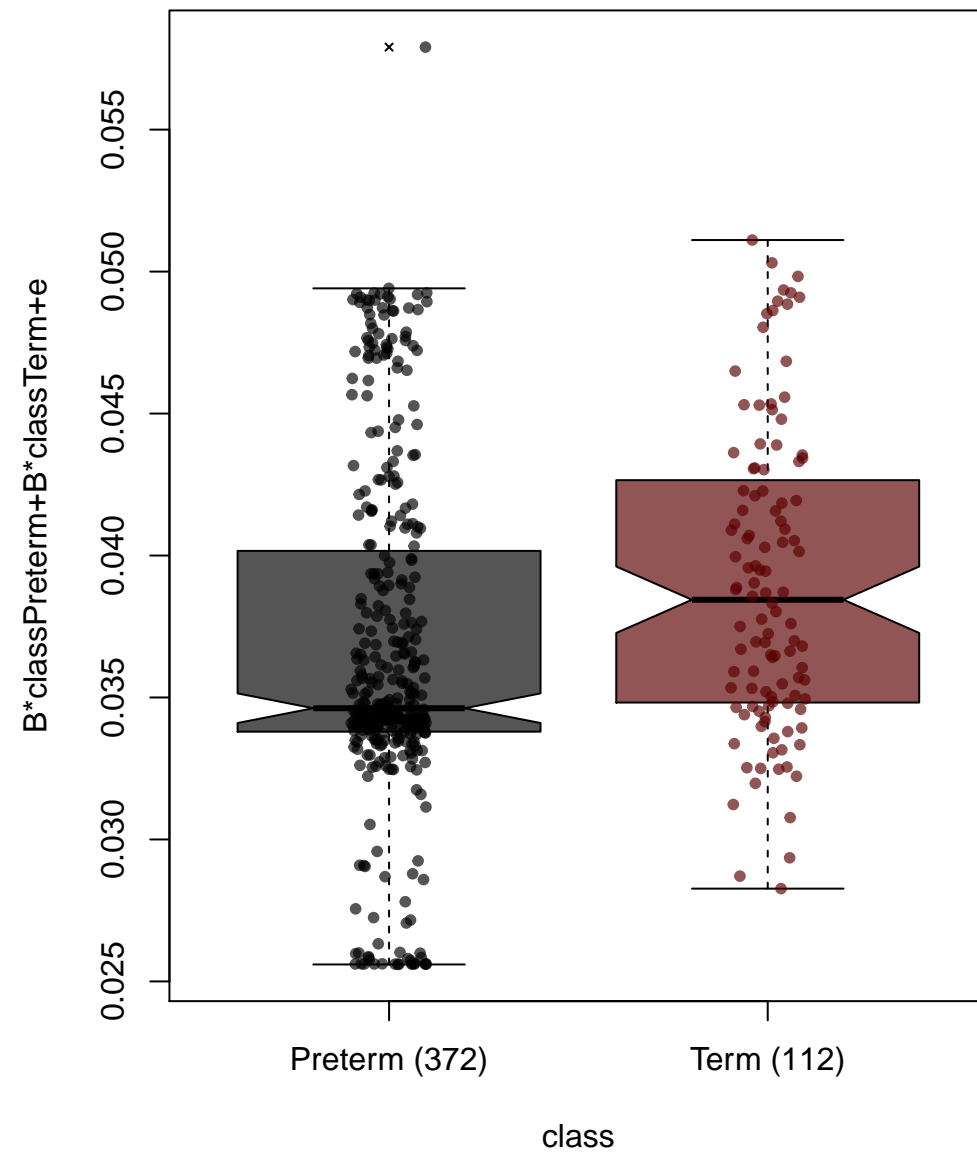

classTerm ( $-0.00427$  sd  $0.00123$ ,  $p=0.00055$ ,  $q=0.000808$ )

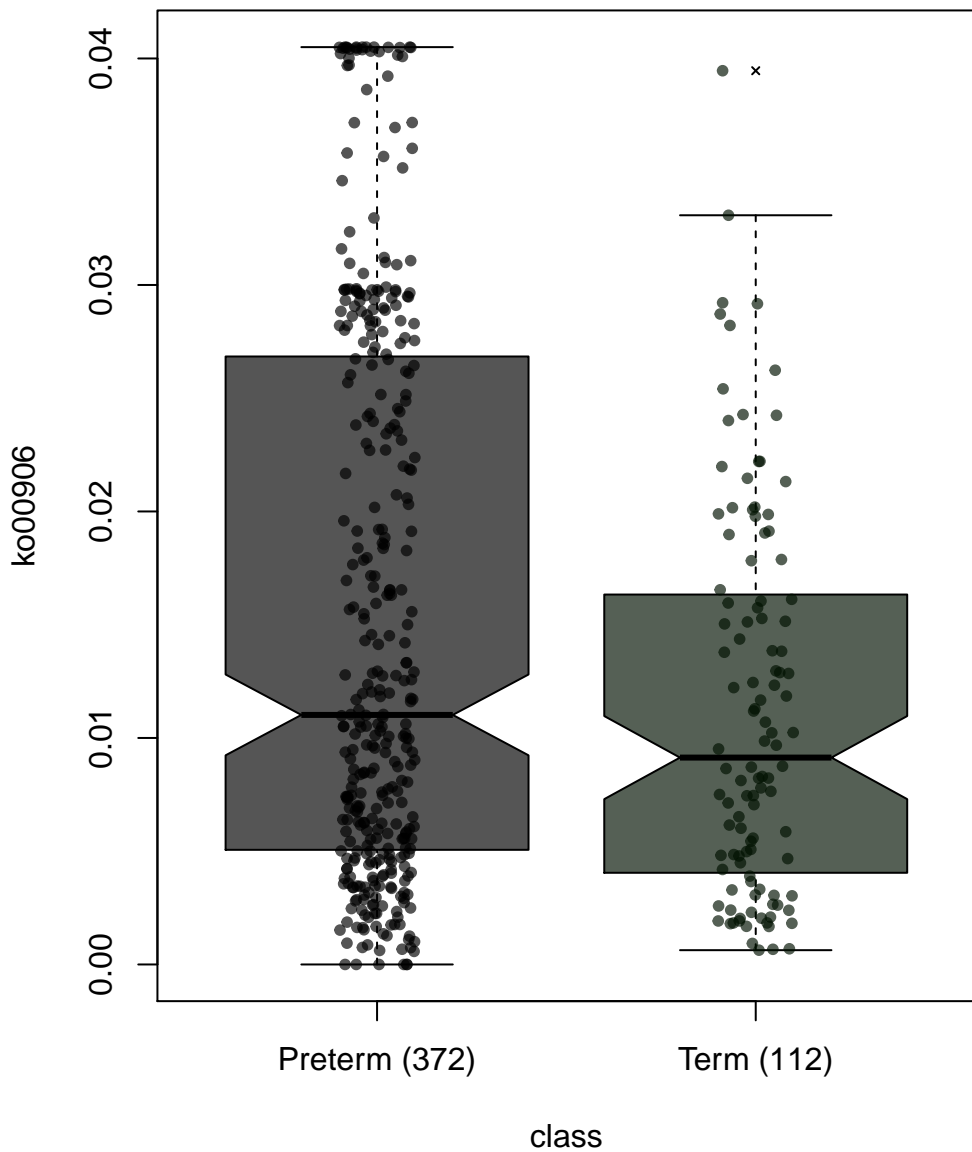

Partial Residual Plot

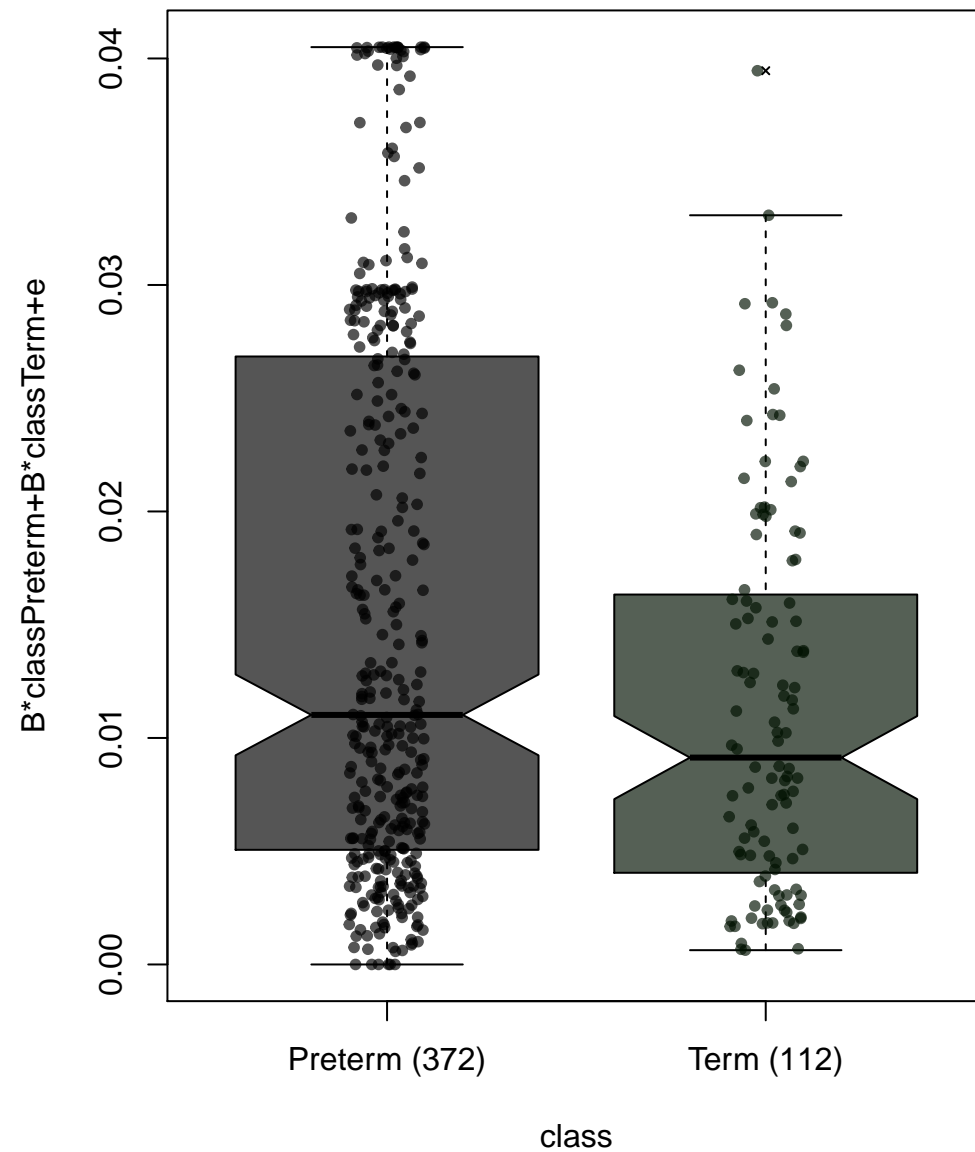

classTerm (0.00158 sd 0.000455, p=0.000581, q=0.000849)

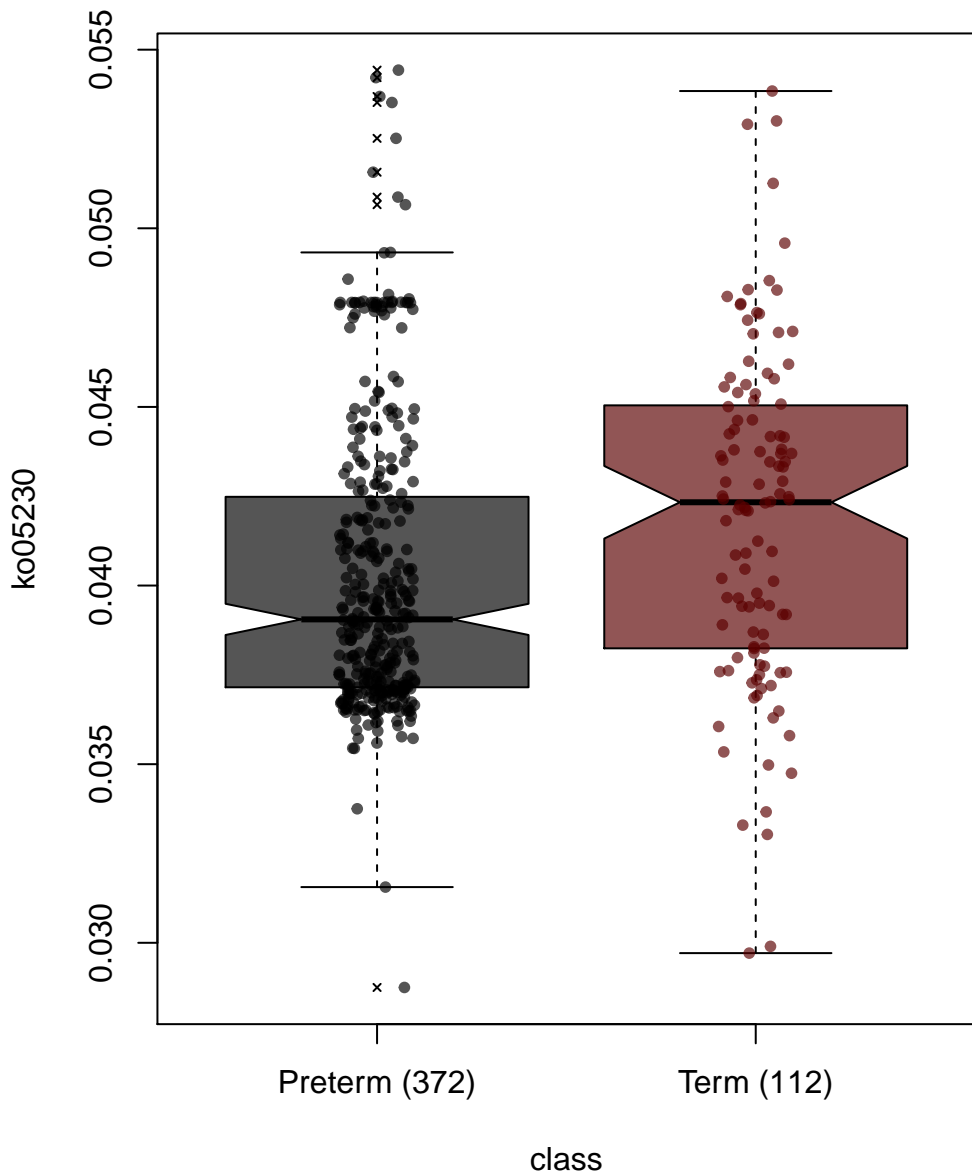

Partial Residual Plot

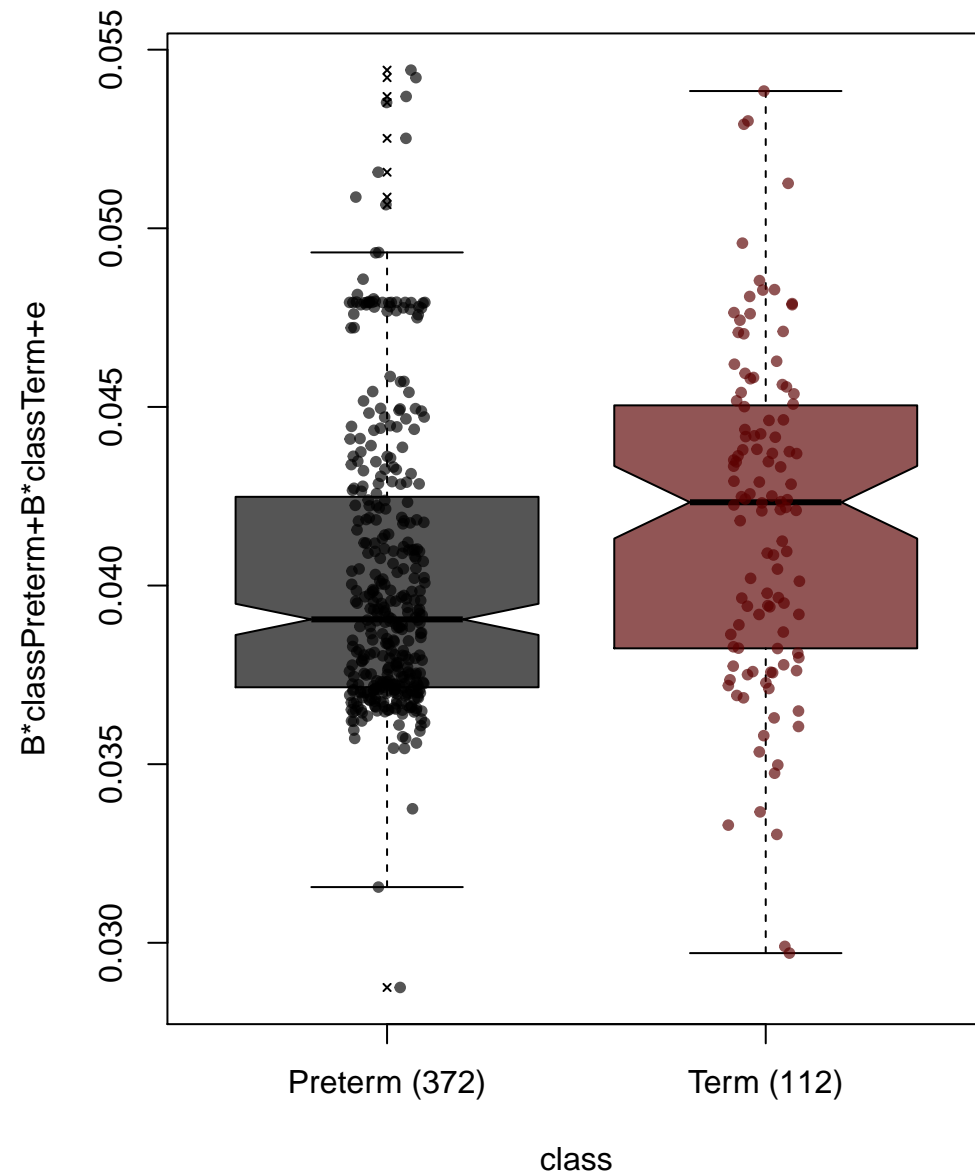

classTerm ( $-0.00247$  sd  $0.00074$ ,  $p=0.000902$ ,  $q=0.00131$ )

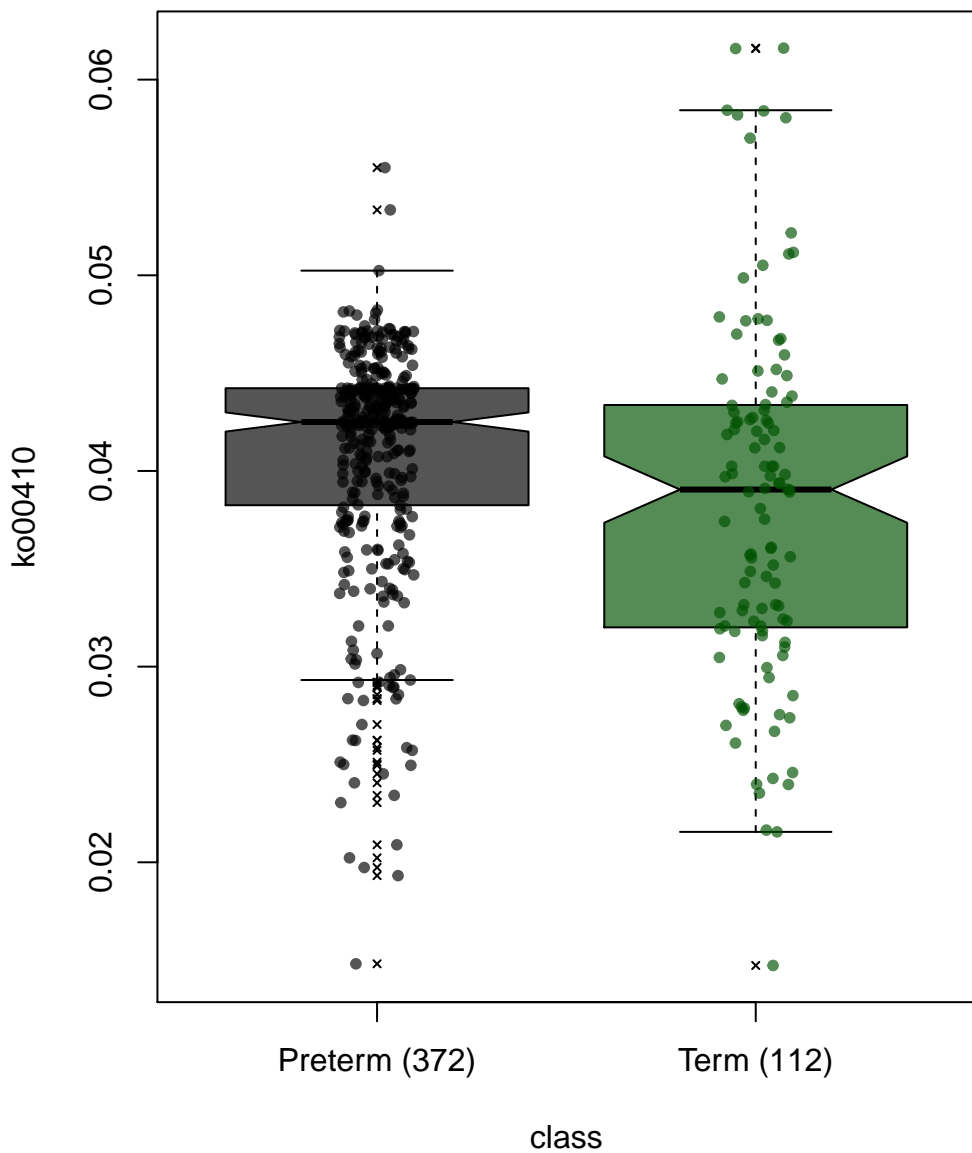

Partial Residual Plot

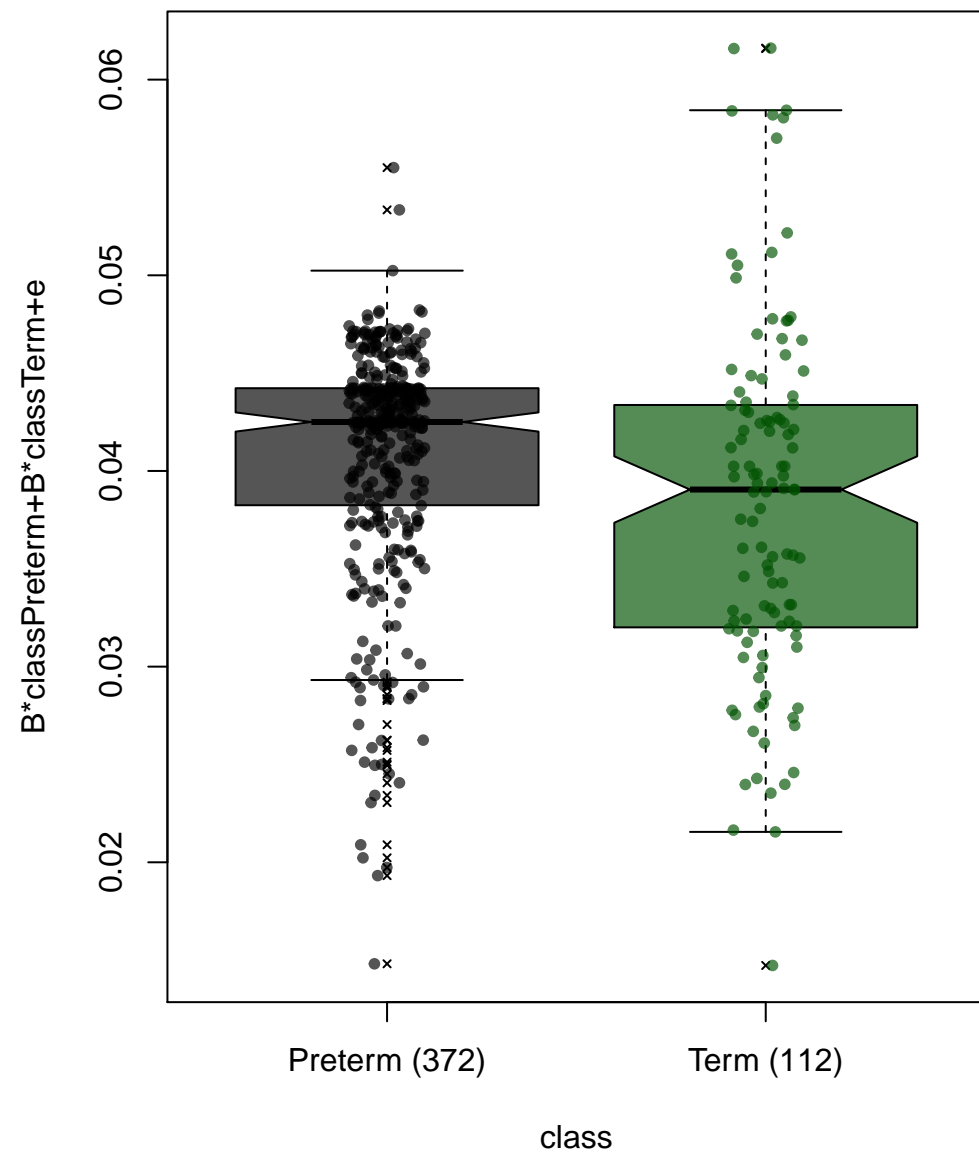

classTerm (-0.0019 sd 0.000573, p=0.00097, q=0.0014)

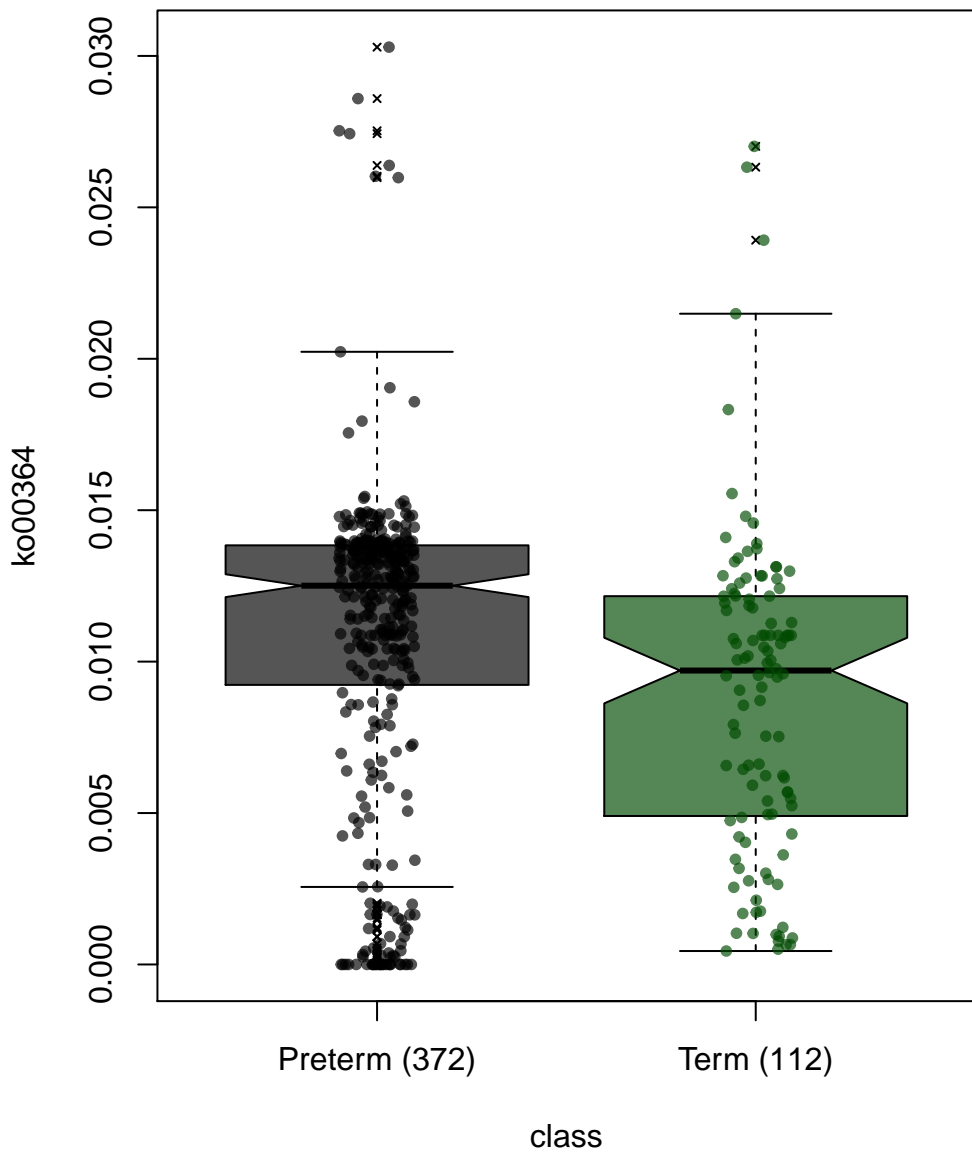

Partial Residual Plot

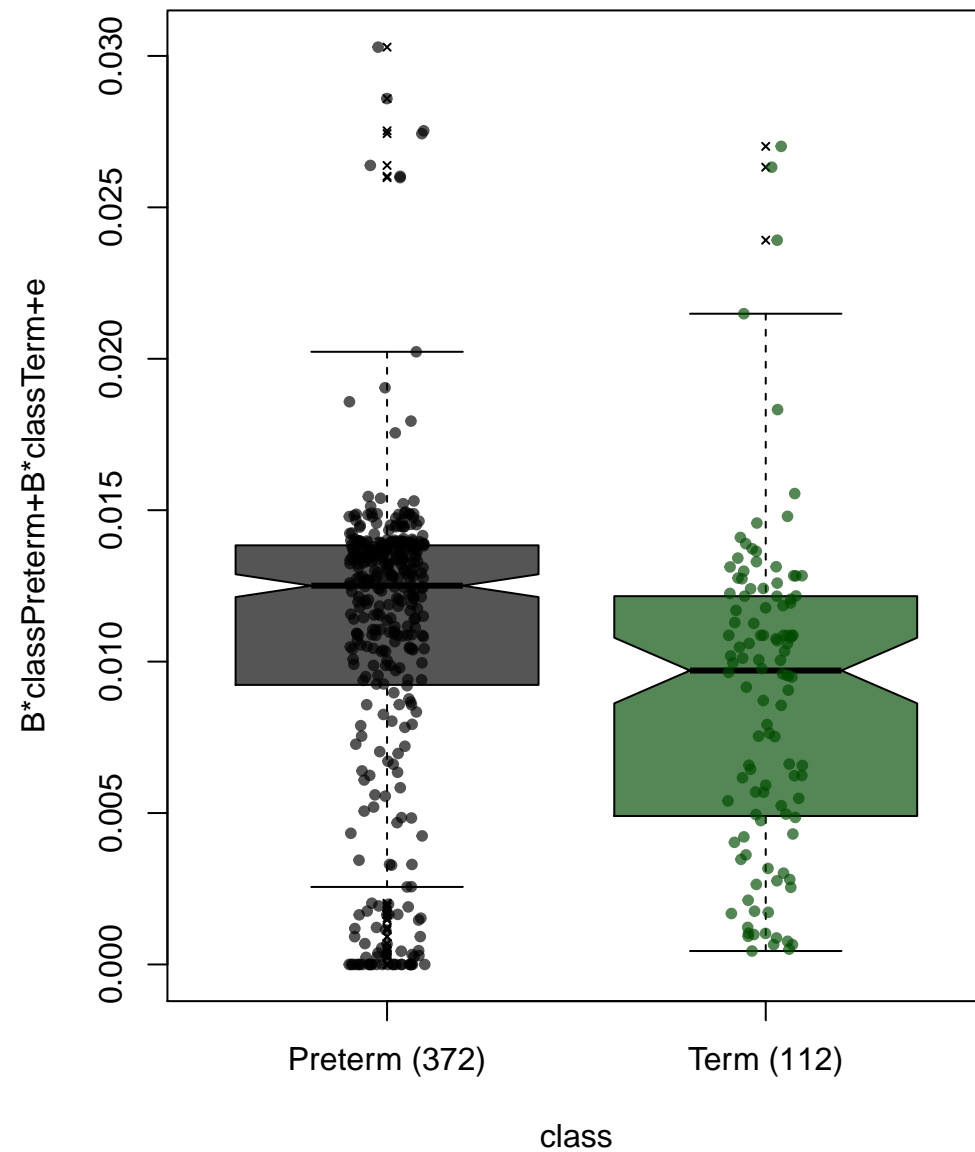

classTerm (0.00159 sd 0.000485, p=0.00114, q=0.00164)

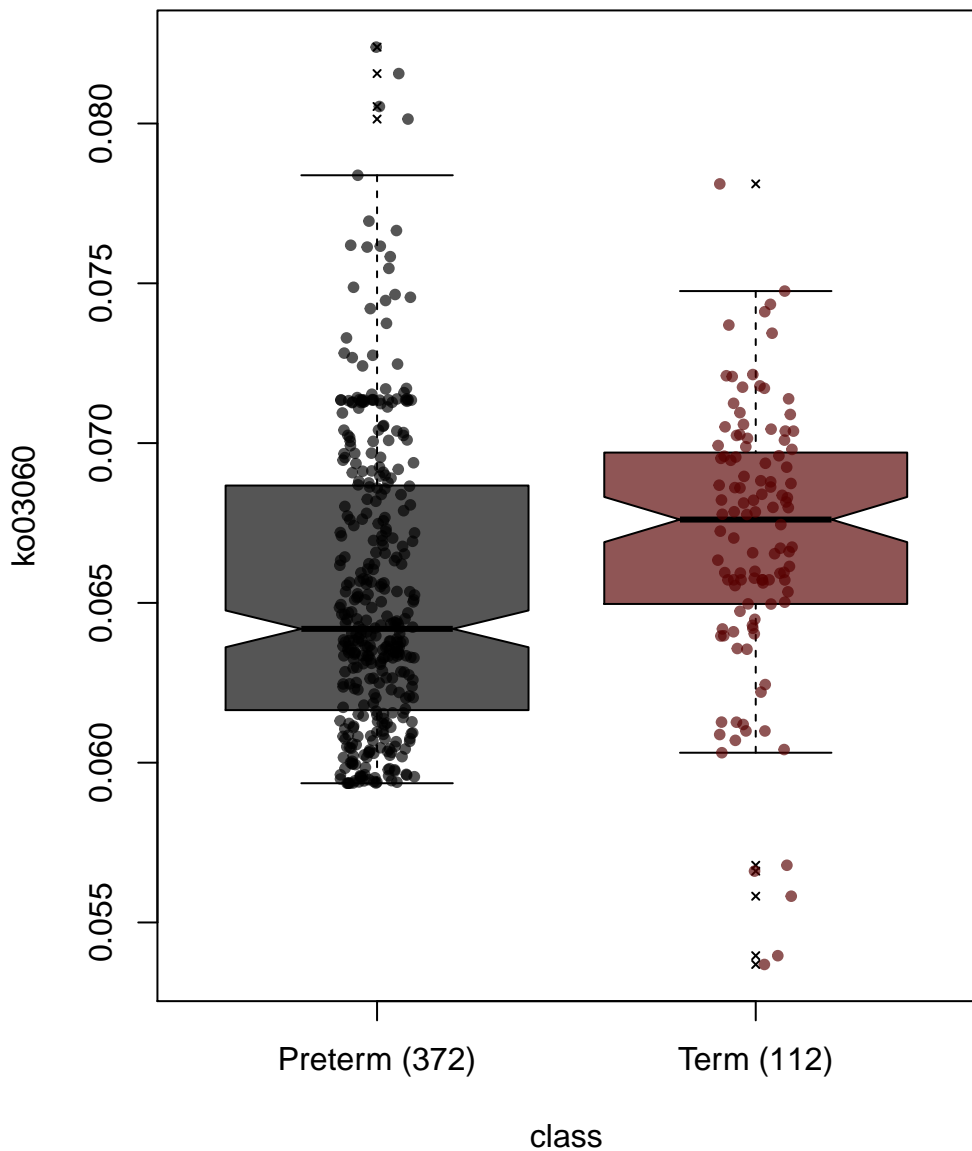

Partial Residual Plot

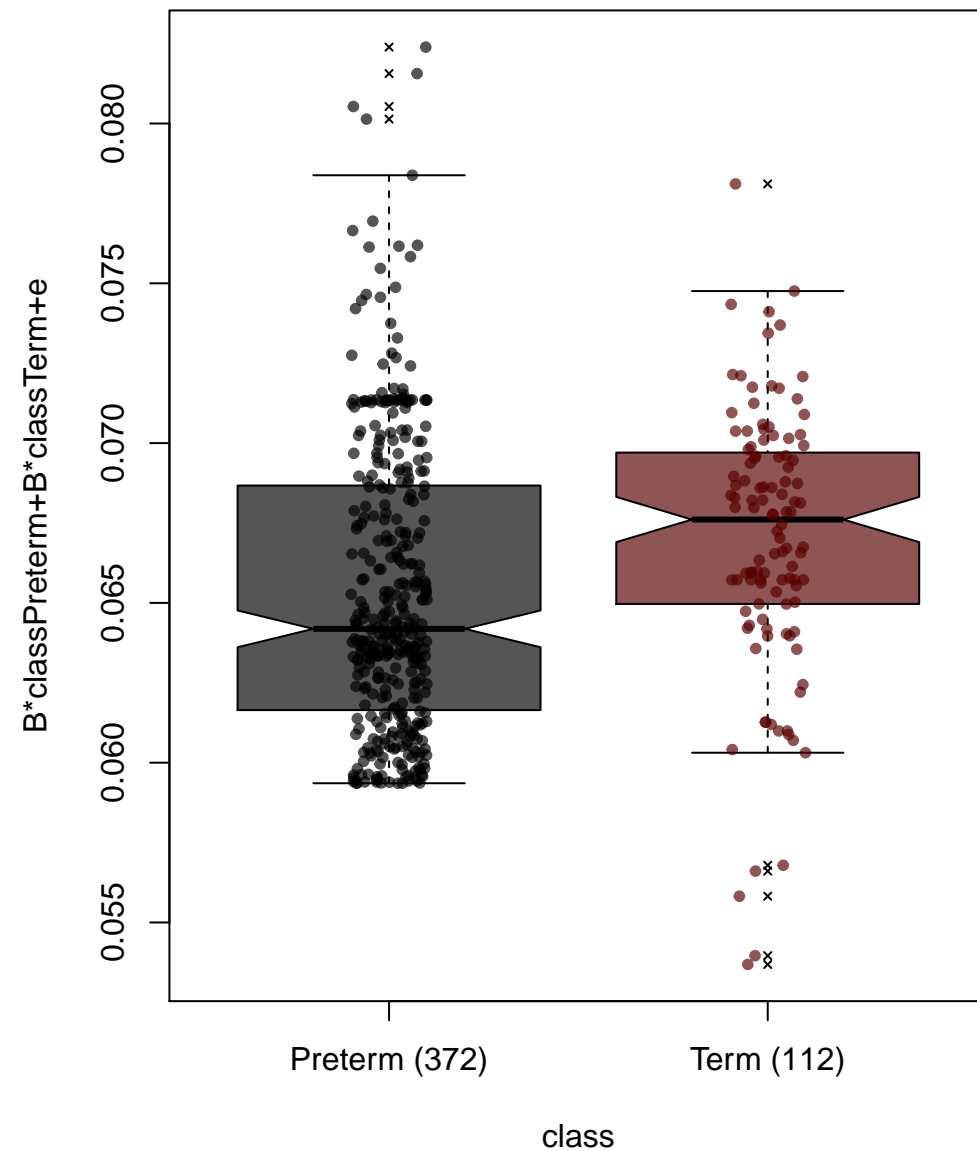

classTerm (0.00221 sd 0.000678, p=0.00119, q=0.0017)

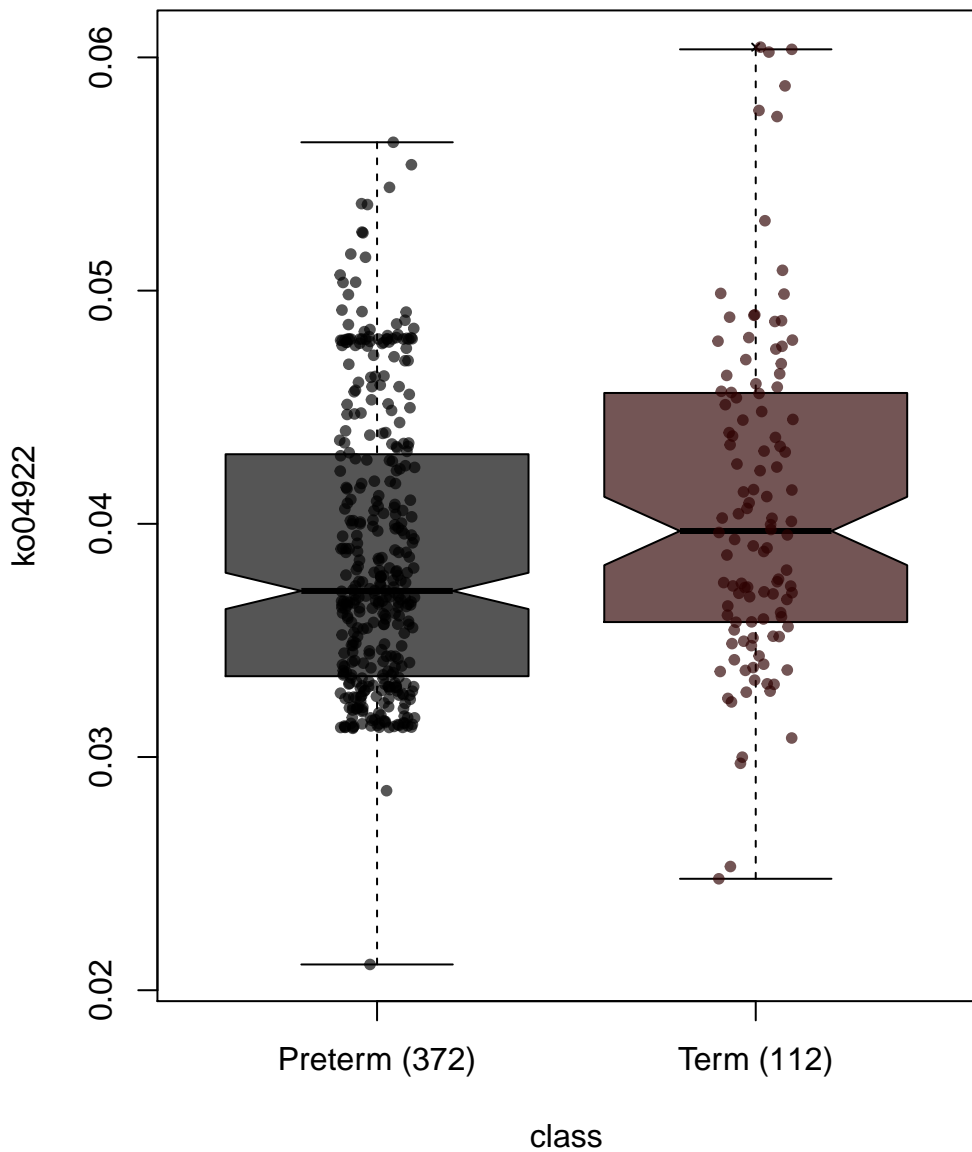

Partial Residual Plot

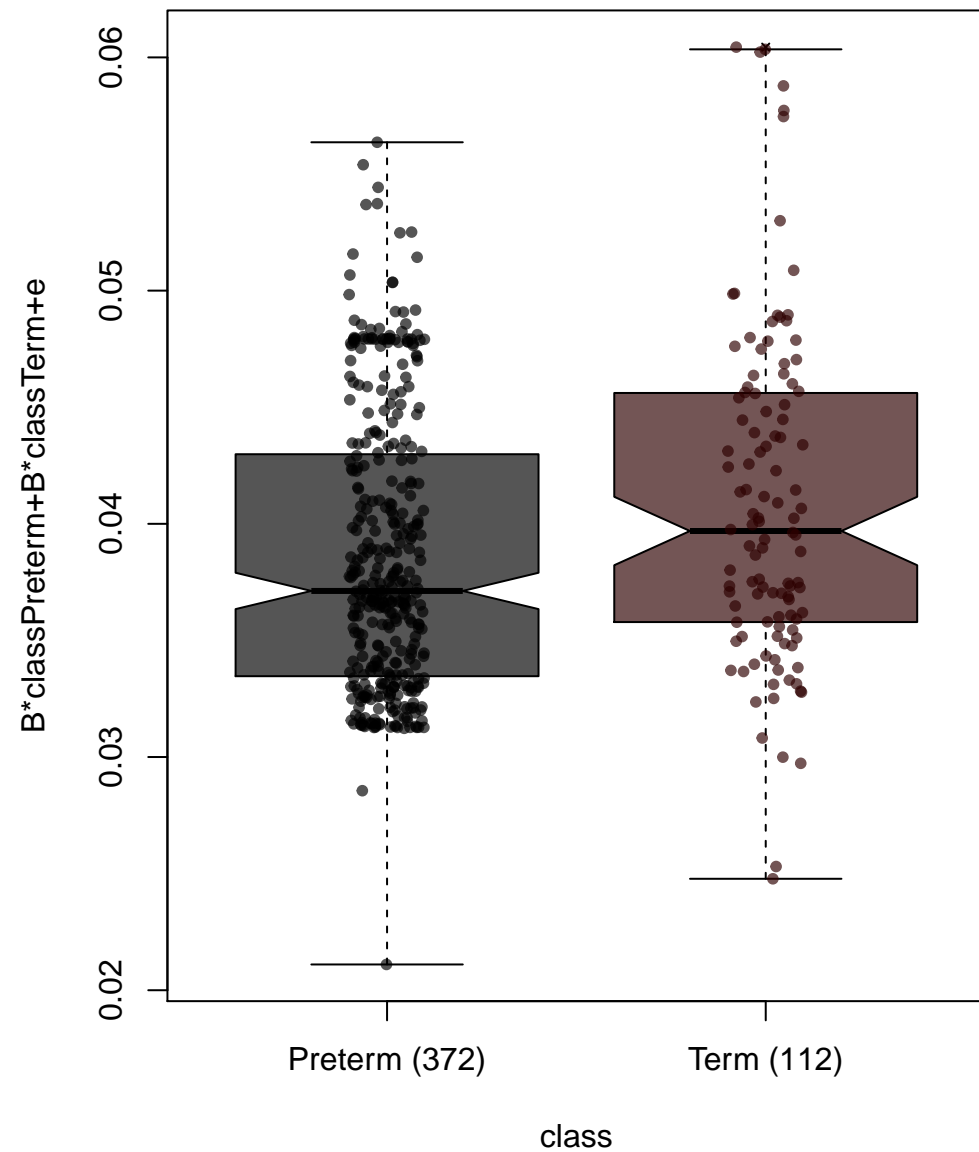



classTerm ( $-0.00167$  sd  $0.00052$ ,  $p=0.00143$ ,  $q=0.00203$ )

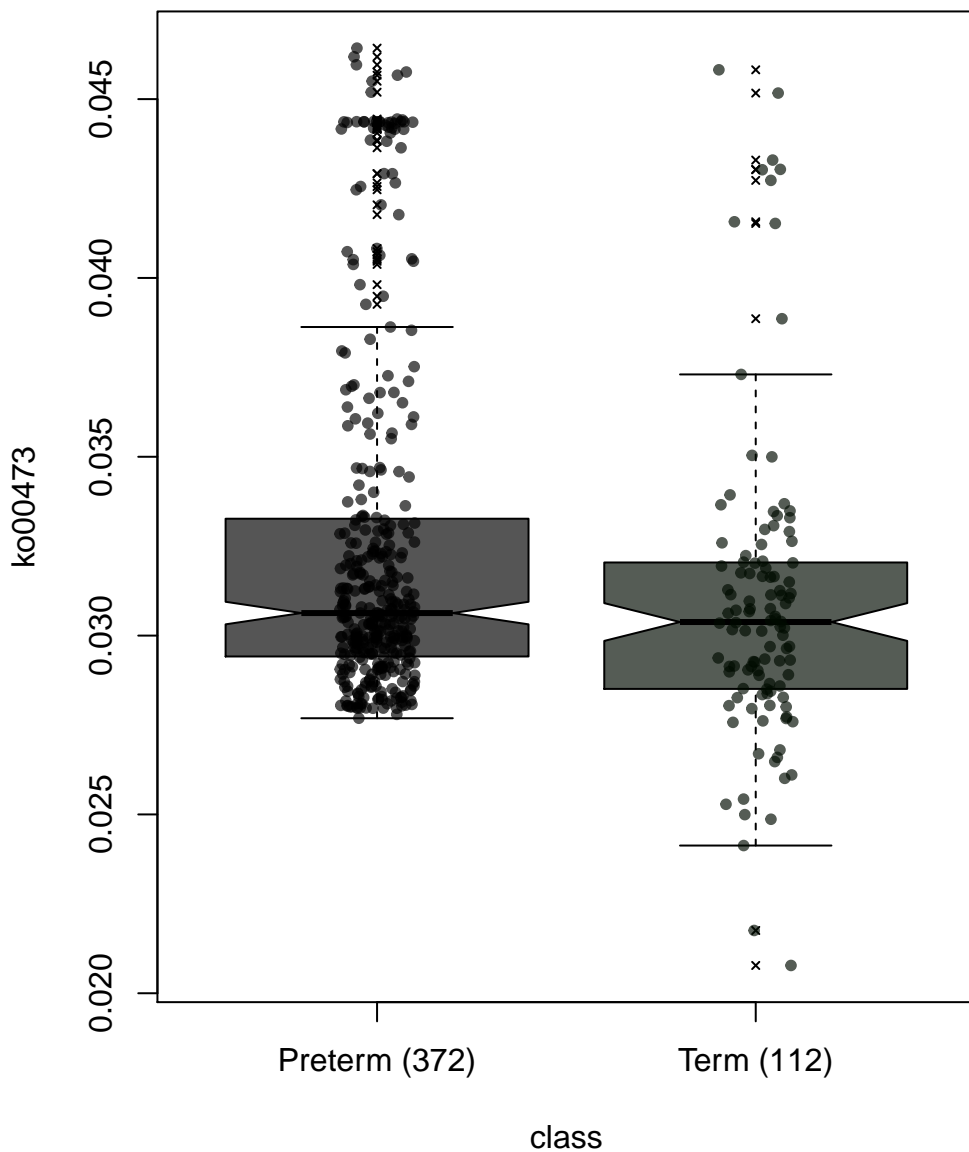

Partial Residual Plot

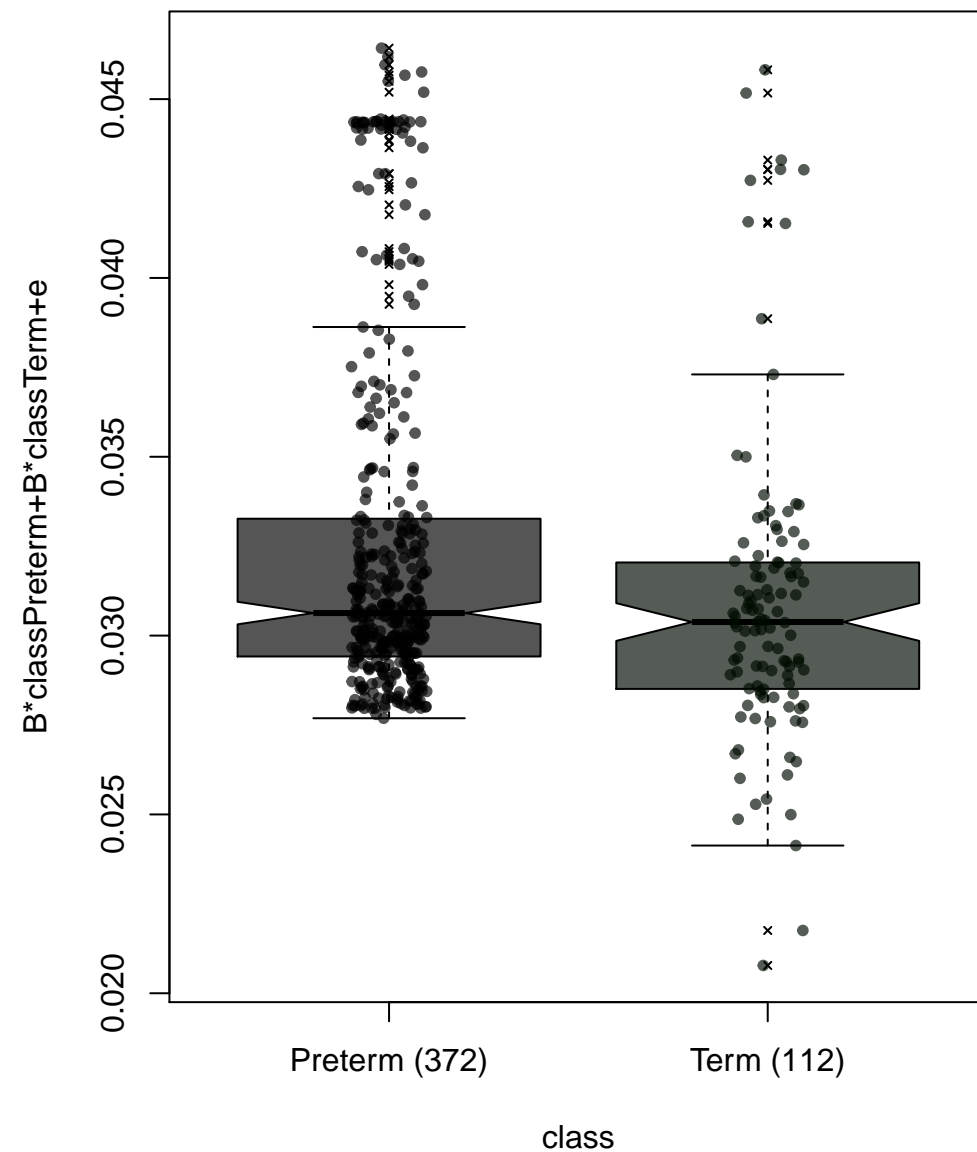

classTerm ( $-0.00182$  sd  $0.000576$ ,  $p=0.00169$ ,  $q=0.0024$ )

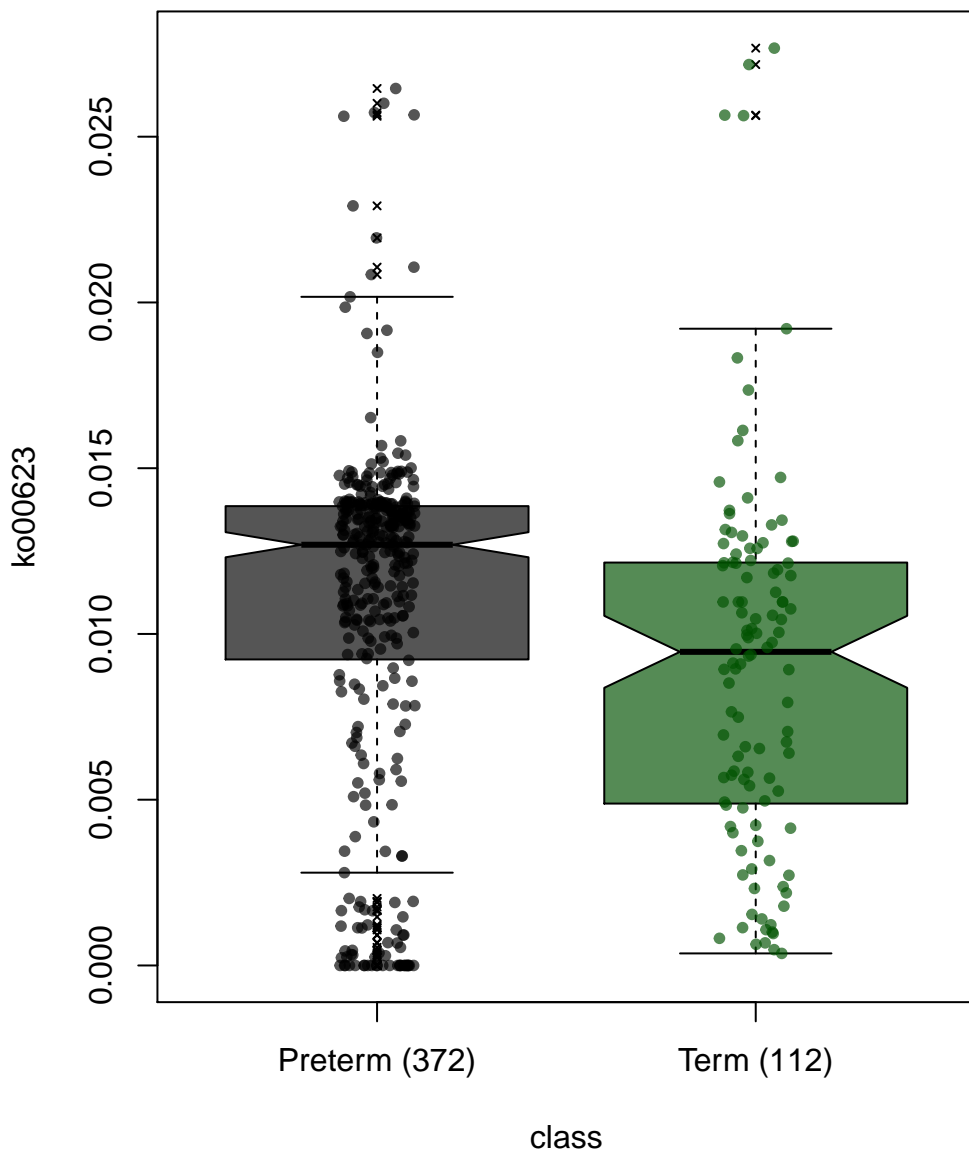

Partial Residual Plot

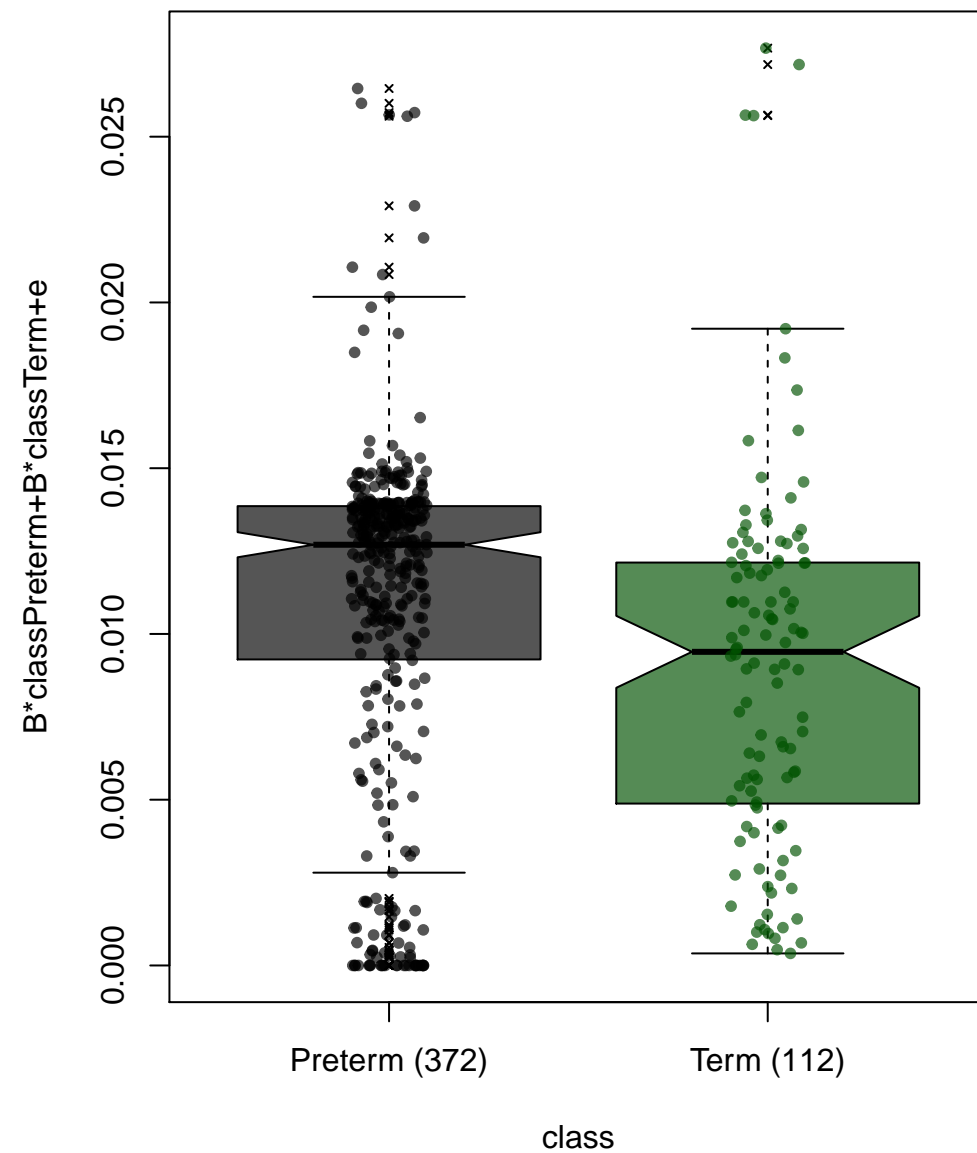

classTerm (0.000436 sd 0.000138, p=0.00171, q=0.0024)

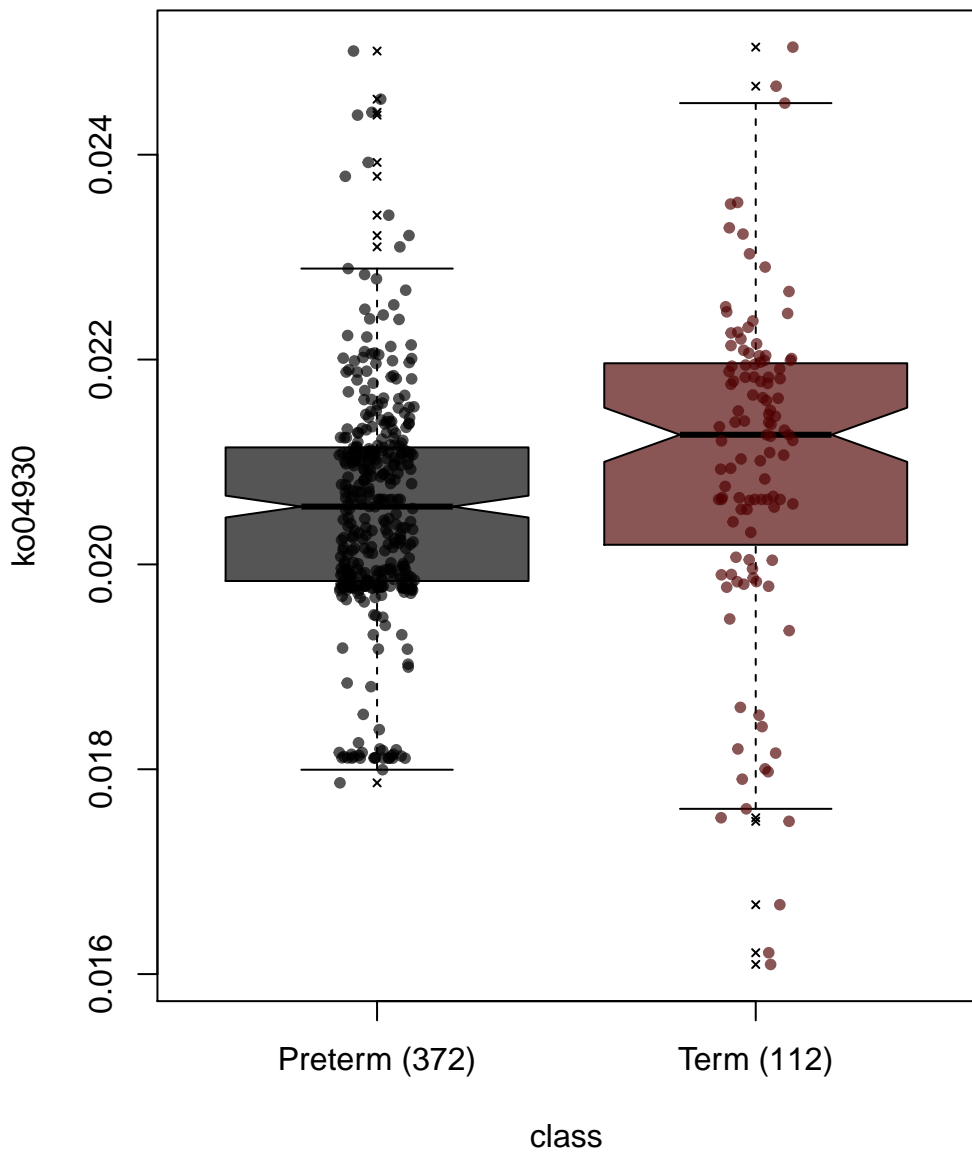

Partial Residual Plot

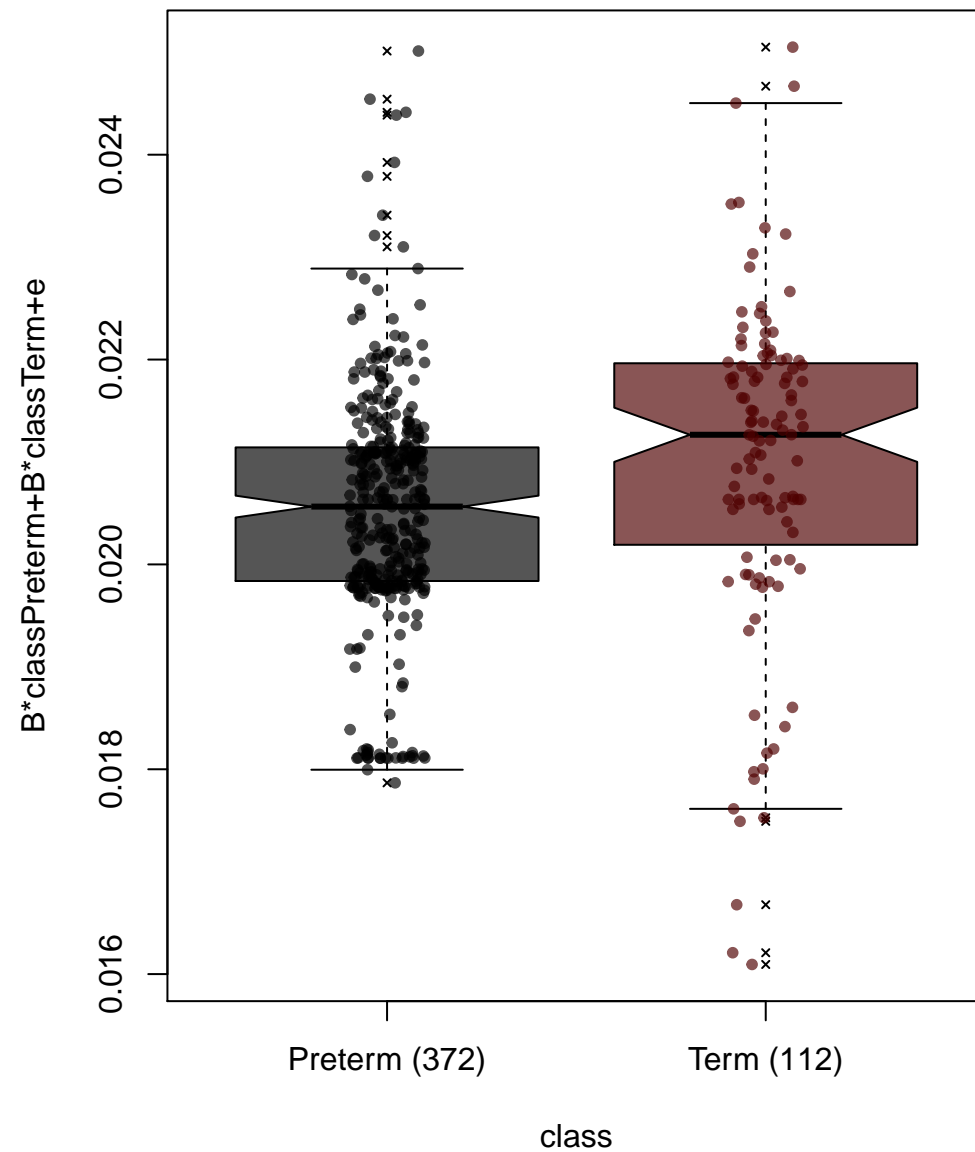

classTerm (−0.00243 sd 0.00078, p=0.00198, q=0.00278)

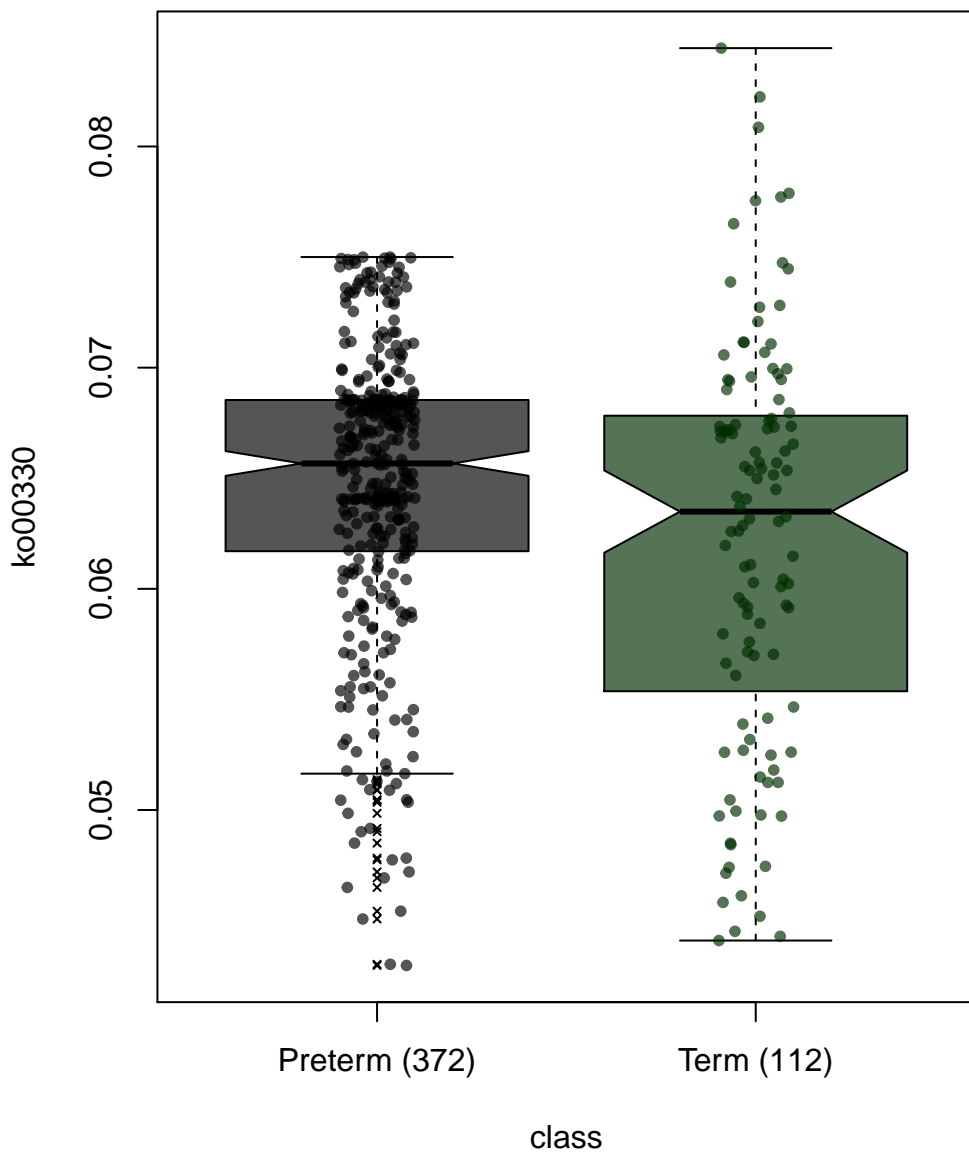

Partial Residual Plot

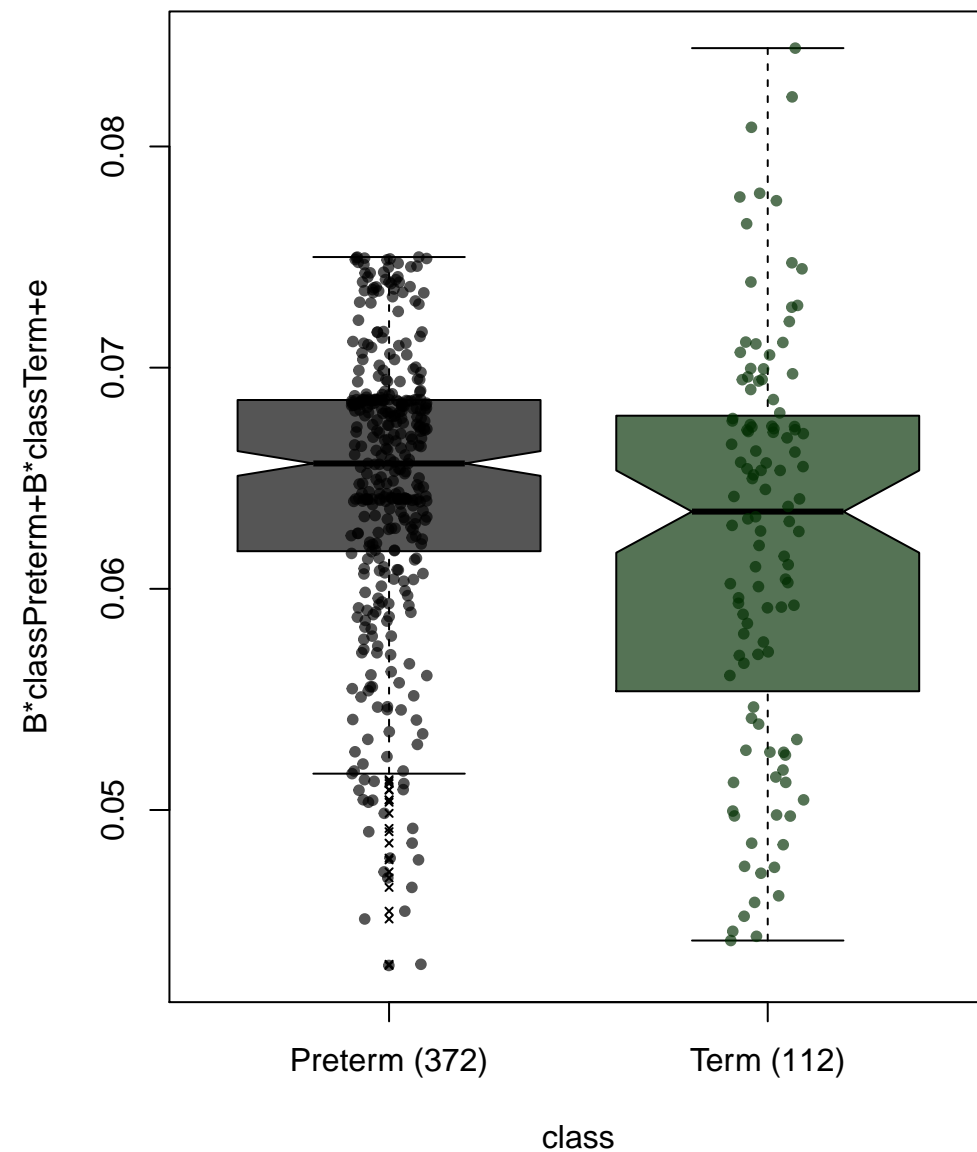

classTerm (0.00142 sd 0.000459, p=0.00215, q=0.00299)

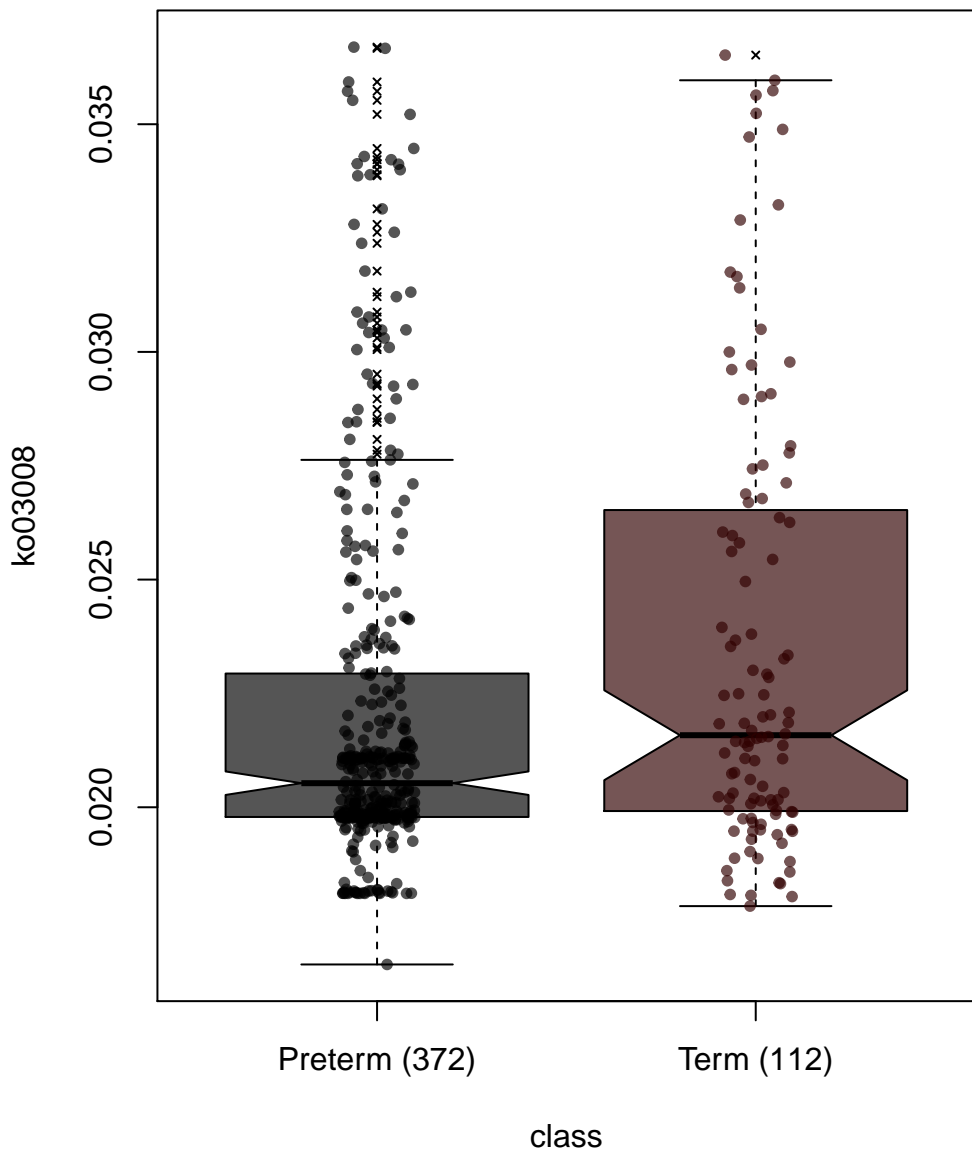

Partial Residual Plot

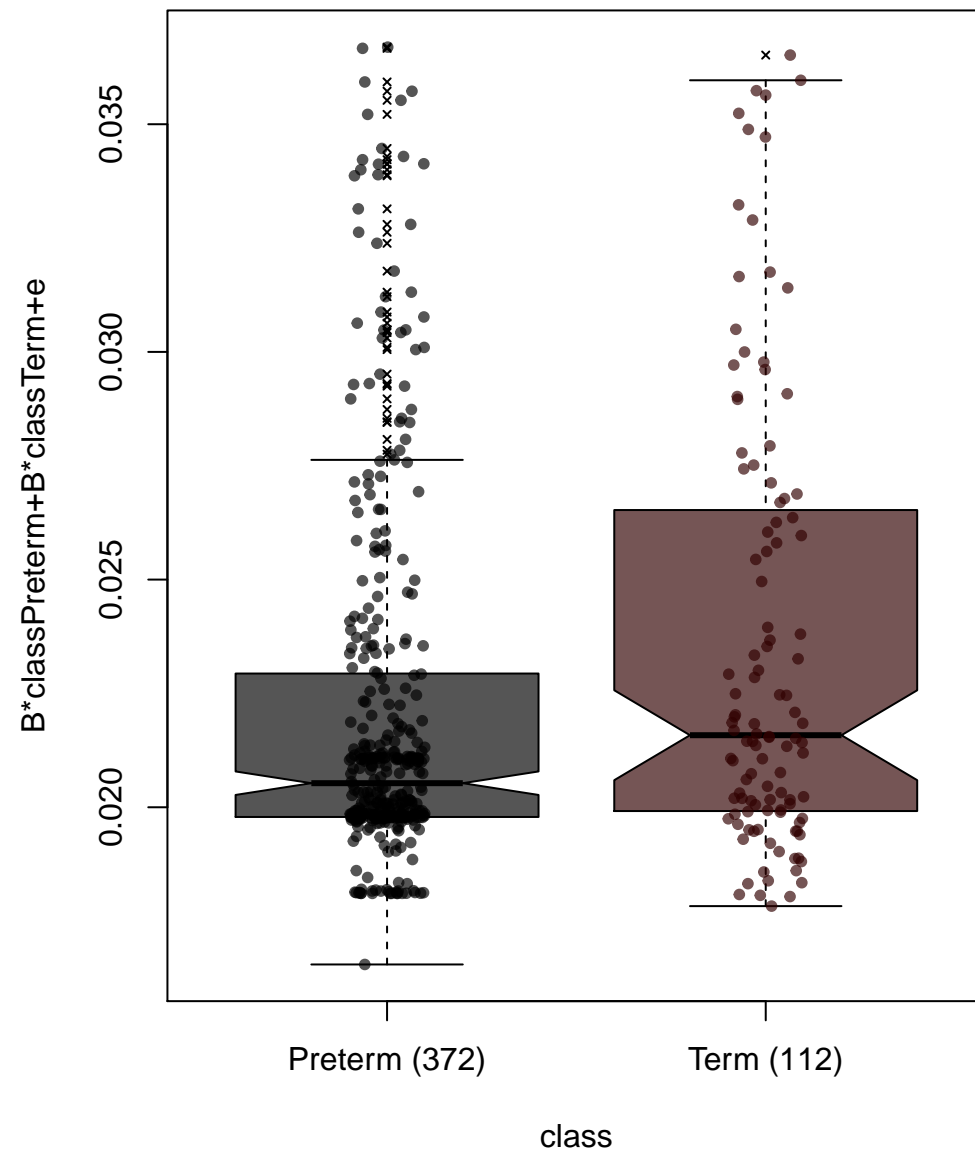

classTerm ( $-0.00228$  sd  $0.000745$ ,  $p=0.00232$ ,  $q=0.00323$ )

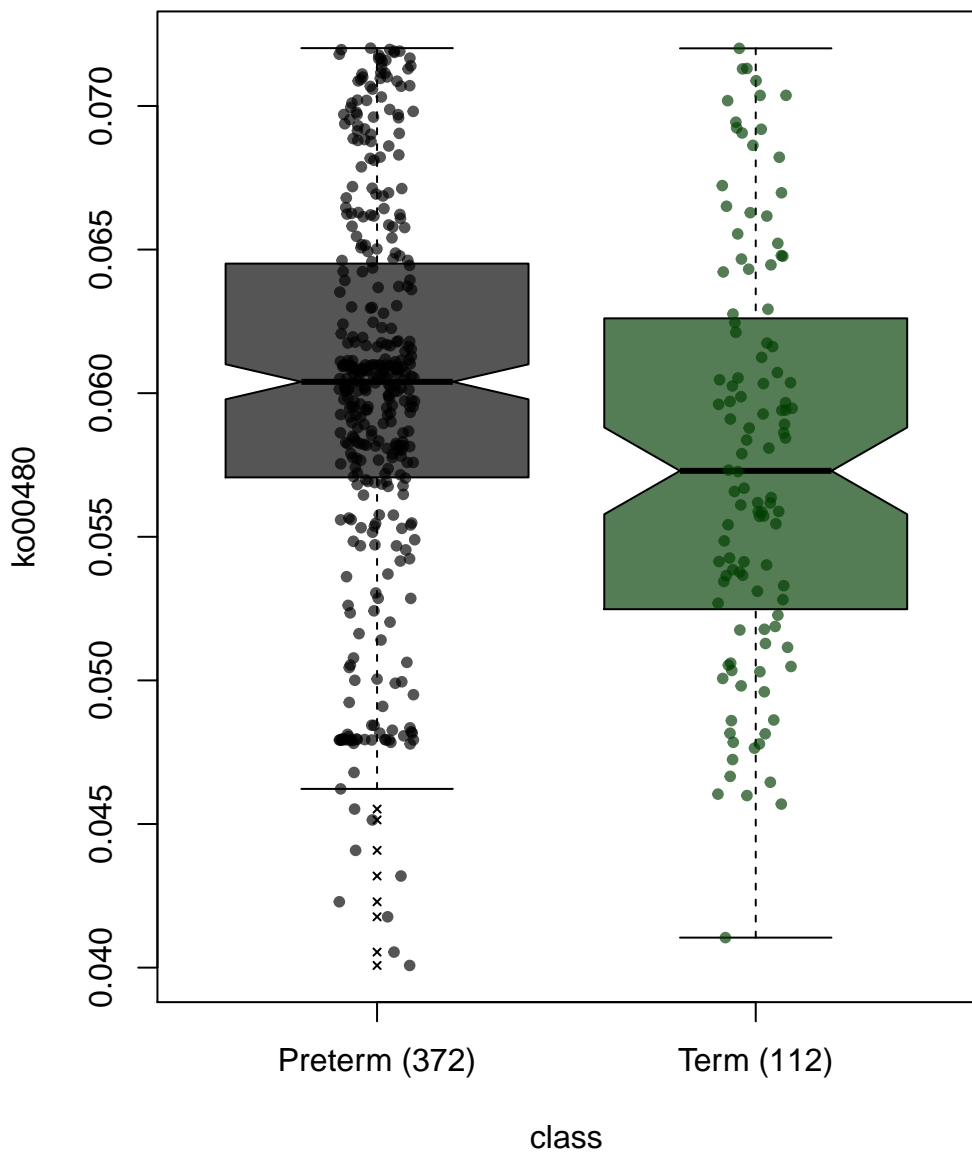

Partial Residual Plot

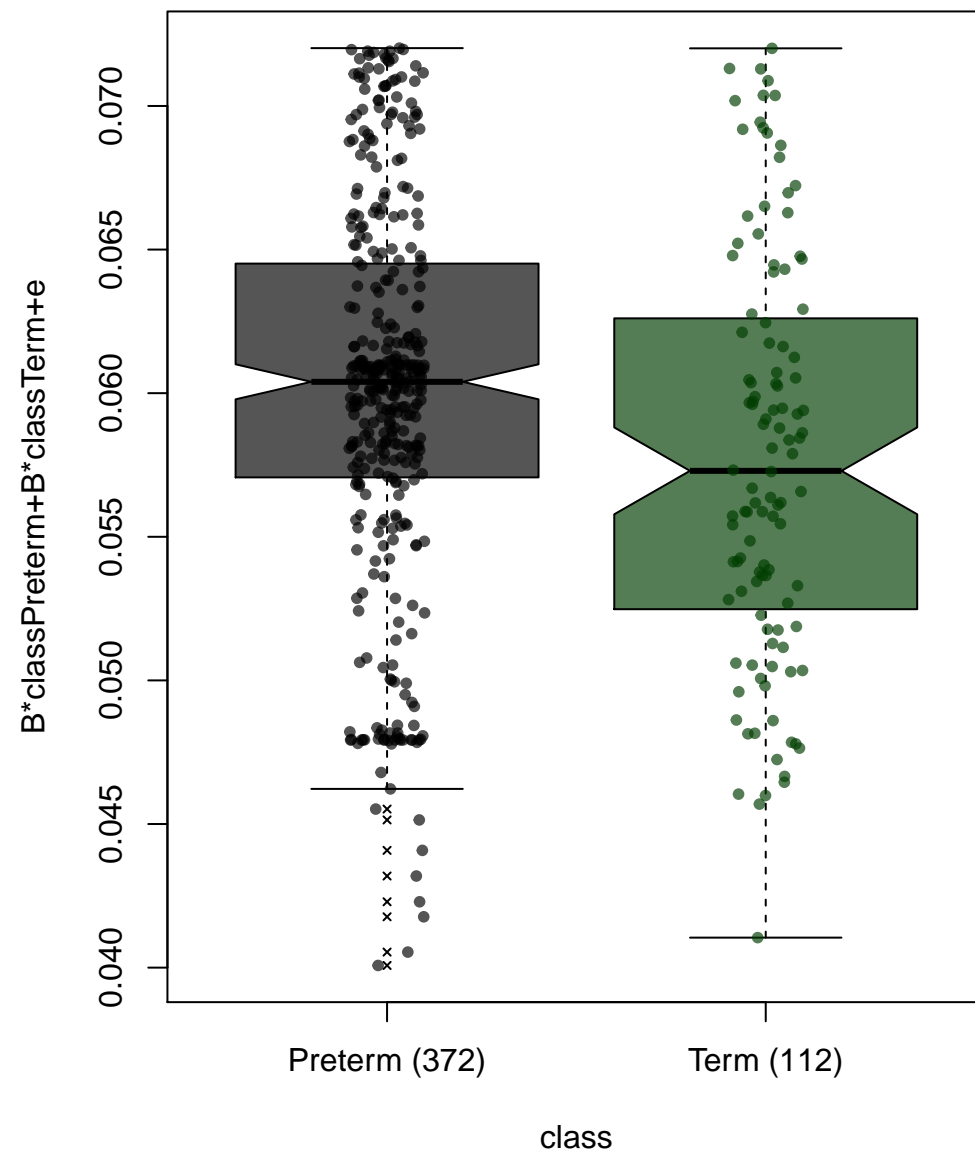

classTerm ( $-0.00285$  sd  $0.000933$ ,  $p=0.00237$ ,  $q=0.00327$ )

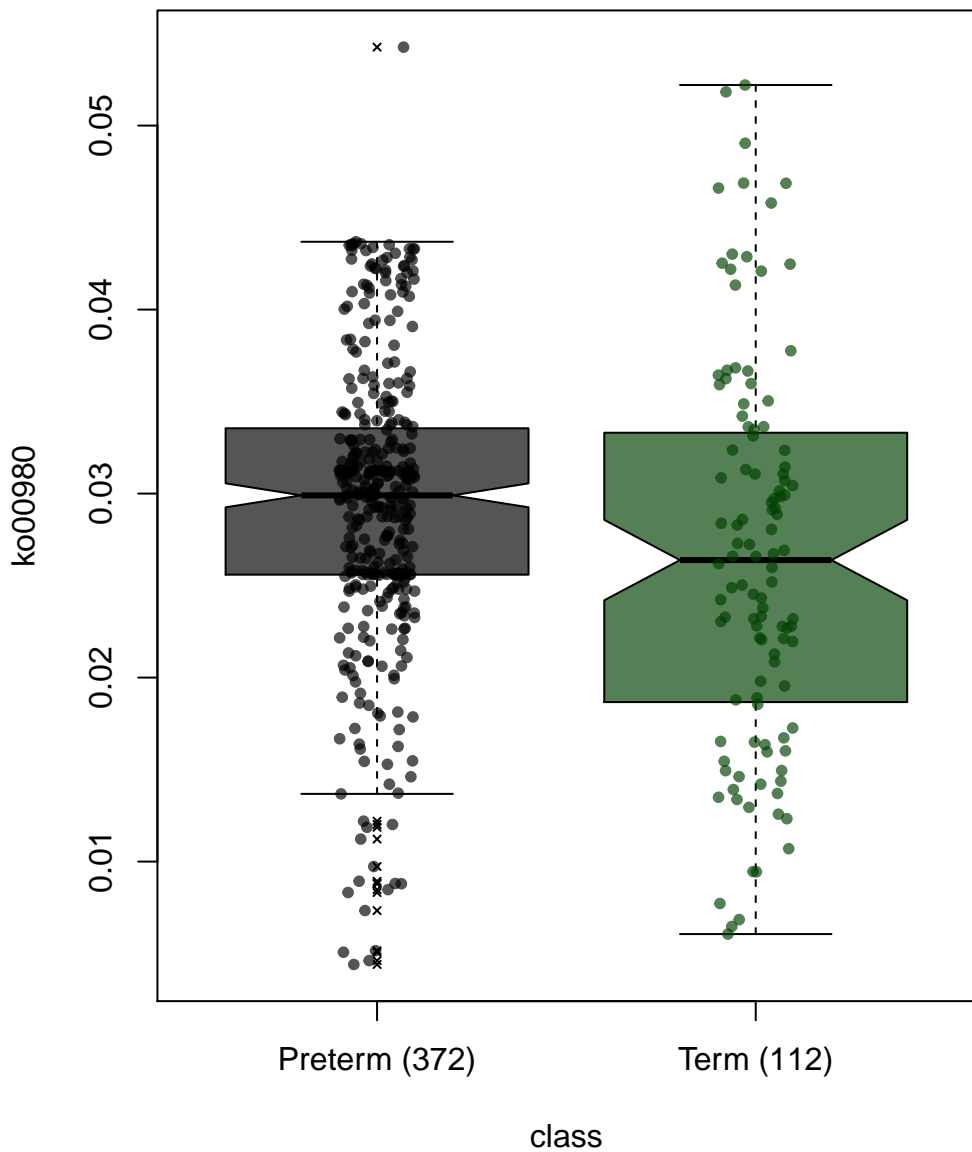

Partial Residual Plot

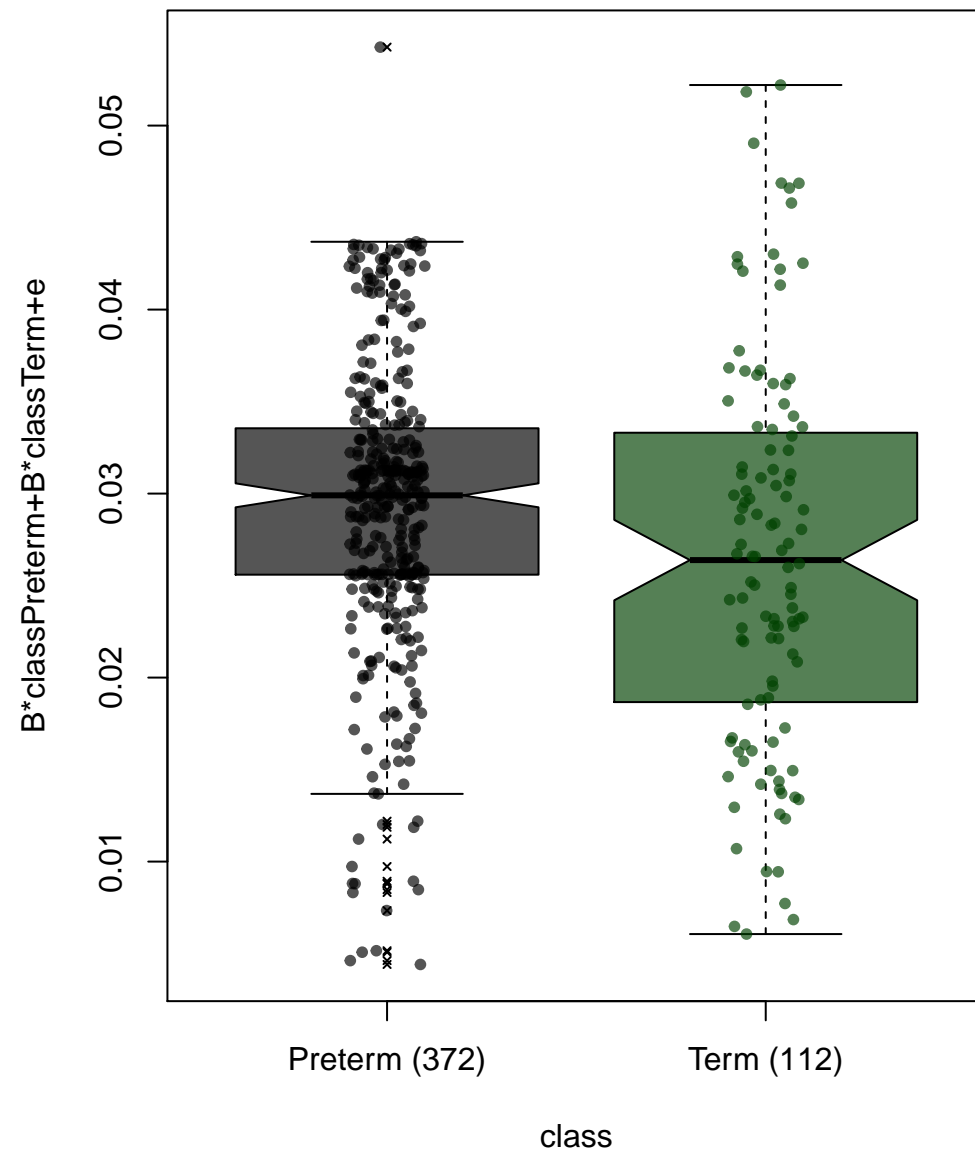

classTerm (−0.00095 sd 0.000315, p=0.0027, q=0.00371)

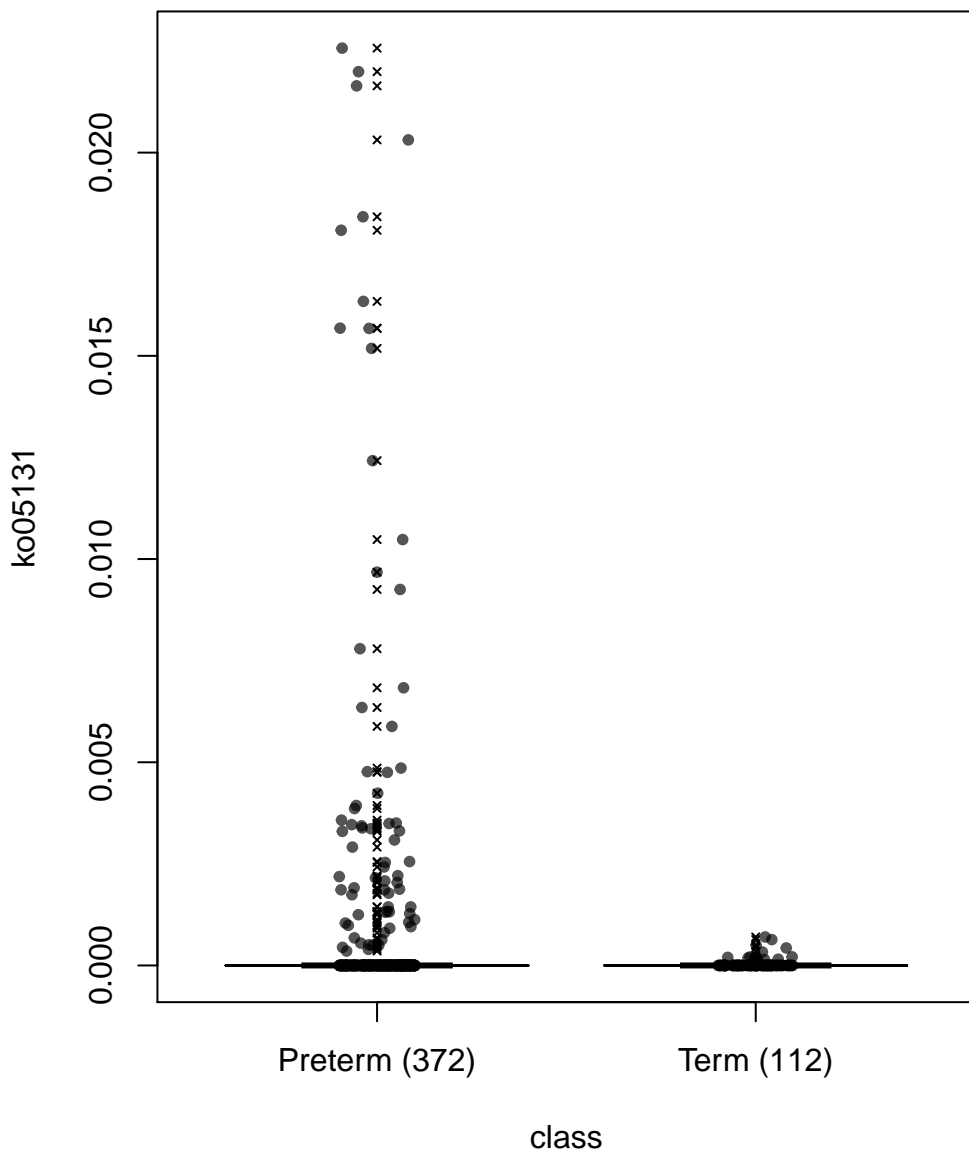

Partial Residual Plot

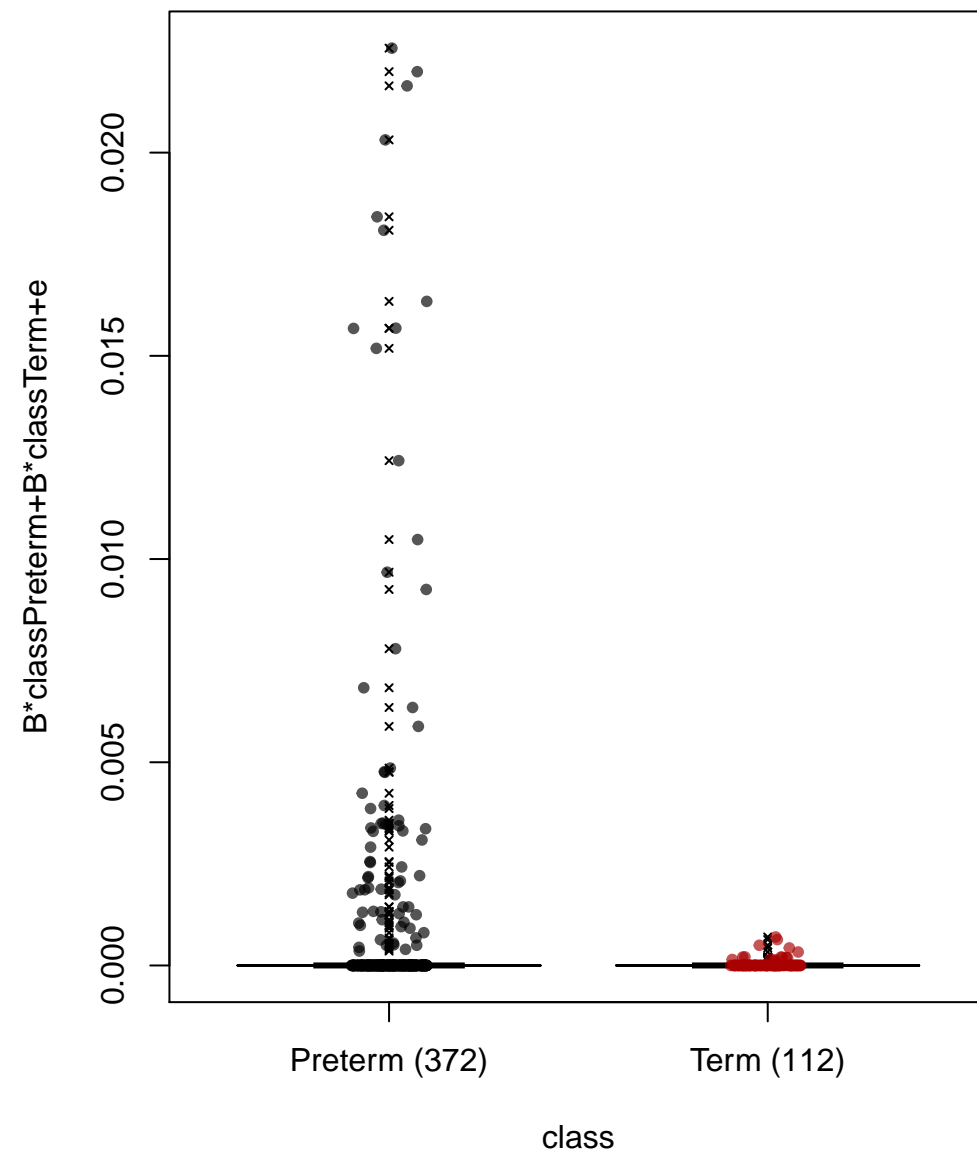



classTerm (0.00021 sd 6.99e-05, p=0.00272, q=0.00373)

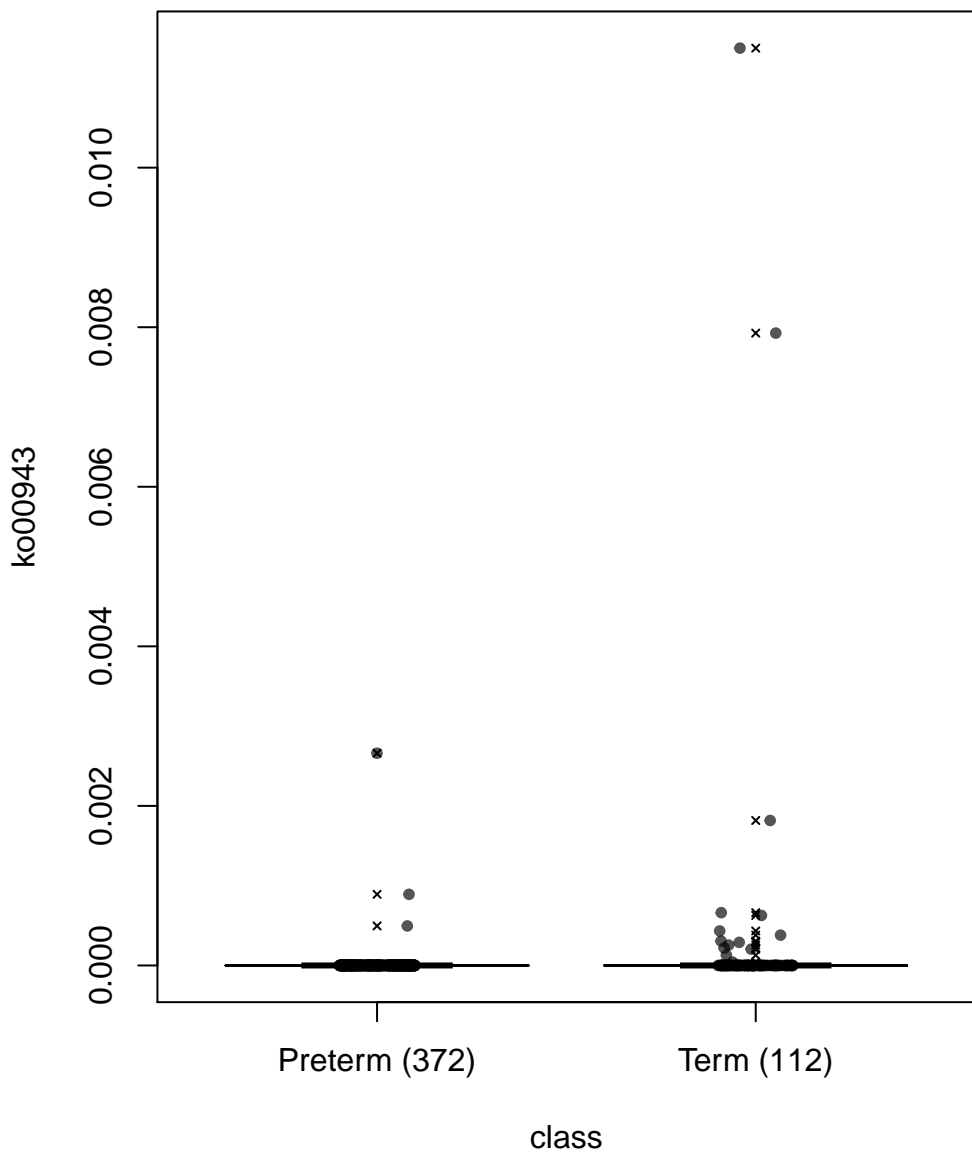

Partial Residual Plot

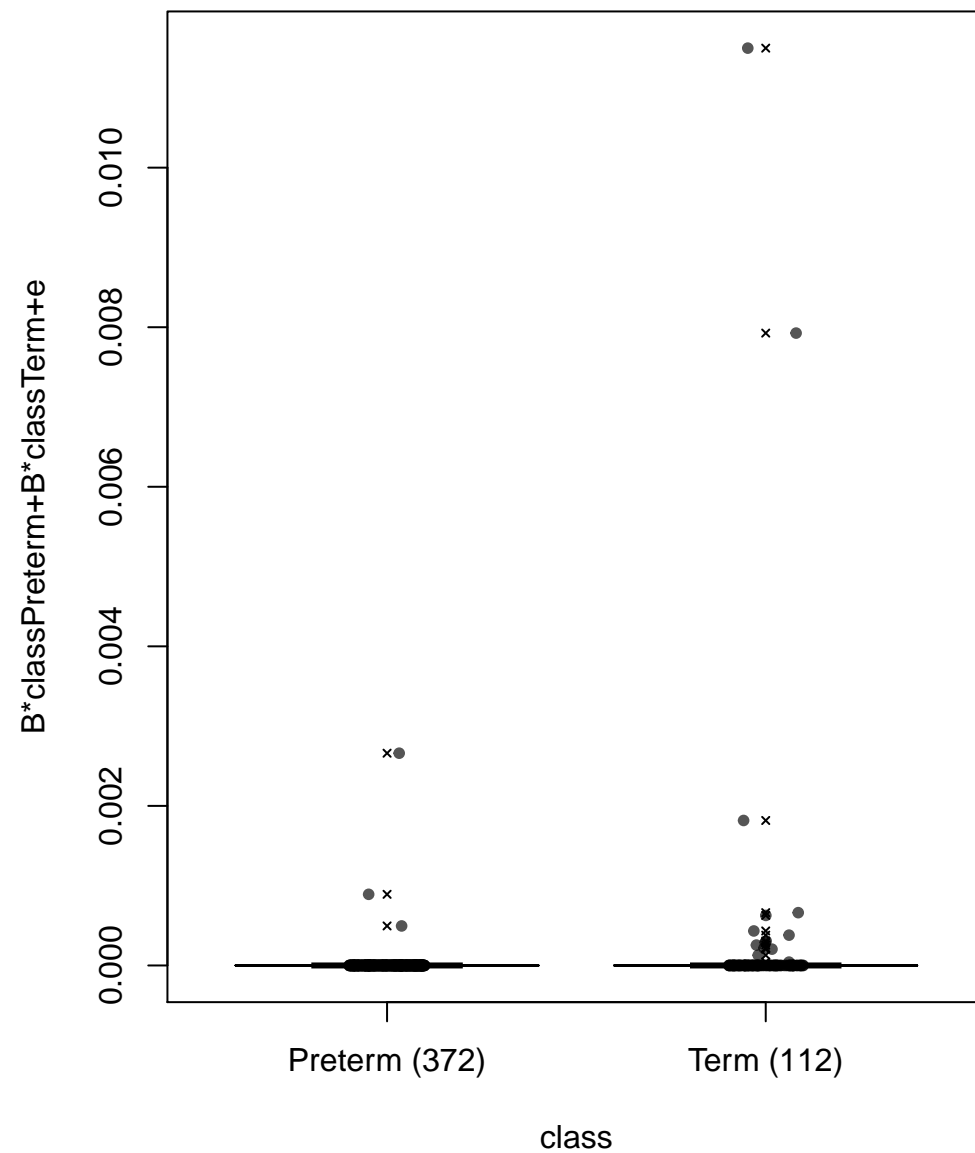

classTerm (-0.00175 sd 0.000596, p=0.00351, q=0.00477)

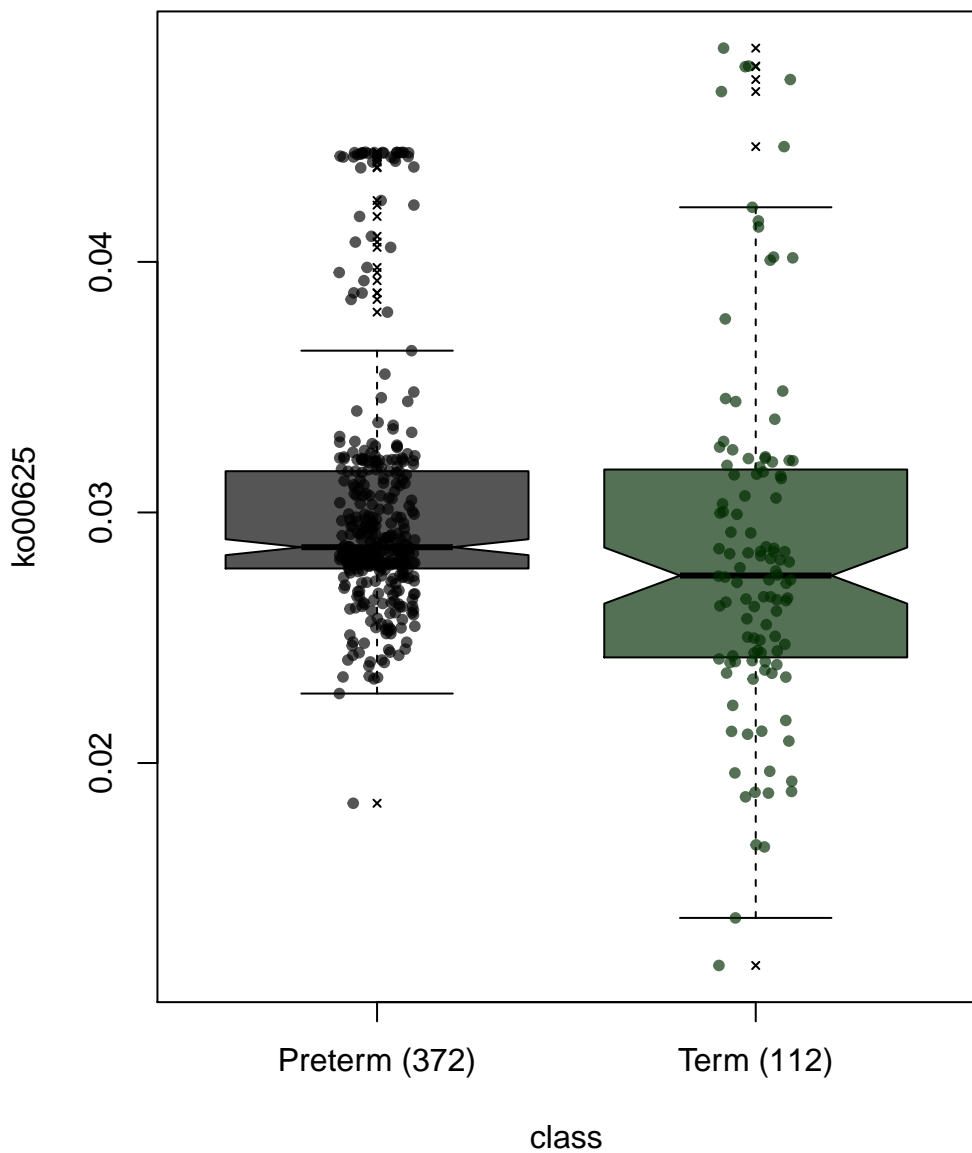

Partial Residual Plot

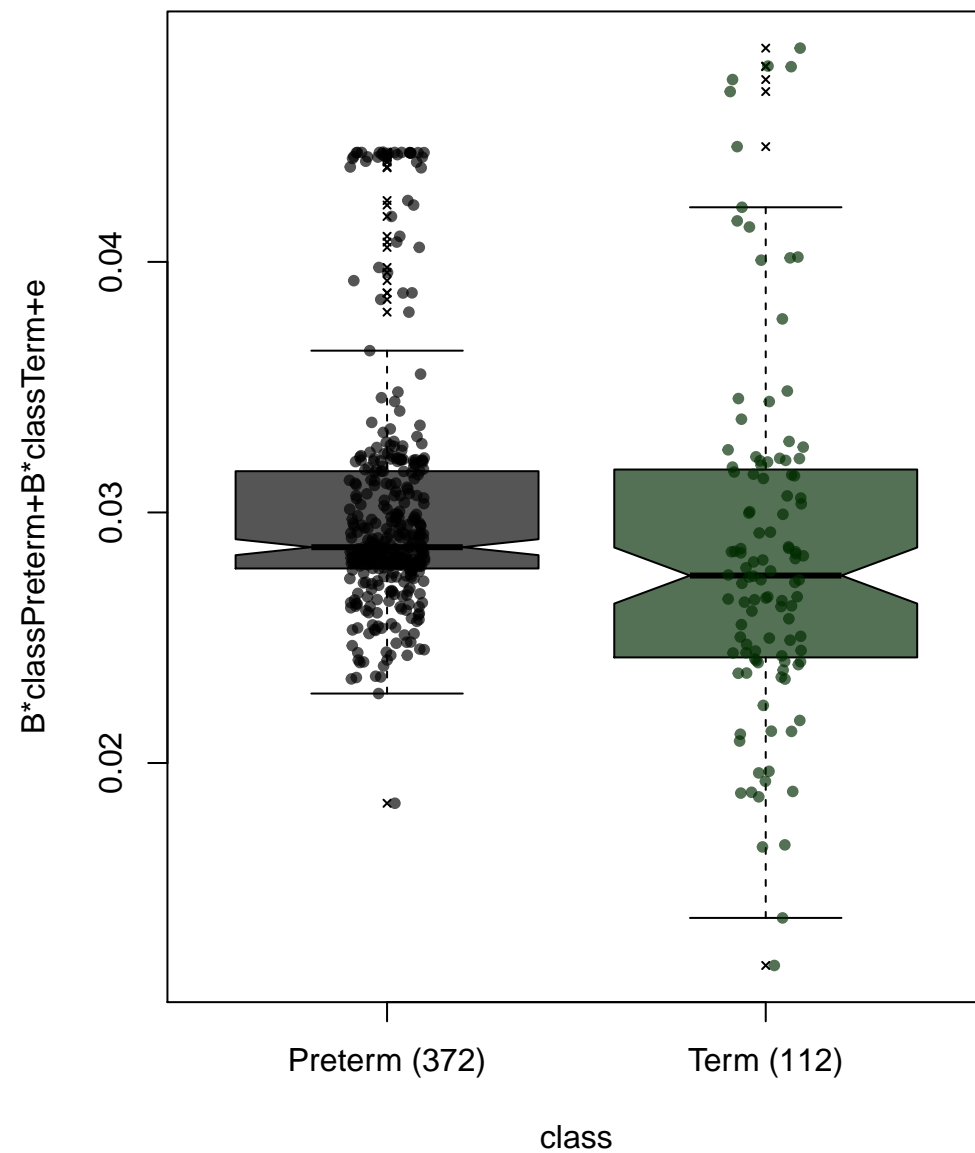

classTerm (0.000833 sd 0.000286, p=0.00374, q=0.00507)

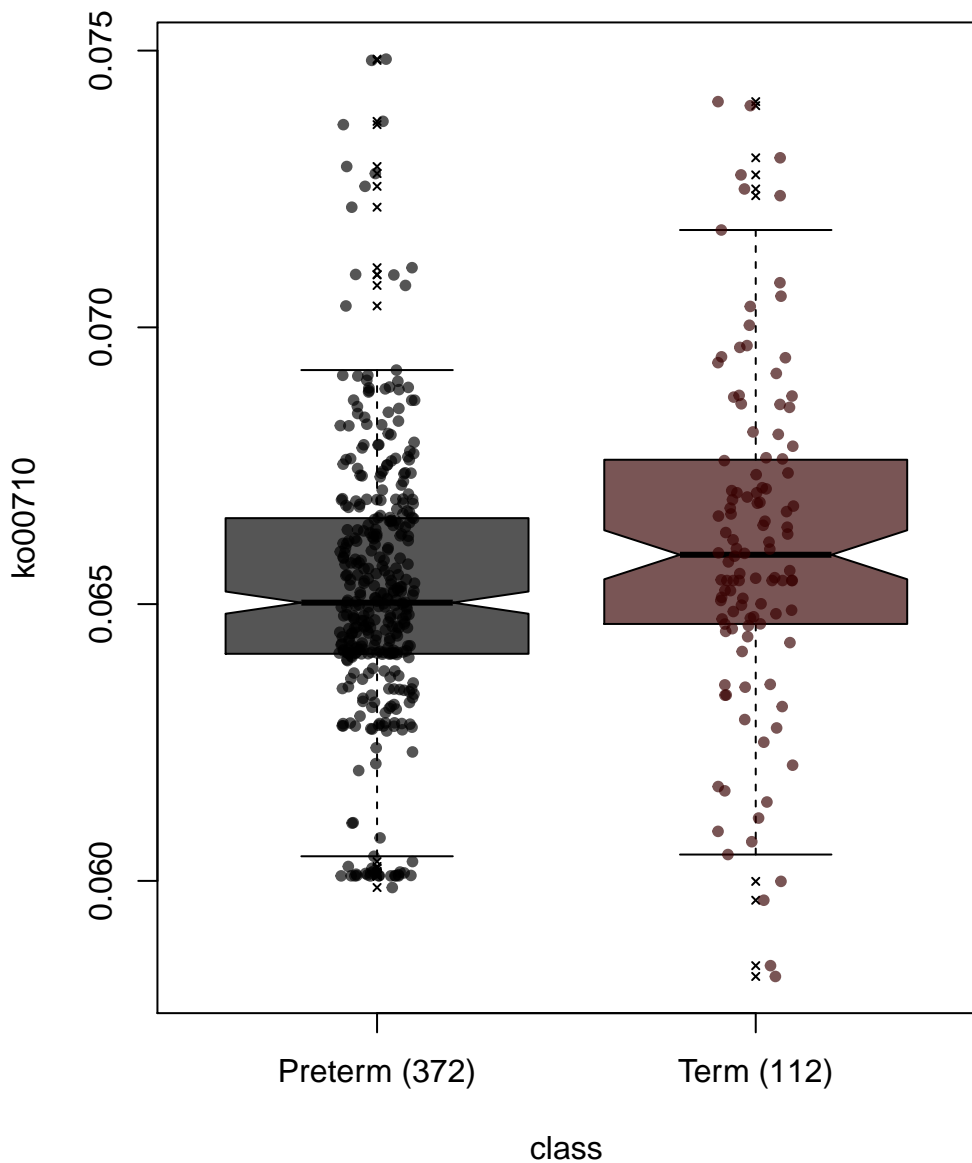

Partial Residual Plot

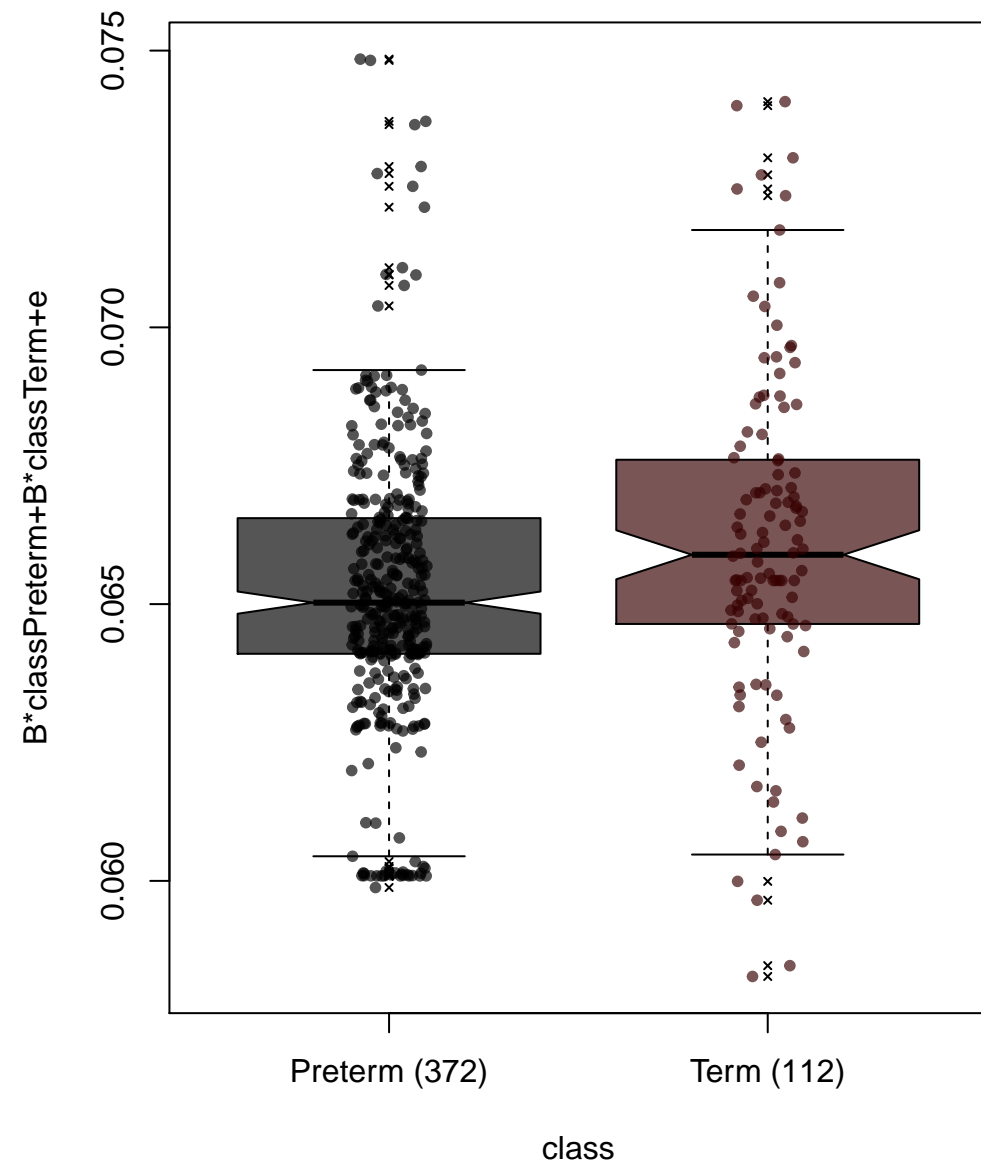

classTerm (0.000475 sd 0.000164, p=0.00381, q=0.00514)

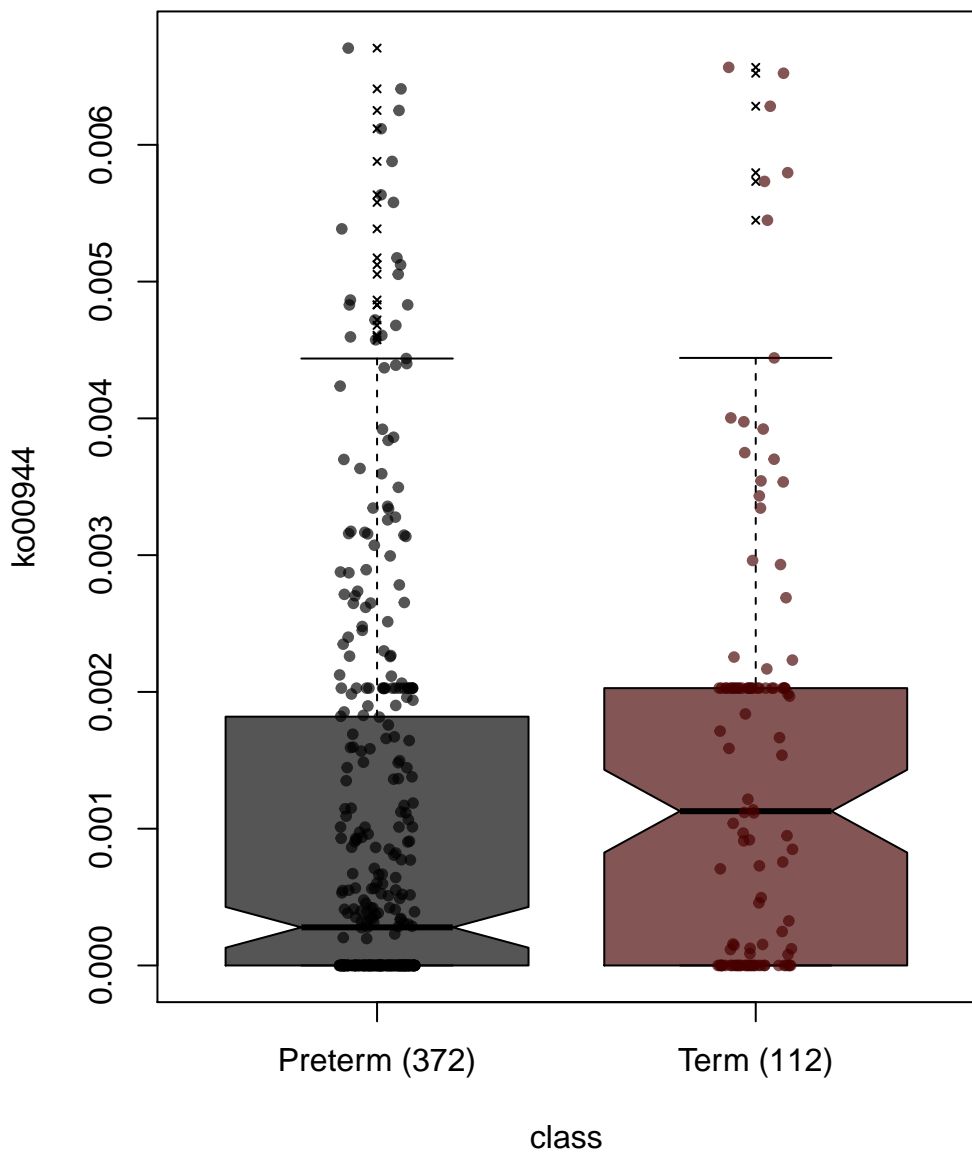

Partial Residual Plot

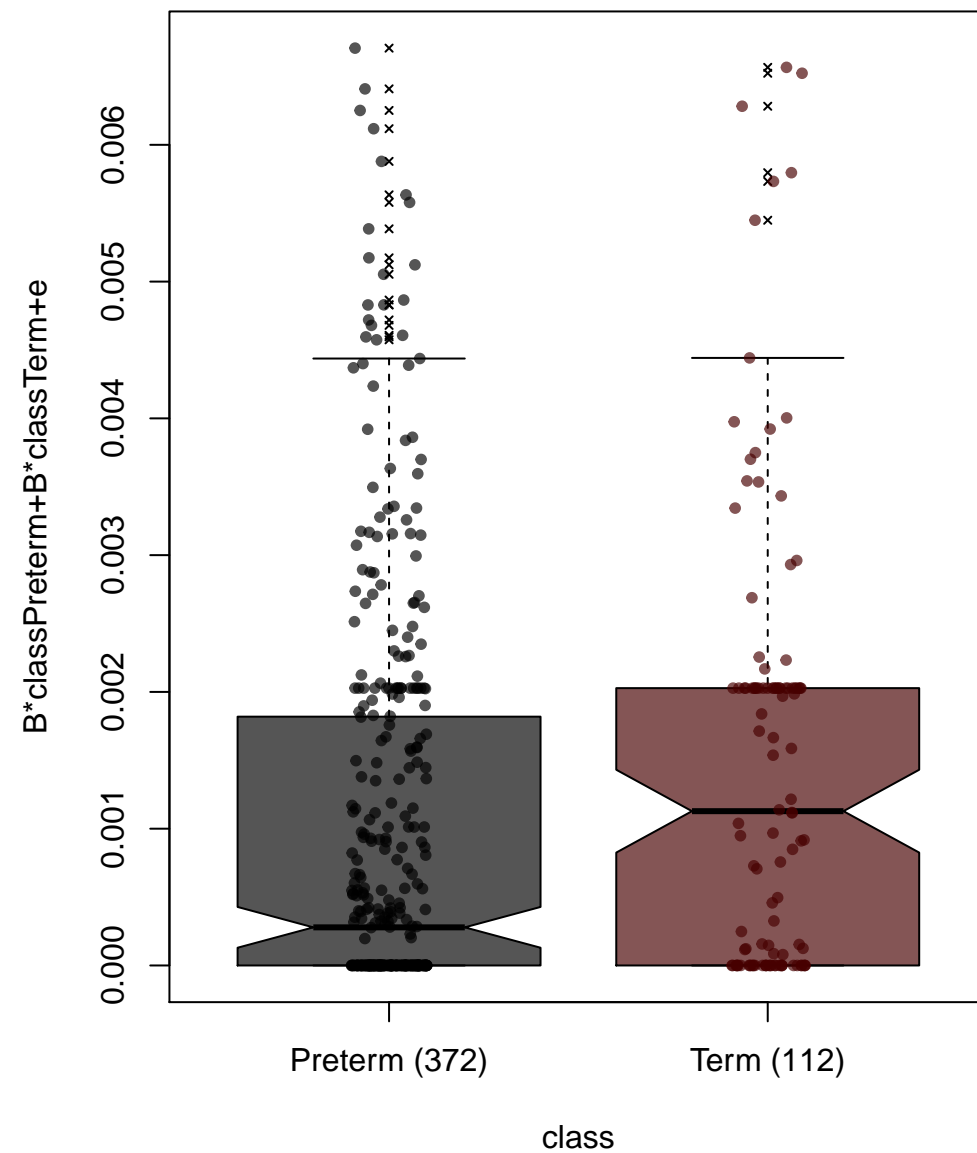

classTerm (0.00115 sd 0.000398, p=0.00415, q=0.00556)

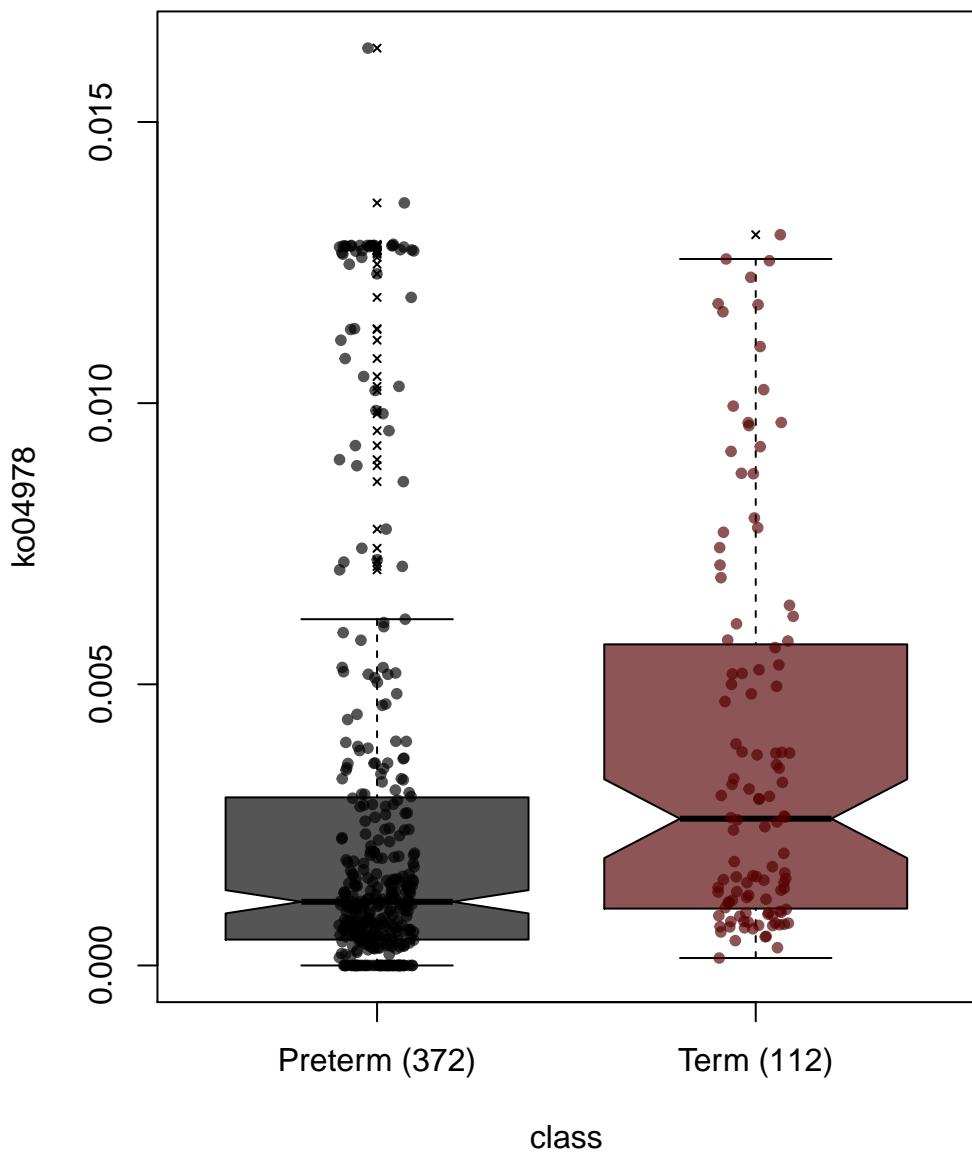

Partial Residual Plot

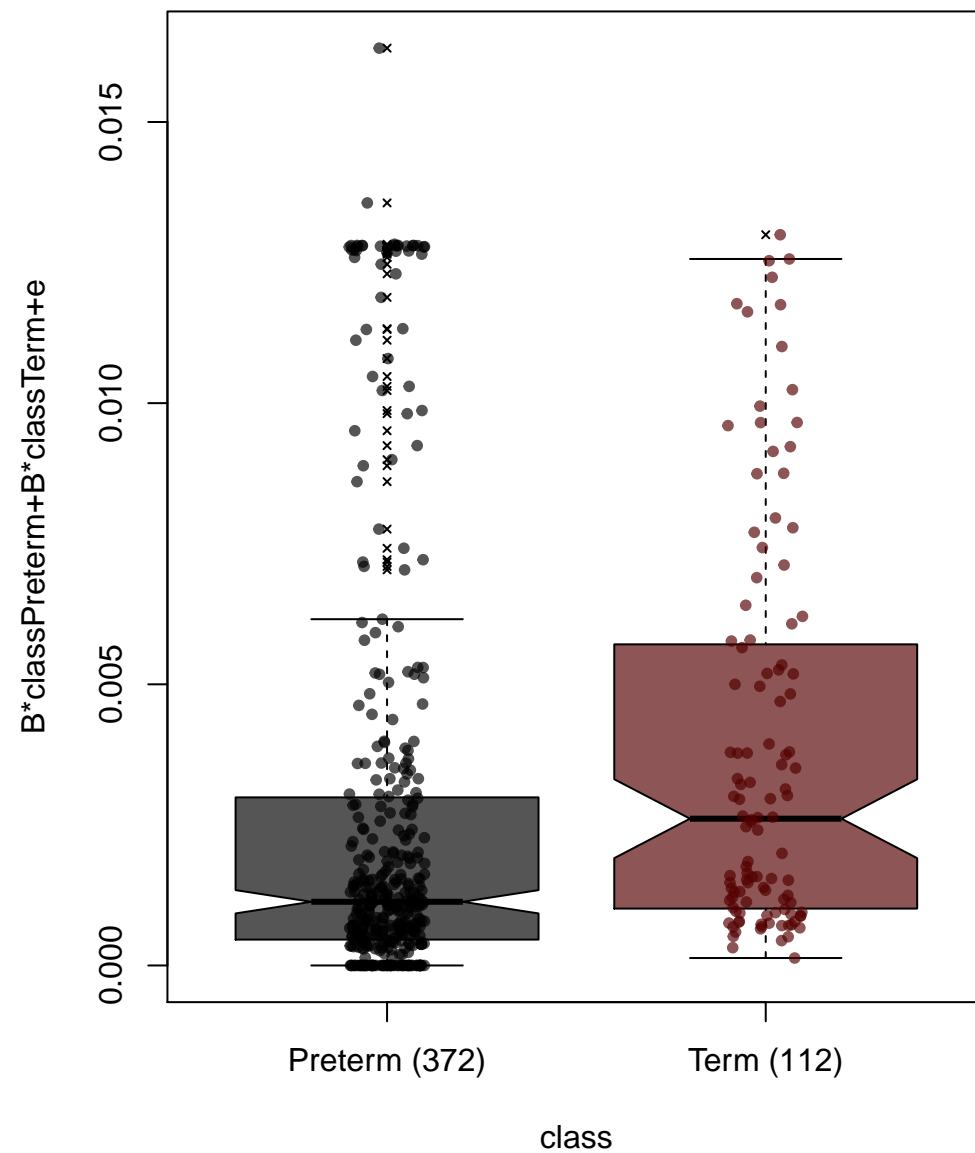

classTerm (0.00141 sd 0.000492, p=0.00434, q=0.00579)

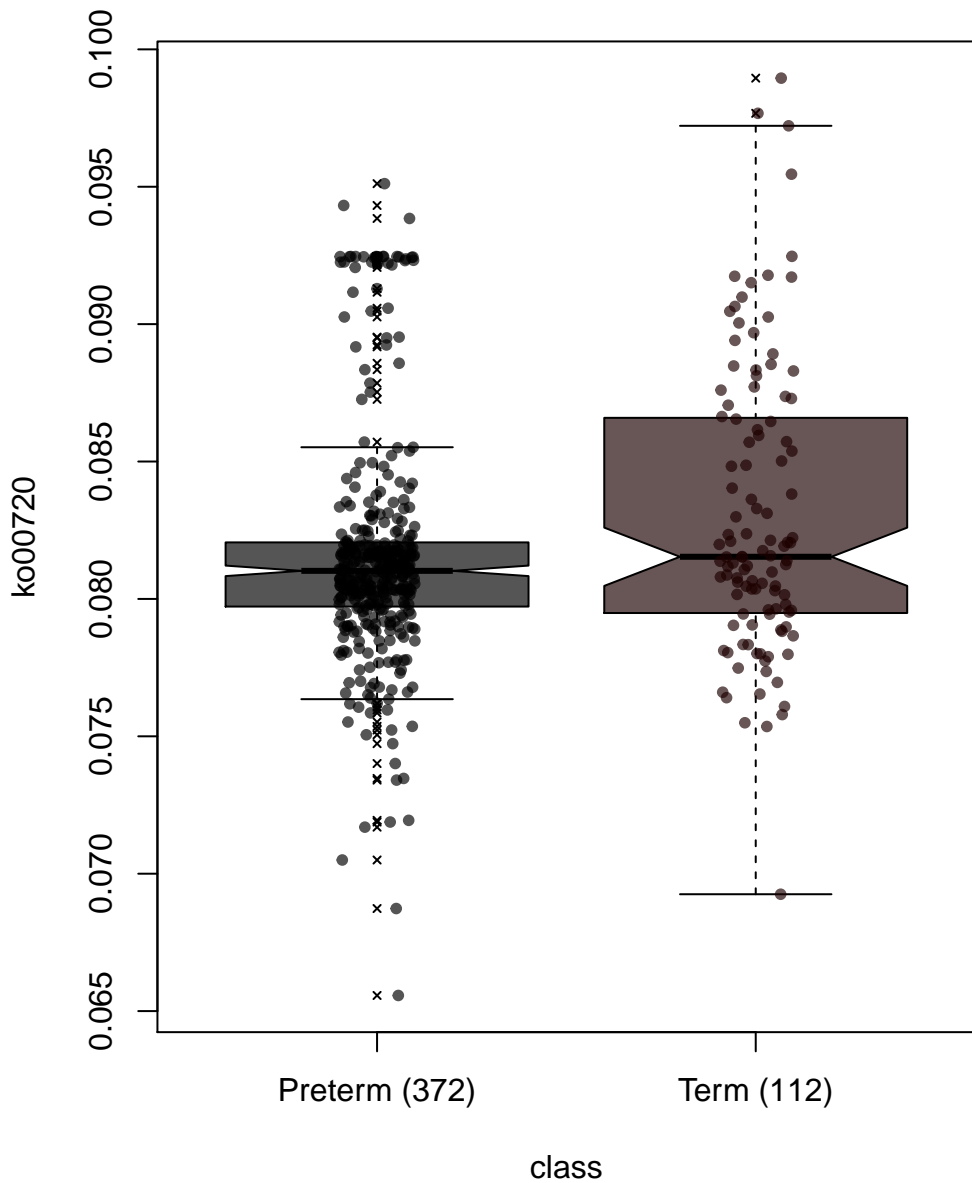

Partial Residual Plot

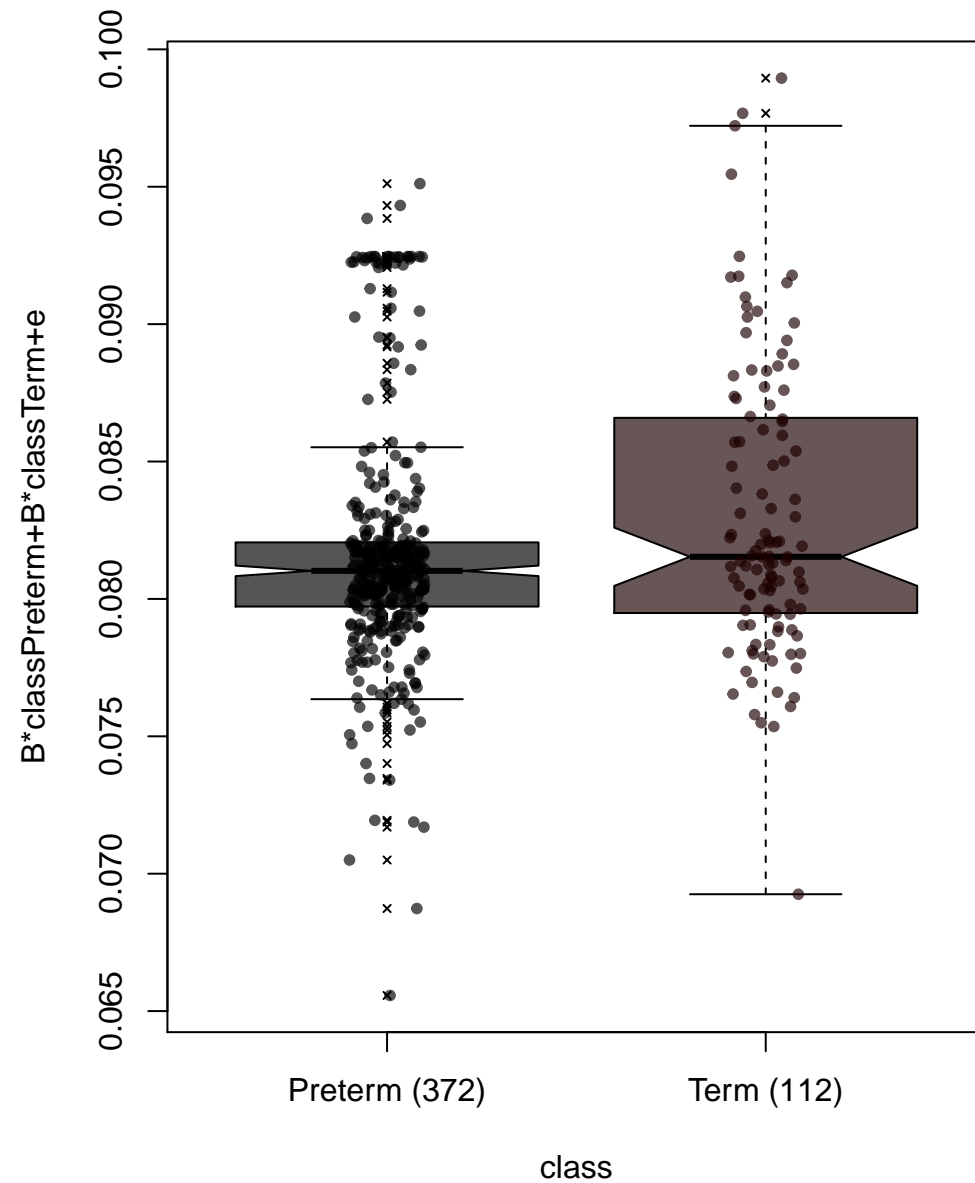

classTerm (−0.0013 sd 0.000454, p=0.00449, q=0.00596)

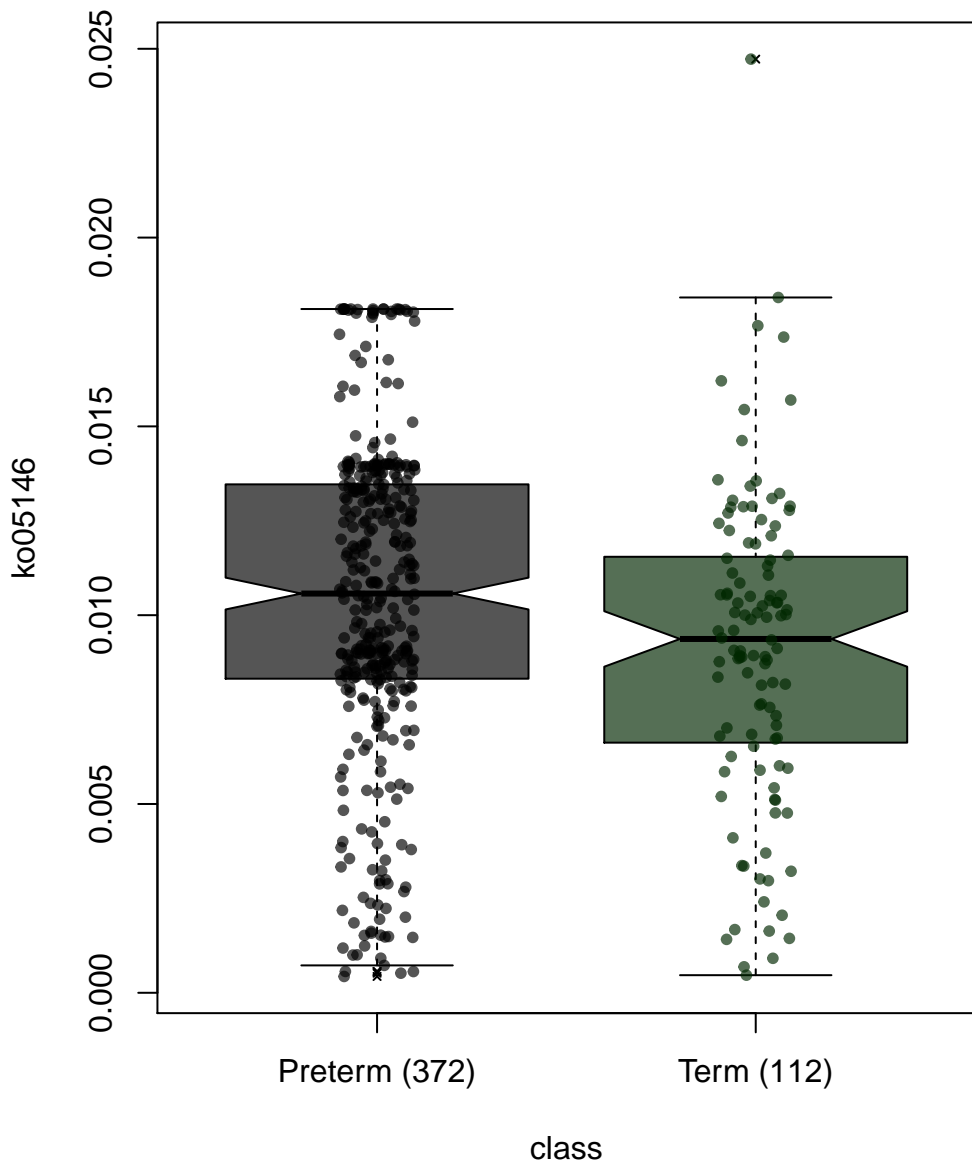

Partial Residual Plot

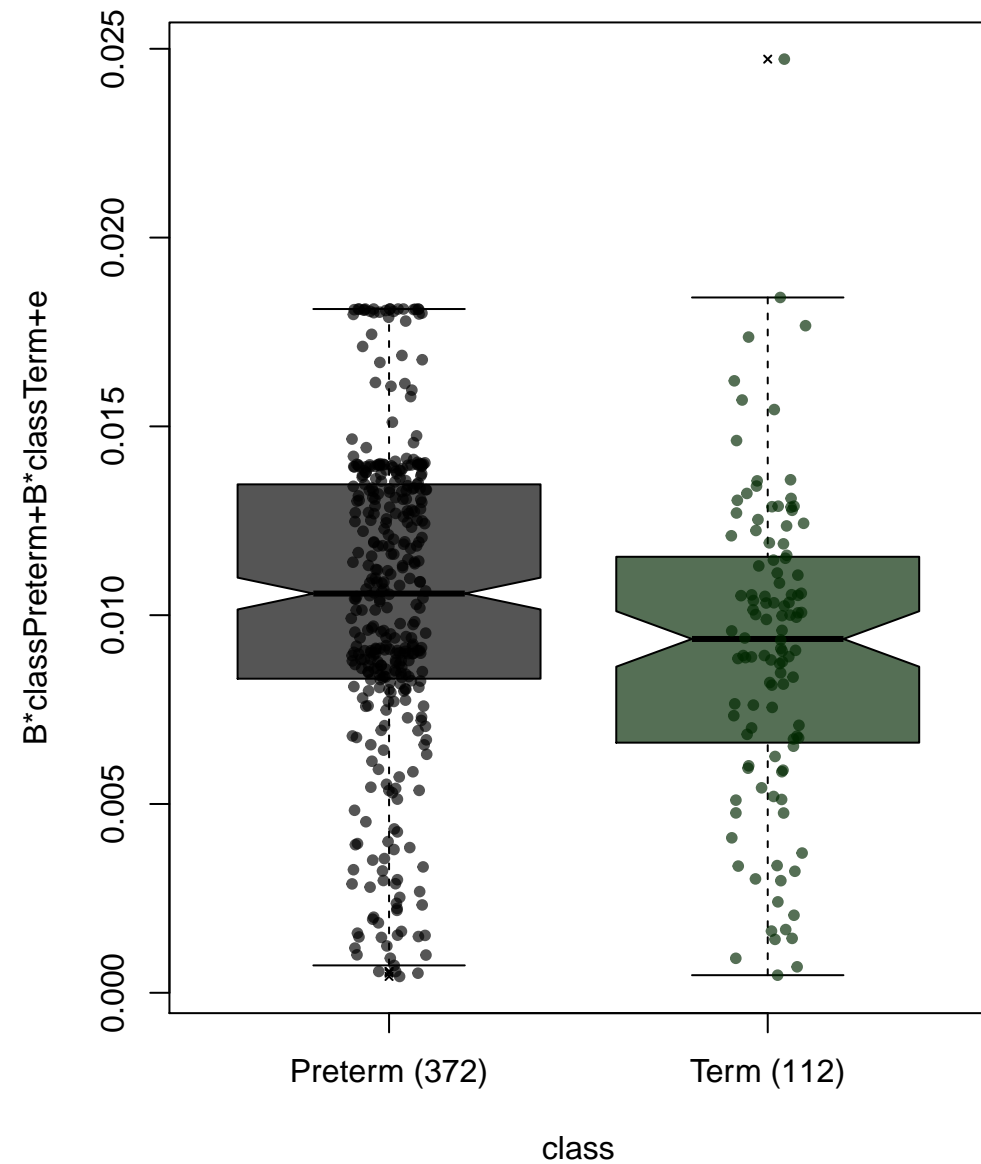

classTerm (0.00155 sd 0.000548, p=0.00485, q=0.00641)

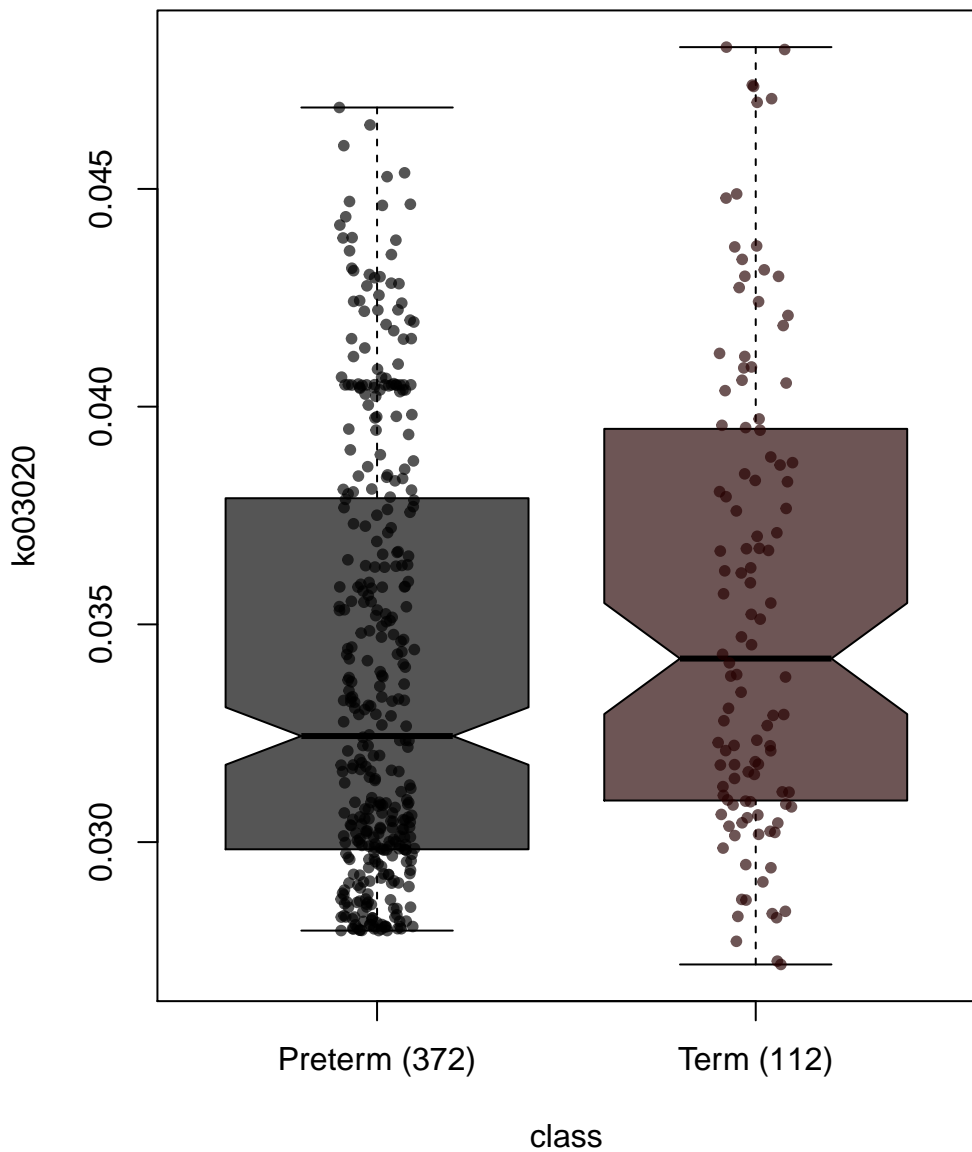

Partial Residual Plot

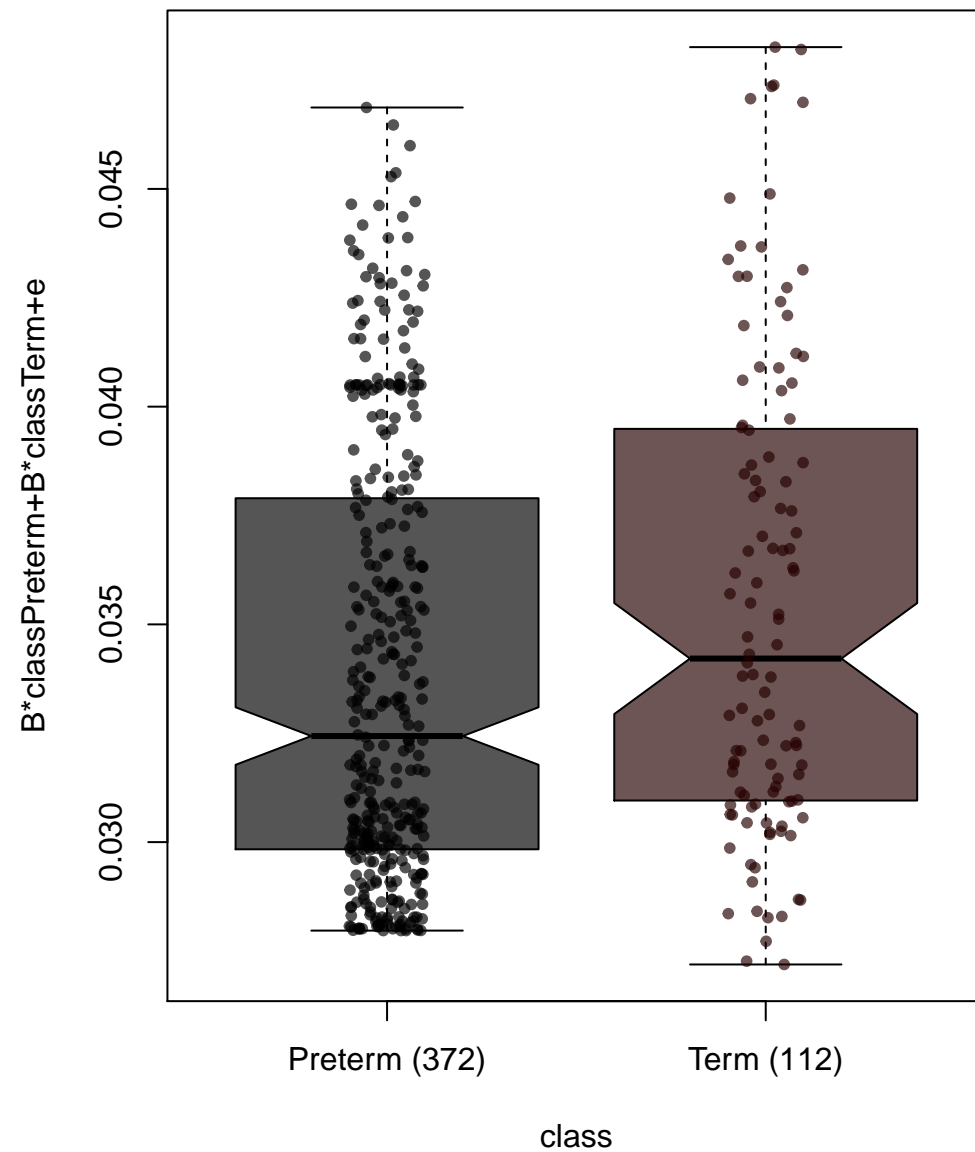



classTerm ( $-0.00262$  sd  $0.000937$ ,  $p=0.00538$ ,  $q=0.00708$ )

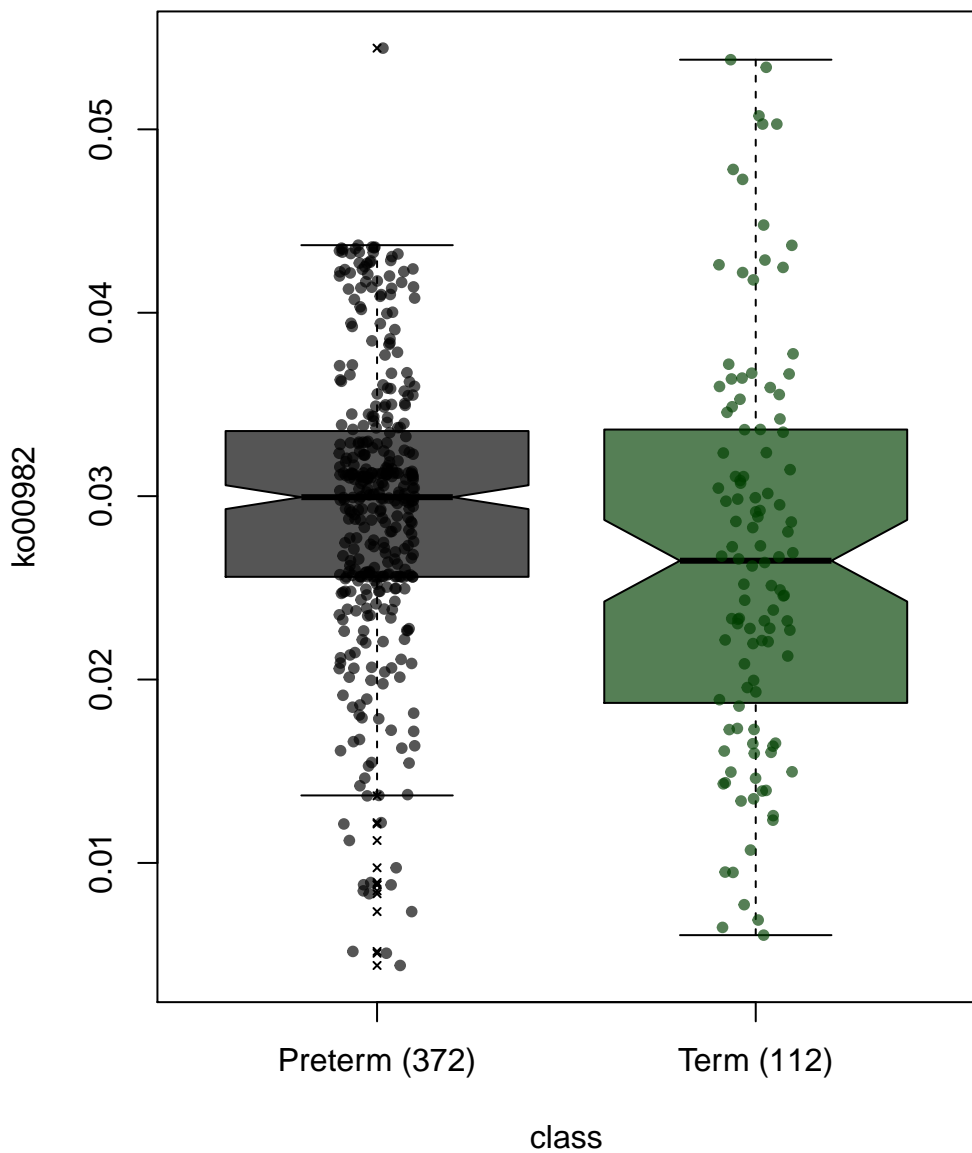

Partial Residual Plot

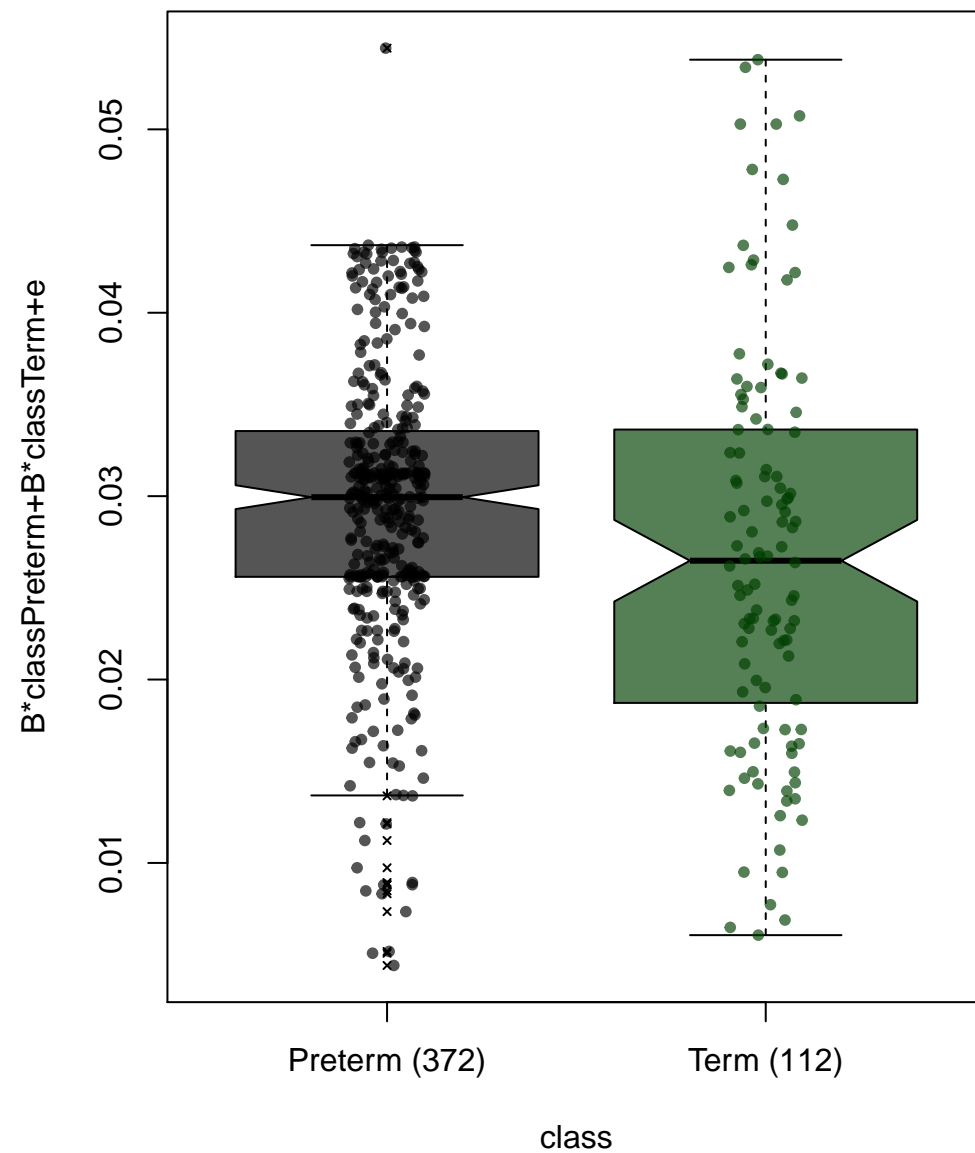

classTerm ( $-0.00727$  sd  $0.00268$ ,  $p=0.00695$ ,  $q=0.00902$ )

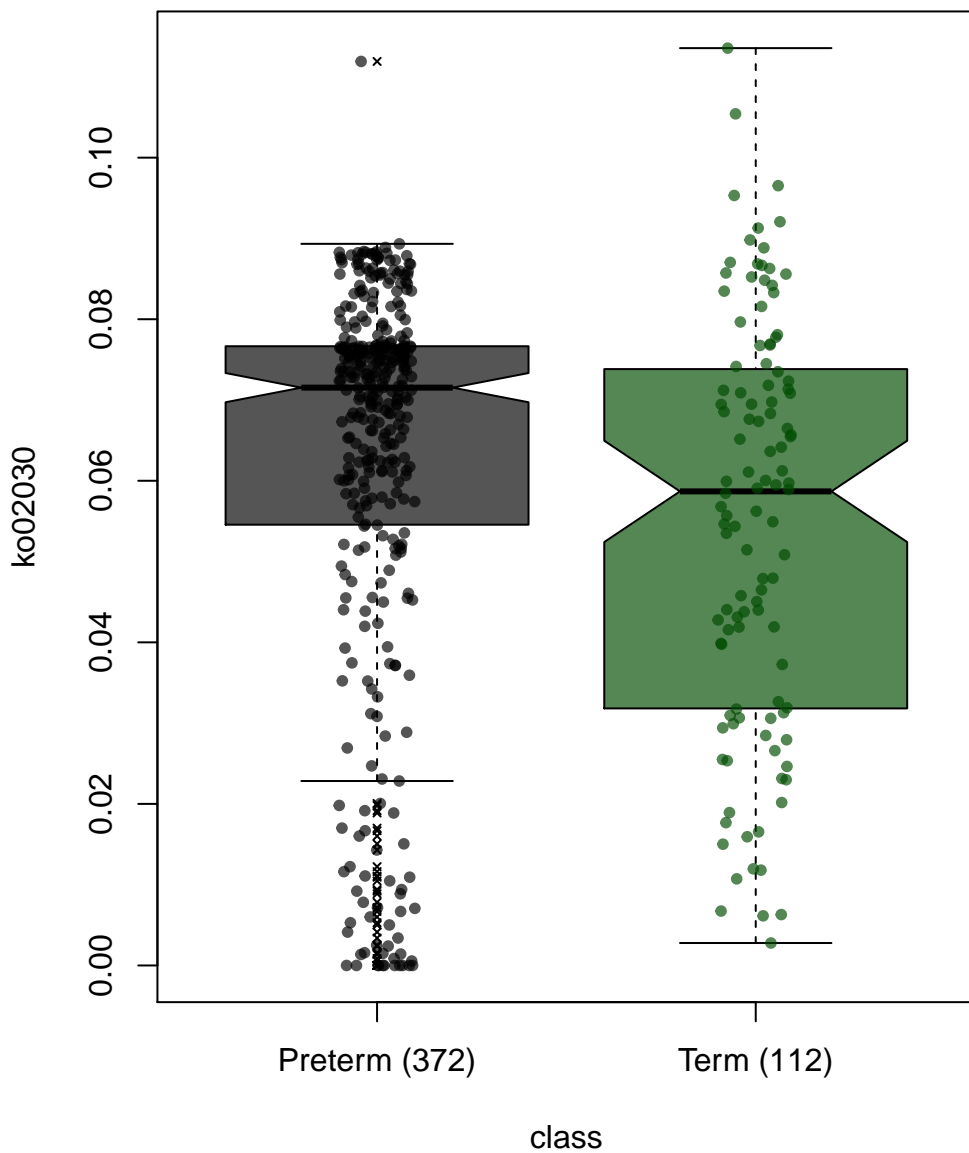

Partial Residual Plot

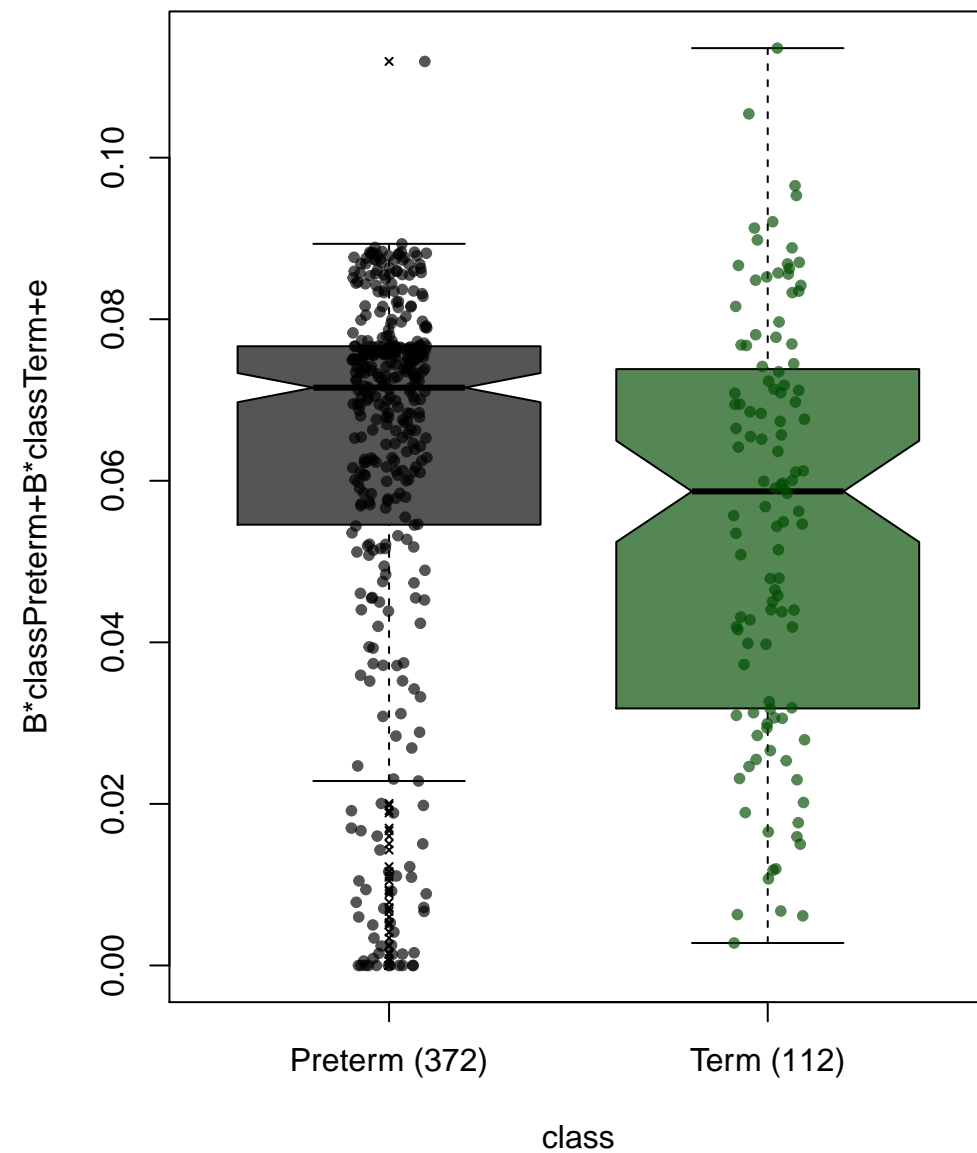

classTerm (0.000124 sd 4.59e-05, p=0.00701, q=0.00902)

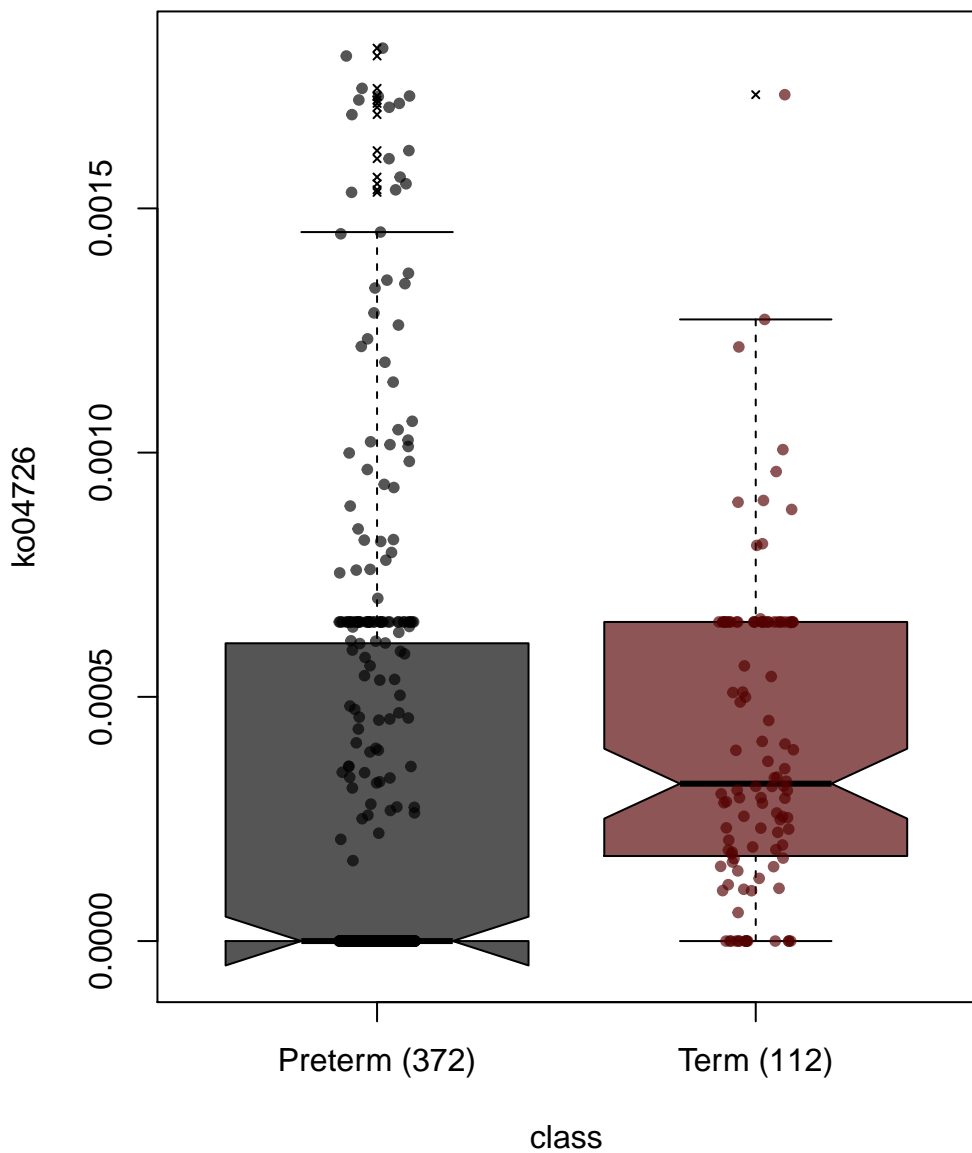

Partial Residual Plot

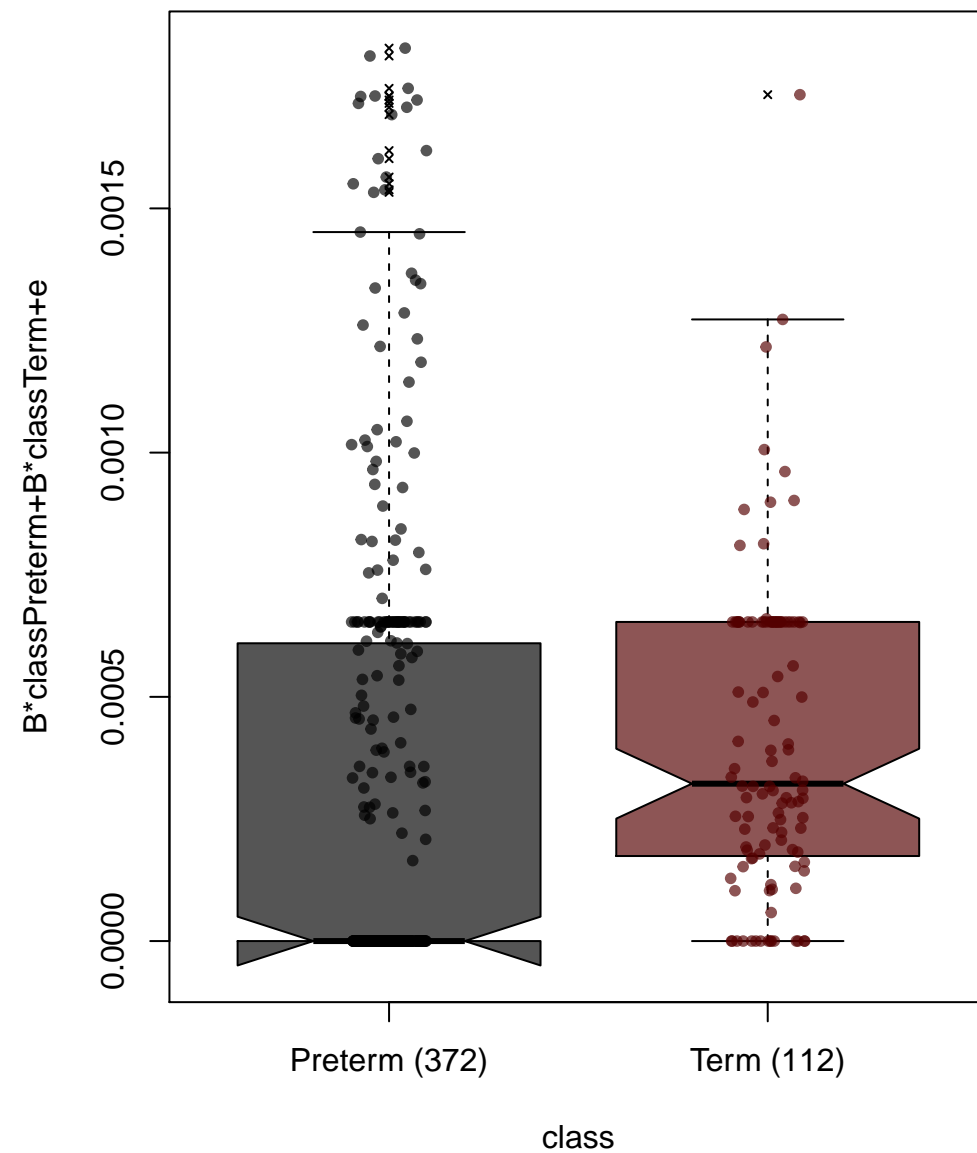

classTerm (0.000124 sd 4.59e-05, p=0.00701, q=0.00902)

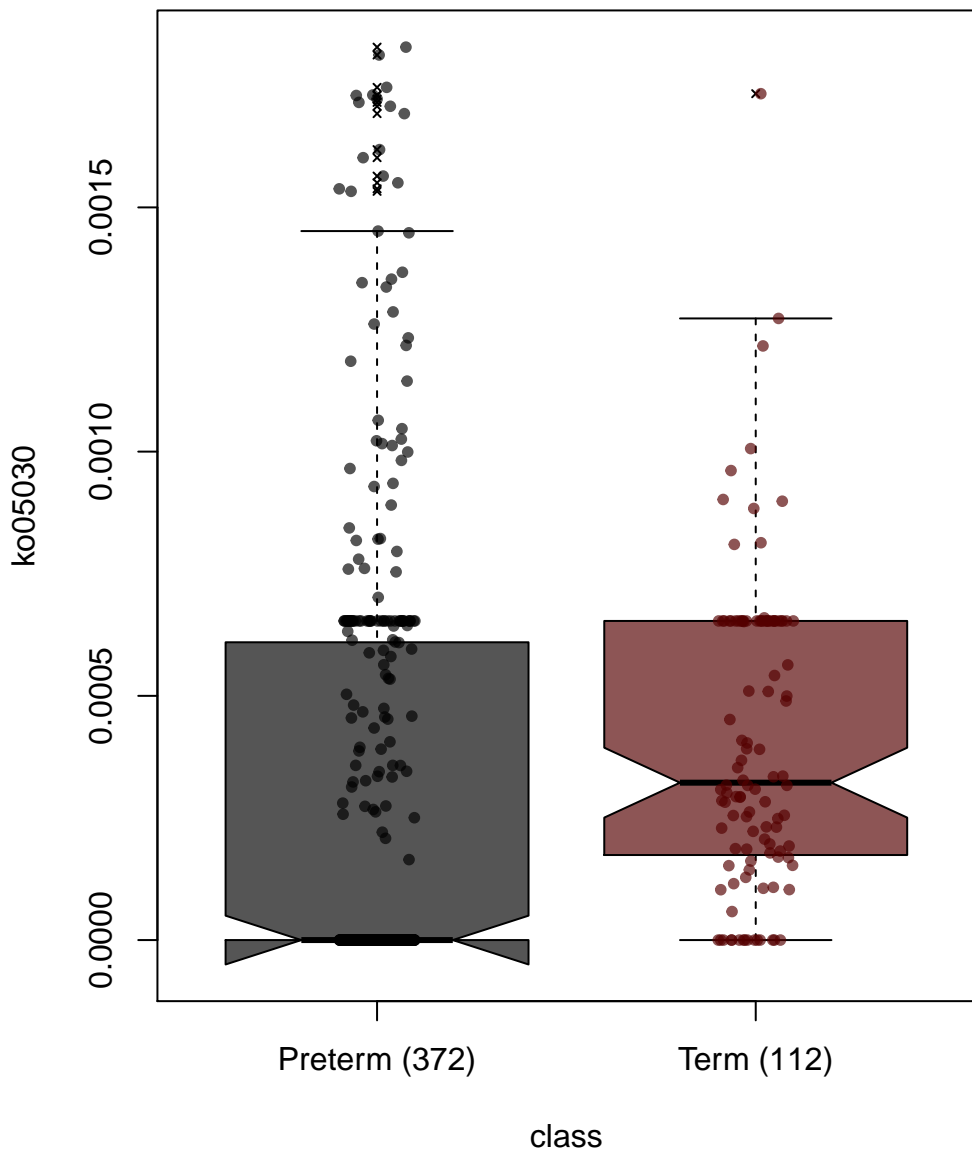

Partial Residual Plot

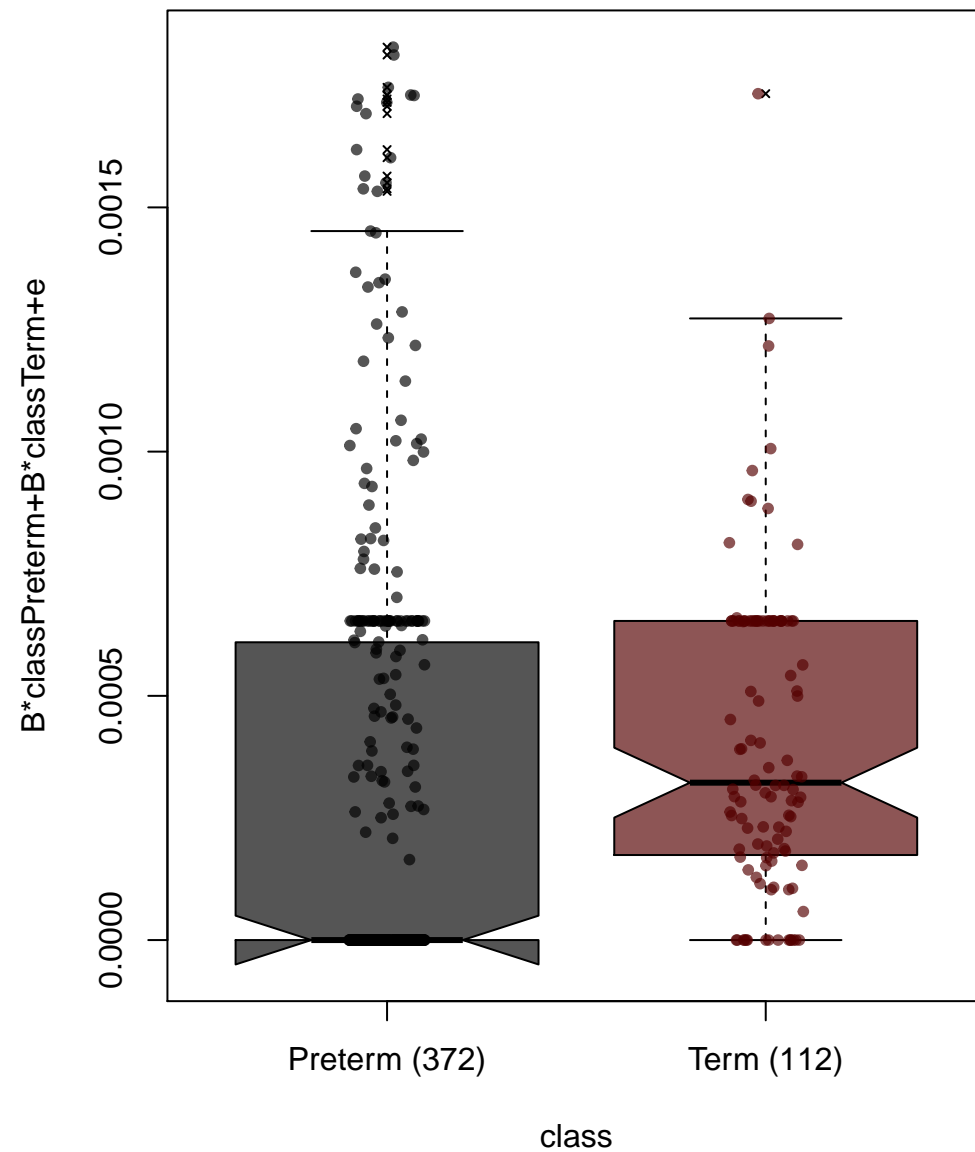

classTerm (0.000124 sd 4.59e-05, p=0.00701, q=0.00902)

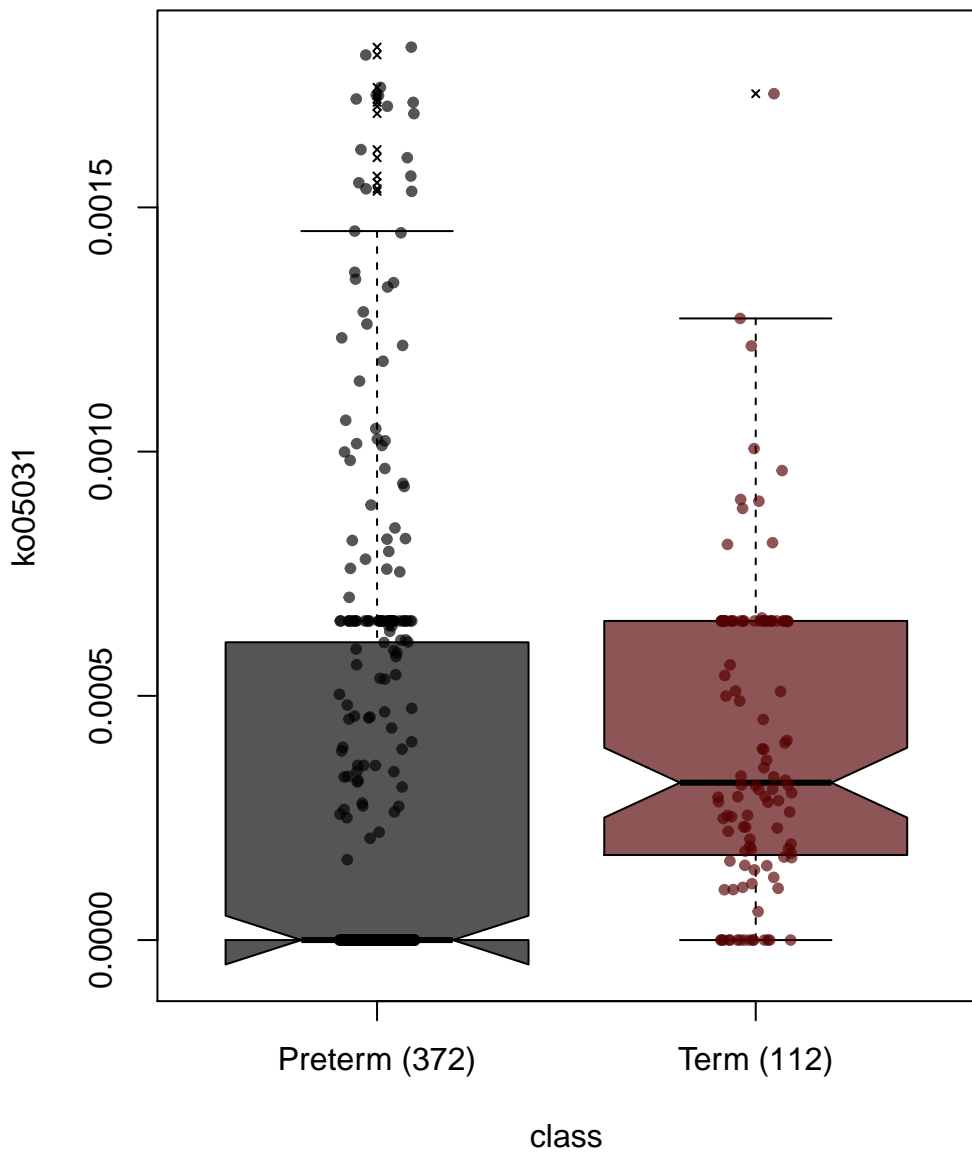

Partial Residual Plot

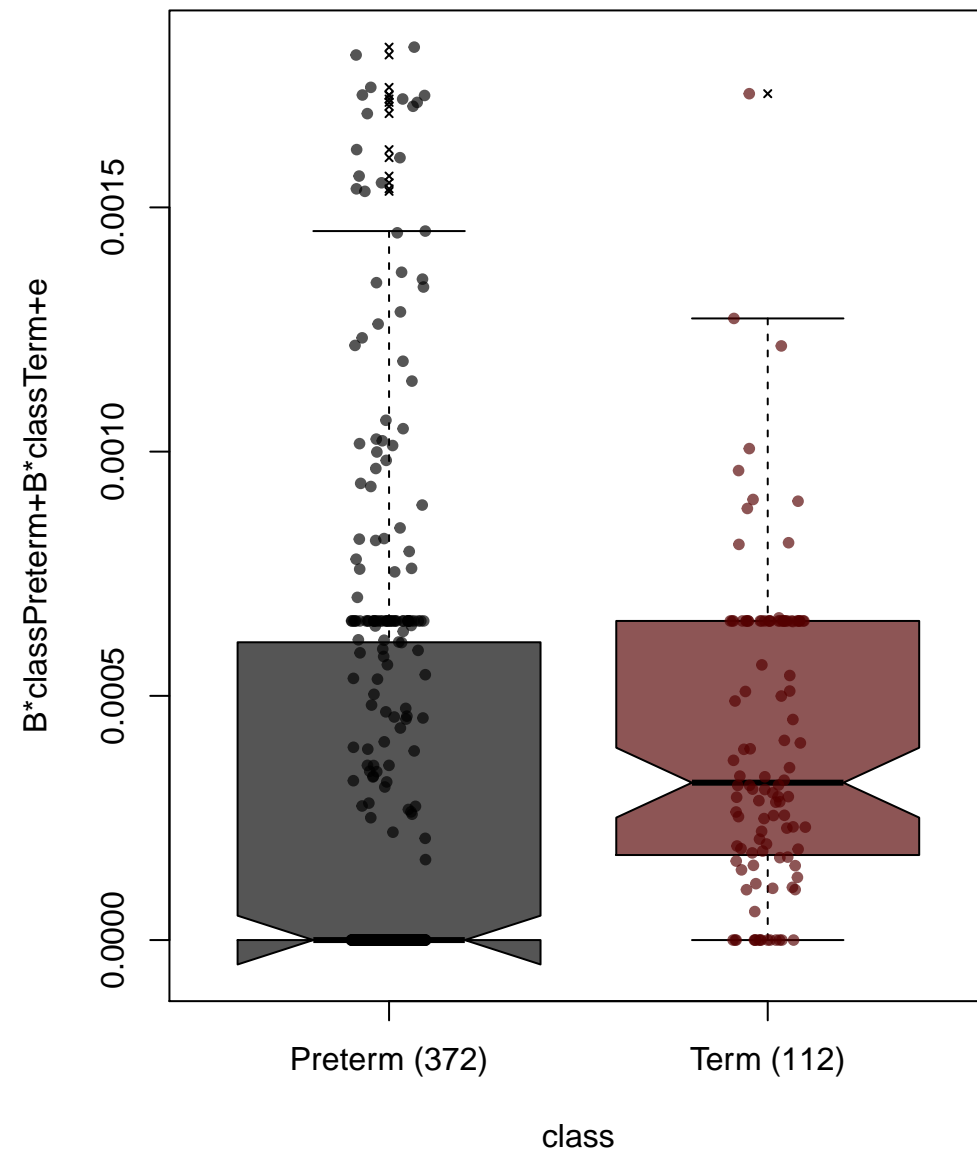

classTerm (0.000124 sd 4.59e-05, p=0.00701, q=0.00902)

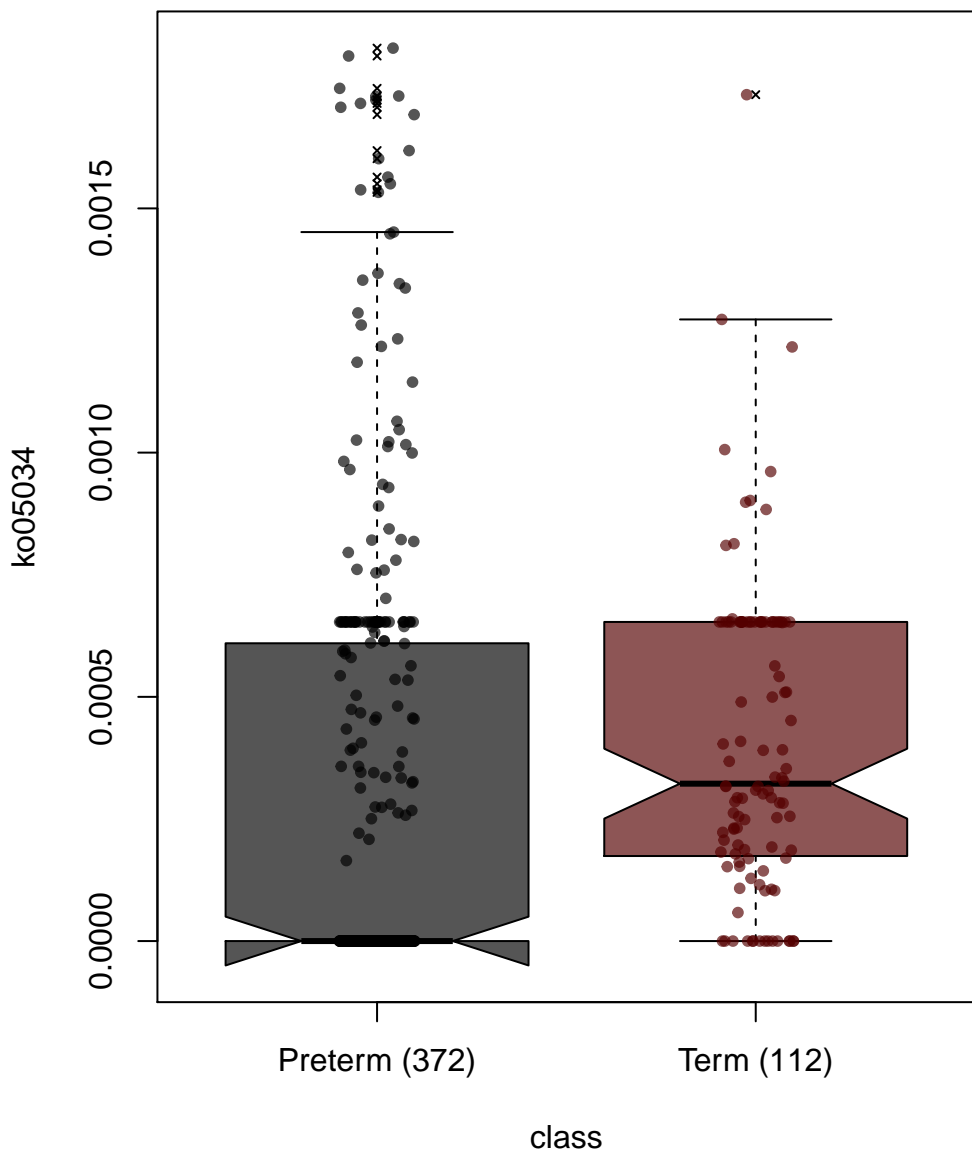

Partial Residual Plot

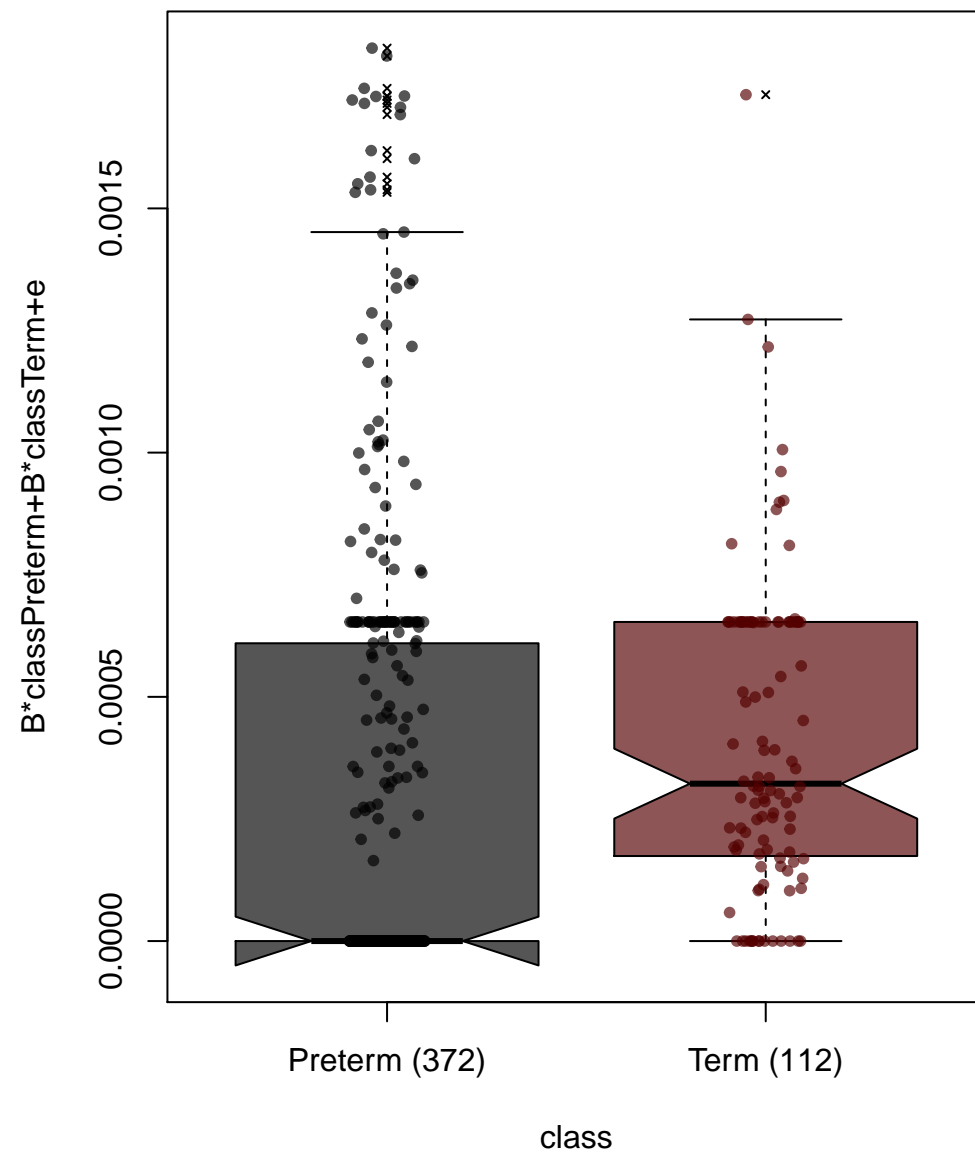

classTerm (0.000124 sd 4.59e-05, p=0.00714, q=0.00914)

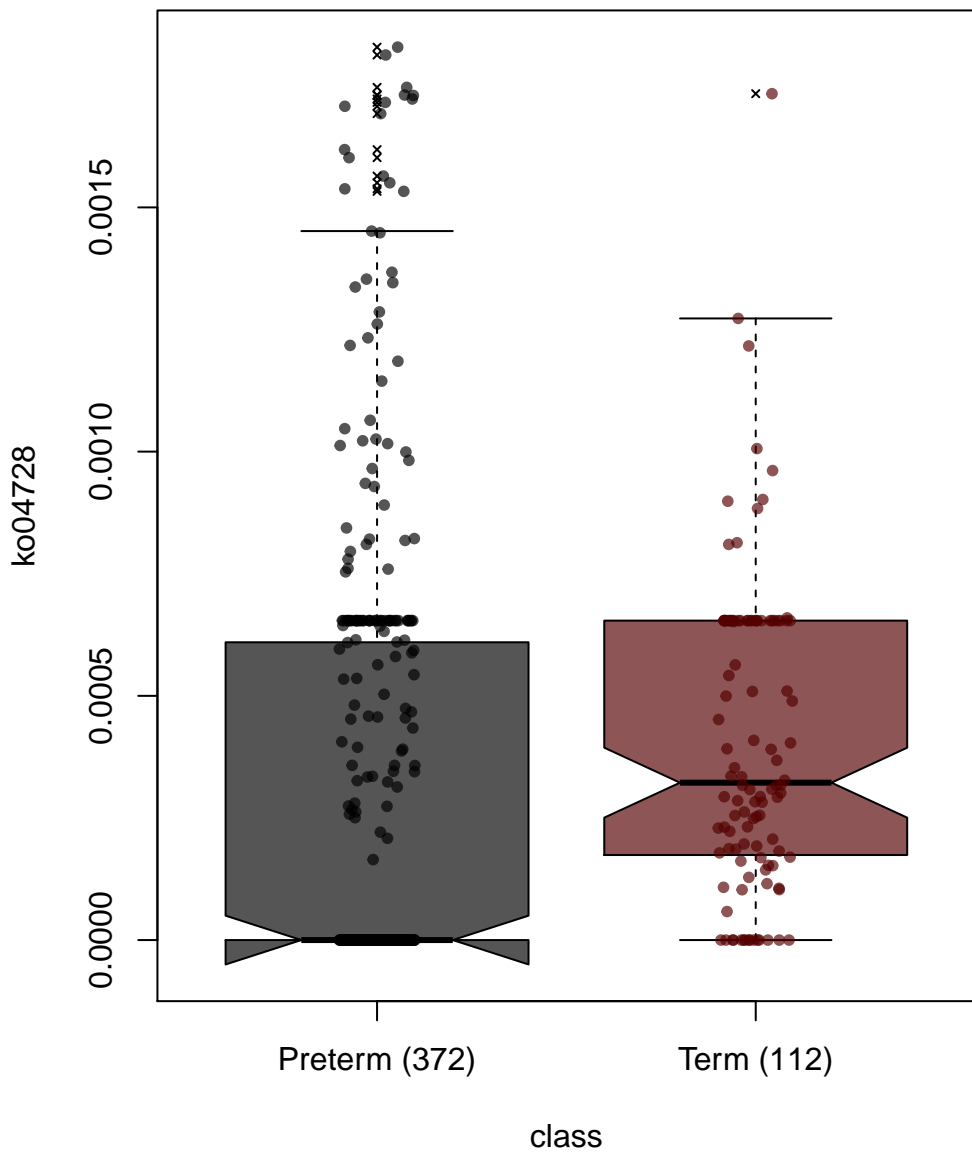

Partial Residual Plot

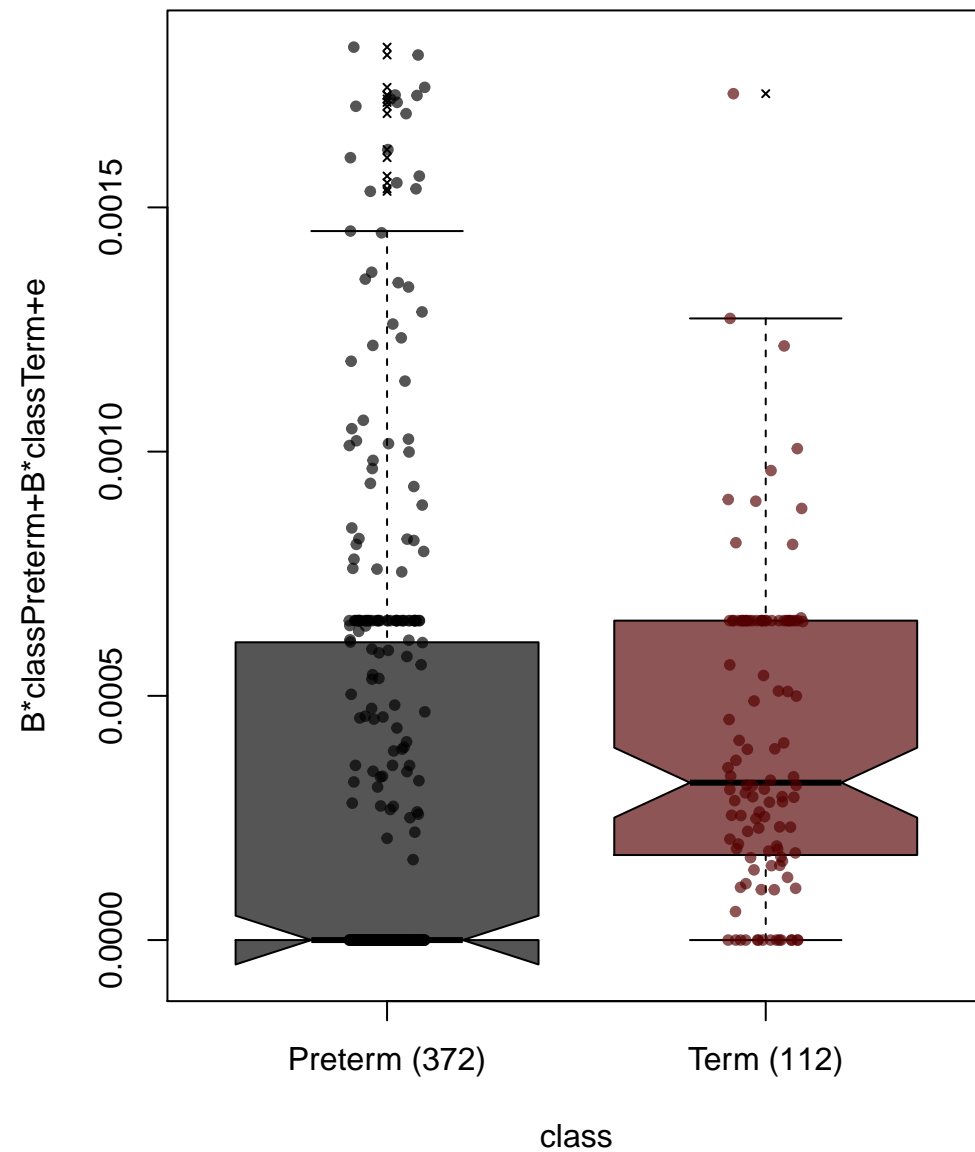

classTerm (−0.0021 sd 0.000819, p=0.0106, q=0.0135)

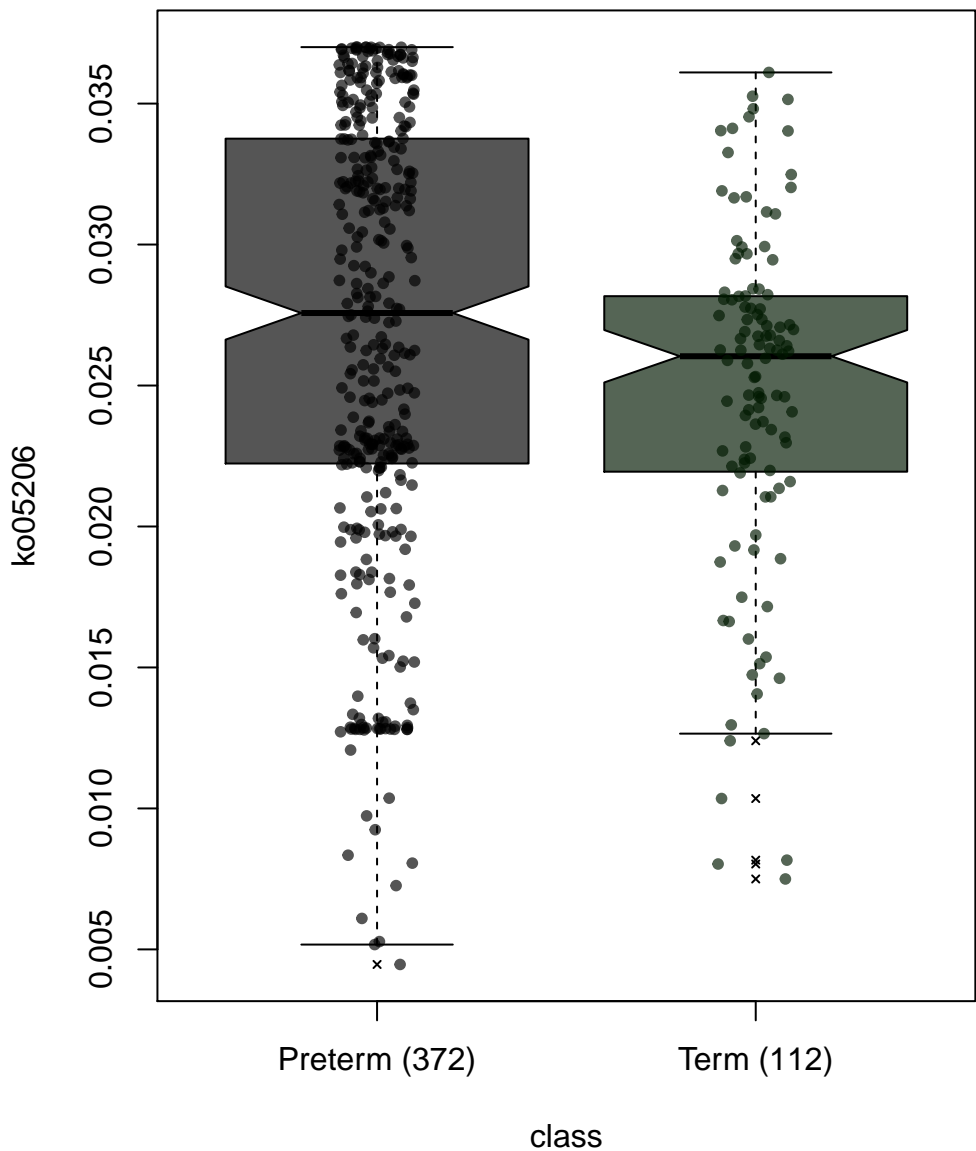

Partial Residual Plot

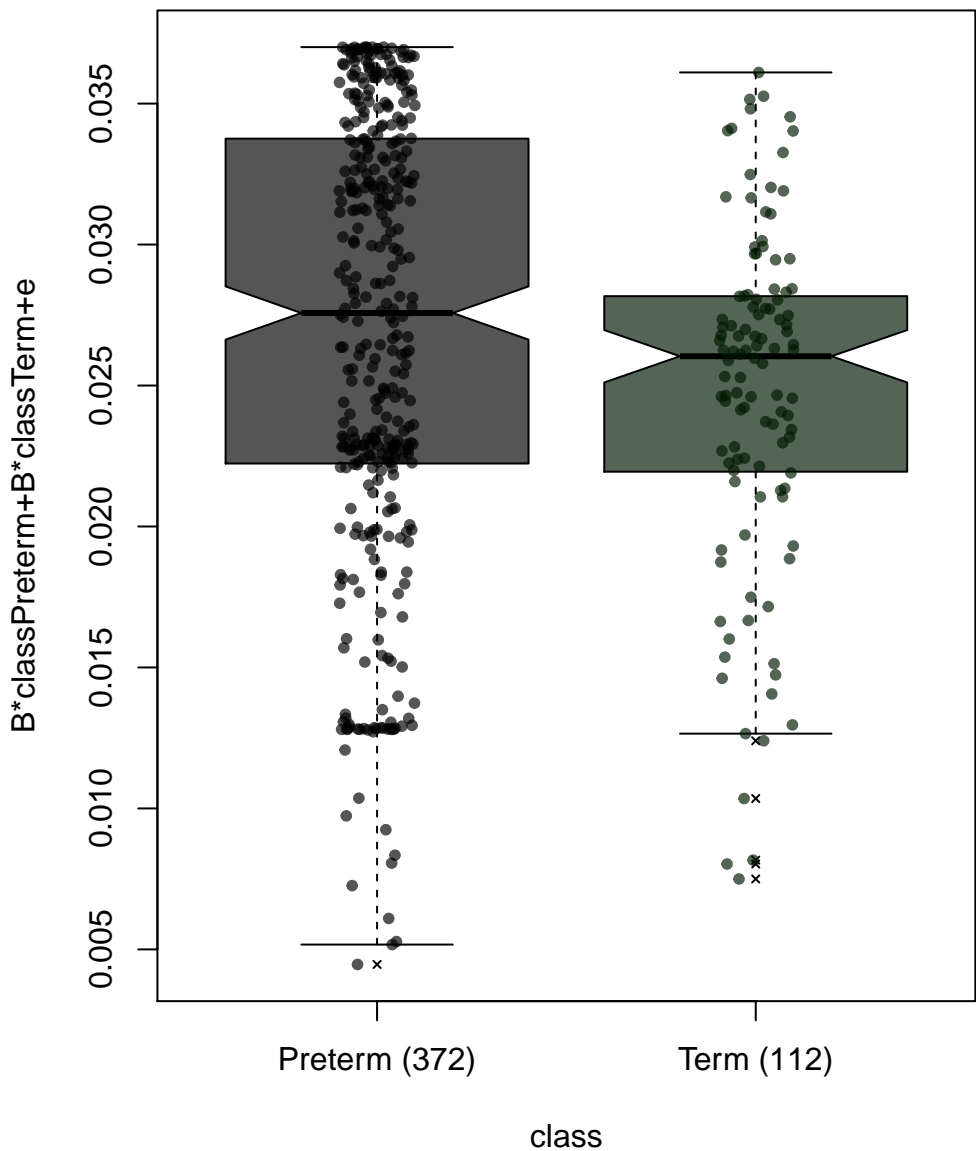



classTerm (0.00109 sd 0.000433, p=0.0123, q=0.0156)

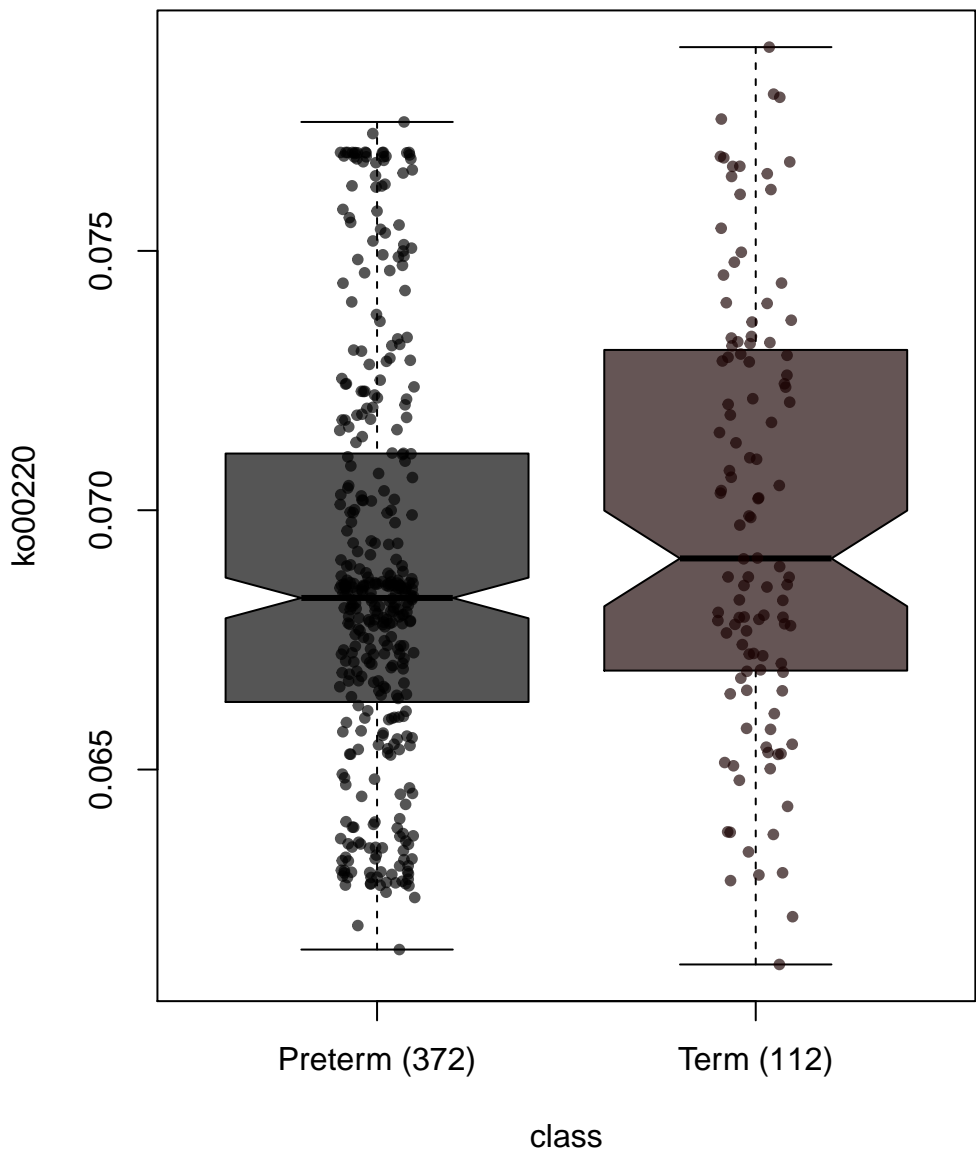

Partial Residual Plot

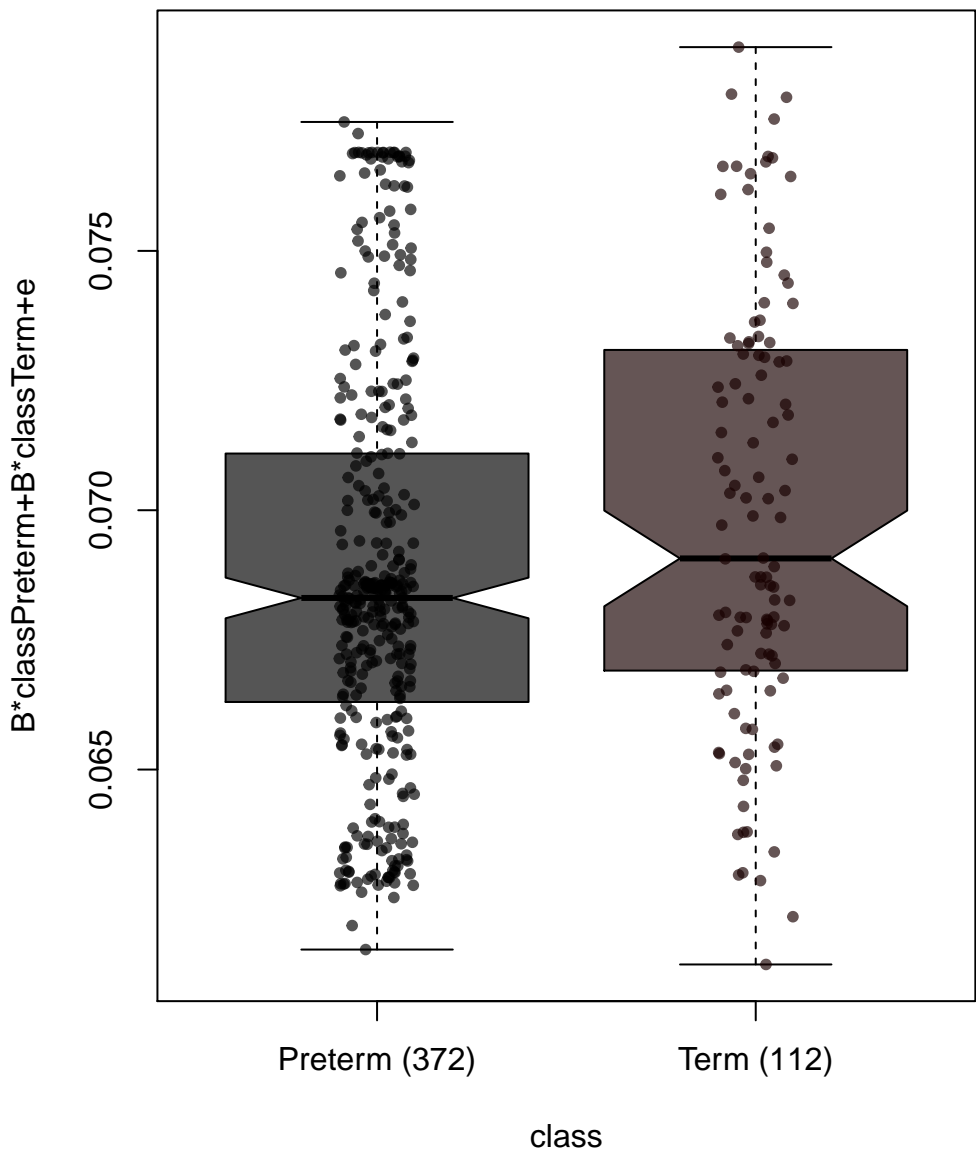

classTerm (-0.001 sd 0.000402, p=0.0129, q=0.0163)

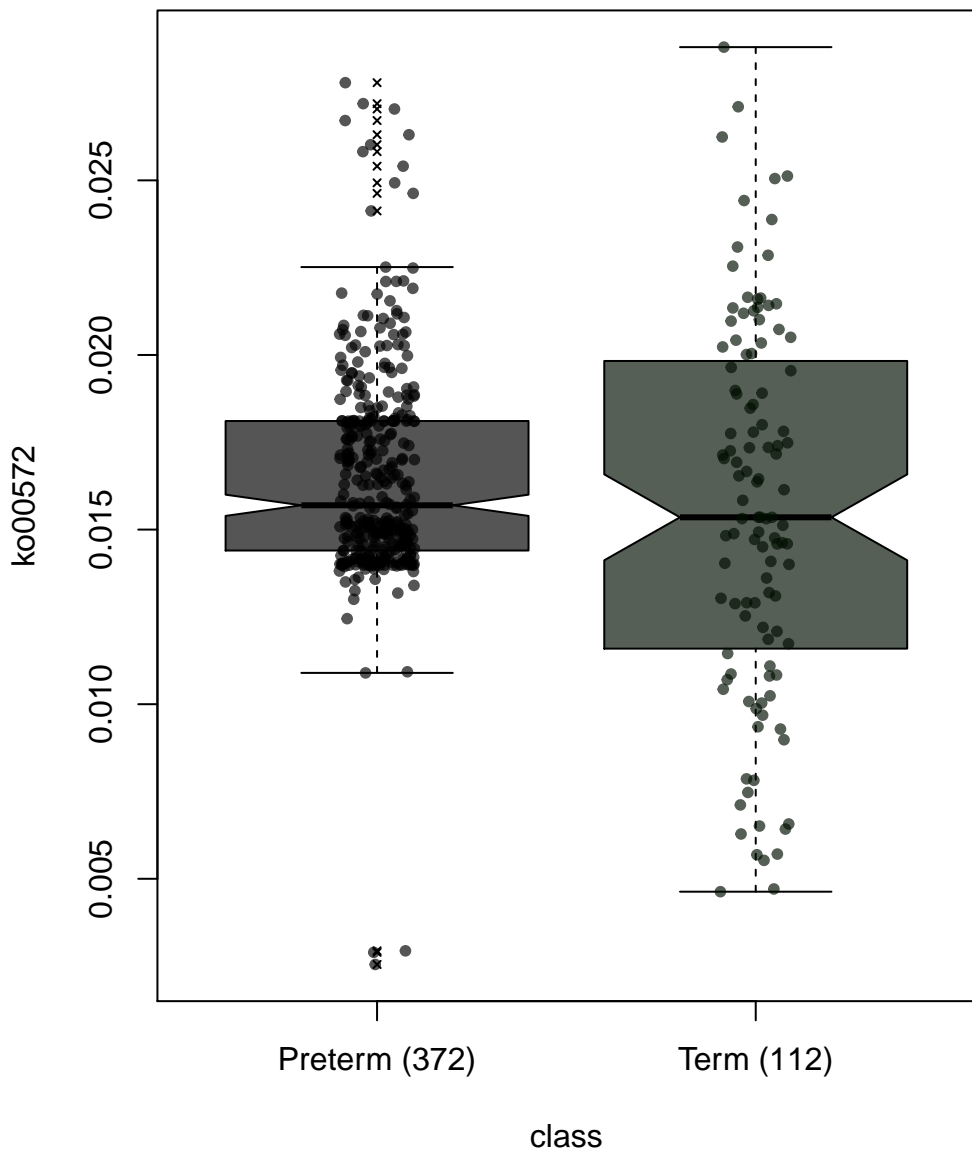

Partial Residual Plot

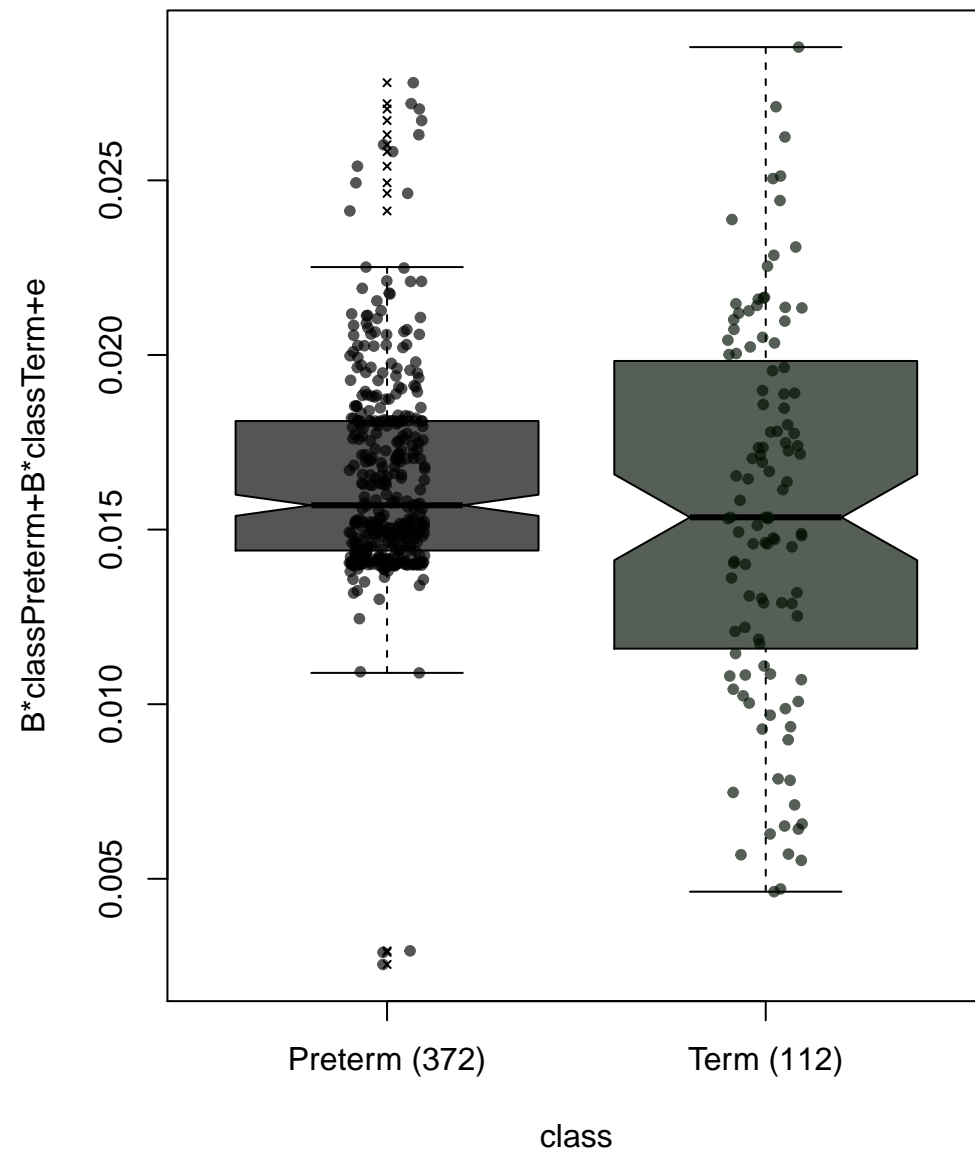

classTerm (−0.00292 sd 0.00119, p=0.0144, q=0.0182)

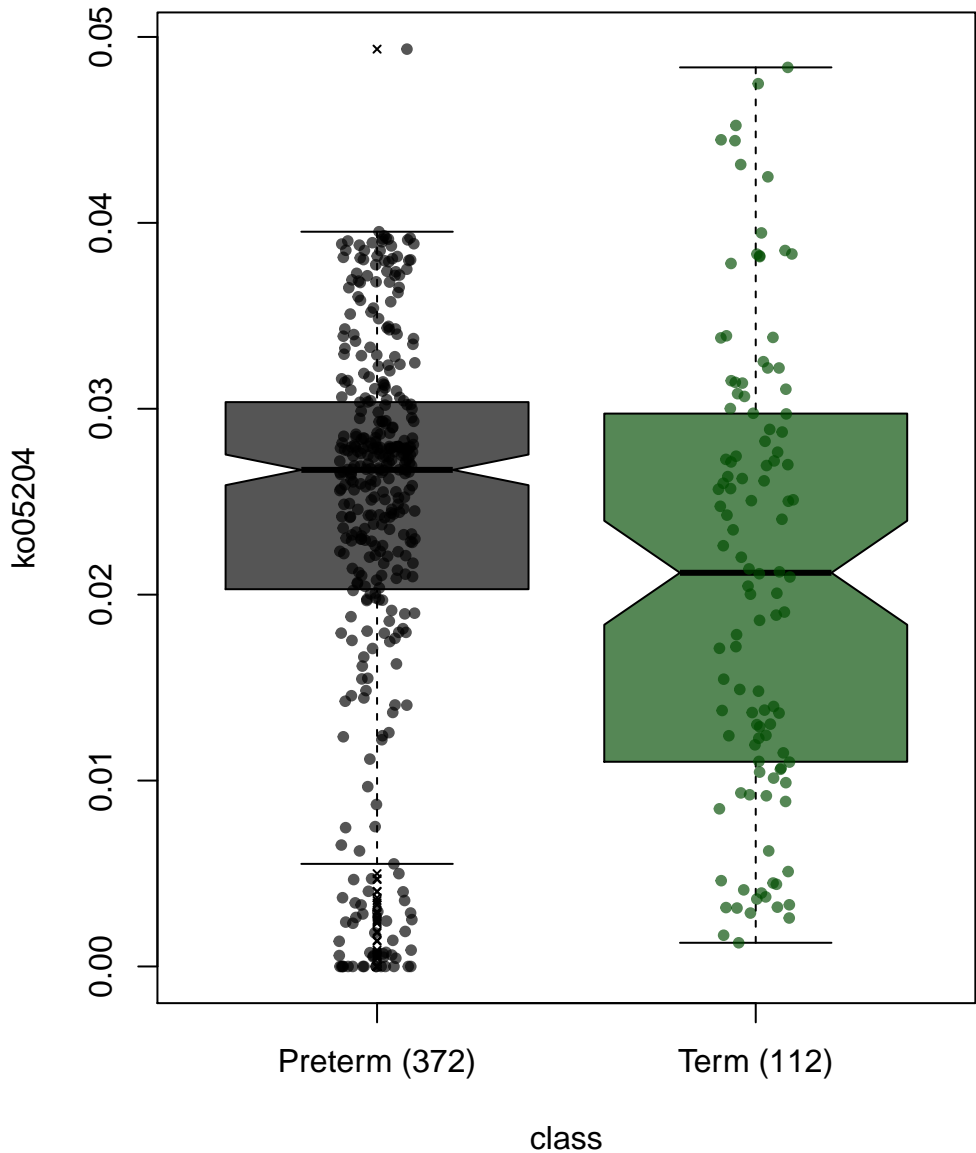

Partial Residual Plot

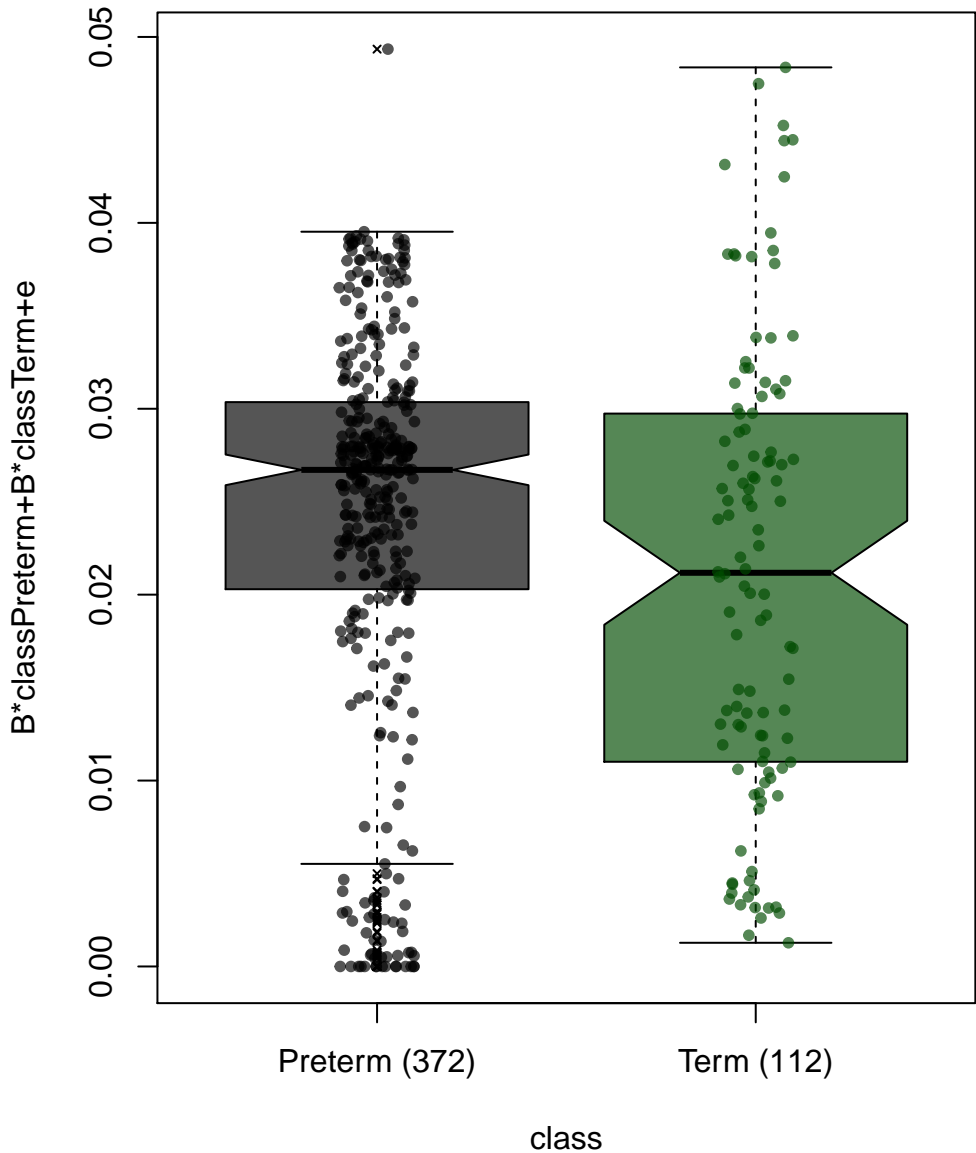

classTerm (0.000493 sd 0.000202, p=0.0153, q=0.0191)

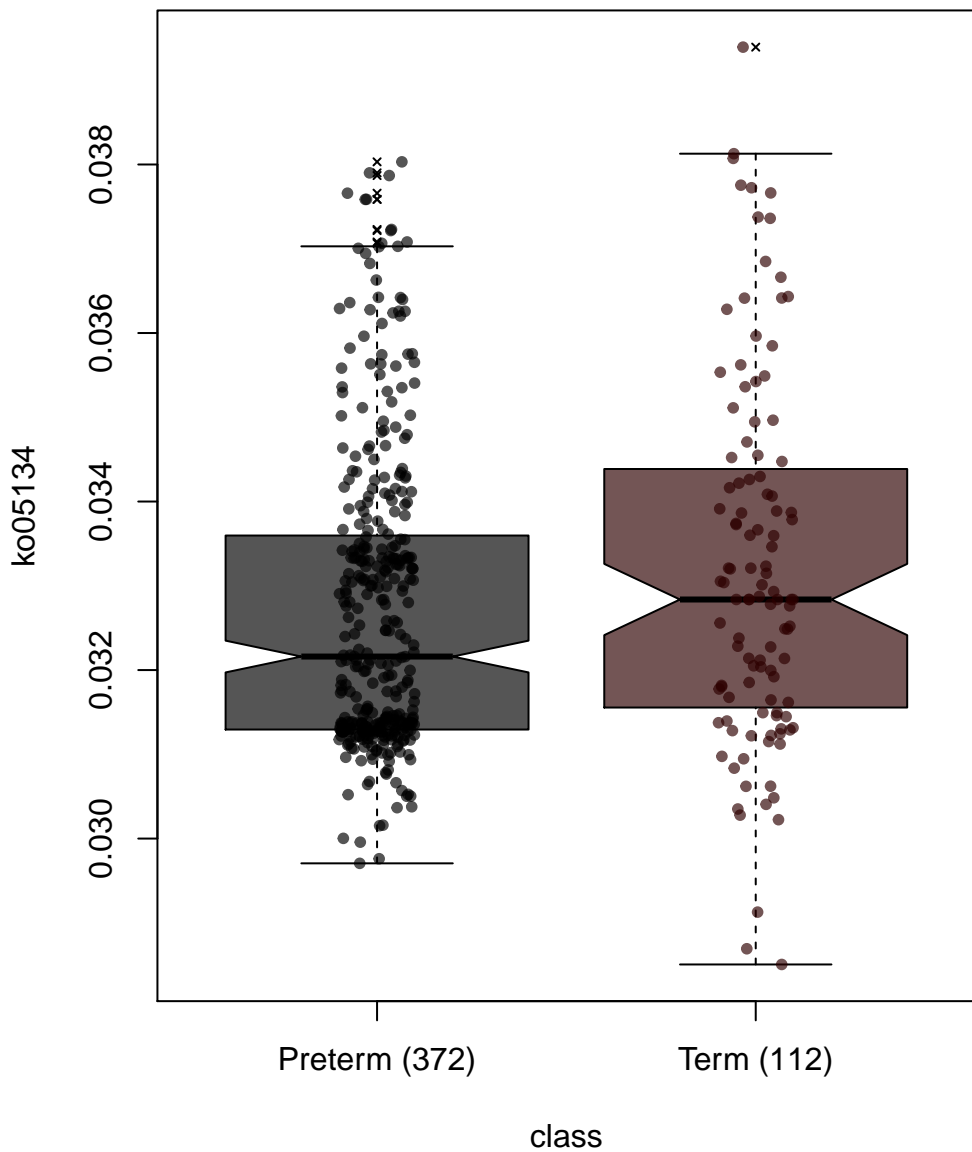

Partial Residual Plot

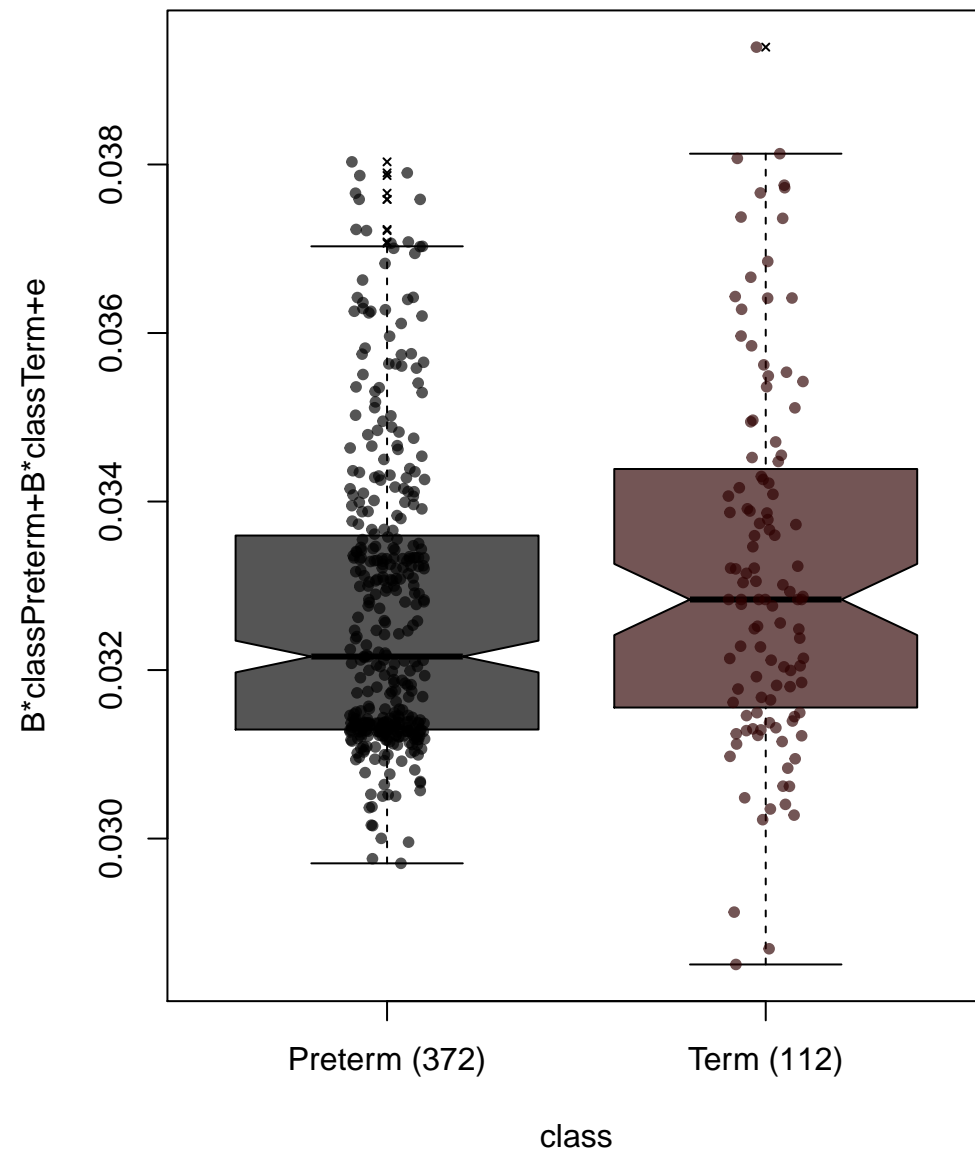

classTerm (0.00167 sd 0.000697, p=0.0167, q=0.0208)

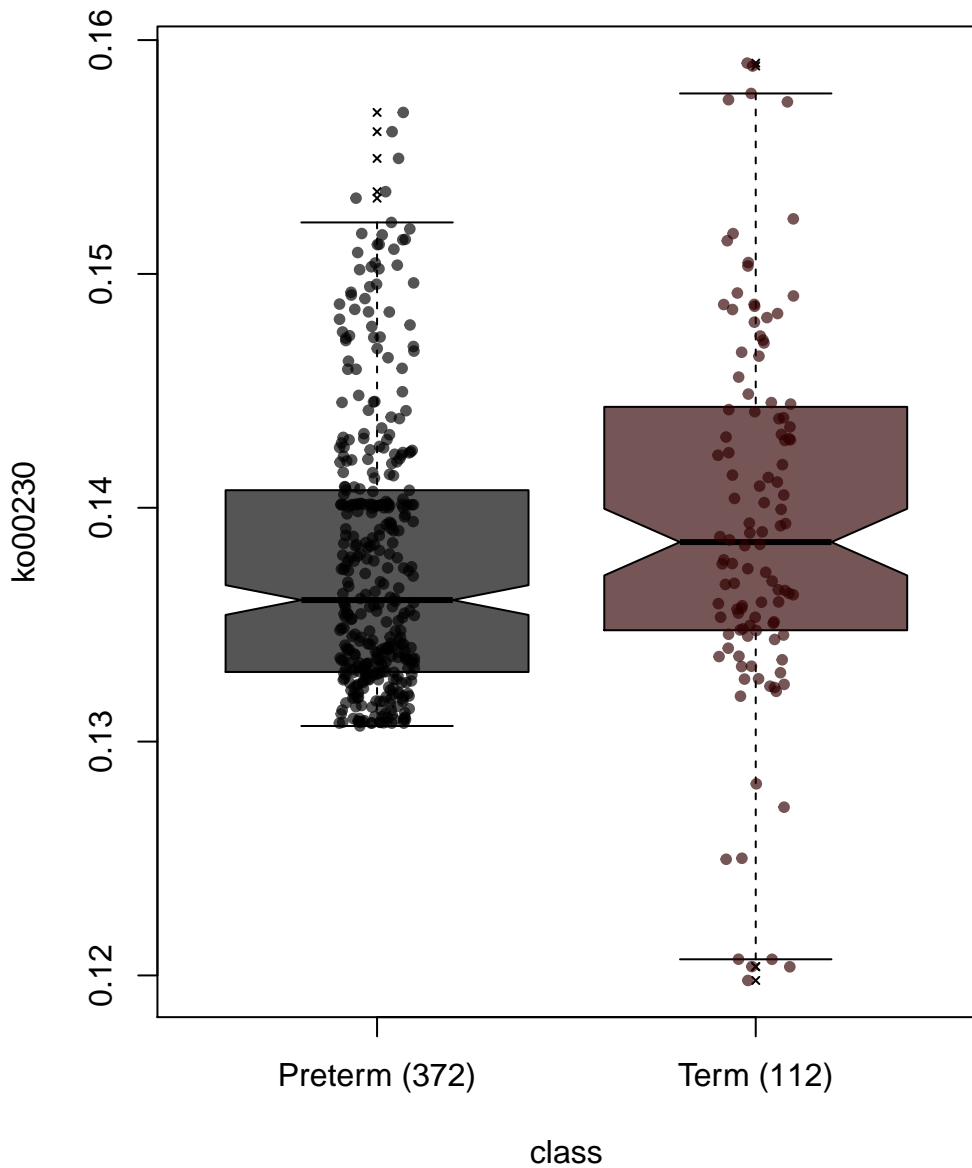

Partial Residual Plot

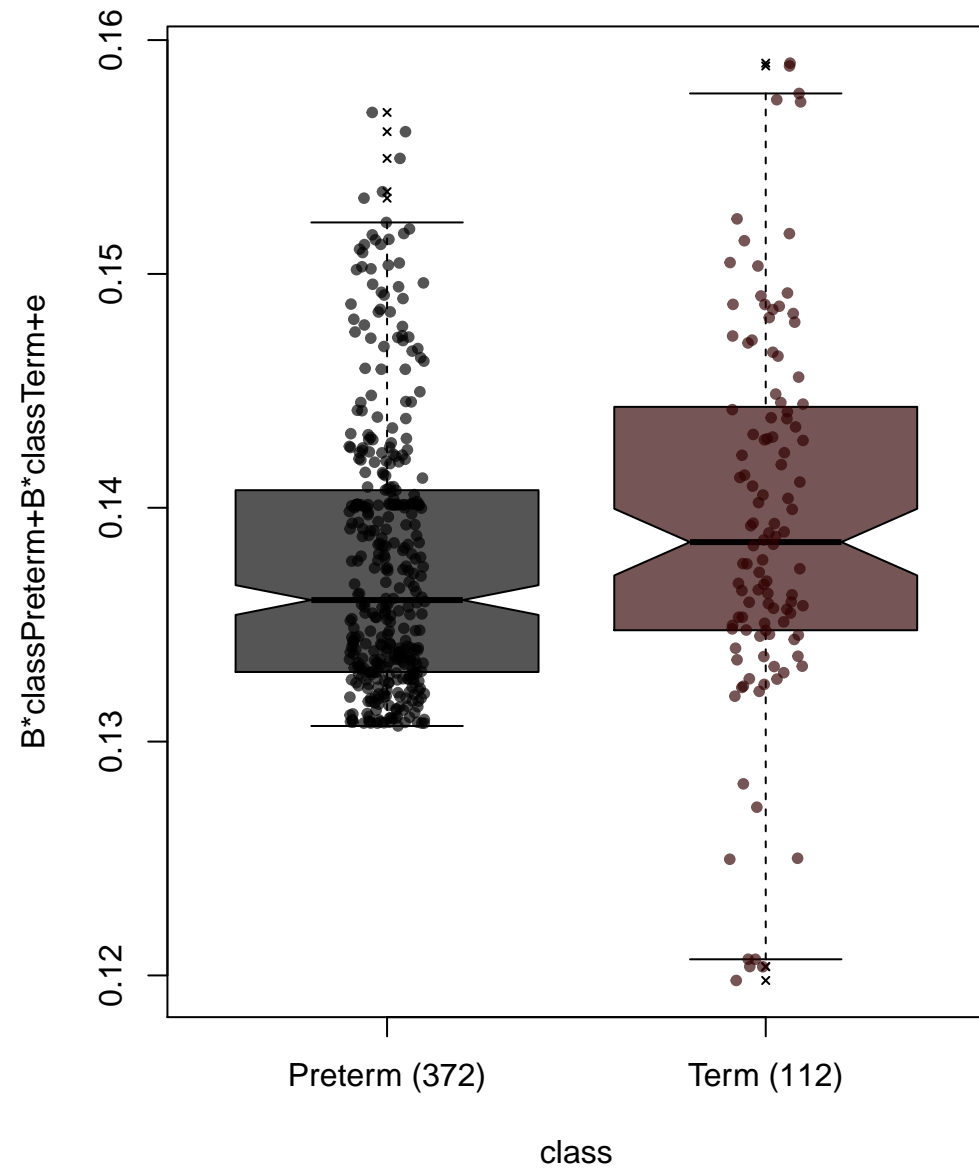

classTerm (−0.00187 sd 0.000806, p=0.0209, q=0.026)

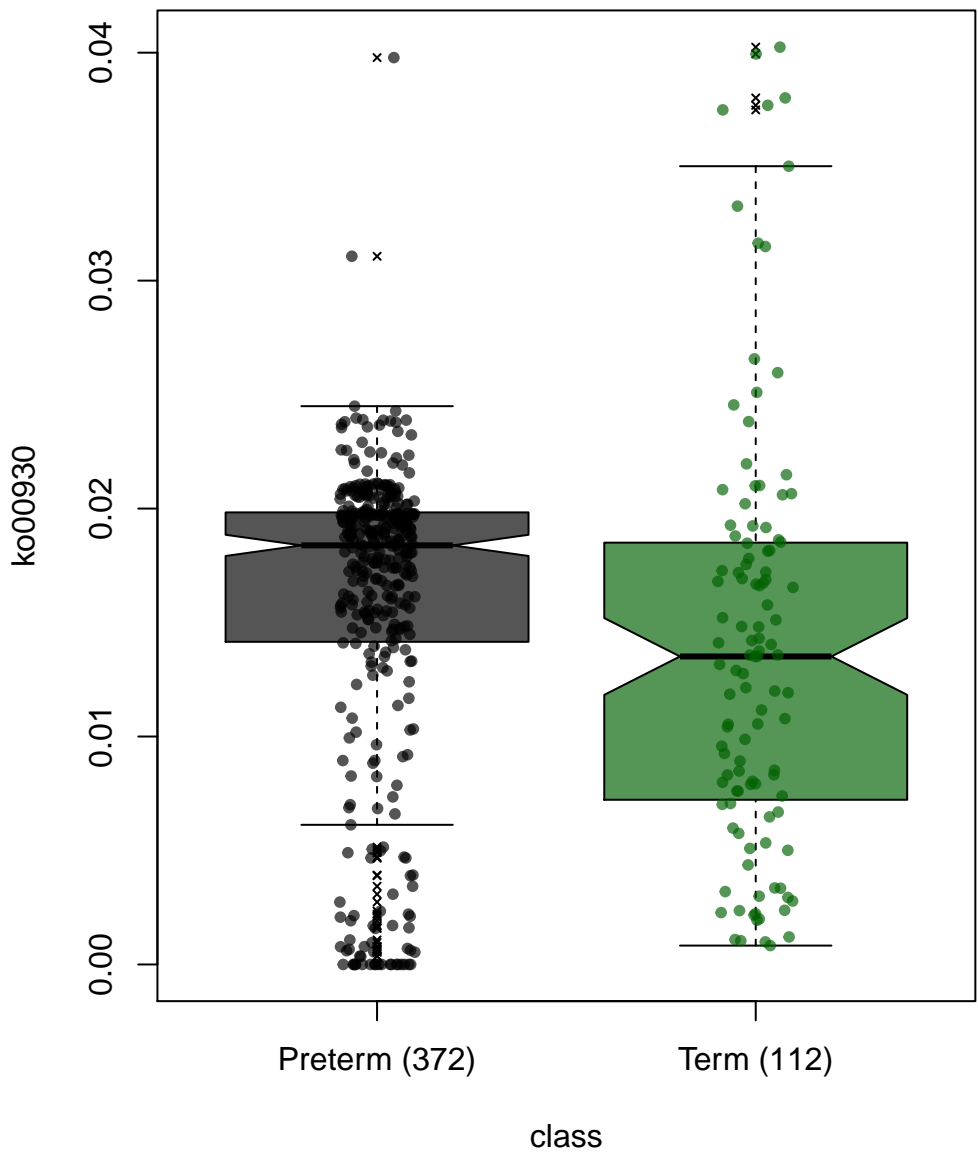

Partial Residual Plot

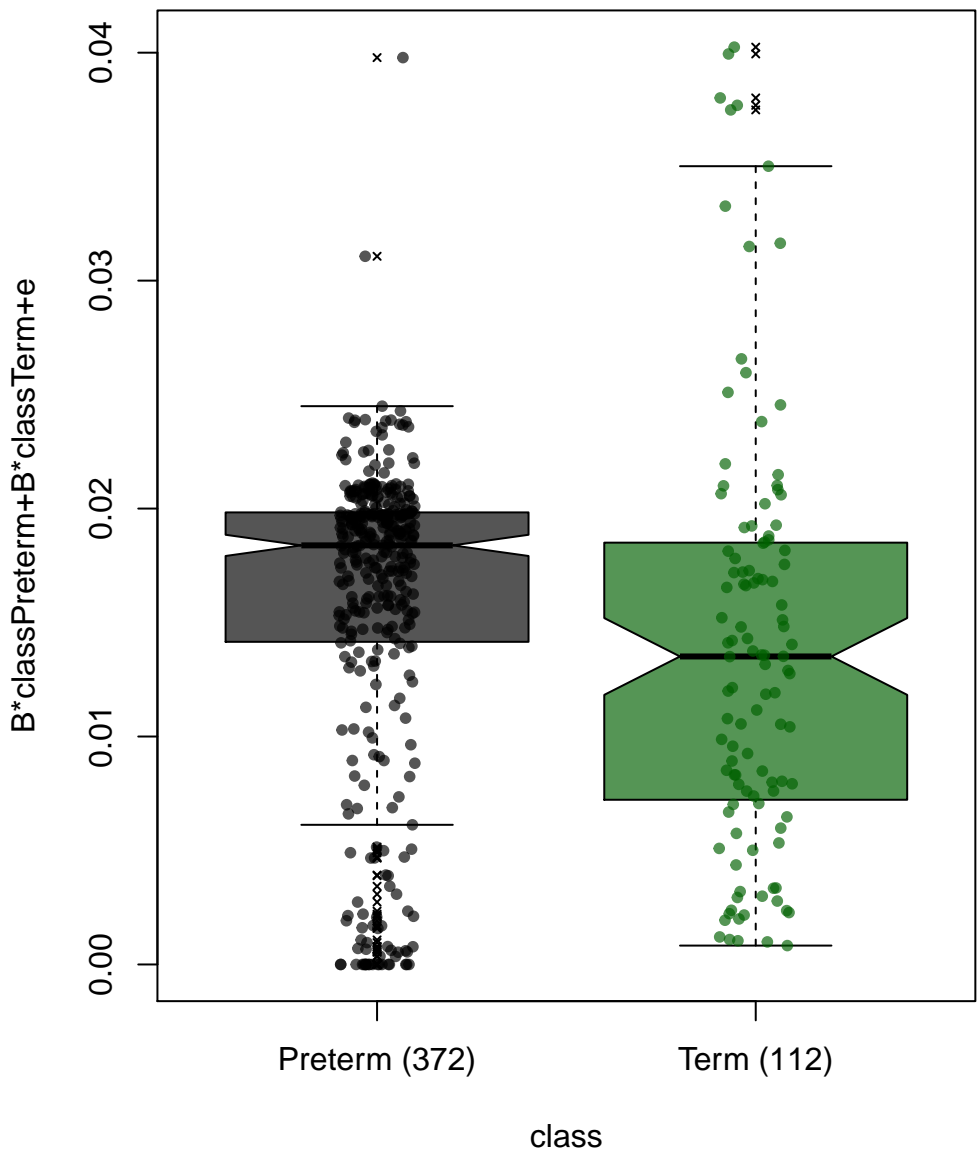

classTerm (-0.00168 sd 0.000762, p=0.0276, q=0.0341)

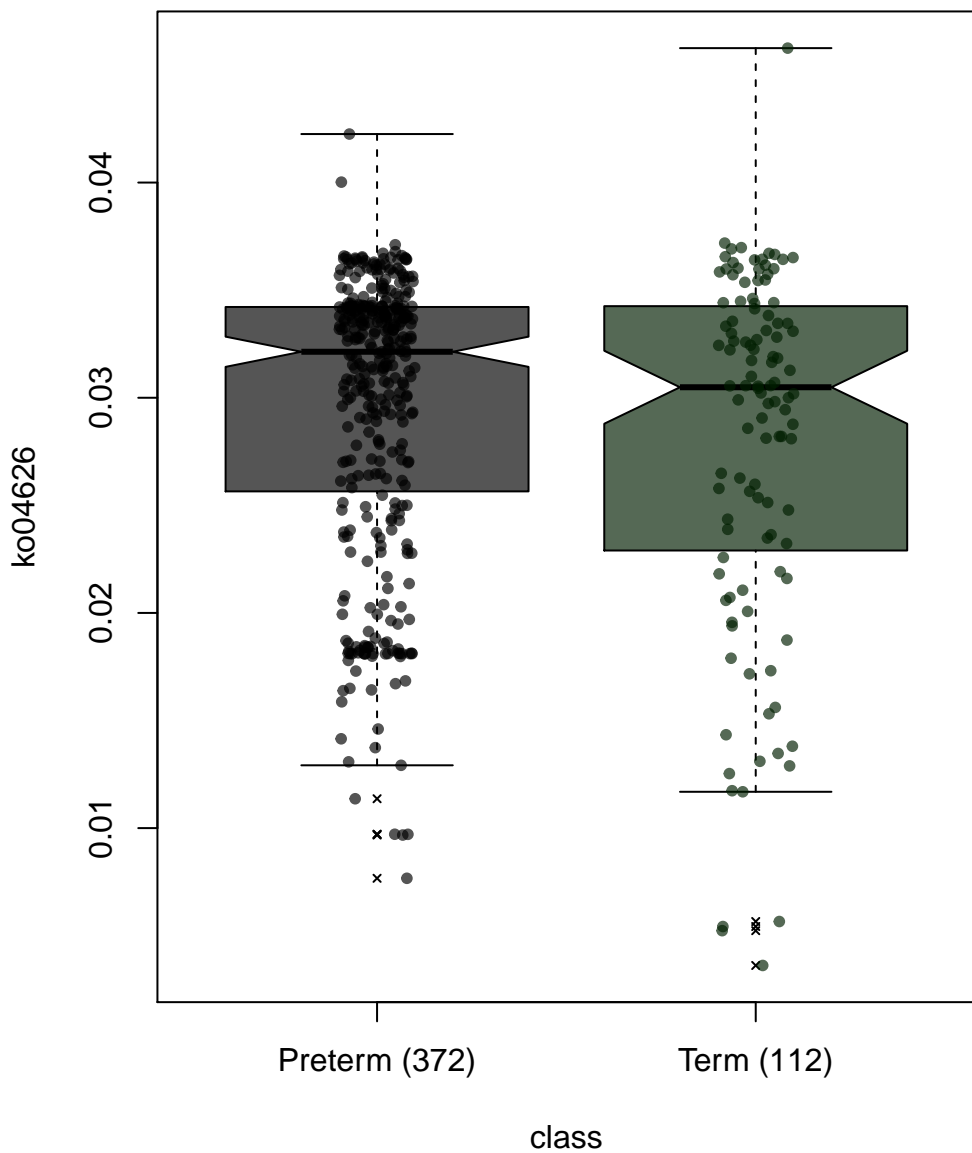

Partial Residual Plot

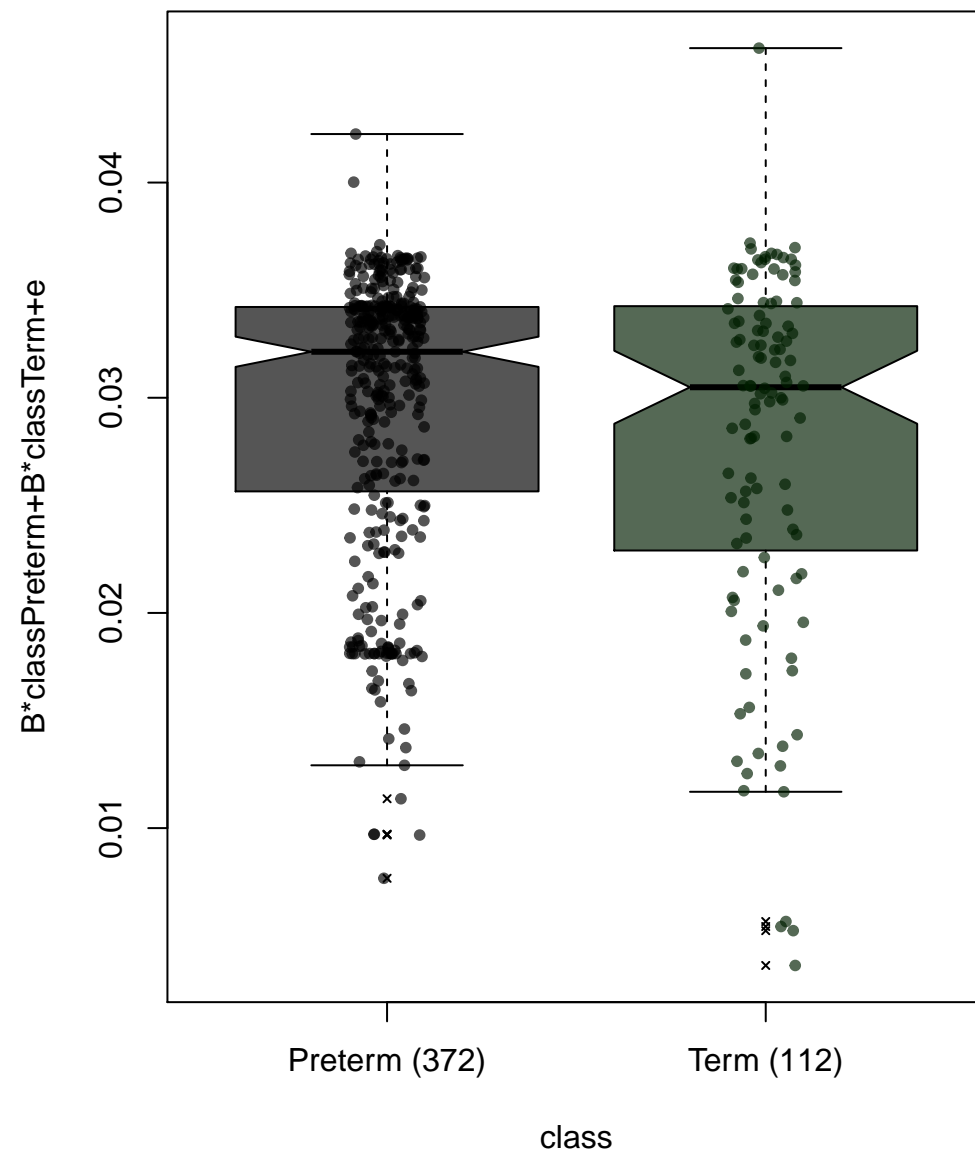

classTerm (0.00319 sd 0.00147, p=0.0308, q=0.0378)

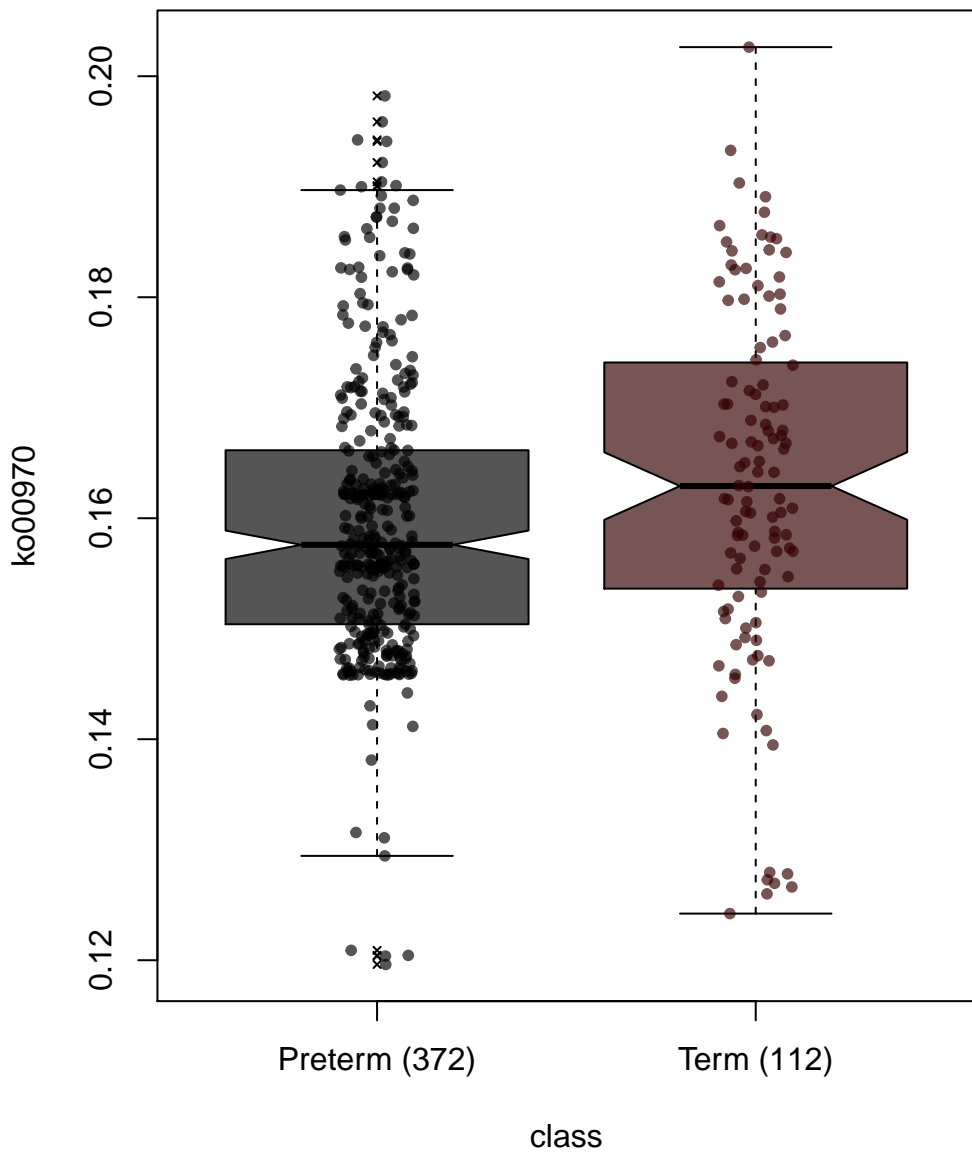

Partial Residual Plot

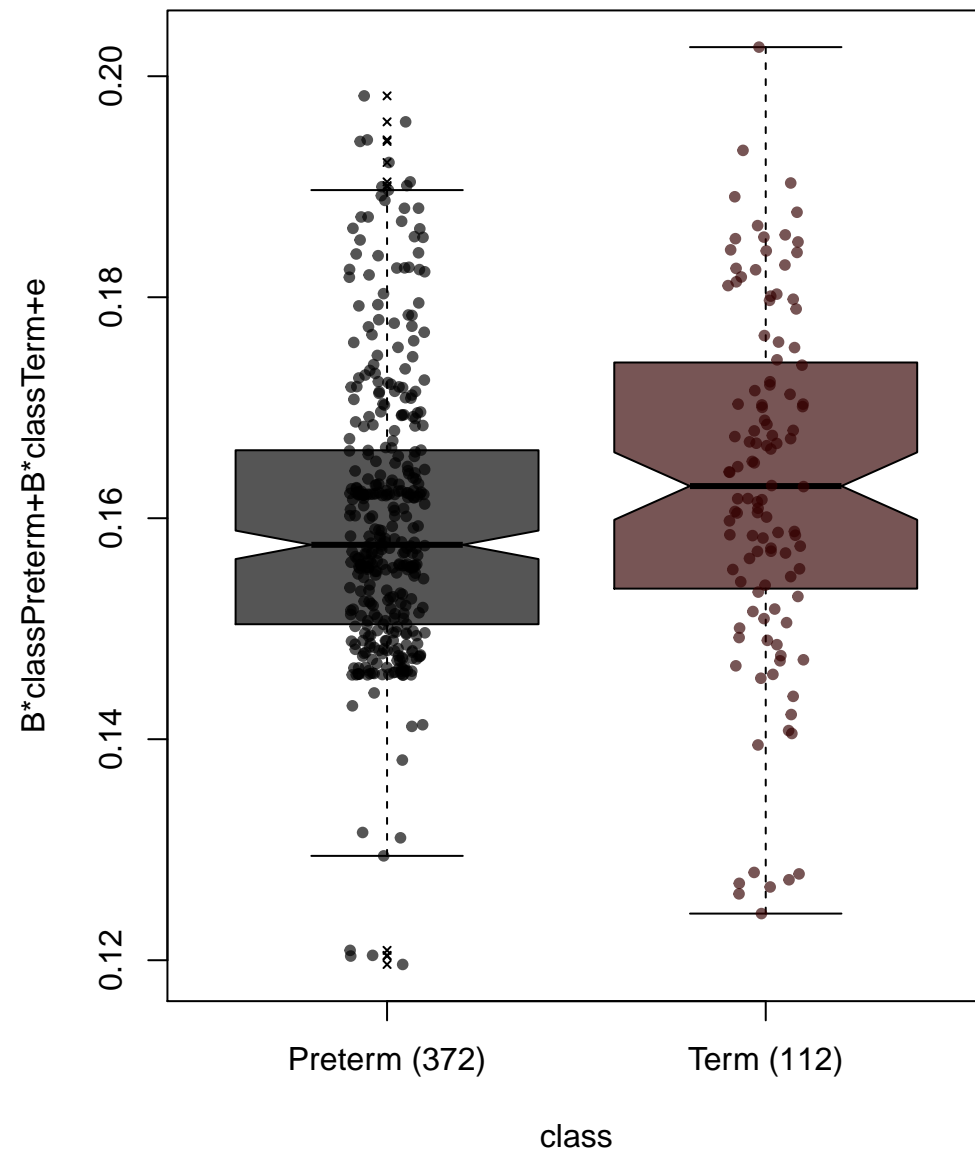



classTerm (−0.000996 sd 0.000473, p=0.0357, q=0.0437)

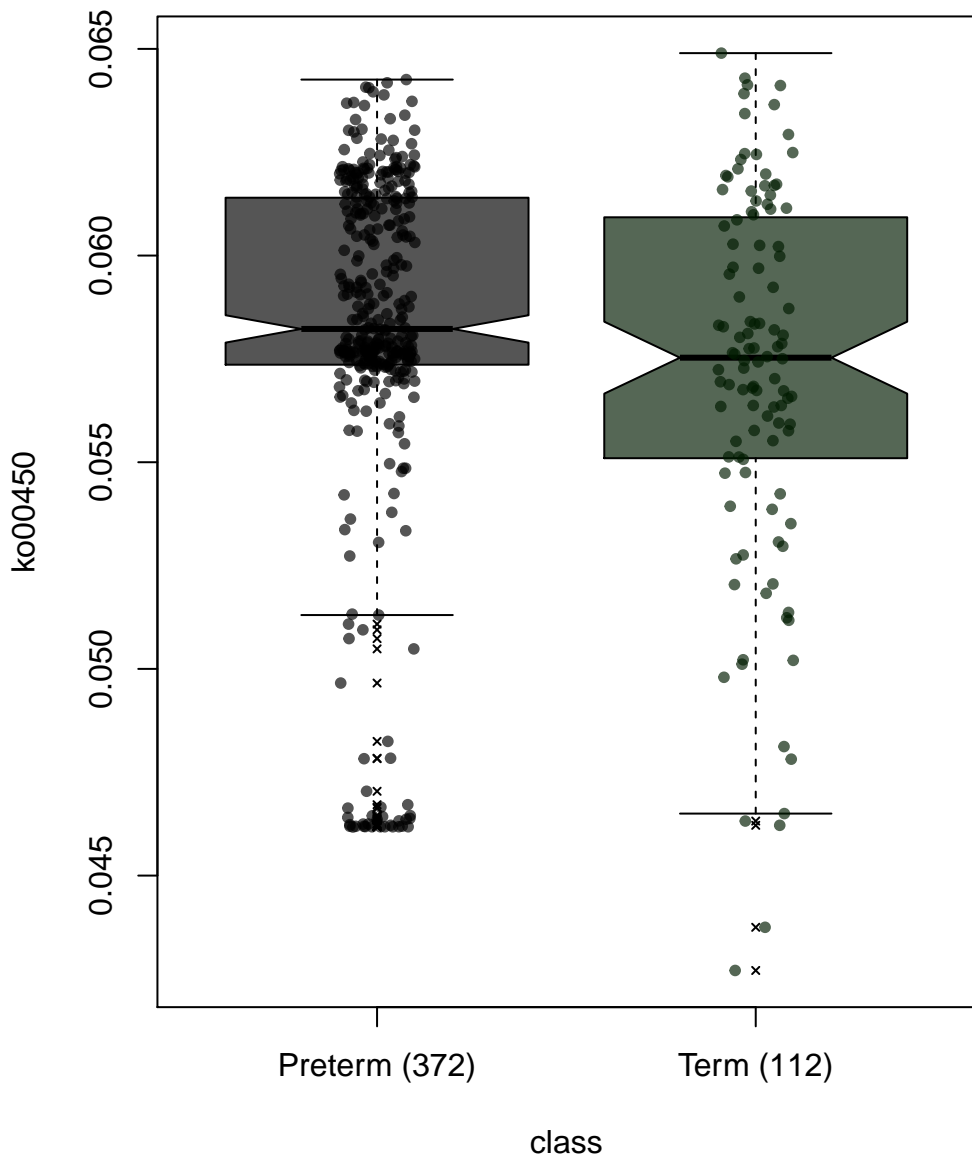

Partial Residual Plot

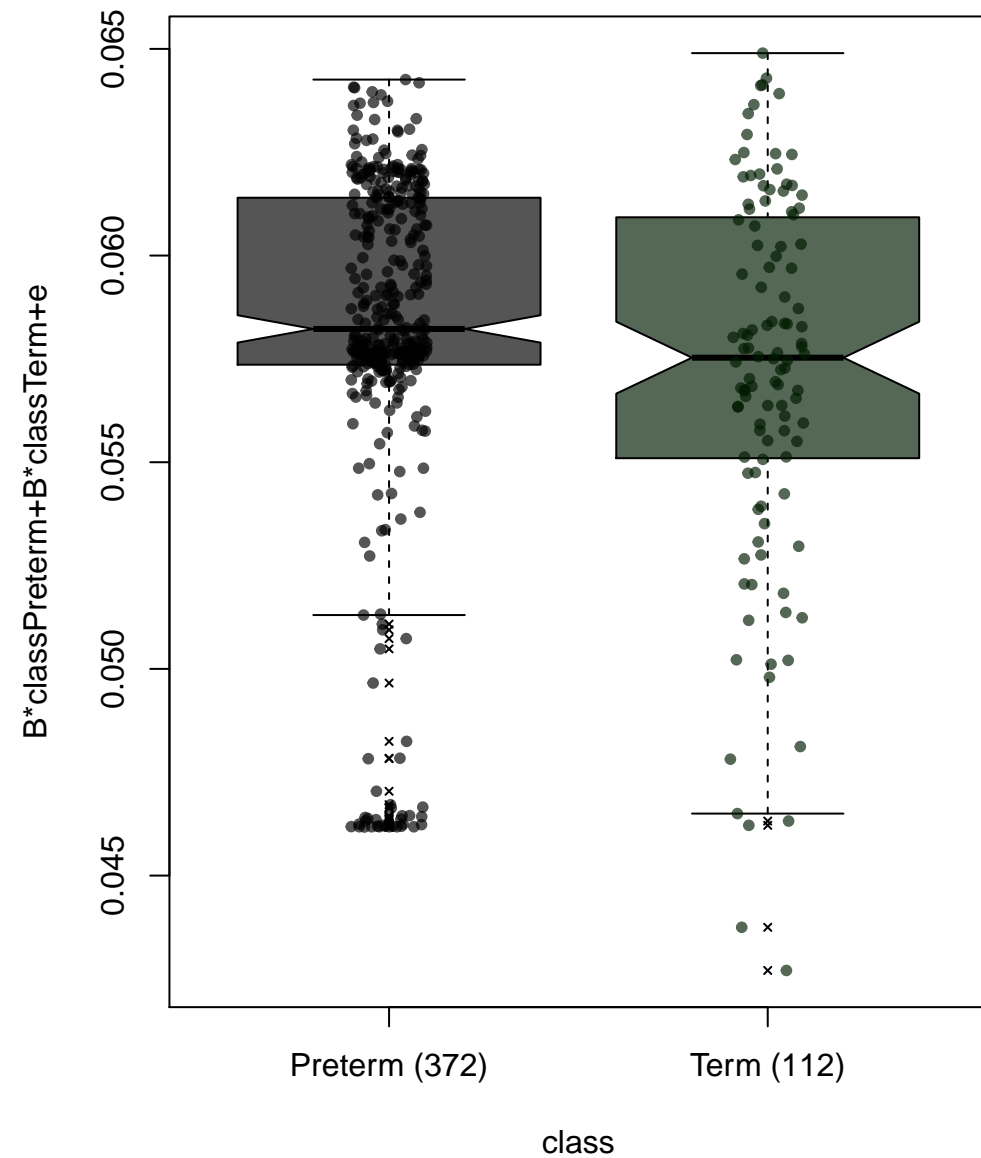

Supplement: s1 [file s1]
