# Supplementary material for: Predicted Metabolic Pathway Distributions in Stool Bacteria in Very-Low-Birth-Weight Infants: Potential Relationships with NICU Faltered Growth
Source: MDPI journal article supplement (doi:10.3390/nu12051345), 2020-05-08

## Supplementary data

Metabolic Pathway Distributions in Very Low Birth Weight Infants:  
Potential Relationships with NICU Faltered Growth

**S1. Association of the relative abundance of bacterial class between VLBW infants and term infants.** Each page of this file shows a separate bacterial class which was significantly different between the two groups. The box plots indicate the association of the metadata (here, the two groups preterm and term infants) with the relative abundances. The strength of association is indicated by the p-value and an FDR-corrected q-value. The partial residual plot shows the relationship between the groups with abundances when all other variables are included in the model.

typeTerm (0.0107 sd 0.000705, p=1.14e-42, q=4.54e-41)

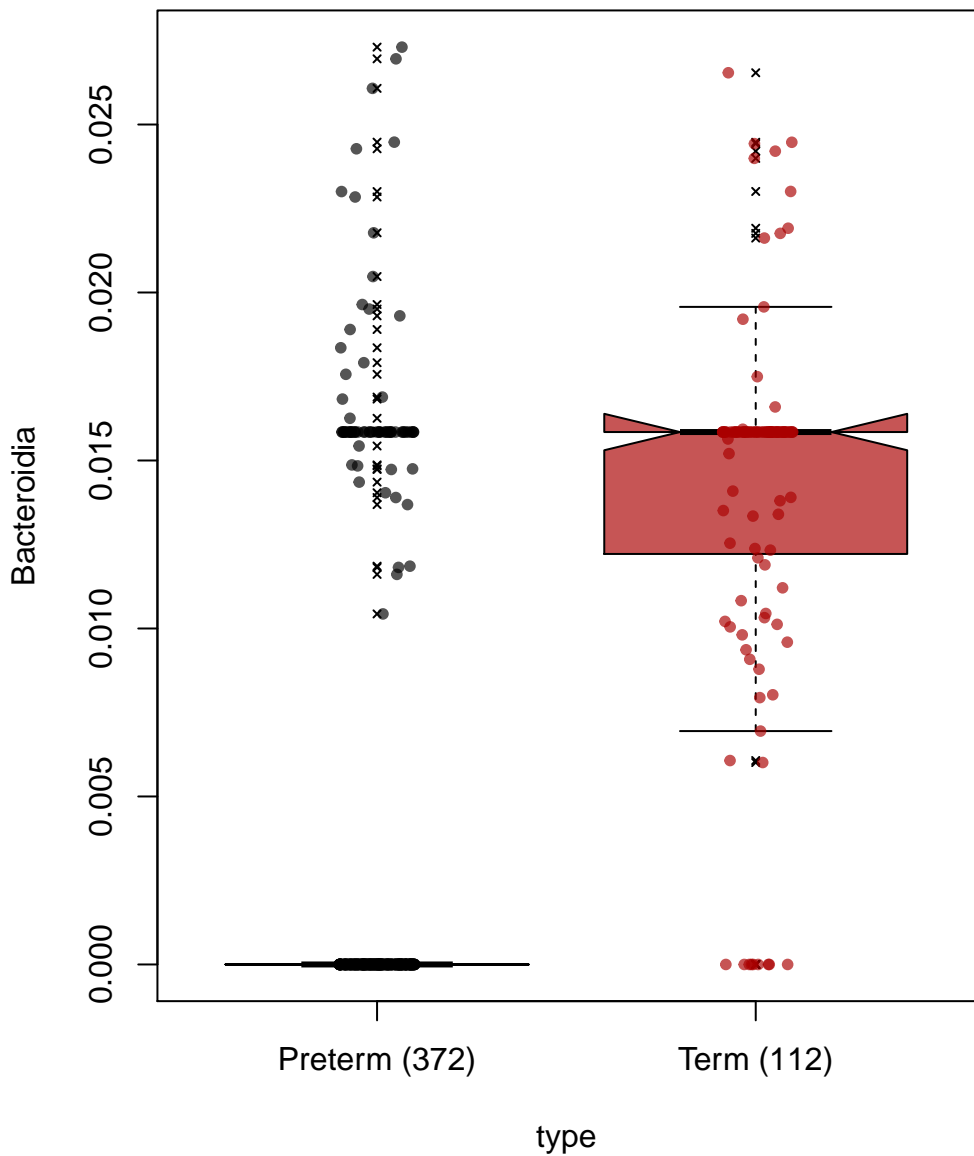

Partial Residual Plot

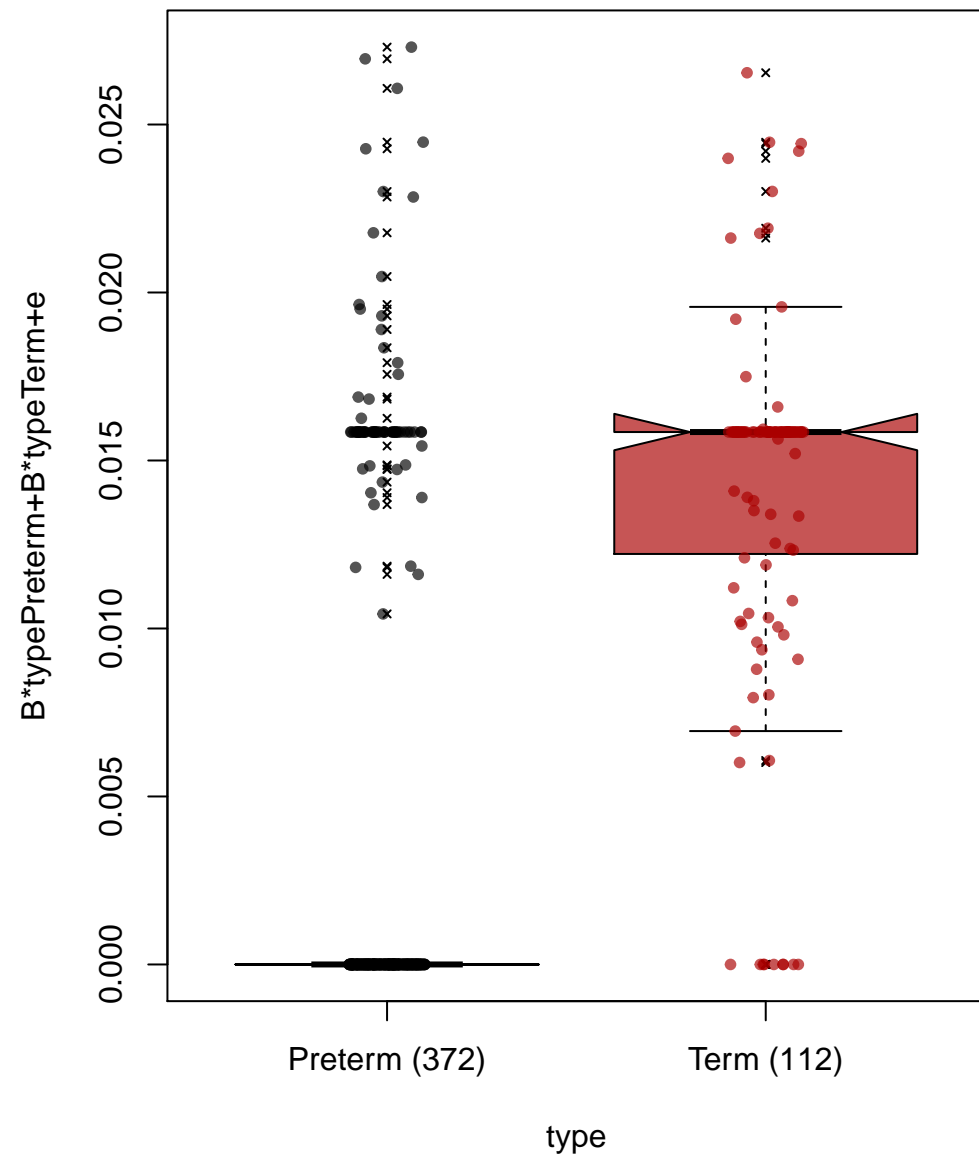

typeTerm (0.0627 sd 0.00757, p=1.14e-15, q=2.28e-14)

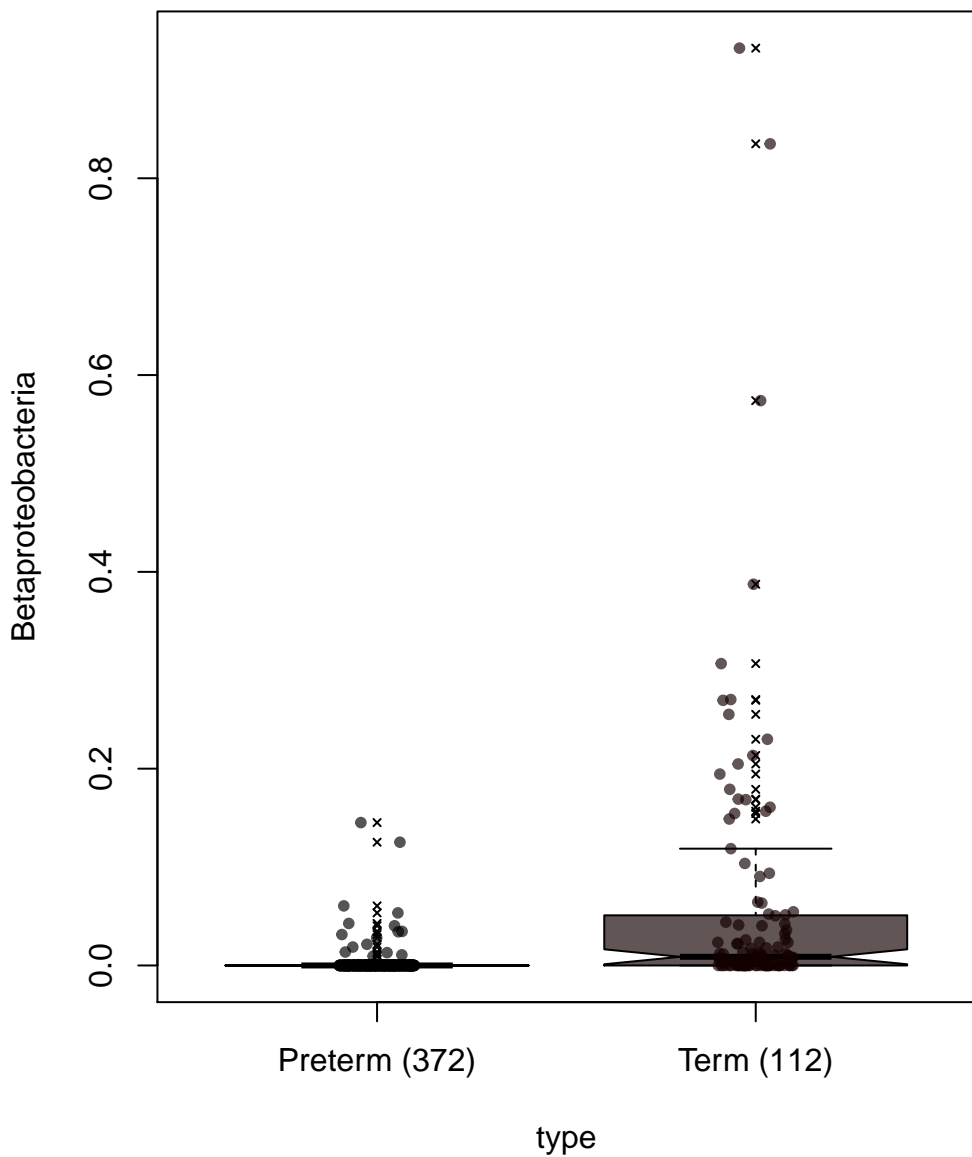

Partial Residual Plot

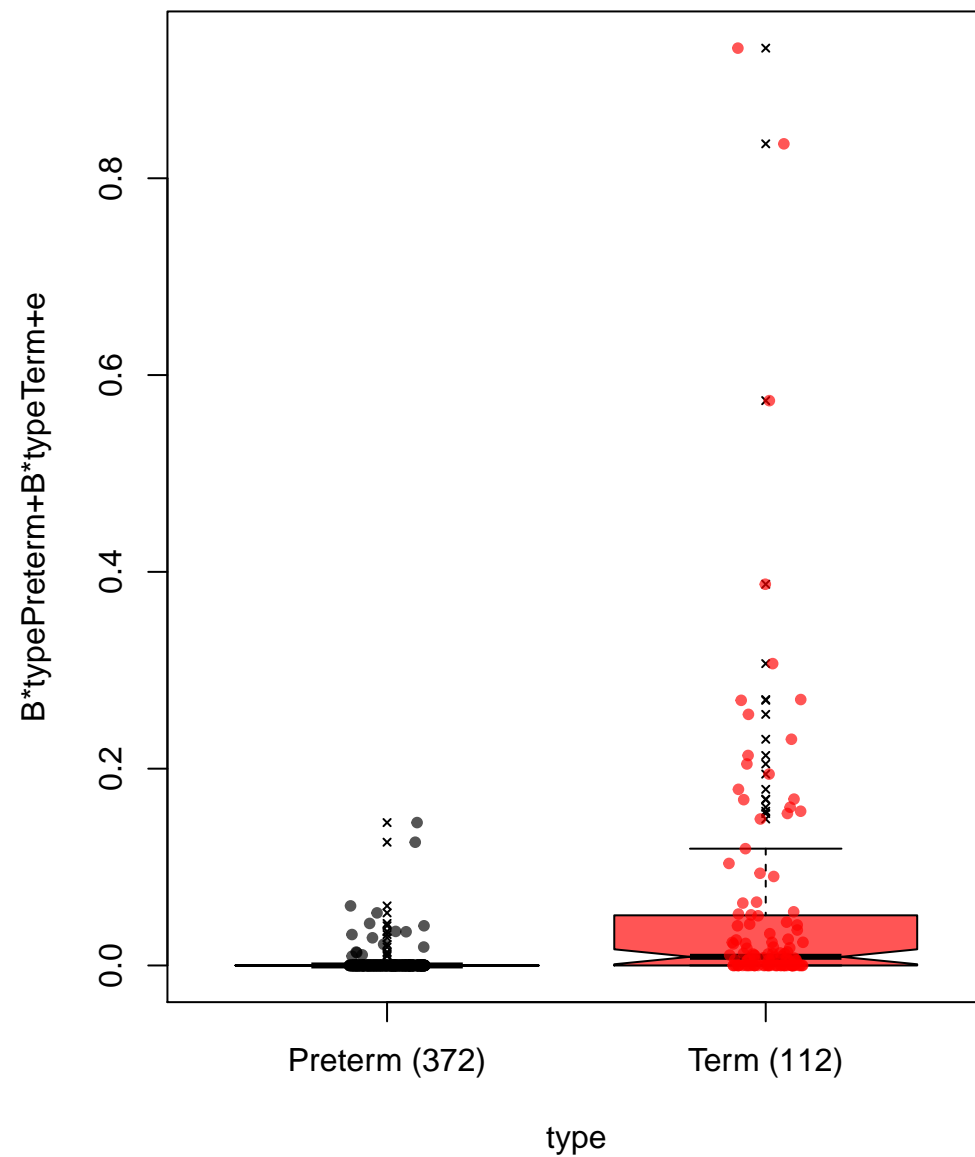

typeTerm (-0.322 sd 0.0463, p=1.22e-11, q=1.63e-10)

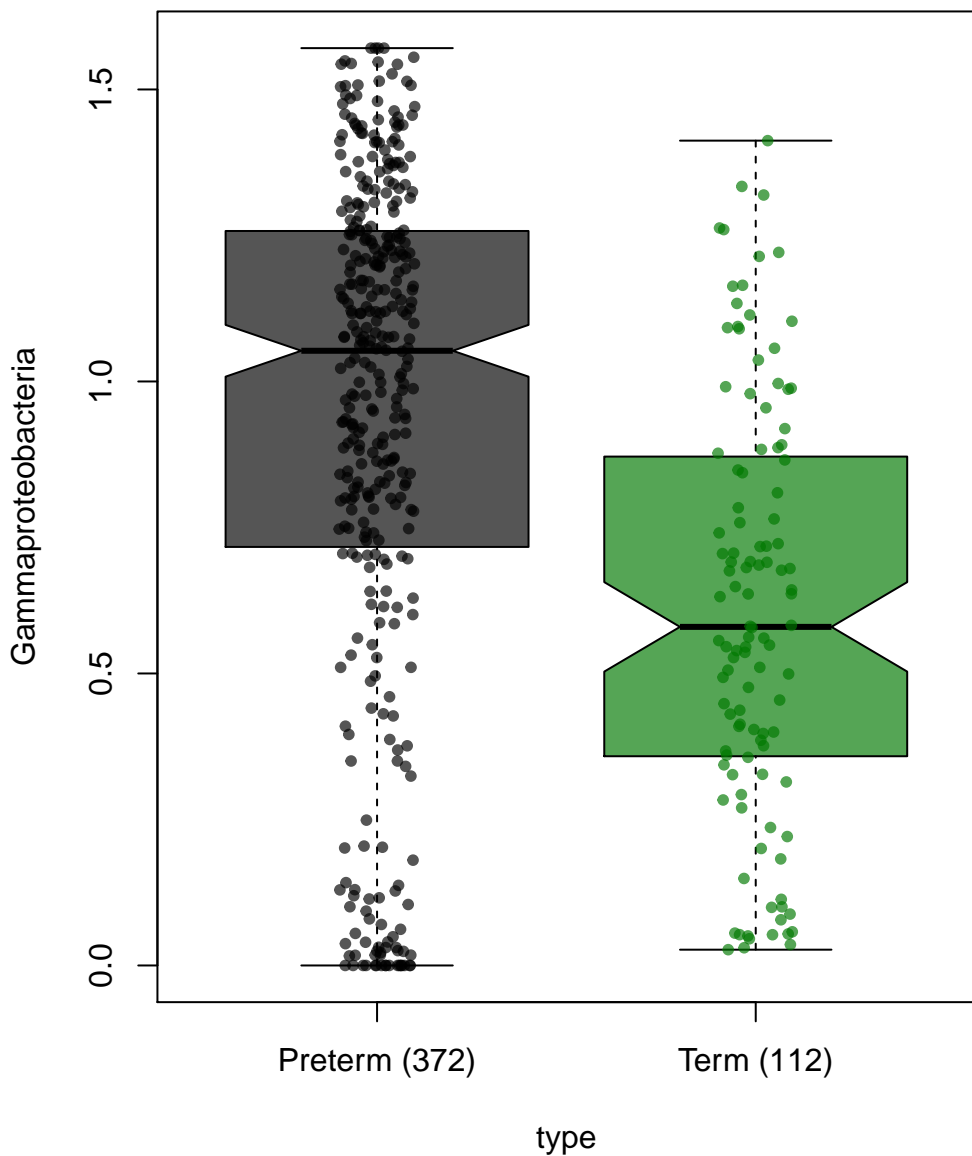

Partial Residual Plot

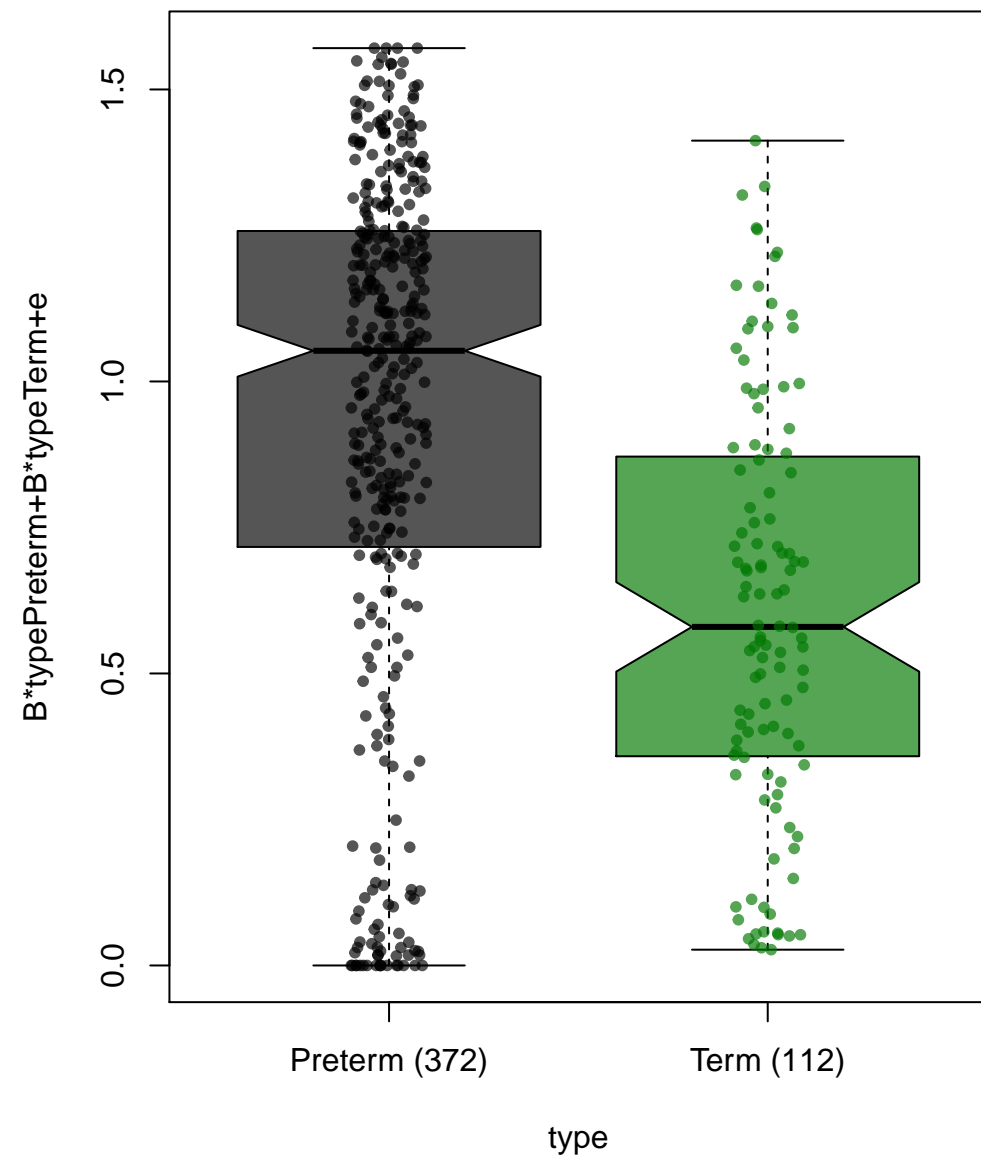

typeTerm (0.0472 sd 0.00746, p=5.88e-10, q=5.88e-09)

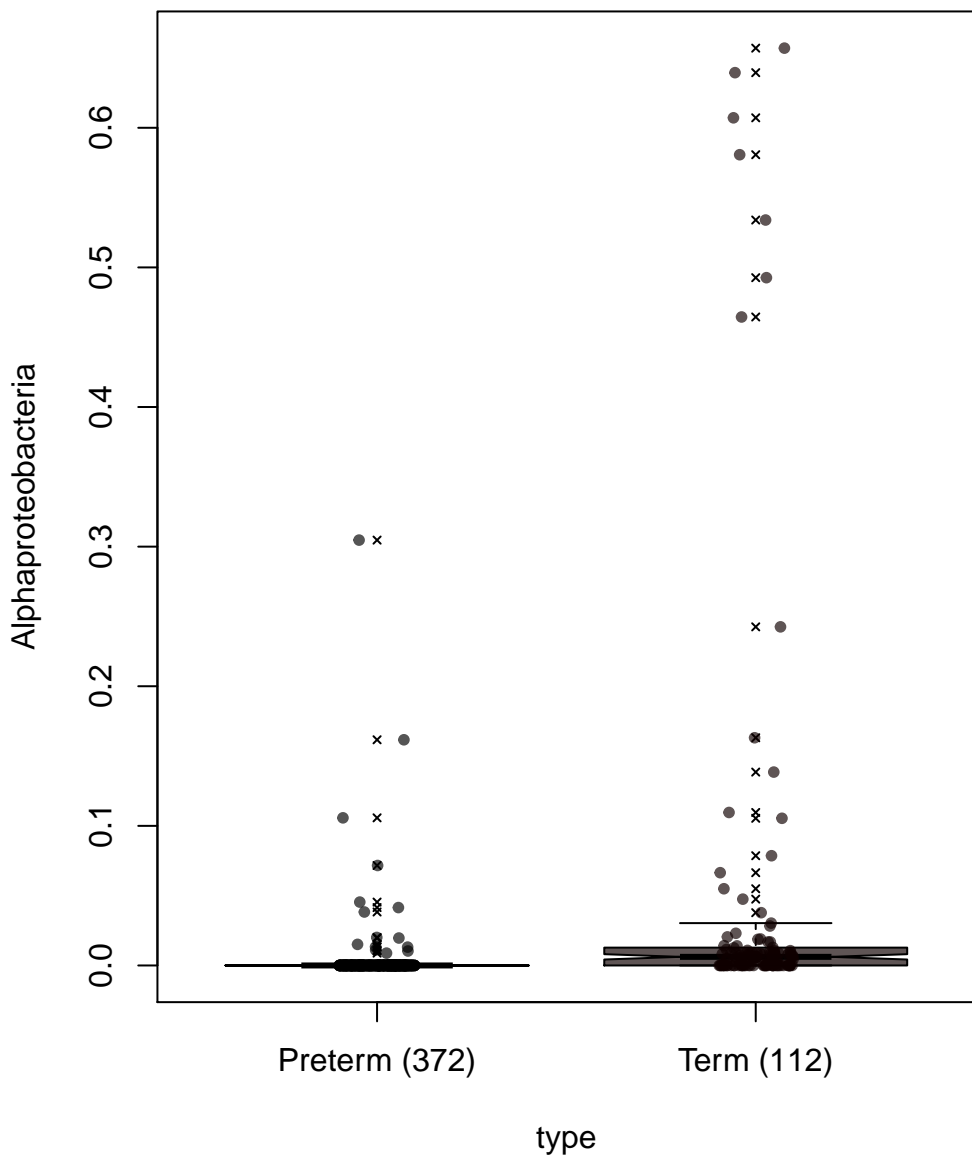

Partial Residual Plot

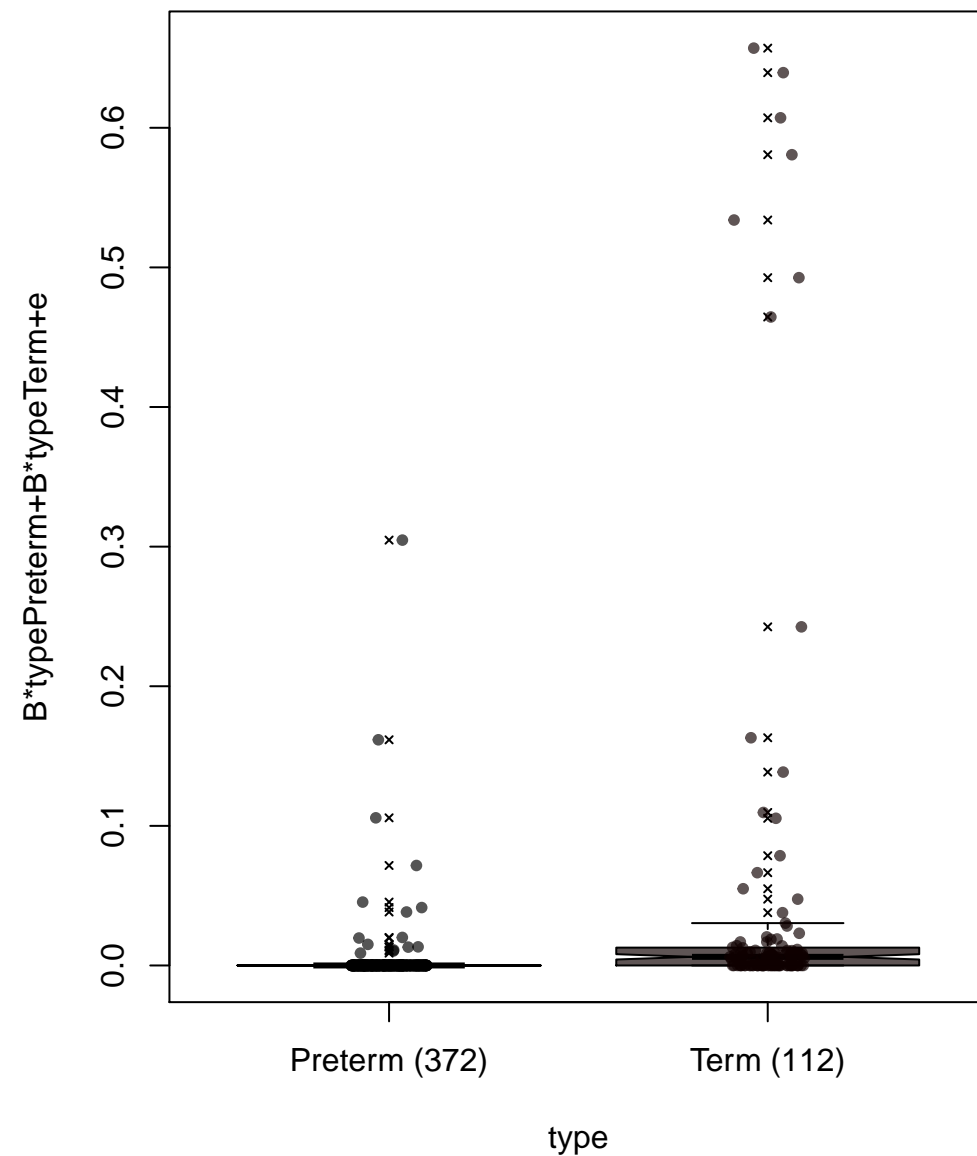

typeTerm (0.0232 sd 0.00442, p=2.26e-07, q=1.81e-06)

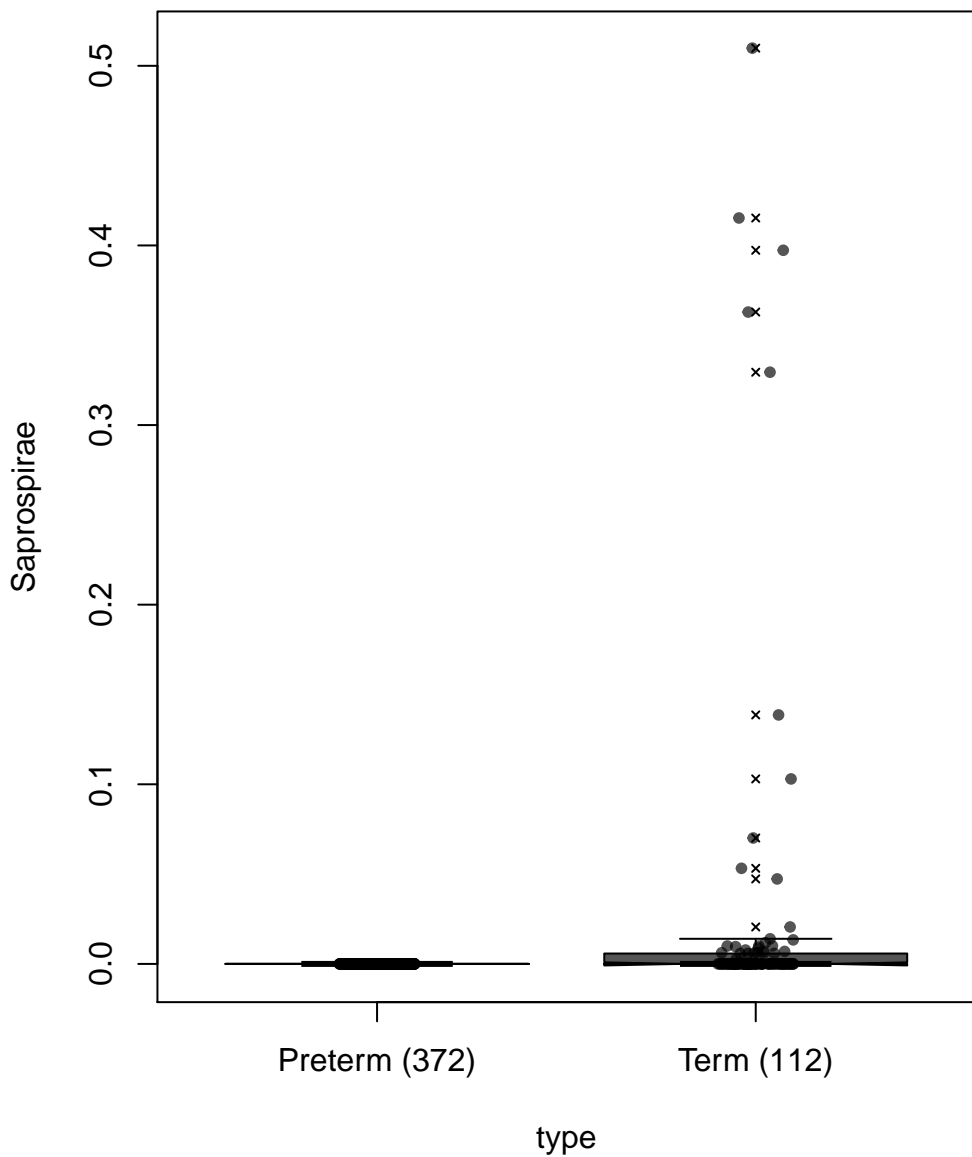

Partial Residual Plot

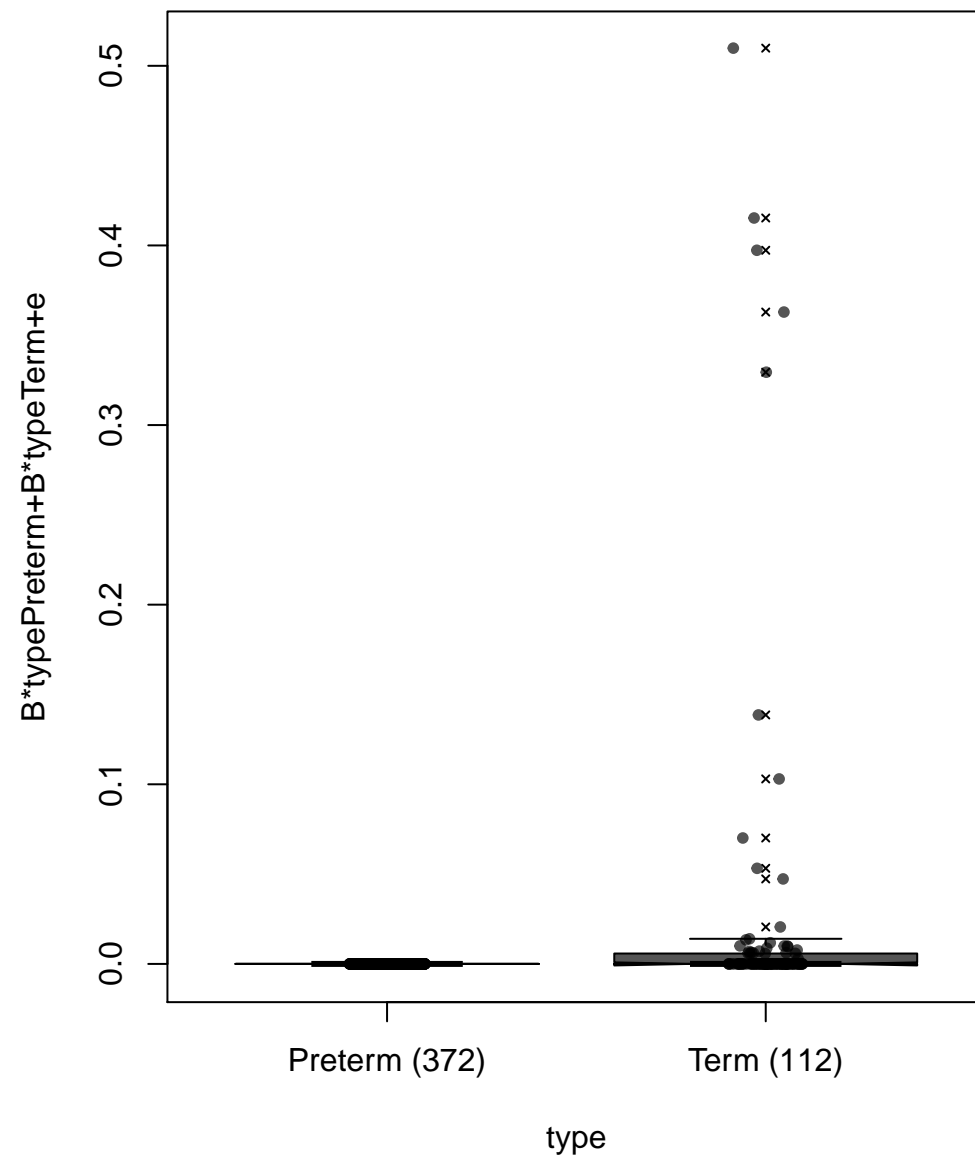

typeTerm (0.106 sd 0.0265, p=7.25e-05, q=0.000483)

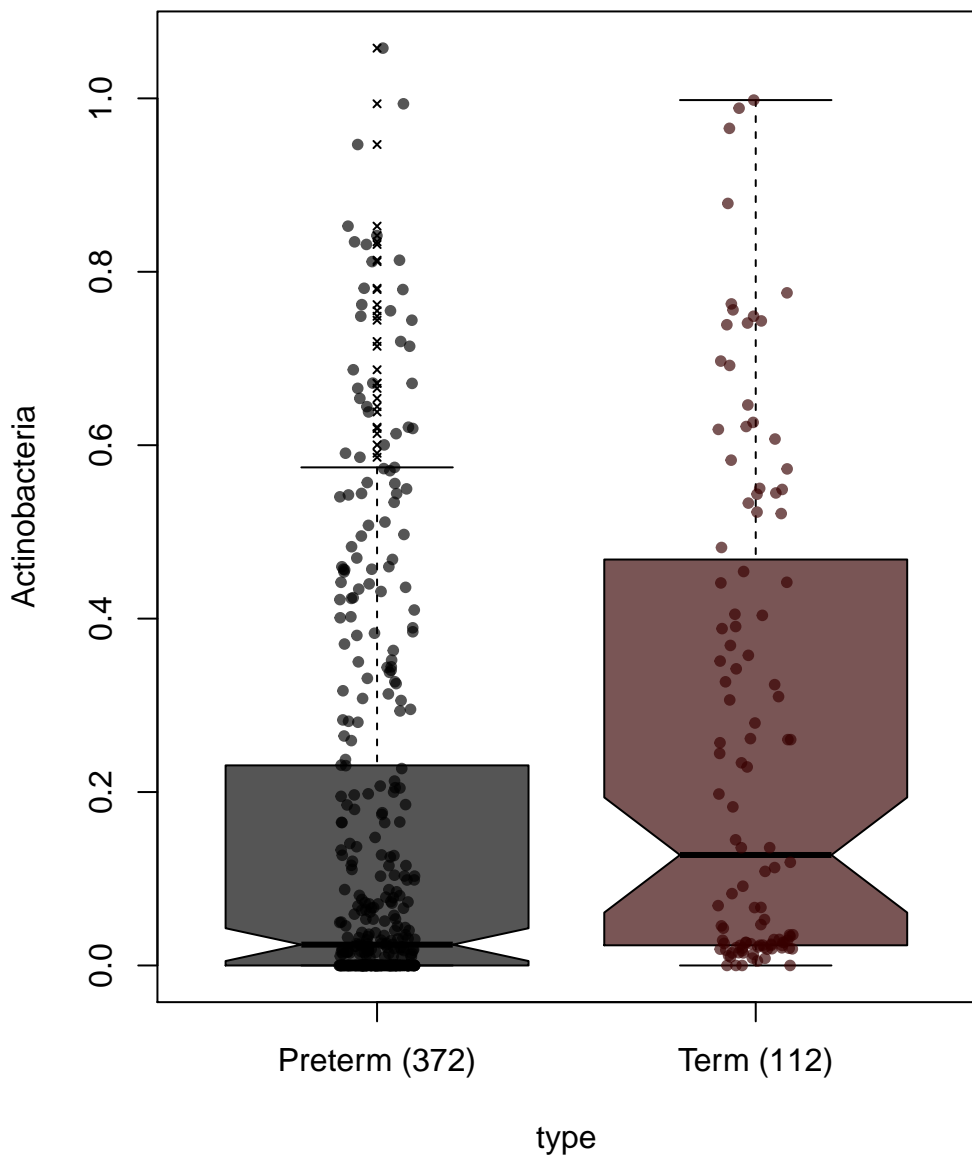

Partial Residual Plot

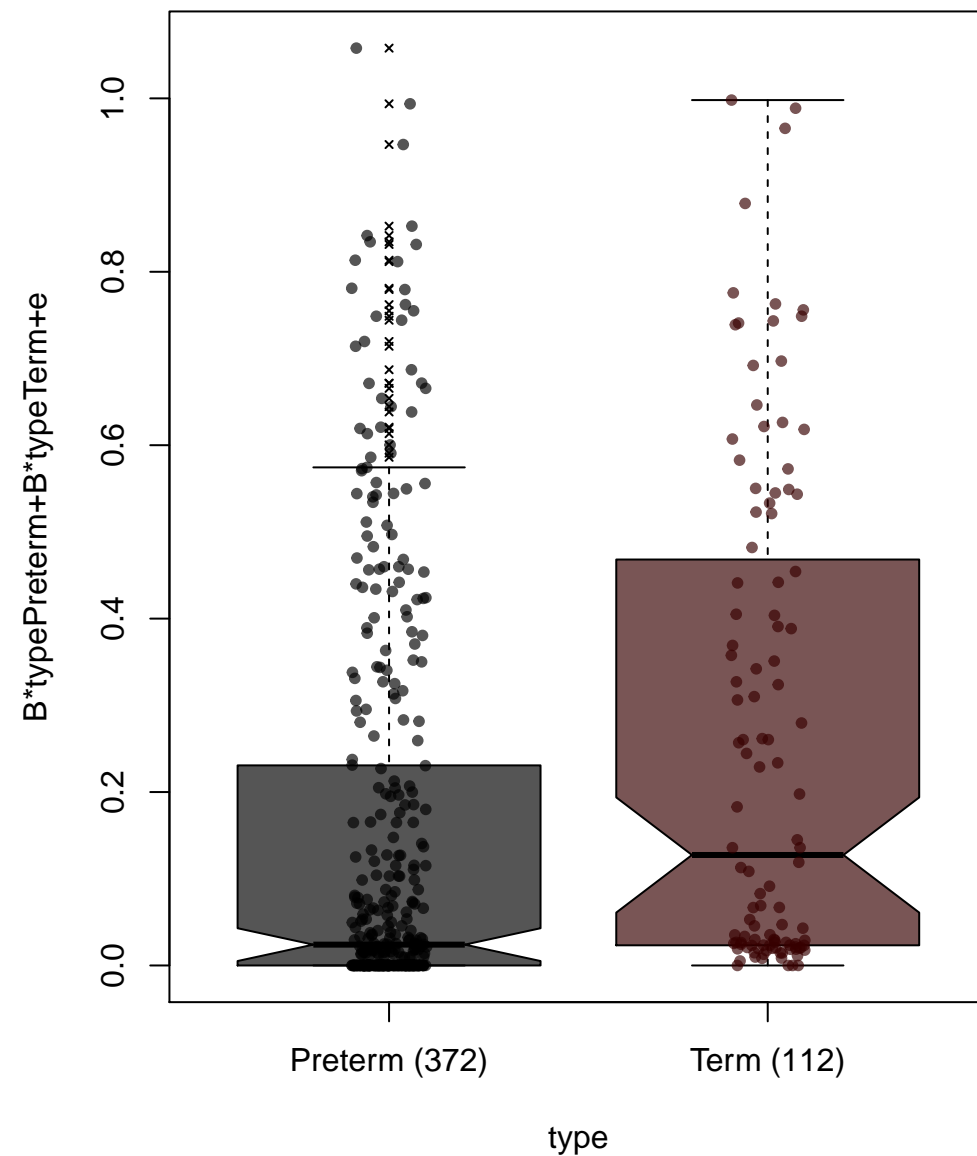

typeTerm (0.0251 sd 0.00669, p=0.000195, q=0.00112)

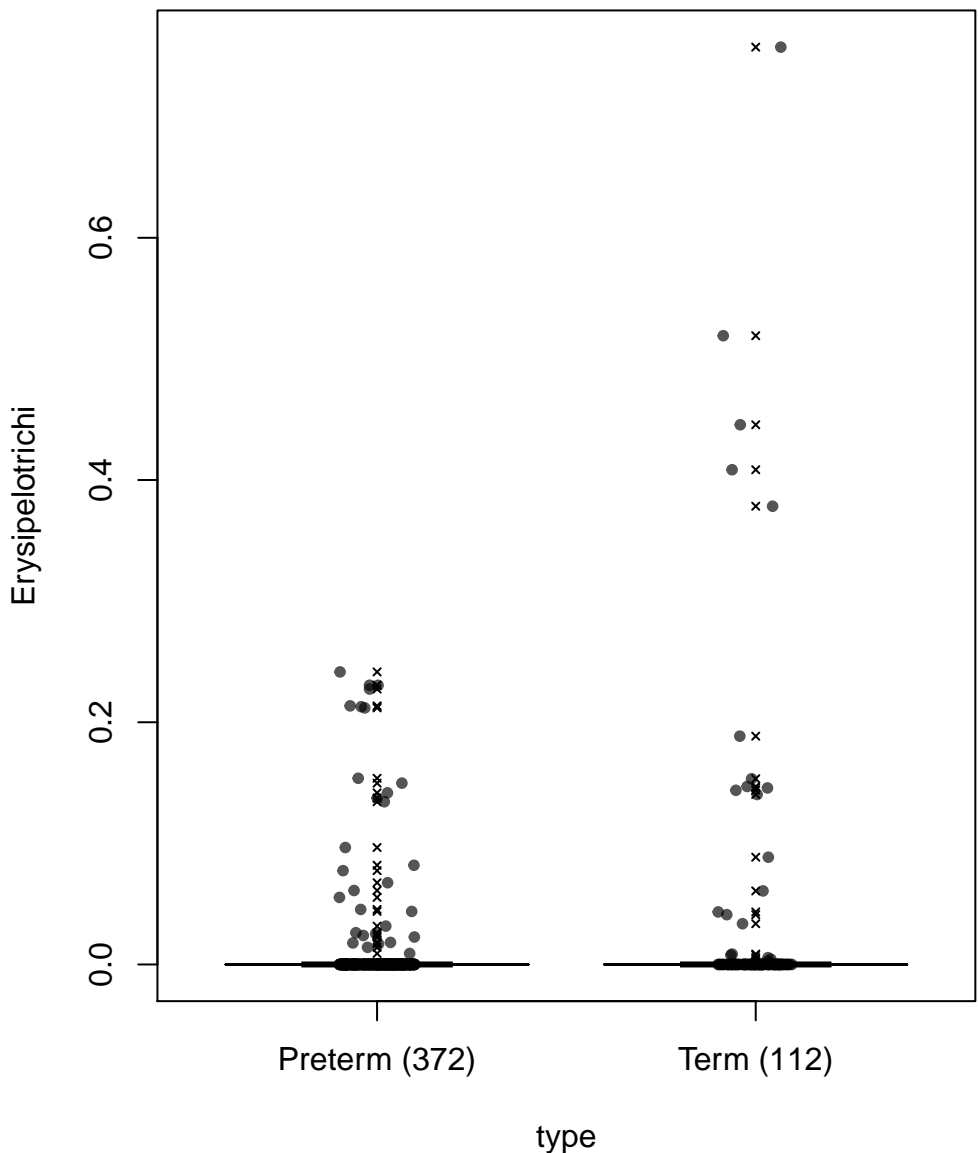

Partial Residual Plot

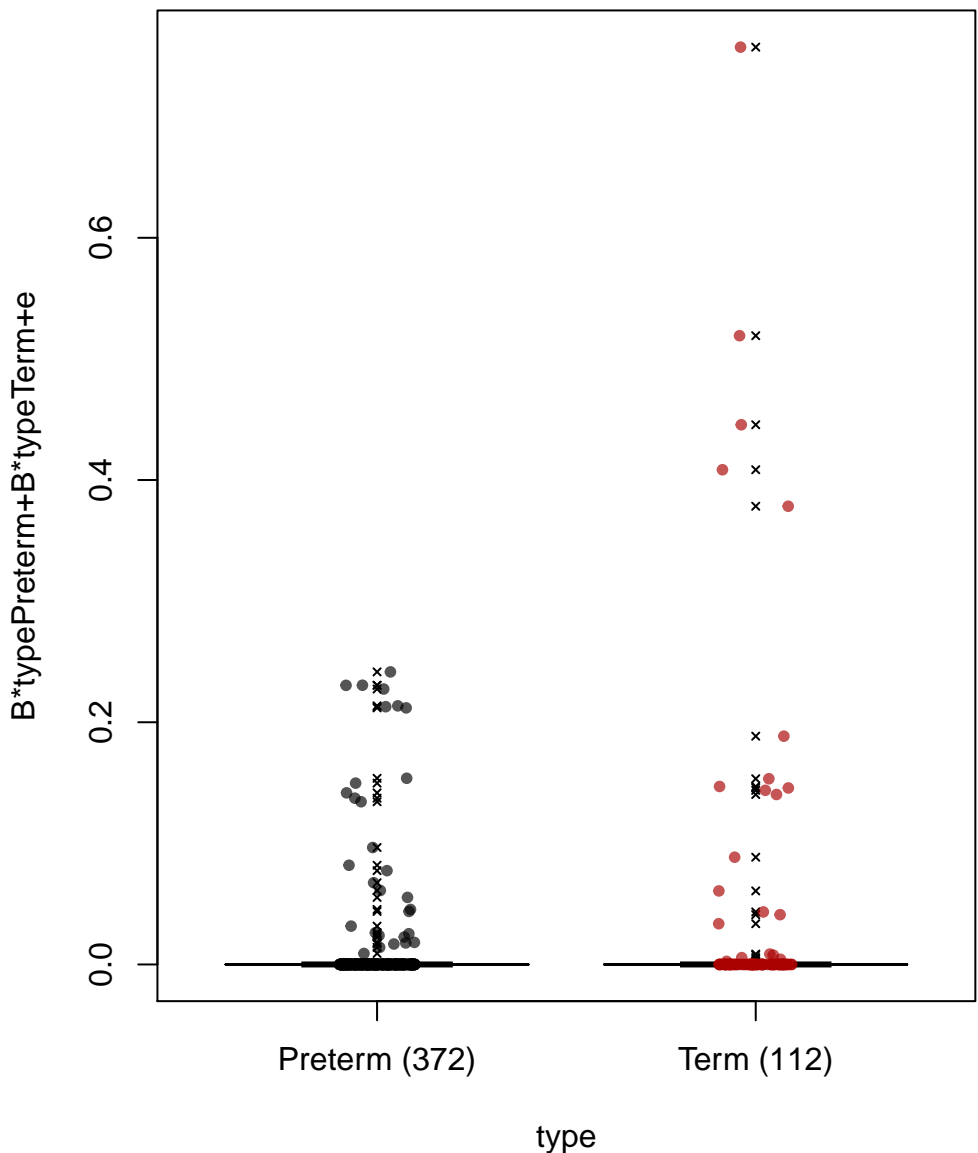



typeTerm (0.0037 sd 0.00102, p=0.000333, q=0.00167)

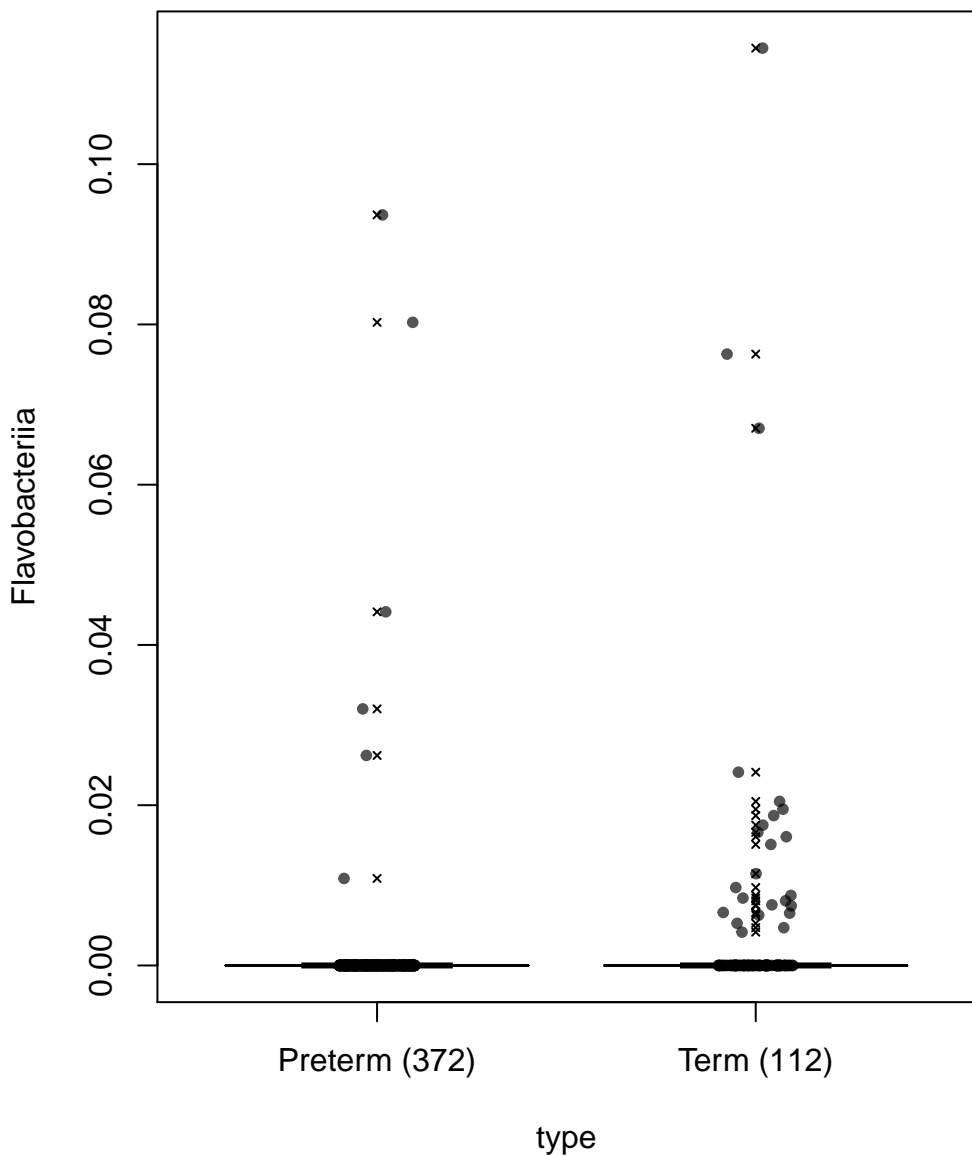

Partial Residual Plot

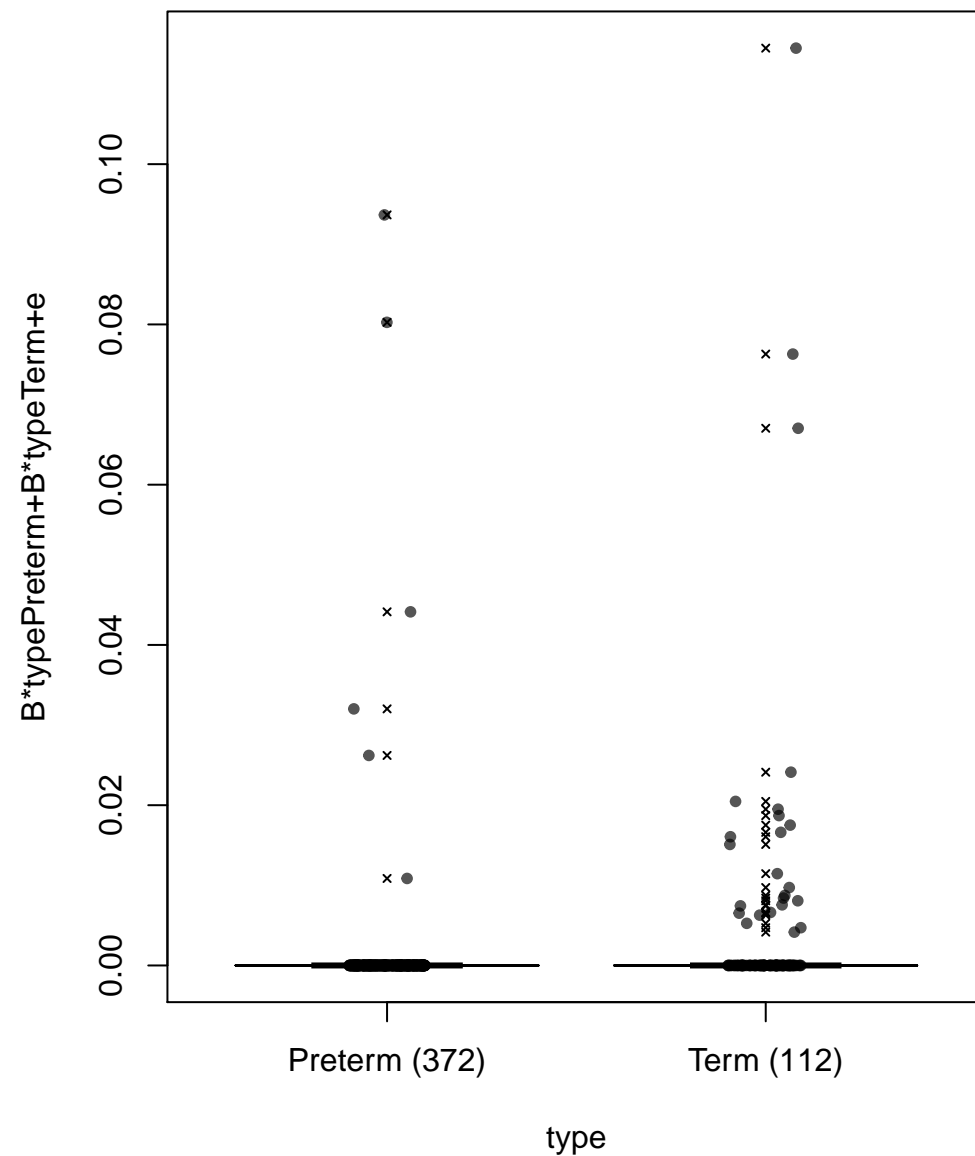

typeTerm (0.00947 sd 0.00268, p=0.000442, q=0.00196)

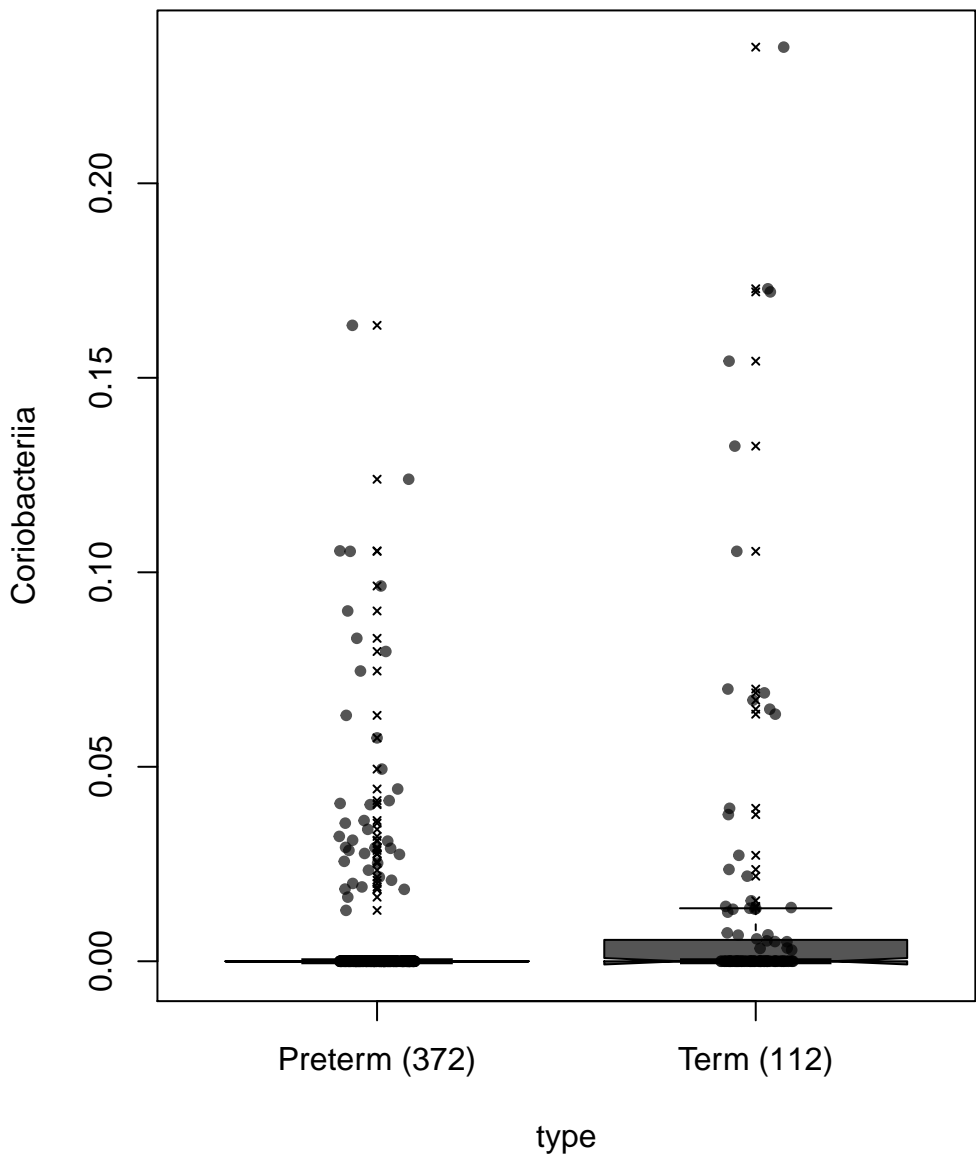

Partial Residual Plot

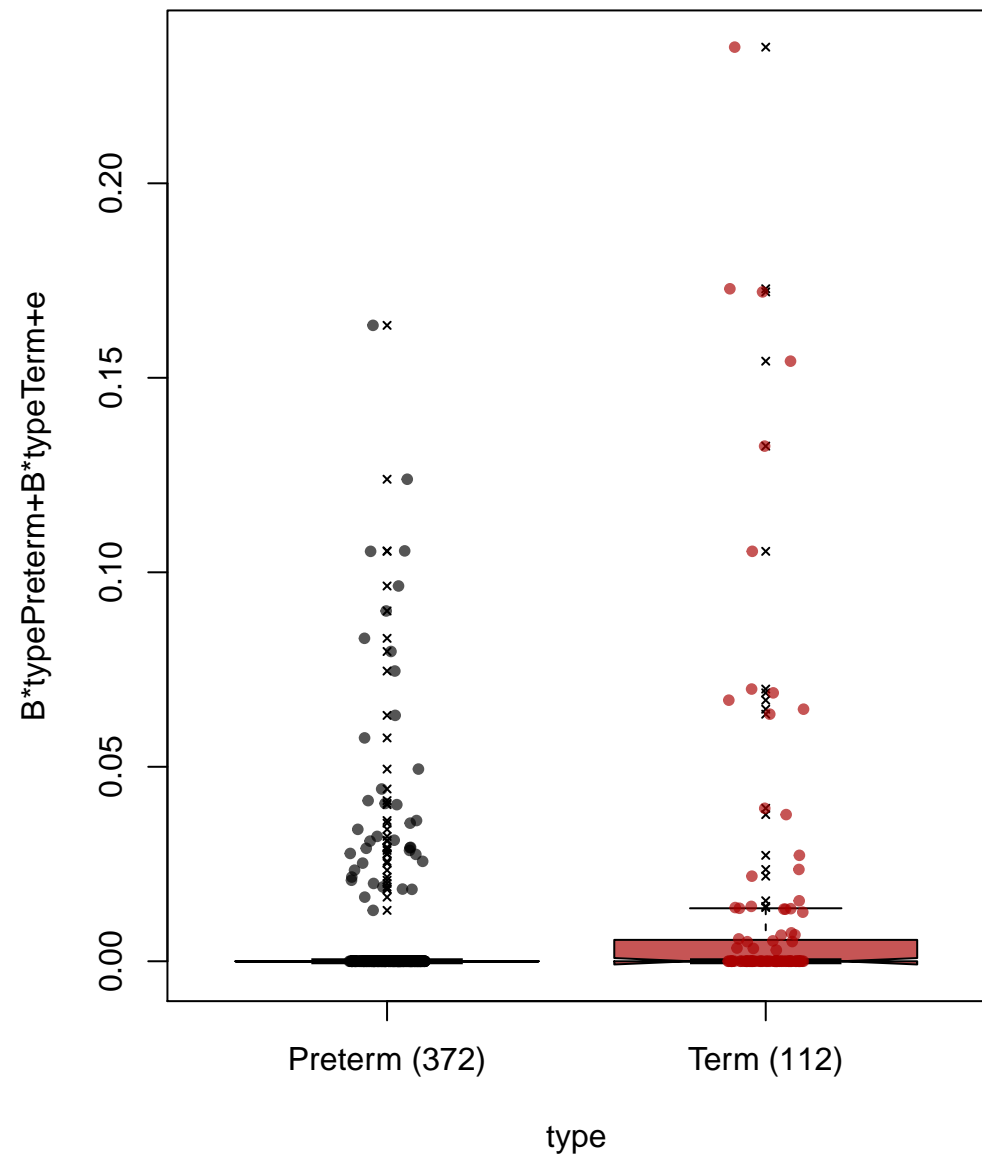

typeTerm (0.00432 sd 0.0013, p=0.000981, q=0.00392)

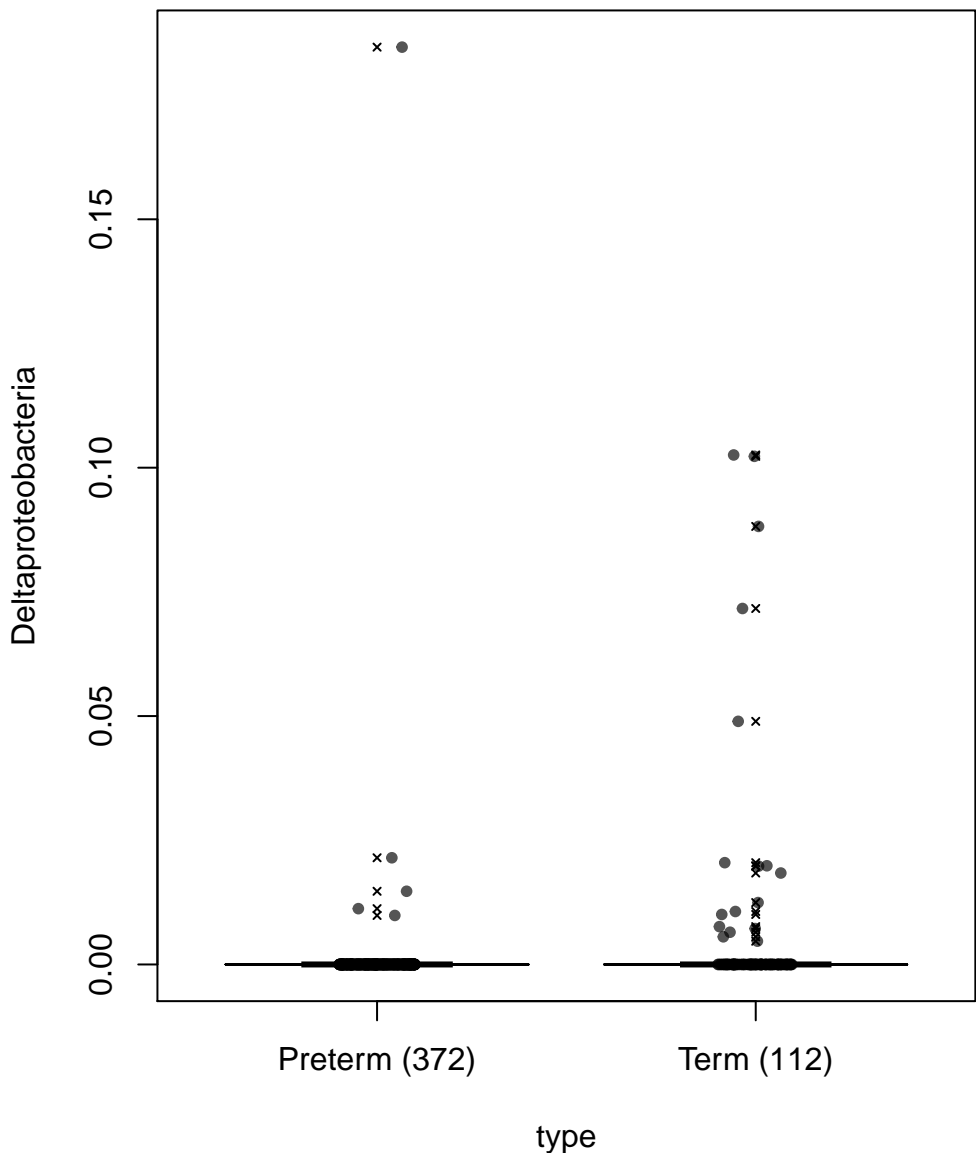

Partial Residual Plot

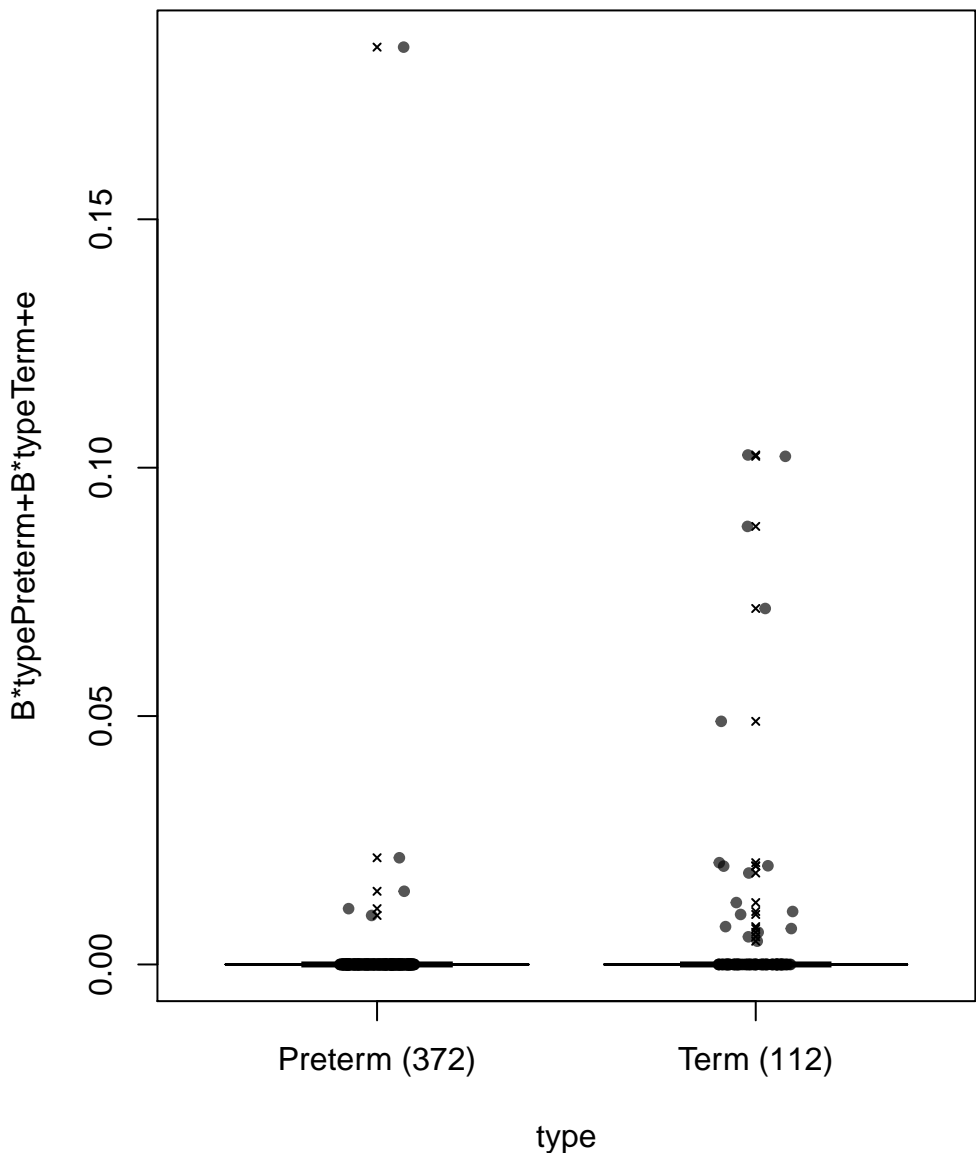

typeTerm (0.0007 sd 0.000219, p=0.00147, q=0.00536)

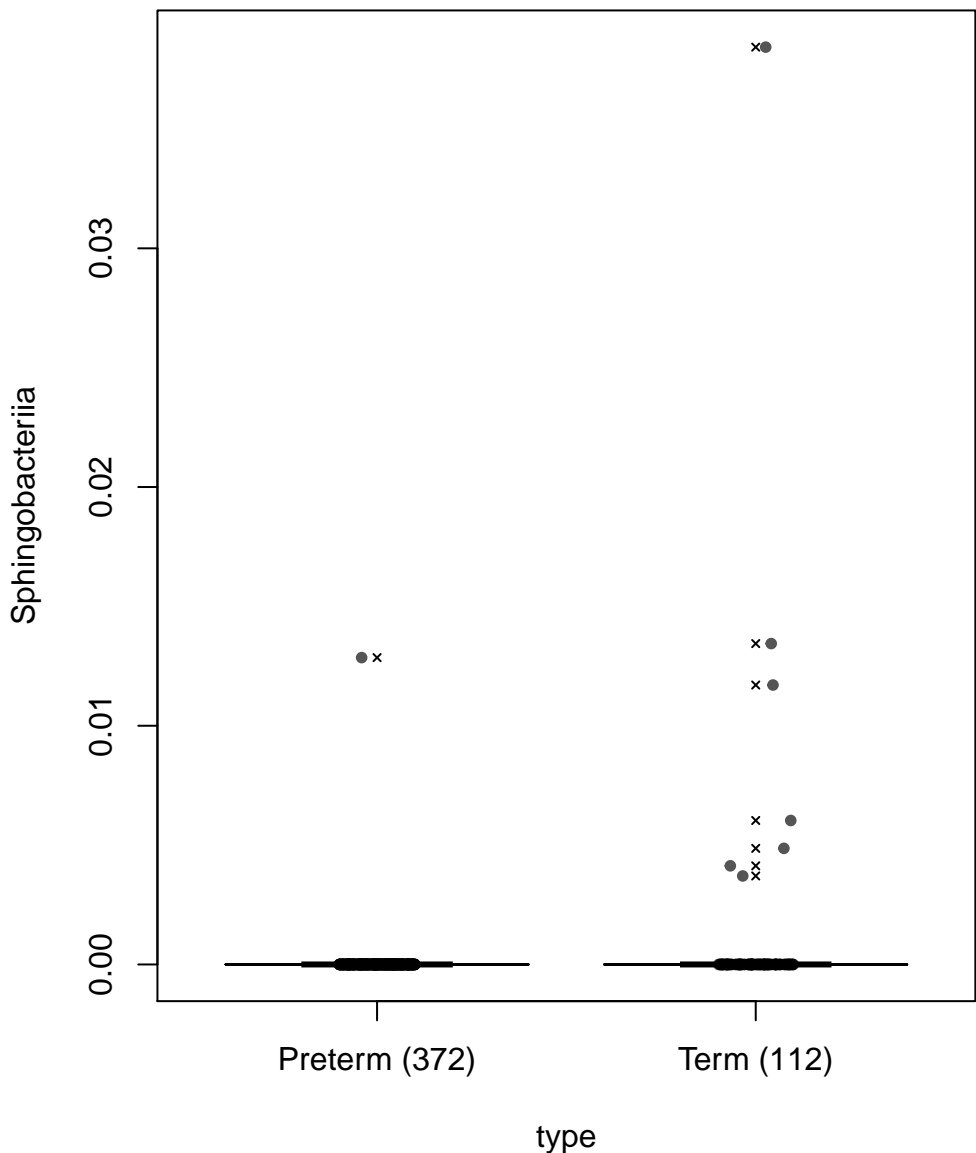

Partial Residual Plot

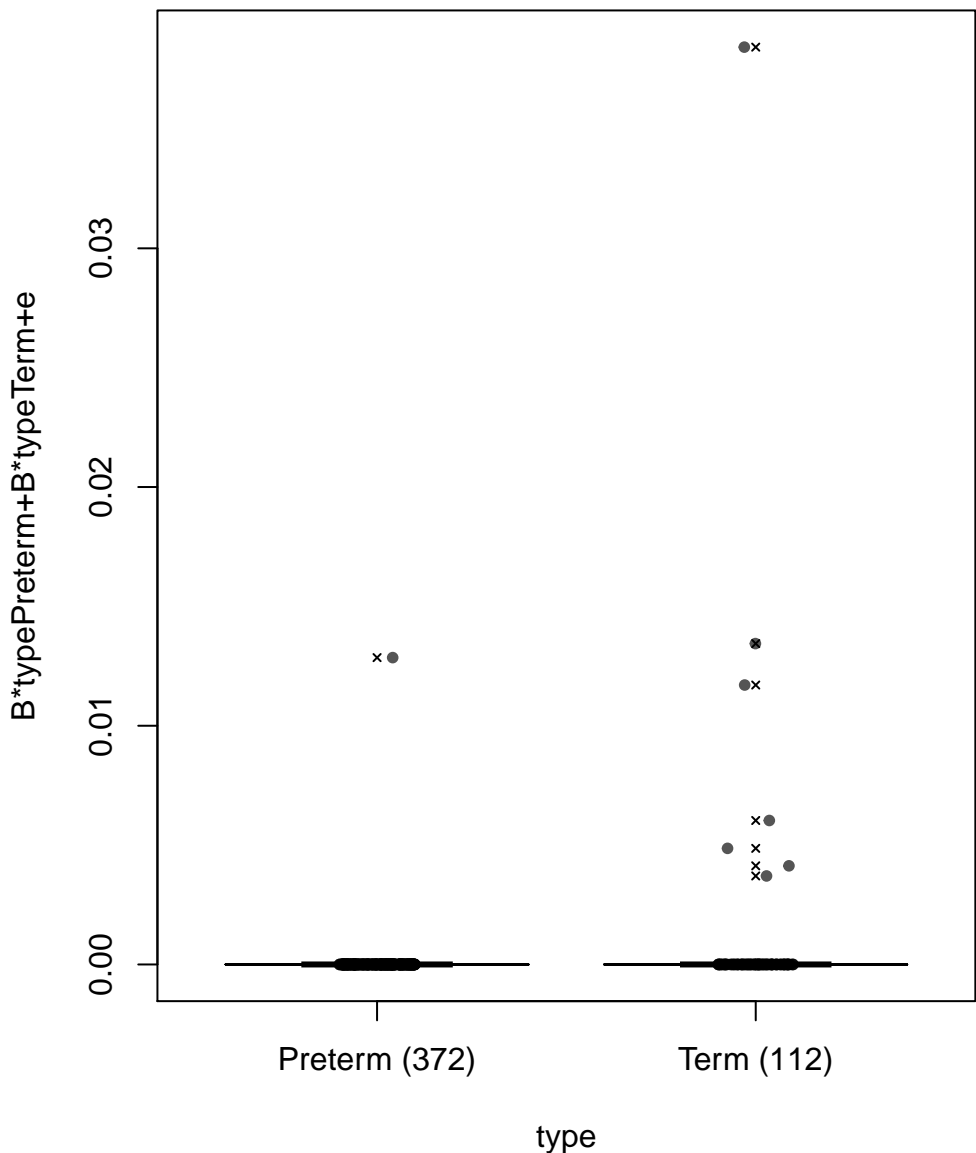

typeTerm (-0.12 sd 0.0424, p=0.00486, q=0.0162)

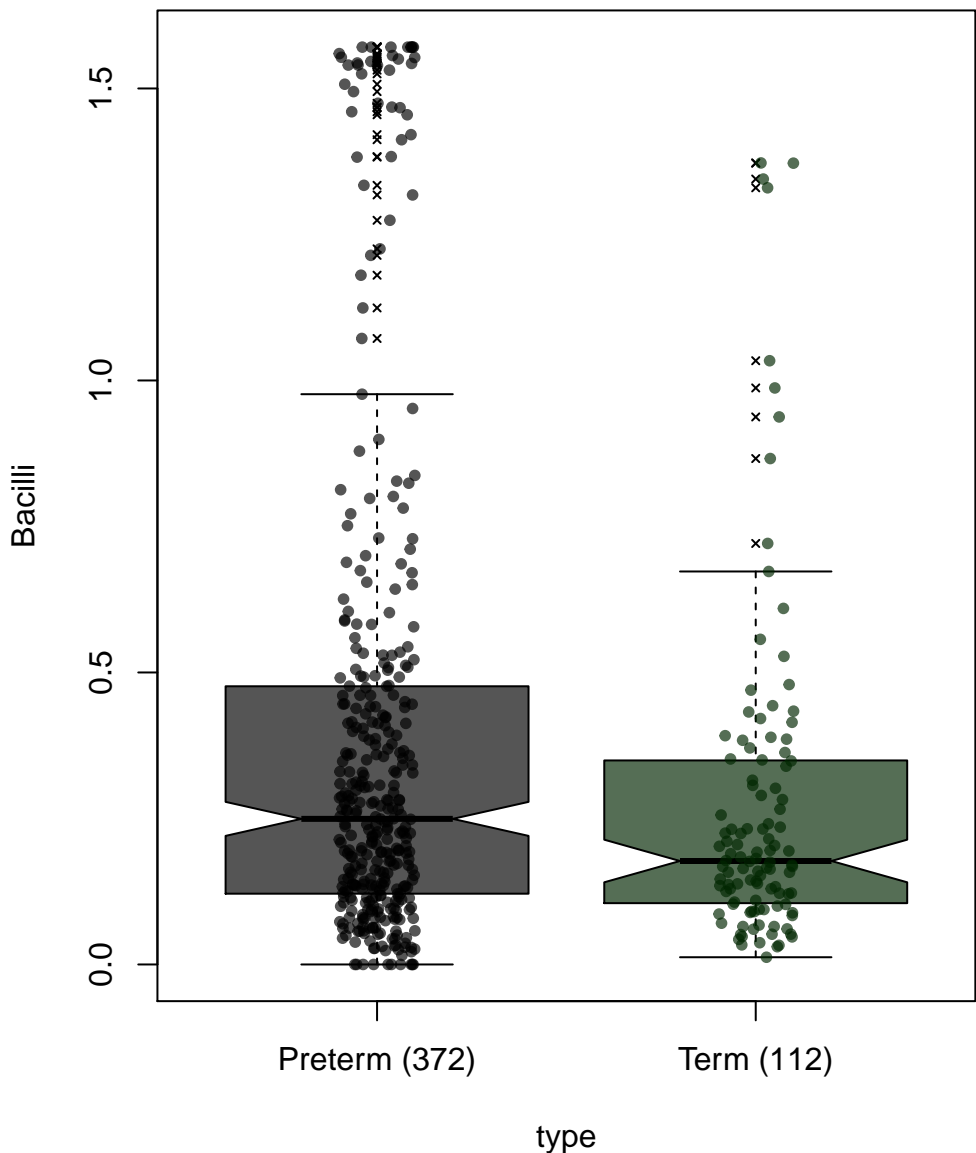

Partial Residual Plot

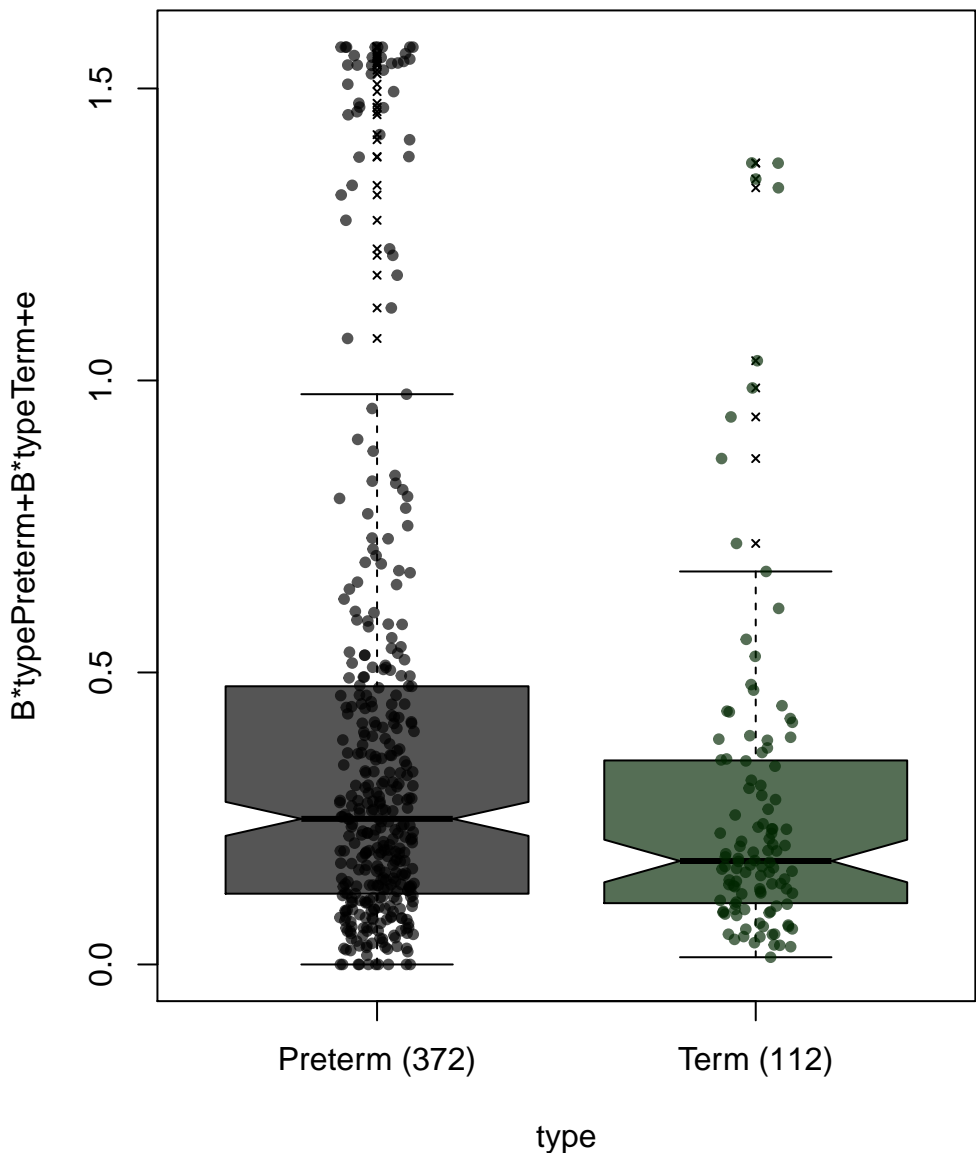

**typeTerm (0.00143 sd 0.000511, p=0.00533, q=0.0164)**

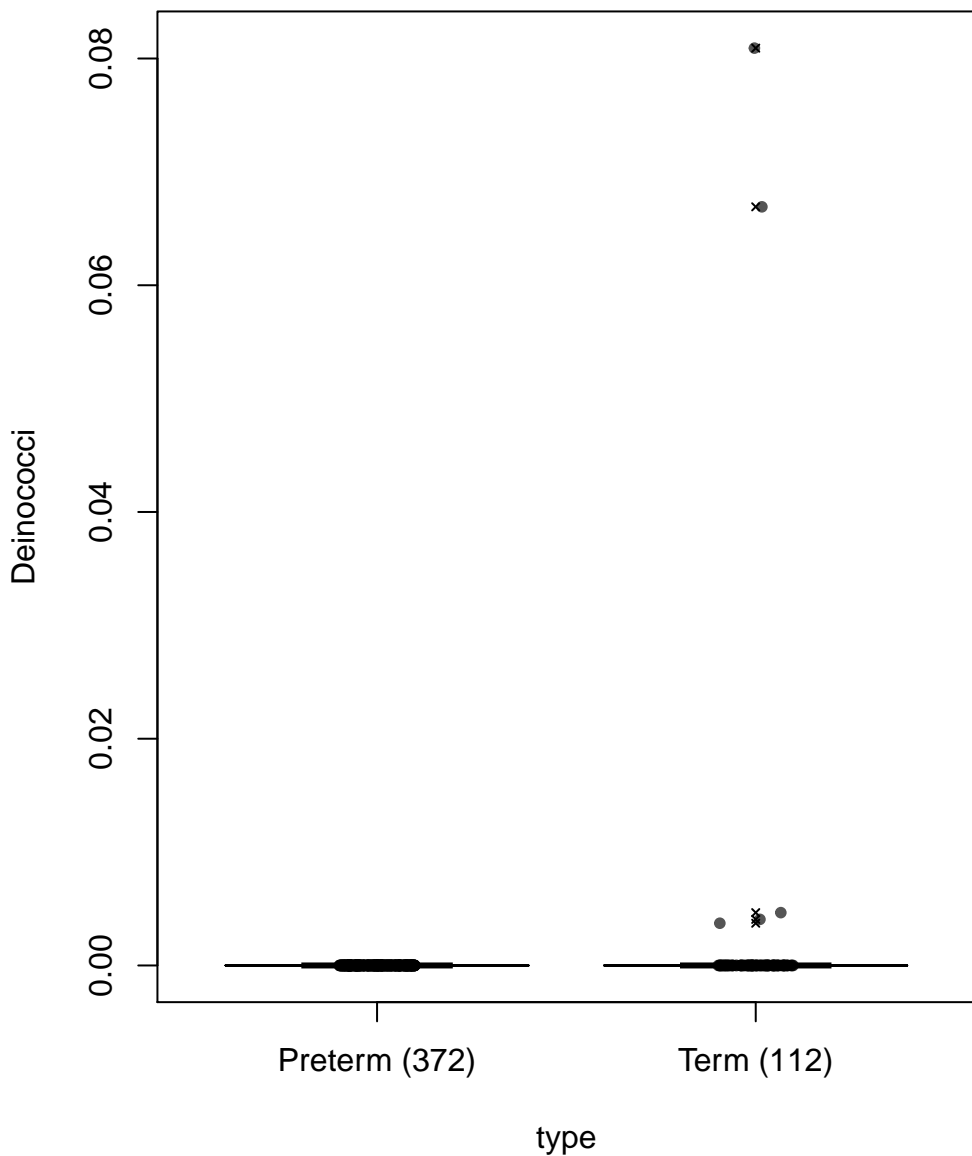

### Partial Residual Plot

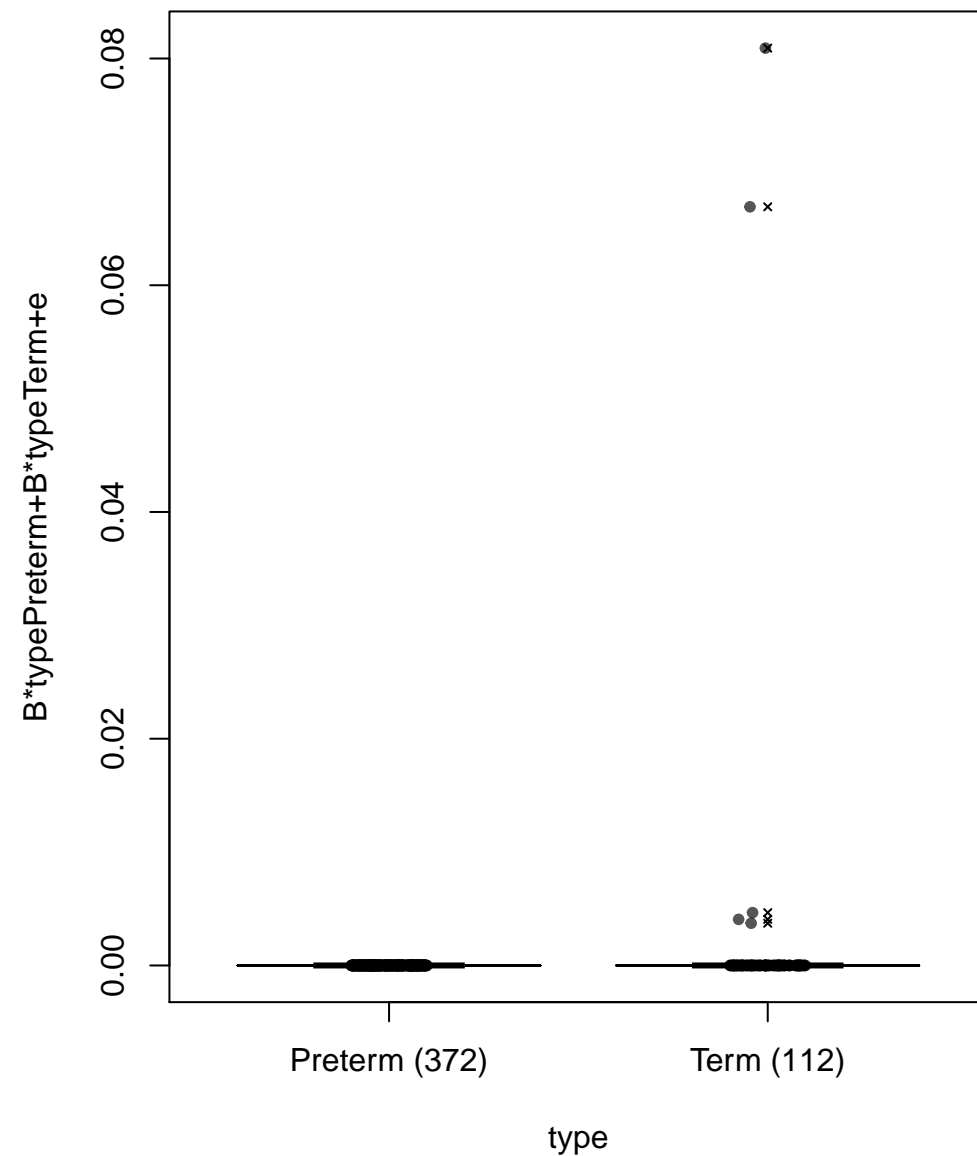

typeTerm (0.000786 sd 0.000309, p=0.0111, q=0.0318)

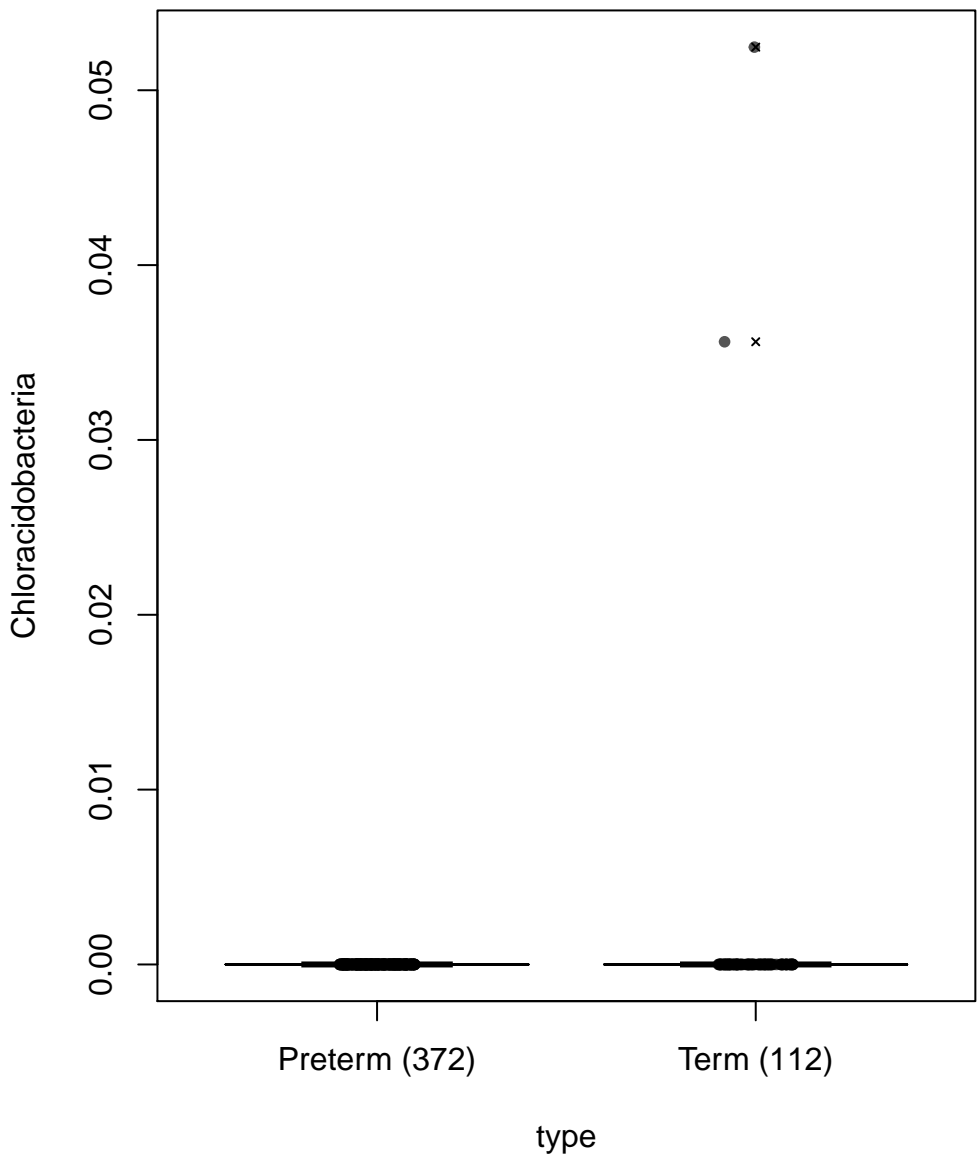

Partial Residual Plot

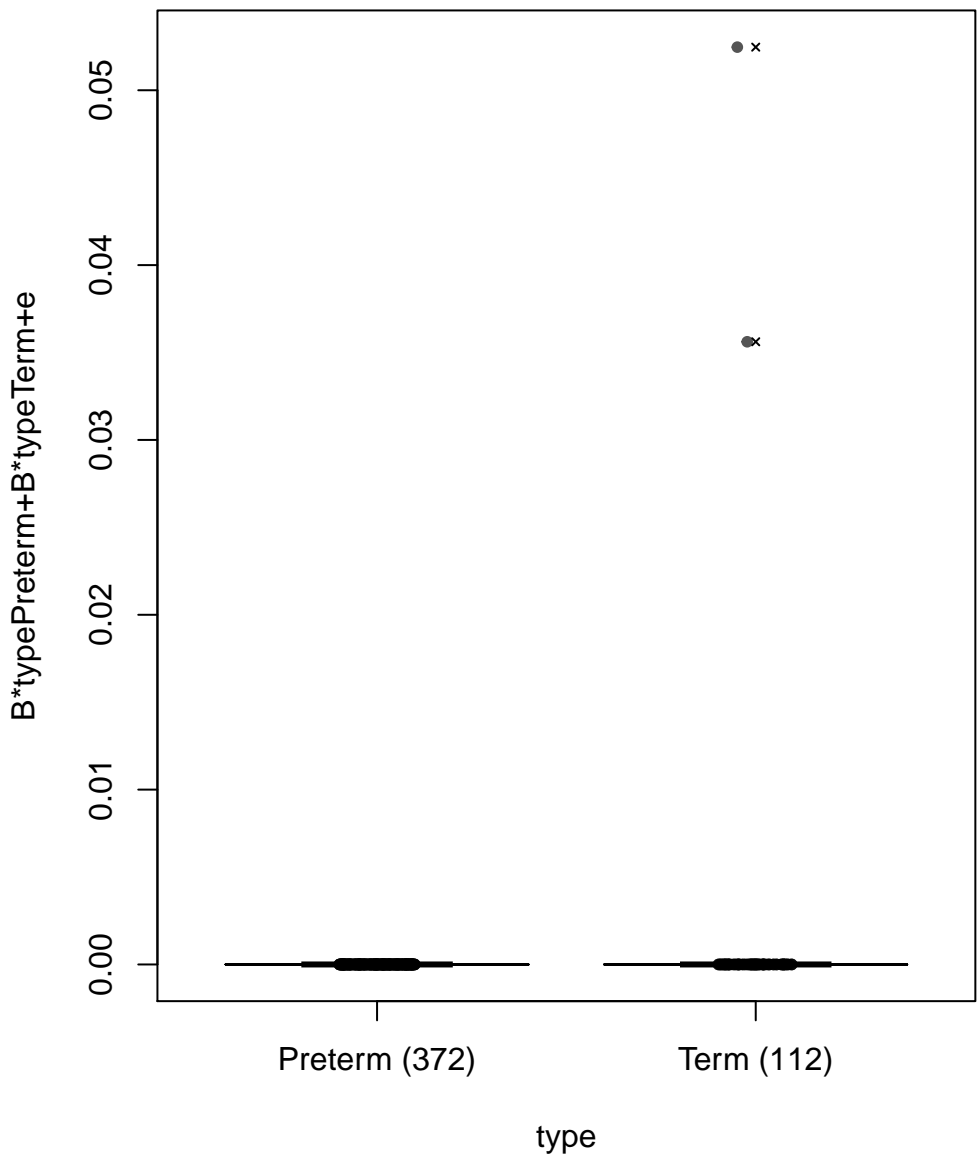

Supplement: s1 [file s1]
