# Supplementary material for: Predicted Metabolic Pathway Distributions in Stool Bacteria in Very-Low-Birth-Weight Infants: Potential Relationships with NICU Faltered Growth
Source: MDPI journal article supplement (doi:10.3390/nu12051345), 2020-05-08

## Supplementary data

Metabolic Pathway Distributions in Very Low Birth Weight Infants:  
Potential Relationships with NICU Faltered Growth

**S2. Association of the relative abundance of bacterial Order between VLBW infants and term infants.** Each page of this file shows a separate bacterial order which was significantly different between the two groups. The box plots indicate the association of the metadata (here, the two groups preterm and term infants) with the relative abundances. The strength of association is indicated by the p-value and an FDR-corrected q-value. The partial residual plot shows the relationship between the groups with abundances when all other variables are included in the model.

typeTerm (0.0144 sd 0.000918, p=4.01e-45, q=2.69e-43)

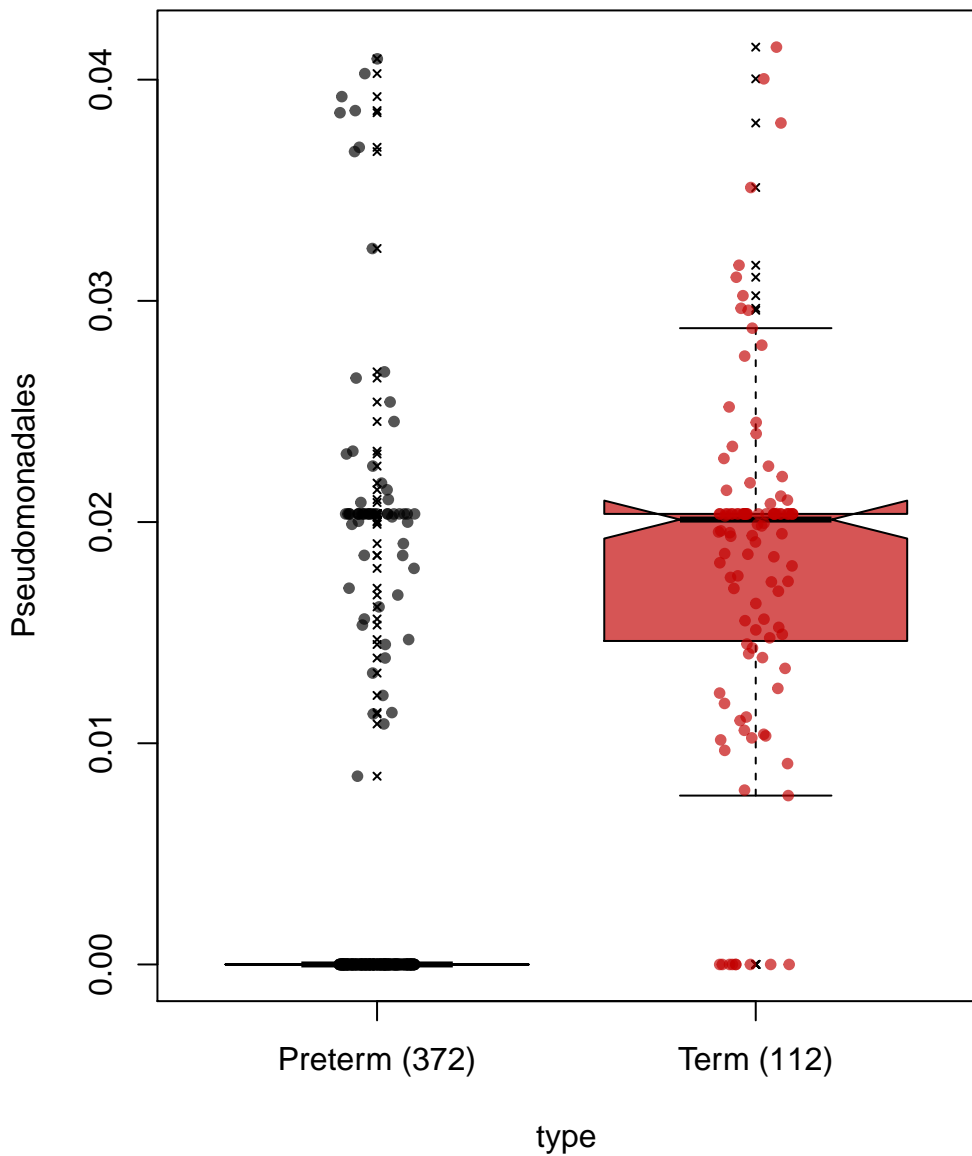

Partial Residual Plot

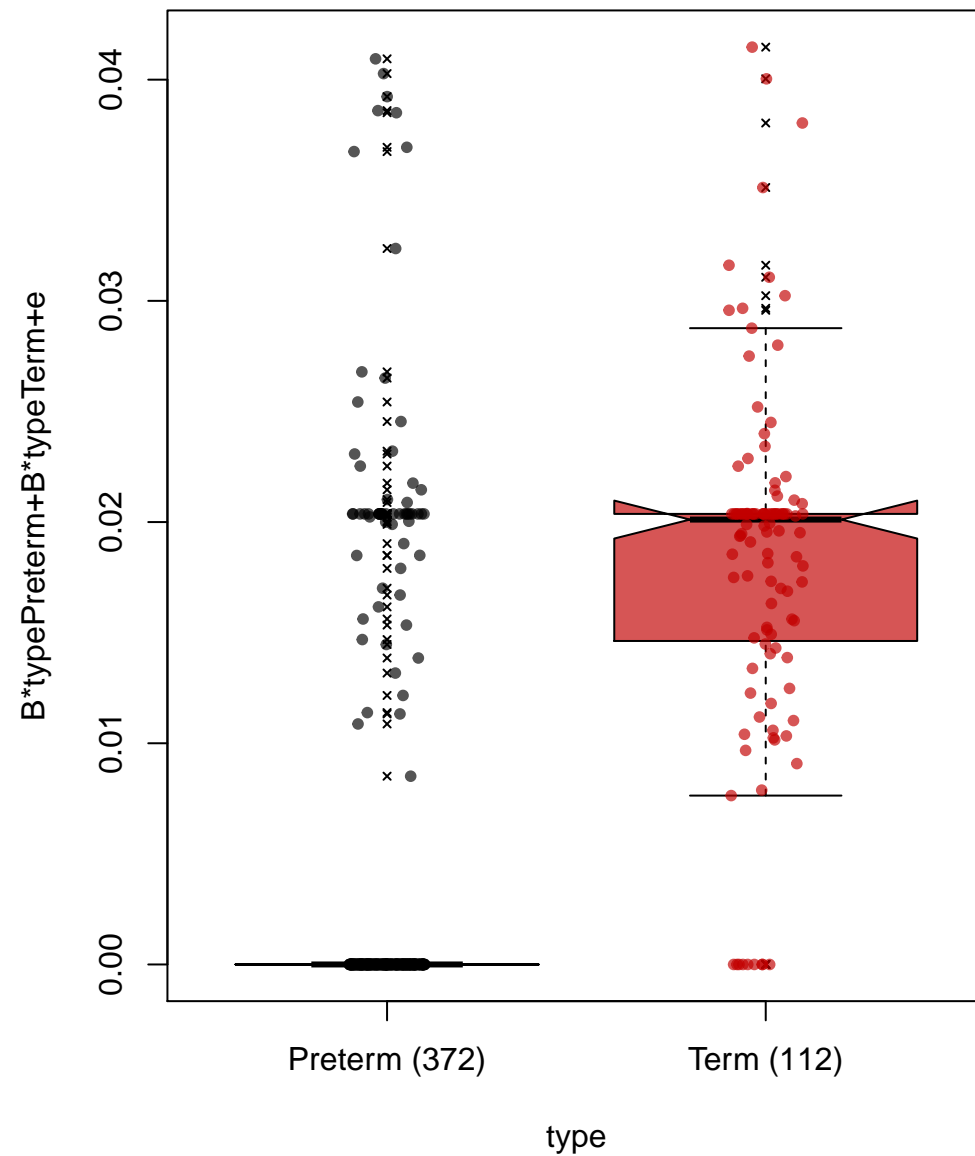

typeTerm (0.0107 sd 0.000705, p=1.13e-42, q=3.78e-41)

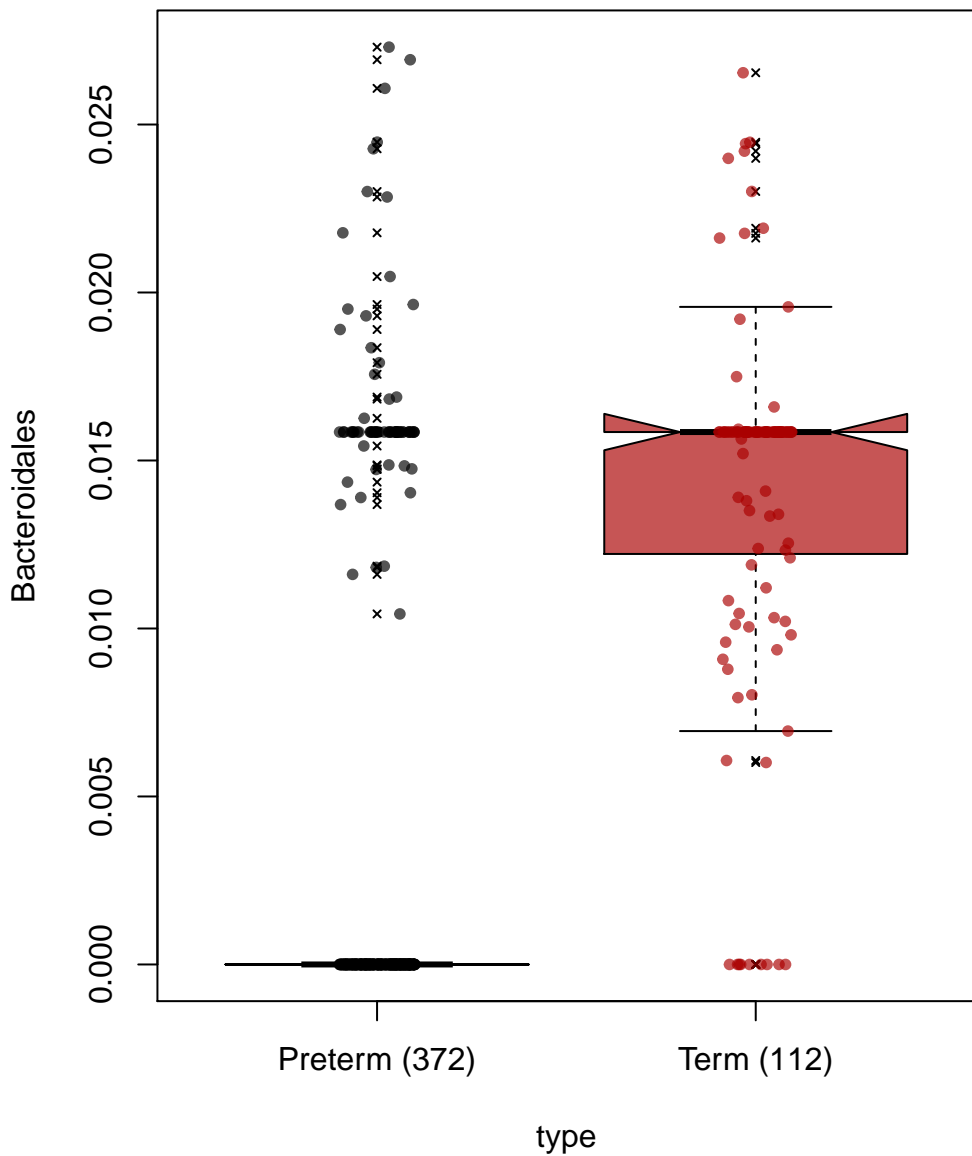

Partial Residual Plot

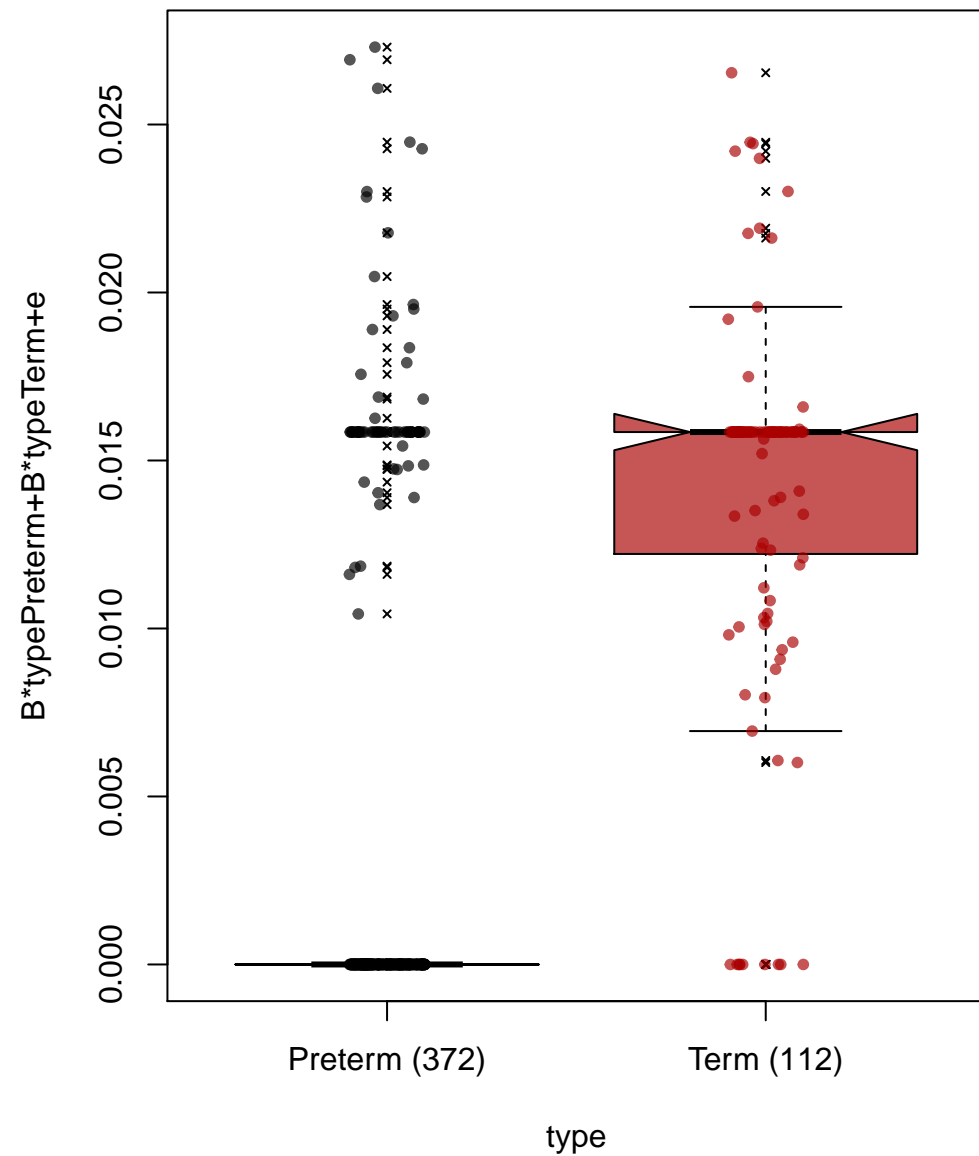

typeTerm (0.018 sd 0.00175, p=2.03e-22, q=4.52e-21)

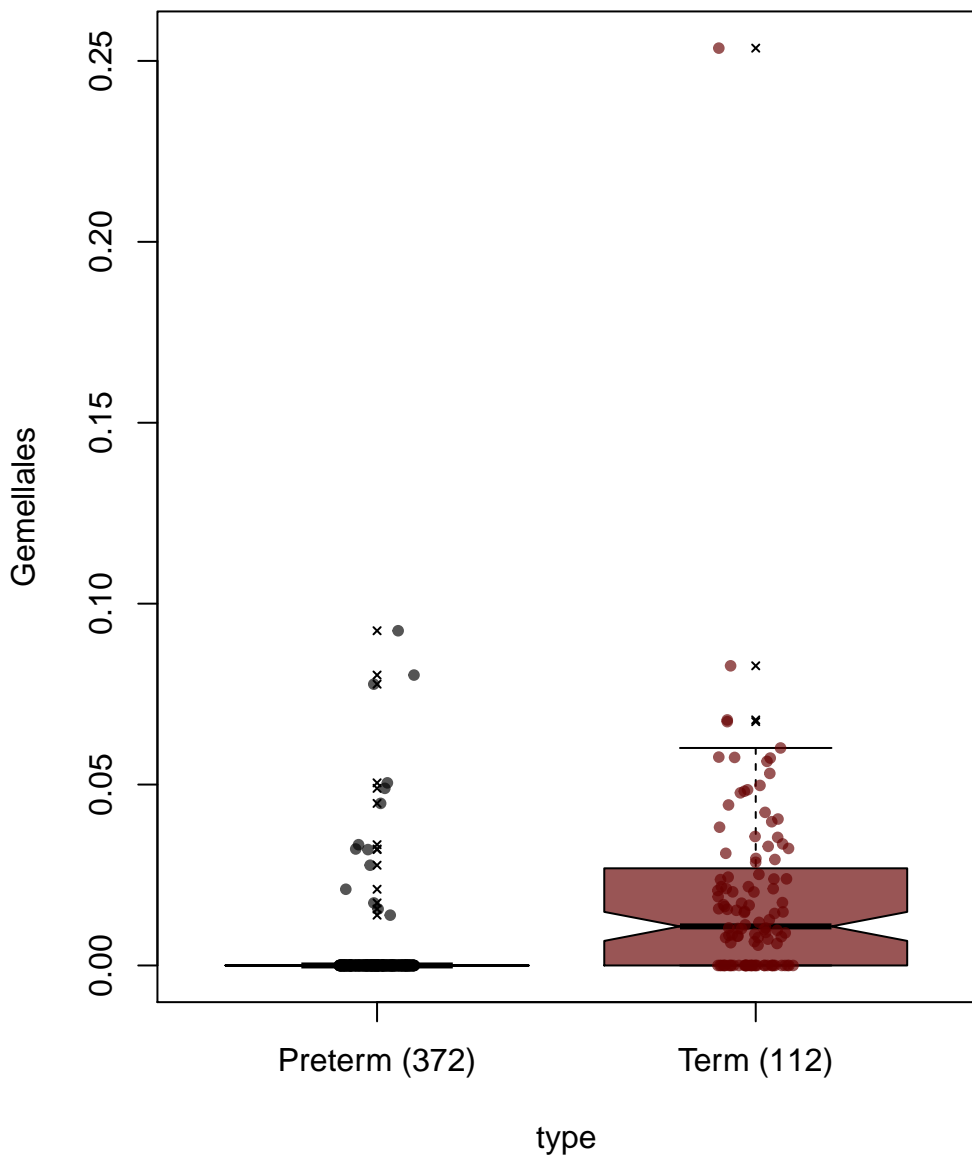

Partial Residual Plot

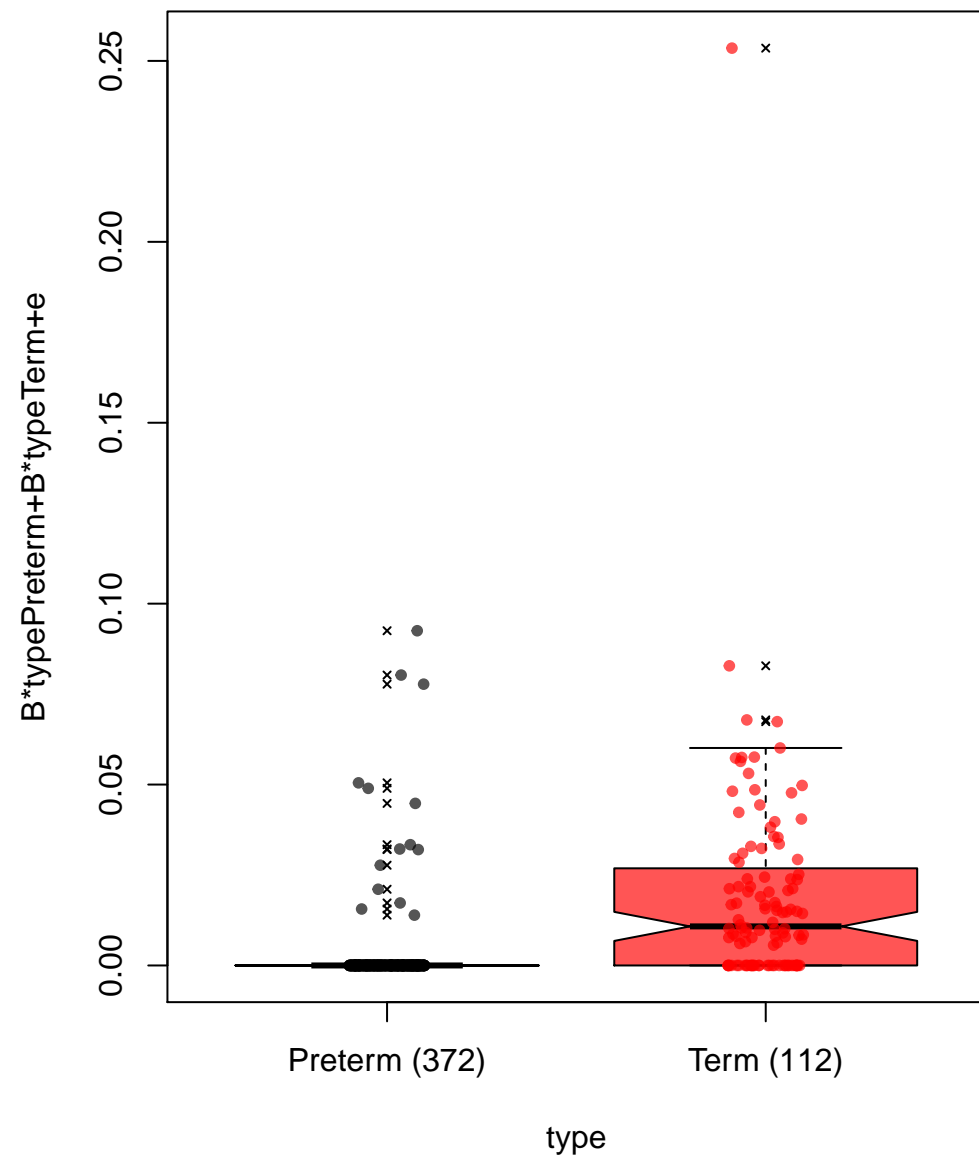

typeTerm ( $-0.406$  sd  $0.0477$ ,  $p=2.3e-16$ ,  $q=3.85e-15$ )

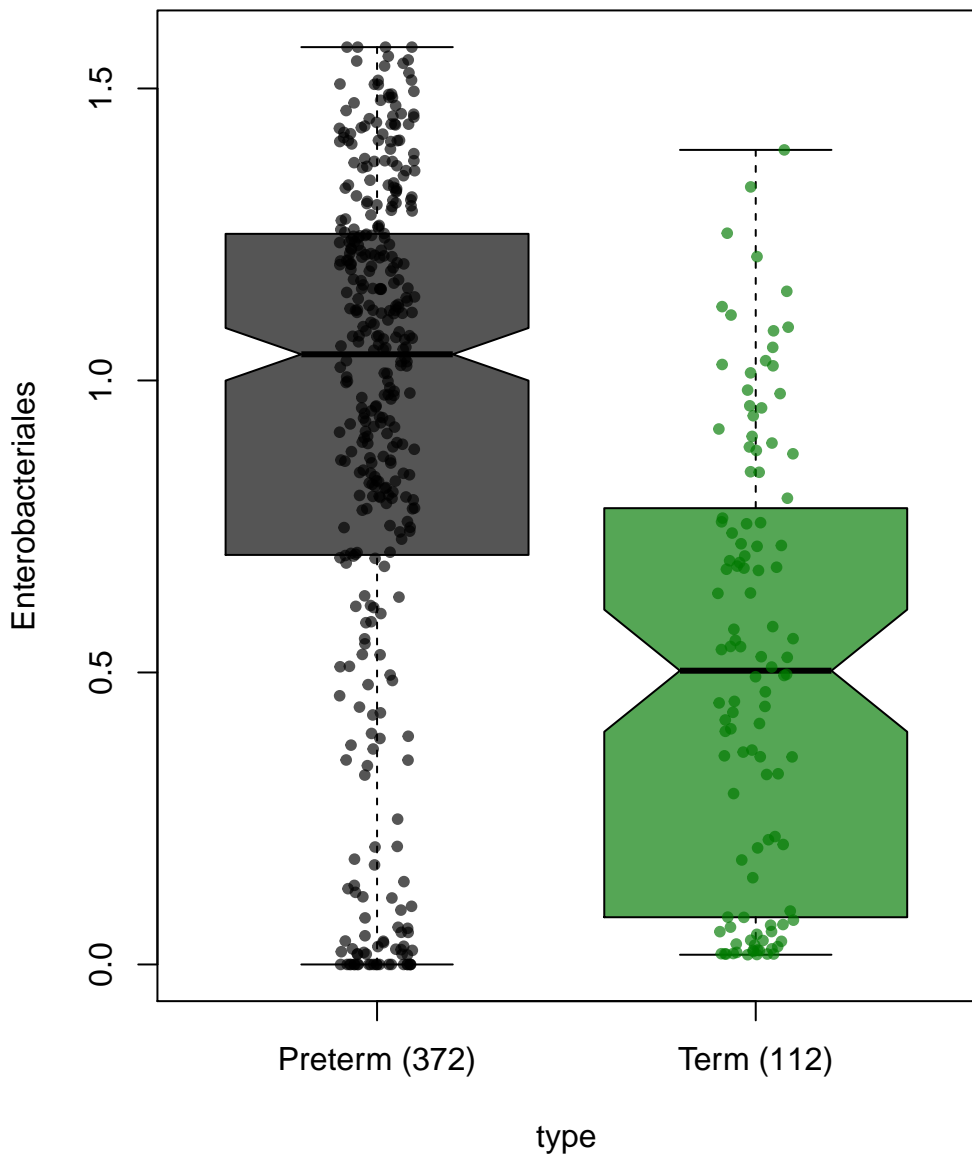

Partial Residual Plot

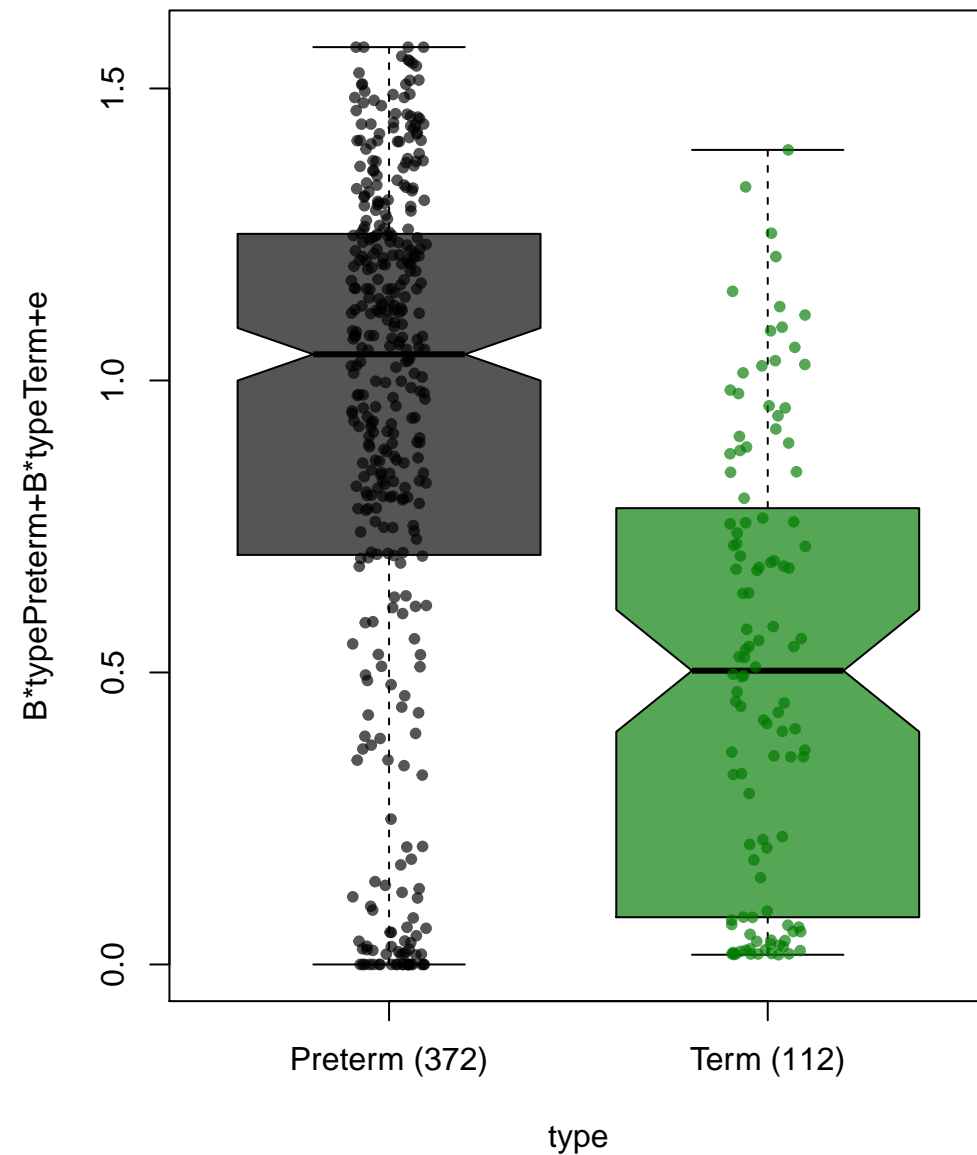

typeTerm (0.0525 sd 0.00709, p=5.83e-13, q=7.81e-12)

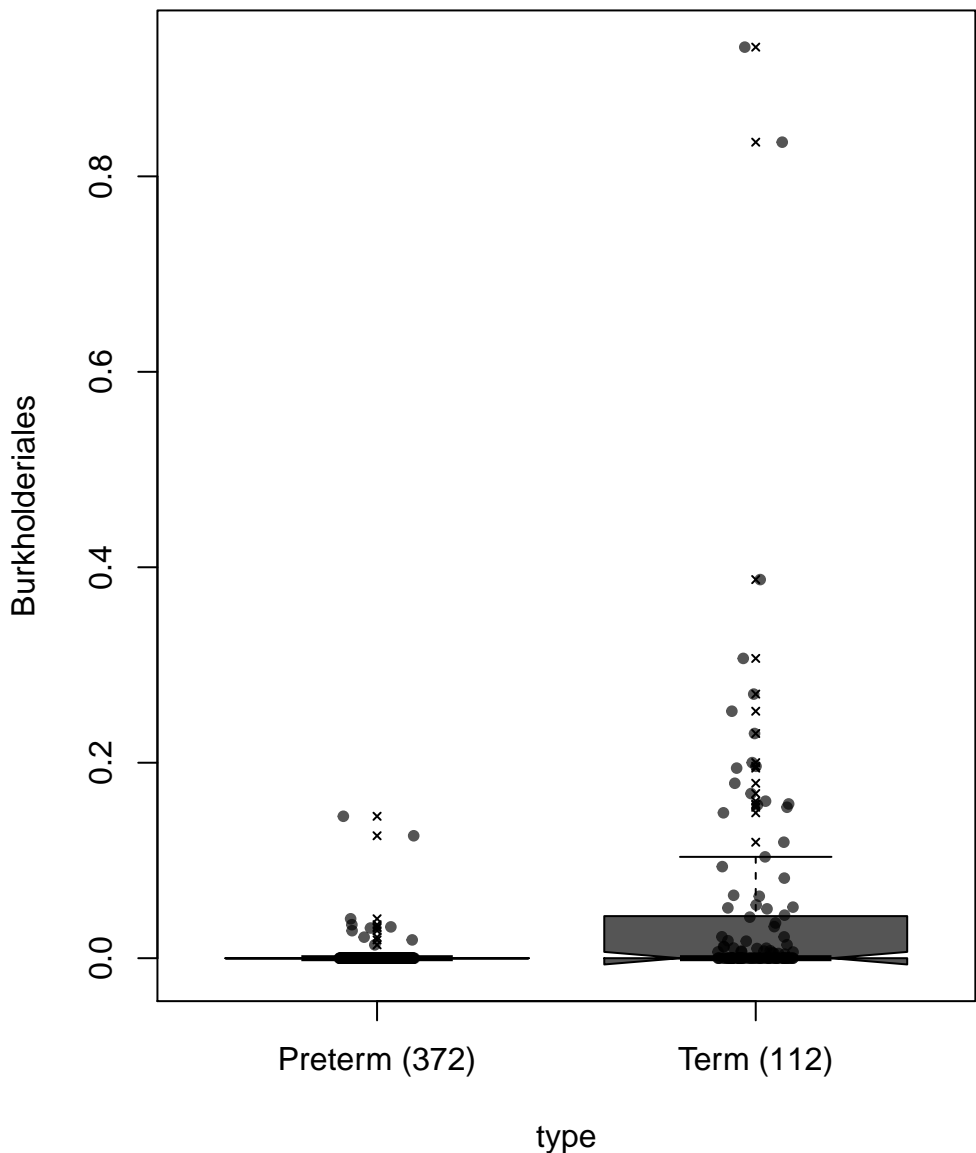

Partial Residual Plot

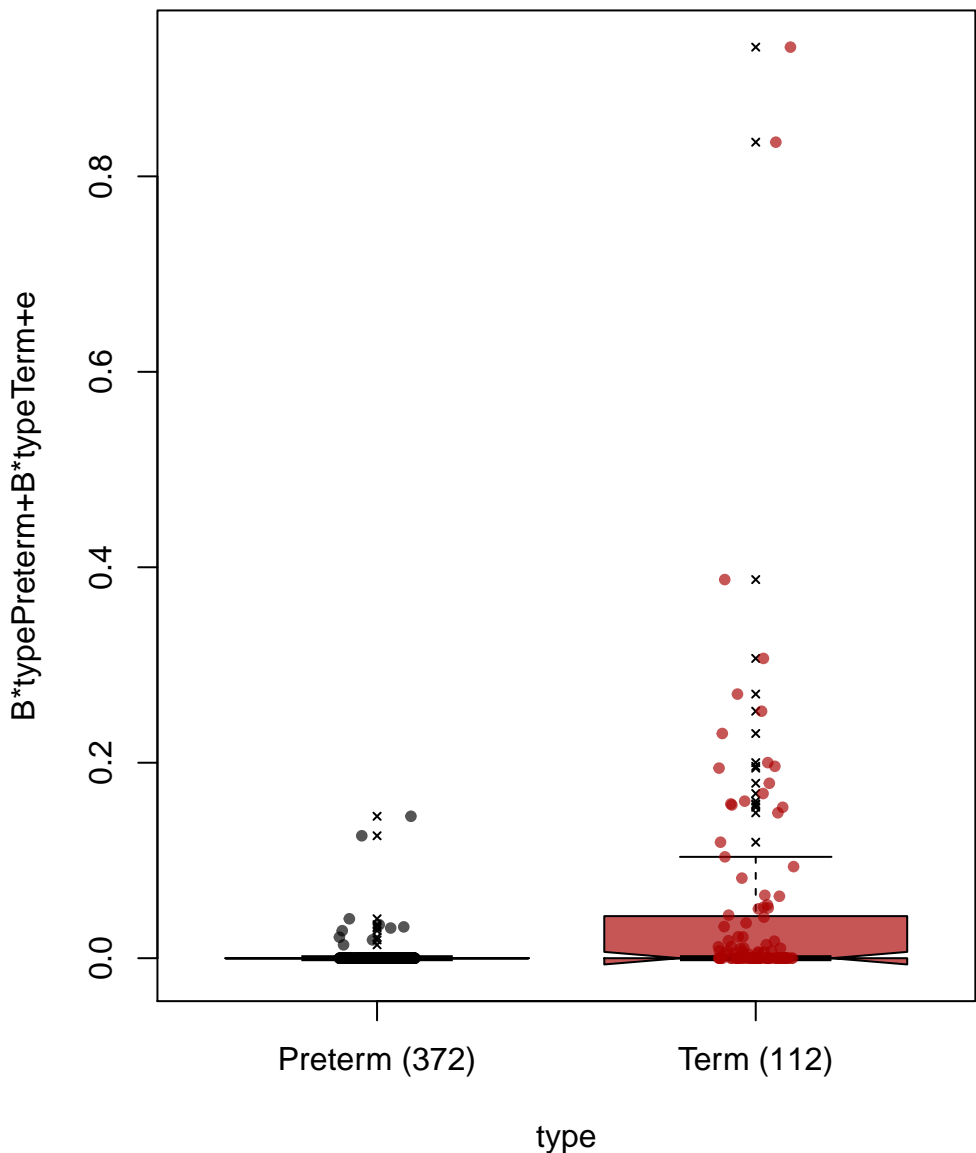

typeTerm (0.0666 sd 0.00909, p=9.98e-13, q=1.11e-11)

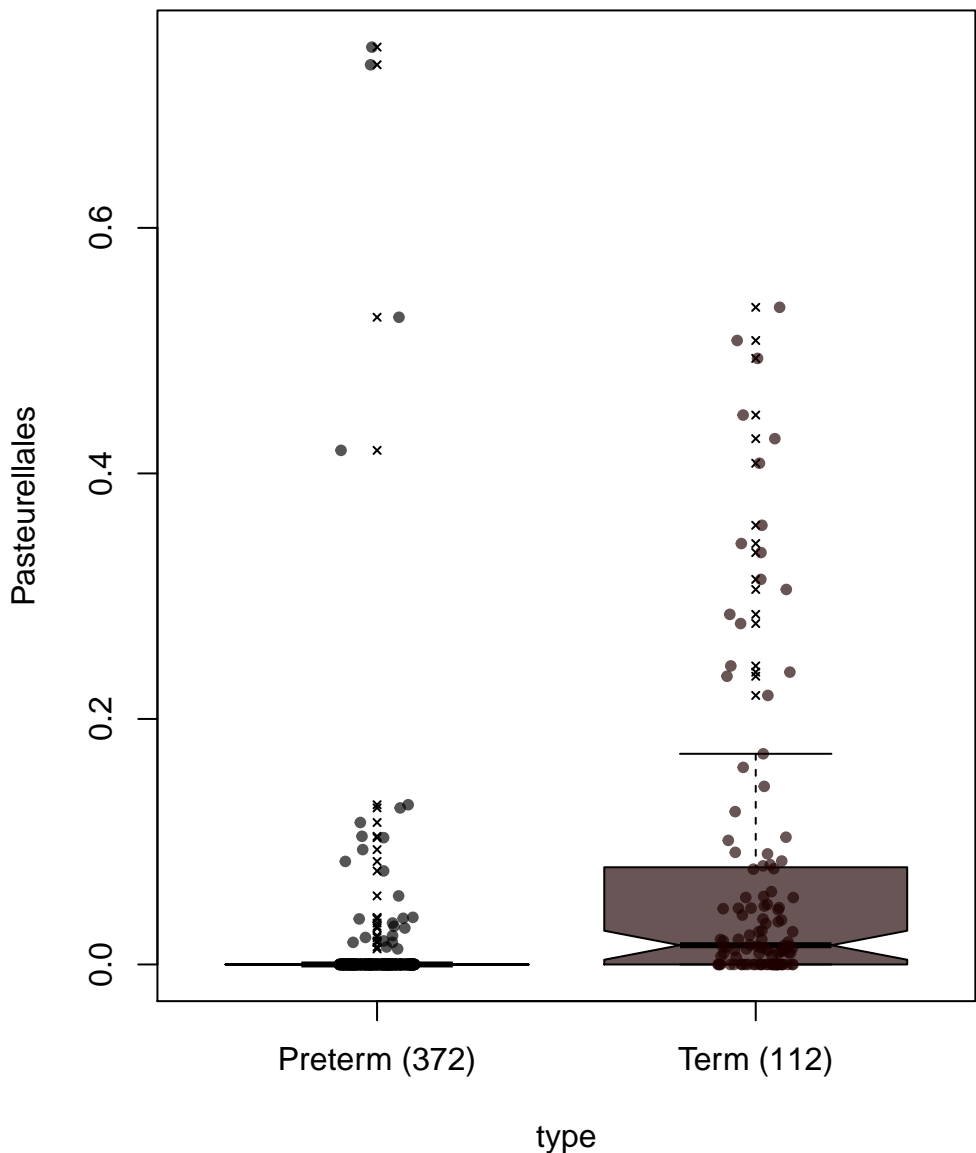

Partial Residual Plot

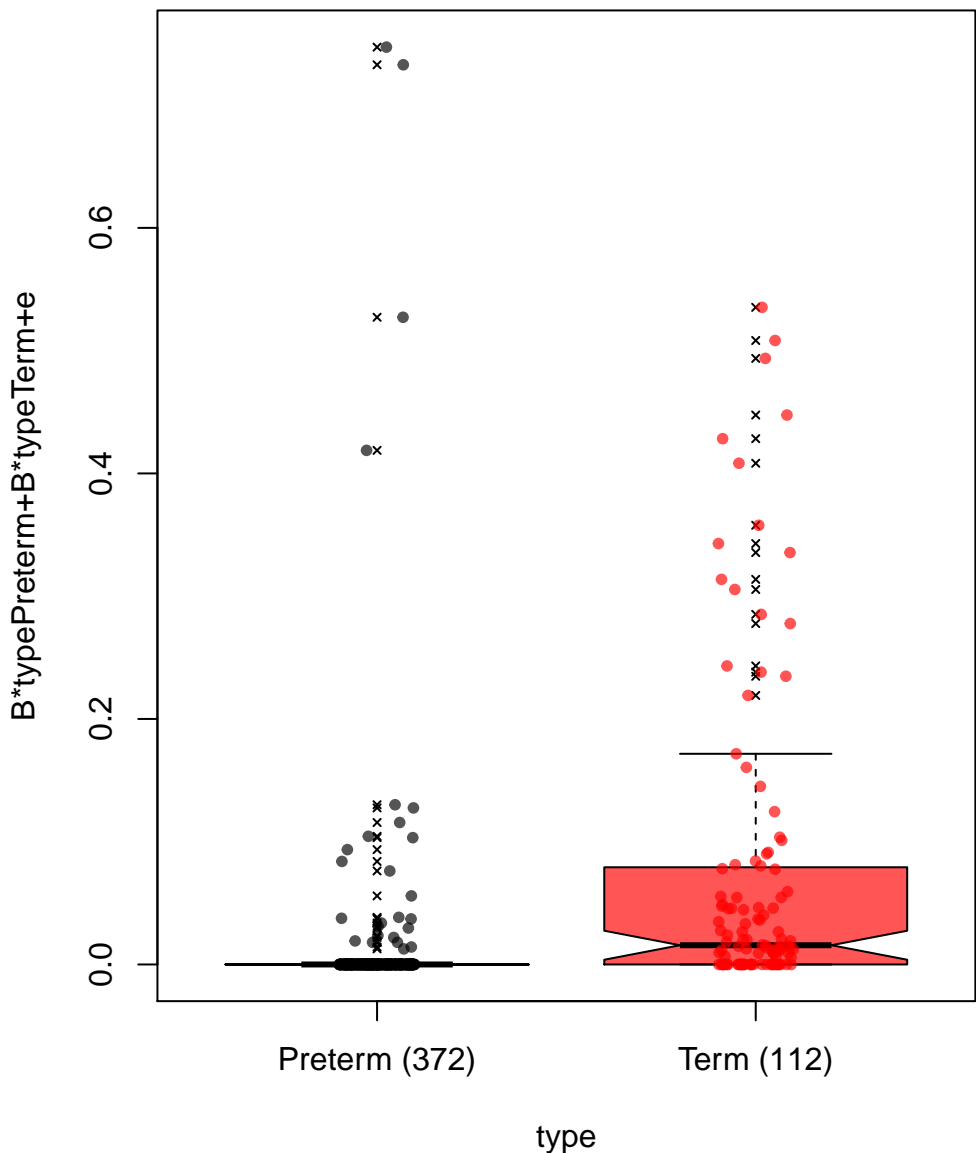

typeTerm (0.0259 sd 0.00387, p=6.2e-11, q=5.93e-10)

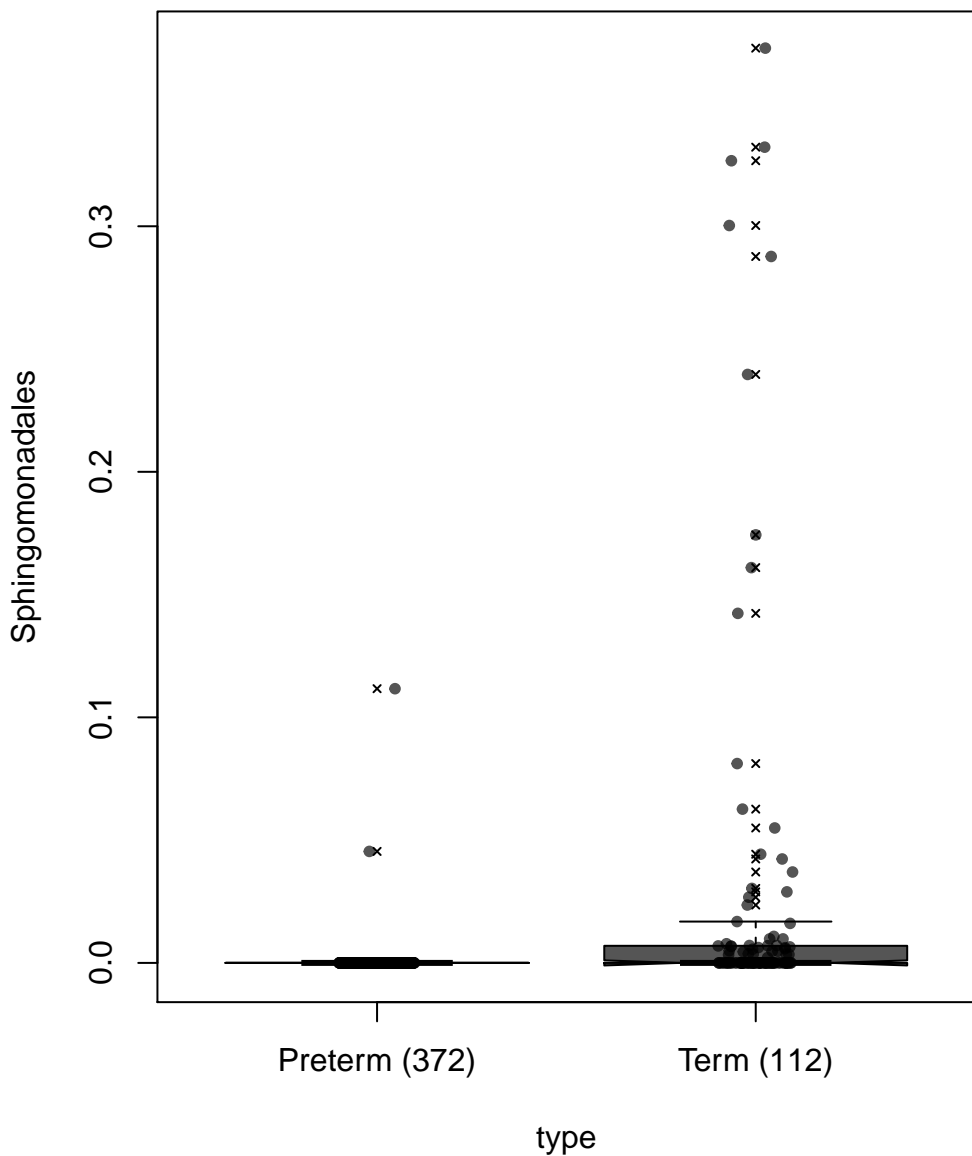

Partial Residual Plot

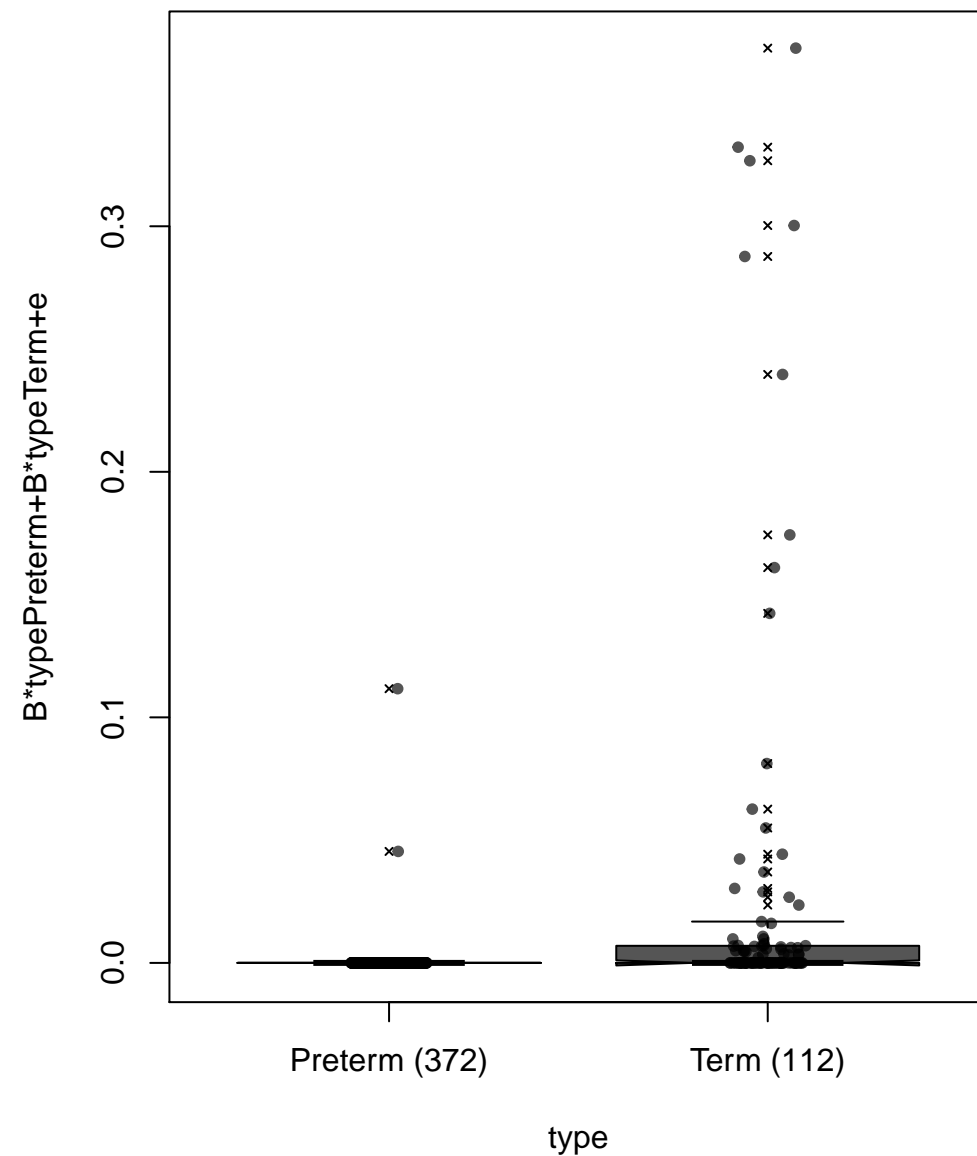



typeTerm (0.0251 sd 0.0046, p=7.39e-08, q=6.19e-07)

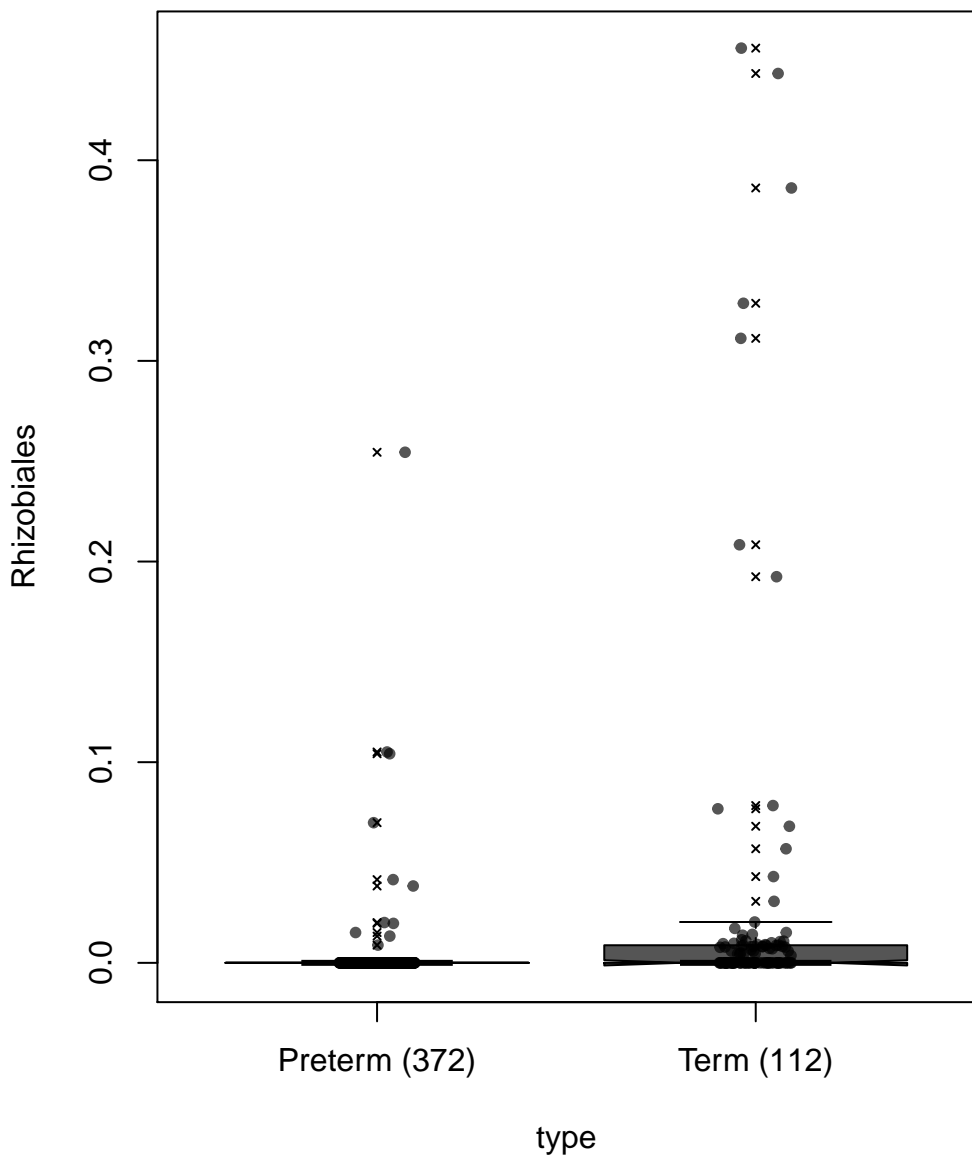

Partial Residual Plot

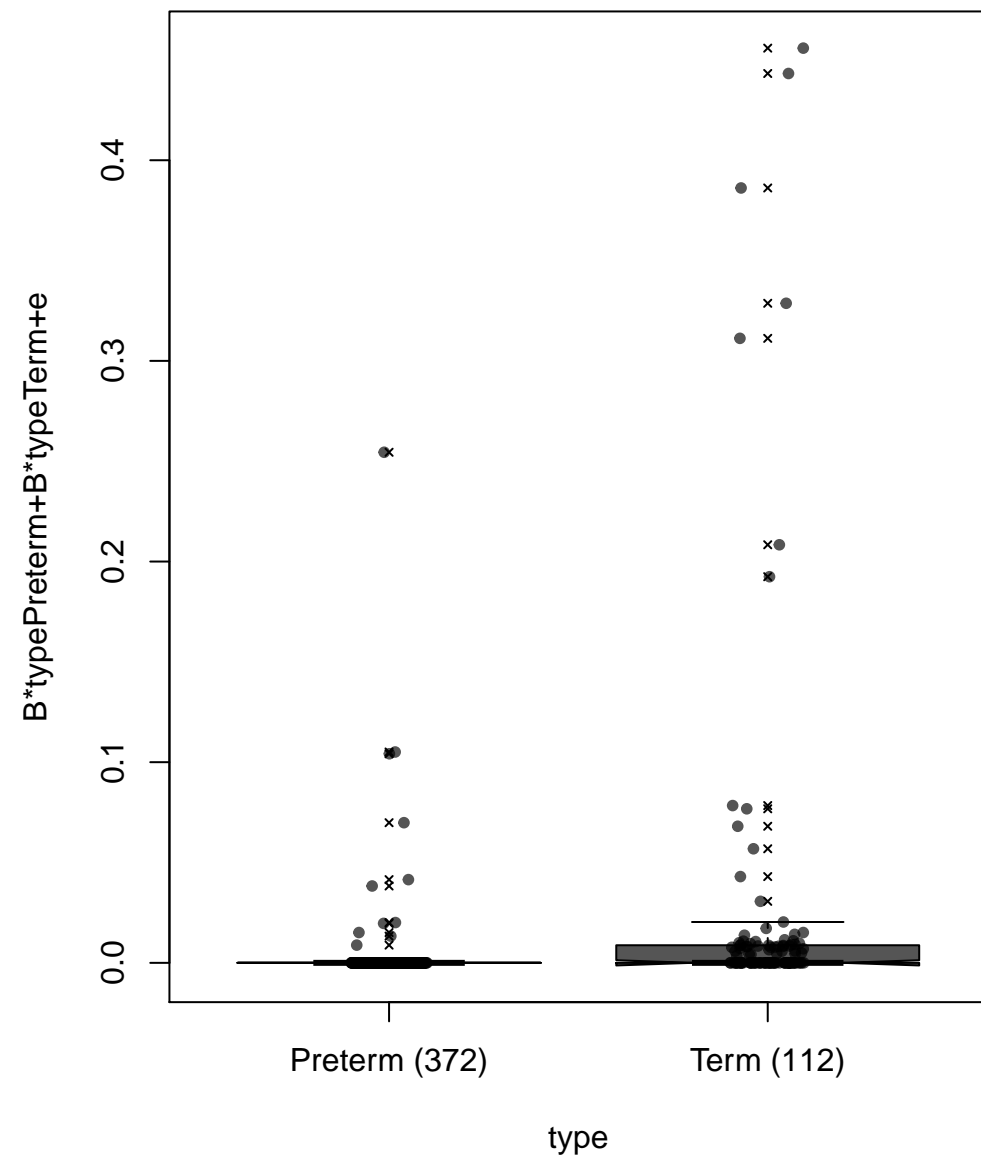

typeTerm (0.0169 sd 0.00321, p=2.18e-07, q=1.51e-06)

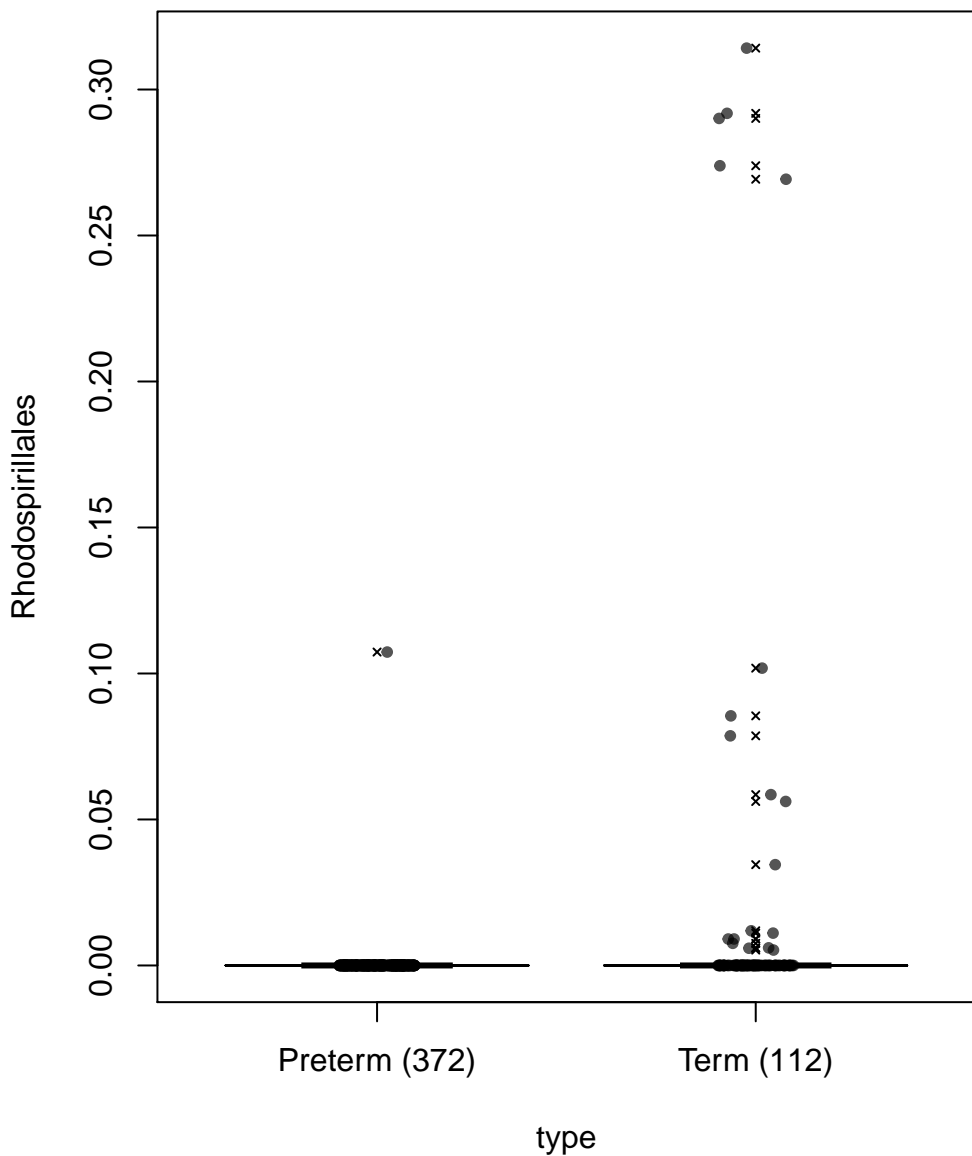

Partial Residual Plot

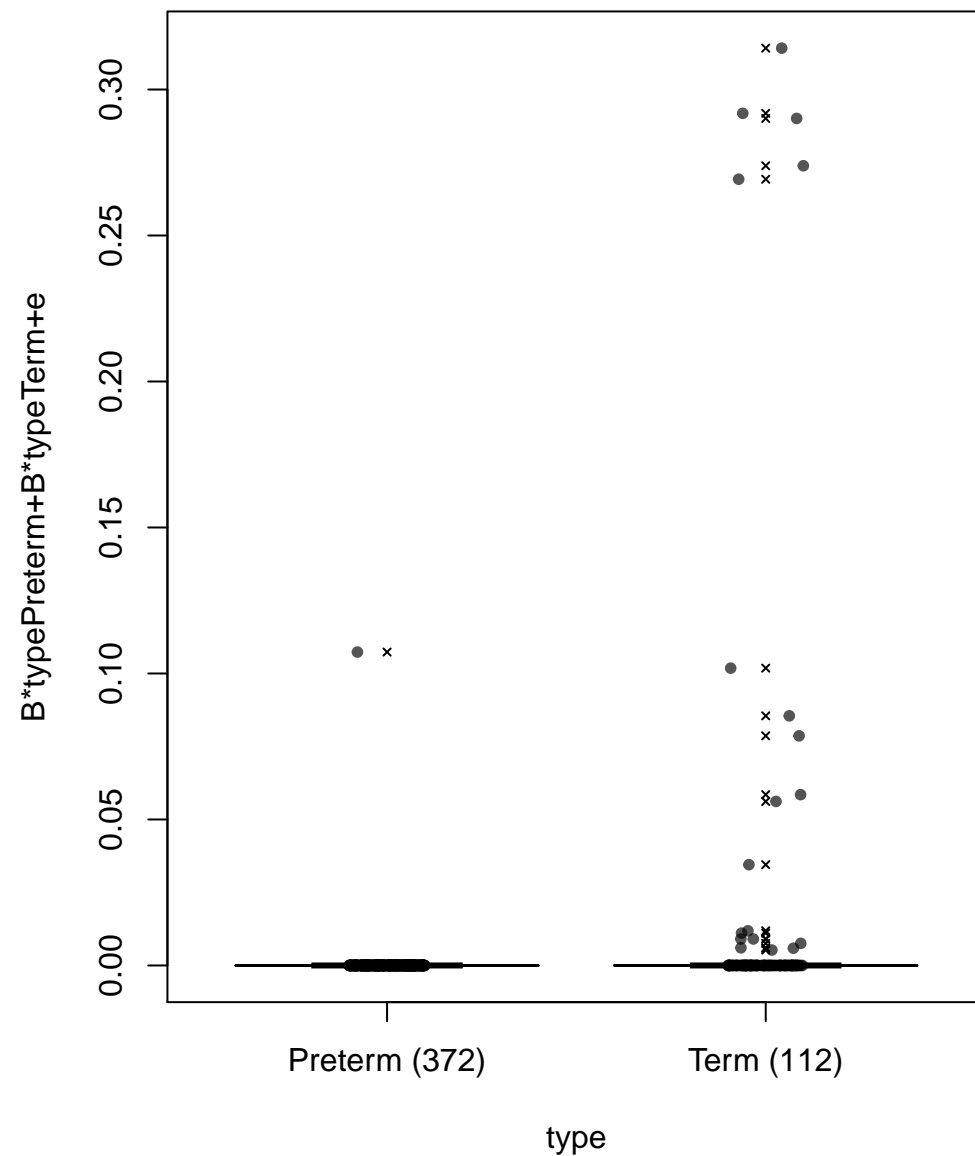

typeTerm (0.0232 sd 0.00442, p=2.26e-07, q=1.51e-06)

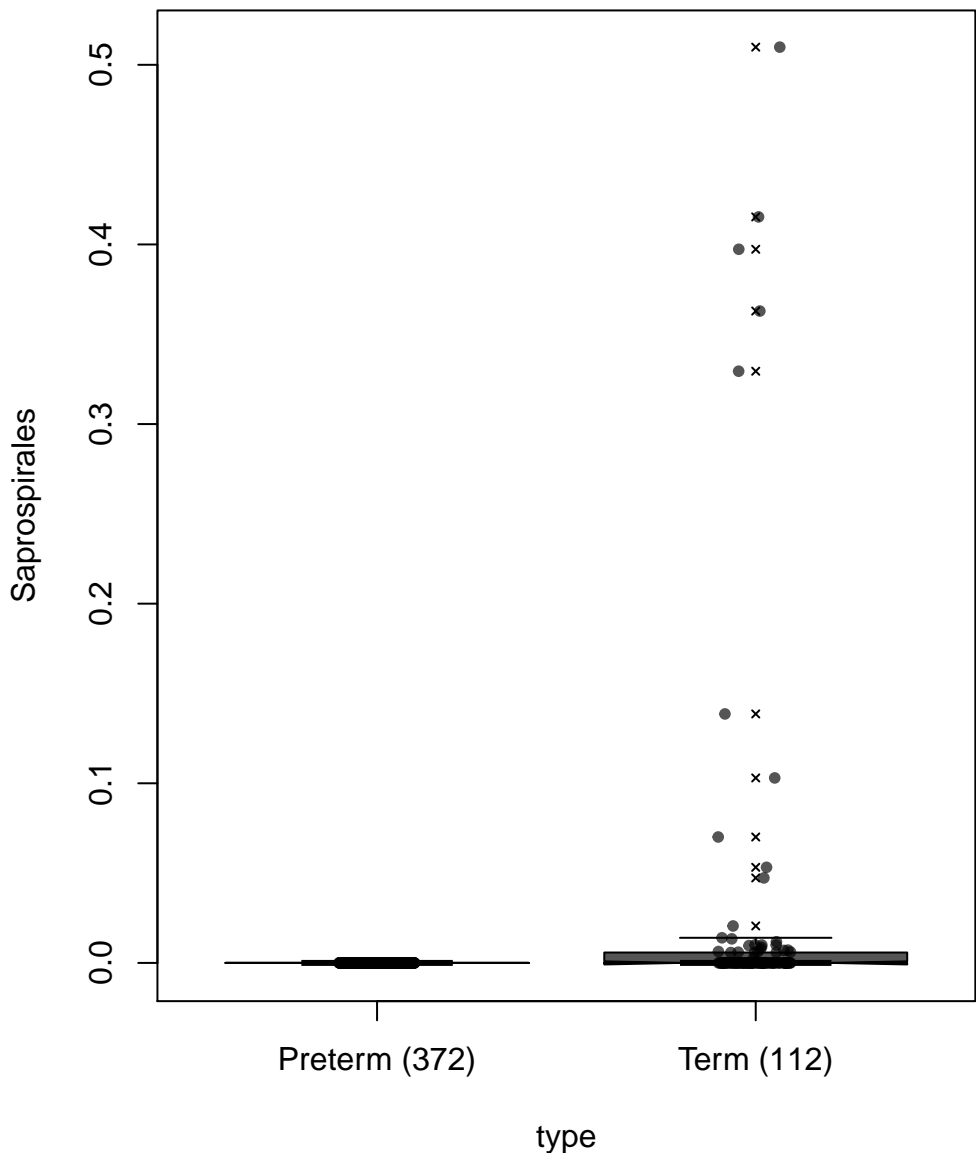

Partial Residual Plot

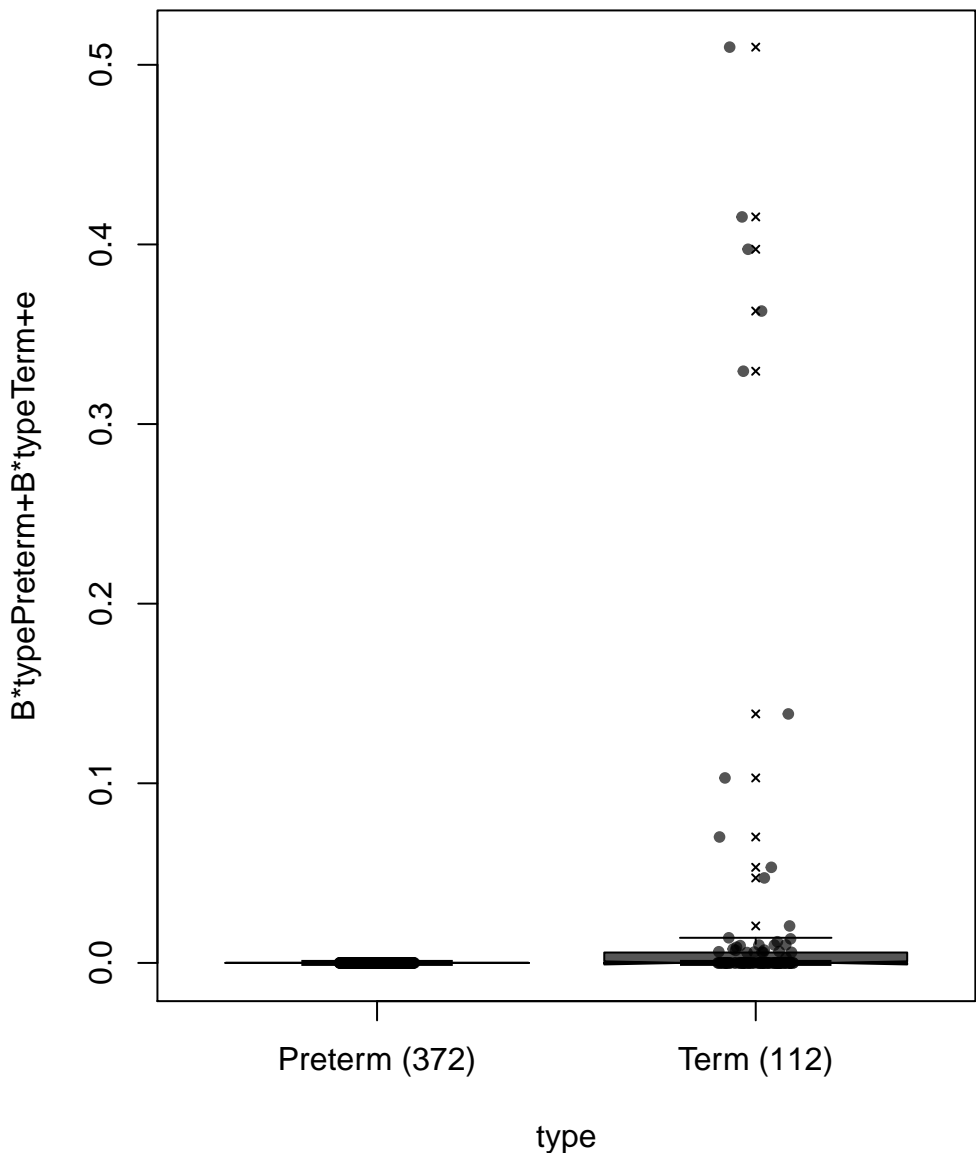

typeTerm (0.0159 sd 0.00335, p=2.97e-06, q=1.81e-05)

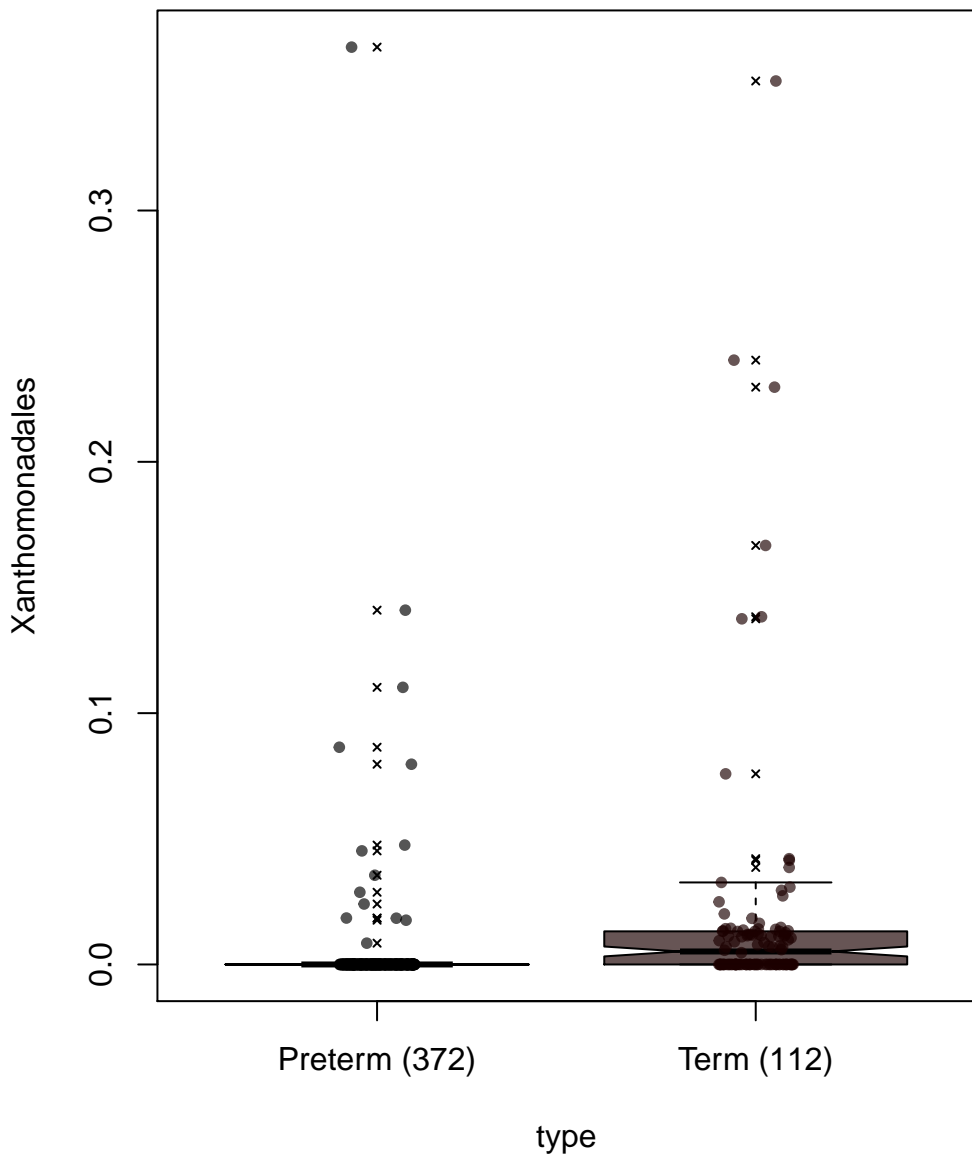

Partial Residual Plot

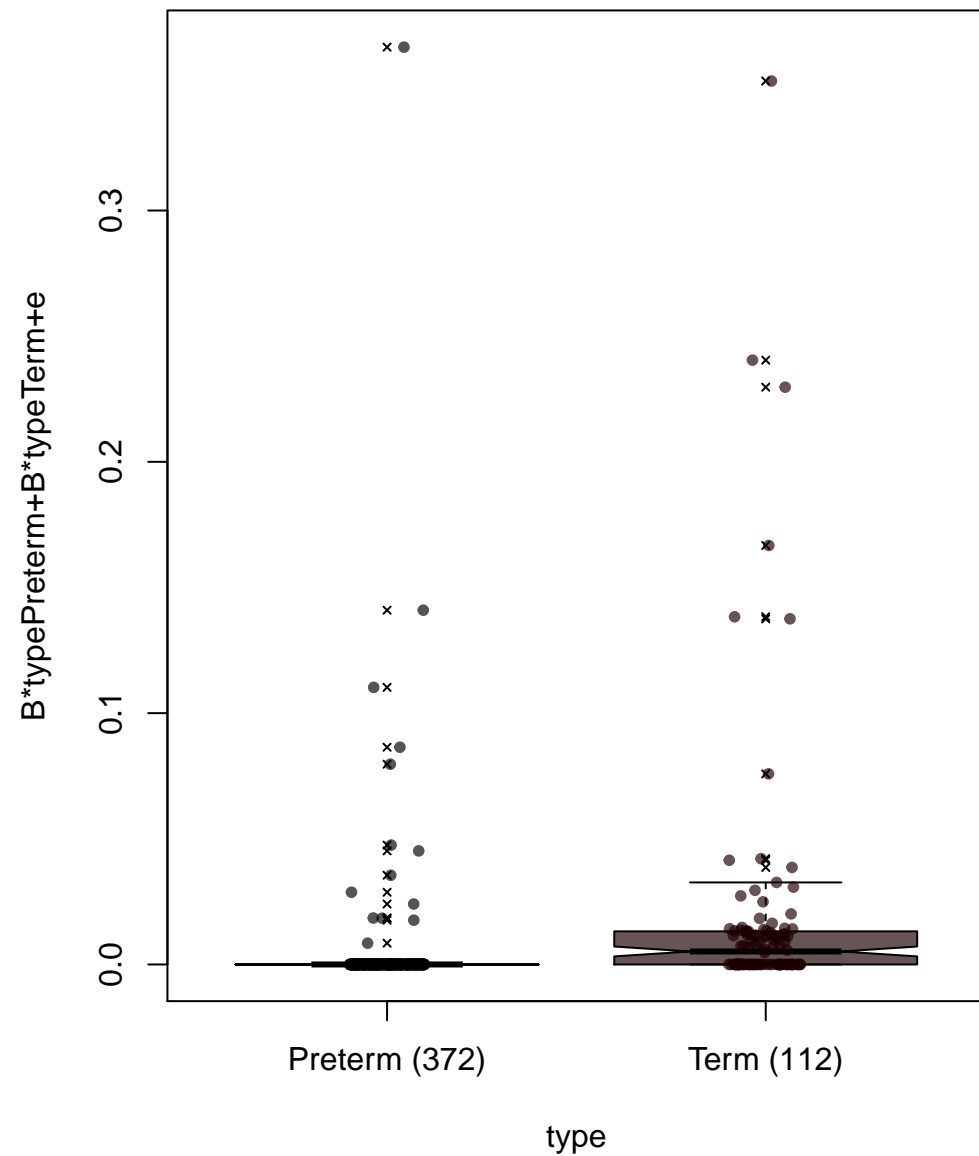

typeTerm (0.114 sd 0.0264, p=2.11e-05, q=0.000118)

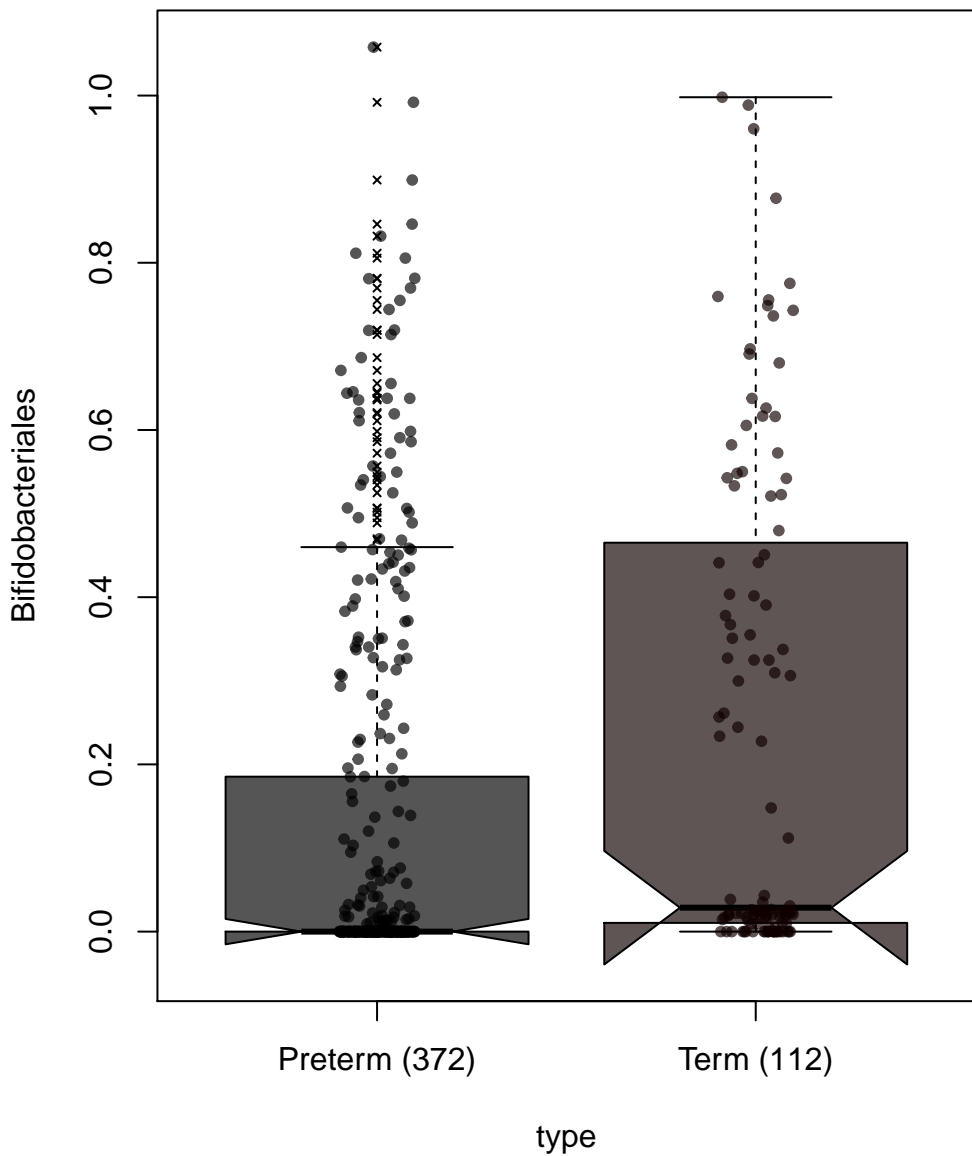

Partial Residual Plot

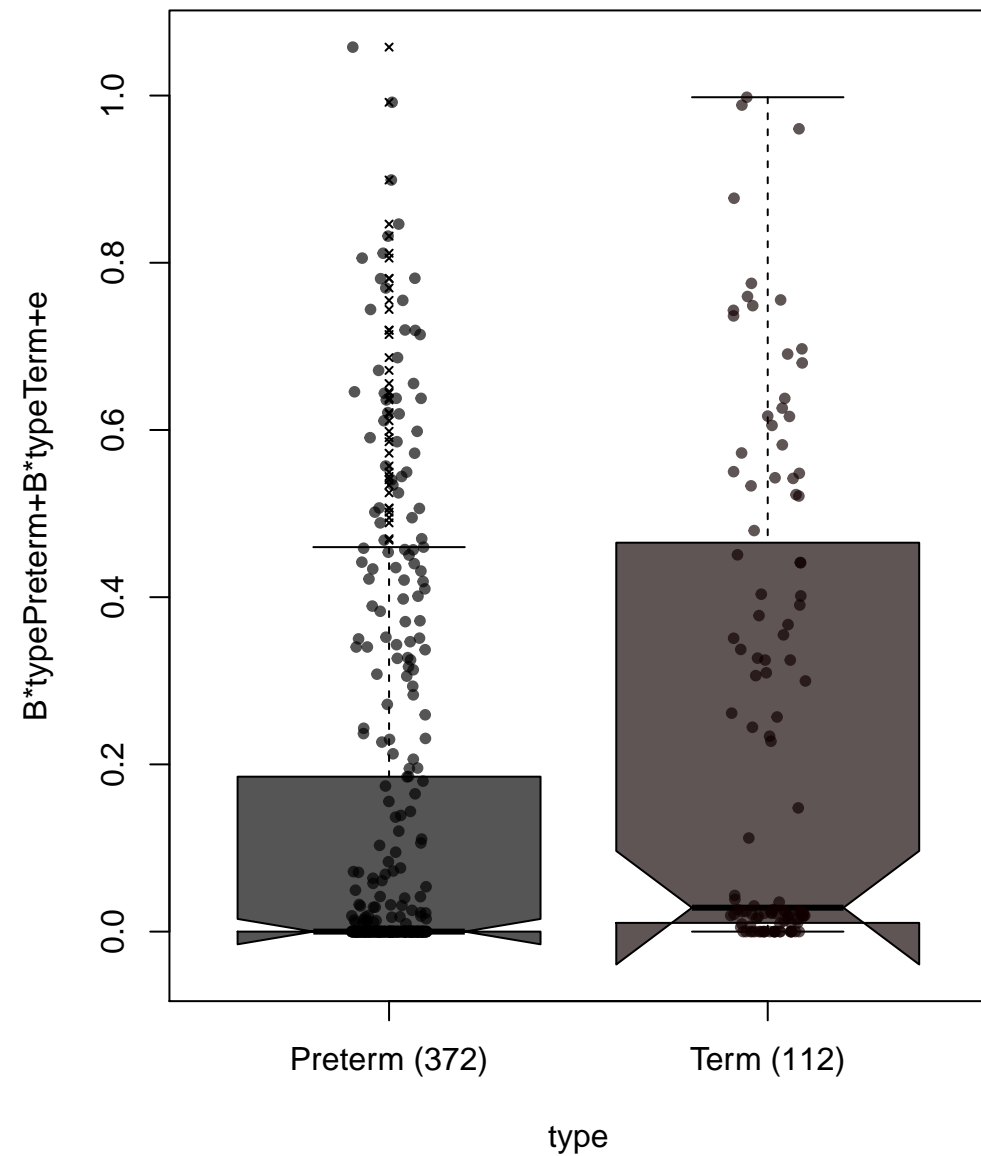

typeTerm (0.0251 sd 0.00669, p=0.000195, q=0.00101)

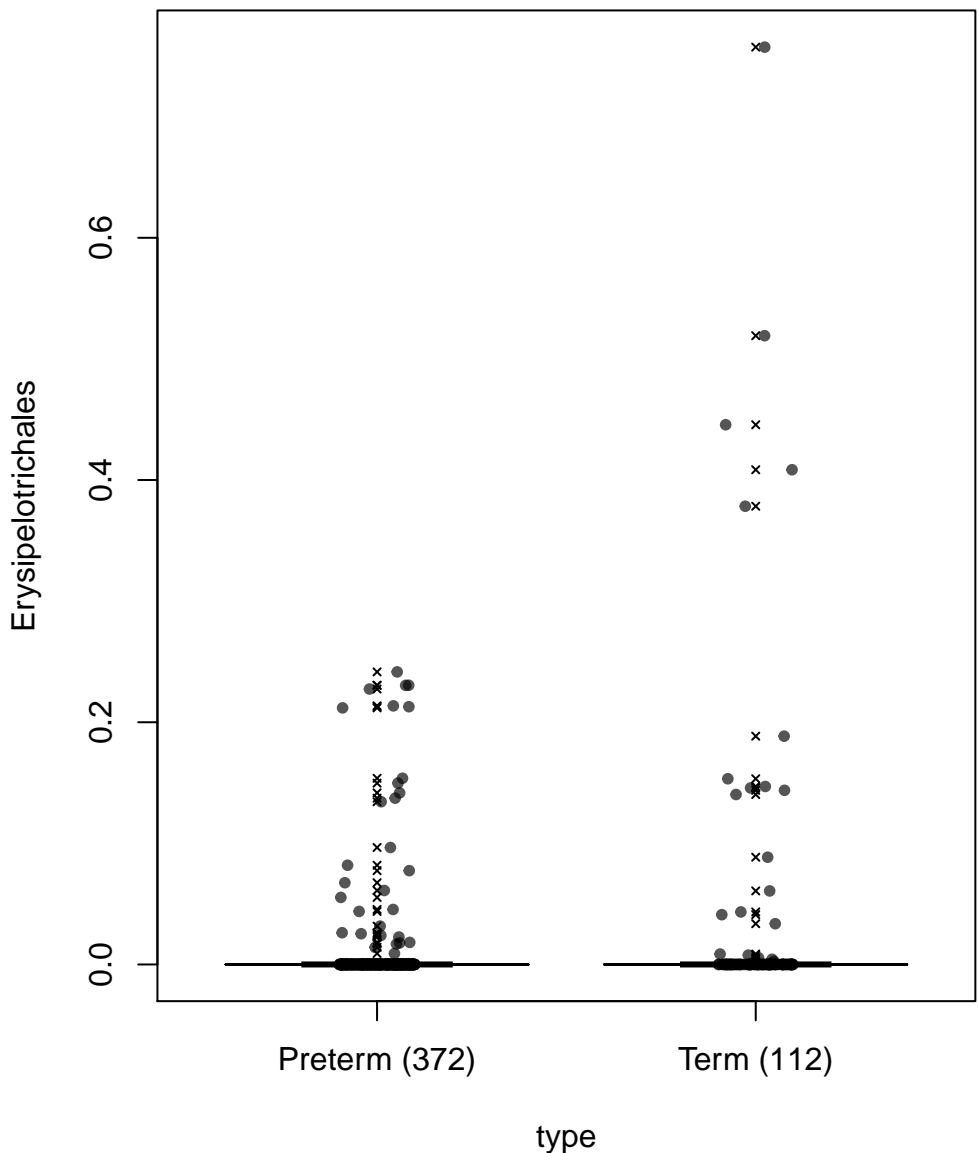

Partial Residual Plot

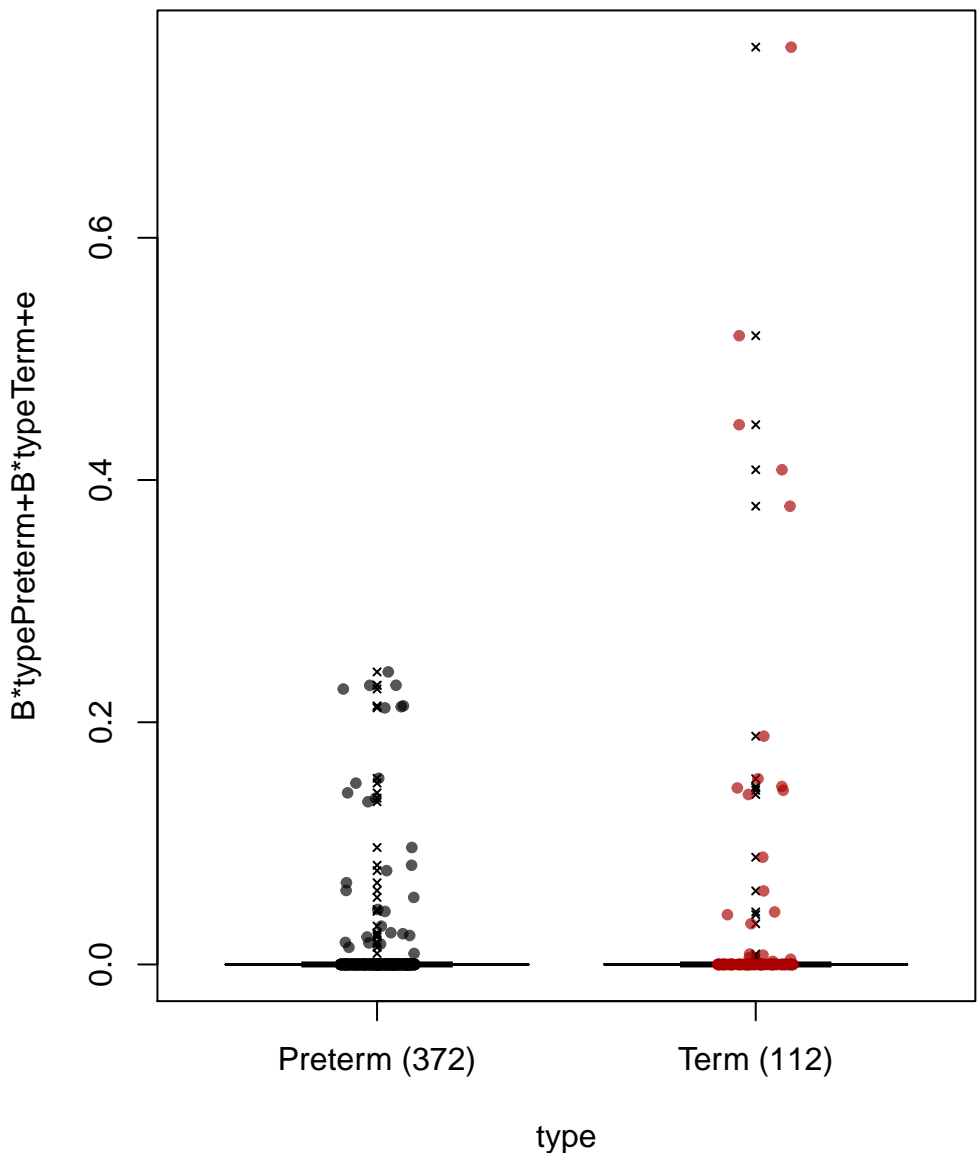

typeTerm (0.0037 sd 0.00102, p=0.000333, q=0.0016)

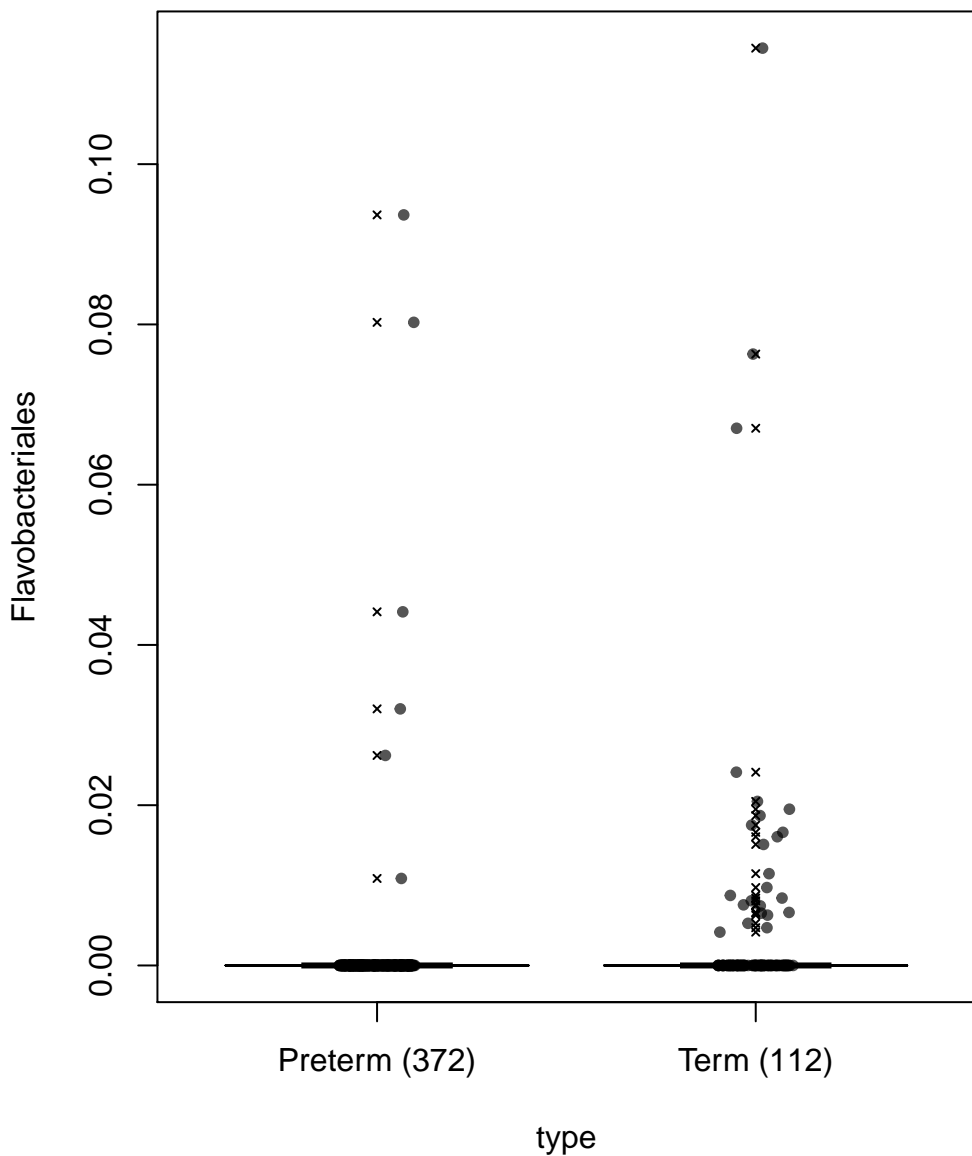

Partial Residual Plot

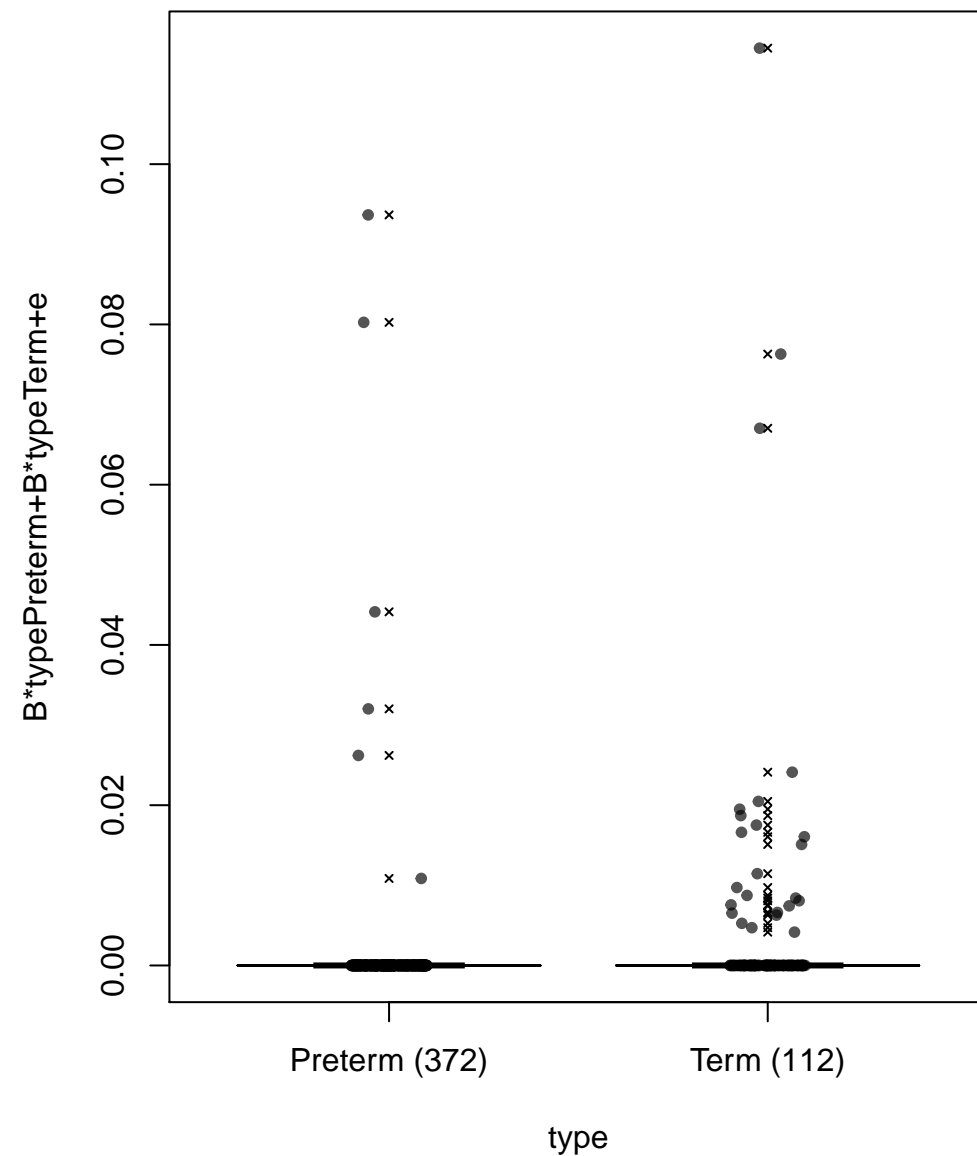

typeTerm (0.00947 sd 0.00268, p=0.000442, q=0.00197)

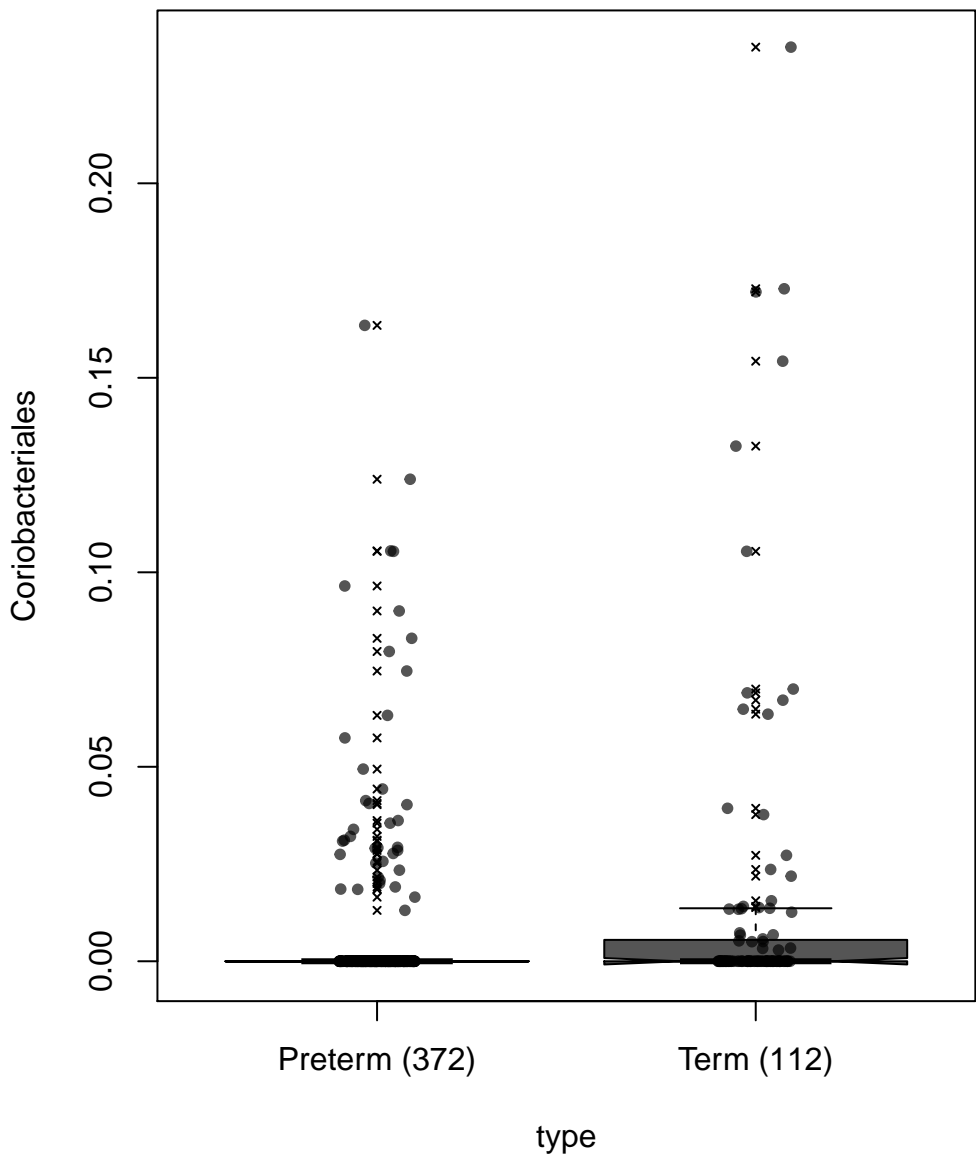

Partial Residual Plot

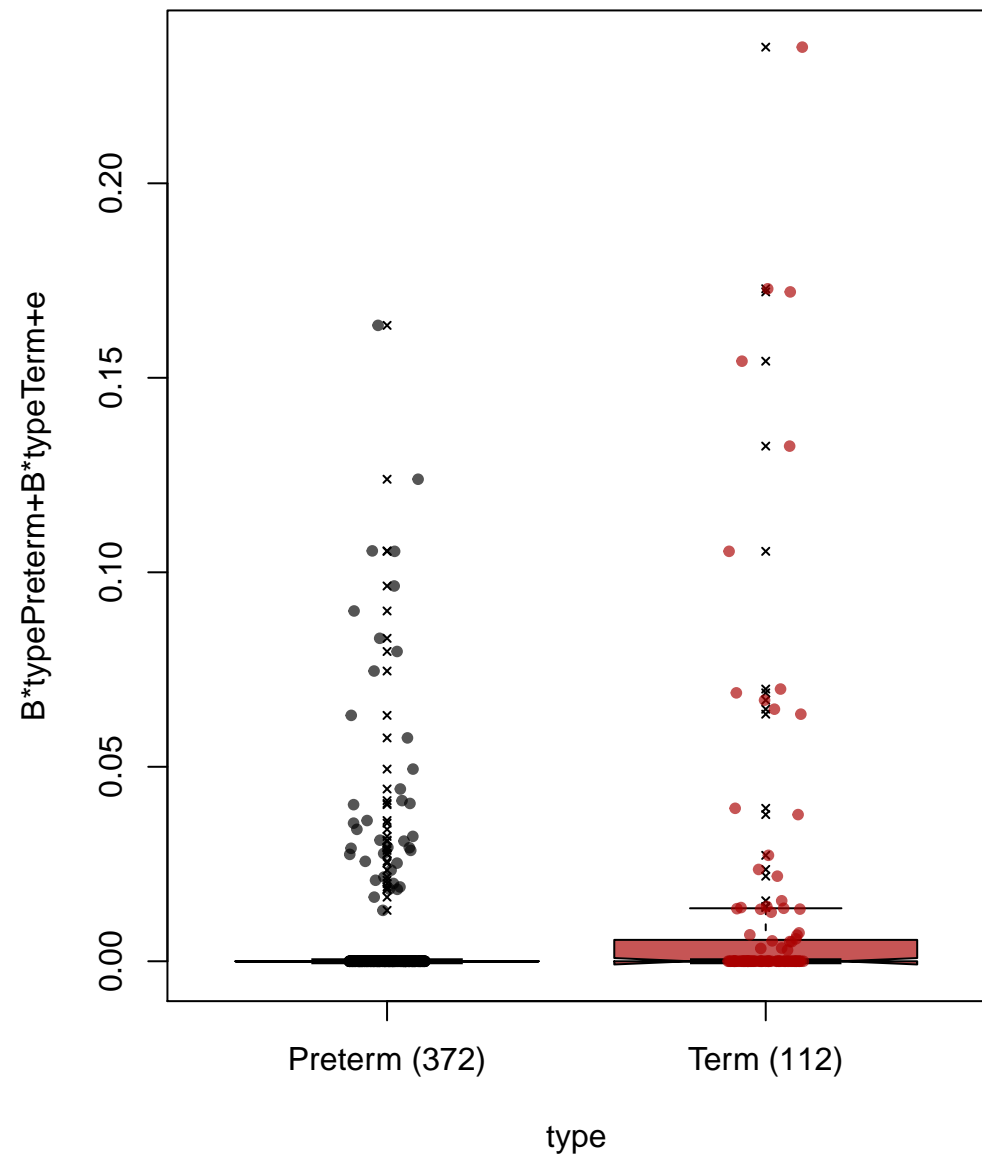



typeTerm (0.00169 sd 0.000504, p=0.00085, q=0.00356)

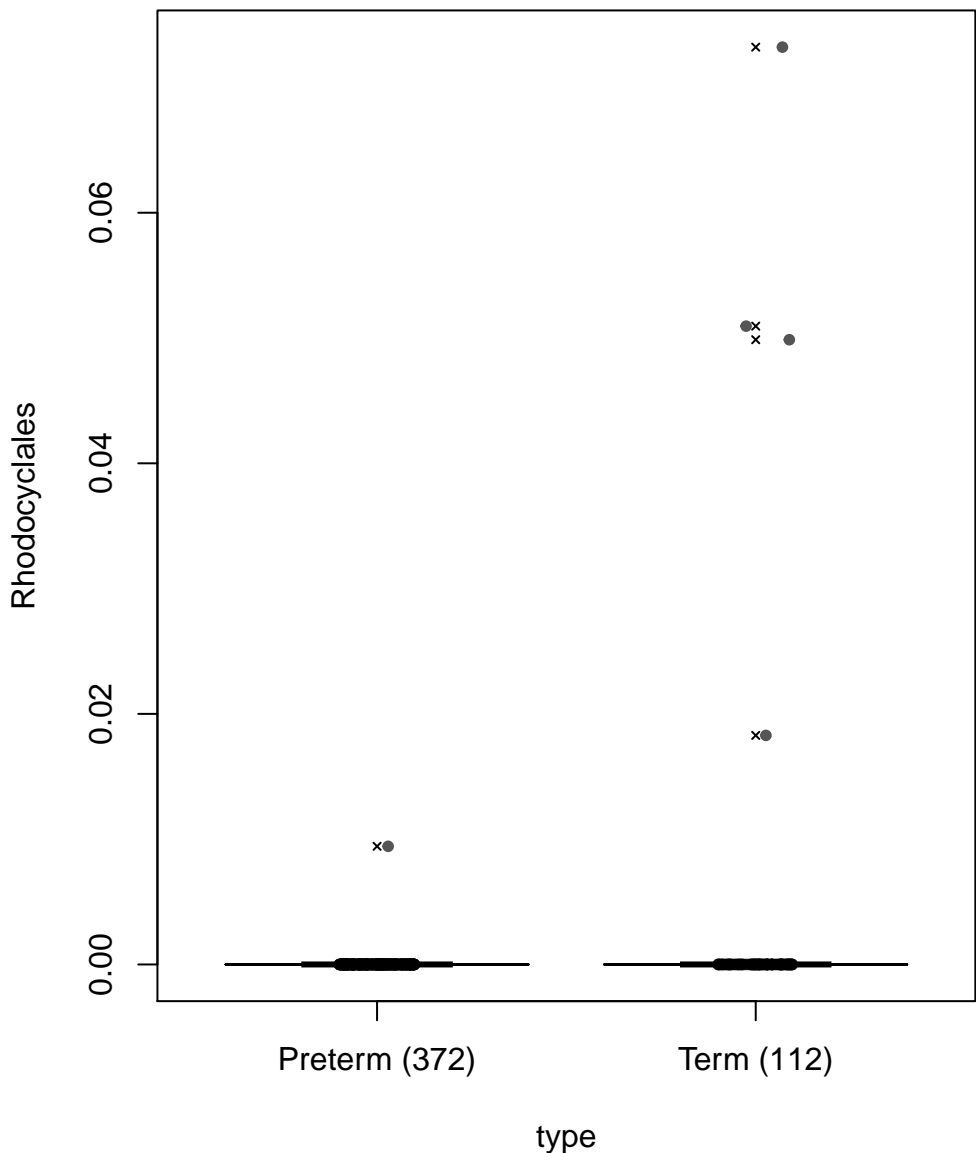

Partial Residual Plot

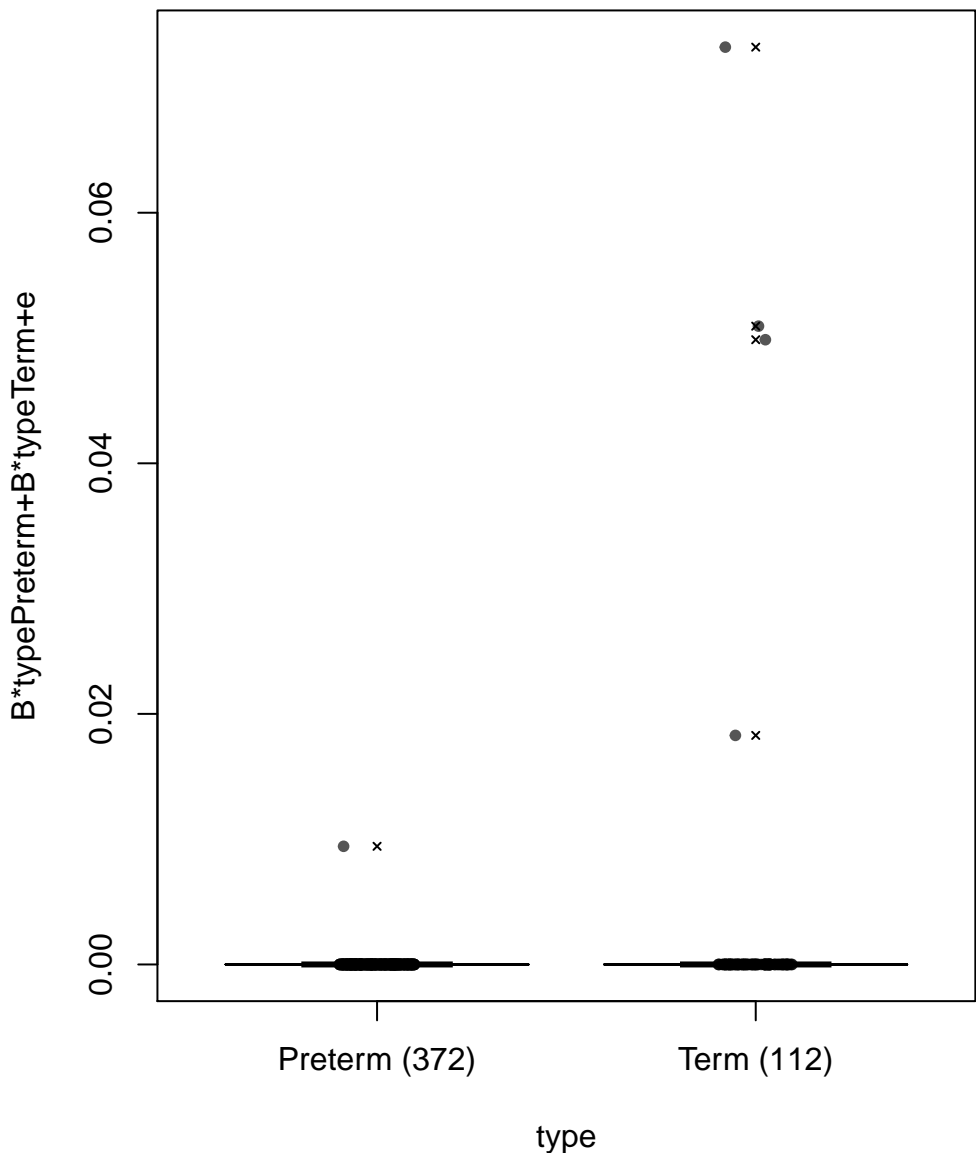

typeTerm (0.00874 sd 0.00263, p=0.000948, q=0.00374)

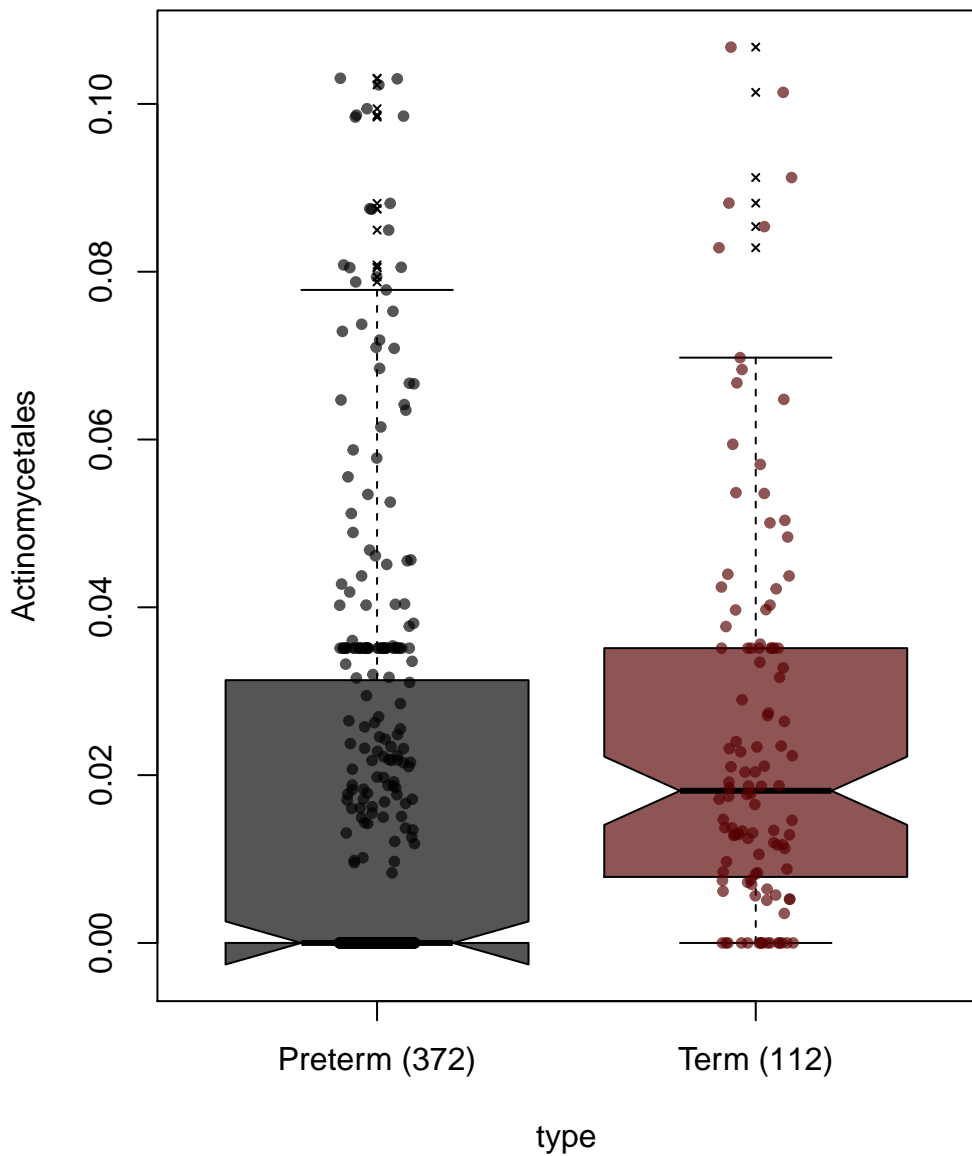

Partial Residual Plot

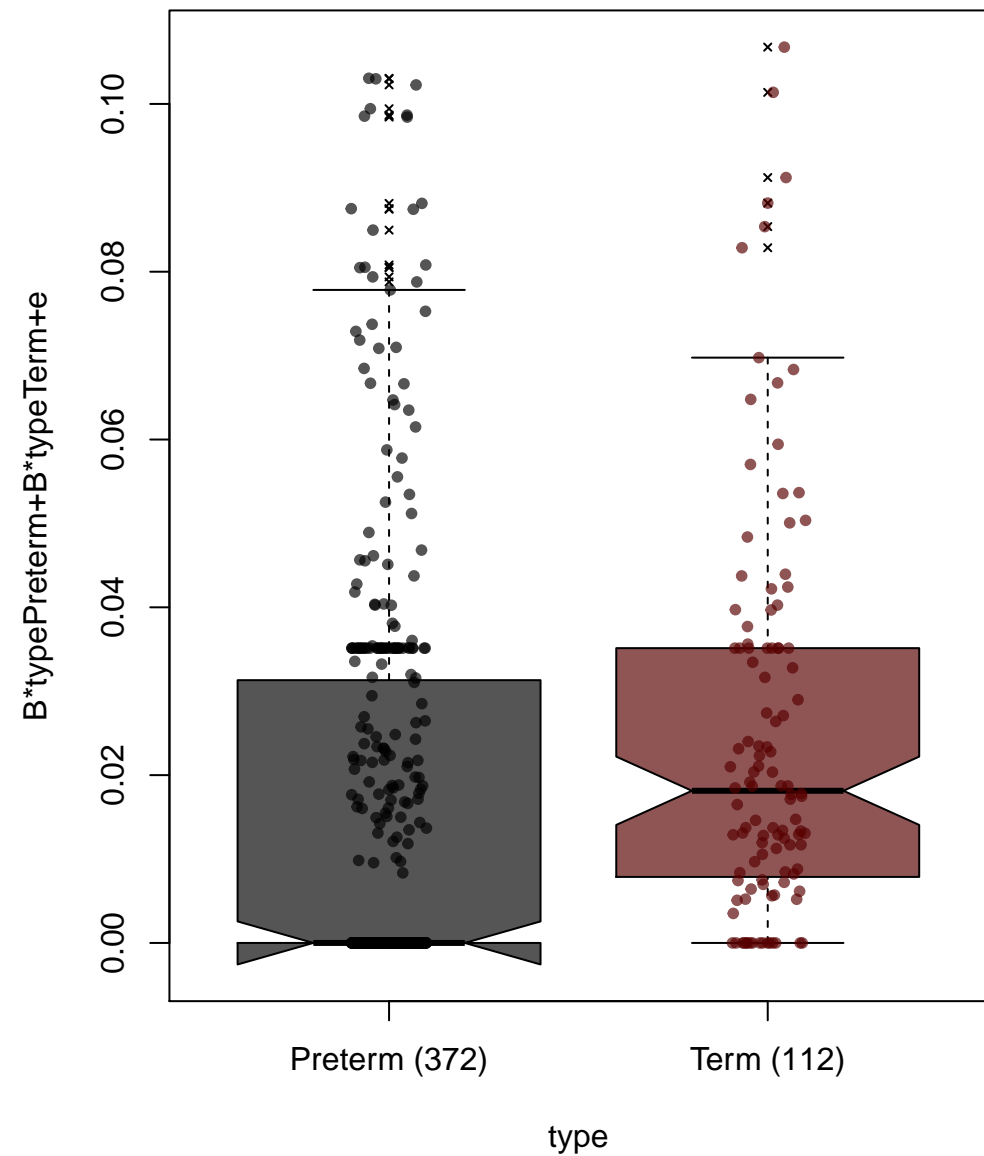

typeTerm (0.0102 sd 0.0031, p=0.00103, q=0.00384)

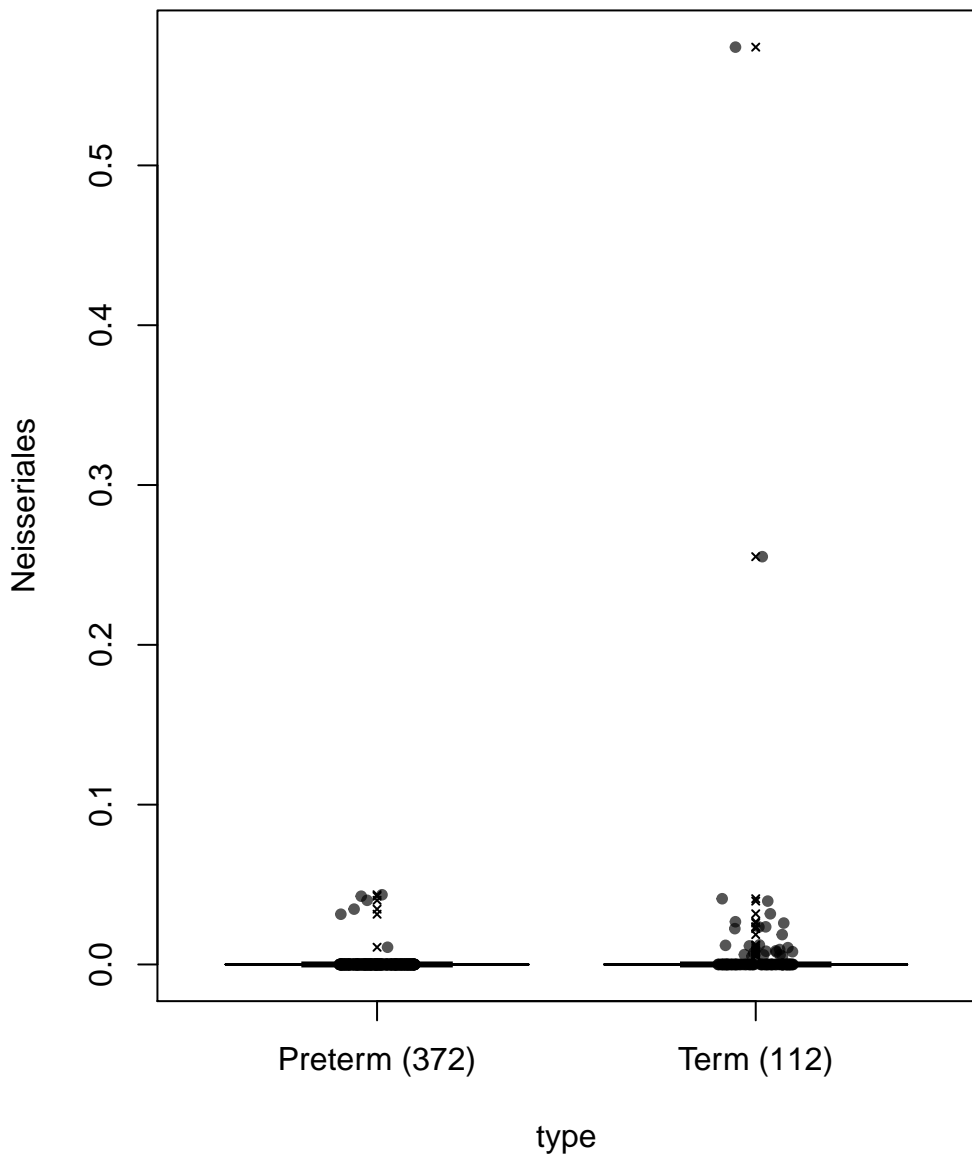

Partial Residual Plot

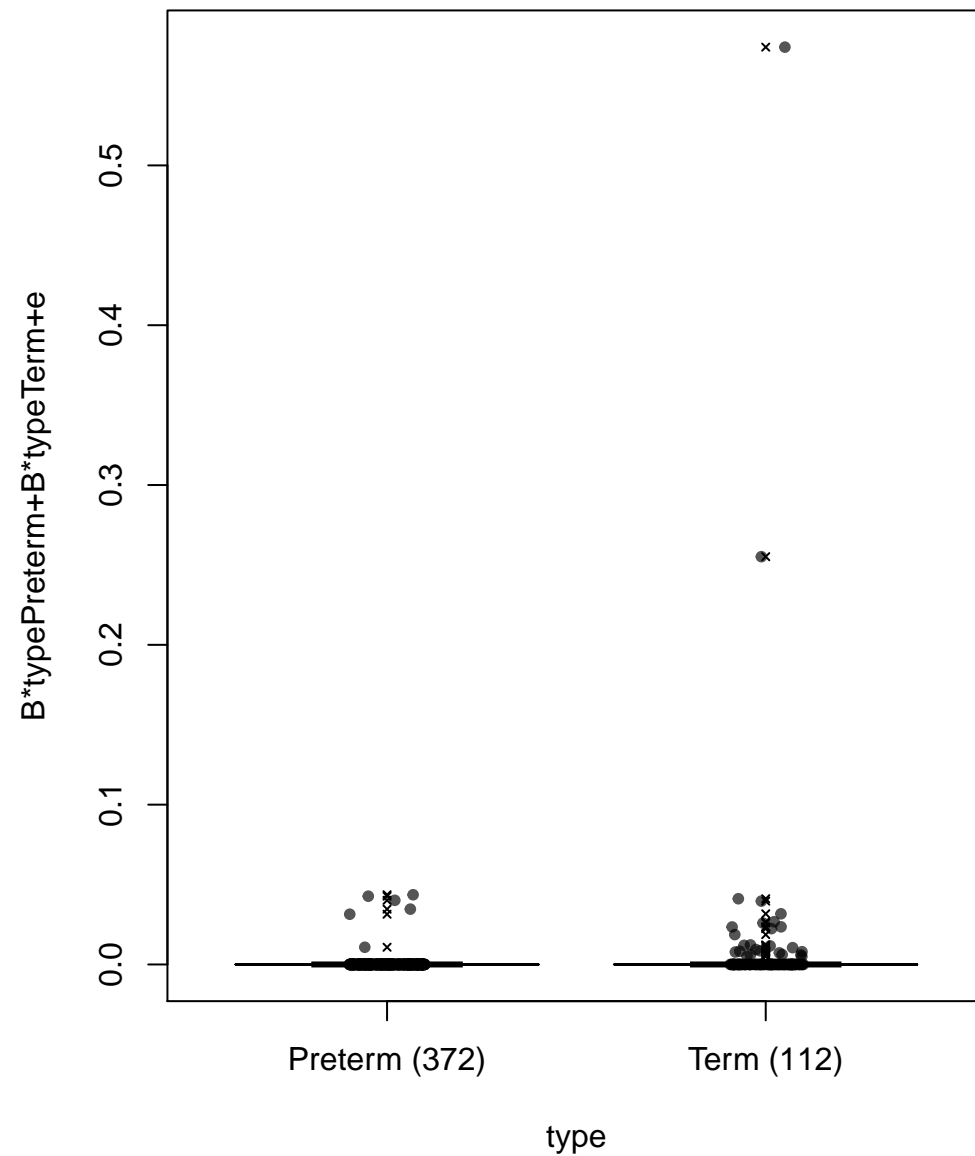

**typeTerm (0.0007 sd 0.000219, p=0.00147, q=0.00519)**

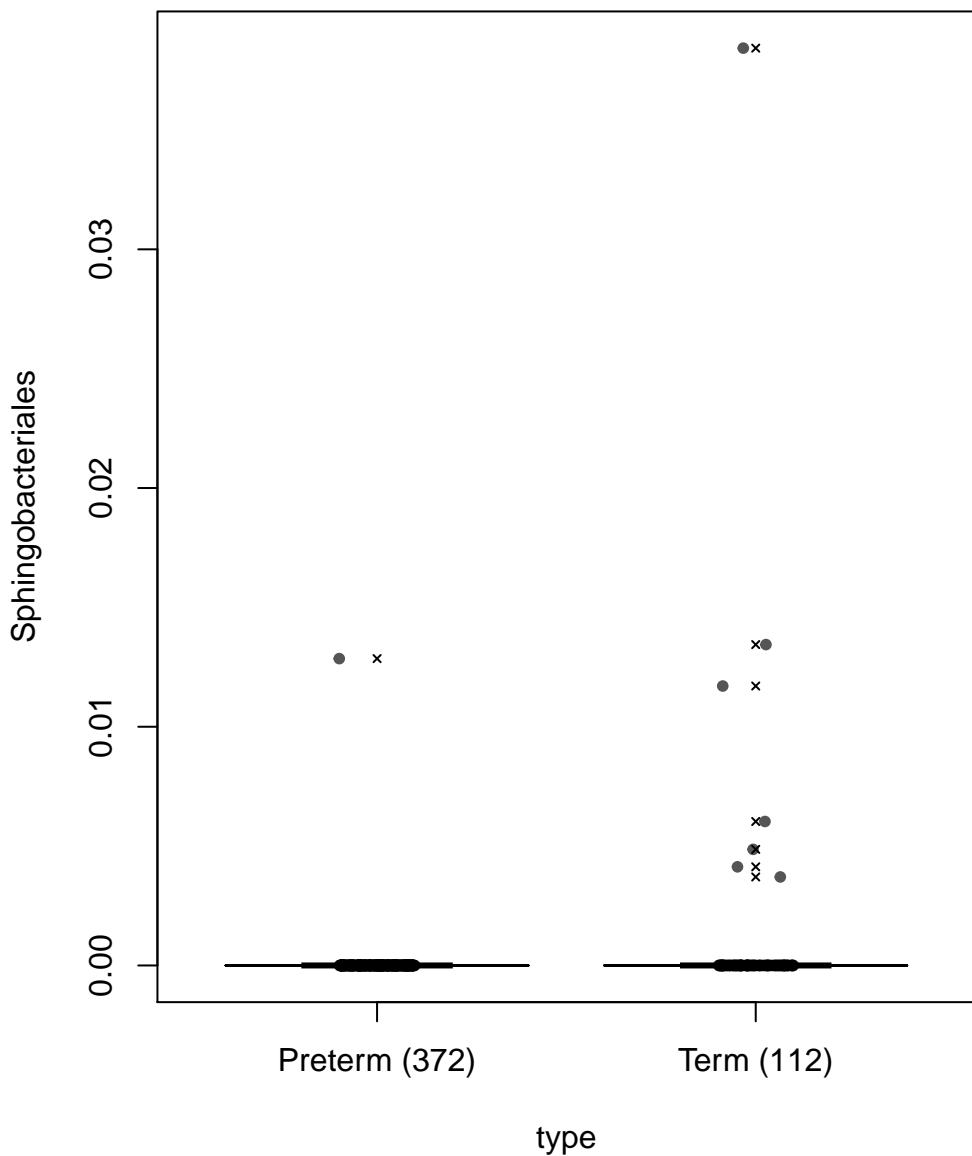

### Partial Residual Plot

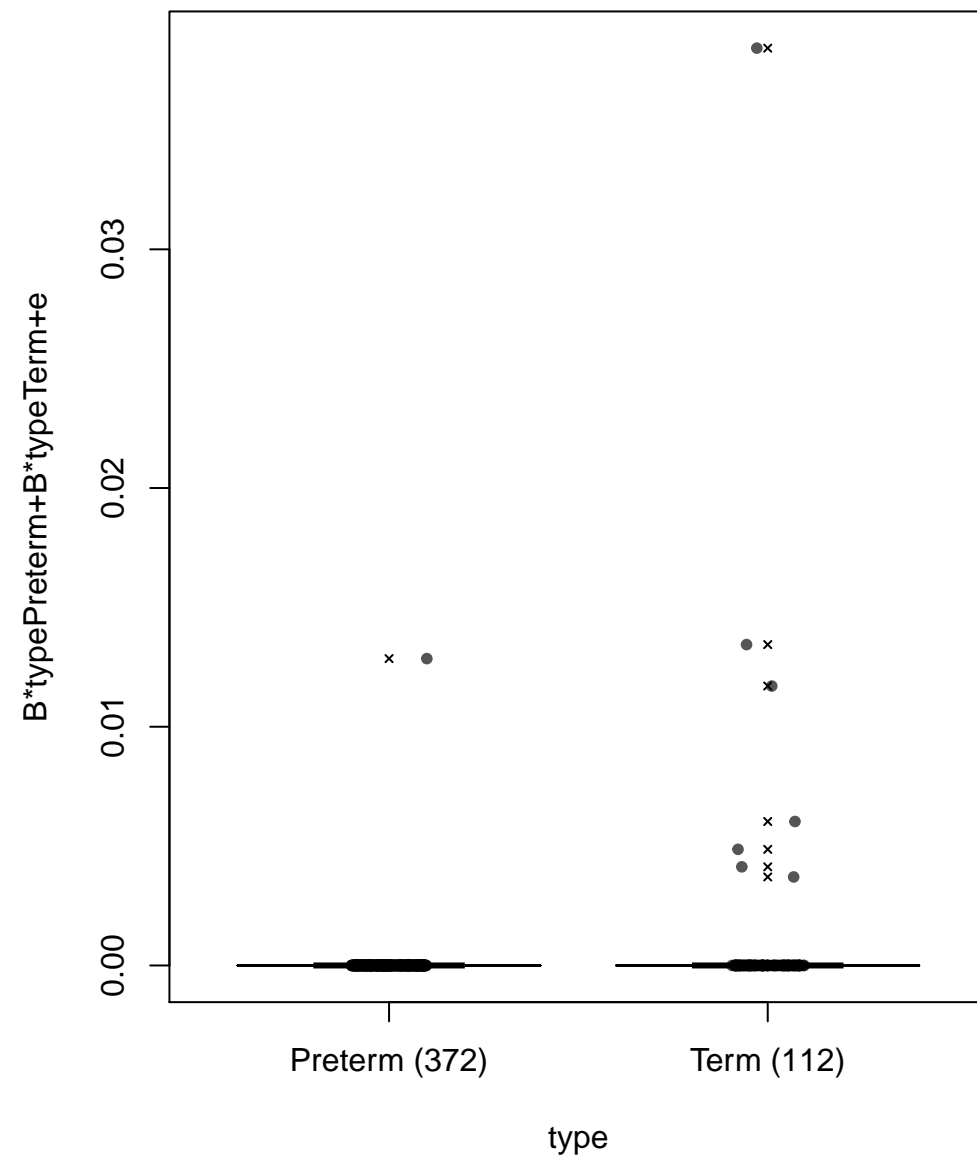

**typeTerm (0.00777 sd 0.00246, p=0.00171, q=0.00574)**

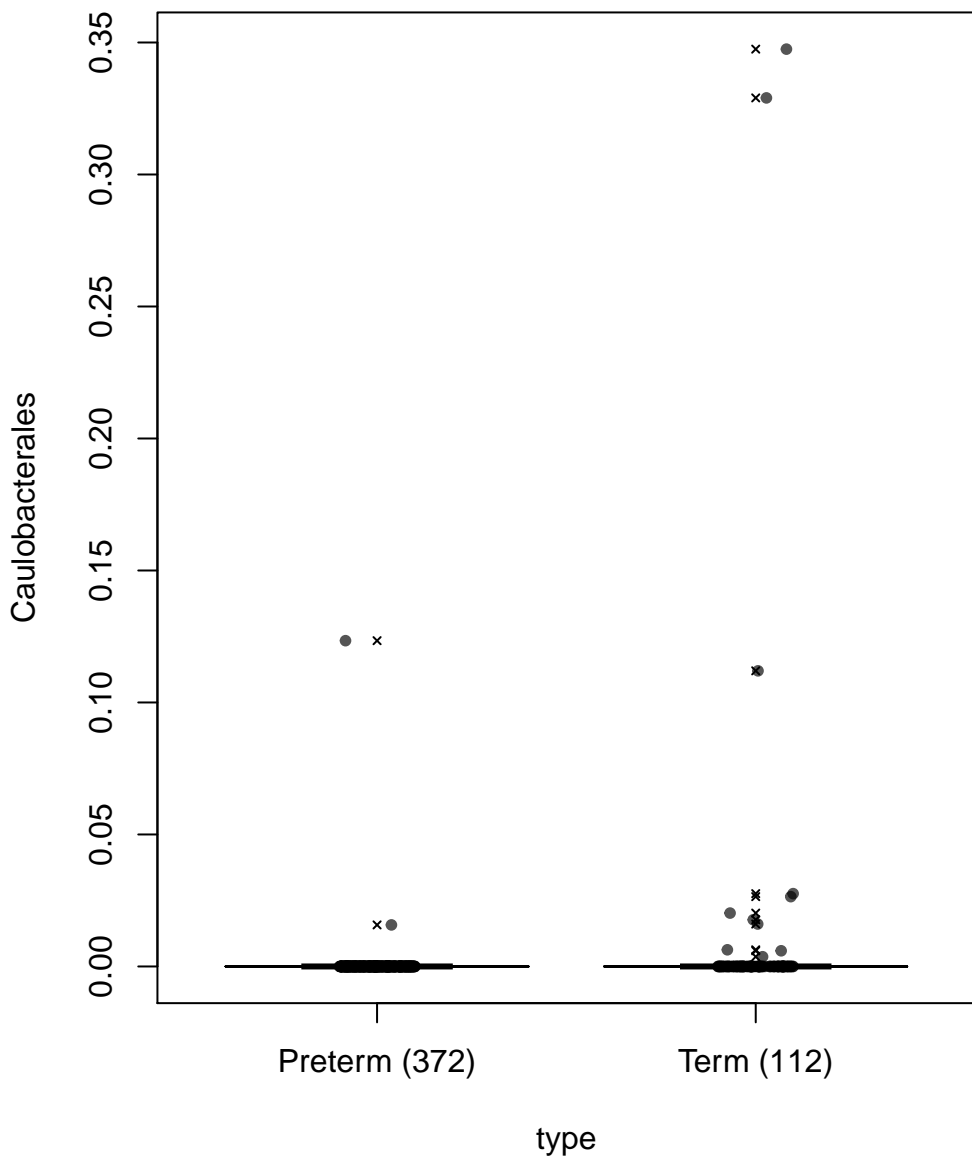

### Partial Residual Plot

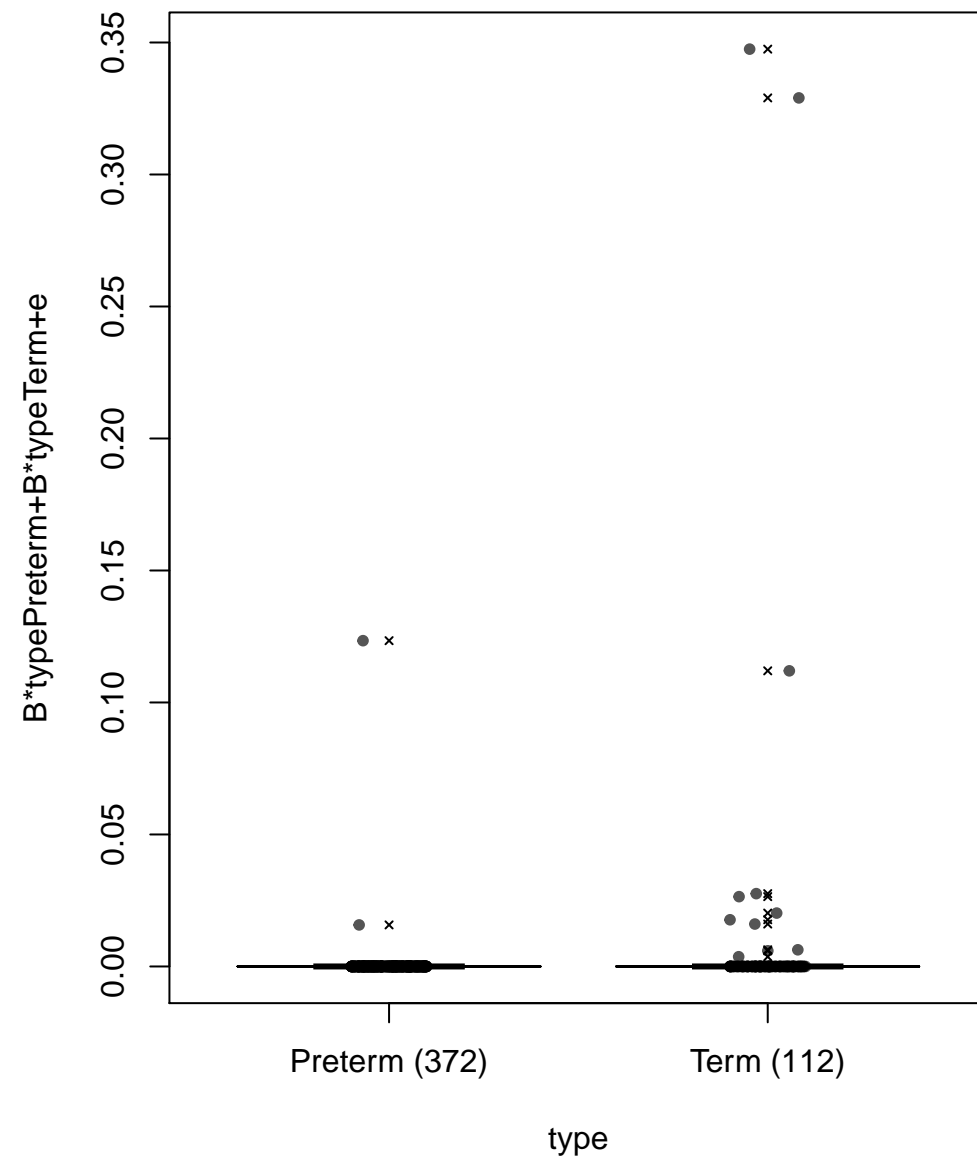

typeTerm (0.00242 sd 0.000786, p=0.00221, q=0.00705)

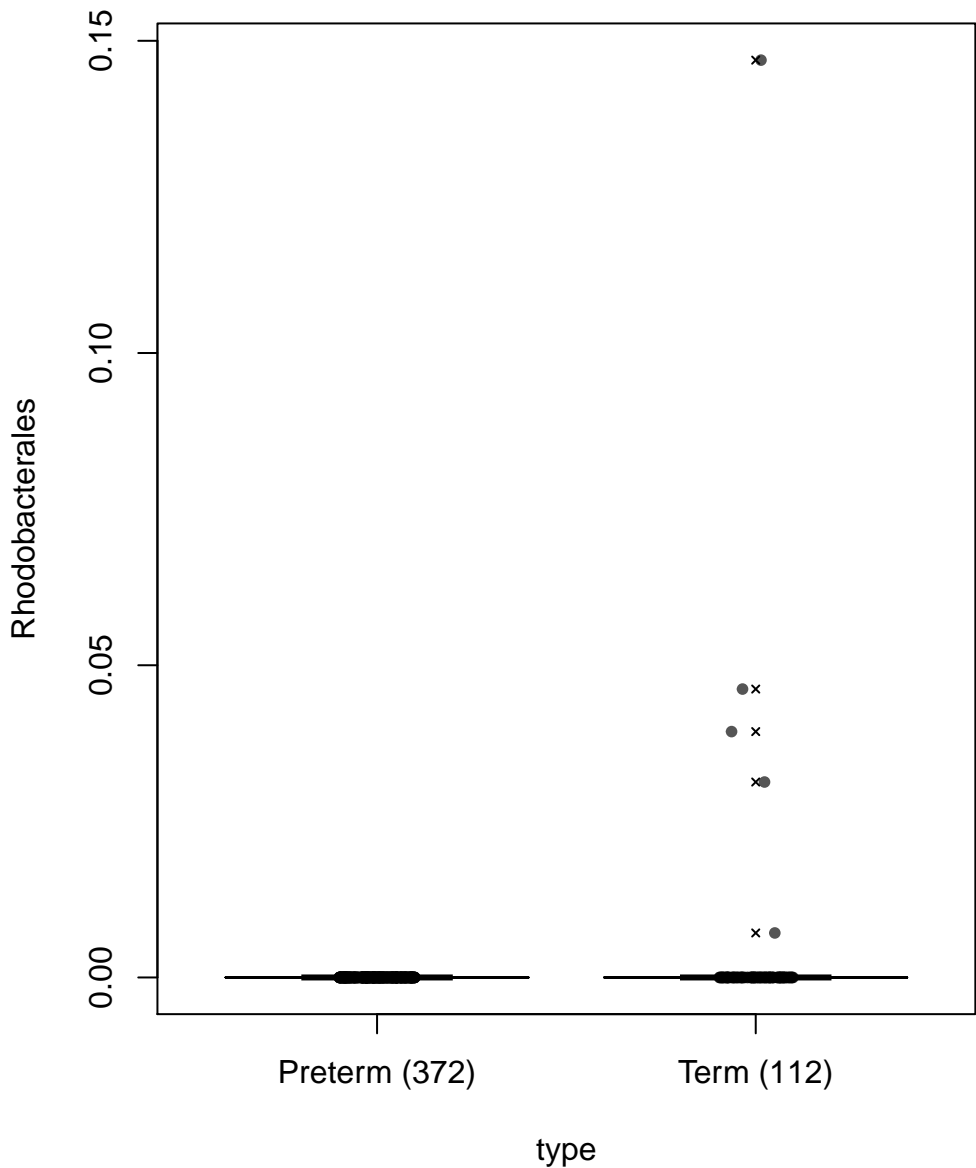

Partial Residual Plot

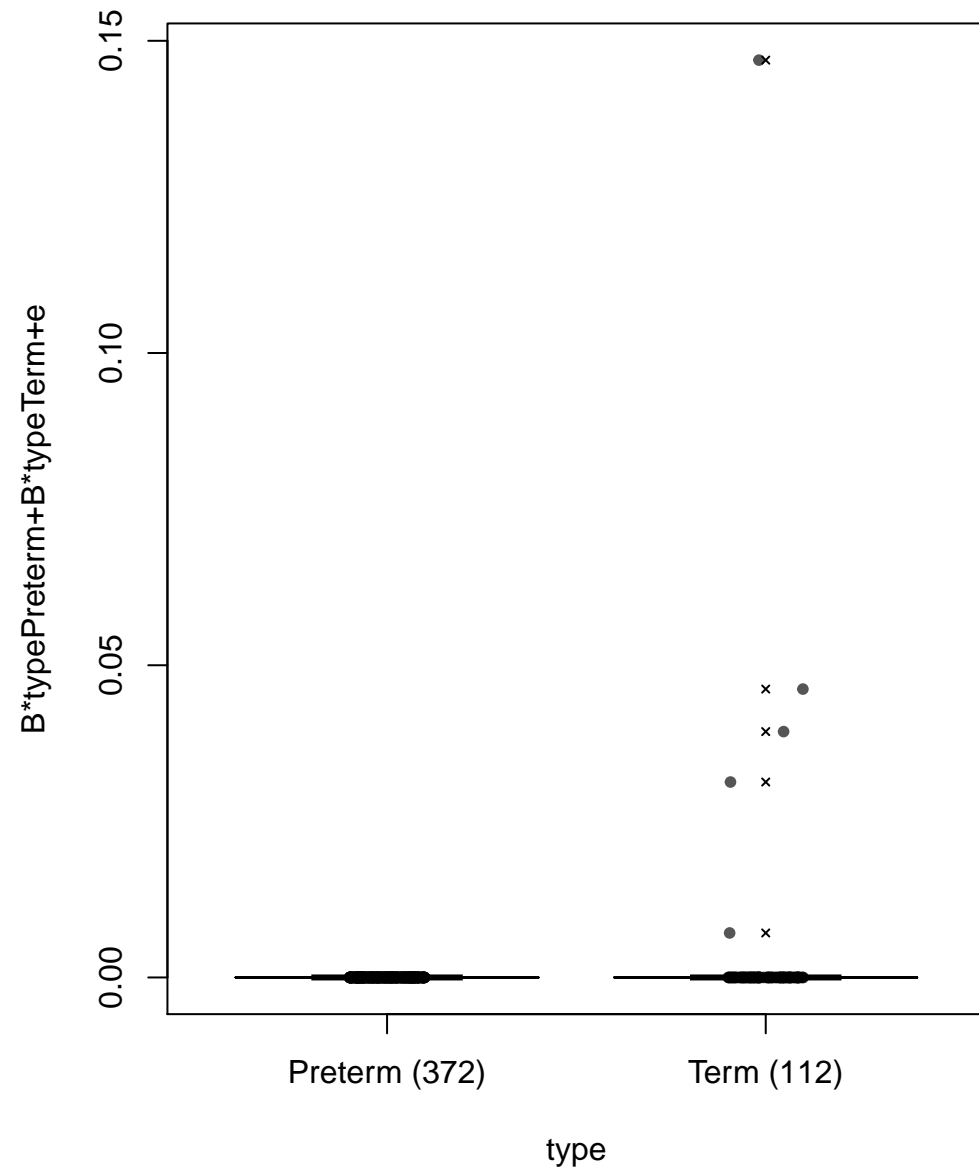

typeTerm (0.00398 sd 0.0013, p=0.00232, q=0.00707)

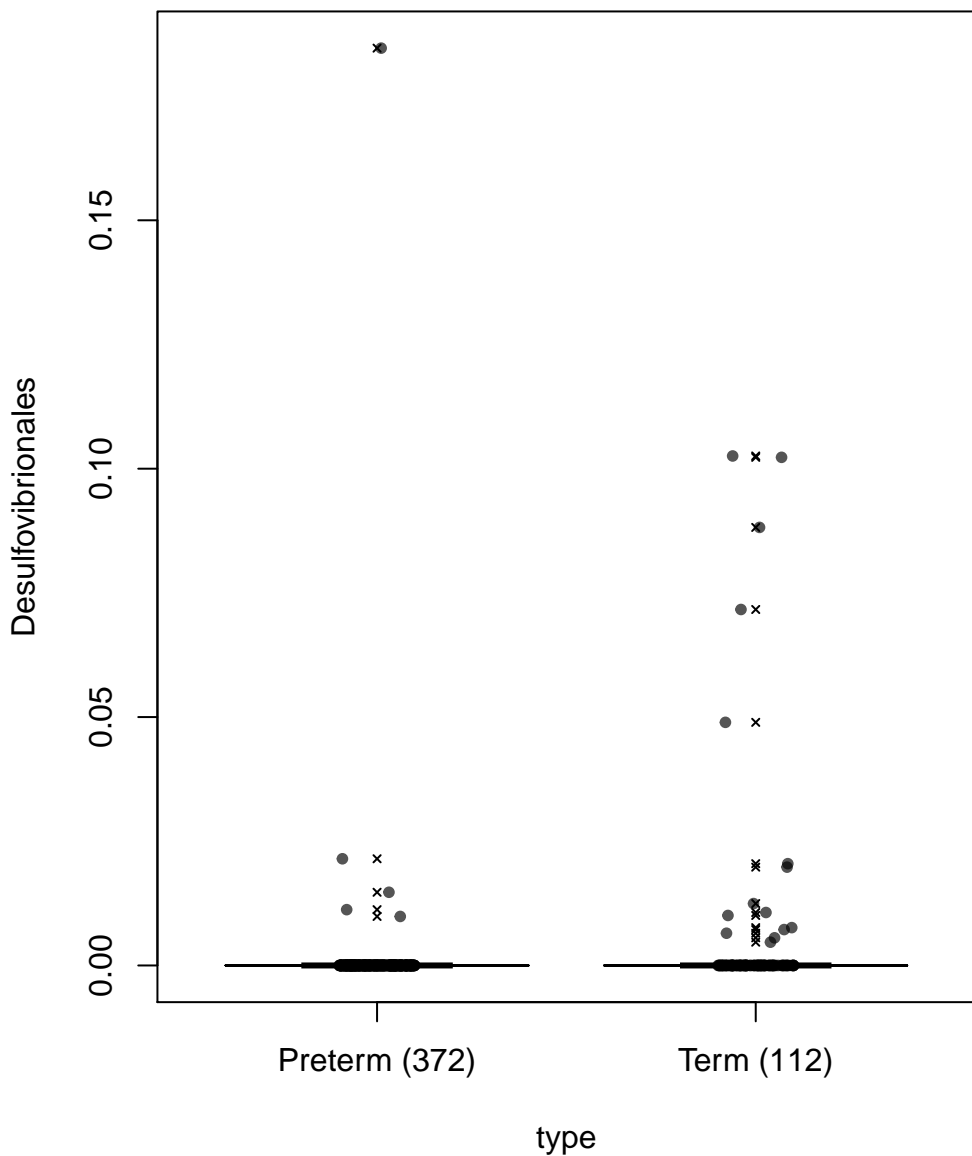

Partial Residual Plot

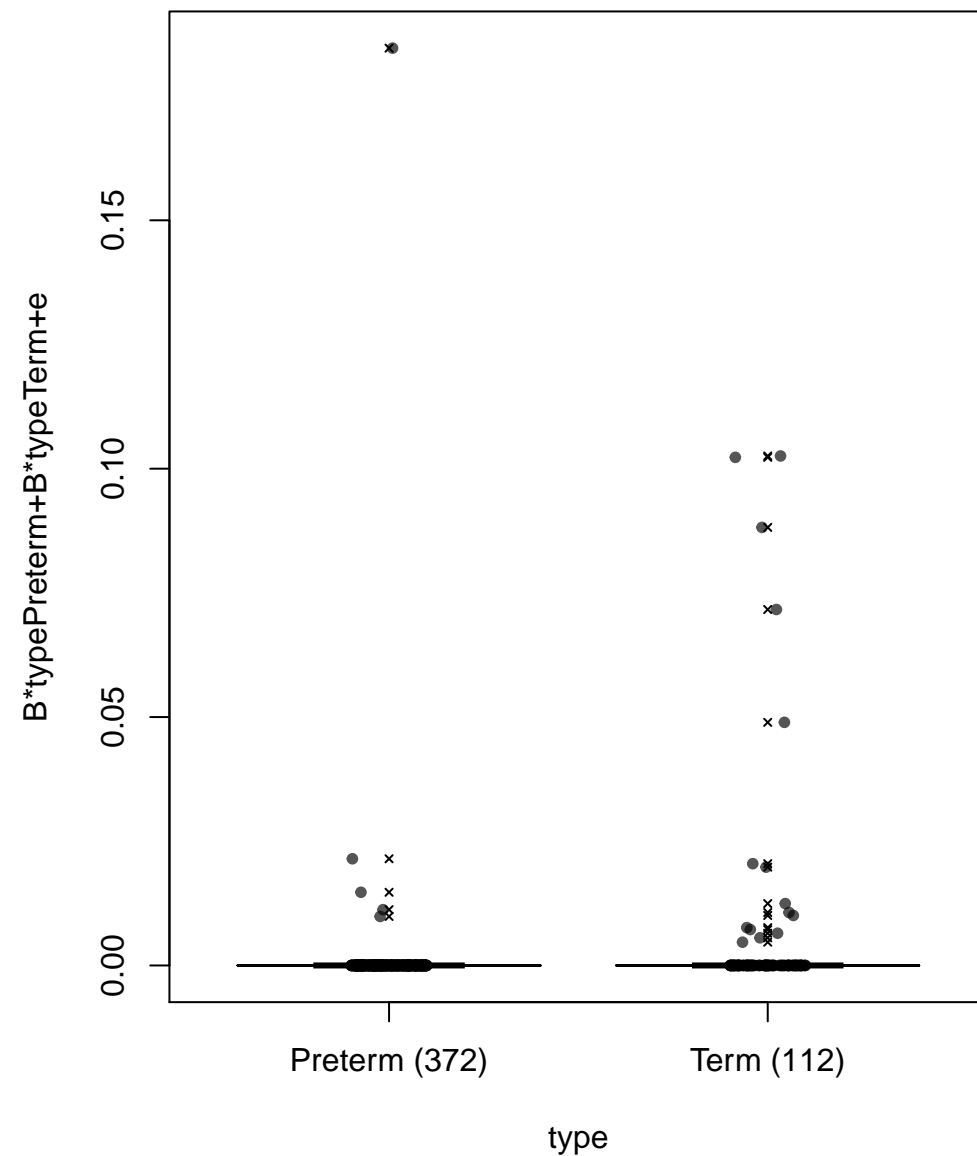

**typeTerm (0.00143 sd 0.000511, p=0.00533, q=0.0155)**

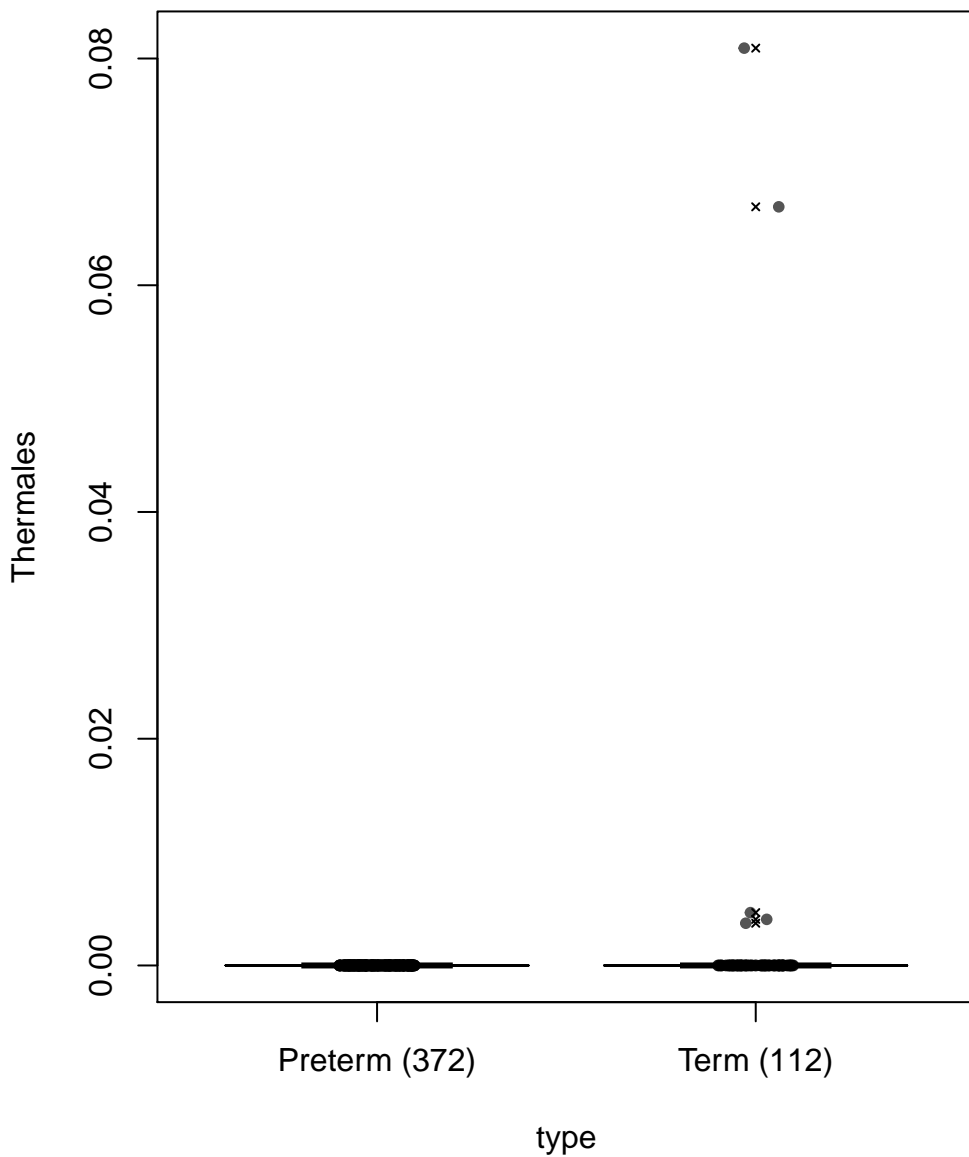

### Partial Residual Plot

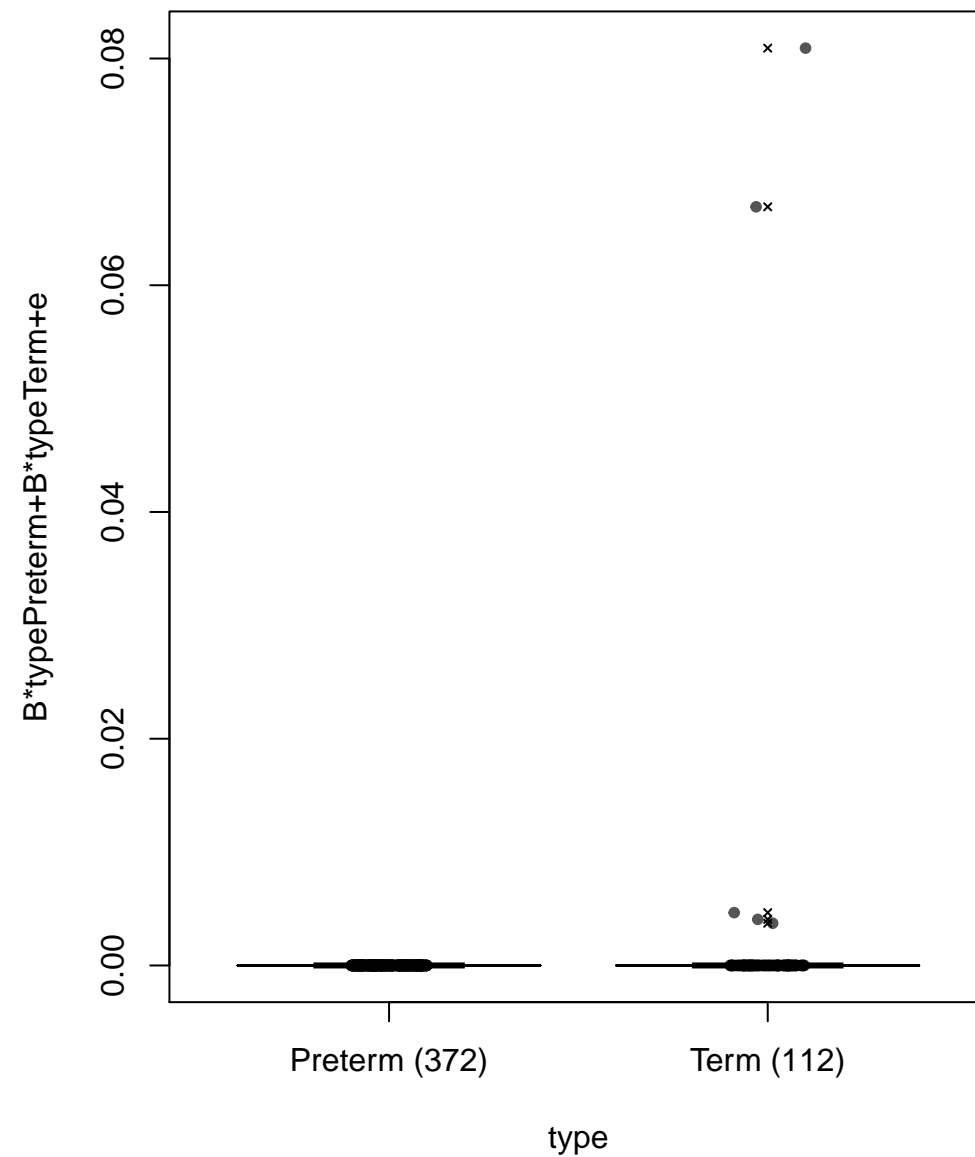



typeTerm (0.00139 sd 0.000511, p=0.00689, q=0.0192)

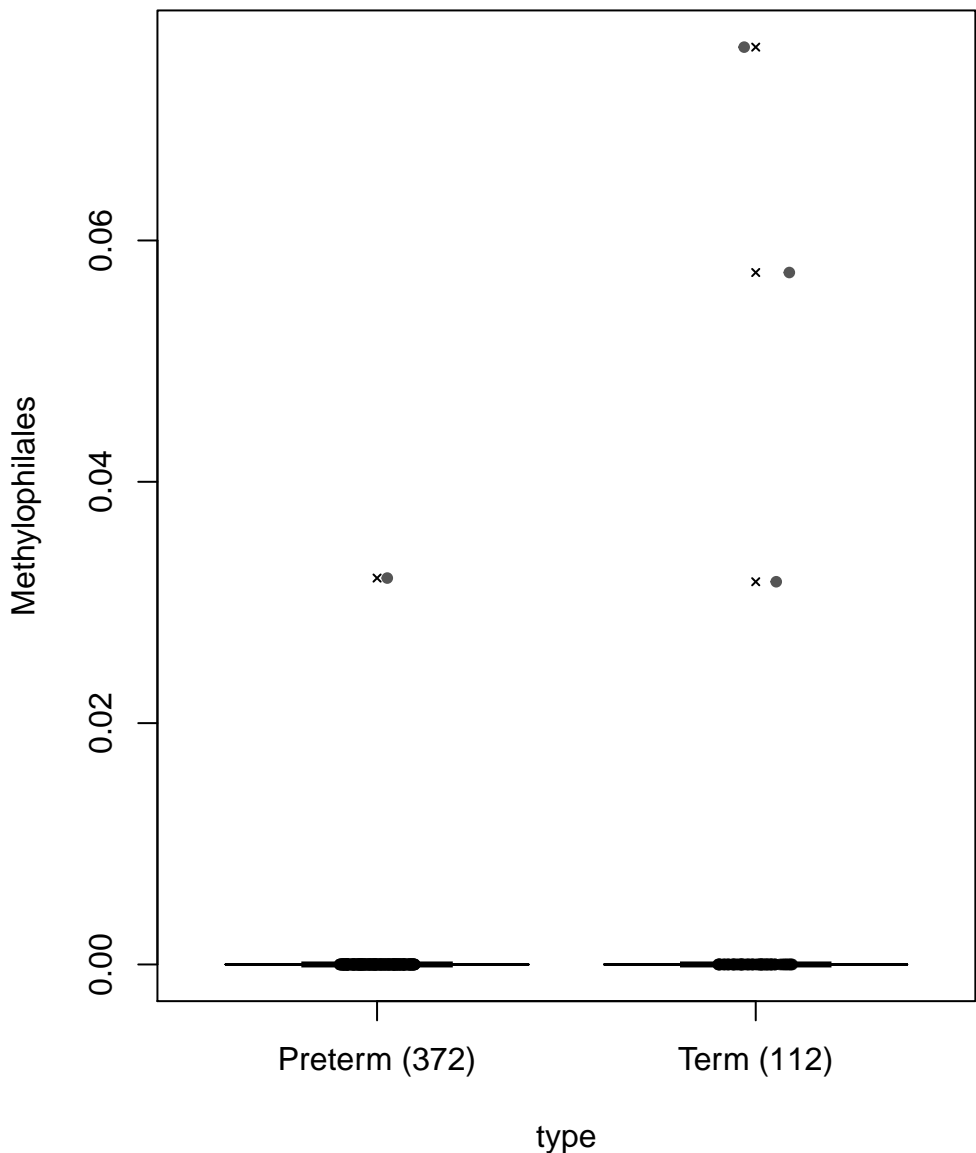

Partial Residual Plot

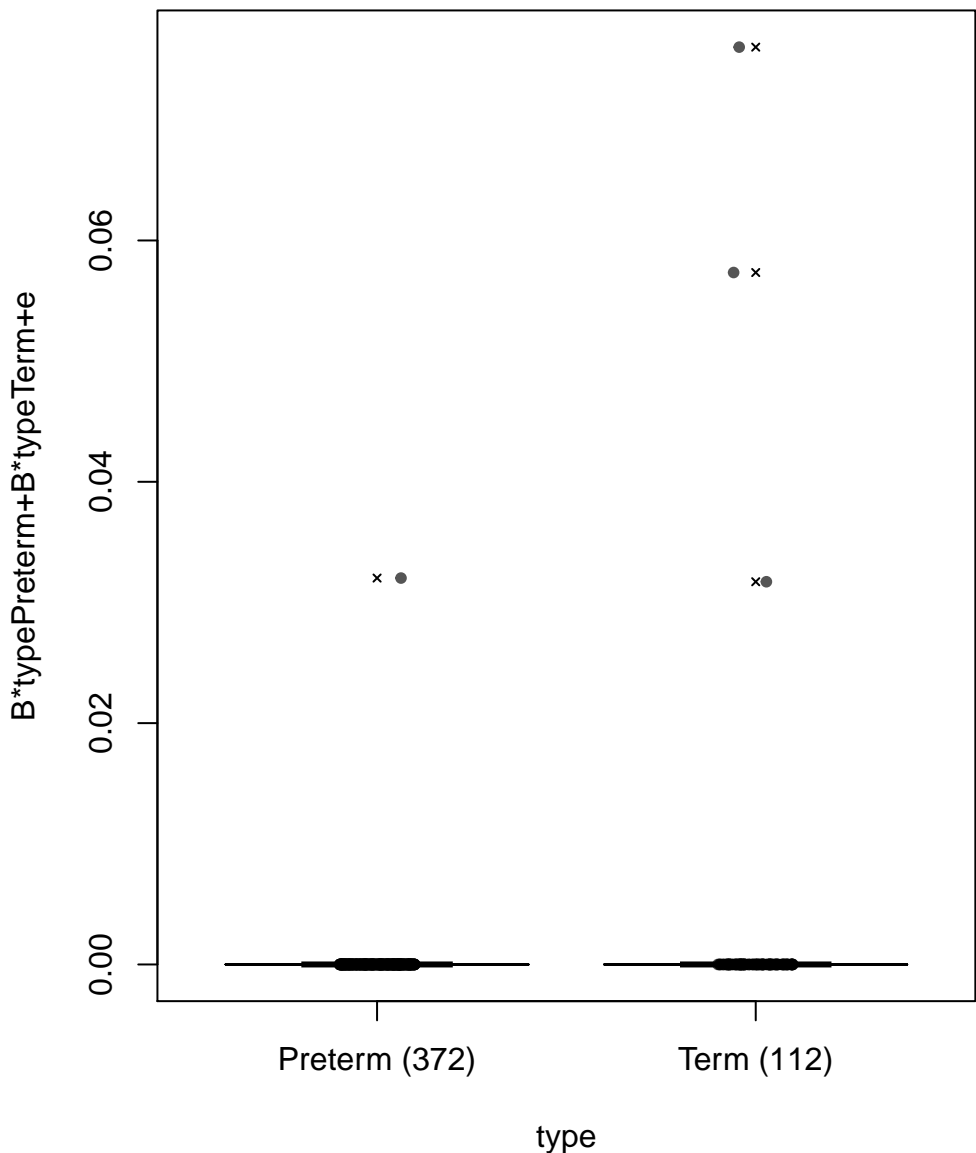

**typeTerm (0.000342 sd 0.000132, p=0.00979, q=0.0262)**

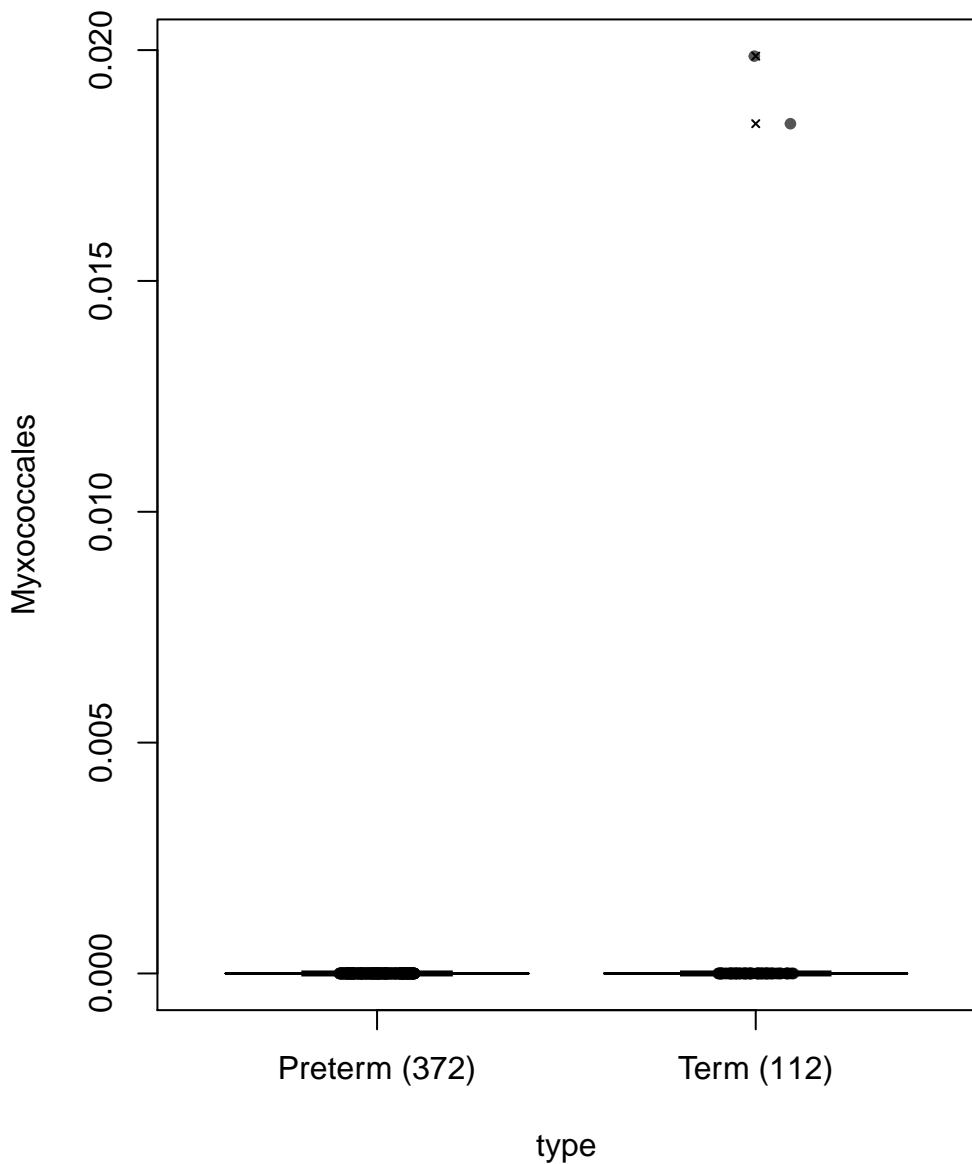

### Partial Residual Plot

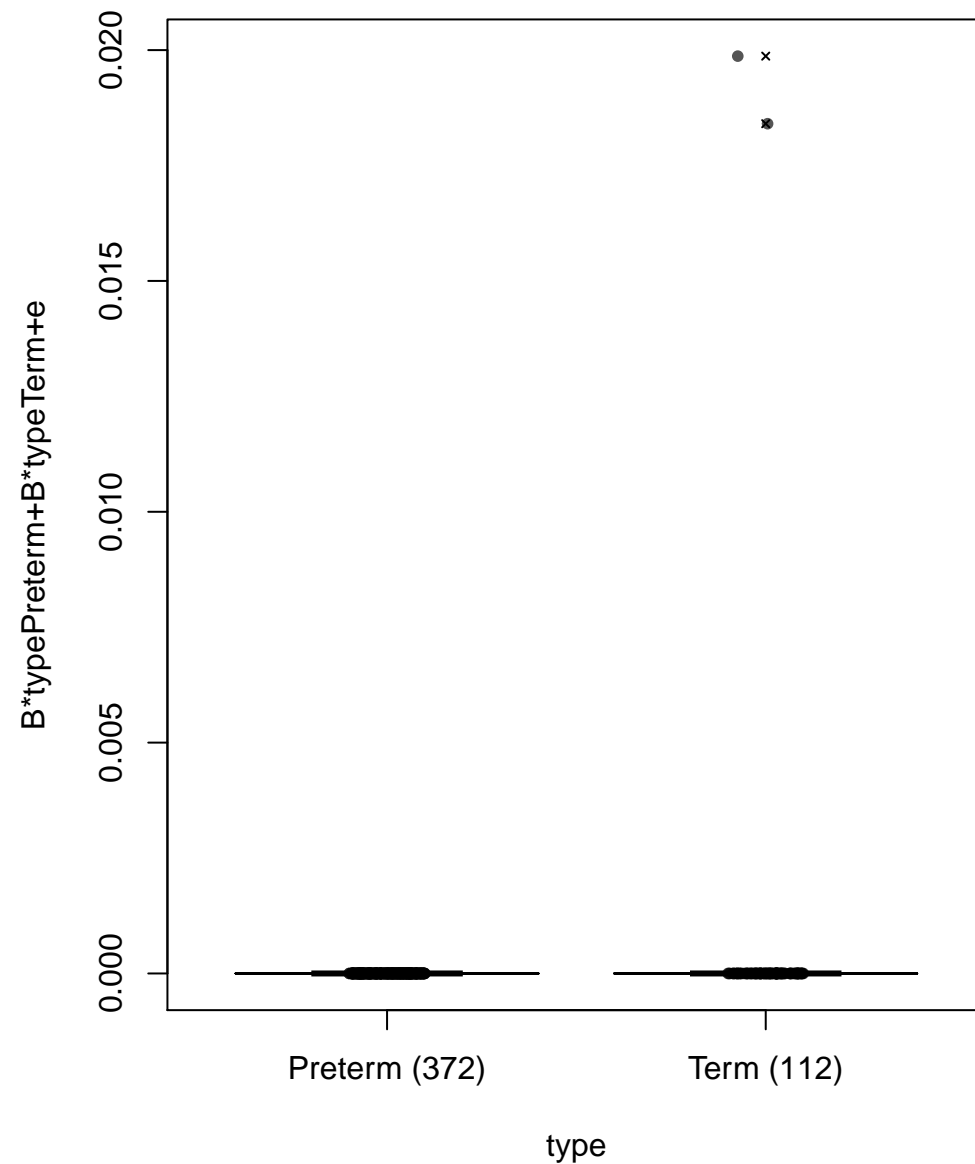

typeTerm (0.000786 sd 0.000309, p=0.0111, q=0.028)

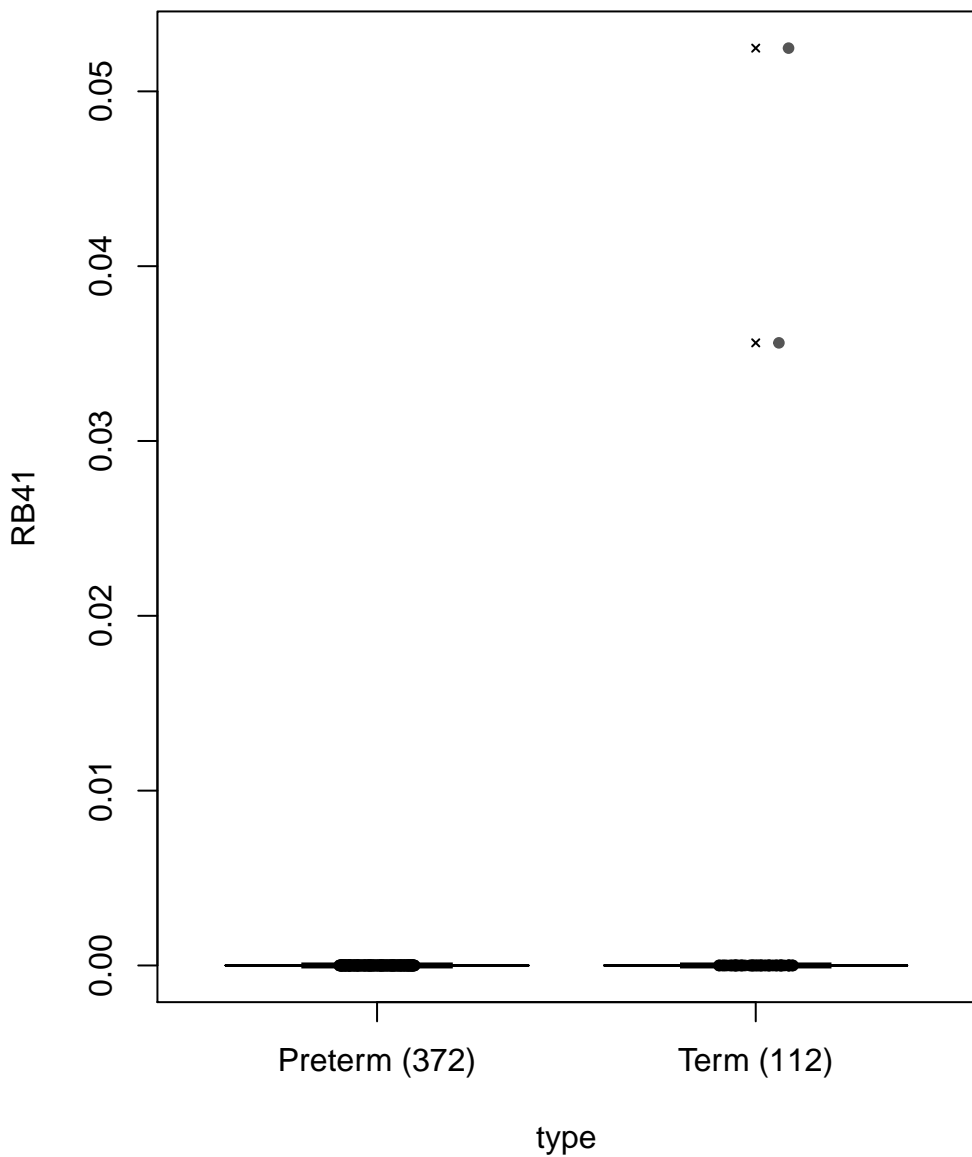

Partial Residual Plot

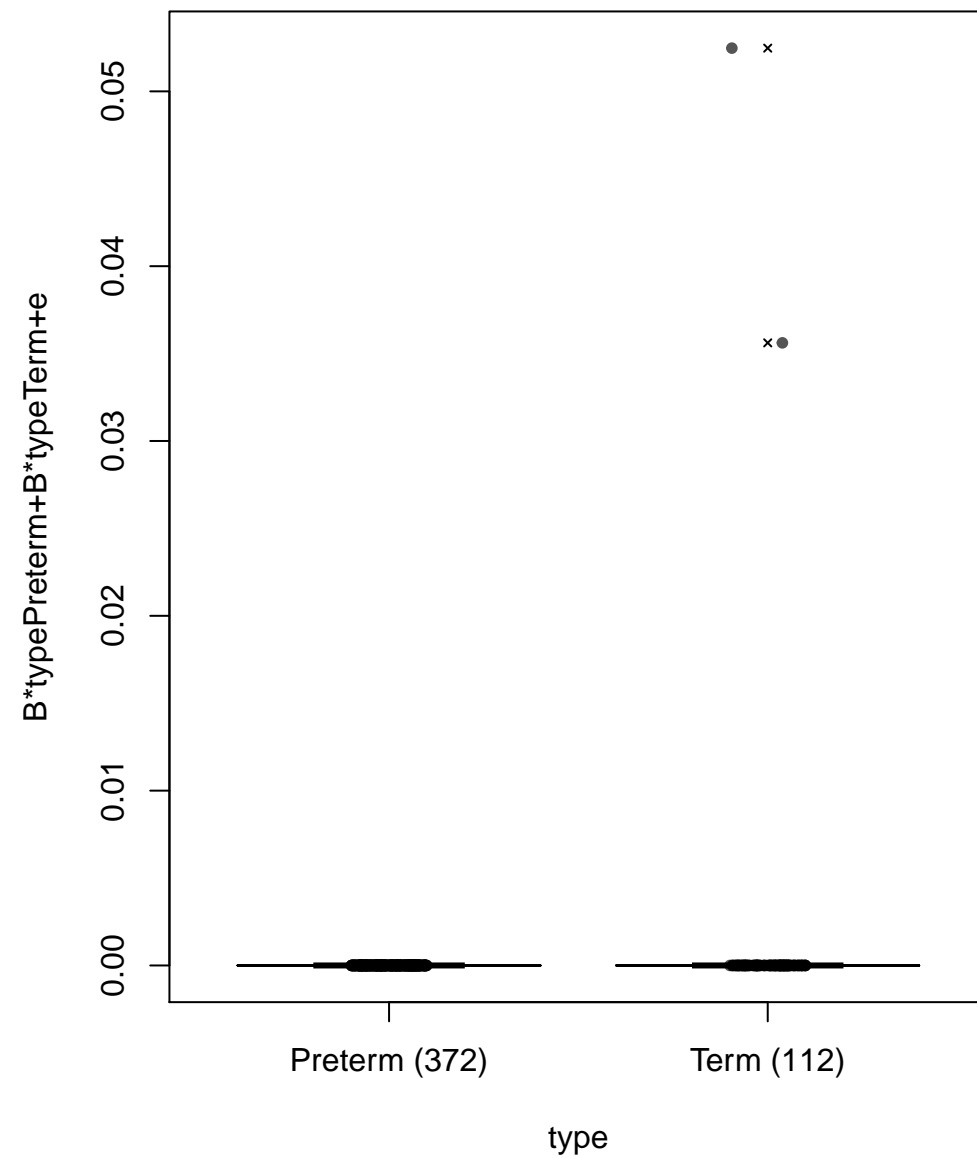

**typeTerm (0.000184 sd 7.24e-05, p=0.0113, q=0.028)**

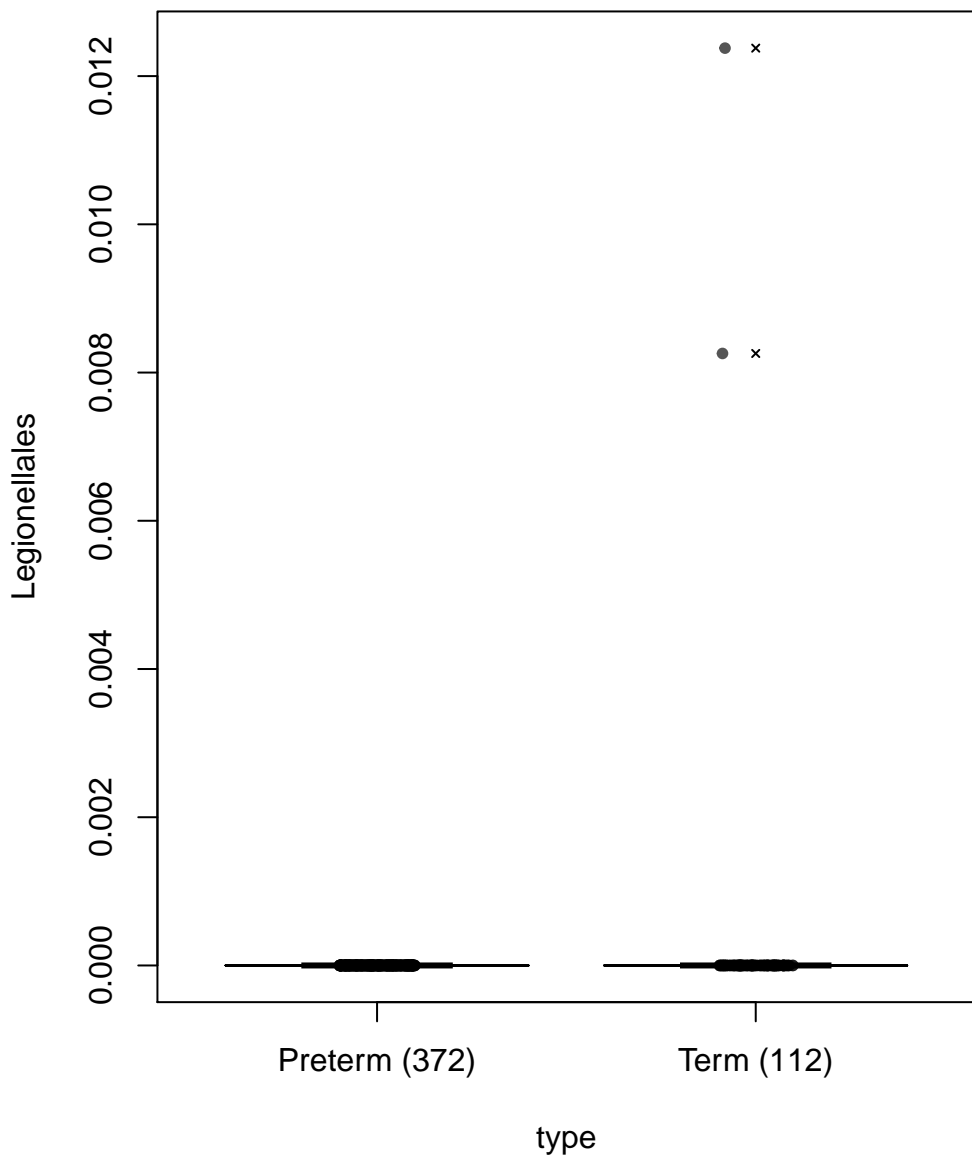

### Partial Residual Plot

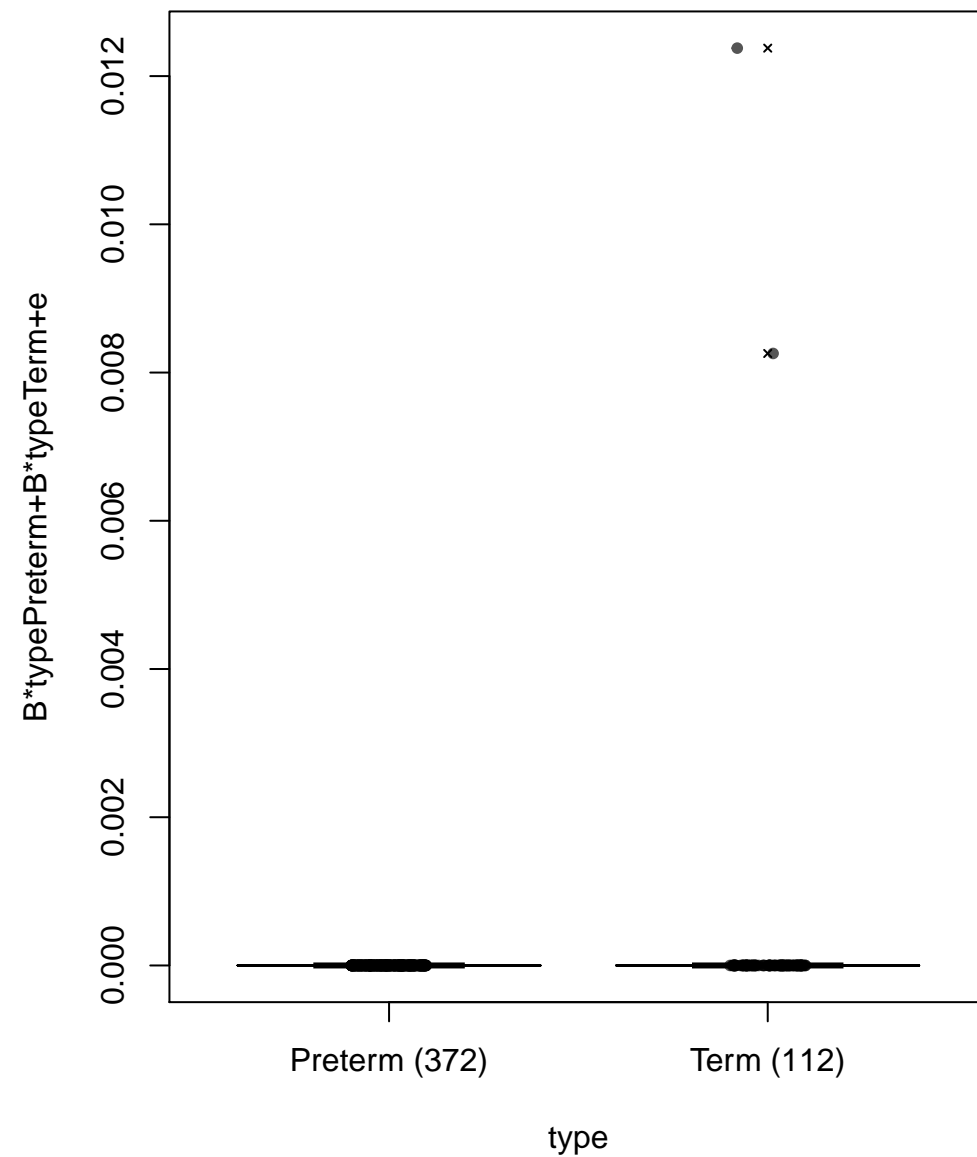

typeTerm (0.00443 sd 0.00189, p=0.0192, q=0.0459)

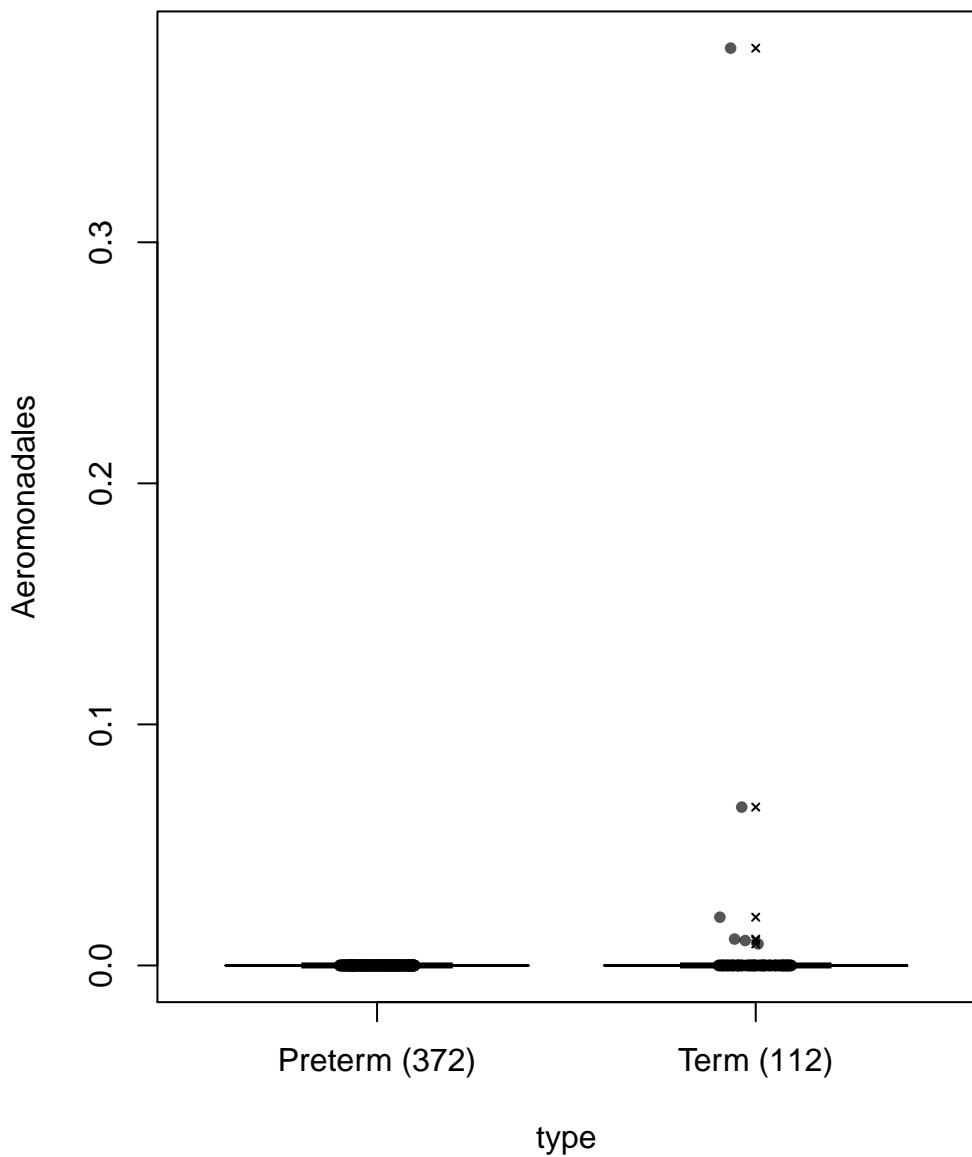

Partial Residual Plot

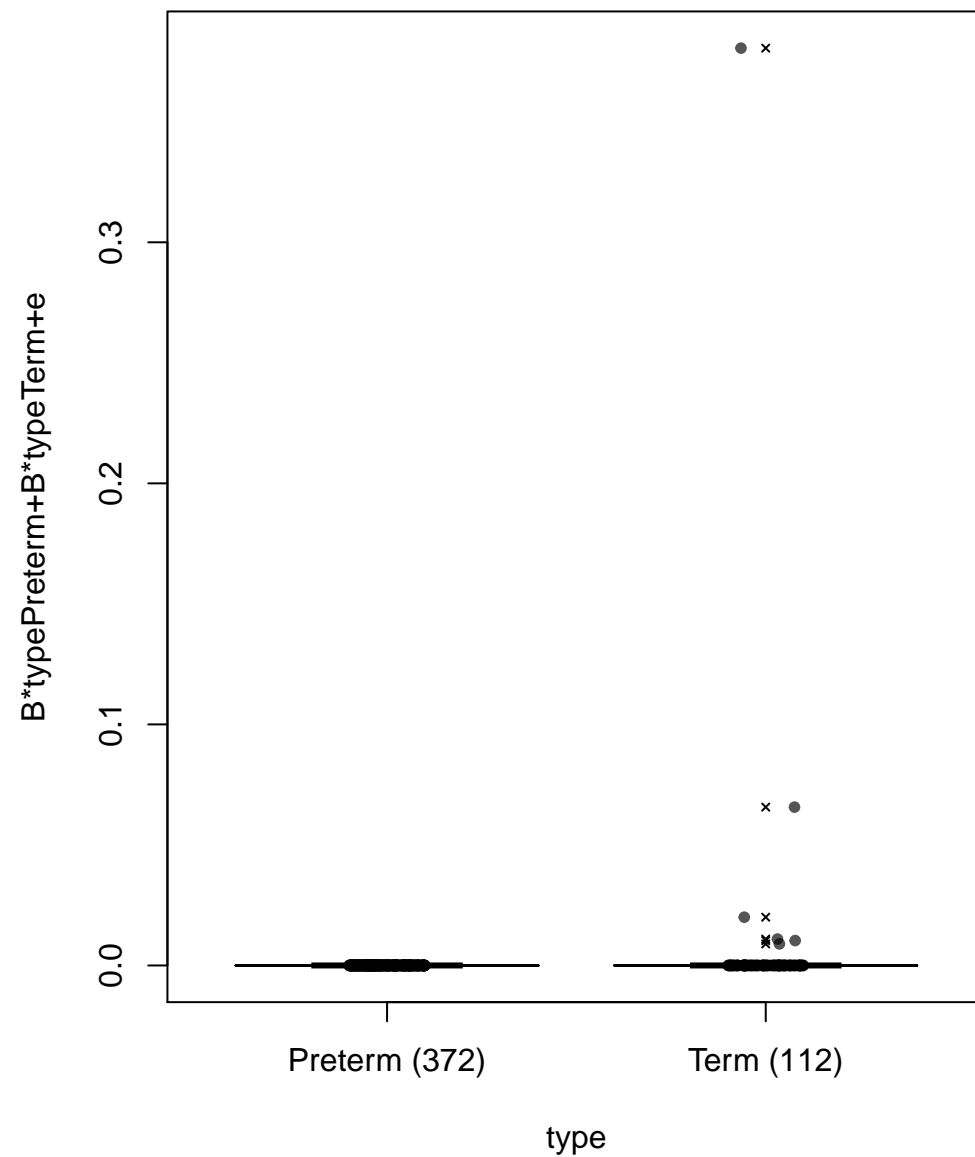

Supplement: s1 [file s1]
